# Supplementary material for: Genome-Wide Investigation and Co-Expression Network Analysis of SBT Family Gene in Gossypium
Source: Int J Mol Sci. 2023 Mar 17;24(6):5760. doi: 10.3390/ijms24065760 (PMC10056545; doi:10.3390/ijms24065760)
Supplement: Supplementary file 1 [file ijms-24-05760-s001.zip]

Archive with 12 entries (12 files):
- Supplementary_materials_rev02n.pdf
- TableS1.xlsx
- TableS10.xlsx
- TableS11.xlsx
- TableS2.xlsx
- TableS3.xlsx
- TableS4.xlsx
- TableS5.xlsx
- TableS6.xlsx
- TableS7.xlsx
- TableS8.xlsx
- TableS9.xlsx
