# Supplementary material for: Genome-Wide Investigation and Co-Expression Network Analysis of SBT Family Gene in Gossypium
Source: Int J Mol Sci. 2023 Mar 17;24(6):5760. doi: 10.3390/ijms24065760 (PMC10056545; doi:10.3390/ijms24065760)
Supplement: Supplementary file 1 [file ijms-24-05760-s001.zip › TableS1.xlsx]

## Sheet: G.hirsutum
gene ID	class	subgenome	chr	strand	start position	end position	Amino acid length	Molecular Weight	Theoretical pI	location	Inhibitor_I9	Inhibitor_I9 superfamily	Peptidases_S8_3	Peptidases_S8_S53 superfamily	Peptidases_S8_Tripeptidyl_Aminopeptidase_II	Peptidases_S8_SKI-1_like	PA_subtilisin_like	PA superfamily	fn3_6	fn3_6 superfamily	other domain	arabidopsis thaliana ID	E-Value	score	annotation
Gh_A06G0170	SBT1	A	A06	+	1833409	1835703	764	82528.6	5.81	PlasmaMembrane	32-117(1.07E-16)		114-573(2.27E-133)				352-468(1.18E-11)		652-757(3.73E-34)		AprE:[479-629(2.42E-07)]	AT5G67360.1	0	319	Subtilase family protein
Gh_A12G2124	SBT2	A	A12	-	84154474	84155005	95	10809.2	6.83	Mitochondrial		66-94(4.36E-01)										AT2G19170.1	1.43e-07	302	subtilisin-like serine protease 3
Gh_A06G0166	SBT1	A	A06	-	1765321	1767618	765	83368.4	5.84	PlasmaMembrane	32-117(5.91E-16)		114-574(2.35E-131)	405-574(2.09E-07)					653-758(2.62E-36)			AT1G04110.1	0	543	Subtilase family protein
Gh_D12G0211	SBT1	D	D12	+	2801461	2803770	703	77140.3	5.82	PlasmaMembrane	31-110(3.90E-13)		108-513(3.11E-97)						593-698(1.68E-28)			AT5G67360.1	1.72e-145	319	Subtilase family protein
Gh_D12G0210	SBT1	D	D12	+	2788215	2790419	695	74977.2	5.09	PlasmaMembrane	2-75(1.65E-10)		73-506(2.11E-100)				277-401(3.52E-17)		585-690(4.35E-26)			AT5G67360.1	1.77e-164	319	Subtilase family protein
Gh_A06G1461	SBT4	A	A06	-	97537745	97543084	737	79231.6	6.48	Extracellular	35-110(8.91E-19)		108-565(1.25E-137)				339-462(4.17E-21)		638-735(2.20E-34)			AT5G03620.1	0	474	Subtilisin-like serine endopeptidase family protein
Gh_A12G2187	SBT3	A	A12	+	84669263	84672881	822	87773.9	7.89	PlasmaMembrane	80-159(5.36E-21)		156-633(1.38E-143)				410-536(3.68E-29)		715-810(6.19E-35)			AT4G10520.1	0	295	Subtilase family protein
Gh_D11G1511	SBT5	D	D11	-	15087656	15096363	792	85391.6	7.88	PlasmaMembrane	29-114(1.13E-17)		112-616(1.12E-129)				359-489(2.50E-32)		694-789(3.48E-37)			AT3G14067.1	0	434	Subtilase family protein
Gh_D09G1326	SBT4	D	D09	+	40456448	40459617	743	80265.4	8.94	PlasmaMembrane	29-107(4.48E-15)		106-563(2.12E-132)				336-460(6.29E-15)		638-738(4.13E-26)			AT5G03620.1	0	474	Subtilisin-like serine endopeptidase family protein
Gh_A06G1462	SBT4	A	A06	-	97547694	97552430	740	79133.2	7.16	Extracellular	34-111(4.70E-16)		110-565(2.98E-125)				338-461(1.19E-22)		638-735(3.19E-35)			AT5G67360.1	0	319	Subtilase family protein
Gh_D05G1339	SBT1	D	D05	+	11812150	11814456	768	81349.3	6.42	Extracellular	27-104(2.03E-20)		102-573(3.66E-133)				344-467(3.77E-34)		656-758(5.98E-38)		AprE:[474-630(1.16E-08)]	AT1G01900.1	0	33.5	subtilase family protein
Gh_A11G1366	SBT5	A	A11	-	17607882	17612540	792	85401.7	8.7	PlasmaMembrane	29-114(3.93E-17)		112-616(1.49E-131)				359-489(3.52E-33)		694-789(9.16E-39)			AT3G14067.1	0	434	Subtilase family protein
Gh_A07G1432	SBT1	A	A07	-	39793595	39795973	792	85753.4	9.16	PlasmaMembrane	53-134(7.99E-21)		131-606(1.76E-142)				375-501(3.78E-35)		687-789(7.29E-35)			AT1G01900.1	0	33.5	subtilase family protein
Gh_A03G0178	SBT3	A	A03	-	2656827	2660883	773	83778.6	6.83	PlasmaMembrane	29-108(2.22E-17)		105-582(3.29E-132)				358-477(1.48E-13)		666-763(1.62E-32)			AT4G10520.1	0	295	Subtilase family protein
Gh_A05G0169	SBT6	A	A05	-	1813259	1818109	1038	116480	6.47	PlasmaMembrane						197-453(0.00E+00)					DUF4381 superfamily:[1000-1038(1.89E-01)];YlqF_related_GTPase superfamily:[679-711(3.26E-01)]	AT5G19660.1	0	30	SITE-1 protease
Gh_D12G2304	SBT2	D	D12	-	56246422	56246949	95	10810.2	6.27	Nuclear		66-94(4.74E-01)										AT2G19170.1	1.49e-07	302	subtilisin-like serine protease 3
Gh_D07G1529	SBT1	D	D07	-	27661233	27663611	792	85712.1	8.97	PlasmaMembrane	53-134(4.16E-21)		131-606(2.34E-141)				375-501(2.18E-34)		687-789(7.29E-35)			AT1G01900.1	0	33.5	subtilase family protein
Gh_D05G3705	SBT5	D	D05	+	61653189	61657565	771	83061.7	9.25	Chloroplast	26-111(3.44E-20)		109-590(2.74E-140)				355-486(1.09E-38)		669-768(4.88E-34)			AT1G01900.1	0	33.5	subtilase family protein
Gh_D08G0220	SBT2	D	D08	+	2121263	2126562	819	87408.8	8.23	PlasmaMembrane	65-128(6.10E-16)		131-635(2.15E-118)				379-515(2.19E-15)		721-814(1.18E-21)		T7SS_mycosin superfamily:[523-676(3.95E-10)]	AT1G30600.1	0	454	Subtilase family protein
Gh_A10G1310	SBT6	A	A10	-	68268890	68269566	81	8829.87	4.94	Extracellular				19-81(4.84E-44)								AT5G19660.2	3.36e-33	662	SITE-1 protease
Gh_A05G1761	SBT1	A	A05	-	18584731	18591379	761	81702.8	5.91	PlasmaMembrane	28-109(5.18E-16)		106-565(4.85E-126)				345-459(2.97E-11)		645-742(6.91E-31)			AT5G67090.1	0	43.1	Subtilisin-like serine endopeptidase family protein
Gh_A05G1762	SBT1	A	A05	+	18592837	18595089	750	80820.6	5.51	Extracellular	33-98(5.75E-17)		110-571(2.20E-132)				344-454(1.20E-11)		649-747(9.84E-24)		AprE:[469-632(6.43E-10)]	AT5G67360.1	0	319	Subtilase family protein
Gh_D08G1900	SBT1	D	D08	+	56888251	56890461	736	77469.7	5.17	Extracellular	31-109(8.42E-14)		106-556(5.72E-135)				330-455(6.14E-39)		636-733(1.12E-37)			AT1G01900.1	0	33.5	subtilase family protein
Gh_D09G0438	SBT1	D	D09	-	20651210	20653546	778	83541.2	8.39	Chloroplast	33-118(1.18E-23)		115-592(2.80E-151)				357-487(6.96E-38)		674-772(4.62E-38)			AT1G01900.1	0	33.5	subtilase family protein
Gh_D05G0233	SBT6	D	D05	-	2151144	2155992	1039	116855	6.71	PlasmaMembrane						197-454(7.14E-180)					YlqF_related_GTPase superfamily:[680-712(9.97E-02)]	AT5G19660.1	0	30	SITE-1 protease
Gh_D11G2004	SBT1	D	D11	-	26453180	26455465	761	80714.6	6.37	Chloroplast	33-108(1.73E-21)		105-577(1.54E-150)				346-472(7.59E-42)		658-758(1.58E-35)		AprE:[481-638(1.19E-08)]	AT1G01900.1	0	33.5	subtilase family protein
Gh_D10G1396	SBT4	D	D10	+	28132561	28132958	64	6989.28	9.81	Mitochondrial				26-61(7.20E-11)								AT5G59190.1	8.29e-09	273	subtilase family protein
Gh_A05G1760	SBT1	A	A05	+	18575421	18577034	417	44686.6	8.69	Extracellular				4-290(1.18E-36)						369-392(2.07E-01)	PI-PLCc_GDPD_SF superfamily:[287-367(1.13E-01)]	AT5G67360.1	6.79e-70	319	Subtilase family protein
Gh_A09G0896	SBT5	A	A09	-	57466043	57469721	708	75462.1	6.65	PlasmaMembrane	6-57(5.57E-08)		55-528(4.50E-133)				298-426(8.39E-23)		608-701(2.77E-35)			AT5G67360.1	0	319	Subtilase family protein
Gh_D08G0301	SBT5	D	D08	+	2936341	2939289	786	84825.4	8.88	PlasmaMembrane	29-114(2.84E-18)		112-607(2.58E-120)				372-503(7.71E-34)		686-783(1.68E-43)			AT5G67360.1	0	319	Subtilase family protein
Gh_A06G1331	SBT2	A	A06	-	94295071	94298223	825	87858.1	6.22	PlasmaMembrane	60-129(3.34E-10)		134-642(4.47E-102)				379-514(4.19E-09)		725-819(1.20E-15)			AT1G30600.1	0	454	Subtilase family protein
Gh_A01G1385	SBT1	A	A01	+	86928632	86929120	162	16654.7	5.81	Chloroplast				1-138(4.68E-52)								AT4G34980.1	3.35e-75	30.4	subtilisin-like serine protease 2
Gh_A08G0221	SBT5	A	A08	+	2316646	2319598	799	86230.4	8.93	PlasmaMembrane	29-114(3.77E-19)		112-620(1.20E-119)				385-516(7.32E-36)		699-796(8.75E-42)			AT3G14067.1	0	434	Subtilase family protein
Gh_D06G1476	SBT5	D	D06	+	48856116	48863850	780	83030.2	9	Chloroplast	27-103(3.42E-22)		108-602(5.19E-139)				370-496(1.13E-38)		679-777(8.51E-28)			AT1G04110.1	0	543	Subtilase family protein
Gh_A02G0947	SBT3	A	A02	-	39400348	39403430	765	82266.1	9.1	PlasmaMembrane	30-109(8.97E-22)		106-584(2.17E-141)				359-486(2.42E-26)		669-760(6.83E-33)		AprE:[497-650(4.12E-08)]	AT4G10520.1	0	295	Subtilase family protein
Gh_A05G1176	SBT1	A	A05	-	11844746	11847064	772	81559.6	8.74	Extracellular	25-103(4.88E-13)		101-580(6.06E-143)				342-461(1.86E-34)		662-766(5.89E-35)			AT1G01900.1	0	33.5	subtilase family protein
Gh_A05G1162	SBT1	A	A05	+	11735730	11738036	768	81330.9	6.19	Extracellular	27-104(3.05E-20)		102-573(4.63E-133)				346-467(2.31E-32)		656-758(9.77E-40)		AprE:[474-630(5.33E-09)]	AT1G01900.1	0	33.5	subtilase family protein
Gh_A05G1581	SBT5	A	A05	+	16202259	16202658	98	10600.2	6.39	Chloroplast	34-98(4.38E-16)											AT1G20160.3	4.93e-19	418	Subtilisin-like serine endopeptidase family protein
Gh_D08G1072	SBT6	D	D08	+	30422141	30453104	1386	153628	6.87	Cytoplasmic					108-583(0.00E+00)						TPPII [882-1070(1.35E-81)];Smc superfamily:[1131-1277(2.15E-03)]	AT4G20850.1	0	35	tripeptidyl peptidase ii
Gh_A05G0776	SBT4	A	A05	-	7922068	7925104	705	75302.7	8.71	Chloroplast	42-88(3.95E-12)		87-525(9.13E-111)				303-421(5.14E-20)		598-696(8.77E-34)			AT5G59100.1	0	35	Subtilisin-like serine endopeptidase family protein
Gh_A02G0839	SBT1	A	A02	+	20858525	20860825	766	81248.3	6.76	PlasmaMembrane	40-115(1.88E-21)		112-584(5.38E-139)				352-479(7.63E-39)		665-762(1.37E-32)		AprE:[490-641(2.30E-11)]	AT1G01900.1	0	33.5	subtilase family protein
Gh_A11G0221	SBT2	A	A11	-	2067999	2068489	95	10829.3	6.08	Mitochondrial		40-94(2.10E-01)										AT2G19170.1	4.53e-08	302	subtilisin-like serine protease 3
Gh_A05G1582	SBT5	A	A05	+	16202731	16205350	658	70314.5	5.77	Extracellular				14-460(3.48E-90)			225-356(6.73E-26)		544-641(1.25E-29)			AT1G20160.2	0	32.3	Subtilisin-like serine endopeptidase family protein
Gh_D05G2497	SBT1	D	D05	-	25116591	25118879	762	82348.2	5.55	PlasmaMembrane	30-115(3.24E-15)		112-571(6.77E-136)				350-466(6.55E-08)		650-755(3.64E-37)		AprE:[477-630(2.32E-08)]	AT5G67360.1	0	319	Subtilase family protein
Gh_D08G1912	SBT4	D	D08	-	57058740	57062020	778	83605.9	5.27	Extracellular	33-110(4.55E-21)		107-563(2.84E-133)				337-459(2.57E-21)		636-736(1.17E-34)			AT5G03620.1	0	474	Subtilisin-like serine endopeptidase family protein
Gh_A07G1757	SBT5	A	A07	+	71951926	71957589	769	82711.3	9.19	Extracellular	29-114(4.13E-18)		112-593(2.91E-135)				357-488(9.65E-39)		671-766(1.88E-36)			AT3G14067.1	0	434	Subtilase family protein
Gh_A09G1291	SBT4	A	A09	-	65424203	65427369	743	80568.7	8.99	PlasmaMembrane	29-107(6.68E-15)		106-563(6.08E-133)				336-460(2.71E-15)		638-738(1.56E-26)			AT5G03620.1	0	474	Subtilisin-like serine endopeptidase family protein
Gh_D11G0885	SBT4	D	D11	+	7673807	7677083	748	80314.1	9.07	PlasmaMembrane	37-114(2.51E-17)		111-568(7.40E-130)				343-466(3.33E-14)		644-743(4.47E-30)			AT5G03620.1	0	474	Subtilisin-like serine endopeptidase family protein
Gh_A08G2147	SBT6	A	A08	-	102585228	102589905	1029	115151	6.51	PlasmaMembrane						193-449(0.00E+00)						AT5G19660.1	0	30	SITE-1 protease
Gh_D07G1515	SBT6	D	D07	+	27318669	27320914	310	34529.2	6.04	PlasmaMembrane				43-278(1.09E-176)								AT5G19660.1	3.56e-169	30	SITE-1 protease
Gh_A08G2197	SBT1	A	A08	+	102984046	102985932	586	62345.5	9.88	Chloroplast			1-403(2.06E-109)				192-316(3.44E-34)		484-580(2.71E-30)		T7SS_mycosin superfamily:[329-438(2.61E-08)]	AT3G14067.1	0	434	Subtilase family protein
Gh_D10G0306	SBT5	D	D10	-	2651315	2654338	772	83701	6.72	Extracellular	26-101(6.50E-22)		107-596(1.40E-127)				364-492(5.58E-30)		672-769(1.68E-24)			AT5G67360.1	0	319	Subtilase family protein
Gh_A08G1149	SBT4	A	A08	+	80754967	80757544	690	74067.7	9.2	Mitochondrial	3-55(1.82E-13)		53-510(2.12E-131)				283-406(6.60E-16)		586-685(4.95E-29)			AT5G03620.1	0	474	Subtilisin-like serine endopeptidase family protein
Gh_D10G0493	SBT1	D	D10	+	4681176	4683494	772	81399.4	8.47	Extracellular	25-103(1.98E-15)		102-580(3.53E-143)				342-475(1.84E-37)		662-766(7.10E-31)			AT1G01900.1	0	33.5	subtilase family protein
Gh_A10G0470	SBT1	A	A10	+	4896066	4898384	772	81512.8	8.9	Extracellular	25-103(4.19E-15)		102-580(5.00E-144)				342-475(3.52E-36)		662-766(7.90E-31)			AT1G01900.1	0	33.5	subtilase family protein
Gh_D13G0016	SBT5	D	D13	-	126823	132995	798	86330.6	8.66	PlasmaMembrane	62-137(4.98E-16)		134-617(1.36E-130)				382-512(2.78E-27)		698-795(6.64E-27)		AprE:[523-677(1.20E-07)]	AT1G20160.2	0	32.3	Subtilisin-like serine endopeptidase family protein
Gh_D05G1759	SBT5	D	D05	+	15866484	15869573	778	82908.6	6.34	Extracellular	34-109(1.52E-20)		106-579(2.55E-106)				343-474(6.90E-26)		664-765(7.04E-30)		AprE:[485-640(5.37E-08)]	AT1G20160.2	0	32.3	Subtilisin-like serine endopeptidase family protein
Gh_A10G0304	SBT5	A	A10	-	2757742	2763520	772	83600.9	7.05	Extracellular	26-101(2.33E-21)		107-618(5.27E-123)				364-492(5.75E-31)		694-767(1.41E-10)			AT2G04160.1	0	37.7	Subtilisin-like serine endopeptidase family protein
Gh_D06G1660	SBT2	D	D06	-	55207324	55210476	826	87967.2	6.04	PlasmaMembrane	60-134(2.91E-11)		132-642(1.32E-103)				379-514(1.74E-09)		726-820(1.07E-15)			AT5G44530.1	0	424	Subtilase family protein
Gh_A08G0882	SBT6	A	A08	+	51024391	51039173	1393	153969	6.39	Cytoplasmic					108-590(0.00E+00)						BDP1 superfamily:[1070-1248(5.61E-03)];TPPII :[889-1077(2.29E-82)];PRK03918 superfamily:[1166-1362(4.03E-02)];DUF3020 superfamily:[224-237(5.68E-01)]	AT4G20850.1	0	35	tripeptidyl peptidase ii
Gh_A06G1085	SBT5	A	A06	+	66222358	66230135	778	82900.1	9.01	Chloroplast	25-101(1.68E-21)		106-600(6.36E-139)				368-494(4.44E-39)		677-775(1.42E-26)		AprE:[511-660(1.03E-07)]	AT1G04110.1	0	543	Subtilase family protein
Gh_D08G0012	SBT4	D	D08	+	160741	163705	743	79839.4	8.78	PlasmaMembrane	33-106(1.77E-15)			192-561(4.50E-94)			345-458(1.55E-19)		635-733(4.47E-32)			AT5G59100.1	0	35	Subtilisin-like serine endopeptidase family protein
Gh_D08G0013	SBT4	D	D08	+	164278	179646	1289	140449	6.16	Nuclear	3-80(4.12E-18)			78-231(7.28E-50)							MOT2 superfamily:[256-511(3.57E-78)];	AT5G59090.2	0	607	subtilase 4.12
Gh_D07G1962	SBT5	D	D07	+	48876727	48882362	769	82630.2	9.19	Extracellular	29-114(2.74E-18)		112-593(3.71E-134)				357-488(3.35E-38)		671-766(1.03E-26)			AT3G14067.1	0	434	Subtilase family protein
Gh_D08G0018	SBT4	D	D08	-	209332	219341	1376	147282	7.48	PlasmaMembrane	33-110(2.00E-18)		107-553(8.01E-125)				946-1091(2.14E-16)		598-664(9.99E-15)	1335-1376(1.12E-08)		AT5G59100.1	0	35	Subtilisin-like serine endopeptidase family protein
Gh_D08G0019	SBT4	D	D08	-	220653	221335	191	19542.8	5.8	Chloroplast				36-179(1.96E-59)								AT5G58840.2	9.5e-58	358	Subtilase family protein
Gh_D08G0020	SBT4	D	D08	-	225066	228058	735	78804.6	6.47	Extracellular	33-110(3.77E-19)		107-553(3.13E-130)				330-450(1.25E-17)		627-725(6.08E-30)			AT5G03620.1	0	474	Subtilisin-like serine endopeptidase family protein
Gh_A11G0757	SBT4	A	A11	+	7509137	7512411	749	80415.1	8.88	PlasmaMembrane	37-114(1.72E-17)		111-569(1.55E-129)				343-467(1.07E-12)		645-744(1.85E-29)			AT5G03620.1	0	474	Subtilisin-like serine endopeptidase family protein
Gh_D13G2322	SBT4	D	D13	+	59315208	59323459	977	109563	5.93	Nuclear				390-833(1.22E-27)				662-737(1.80E-01)			XRN_M superfamily:[79-266(7.98E-69)];	AT5G03620.2	3.02e-43	32	Subtilisin-like serine endopeptidase family protein
Gh_A08G1601	SBT4	A	A08	-	94599694	94603005	778	83688.1	5.49	Extracellular	33-110(8.47E-21)		107-563(4.67E-133)				337-459(1.81E-21)		636-736(1.35E-34)			AT3G14240.1	0	402	Subtilase family protein
Gh_A08G1591	SBT1	A	A08	+	94367153	94369417	754	80842.1	6.06	Chloroplast	38-119(2.00E-11)		118-573(8.79E-124)				347-474(6.77E-40)		655-751(3.21E-40)			AT1G01900.1	0	33.5	subtilase family protein
Gh_A08G1590	SBT1	A	A08	+	94364160	94366370	736	77537.9	5.34	Extracellular	31-109(1.82E-14)		106-556(1.37E-133)				330-455(6.60E-38)		636-733(1.54E-36)			AT1G01900.1	0	33.5	subtilase family protein
Gh_A08G0161	SBT2	A	A08	+	1576215	1583323	856	91536.5	7.97	PlasmaMembrane	102-165(4.54E-16)		168-672(2.50E-118)				416-552(1.85E-15)		758-851(1.31E-21)		T7SS_mycosin superfamily:[560-713(2.66E-10)]	AT1G30600.1	0	454	Subtilase family protein
Gh_D05G0906	SBT4	D	D05	-	7625347	7629902	876	95914.1	8.82	Chloroplast	4-78(6.33E-18)		77-527(9.31E-131)				305-423(6.82E-22)		600-672(9.94E-23)		PPR_2:[760-809(1.55E-09)];	AT5G03620.1	0	474	Subtilisin-like serine endopeptidase family protein
Gh_D12G2367	SBT3	D	D12	+	56766925	56770544	822	87782.9	7.09	PlasmaMembrane	80-159(6.18E-22)		156-633(6.33E-144)				412-536(2.34E-29)		715-810(3.42E-35)			AT4G10520.1	0	295	Subtilase family protein
Gh_D02G0889	SBT1	D	D02	+	17264099	17266399	766	81253.5	6.76	PlasmaMembrane	40-115(6.64E-22)		112-584(9.30E-141)				352-479(5.59E-38)		665-762(7.73E-32)		AprE:[494-642(1.88E-11)]	AT1G01900.1	0	33.5	subtilase family protein
Gh_D08G1431	SBT4	D	D08	+	47181319	47190002	751	80818.8	9.38	Mitochondrial	39-116(5.09E-20)		114-571(8.61E-132)				344-467(9.15E-16)		647-746(2.88E-29)			AT5G03620.1	0	474	Subtilisin-like serine endopeptidase family protein
Gh_A06G0020	SBT5	A	A06	+	92354	95533	769	81890.3	6.44	Extracellular	31-106(8.45E-21)		103-582(2.18E-134)				348-478(1.29E-27)		666-763(1.29E-33)		AprE:[487-642(2.28E-09)]	AT1G20160.2	0	32.3	Subtilisin-like serine endopeptidase family protein
Gh_A03G0044	SBT2	A	A03	+	630873	634111	812	87216.8	8.43	PlasmaMembrane	51-114(8.16E-07)		114-630(2.20E-106)	529-665(7.08E-09)			371-506(5.35E-09)		712-804(8.87E-20)			AT1G30600.1	0	454	Subtilase family protein
Gh_D08G2562	SBT1	D	D08	+	65304896	65307260	764	81809.1	9.41	Chloroplast	30-107(2.73E-22)		104-579(3.13E-148)				349-474(1.76E-38)		660-757(1.45E-30)			AT1G01900.1	0	33.5	subtilase family protein
Gh_A04G0029	SBT5	A	A04	-	240309	244701	771	82940.5	9.21	Chloroplast	26-111(1.91E-19)		109-590(1.50E-140)				355-486(3.65E-35)		669-768(2.09E-32)		M35_like superfamily:[602-647(1.40E-01)]	AT1G01900.1	0	33.5	subtilase family protein
Gh_D08G2514	SBT6	D	D08	-	64894704	64899384	1029	115262	6.2	PlasmaMembrane						193-449(0.00E+00)						AT5G19660.1	0	30	SITE-1 protease
Gh_A13G1684	SBT1	A	A13	-	75794484	75796897	760	80859	9.02	Chloroplast	23-100(4.51E-22)		97-576(3.50E-145)				346-469(5.76E-38)		657-754(1.07E-30)		AprE:[476-637(1.17E-07)]	AT1G01900.1	0	33.5	subtilase family protein
Gh_D03G1406	SBT3	D	D03	+	42818370	42822422	773	83950	7.26	PlasmaMembrane	29-108(3.13E-15)		105-582(4.07E-133)				358-477(5.79E-13)		666-763(1.26E-31)			AT4G10520.1	0	295	Subtilase family protein
Gh_A10G2026	SBT4	A	A10	+	98115942	98119305	707	76434.2	6.37	PlasmaMembrane	34-112(4.08E-21)		109-532(1.48E-118)				306-429(1.70E-19)		605-701(2.83E-37)			AT5G03620.1	0	474	Subtilisin-like serine endopeptidase family protein
Gh_D11G1939	SBT1	D	D11	-	24201098	24203389	763	83128.4	6.75	PlasmaMembrane	26-112(1.14E-16)		109-568(5.43E-123)				350-462(3.51E-11)		646-750(1.80E-29)			AT5G67090.1	0	43.1	Subtilisin-like serine endopeptidase family protein
Gh_A12G0941	SBT1	A	A12	+	59702622	59704685	687	73656	8.48	Mitochondrial	25-108(2.63E-12)		107-572(2.02E-142)				345-468(1.78E-33)					AT1G01900.1	0	33.5	subtilase family protein
Gh_A12G0940	SBT1	A	A12	+	59696401	59698713	770	82800	9.19	Chloroplast	28-114(3.43E-14)		113-585(2.63E-137)				358-481(1.93E-23)		666-767(1.02E-36)			AT1G01900.1	0	33.5	subtilase family protein
Gh_A12G0939	SBT1	A	A12	+	59686507	59688974	772	82847.8	8.13	Chloroplast	34-120(1.15E-12)		119-587(2.72E-137)				362-483(3.52E-28)		668-769(1.09E-39)			AT1G01900.1	0	33.5	subtilase family protein
Gh_A10G2025	SBT4	A	A10	+	98086505	98113464	1075	115755	6.02	PlasmaMembrane	54-95(2.47E-13)		92-540(1.48E-110)	827-900(6.67E-35)			314-436(1.60E-17)		973-1069(2.85E-35)			AT5G03620.1	0	474	Subtilisin-like serine endopeptidase family protein
Gh_A10G2027	SBT4	A	A10	+	98136459	98140942	713	76268.3	5.27	PlasmaMembrane	11-87(7.43E-16)		84-539(7.69E-130)				314-437(6.24E-22)		611-707(8.86E-33)			AT5G67360.1	0	319	Subtilase family protein
Gh_A10G2024	SBT4	A	A10	+	98043469	98054502	715	77361.3	5.38	PlasmaMembrane	34-112(8.64E-21)		110-331(4.81E-101)	432-507(5.32E-07)			339-450(8.36E-11)		613-709(1.17E-35)			AT5G59100.1	0	35	Subtilisin-like serine endopeptidase family protein
Gh_D05G1955	SBT1	D	D05	-	17968804	17971083	759	81163.9	5.71	PlasmaMembrane	28-109(9.19E-19)		106-563(2.23E-128)				345-457(2.99E-13)		643-740(8.64E-30)			AT5G67090.1	0	43.1	Subtilisin-like serine endopeptidase family protein
Gh_A05G1808	SBT1	A	A05	-	18974601	18976907	768	80850.5	6.33	PlasmaMembrane	34-109(4.03E-19)		106-578(7.38E-139)				346-473(5.15E-40)		659-764(2.26E-31)		AprE:[484-680(3.38E-10)]	AT1G01900.1	0	33.5	subtilase family protein
Gh_D11G0095	SBT6	D	D11	-	907125	920788	1311	145046	5.9	Cytoplasmic					39-522(0.00E+00)						TPPII :[821-1006(2.30E-81)];PRK03918 superfamily:[1072-1280(7.22E-03)];FbpA superfamily:[161-208(2.64E-01)]	AT4G20850.1	0	35	tripeptidyl peptidase ii
Gh_D05G1060	SBT2	D	D05	-	8979955	8986239	805	86364.7	6.36	PlasmaMembrane	82-138(1.66E-12)		138-620(1.25E-108)				359-494(2.36E-13)		707-800(3.14E-20)		AprE:[530-674(9.39E-07)]	AT1G30600.1	0	454	Subtilase family protein
Gh_D09G0922	SBT5	D	D09	-	34630470	34634150	724	77333.3	7.53	PlasmaMembrane	28-73(1.52E-09)		71-544(1.06E-132)				314-442(4.18E-22)		624-717(2.94E-35)			AT5G67360.1	0	319	Subtilase family protein
Gh_D13G0300	SBT3	D	D13	-	2917622	2921761	786	84555.7	8.55	PlasmaMembrane	30-117(1.78E-20)		114-598(1.55E-136)				361-489(3.26E-25)		679-764(4.39E-28)		AprE:[501-660(3.56E-06)]	AT4G10520.1	0	295	Subtilase family protein
Gh_D13G1265	SBT3	D	D13	+	38880219	38882222	126	13519.5	6.4	Extracellular	43-119(1.88E-17)											AT1G66220.1	1.91e-41	457	Subtilase family protein
Gh_D11G0235	SBT2	D	D11	-	1954792	1955280	95	10820.3	5.79	Mitochondrial		40-94(1.26E-01)										AT2G19170.1	2.98e-08	302	subtilisin-like serine protease 3
Gh_A10G0049	SBT2	A	A10	-	488887	492395	841	90601.8	6.25	PlasmaMembrane	76-149(5.65E-13)		149-656(1.36E-121)				395-530(2.68E-13)		743-836(5.32E-15)		AprE:[545-743(3.82E-07)]	AT1G30600.1	0	454	Subtilase family protein
Gh_D03G0815	SBT3	D	D03	+	27863734	27866813	765	82278.1	8.96	PlasmaMembrane	30-109(2.01E-21)		106-584(7.07E-142)				359-486(4.90E-28)		669-759(9.40E-31)		AprE:[497-650(2.94E-09)]	AT4G10520.1	0	295	Subtilase family protein
Gh_A13G1017	SBT3	A	A13	+	56621569	56623563	129	13645.6	6.04	Extracellular	46-122(7.47E-16)											AT1G66220.1	2.69e-42	457	Subtilase family protein
Gh_D05G2004	SBT1	D	D05	-	18418662	18420968	768	80788.6	6.5	PlasmaMembrane	34-109(2.19E-18)		106-578(1.56E-137)				346-473(1.46E-39)		659-764(7.06E-31)		AprE:[484-680(4.35E-10)]	AT1G01900.1	0	33.5	subtilase family protein
Gh_D05G1956	SBT1	D	D05	+	17972573	17974866	750	81000.8	5.45	Extracellular	33-111(6.85E-17)		110-571(2.06E-129)				344-454(1.02E-11)		649-747(8.26E-24)		AprE:[469-632(4.51E-10)]	AT5G67360.1	0	319	Subtilase family protein
Gh_D12G1029	SBT1	D	D12	+	36089873	36092895	767	82105	8.13	Chloroplast	34-120(2.65E-13)		119-584(5.43E-137)				359-480(2.17E-28)		665-765(1.81E-39)			AT1G01900.1	0	33.5	subtilase family protein
Gh_D12G1031	SBT1	D	D12	+	36105130	36107436	768	82536.4	7.58	PlasmaMembrane	37-120(3.28E-12)		119-580(7.80E-143)				357-476(2.64E-33)		664-765(1.56E-27)			AT1G01900.1	0	33.5	subtilase family protein
Gh_D12G1030	SBT1	D	D12	+	36098990	36101245	751	80608.3	9.18	Mitochondrial	14-100(8.44E-14)		99-569(3.27E-137)				342-465(8.90E-24)		651-750(2.12E-33)			AT1G01900.1	0	33.5	subtilase family protein
Gh_Sca168900G01	SBT4	D	scaffold168900	-	34	240	69	7653.75	7.81	Extracellular										43-69(6.99E-02)		AT4G00230.1	1.73e-25	1187	xylem serine peptidase 1
Gh_Sca122440G01	SBT1	unkown	scaffold122440	+	142	318	59	5886.78	8.03	Nuclear				1-34(1.16E-15)								AT1G04110.1	1.66e-24	543	Subtilase family protein
Gh_Sca133970G01	SBT1	unkown	scaffold133970	+	44	379	112	12319.9	5.07	Extracellular										75-112(2.24E-10)		AT5G67090.1	6.05e-24	43.1	Subtilisin-like serine endopeptidase family protein
Gh_Sca089082G01	SBT5	unkown	scaffold89082	+	269	541	90	9978.58	9.59	Extracellular									2-83(2.88E-29)			AT1G20160.2	1.73e-17	32.3	Subtilisin-like serine endopeptidase family protein
Gh_Sca011376G01	SBT3	unkown	scaffold11376	-	457	2844	634	67260.9	5.32	Extracellular			1-447(2.11E-122)				228-351(3.92E-22)		530-625(6.72E-35)			AT4G10520.1	0	295	Subtilase family protein
Gh_Sca012292G01	SBT4	D	scaffold12292	+	2342	2827	161	17370.8	8.48	Extracellular				21-149(5.09E-10)								AT5G03620.2	7.92e-09	32	Subtilisin-like serine endopeptidase family protein
Gh_D03G1832	SBT2	D	scaffold3938_D03	+	20651	23869	813	87224.8	8.44	PlasmaMembrane	52-115(3.81E-07)		115-631(9.60E-101)	515-612(3.65E-12)			372-507(5.96E-09)		713-805(4.62E-21)		fusolisin superfamily:[595-676(7.12E-04)]	AT1G30600.1	0	454	Subtilase family protein
Gh_A06G2090	SBT6	A	scaffold1491_A06	+	12719	13648	136	15289.2	4.88	PlasmaMembrane				16-136(9.80E-88)								AT5G19660.1	9.77e-82	30	SITE-1 protease
Gh_D06G2355	SBT4	D	scaffold4156_D06	-	20004	23372	643	68780.3	5.9	Extracellular			14-471(7.96E-140)				245-368(1.04E-18)		544-641(3.18E-35)			AT5G03620.1	0	474	Subtilisin-like serine endopeptidase family protein
Gh_Sca004818G01	SBT4	D	scaffold4818	-	8089	11807	736	78861	5.65	PlasmaMembrane	29-105(1.86E-15)		102-557(3.20E-129)				332-453(8.63E-19)		629-730(1.56E-33)		AprE:[467-639(5.32E-07)]	AT5G03620.1	0	474	Subtilisin-like serine endopeptidase family protein
Gh_A11G3111	SBT1	A	scaffold2772_A11	+	26032	28203	723	78585.2	8.22	Chloroplast	1-77(3.64E-11)		74-533(7.13E-123)				315-427(1.18E-10)		611-715(1.52E-29)			AT5G67090.1	0	43.1	Subtilisin-like serine endopeptidase family protein
Gh_Sca005023G04	SBT1	D	scaffold5023	-	22244	24657	760	80696.7	8.86	Chloroplast	23-100(1.51E-23)		97-576(8.13E-146)				346-469(3.36E-37)		657-754(8.76E-32)		AprE:[476-637(1.56E-07)]	AT1G01900.1	0	33.5	subtilase family protein
Gh_Sca004818G04	SBT4	D	scaffold4818	-	32053	35424	740	79628.6	6.18	Extracellular	34-112(2.68E-21)		109-565(1.12E-131)				339-462(4.89E-21)		638-734(7.81E-38)			AT5G67360.1	0	319	Subtilase family protein
Gh_Sca004818G05	SBT4	D	scaffold4818	-	37907	41328	754	80872.4	6.83	PlasmaMembrane	48-126(6.84E-23)		123-579(9.43E-130)				353-476(3.45E-21)		652-748(1.95E-35)			AT5G67360.1	0	319	Subtilase family protein
Gh_Sca004818G06	SBT4	D	scaffold4818	-	43028	50447	781	84619.8	6.11	PlasmaMembrane	34-112(2.19E-22)		110-553(2.57E-126)				339-450(6.14E-11)		626-722(2.06E-37)			AT5G03620.1	0	474	Subtilisin-like serine endopeptidase family protein
Gh_Sca004818G02	SBT4	D	scaffold4818	-	13666	17509	695	74770.6	6.05	Chloroplast	10-72(1.21E-15)		69-522(1.37E-126)				299-418(1.22E-18)		595-694(2.54E-34)			AT5G67360.1	0	319	Subtilase family protein
Gh_Sca004818G03	SBT4	D	scaffold4818	-	18911	23610	713	76369.2	5.21	PlasmaMembrane	11-87(7.72E-16)		84-539(1.91E-130)				314-437(5.14E-22)		611-707(2.96E-34)		AprE:[416-608(2.19E-06)]	AT5G67360.1	0	319	Subtilase family protein
Gh_D06G2361	SBT4	D	scaffold4158_D06	+	15102	20449	733	78812	5.8	PlasmaMembrane	35-110(8.86E-19)		108-560(3.35E-144)				339-457(9.36E-14)		633-731(5.56E-37)			AT5G03620.1	0	474	Subtilisin-like serine endopeptidase family protein
Gh_A10G2239	SBT1	A	scaffold2454_A10	+	25894	28203	769	81522	5.9	Extracellular	28-105(8.49E-20)		103-574(6.49E-145)				345-468(9.35E-37)		657-758(1.15E-40)			AT1G01900.1	0	33.5	subtilase family protein
Gh_A08G2564	SBT4	A	scaffold2273_A08	+	78064	81036	702	75491.9	8.69	PlasmaMembrane	33-110(3.96E-19)		107-520(1.56E-136)				330-436(1.69E-10)		594-692(1.68E-31)			AT5G59100.1	0	35	Subtilisin-like serine endopeptidase family protein
Gh_A05G3884	SBT2	A	scaffold1236_A05	-	37176	43449	830	88870.6	6.21	PlasmaMembrane	36-138(3.05E-12)		138-645(2.91E-122)				384-519(3.24E-13)		732-825(3.40E-20)		AprE:[534-707(2.22E-07)]	AT1G30600.1	0	454	Subtilase family protein
Gh_A08G2570	SBT4	A	scaffold2273_A08	-	118990	128416	1391	148960	8.32	PlasmaMembrane	689-766(1.56E-18)		763-1213(1.79E-118)	984-1103(1.16E-20)				581-679(6.88E-30)	1350-1389(4.04E-07)		denti_PrtP superfamily:	AT5G59100.1	0	35	Subtilisin-like serine endopeptidase family protein
Gh_A09G2501	SBT1	A	scaffold2377_A09	+	51902	54238	778	83521.2	8.5	Chloroplast	33-118(1.00E-23)		115-592(1.19E-150)				357-487(1.57E-37)		674-772(3.99E-38)			AT1G01900.1	0	33.5	subtilase family protein
Gh_A12G0208	SBT1	A	A12	+	3128102	3130300	693	74868.1	5.11	PlasmaMembrane	4-75(1.14E-09)		73-504(5.62E-101)				277-399(1.67E-13)		583-688(4.76E-27)			AT3G14240.1	8.35e-166	402	Subtilase family protein
Gh_D10G2586	SBT1	D	scaffold4479_D10	+	12483	14792	769	81575	5.85	Extracellular	28-105(7.55E-20)		103-574(3.99E-145)				345-468(1.25E-37)		657-758(7.44E-41)			AT1G01900.1	0	33.5	subtilase family protein
Gh_A13G0001	SBT5	A	A13	-	629	5753	509	55124.6	6.15	Chloroplast	26-101(3.12E-17)		98-339(4.40E-114)				347-477(1.01E-28)					AT1G20160.3	3.06e-151	418	Subtilisin-like serine endopeptidase family protein
Gh_A13G0281	SBT3	A	A13	-	3426743	3430824	778	83782.7	8.46	PlasmaMembrane	30-109(4.83E-23)		106-590(2.74E-137)				353-481(1.10E-25)		671-756(1.67E-28)			AT4G10520.1	0	295	Subtilase family protein
Gh_A12G0209	SBT1	A	A12	+	3139238	3141367	659	71802.3	5.64	PlasmaMembrane			78-529(1.00E-135)					321-423(1.15E-04)	607-652(7.14E-13)			AT2G05920.1	1.03e-162	425	Subtilase family protein
Gh_A12G0221	SBT6	A	A12	+	3327605	3329025	171	18852.9	4.26	PlasmaMembrane				1-171(4.44E-132)								AT5G19660.1	1.25e-107	30	SITE-1 protease
Gh_D06G0164	SBT1	D	D06	+	1670947	1673241	764	82603.7	5.86	PlasmaMembrane	32-117(1.25E-16)		114-573(5.96E-134)				352-468(7.20E-11)		652-757(8.55E-35)		fusolisin superfamily:[537-619(1.19E-01)]	AT1G04110.1	0	543	Subtilase family protein
Gh_D10G0056	SBT2	D	D10	-	437035	440540	841	90488.6	6.28	PlasmaMembrane	76-149(3.68E-12)		149-656(1.48E-118)				395-530(8.06E-14)		743-836(6.11E-17)		AprE:[545-743(1.36E-07)]	AT1G30600.1	0	454	Subtilase family protein
Gh_D06G0158	SBT1	D	D06	-	1609696	1611888	730	79440.8	5.6	PlasmaMembrane	4-82(3.24E-12)		79-539(1.29E-130)	370-539(2.61E-08)					618-723(5.07E-36)		Phage_capsid superfamily:[548-655(1.25E-01)]	AT5G67360.1	0	319	Subtilase family protein
Gh_D06G1794	SBT4	D	D06	-	57856586	57861644	739	79098.2	6.51	Extracellular	37-112(2.69E-18)		110-567(7.79E-138)				341-464(3.88E-19)		640-737(6.78E-36)			AT5G03620.1	0	474	Subtilisin-like serine endopeptidase family protein
Gh_D06G1795	SBT4	D	D06	-	57865005	57869982	510	54719.4	6.12	Extracellular	2-67(2.76E-09)		66-397(5.71E-122)							470-510(3.44E-06)		AT5G59190.1	4.83e-121	273	subtilase family protein
Gh_A07G0467	SBT1	A	A07	+	6018968	6021226	752	81195.1	5.99	Extracellular	32-95(2.13E-16)		107-571(4.96E-123)				341-459(2.88E-10)		649-749(1.64E-29)		AprE:[477-632(4.78E-09)]	AT3G14240.1	1.48e-180	402	Subtilase family protein
Gh_A11G0092	SBT6	A	A11	-	935978	950333	1311	144923	5.91	Cytoplasmic					39-522(0.00E+00)						TPPII [821-1006(1.97E-82)];Spc7 superfamily:[1070-1213(8.29E-03)];FbpA superfamily:[161-208(2.48E-01)]	AT4G20850.1	0	35	tripeptidyl peptidase ii
Gh_D07G0532	SBT1	D	D07	+	5997514	5999772	752	81108.1	6.12	Extracellular	32-108(2.52E-17)		107-571(5.84E-124)				341-458(2.18E-10)		649-749(9.24E-30)		AprE:[469-632(1.74E-09)]	AT3G14240.1	1.26e-180	402	Subtilase family protein
Gh_A08G2565	SBT4	A	scaffold2273_A08	+	83743	90666	1109	120954	5.96	Nuclear										72-118(2.41E-04)	MOT2 superfamily:[138-318(4.48E-48)];	AT3G46840.1	0	453	Subtilase family protein

## Sheet: G.arboreum
gene ID	class	chr	strand	start position	end position	Amino acid length	Molecular Weight	Theoretical pI	location	Inhibitor_I9	Inhibitor_I9 superfamily	Peptidases_S8_3	Peptidases_S8_S53 superfamily	Peptidases_S8_Tripeptidyl_Aminopeptidase_II	Peptidases_S8_SKI-1_like	PA_subtilisin_like	PA superfamily	fn3_6	fn3_6 superfamily	other domain	arabidopsis thaliana ID	E-Value	score	annotation
Cotton_A_13261	SBT2	chr6	+	16171173	16171704	95	10809.2	6.83	Mitochondrial		66-94(4.36E-01)										AT2G19170.1	8.56e-07	47.8	subtilisin-like serine protease 3
Cotton_A_10230	SBT2	chr9	-	62868094	62871606	812	87264.9	6.14	PlasmaMembrane	31-120(7.86E-16)		120-627(3.83E-121)				366-501(3.52E-13)		714-807(1.48E-16)		AprE:[516-714(5.56E-07)]	AT1G30600.1	0	1098	Subtilase family protein
Cotton_A_14888	SBT1	chr8	-	31561705	31563936	743	80079.7	5.99	PlasmaMembrane	11-96(1.07E-16)		93-552(1.88E-134)				331-447(1.36E-11)		631-736(1.17E-33)		AprE:[458-608(1.63E-07)]	AT5G67360.1	0	567	Subtilase family protein
Cotton_A_03725	SBT5	chr4	-	52439482	52444129	768	82814.6	8.72	PlasmaMembrane	27-112(3.80E-17)		110-592(9.84E-138)				357-487(1.61E-32)		670-765(7.69E-39)			AT3G14067.1	0	575	Subtilase family protein
Cotton_A_26289	SBT5	chr11	-	81672121	81675473	709	75889.7	7.15	PlasmaMembrane	13-58(6.75E-09)		56-529(1.59E-133)				299-427(7.19E-23)		609-702(4.11E-35)			AT5G67360.1	0	543	Subtilase family protein
Cotton_A_19912	SBT1	chr1	-	90428793	90431051	752	81214.1	6.02	Extracellular	32-95(1.89E-16)		107-571(8.79E-124)				341-459(3.03E-10)		649-749(6.20E-30)		fusolisin superfamily:[535-617(1.05E-03)]	AT5G67360.1	0	535	Subtilase family protein
Cotton_A_13434	SBT4	chr11	+	75961819	75964776	711	76863.4	9.05	PlasmaMembrane	12-75(2.17E-12)		74-531(1.70E-132)				304-428(3.32E-15)		606-706(3.06E-25)			AT5G03620.1	0	842	Subtilisin-like serine endopeptidase family protein
Cotton_A_26116	SBT4	chr7	-	121998478	121999672	278	29186.8	5.08	Extracellular				3-175(1.05E-65)			184-262(3.76E-12)					AT5G59090.2	1.11e-87	276	subtilase 4.12
Cotton_A_31275	SBT1	chr2	+	55840899	55841375	158	16397.5	5.22	Extracellular				78-152(1.37E-26)			1-47(8.12E-09)					AT4G34980.1	5.65e-72	231	subtilisin-like serine protease 2
Cotton_A_13497	SBT4	chr10	-	97281814	97284384	682	73356.3	5.93	Extracellular	13-54(1.11E-12)		51-507(1.08E-132)				281-404(3.66E-20)		580-676(2.42E-36)			AT5G67360.1	0	548	Subtilase family protein
Cotton_A_28587	SBT1	chr1	-	116620695	116622992	765	82825	9.19	PlasmaMembrane	26-107(7.70E-21)		104-579(8.72E-145)				348-474(3.59E-33)		660-762(6.40E-35)			AT1G01900.1	0	615	subtilase family protein
Cotton_A_02434	SBT6	chr11	-	21468469	21482191	1310	144833	5.87	Cytoplasmic					39-521(0.00E+00)						TPPII :[820-1005(3.80E-82)];Spc7 superfamily:1069-1212(8.73E-05);FbpA superfamily:160-207(2.57E-03);	AT4G20850.1	0	2025	tripeptidyl peptidase ii
Cotton_A_40530	SBT1	chr11	+	96624102	96626438	778	83411.1	8.59	Chloroplast	33-118(5.76E-23)		115-592(4.14E-149)				357-487(2.43E-37)		674-772(6.97E-38)		fusolisin superfamily:[556-637(7.31E-03)]	AT1G01900.1	0	645	subtilase family protein
Cotton_A_03171	SBT1	chr13	+	83335466	83337879	760	80982.1	9.07	Chloroplast	23-100(3.71E-22)		97-576(1.59E-145)				346-469(4.17E-37)		657-754(1.03E-30)		AprE:[476-637(1.16E-07)]	AT1G01900.1	0	611	subtilase family protein
Cotton_A_14510	SBT6	chr3	-	23184639	23189326	1036	115478	5.94	PlasmaMembrane						193-452(0.00E+00)						AT5G19660.1	0	1595	SITE-1 protease
Cotton_A_03377	SBT1	chr12	+	24747011	24749191	726	77860.5	8.14	Chloroplast	11-74(1.46E-08)		73-538(2.69E-144)				311-434(8.72E-34)		622-723(7.05E-28)			AT1G01900.1	0	847	subtilase family protein
Cotton_A_37979	SBT5	chr1	-	72970957	72976569	673	72242.7	9.44	Extracellular	29-114(7.39E-18)		112-591(3.16E-136)				357-488(1.33E-38)		591-670(6.92E-28)			AT2G04160.1	0	854	Subtilisin-like serine endopeptidase family protein
Cotton_A_15053	SBT2	chr10	+	87785388	87791684	847	90775.6	6.71	PlasmaMembrane	99-155(3.60E-12)		155-662(5.09E-122)				401-536(3.58E-13)		749-842(4.60E-20)		AprE:[572-716(1.83E-06)]	AT1G30600.1	0	1148	Subtilase family protein
Cotton_A_13491	SBT4	chr10	-	97381920	97384521	656	70266.2	6.83	PlasmaMembrane	13-54(5.57E-14)		51-481(2.27E-107)				270-393(4.99E-18)		554-650(2.51E-33)			AT5G03620.1	0	548	Subtilisin-like serine endopeptidase family protein
Cotton_A_27395	SBT3	chr13	+	88282962	88285862	660	71100.2	9.1	Mitochondrial	6-85(1.83E-21)		82-479(1.01E-153)						564-655(9.93E-33)			AT4G21650.1	0	631	Subtilase family protein
Cotton_A_20543	SBT5	chr13	-	70859127	70865299	729	78806.6	8.15	Chloroplast	2-77(8.16E-17)		74-548(6.29E-133)				322-443(4.04E-24)		629-726(5.22E-25)			AT1G20160.2	0	632	Subtilisin-like serine endopeptidase family protein
Cotton_A_18889	SBT1	chr4	+	123938469	123940784	771	81739.2	5.93	Extracellular	30-107(8.51E-20)		105-576(1.39E-144)				347-470(1.42E-36)		659-760(1.39E-40)		fusolisin superfamily:[540-618(5.75E-03)]	AT1G01900.1	0	636	subtilase family protein
Cotton_A_03376	SBT1	chr12	+	24740680	24742986	768	82620.9	9.22	Chloroplast	28-114(1.21E-13)		113-583(1.23E-138)				356-479(1.85E-23)		664-765(9.18E-37)			AT1G01900.1	0	758	subtilase family protein
Cotton_A_16655	SBT1	chr10	-	7924596	7926884	762	82463.4	5.63	PlasmaMembrane	30-115(3.24E-15)		112-571(1.69E-137)				350-466(1.04E-08)		650-755(2.43E-36)		AprE:[477-630(2.03E-08)]	AT5G67360.1	0	555	Subtilase family protein
Cotton_A_00534	SBT4	chr2	+	67905152	67905457	101	11251	9.3	Cytoplasmic									9-97(1.74E-19)			AT5G03620.1	6.91e-16	73.9	Subtilisin-like serine endopeptidase family protein
Cotton_A_08666	SBT1	chr10	-	17143006	17145285	759	81197.1	5.79	PlasmaMembrane	28-109(2.48E-18)		106-563(9.93E-130)				345-457(6.63E-13)		643-740(5.14E-31)			AT5G67090.1	0	579	Subtilisin-like serine endopeptidase family protein
Cotton_A_40055	SBT1	chr13	-	58071233	58071592	119	13543	4.62	Nuclear										83-112(2.52E-08)		AT3G14240.1	8.97e-25	99.8	Subtilase family protein
Cotton_A_12899	SBT4	chr9	+	65881071	65884109	743	79513.7	8.95	Chloroplast	40-114(2.11E-17)		113-563(5.72E-126)				341-459(3.04E-20)		636-734(1.51E-33)			AT5G03620.1	0	566	Subtilisin-like serine endopeptidase family protein
Cotton_A_13499	SBT4	chr10	-	97253907	97259527	364	39737.1	6.33	Chloroplast				15-191(7.83E-48)					264-363(3.33E-34)			AT5G59100.1	2.89e-84	271	Subtilisin-like serine endopeptidase family protein
Cotton_A_26123	SBT4	chr7	+	121959454	121962253	474	51954.5	9.25	PlasmaMembrane	31-93(1.61E-10)			165-311(1.38E-31)					385-474(1.71E-18)			AT5G59100.1	2.97e-58	205	Subtilisin-like serine endopeptidase family protein
Cotton_A_09950	SBT1	chr3	-	15006386	15008596	736	77622	5.41	Extracellular	31-109(1.82E-14)		106-556(9.94E-133)				330-455(4.85E-39)		636-733(1.06E-36)			AT1G01900.1	0	572	subtilase family protein
Cotton_A_26117	SBT4	chr7	-	121997298	121998022	190	20653.6	8.38	Chloroplast				1-33(1.15E-14)					107-180(7.92E-15)			AT3G46840.1	3.2e-63	209	Subtilase family protein
Cotton_A_33337	SBT1	chr2	-	18499098	18499361	87	10127.4	6.16	Nuclear		[1-41(1.92E-03)]										AT2G05920.1	1.61e-12	63.9	Subtilase family protein
Cotton_A_03375	SBT1	chr12	+	24731723	24734002	759	81404	7.9	Chloroplast	21-107(1.15E-12)		106-574(8.49E-138)				349-470(8.04E-28)		655-756(3.79E-40)			AT1G01900.1	0	755	subtilase family protein
Cotton_A_18231	SBT5	chr12	+	104990984	104994102	768	81750	5.95	Extracellular	31-106(8.69E-21)		103-581(6.67E-136)				347-477(1.65E-27)		665-762(1.15E-33)		AprE:[486-641(2.09E-09)]	AT5G59100.1	0	539	Subtilisin-like serine endopeptidase family protein
Cotton_A_13191	SBT3	chr6	-	15669670	15672769	776	82529.9	8.31	PlasmaMembrane	34-113(9.36E-20)		110-587(1.13E-142)				364-490(7.16E-30)		669-764(1.26E-34)			AT4G10520.1	0	897	Subtilase family protein
Cotton_A_31277	SBT1	chr2	+	55849139	55850934	200	21176.7	6.82	Chloroplast				1-138(1.87E-57)								AT4G34980.1	3.96e-77	247	subtilisin-like serine protease 2
Cotton_A_07447	SBT5	chr9	-	48421478	48425878	771	82960.5	9.21	Chloroplast	26-111(2.37E-19)		109-590(1.08E-137)				355-486(1.32E-37)		669-768(7.13E-34)		M35_like superfamily:602-647(1.43E-03)	AT1G01900.1	0	541	subtilase family protein
Cotton_A_13493	SBT4	chr10	+	97336809	97337497	229	24669	5.15	PlasmaMembrane				1-74(8.23E-36)					147-229(1.18E-27)		NADB_Rossmann superfamily:50-113(5.49E-03)	AT3G46850.1	1.98e-66	219	Subtilase family protein
Cotton_A_04139	SBT3	chr7	-	77443917	77447994	773	83837.7	7.02	PlasmaMembrane	30-108(7.07E-17)		105-582(5.80E-133)				358-477(1.43E-13)		666-763(1.60E-32)			AT4G10520.1	0	570	Subtilase family protein
Cotton_A_11860	SBT1	chr3	-	22393946	22396209	730	78313	9.42	Chloroplast	2-73(1.14E-17)		70-545(7.82E-149)				315-440(4.39E-37)		626-724(3.54E-33)			AT1G01900.1	0	610	subtilase family protein
Cotton_A_22973	SBT4	chr8	-	124129381	124133746	702	75041.4	7.12	Extracellular	3-73(9.75E-14)		72-527(2.64E-125)				300-423(1.10E-22)		600-697(6.35E-34)			AT3G14240.1	0	547	Subtilase family protein
Cotton_A_30414	SBT4	chr1	+	42085266	42085657	84	9369.17	9.23	Mitochondrial				1-57(1.43E-04)								AT5G03620.1	3.38e-12	62.8	Subtilisin-like serine endopeptidase family protein
Cotton_A_13490	SBT4	chr10	-	97393488	97399269	740	79631.7	5.35	PlasmaMembrane	34-112(2.84E-14)		110-565(8.74E-126)				339-462(2.54E-13)		638-734(1.12E-33)			AT5G03620.1	0	612	Subtilisin-like serine endopeptidase family protein
Cotton_A_28742	SBT2	chr1	+	95730095	95730585	95	10820.3	5.79	Mitochondrial		40-94(1.26E-01)										AT2G19170.1	1.78e-07	49.7	subtilisin-like serine protease 3
Cotton_A_04621	SBT5	chr10	-	19757886	19758629	214	23606.8	9.4	PlasmaMembrane				88-136(2.27E-10)								AT5G59810.1	1.57e-38	142	Subtilase family protein
Cotton_A_40069	SBT3	chr9	-	82417059	82418991	106	11149.4	6.04	Nuclear	23-99(2.72E-16)											AT1G66220.1	1e-14	70.9	Subtilase family protein
Cotton_A_13500	SBT4	chr10	-	97248600	97251041	557	59367.7	6.46	Extracellular	14-55(1.06E-10)		52-443(1.14E-130)					292-339(2.22E-04)	515-557(1.56E-12)			AT5G58840.1	8.22e-169	496	Subtilase family protein
Cotton_A_13496	SBT4	chr10	-	97287670	97289989	621	66204.5	5.49	PlasmaMembrane			14-446(2.52E-120)				220-343(5.25E-20)		519-615(1.29E-36)			AT5G03620.1	0	568	Subtilisin-like serine endopeptidase family protein
Cotton_A_19755	SBT3	chr13	-	63014555	63018631	800	86468.9	8.39	PlasmaMembrane	30-109(1.18E-22)		106-612(1.36E-133)				353-481(1.68E-24)		693-778(5.12E-28)			AT4G10520.1	0	672	Subtilase family protein
Cotton_A_22944	SBT4	chr3	+	94826714	94829437	712	76309.3	9.32	Mitochondrial	1-78(3.93E-20)		76-532(1.23E-132)				306-428(2.41E-17)		608-707(5.93E-29)			AT5G03620.1	0	677	Subtilisin-like serine endopeptidase family protein
Cotton_A_18954	SBT1	chr10	+	15504938	15507256	772	81559.6	8.81	Extracellular	25-103(4.93E-13)		101-580(6.61E-143)				342-461(1.98E-34)		662-766(6.00E-35)			AT1G01900.1	0	592	subtilase family protein
Cotton_A_13495	SBT4	chr10	-	97303928	97306526	682	73164.4	6.11	Extracellular	13-54(5.17E-14)		51-507(1.21E-129)				281-404(2.11E-20)		580-676(1.60E-36)			AT3G14240.1	0	541	Subtilase family protein
Cotton_A_16037	SBT2	chr7	-	67450998	67454262	751	80184.9	8.32	PlasmaMembrane			53-569(2.20E-105)	468-604(1.32E-08)			310-445(3.09E-08)		651-743(2.57E-19)			AT4G30020.1	0	587	PA-domain containing subtilase family protein
Cotton_A_14893	SBT1	chr8	+	31644940	31647132	730	79278.5	5.55	PlasmaMembrane	4-82(2.19E-12)		79-539(3.80E-132)	370-539(2.19E-07)					618-723(2.33E-36)			AT5G67360.1	0	541	Subtilase family protein
Cotton_A_31278	SBT1	chr2	+	55851042	55851518	158	16397.5	5.22	Extracellular				78-152(1.37E-26)			1-47(8.12E-09)					AT4G34980.1	5.65e-72	231	subtilisin-like serine protease 2
Cotton_A_36345	SBT1	chr13	-	105880285	105882570	761	80547.2	6.14	Chloroplast	33-108(5.93E-22)		105-577(3.42E-152)				346-472(1.31E-41)		658-758(1.42E-37)		AprE:[481-638(2.01E-08)]	AT1G01900.1	0	653	subtilase family protein
Cotton_A_11161	SBT6	chr11	+	56426976	56431309	895	100003	5.56	PlasmaMembrane						197-453(0.00E+00)					;YlqF_related_GTPase superfamily:679-711(2.65E-03);	AT5G19660.1	0	1451	SITE-1 protease
Cotton_A_10948	SBT4	chr4	-	104158482	104161765	748	80297	8.93	PlasmaMembrane	37-114(1.63E-17)		111-568(9.69E-130)				343-466(7.96E-14)		644-743(1.58E-29)			AT5G03620.1	0	657	Subtilisin-like serine endopeptidase family protein
Cotton_A_26114	SBT4	chr7	-	122009976	122012524	592	63166.8	6.57	PlasmaMembrane	33-110(2.03E-18)		107-561(9.63E-122)				330-450(6.10E-15)					AT5G59100.1	0	624	Subtilisin-like serine endopeptidase family protein
Cotton_A_22974	SBT4	chr8	-	124119427	124124758	737	79132.5	6.86	Extracellular	35-110(1.59E-17)		108-565(1.42E-137)				339-462(3.19E-20)		638-735(2.70E-34)			AT5G03620.1	0	638	Subtilisin-like serine endopeptidase family protein
Cotton_A_26115	SBT4	chr7	-	121999811	122003629	781	84214.6	8.61	PlasmaMembrane	18-95(2.99E-18)		92-552(1.44E-128)				313-432(4.19E-21)		626-718(8.71E-24)			AT5G59100.1	0	767	Subtilisin-like serine endopeptidase family protein
Cotton_A_35466	SBT6	chr3	-	79263813	79278535	1415	156930	6.79	Cytoplasmic					108-591(0.00E+00)						Spc7 superfamily:1154-1295(4.91E-02);DUF3020 superfamily:[225-238(6.31E-03)];TPPII :[904-1092(3.66E-82)]	AT4G20850.1	0	2038	tripeptidyl peptidase ii
Cotton_A_13488	SBT4	chr10	-	97429121	97429807	163	18525	8.34	PlasmaMembrane	13-54(9.72E-08)			52-119(3.88E-23)								AT5G59090.1	1.76e-32	123	subtilase 4.12
Cotton_A_29458	SBT2	chr8	+	66141144	66144296	825	87957.2	6.33	PlasmaMembrane	60-129(3.44E-10)		134-642(2.22E-102)				379-514(3.56E-09)		725-819(1.02E-15)			AT1G30600.1	0	547	Subtilase family protein
Cotton_A_26615	SBT2	chr3	-	411269	416543	818	87297.5	8	PlasmaMembrane	61-128(2.44E-16)		131-634(1.21E-120)				379-515(5.70E-15)		720-813(1.46E-21)		T7SS_mycosin superfamily:[523-675(2.73E-10)]	AT1G30600.1	0	639	Subtilase family protein
Cotton_A_08556	SBT1	chr9	+	64562843	64565161	772	81719.1	8.83	Extracellular	25-103(1.98E-15)		102-580(3.04E-144)				342-475(4.57E-37)		662-766(4.95E-31)			AT1G01900.1	0	605	subtilase family protein
Cotton_A_10921	SBT1	chr4	+	103889430	103891700	756	80080	7.22	PlasmaMembrane	30-105(1.86E-21)		102-574(3.30E-139)				342-469(4.04E-38)		655-752(1.26E-33)		AprE:[480-631(2.96E-11)]	AT1G01900.1	0	629	subtilase family protein
Cotton_A_09963	SBT4	chr3	+	14727460	14730771	778	83736.1	5.49	Extracellular	33-110(8.47E-21)		107-563(5.14E-133)				337-459(1.76E-21)		636-736(3.99E-34)			AT3G14240.1	0	542	Subtilase family protein
Cotton_A_09951	SBT1	chr3	-	15003338	15005602	754	80899.2	5.98	Chloroplast	38-119(6.13E-12)		118-573(2.84E-124)				347-474(3.72E-39)		655-751(7.95E-39)			AT1G01900.1	0	540	subtilase family protein
Cotton_A_13498	SBT4	chr10	-	97261405	97265859	698	74576.1	5.21	PlasmaMembrane	3-72(8.78E-12)		69-524(1.15E-128)				299-422(5.47E-22)		596-692(3.32E-33)			AT5G67360.1	0	543	Subtilase family protein
Cotton_A_10766	SBT1	chr6	+	65680656	65682959	767	83207.9	5.49	PlasmaMembrane	31-110(1.02E-12)		108-578(8.48E-130)				351-473(1.48E-12)		657-762(1.35E-26)			AT5G67360.1	0	556	Subtilase family protein
Cotton_A_24355	SBT1	chr13	-	20123692	20125832	696	75518.6	7.23	Chloroplast	9-63(3.93E-06)		60-519(1.21E-123)				301-413(1.24E-10)		597-691(1.84E-25)			AT5G67090.1	0	653	Subtilisin-like serine endopeptidase family protein
Cotton_A_06799	SBT5	chr3	+	52786034	52788992	717	76568.2	8.99	Chloroplast			75-538(2.11E-117)				303-434(4.95E-36)		617-714(3.36E-42)			AT5G67360.1	0	565	Subtilase family protein
Cotton_A_31274	SBT1	chr2	+	55838996	55840791	200	21176.7	6.82	Chloroplast				1-138(1.87E-57)								AT4G34980.1	3.96e-77	247	subtilisin-like serine protease 2
Cotton_A_16445	SBT5	chr8	+	83895809	83898879	773	82522.3	5.73	Extracellular	34-108(8.08E-16)		105-581(1.87E-104)				342-473(1.93E-24)		665-762(5.22E-30)		AprE:[455-641(3.54E-10)]	AT1G20160.2	0	843	Subtilisin-like serine endopeptidase family protein
Cotton_A_20331	SBT3	chr12	+	136949051	136955382	795	85501.1	6.26	PlasmaMembrane	40-119(1.86E-21)		116-609(1.20E-130)				370-493(4.33E-22)		691-786(2.77E-36)			AT4G10520.1	0	826	Subtilase family protein
Cotton_A_35816	SBT1	chr10	-	20982523	20984829	768	80785.5	6.55	PlasmaMembrane	34-109(2.92E-17)		106-578(3.21E-136)				346-473(6.21E-40)		659-764(7.41E-31)		AprE:[484-680(4.35E-10)]	AT1G01900.1	0	614	subtilase family protein
Cotton_A_08667	SBT1	chr10	+	17146751	17149003	750	80969.8	5.46	Extracellular	33-98(4.51E-17)		110-571(1.37E-130)				344-454(1.63E-11)		649-747(8.59E-24)		AprE:[469-632(2.71E-09)]	AT5G67360.1	0	535	Subtilase family protein
Cotton_A_37120	SBT1	chr8	+	16586367	16587045	197	20511.2	8.83	Chloroplast				1-138(7.24E-56)				170-197(2.44E-02)				AT4G34980.1	4.34e-86	270	subtilisin-like serine protease 2
Cotton_A_02647	SBT1	chr10	+	49900395	49902701	768	81352	6.26	Extracellular	27-104(1.39E-19)		102-573(3.01E-133)				346-467(1.75E-33)		656-758(9.56E-38)		AprE:[474-630(4.44E-09)]	AT1G01900.1	0	608	subtilase family protein
Cotton_A_31279	SBT1	chr2	+	55851703	55852065	120	13249.6	10.14	Chloroplast									8-114(9.71E-25)			AT4G34980.1	6.4e-34	125	subtilisin-like serine protease 2
Cotton_A_13489	SBT4	chr10	-	97401292	97406174	682	73157.2	5.35	PlasmaMembrane	13-54(6.17E-15)		52-507(2.41E-126)				281-404(2.82E-13)		580-676(9.92E-34)			AT5G03620.1	0	611	Subtilisin-like serine endopeptidase family protein
Cotton_A_03979	SBT5	chr9	-	62299752	62302610	747	80716.2	6.61	Extracellular	1-76(2.45E-21)		82-571(5.09E-127)				339-467(7.82E-31)		647-744(2.11E-23)			AT5G67360.1	0	546	Subtilase family protein
Cotton_A_26124	SBT4	chr7	+	121956086	121959058	728	78045.7	8.72	PlasmaMembrane	33-110(5.41E-19)		107-546(4.56E-130)				330-449(3.20E-19)		620-718(2.28E-31)			AT5G03620.1	0	566	Subtilisin-like serine endopeptidase family protein
Cotton_A_10767	SBT1	chr6	+	65688427	65690331	568	61259.6	6.09	Chloroplast				42-380(2.33E-91)				190-274(3.60E-04)	458-563(2.03E-29)			AT4G34980.1	9.13e-129	395	subtilisin-like serine protease 2
Cotton_A_23202	SBT2	chr10	-	31318982	31319513	95	10809.2	6.83	Mitochondrial		66-94(4.36E-01)										AT2G19170.1	8.56e-07	47.8	subtilisin-like serine protease 3
Cotton_A_31276	SBT1	chr2	+	55841560	55844770	283	31695.7	9.28	Chloroplast									8-114(2.45E-26)		PLN03216:143-282(3.05E-109);hofQ superfamily:[116-155(1.02E-03)];	AT4G34980.1	1.77e-32	127	subtilisin-like serine protease 2
Cotton_A_13494	SBT4	chr10	-	97328410	97336345	423	47190.4	6.28	Nuclear							237-351(1.21E-10)			338-423(8.46E-08)	NAM:26-147(1.38E-42)	AT3G46850.1	8.57e-25	107	Subtilase family protein

## Sheet: G.raimondii
gene ID	protein ID	class	chr	strand	start position	end position	Amino acid length	Molecular Weight	Theoretical pI	location	Inhibitor_I9	Inhibitor_I9 superfamily	Peptidases_S8_3	Peptidases_S8_S53 superfamily	Peptidases_S8_Tripeptidyl_Aminopeptidase_II	Peptidases_S8_SKI-1_like	PA_subtilisin_like	PA superfamily	fn3_6	fn3_6 superfamily	other domain	arabidopsis thaliana ID	E-Value	score	annotation
Gorai.N019700	Gorai.N019700.1	SBT1	scaffold_257	-	7927	8717	256	27683.2	5.03	PlasmaMembrane				27-66(7.15E-20)					145-250(2.01E-31)			AT3G14240.1	5.3e-51	179	Subtilase family protein
Gorai.N019600	Gorai.N019600.1	SBT1	scaffold_257	-	3	1520	506	54914.1	5.57	Vacuole	31-110(9.24E-14)		108-343(2.17E-117)				351-475(2.70E-17)					AT5G67360.1	6.45e-129	394	Subtilase family protein
Gorai.013G257400	Gorai.013G257400.1	SBT4	Chr13	+	57329441	57331573	460	51635.3	5.93	Cytoplasmic				22-387(2.91E-17)								AT5G03620.1	1.66e-36	144	Subtilisin-like serine endopeptidase family protein
Gorai.013G223900	Gorai.013G223900.1	SBT1	Chr13	-	54355796	54358890	761	80719.7	8.86	Chloroplast	23-100(2.19E-23)		97-576(8.74E-146)				346-469(2.77E-37)		657-754(8.36E-32)		AprE:[476-637(1.38E-07)]	AT2G05920.1	0	1147	Subtilase family protein
Gorai.013G140200	Gorai.013G140200.1	SBT3	Chr13	+	37748185	37750628	127	13431.3	6.04	Extracellular	43-119(5.38E-18)											AT1G66220.1	9.23e-15	72.4	Subtilase family protein
Gorai.013G033000	Gorai.013G033000.9	SBT3	Chr13	-	2504551	2509315	584	62804	7.27	PlasmaMembrane	30-109(4.01E-23)		106-346(7.96E-119)				353-481(6.86E-26)					AT1G32940.3	1.19e-160	473	Subtilase family protein
	Gorai.013G033000.8	SBT3	Chr13	-	2504551	2509315	629	66551.6	6.73	Extracellular	30-109(3.77E-23)		106-590(2.27E-135)				353-481(5.64E-25)					AT1G32940.1	0	587	Subtilase family protein
	Gorai.013G033000.7	SBT3	Chr13	-	2504551	2509315	766	82304.2	8.56	PlasmaMembrane	30-109(4.66E-23)		106-590(8.22E-137)				353-481(2.26E-25)		671-733(2.83E-20)		AprE:[493-652(1.77E-06)]	AT4G10550.3	0	684	Subtilase family protein
	Gorai.013G033000.6	SBT3	Chr13	-	2504504	2509483	721	77614.9	9.02	PlasmaMembrane	10-51(3.46E-07)		48-532(4.54E-138)				295-423(2.34E-25)		613-698(3.40E-28)		AprE:[435-594(2.13E-06)]	AT4G10550.1	0	635	Subtilase family protein
	Gorai.013G033000.5	SBT3	Chr13	-	2504504	2509483	733	79124.8	9.01	PlasmaMembrane	22-63(3.52E-07)		60-544(3.11E-138)				307-435(1.88E-25)		625-710(3.00E-28)		AprE:[447-606(1.70E-06)]	AT4G10550.1	0	635	Subtilase family protein
	Gorai.013G033000.4	SBT3	Chr13	-	2504504	2509483	733	78671.9	8.94	PlasmaMembrane	10-63(2.39E-15)		60-544(2.04E-137)				307-435(2.96E-25)		625-710(3.68E-28)		AprE:[447-606(2.92E-06)]	AT4G10550.1	0	664	Subtilase family protein
	Gorai.013G033000.3	SBT3	Chr13	-	2504504	2509483	745	80038.3	8.69	PlasmaMembrane	2-75(5.76E-19)		72-556(8.96E-138)				319-447(1.97E-25)		637-722(2.28E-28)		AprE:[459-618(2.31E-06)]	AT4G10550.1	0	689	Subtilase family protein
	Gorai.013G033000.2	SBT3	Chr13	-	2504504	2509483	779	83698.7	8.63	PlasmaMembrane	30-109(4.75E-23)		106-590(6.40E-137)				353-481(2.90E-25)		671-756(3.65E-28)		AprE:[493-652(2.76E-06)]	AT4G10550.1	0	699	Subtilase family protein
	Gorai.013G033000.1	SBT3	Chr13	-	2504551	2509315	787	84569.7	8.55	PlasmaMembrane	30-117(1.78E-20)		114-598(1.24E-136)				361-489(3.17E-25)		679-764(3.72E-28)		AprE:[501-660(3.38E-06)]	AT4G10550.1	0	691	Subtilase family protein
Gorai.013G001600	Gorai.013G001600.3	SBT5	Chr13	-	110818	117095	629	67264	8.82	Mitochondrial			1-447(2.23E-118)				212-342(1.71E-26)		528-625(9.07E-27)		AprE:[353-507(2.94E-07)]	AT1G20160.2	0	566	Subtilisin-like serine endopeptidase family protein
	Gorai.013G001600.2	SBT5	Chr13	-	110786	117292	549	59427.8	7.21	Chloroplast	62-137(1.29E-16)		134-374(6.20E-116)				382-512(1.16E-27)				7tm_GPCRs superfamily:[13-58(8.90E-03)]	AT1G20160.3	6.78e-150	442	Subtilisin-like serine endopeptidase family protein
	Gorai.013G001600.1	SBT5	Chr13	-	110786	117292	799	86244.6	8.56	PlasmaMembrane	62-137(2.75E-16)		134-617(7.66E-131)				382-512(5.28E-27)		698-795(5.69E-27)		AprE:[523-677(9.94E-08)]	AT1G20160.1	0	645	Subtilisin-like serine endopeptidase family protein
Gorai.012G000900	Gorai.012G000900.1	SBT3	Chr12	+	104320	110746	779	83738.2	6.21	PlasmaMembrane	42-121(3.75E-21)		118-591(3.51E-133)				372-495(8.88E-23)		674-769(7.54E-35)			AT1G32960.1	0	859	Subtilase family protein
Gorai.011G272500	Gorai.011G272500.1	SBT4	Chr11	+	60443527	60447250	741	79401.6	5.66	PlasmaMembrane	33-109(2.24E-15)		106-561(4.89E-128)				336-457(8.70E-19)		633-734(1.58E-33)		AprE:[471-643(5.55E-07)]	AT5G59190.1	0	657	subtilase family protein
Gorai.011G272400	Gorai.011G272400.1	SBT4	Chr11	+	60437574	60441631	743	80250.3	6.05	PlasmaMembrane	35-111(5.47E-19)		108-542(2.15E-125)				338-440(3.48E-15)		642-741(1.21E-34)			AT5G59190.1	0	664	subtilase family protein
Gorai.011G272300	Gorai.011G272300.1	SBT4	Chr11	+	60431663	60436514	714	76354.2	5.27	PlasmaMembrane	11-87(3.23E-17)		84-539(9.31E-130)				314-437(5.30E-22)		611-707(3.31E-34)		AprE:[416-608(4.66E-06)]	AT5G59190.1	0	682	subtilase family protein
Gorai.011G272200	Gorai.011G272200.1	SBT4	Chr11	+	60423855	60427184	727	78257.1	6.29	Extracellular	34-112(2.27E-21)		109-565(7.83E-132)				339-462(4.27E-21)		638-727(8.23E-33)			AT3G46850.1	0	671	Subtilase family protein
Gorai.011G272100	Gorai.011G272100.1	SBT4	Chr11	+	60417984	60421396	752	80671.1	7.52	PlasmaMembrane	48-126(6.49E-23)		123-579(7.38E-128)				353-476(3.98E-21)		652-748(2.10E-35)			AT3G46850.1	0	672	Subtilase family protein
Gorai.011G272000	Gorai.011G272000.1	SBT4	Chr11	+	60408870	60416272	778	84318.4	6.15	PlasmaMembrane	34-112(3.03E-23)		110-553(3.10E-126)				339-450(5.99E-11)		626-722(1.82E-37)			AT3G46850.1	0	649	Subtilase family protein
Gorai.011G157200	Gorai.011G157200.1	SBT4	Chr11	+	27553741	27559261	569	65249.5	8.63	Nuclear				69-197(6.09E-12)						442-544(2.24E-09)	Retrotran_gag_2 superfamily:[202-311(6.16E-23)]	AT5G03620.2	4.63e-09	60.5	Subtilisin-like serine endopeptidase family protein
Gorai.011G157100	Gorai.011G157100.1	SBT4	Chr11	+	27520013	27520448	77	8541.16	10.35	Mitochondrial				19-73(1.48E-11)								AT5G59190.1	1.21e-07	50.4	subtilase family protein
Gorai.011G061400	Gorai.011G061400.1	SBT1	Chr11	-	5003379	5005688	765	80962.4	5.96	Extracellular	28-95(1.84E-14)		98-569(9.40E-145)				340-463(1.41E-36)		652-753(4.18E-41)			AT3G14067.1	0	1035	Subtilase family protein
Gorai.011G056000	Gorai.011G056000.1	SBT1	Chr11	+	4406203	4409505	773	81413.5	8.47	Extracellular	25-103(1.98E-15)		102-580(1.48E-143)				342-475(1.84E-37)		662-766(7.32E-31)			AT3G14240.1	0	1221	Subtilase family protein
Gorai.011G035300	Gorai.011G035300.1	SBT5	Chr11	-	2643061	2646076	773	83724.1	6.72	Extracellular	26-101(6.32E-22)		107-596(3.20E-128)				364-492(1.29E-30)		672-769(7.97E-24)			AT5G45650.1	0	821	subtilase family protein
Gorai.011G006000	Gorai.011G006000.3	SBT2	Chr11	-	484983	488637	520	56151.9	7.63	PlasmaMembrane	55-137(8.37E-13)		137-401(1.53E-111)				383-505(5.21E-10)					AT4G20430.1	0	751	Subtilase family protein
	Gorai.011G006000.2	SBT2	Chr11	-	484983	488637	603	64930.5	6.5	PlasmaMembrane	55-137(1.06E-12)		137-401(5.27E-110)	532-595(6.96E-01)			383-518(3.99E-13)					AT4G20430.1	0	890	Subtilase family protein
	Gorai.011G006000.1	SBT2	Chr11	-	484983	488829	830	89092.9	6.41	PlasmaMembrane	55-137(1.15E-12)		137-644(1.64E-119)				383-518(7.03E-13)		731-824(1.97E-17)		AprE:[533-731(2.03E-07)]	AT4G20430.1	0	1196	Subtilase family protein
Gorai.011G000100(Query frame = -3)	Gorai.011G000100.6	SBT6	Chr11	-	7390	10249	185	23662.2	10.06	PlasmaMembrane				185-207(1.22361e-07)								AT5G19660.1	2e-109	241	SITE-1 protease
	Gorai.011G000100.5	SBT6	Chr11	-	7390	10249	191	22156.5	10.15	PlasmaMembrane				171-193(9.7867e-08)								AT5G19660.1	2e-109	241	SITE-1 protease
	Gorai.011G000100.4	SBT6	Chr11	-	7390	10249	215	27281.2	10.08	PlasmaMembrane				215-237(1.82128e-07)								AT5G19660.1	2e-109	241	SITE-1 protease
	Gorai.011G000100.3	SBT6	Chr11	-	7390	10249	221	25775.5	10.15	PlasmaMembrane				201-223(1.53222e-07)								AT5G19660.1	2e-109	241	SITE-1 protease
	Gorai.011G000100.2	SBT6	Chr11	-	3529	10249	253	38254.2	10.01	PlasmaMembrane				313-355(3.96713e-07)								AT5G19660.1	2e-109	241	SITE-1 protease
	Gorai.011G000100.1	SBT6	Chr11	-	3378	10249	338	37650	9.9	PlasmaMembrane				303-325(3.75121e-07)								AT5G19660.1	2e-109	241	SITE-1 protease
Gorai.010G200300	Gorai.010G200300.1	SBT4	Chr10	-	56218968	56223353	708	75524	6.6	Extracellular	1-78(1.81E-16)		77-532(3.62E-124)				305-428(1.20E-21)		605-702(6.30E-29)			AT5G59100.1	0	660	Subtilisin-like serine endopeptidase family protein
Gorai.010G200200	Gorai.010G200200.1	SBT4	Chr10	-	56202582	56206488	531	56627.8	5.77	PlasmaMembrane		[12-37(2.05E-04)]		38-358(3.09E-59)			132-255(1.04E-19)		431-528(1.33E-34)			AT3G46850.1	3.14e-149	446	Subtilase family protein
Gorai.010G200100	Gorai.010G200100.1	SBT4	Chr10	-	56189920	56190686	201	21779.6	9.51	Extracellular				6-25(8.48E-05)					98-195(4.06E-32)			AT3G46840.1	4.11e-51	177	Subtilase family protein
Gorai.010G200000	Gorai.010G200000.1	SBT4	Chr10	-	56158050	56159516	371	39964.8	5.43	Extracellular			14-237(1.12E-112)				245-363(1.00E-15)					AT4G00230.2	8.5e-120	360	xylem serine peptidase 1
Gorai.010G199900	Gorai.010G199900.2	SBT4	Chr10	-	56133321	56139040	536	57346.7	6.01	Extracellular	35-110(2.62E-19)		108-504(7.18E-132)									AT4G00230.1	1.67e-162	481	xylem serine peptidase 1
	Gorai.010G199900.1	SBT4	Chr10	-	56133321	56139040	565	60220.9	6.02	Extracellular	35-110(2.79E-19)		108-533(3.18E-145)				350-430(3.67E-13)					AT4G00230.1	0	535	xylem serine peptidase 1
Gorai.010G183500	Gorai.010G183500.2	SBT2	Chr10	-	53284770	53289685	777	82911.4	6.04	PlasmaMembrane	9-85(7.11E-12)		83-593(3.91E-105)				330-465(1.46E-09)		676-770(9.92E-16)			AT1G62340.1	0	998	PA-domain containing subtilase family protein
	Gorai.010G183500.1	SBT2	Chr10	-	53284770	53289685	826	87957.1	5.87	PlasmaMembrane	60-134(9.04E-12)		132-642(1.43E-104)				379-514(1.55E-09)		725-819(9.60E-16)			AT1G62340.1	0	1013	PA-domain containing subtilase family protein
Gorai.010G183400 (query = -3)	Gorai.010G183400.6	SBT2	Chr10	+	53281268	53287438	569	144964	9.16	Extracellular				63-134(5.76126e-32)							GT2 superfamily:[135-185(0.601864)]	AT1G62340.1	1e-11	63.9	PA-domain containing subtilase family protein
	Gorai.010G183400.5	SBT2	Chr10	+	53281268	53287438	569	140221	9.05	Extracellular				63-134(5.76126e-32)							GT2 superfamily:[135-185(0.601864)]	AT1G62340.1	1e-11	63.9	PA-domain containing subtilase family protein
	Gorai.010G183400.4	SBT2	Chr10	+	53281268	53287438	609	140637	9.13	Extracellular				63-134(5.76126e-32)							GT2 superfamily:[135-185(0.601864)]	AT1G62340.1	1e-11	63.9	PA-domain containing subtilase family protein
	Gorai.010G183400.3	SBT2	Chr10	+	53281268	53287438	652	136425	9.25	PlasmaMembrane				63-134(5.76126e-32)							GT2 superfamily:[135-185(0.601864)]	AT1G62340.1	1e-11	63.9	PA-domain containing subtilase family protein
	Gorai.010G183400.2	SBT2	Chr10	+	53281268	53287438	673	139765	9.04	Extracellular				63-134(5.76126e-32)							GT2 superfamily:[135-185(0.601864)]	AT1G62340.1	1e-11	63.9	PA-domain containing subtilase family protein
	Gorai.010G183400.1	SBT2	Chr10	+	53281059	53287438	711	143665	9.09	PlasmaMembrane				63-134(5.76126e-32)							GT2 superfamily:[135-185(0.601864)]	AT1G62340.1	1e-11	63.9	PA-domain containing subtilase family protein
Gorai.010G163700	Gorai.010G163700.3	SBT5	Chr10	+	47293486	47301356	699	73972.8	9.09	Chloroplast			26-520(6.13E-138)				288-414(1.10E-38)		597-695(8.93E-28)			AT5G45650.1	0	841	subtilase family protein
	Gorai.010G163700.2	SBT5	Chr10	+	47293227	47301391	689	72871.5	9.09	Chloroplast			16-510(6.22E-138)				278-404(1.18E-38)		587-685(8.85E-28)		AprE:[421-570(4.94E-07)]	AT5G45650.1	0	841	subtilase family protein
	Gorai.010G163700.1	SBT5	Chr10	+	47293227	47301388	780	82977.2	9	Chloroplast	26-102(2.87E-22)		107-601(7.49E-139)				369-495(9.50E-39)		678-776(8.26E-28)			AT5G45650.1	0	944	subtilase family protein
Gorai.010G046400	Gorai.010G046400.1	SBT4	Chr10	-	4995745	4997324	348	38410.4	8.76	Cytoplasmic				22-156(9.11E-08)								AT3G46850.1	5.33e-14	75.1	Subtilase family protein
Gorai.010G021600	Gorai.010G021600.1	SBT1	Chr10	+	1700309	1703057	765	82616.8	5.77	PlasmaMembrane	32-117(1.34E-16)		114-573(2.00E-134)				352-468(7.28E-11)		652-757(3.85E-34)		fusolisin superfamily:537-619(1.12E-03)	AT5G67090.1	0	640	Subtilisin-like serine endopeptidase family protein
Gorai.010G021100	Gorai.010G021100.1	SBT1	Chr10	-	1650501	1652247	565	61719.9	5.66	PlasmaMembrane	32-116(3.73E-14)		113-360(2.33E-109)	465-528(1.01E-04)			334-451(3.27E-06)					AT5G67090.1	2.26e-145	437	Subtilisin-like serine endopeptidase family protein
Gorai.010G002100	Gorai.010G002100.1(Query frame= -1)	SBT5	Chr10	-	80228	81920	159	57323.6	9.77	Cytoplasmic										fn3_6:87-184(-1.41E-35)		AT1G20160.2	7e-63	219	Subtilisin-like serine endopeptidase family protein
Gorai.010G002000	Gorai.010G002000.2	SBT5	Chr10	+	77654	81277	562	59006.5	6.1	Extracellular				3-374(7.38E-88)			140-270(5.95E-27)		458-555(1.06E-34)		AprE:[279-434(1.14E-08)]	AT1G20160.2	0	733	Subtilisin-like serine endopeptidase family protein
	Gorai.010G002000.1	SBT5	Chr10	+	77654	81277	769	81785.1	6.34	Extracellular	31-106(9.78E-21)		103-581(6.08E-134)				347-477(1.04E-27)		665-762(9.91E-35)		AprE:[486-641(1.60E-09)]	AT1G20160.1	0	947	Subtilisin-like serine endopeptidase family protein
Gorai.009G453100	Gorai.009G453100.1	SBT5	Chr09	+	70422818	70427546	775	83342.1	9.3	Mitochondrial	29-114(3.63E-20)		112-593(7.28E-140)				358-489(3.45E-38)		672-771(4.03E-33)		0	AT5G59810.1	0	978	Subtilase family protein
Gorai.009G275900	Gorai.009G275900.1	SBT1	Chr09	-	23121917	23124202	747	80816.5	5.63	PlasmaMembrane	30-100(6.50E-06)		97-556(8.76E-134)				335-451(6.40E-09)		634-739(1.29E-37)		AprE:[462-615(1.40E-08)]	AT5G67090.1	0	610	Subtilisin-like serine endopeptidase family protein
Gorai.009G218000	Gorai.009G218000.1	SBT1	Chr09	-	16949159	16951992	769	80857.6	6.36	PlasmaMembrane	34-109(1.37E-18)		106-578(1.46E-137)				346-473(1.30E-39)		659-764(3.00E-31)		AprE:[484-680(3.54E-10)]	AT5G67360.1	0	993	Subtilase family protein
Gorai.009G213600	Gorai.009G213600.1	SBT1	Chr09	+	16579961	16582213	735	79223.9	5.64	PlasmaMembrane	33-111(1.38E-17)		110-555(2.52E-132)				344-438(9.63E-08)		633-731(8.16E-24)		0	AT5G67360.1	6.84e-180	533	Subtilase family protein
Gorai.009G213500	Gorai.009G213500.1	SBT1	Chr09	-	16576216	16578495	760	81100.9	5.71	PlasmaMembrane	28-109(2.79E-18)		106-563(4.86E-129)				345-457(1.68E-13)		643-740(4.47E-30)		0	AT5G67090.1	0	582	Subtilisin-like serine endopeptidase family protein
Gorai.009G213400	Gorai.009G213400.1	SBT1	Chr09	-	16574122	16575107	282	30343	8.9	Mitochondrial				134-208(2.75E-27)							AprE superfamily:[87-245(1.98E-04)];RGS superfamily:[48-97(5.71E-03)]	AT2G05920.1	8.56e-53	185	Subtilase family protein
Gorai.009G192600	Gorai.009G192600.1	SBT5	Chr09	+	14815640	14819667	777	82604.3	6.11	Extracellular	34-109(1.42E-20)		106-577(1.68E-112)				343-474(1.05E-25)		662-763(5.10E-30)		0	AT1G20160.1	0	904	Subtilisin-like serine endopeptidase family protein
Gorai.009G147400	Gorai.009G147400.2	SBT1	Chr09	-	11192425	11195929	750	78919.7	9.03	Extracellular	33-80(4.68E-06)		78-557(2.22E-141)				319-438(1.66E-34)		639-743(5.89E-35)		0	AT3G14240.1	0	1146	Subtilase family protein
	Gorai.009G147400.1	SBT1	Chr09	-	11192425	11195929	773	81507.6	8.94	Extracellular	25-103(8.60E-12)		101-580(2.20E-141)				342-461(1.16E-34)		662-766(6.19E-35)		0	AT3G14240.1	0	1170	Subtilase family protein
Gorai.009G146000	Gorai.009G146000.1	SBT1	Chr09	+	11092751	11095549	769	81411.2	6.26	Extracellular	27-104(2.03E-20)		102-573(1.10E-131)				344-467(4.14E-33)		656-758(6.23E-38)		AprE:[474-630(2.47E-09)]	AT3G14067.1	0	1035	Subtilase family protein
Gorai.009G116500	Gorai.009G116500.1	SBT2	Chr09	-	8545987	8552966	848	90802.8	6.81	PlasmaMembrane	99-155(4.56E-12)		155-662(1.54E-122)				401-536(2.58E-13)		749-842(3.48E-20)		AprE:[551-716(1.24E-06)]	AT4G20430.1	0	1234	Subtilase family protein
Gorai.009G095600	Gorai.009G095600.1	SBT4	Chr09	-	6948833	6951947	718	76585.3	8.92	Chloroplast	42-88(1.31E-12)		87-537(3.88E-125)				315-433(8.35E-20)		610-708(1.15E-33)			AT5G59120.1	0	743	subtilase 4.13
Gorai.009G025200	Gorai.009G025200.4	SBT6	Chr09	-	1953665	1956380	646	72458.5	7.05	PlasmaMembrane				1-60(7.42E-23)							YlqF_related_GTPase superfamily:[286-318(6.10E-02)];AKR_SF superfamily:[110-145(1.60E-03)];	AT5G19660.1	0	1033	SITE-1 protease
	Gorai.009G025200.3	SBT6	Chr09	-	1953665	1958839	805	90100	6.25	PlasmaMembrane				43-219(3.94E-121)							YlqF_related_GTPase superfamily:[445-477(8.61E-02)]	AT5G19660.2	0	1288	SITE-1 protease
	Gorai.009G025200.2	SBT6	Chr09	-	1953605	1959098	805	90100	6.25	PlasmaMembrane				43-219(3.94E-121)							YlqF_related_GTPase superfamily:[445-477(8.61E-02)]	AT5G19660.2	0	1288	SITE-1 protease
	Gorai.009G025200.1	SBT6	Chr09	-	1953605	1959098	1039	116572	6.63	PlasmaMembrane				0	197-453(0.00E+00)						YlqF_related_GTPase superfamily:[679-711(9.88E-02)];	AT5G19660.1	0	1601	SITE-1 protease
Gorai.008G260600	Gorai.008G260600.1（Query frame = -3）	SBT3	Chr08	-	54163969	54166503	369	80729.8	9.67	Cytoplasmic									fn3_6:48-143(-5.20905E-37)			AT4G10550.4	2e-43	168	Subtilase family protein
Gorai.008G260500	Gorai.008G260500.1	SBT3	Chr08	+	54160819	54164468	823	87822	7.6	PlasmaMembrane	80-159(4.01E-21)		156-633(1.27E-143)				412-536(3.43E-28)		715-810(3.49E-35)			AT4G10540.1	0	948	Subtilase family protein
Gorai.008G253500	Gorai.008G253500.2	SBT2	Chr08	-	53685415	53686197	82	9171.33	5.85	Nuclear		[52-80(3.70E-01)];									XPF_nuclease-like superfamily:[10-81(4.42E-03)]	AT2G19170.1	8.5e-07	48.5	subtilisin-like serine protease 3
	Gorai.008G253500.1	SBT2	Chr08	-	53685252	53686277	96	10810.2	6.27	Nuclear		[66-94(4.84E-01)]										AT2G19170.1	2.07e-06	47.8	subtilisin-like serine protease 3
Gorai.008G115600	Gorai.008G115600.1	SBT1	Chr08	+	34844973	34848445	762	81771.4	8.11	Mitochondrial	30-113(1.00E-11)		112-573(3.29E-143)				350-469(2.77E-33)		657-758(5.29E-30)			AT1G01900.1	0	850	subtilase family protein
Gorai.008G115500	Gorai.008G115500.1	SBT1	Chr08	+	34839745	34842211	770	82537.8	9.21	Mitochondrial	29-114(1.95E-13)		113-583(1.25E-137)				356-479(5.91E-24)		665-766(1.78E-36)			AT1G01900.1	0	756	subtilase family protein
Gorai.008G115400	Gorai.008G115400.1	SBT1	Chr08	+	34829964	34832858	776	83240.4	8.43	Chloroplast	37-123(2.27E-13)		122-590(1.04E-139)				365-486(6.06E-29)		671-772(1.40E-39)			AT1G01900.1	0	757	subtilase family protein
Gorai.008G024400	Gorai.008G024400.1	SBT1	Chr08	+	2820433	2823229	635	68794.2	4.89	PlasmaMembrane	2-75(5.51E-09)			73-452(2.51E-92)					531-635(3.95E-29)			AT5G67360.1	1.73e-129	400	Subtilase family protein
Gorai.007G221100	Gorai.007G221100.1	SBT1	Chr07	-	25626407	25629758	762	80566.3	6.37	Chloroplast	33-108(1.73E-21)		105-577(1.41E-150)				346-472(1.18E-41)		658-758(3.33E-37)		AprE:[481-638(1.86E-08)]	AT5G67360.1	0	1175	Subtilase family protein
Gorai.007G214100	Gorai.007G214100.1	SBT1	Chr07	-	23458957	23461233	759	82539.8	6.7	PlasmaMembrane	26-112(9.29E-17)		109-568(4.02E-123)				350-462(4.16E-11)		646-750(3.30E-30)			AT5G67090.1	0	688	Subtilisin-like serine endopeptidase family protein
Gorai.007G164000	Gorai.007G164000.1	SBT5	Chr07	-	14396881	14401857	771	82924.6	8.14	PlasmaMembrane	29-114(1.10E-17)		112-594(6.15E-127)				359-489(6.15E-32)		672-767(3.55E-37)			AT2G04160.1	0	1004	Subtilisin-like serine endopeptidase family protein
Gorai.007G094000	Gorai.007G094000.1	SBT4	Chr07	+	6904287	6907752	749	80298.1	9.08	PlasmaMembrane	37-114(2.23E-17)		111-568(7.45E-130)				343-466(1.25E-14)		644-743(4.52E-30)			AT4G00230.1	0	985	xylem serine peptidase 1
Gorai.007G025800	Gorai.007G025800.1	SBT2	Chr07	-	1794524	1795373	96	10820.3	5.79	Mitochondrial		[40-94(1.29E-01)]										AT2G19170.1	4.15e-07	49.7	subtilisin-like serine protease 3
Gorai.007G011200	Gorai.007G011200.1	SBT6	Chr07	-	881712	896183	1311	144780	5.94	Cytoplasmic					39-521(0.00E+00)						Spc7 superfamily:[1069-1212(2.56E-05)];FbpA superfamily:[160-207(2.68E-03)];TPPII :[820-1005(1.55E-81)]	AT4G20850.1	0	2038	tripeptidyl peptidase ii
Gorai.006G156500	Gorai.006G156500.1	SBT4	Chr06	+	41526885	41530120	744	80293.5	8.99	PlasmaMembrane	29-107(4.49E-15)		106-563(2.68E-132)				336-460(5.92E-14)		638-738(4.93E-26)			AT5G03620.1	0	859	Subtilisin-like serine endopeptidase family protein
Gorai.006G111200	Gorai.006G111200.1	SBT5	Chr06	-	35797579	35801131	718	76504.1	6.54	PlasmaMembrane	1-66(7.02E-11)		64-537(1.79E-132)				307-435(9.09E-22)		617-710(1.84E-35)			AT2G04160.1	0	561	Subtilisin-like serine endopeptidase family protein
Gorai.006G096000	Gorai.006G096000.1	SBT6	Chr06	-	33536759	33540031	303	33147.6	5.84	PlasmaMembrane				43-287(0.00E+00)								AT5G19660.1	5.25e-178	521	SITE-1 protease
Gorai.006G065800	Gorai.006G065800.4	SBT1	Chr06	+	24849485	24852700	506	54958.4	6.79	PlasmaMembrane	33-118(1.15E-23)		115-350(9.77E-127)						401-499(1.65E-38)			AT5G51750.1	0	556	subtilase 1.3
	Gorai.006G065800.3	SBT1	Chr06	+	24849485	24852700	599	65096.2	8.65	Mitochondrial	33-118(2.24E-23)		115-412(9.70E-137)						494-592(2.02E-38)		fusolisin superfamily:376-457(7.01E-03)	AT5G51750.1	2.17e-156	469	subtilase 1.3
	Gorai.006G065800.2	SBT1	Chr06	+	24849485	24852700	613	64949.1	9.32	Mitochondrial			1-426(6.29E-122)				191-321(2.31E-37)		508-606(1.67E-37)		fusolisin superfamily:390-471(8.55E-03)	AT5G51750.1	0	962	subtilase 1.3
	Gorai.006G065800.1	SBT1	Chr06	+	24849485	24852700	779	83457.1	8.4	Chloroplast	33-118(1.10E-23)		115-592(5.28E-151)				357-487(6.33E-38)		674-772(1.08E-37)			AT5G51750.1	0	1174	subtilase 1.3
Gorai.005G099900	Gorai.005G099900.1	SBT1	Chr05	+	15761714	15764391	767	81230.5	6.47	PlasmaMembrane	40-115(6.65E-22)		112-584(3.82E-141)				352-479(6.62E-38)		665-762(7.97E-32)		AprE:[490-654(1.07E-11)]	AT5G67360.1	0	969	Subtilase family protein
Gorai.004G284900	Gorai.004G284900.2	SBT1	Chr04	+	61595007	61597445	631	66624.6	8.89	Chloroplast	28-105(2.23E-22)		102-577(1.75E-147)				347-472(1.17E-37)					AT2G05920.1	0	873	Subtilase family protein
	Gorai.004G284900.1	SBT1	Chr04	+	61594955	61597505	763	81709.1	9.43	Chloroplast	28-105(2.73E-22)		102-577(1.35E-148)				347-472(9.22E-38)		658-756(1.32E-32)			AT2G05920.1	0	1106	Subtilase family protein
Gorai.004G280300	Gorai.004G280300.2	SBT6	Chr04	-	61233376	61238749	800	89667.5	6.02	PlasmaMembrane				43-219(1.55E-122)								AT5G19660.2	0	1269	SITE-1 protease
	Gorai.004G280300.1	SBT6	Chr04	-	61233376	61238749	1030	115318	6.17	PlasmaMembrane						193-449(0.00E+00)						AT5G19660.1	0	1603	SITE-1 protease
Gorai.004G206800	Gorai.004G206800.1	SBT4	Chr04	-	53733710	53737004	779	83595.9	5.27	Extracellular	33-110(2.42E-21)		107-563(2.86E-133)				337-459(2.86E-21)		636-736(1.51E-34)			AT5G59190.1	0	648	subtilase family protein
Gorai.004G205700	Gorai.004G205700.1	SBT1	Chr04	+	53580903	53582506	532	55883.9	6.43	Cytoplasmic			18-468(7.58E-117)				245-372(3.70E-36)					AT1G04110.1	6.57e-159	473	Subtilase family protein
Gorai.004G205600	Gorai.004G205600.1	SBT1	Chr04	+	53577659	53579869	737	77594	5.4	Extracellular	31-109(1.83E-14)		106-556(2.04E-135)				330-455(5.87E-39)		636-733(3.84E-38)			AT1G04110.1	0	597	Subtilase family protein
Gorai.004G155800	Gorai.004G155800.1	SBT4	Chr04	+	44247110	44250191	751	80812.8	9.32	Mitochondrial	39-116(6.07E-20)		114-570(1.17E-132)				344-466(1.34E-16)		646-745(3.71E-28)			AT4G00230.1	0	989	xylem serine peptidase 1
Gorai.004G118400	Gorai.004G118400.2	SBT6	Chr04	+	28819205	28825190	366	40982.3	5.39	Nuclear											TPPII superfamily:[3-49(5.41E-08)];BDP1 superfamily:[42-222(1.14E-03)]	AT4G20850.1	4.04e-152	465	tripeptidyl peptidase ii
	Gorai.004G118400.1	SBT6	Chr04	+	28819205	28825190	367	41081.4	5.39	Nuclear											TPPII superfamily:[3-49(5.43E-08)];BDP1 superfamily:[42-223(4.73E-05)]	AT4G20850.1	2.91e-150	460	tripeptidyl peptidase ii
Gorai.004G118300	Gorai.004G118300.1	SBT6	Chr04	+	28793858	28807840	1033	113554	7.79	Cytoplasmic					108-590(0.00E+00)						DUF3020 superfamily:[224-237(3.416E-03)];TPPII :[889-1027(1.06E-66)]	AT4G20850.1	0	1613	tripeptidyl peptidase ii
Gorai.004G034100	Gorai.004G034100.1	SBT5	Chr04	+	2793926	2796867	773	83026.2	8.73	Chloroplast	29-114(1.38E-18)		112-593(4.45E-126)				358-489(2.58E-34)		672-769(1.86E-43)			AT5G59810.1	0	913	Subtilase family protein
Gorai.004G025300	Gorai.004G025300.4	SBT2	Chr04	+	1990134	1996886	596	63386.2	6.53	Chloroplast	65-128(3.60E-16)		131-366(2.16E-103)	542-583(2.07E-01)			379-515(2.16E-15)					AT2G19170.1	0	1015	subtilisin-like serine protease 3
	Gorai.004G025300.3	SBT2	Chr04	+	1990134	1996886	612	65792.9	6.91	Mitochondrial	65-128(4.04E-16)			131-427(1.18E-87)					513-606(1.38E-22)		fusolisin superfamily:[391-471(9.76E-04)]	AT2G19170.1	0	595	subtilisin-like serine protease 3
	Gorai.004G025300.2	SBT2	Chr04	+	1990134	1996886	698	74153.7	6.88	Chloroplast	65-128(2.77E-16)		131-634(1.21E-121)				379-515(1.44E-15)				T7SS_mycosin superfamily:[523-675(3.41E-10)]	AT2G19170.1	0	1184	subtilisin-like serine protease 3
	Gorai.004G025300.1	SBT2	Chr04	+	1990057	1996888	819	87283.6	8.22	PlasmaMembrane	65-128(4.78E-16)		131-634(1.22E-120)				379-515(2.14E-15)		720-813(6.53E-22)		T7SS_mycosin superfamily:[523-675(3.02E-10)]	AT2G19170.1	0	1390	subtilisin-like serine protease 3
Gorai.004G002600	Gorai.004G002600.1	SBT4	Chr04	-	178933	180497	192	19543.8	5.58	Chloroplast				36-179(4.90E-58)								AT5G58840.2	1.45e-56	187	Subtilase family protein
Gorai.004G002500	Gorai.004G002500.3	SBT4	Chr04	-	171225	177316	1204	128936	8.52	PlasmaMembrane	568-645(5.61E-18)		24-470(6.38E-126)				247-367(1.97E-14)		1095-1193(1.07E-27)			AT5G59090.1	0	657	subtilase 4.12
	Gorai.004G002500.2	SBT4	Chr04	-	171225	177316	1268	135375	7.71	PlasmaMembrane	568-645(6.46E-18)		642-1085(7.26E-127)	863-982(1.66E-21)				1159-1257(9.77E-28)				AT5G59100.1	0	788	Subtilisin-like serine endopeptidase family protein
	Gorai.004G002500.1	SBT4	Chr04	-	168260	186478	1351	144328	6.99	PlasmaMembrane	33-110(4.97E-19)		725-1168(1.46E-126)	946-1065(1.39E-21)				598-664(2.55E-14)				AT5G59100.1	0	702	Subtilisin-like serine endopeptidase family protein
Gorai.004G001900	Gorai.004G001900.2	SBT4	Chr04	+	128683	129751	216	23300.7	9.52	Chloroplast				1-33(3.85E-17)					107-205(2.62E-32)			AT5G59100.1	1.51e-79	254	Subtilisin-like serine endopeptidase family protein
	Gorai.004G001900.1	SBT4	Chr04	+	126748	132877	1171	126913	8.88	PlasmaMembrane	33-110(2.25E-18)		107-552(2.51E-131)	707-1051(1.40E-65)			330-449(4.08E-22)	892-944(1.71E-03)	603-650(1.95E-12)		denti_PrtP superfamily:[983-1147(3.64E-07)]	AT5G59100.1	0	731	Subtilisin-like serine endopeptidase family protein
Gorai.003G178600	Gorai.003G178600.1	SBT2	Chr03	-	45005045	45008321	803	85941.3	8.33	PlasmaMembrane	52-115(8.73E-07)		115-620(6.92E-104)	504-601(3.79E-12)			361-496(5.94E-09)		702-794(5.88E-20)		fusolisin superfamily:[584-665(6.95E-04)]	AT2G19170.1	0	626	subtilisin-like serine protease 3
Gorai.003G154100	Gorai.003G154100.2	SBT3	Chr03	+	42293198	42300592	754	81585.2	7.23	PlasmaMembrane	9-88(1.18E-16)		85-562(2.34E-133)				338-457(1.56E-12)		646-743(1.14E-31)			AT4G26330.2	0	917	Subtilisin-like serine endopeptidase family protein
	Gorai.003G154100.1	SBT3	Chr03	+	42296236	42300592	774	83976	7.27	PlasmaMembrane	29-108(1.36E-16)		105-582(2.10E-133)				358-477(1.28E-12)		666-763(1.53E-31)			AT4G26330.2	0	916	Subtilisin-like serine endopeptidase family protein
Gorai.003G074100	Gorai.003G074100.1	SBT3	Chr03	-	17720620	17724002	766	82324.2	9.06	PlasmaMembrane	30-109(1.18E-20)		106-584(3.13E-142)				359-486(1.19E-26)		669-759(5.68E-31)		AprE:[497-650(2.61E-09)]	AT1G32940.1	0	753	Subtilase family protein
Gorai.001G224300	Gorai.001G224300.2	SBT5	Chr01	+	45735246	45741161	770	82629.3	9.26	Extracellular	29-114(3.06E-18)		112-593(7.29E-136)				357-488(4.01E-38)		671-766(2.31E-26)			AT2G04160.1	0	1040	Subtilisin-like serine endopeptidase family protein
	Gorai.001G224300.1	SBT5	Chr01	+	45735138	45741161	772	82899.6	9.29	Extracellular	29-114(3.01E-18)		112-595(1.09E-135)				357-490(1.96E-36)		673-768(2.34E-26)			AT2G04160.1	0	1035	Subtilisin-like serine endopeptidase family protein
Gorai.001G182200	Gorai.001G182200.1	SBT1	Chr01	-	27866544	27873965	1258	139356	8.72	PlasmaMembrane	538-619(4.00E-21)		616-1071(1.92E-126)	840-966(4.56E-36)				1152-1254(1.73E-35)			Exostosin:119-400(3.02E-66);DUF507 superfamily:397-464(6.068E-03)	AT1G04110.1	0	1077	Subtilase family protein
Gorai.001G173100	Gorai.001G173100.2(Query frame = +2)	SBT3	Chr01	-	25139711	25146934	343	49036.3	9.88	PlasmaMembrane				372-424(5.12652e-13)								AT4G10550.4	5e-16	81.6	Subtilase family protein
Gorai.001G060600	Gorai.001G060600.1	SBT1	Chr01	+	5993369	5995627	753	80991.9	6.05	Extracellular	32-108(2.24E-17)		107-571(9.83E-123)				341-458(5.51E-11)		649-749(1.15E-29)		fusolisin superfamily:[535-617(6.19E-03)]	AT3G14240.1	0	550	Subtilase family protein

## Sheet: G.barbadense
gene ID	class	subgenome	chr	strand	start position	end position	Amino acid length	Molecular Weight	Theoretical pI	location	Inhibitor_I9	Inhibitor_I9 superfamily	Peptidases_S8_3	Peptidases_S8_S53 superfamily	Peptidases_S8_Tripeptidyl_Aminopeptidase_II	Peptidases_S8_SKI-1_like	PA_subtilisin_like	PA superfamily	fn3_6	fn3_6 superfamily	other domain	arabidopsis thaliana ID	E-Value	bit score	annotation
GB_D12G2713	SBT3	D	D12	+	57731418	57734517	776	82597	7.92	PlasmaMembrane	34-113(5.82E-22)		110-587(9.71E-143)				366-490(3.80E-29)		669-764(6.42E-35)			AT4G10540.1	0	687	Subtilase family protein
GB_D10G0531	SBT1	D	D10	+	4689416	4691734	772	81429.5	8.47	Extracellular	25-103(1.98E-15)		102-580(2.79E-143)				342-475(1.80E-37)		662-766(6.32E-31)			AT3G14240.1	0	594	Subtilase family protein
GB_A13G0015	SBT5	A	A13	-	119535	125951	741	80330.5	8.52	PlasmaMembrane	61-137(1.64E-15)		134-560(3.16E-138)					383-437(1.27E-02)	641-738(4.42E-25)			AT1G20160.1	0	573	Subtilisin-like serine endopeptidase family protein
GB_D10G2824	SBT4	D	scaffold10949_obj_D10	-	25	2236	216	23866.6	9.37	Extracellular				59-127(6.43E-20)							PKc_like superfamily:[164-216(4.74E-10)]	AT5G59190.1	1.98e-22	96.7	subtilase family protein
GB_D08G0224	SBT2	D	D08	+	1947385	1952680	818	87294.6	8.39	PlasmaMembrane	65-128(4.77E-16)		131-634(1.85E-120)				379-515(2.18E-15)		720-813(5.92E-22)		T7SS_mycosin superfamily:[523-675(2.94E-10)]	AT2G19170.1	0	640	subtilisin-like serine protease 3
GB_D08G1630	SBT4	D	D08	+	49476792	49479726	750	80622.5	9.36	Mitochondrial	39-116(5.04E-20)		114-570(2.60E-133)				344-466(7.56E-17)		646-745(2.82E-29)			AT4G00230.1	0	595	xylem serine peptidase 1
GB_A05G1867	SBT5	A	A05	+	17762567	17764549	474	49969.4	5.17	Extracellular			14-453(4.75E-99)				220-351(9.16E-26)					AT1G20160.2	0	528	Subtilisin-like serine endopeptidase family protein
GB_D05G1893	SBT5	D	D05	+	16237826	16240915	776	82767.5	6.45	Extracellular	34-109(1.21E-20)		106-577(9.21E-113)				343-474(8.19E-26)		662-763(5.09E-30)		AprE:[485-638(6.25E-10)]	AT1G20160.1	0	837	Subtilisin-like serine endopeptidase family protein
GB_A12G1252	SBT1	A	A12	+	72483339	72485818	776	83252.4	8.13	Chloroplast	38-124(1.08E-12)		123-591(1.14E-136)				366-487(3.51E-28)		672-773(9.55E-40)			AT1G01900.1	0	756	subtilase family protein
GB_D05G0246	SBT6	D	D05	-	2321235	2326070	1036	116300	6.49	PlasmaMembrane						195-451(0.00E+00)					YlqF_related_GTPase superfamily:[677-709(9.94E-02)];	AT5G19660.1	0	1593	SITE-1 protease
GB_A13G1546	SBT3	A	A13	+	88650722	88652717	129	13629.5	6.04	Extracellular	46-122(5.67E-18)											AT1G71950.1	1.31e-14	72	Proteinase inhibitor%2C propeptide
GB_A05G1438	SBT1	A	A05	-	13431722	13434040	772	81559.6	8.74	Extracellular	25-103(4.88E-13)		101-580(6.06E-143)				342-461(1.86E-34)		662-766(5.89E-35)			AT2G33585.1	0	591	subtilisin-like protease
GB_A12G1254	SBT1	A	A12	+	72500522	72501505	327	34666.7	8.83	Mitochondrial				169-243(1.61E-37)			16-139(5.05E-35)					AT3G14240.1	2.81e-119	363	Subtilase family protein
GB_D08G2128	SBT4	D	D08	-	58821425	58825198	785	84438.9	5.33	Extracellular	29-106(4.59E-21)		103-559(2.90E-133)				333-455(2.14E-21)		632-743(3.81E-31)			AT1G01900.1	0	550	subtilase family protein
GB_D08G1208	SBT6	D	D08	+	33254076	33285141	1393	154127	6.67	Cytoplasmic					108-590(0.00E+00)						BDP1 superfamily:[1070-1250(1.70E-02)];TPPII :[889-1077(1.36E-81)];DUF922 superfamily:[178-273(3.99E-03)]	AT5G59090.1	0	2071	subtilase 4.12
GB_A09G1241	SBT5	A	A09	-	60385566	60389299	753	80732.6	8.28	PlasmaMembrane	28-102(8.31E-10)		100-573(1.27E-134)				343-471(4.92E-23)		653-746(9.25E-36)			AT4G20850.1	0	550	tripeptidyl peptidase ii
GB_A11G0103	SBT6	A	A11	-	1095806	1109522	1310	144734	5.91	Cytoplasmic					39-521(00.00E+00)						TPPII :[820-1005(1.28E-81)];Spc7 superfamily:[1069-1212(8.35E-05)];FbpA superfamily:[160-207(2.57E-03)]	AT2G04160.1	0	2023	Subtilisin-like serine endopeptidase family protein
GB_D04G0002	SBT3	D	D04	+	3963	10095	805	87022.9	6.7	PlasmaMembrane	42-121(3.84E-21)		118-618(3.32E-128)	409-618(8.18E-21)					701-796(7.83E-35)			AT4G20850.1	0	624	tripeptidyl peptidase ii
GB_A01G1899	SBT1	A	A01	+	102656106	102657212	316	34075.5	6.66	Extracellular	41-104(5.23E-12)			121-292(1.16E-66)								AT1G32960.1	9.72e-132	394	Subtilase family protein
GB_A06G0202	SBT1	A	A06	+	1985166	1987460	764	82470.6	5.9	PlasmaMembrane	32-117(1.01E-16)		114-573(1.84E-134)				352-468(1.25E-11)		652-757(3.81E-34)		AprE:[479-629(2.46E-07)]	AT4G34980.1	0	548	subtilisin-like serine protease 2
GB_A11G1543	SBT5	A	A11	-	17212756	17217281	770	82840.6	8.79	PlasmaMembrane	29-114(3.81E-17)		112-594(1.31E-138)				359-489(1.70E-32)		672-767(8.96E-39)			AT5G67090.1	0	564	Subtilisin-like serine endopeptidase family protein
GB_A03G0306	SBT3	A	A03	-	3689481	3693558	773	83795.7	6.83	PlasmaMembrane	29-108(3.00E-17)		105-582(1.85E-133)				358-477(1.56E-13)		666-763(1.11E-30)			AT2G04160.1	0	558	Subtilisin-like serine endopeptidase family protein
GB_A12G2644	SBT2	A	A12	-	98048199	98048730	95	10809.2	6.83	Mitochondrial		[66-94(4.36E-01)]										AT4G26330.1	1.73e-06	47.8	Subtilisin-like serine endopeptidase family protein
GB_D08G1426	SBT6	D	D08	+	43588897	43591205	329	36585.6	6.3	PlasmaMembrane				63-297(2.72E-179)								AT2G19170.1	4.6e-171	504	subtilisin-like serine protease 3
GB_D12G0234	SBT1	D	D12	+	2800629	2802362	577	62251	4.88	Extracellular				11-388(1.61E-77)			160-283(8.57E-15)		467-572(5.80E-26)			AT5G19660.1	2.13e-127	392	SITE-1 protease
GB_D08G0014	SBT4	D	D08	+	73987	85428	1216	131066	9.15	PlasmaMembrane	748-825(1.50E-17)			184-566(2.25E-87)			337-456(1.09E-21)	993-1057(4.53E-04)	640-738(3.84E-31)			AT5G67360.1	0	635	Subtilase family protein
GB_A06G0196	SBT1	A	A06	-	1916994	1919186	730	79224.4	5.57	PlasmaMembrane	4-82(1.08E-12)		79-539(2.54E-131)	370-539(2.59E-07)					618-723(2.73E-36)			AT5G59100.1	0	542	Subtilisin-like serine endopeptidase family protein
GB_D06G2012	SBT4	D	D06	-	56752939	56753403	154	16633.7	9.55	Extracellular				1-34(6.87E-15)					107-148(1.56E-12)		denti_PrtP superfamily:[1-70(5.474E-03)]	AT5G67090.1	1.05e-45	160	Subtilisin-like serine endopeptidase family protein
GB_D09G0559	SBT1	D	D09	-	23086077	23088413	778	83484.1	8.51	Chloroplast	33-118(1.11E-23)		115-592(7.83E-150)				357-487(6.83E-38)		674-772(4.31E-38)			AT5G59190.1	0	648	subtilase family protein
GB_D05G1433	SBT1	D	D05	+	12126390	12127604	404	43068.7	6.66	Extracellular	27-104(7.24E-21)		102-337(8.17E-112)				344-400(2.37E-08)					AT5G51750.1	0	527	subtilase 1.3
GB_A05G2077	SBT1	A	A05	+	20119524	20121776	750	80930.8	5.57	Extracellular	33-98(5.17E-17)		110-571(1.03E-132)				344-454(1.73E-11)		649-747(9.84E-24)		AprE:[469-632(1.20E-09)]	AT3G14067.1	0	546	Subtilase family protein
GB_A08G1207	SBT6	A	A08	-	71559661	71589020	1348	148932	6.33	Cytoplasmic					108-590(0.00E+00)						TPPII :[844-1032(1.69E-82)];BDP1 superfamily:[1025-1203(5.40E-05)];PRK03918 superfamily:[1121-1317(3.18E-03)];Topoisomer_IB_N superfamily:[221-277(3.63E-02)]	AT5G67360.1	0	1957	Subtilase family protein
GB_A08G1631	SBT4	A	A08	+	97187154	97190071	744	79975.8	9.31	Mitochondrial	33-110(3.77E-20)		108-564(3.26E-132)				338-460(1.89E-17)		640-739(4.72E-29)			AT4G20850.1	0	593	tripeptidyl peptidase ii
GB_D03G1016	SBT3	D	D03	+	35471871	35474951	765	82278.1	8.96	PlasmaMembrane	30-109(2.01E-21)		106-584(7.07E-142)				359-486(4.90E-28)		669-759(9.40E-31)		AprE:[497-650(2.94E-09)]	AT4G00230.1	0	602	xylem serine peptidase 1
GB_A11G2360	SBT1	A	A11	+	60073485	60075770	761	80545.1	6.14	Chloroplast	33-108(5.93E-22)		105-577(3.08E-151)				346-472(2.06E-41)		658-758(1.39E-37)		AprE:[481-638(1.93E-08)]	AT4G10540.1	0	652	Subtilase family protein
GB_A10G0055	SBT2	A	A10	-	534977	538484	841	90661.9	6.25	PlasmaMembrane	76-149(5.65E-13)		149-656(1.07E-121)				395-530(2.63E-13)		743-836(5.27E-15)		AprE:[545-743(3.33E-07)]	AT5G67360.1	0	1094	Subtilase family protein
GB_A12G1253	SBT1	A	A12	+	72493330	72495636	768	82601.9	9.2	Chloroplast	28-114(2.96E-14)		113-583(9.16E-139)				356-479(1.89E-23)		664-765(8.91E-37)			AT4G20430.1	0	759	Subtilase family protein
GB_D07G0592	SBT1	D	D07	+	6256802	6258991	729	78594	6.16	Cytoplasmic	9-85(2.66E-17)		84-548(7.97E-122)				318-435(2.08E-10)		626-726(2.01E-29)		AprE:[446-609(1.02E-08)]	AT1G01900.1	0	549	subtilase family protein
GB_D06G2013	SBT4	D	D06	-	56766549	56790960	2131	228131	6.03	Extracellular	1429-1504(1.10E-18)		1502-1959(5.19E-132)				338-461(1.35E-21)		2032-2129(2.62E-34)			AT3G14240.1	0	659	Subtilase family protein
GB_D06G0196	SBT1	D	D06	-	1855582	1857609	675	73212.5	5.11	PlasmaMembrane	4-82(2.65E-12)		79-539(2.45E-130)	370-539(3.66E-08)					618-675(7.16E-16)			AT5G59100.1	0	587	Subtilisin-like serine endopeptidase family protein
GB_A05G2122	SBT1	A	A05	-	20534741	20537047	768	80836.5	6.33	PlasmaMembrane	34-109(4.23E-19)		106-578(7.38E-139)				346-473(5.20E-40)		659-764(2.54E-31)		AprE:[484-680(4.02E-10)]	AT5G67090.1	0	613	Subtilisin-like serine endopeptidase family protein
GB_A12G2710	SBT3	A	A12	+	98534620	98538062	746	79135.2	8.55	PlasmaMembrane	34-113(4.84E-21)		110-587(8.42E-142)				364-490(7.52E-29)		669-742(3.74E-24)			AT5G67360.1	0	652	Subtilase family protein
GB_A02G1070	SBT3	A	A02	-	41591709	41594793	765	82199.1	9.05	PlasmaMembrane	30-109(6.83E-22)		106-584(1.91E-141)				359-486(2.91E-26)		669-760(8.22E-33)		AprE:[497-650(4.30E-08)]	AT4G10540.1	0	594	Subtilase family protein
GB_A05G1866	SBT5	A	A05	+	17762096	17762494	98	10600.2	6.39	Chloroplast	34-98(4.38E-16)											AT4G10550.1	5.63e-20	85.9	Subtilase family protein
GB_A04G1174	SBT6	A	A04	-	71824946	71827253	329	36670.7	6.45	PlasmaMembrane				63-297(5.08E-180)								AT1G20160.1	1.04e-169	501	Subtilisin-like serine endopeptidase family protein
GB_D12G0235	SBT1	D	D12	+	2815913	2816581	222	23980.2	5.91	PlasmaMembrane				1-33(2.72E-14)					112-217(2.41E-29)			AT5G19660.1	4.25e-47	167	SITE-1 protease
GB_D05G1447	SBT1	D	D05	-	12223361	12225679	772	81594.6	8.81	Extracellular	25-103(8.59E-12)		101-580(4.79E-140)				342-461(9.90E-35)		662-766(4.23E-35)			AT3G14240.1	0	590	Subtilase family protein
GB_A05G4461	SBT3	A	A05	-	107540052	107546189	805	87022.9	6.7	PlasmaMembrane	42-121(3.84E-21)		118-618(3.32E-128)	409-618(8.18E-21)					701-796(7.83E-35)			AT3G14240.1	0	624	Subtilase family protein
GB_A11G0241	SBT2	A	A11	-	2100911	2101401	95	10829.3	6.08	Mitochondrial		[40-94(2.10E-01)]										AT1G32960.1	5.48e-07	49.3	Subtilase family protein
GB_D10G0588	SBT1	D	D10	-	5288829	5291144	771	81805.3	5.85	PlasmaMembrane	30-107(7.01E-20)		105-576(3.06E-145)				347-470(2.28E-37)		659-760(4.53E-41)			AT2G19170.1	0	642	subtilisin-like serine protease 3
GB_D10G0055	SBT2	D	D10	-	490302	493806	829	89026.8	6.31	PlasmaMembrane	55-137(1.43E-12)		137-644(2.72E-118)				383-518(1.16E-13)		731-824(2.25E-17)		AprE:[533-731(2.97E-07)]	AT3G14067.1	0	1095	Subtilase family protein
GB_D12G2649	SBT2	D	D12	-	57227025	57227552	95	10766.2	6.27	Nuclear		[66-94(3.40E-01)]									SH2 superfamily:[9-32(4.082E-03)];	AT4G20430.1	1.51e-06	48.1	Subtilase family protein
GB_A03G0086	SBT2	A	A03	+	919818	923060	812	87271.9	8.43	PlasmaMembrane	51-114(8.66E-07)		114-630(3.16E-106)	529-665(6.23E-09)			371-506(5.05E-09)		712-804(1.10E-19)			AT2G19170.1	0	556	subtilisin-like serine protease 3
GB_D06G0199	SBT1	D	D06	+	1914836	1917130	764	82604.7	5.77	PlasmaMembrane	32-117(1.28E-16)		114-573(2.01E-134)				352-468(7.06E-11)		652-757(7.68E-35)		fusolisin superfamily:[537-619(1.15E-03)]	AT5G67090.1	0	540	Subtilisin-like serine endopeptidase family protein
GB_D06G2011	SBT4	D	D06	-	56732570	56737978	739	79413.6	5.69	PlasmaMembrane	35-110(3.72E-19)		108-566(3.24E-137)				339-463(2.64E-20)		639-737(4.95E-36)			AT4G00230.1	0	550	xylem serine peptidase 1
GB_A12G0218	SBT1	A	A12	+	3080948	3083251	767	83184.8	5.38	PlasmaMembrane	31-110(1.01E-12)		108-578(1.28E-129)				351-473(9.56E-14)		657-762(3.39E-27)			AT4G34980.1	0	564	subtilisin-like serine protease 2
GB_D06G1858	SBT2	D	D06	-	54056200	54059349	824	87883.1	5.95	PlasmaMembrane	59-133(9.65E-12)		131-641(9.86E-105)				378-513(1.49E-09)		724-818(1.12E-15)			AT1G62340.1	0	542	PA-domain containing subtilase family protein
GB_A10G0518	SBT1	A	A10	+	5057763	5060081	772	81470.8	8.9	Extracellular	25-103(4.19E-15)		102-580(1.33E-142)				342-475(2.55E-36)		662-766(5.00E-31)			AT3G14240.1	0	594	Subtilase family protein
GB_A05G2668	SBT1	A	A05	-	28335384	28337672	762	82467.4	5.63	PlasmaMembrane	30-115(3.24E-15)		112-571(1.60E-137)				350-466(5.60E-09)		650-755(2.60E-36)		AprE:[477-630(2.12E-08)]	AT5G67090.1	0	545	Subtilisin-like serine endopeptidase family protein
GB_A05G0240	SBT6	A	A05	-	2349699	2354552	1038	116449	6.47	PlasmaMembrane						197-453(0.00E+00)					DUF4381 superfamily:[1000-1038(1.89E-03)];YlqF_related_GTPase superfamily:[679-711(3.35E-03)]	AT5G19660.1	0	1614	SITE-1 protease
GB_D08G0307	SBT5	D	D08	+	2771145	2774093	786	84825.4	8.88	PlasmaMembrane	29-114(2.84E-18)		112-607(2.58E-120)				372-503(7.71E-34)		686-783(1.68E-43)			AT5G59810.1	0	555	Subtilase family protein
GB_A08G2143	SBT4	A	A08	-	111001699	111005010	778	83688.1	5.49	Extracellular	33-110(8.47E-21)		107-563(4.67E-133)				337-459(1.81E-21)		636-736(1.35E-34)			AT5G59190.1	0	543	subtilase family protein
GB_A06G1946	SBT4	A	A06	-	111826707	111830923	566	60524.7	5.95	PlasmaMembrane	34-111(3.54E-16)		110-330(3.17E-108)	475-536(7.08E-04)			338-461(3.89E-23)					AT5G59190.1	6.54e-162	478	subtilase family protein
GB_A05G2075	SBT1	A	A05	+	20101008	20102621	454	49093.7	9	Extracellular				4-327(1.05E-36)						406-429(1.55E-01)	PI-PLCc_GDPD_SF superfamily:[324-404(1.158E-03)]	AT2G05920.1	1.52e-84	276	Subtilase family protein
GB_A05G1868	SBT5	A	A05	+	17764561	17765187	208	22700.7	6.73	Extracellular									94-191(3.18E-32)			AT1G20160.2	2.13e-71	232	Subtilisin-like serine endopeptidase family protein
GB_D05G4059	SBT5	D	D05	+	66228809	66242159	1174	129349	8.29	Cytoplasmic	429-514(1.52E-19)		512-993(4.88E-143)				758-889(3.13E-40)		1072-1171(3.68E-35)		BTB:[150-258(7.94E-27)];RNase_H_like:[295-395(6.79E-14)];MATH:[17-116(1.29E-02)];BACK superfamily:[259-288(2.76E-02)];M35_like superfamily:[1005-1050(1.53E-03)]	AT5G59810.1	0	558	Subtilase family protein
GB_A10G2664	SBT4	A	A10	+	108885521	108987367	2717	292955	6.22	PlasmaMembrane	34-112(1.08E-22)		2229-2685(1.21E-122)				1743-1866(3.19E-20)	2042-2138(1.24E-36)	2042-2138(1.24E-36)			AT3G46850.1	0	588	Subtilase family protein
GB_A09G1672	SBT4	A	A09	-	67930291	67933458	743	80519.8	9.11	PlasmaMembrane	29-107(6.68E-15)		106-563(5.52E-136)				336-460(4.39E-15)		638-738(6.34E-26)			AT5G03620.1	0	561	Subtilisin-like serine endopeptidase family protein
GB_A01G2355	SBT4	A	A01	+	112957479	112958018	179	19809.6	8.68	Cytoplasmic									74-175(5.16E-26)			AT5G03620.1	2.96e-48	169	Subtilisin-like serine endopeptidase family protein
GB_A10G0567	SBT1	A	A10	-	5800449	5802764	771	81645.1	5.75	Extracellular	30-107(6.24E-20)		105-576(6.95E-145)				347-470(1.72E-34)		659-760(7.87E-41)			AT3G14067.1	0	627	Subtilase family protein
GB_D13G0051	SBT5	D	D13	+	405911	412078	798	86187.4	8.57	PlasmaMembrane	62-137(2.57E-16)		134-617(1.53E-130)				382-512(3.06E-27)		698-795(5.63E-27)		AprE:[523-677(1.06E-07)]	AT1G20160.1	0	586	Subtilisin-like serine endopeptidase family protein
GB_D02G0954	SBT1	D	D02	+	16200820	16203120	766	81311.6	6.76	PlasmaMembrane	40-115(6.64E-22)		112-584(3.26E-141)				352-479(4.20E-37)		665-762(7.96E-32)		AprE:[494-642(2.20E-11)]	AT5G67360.1	0	627	Subtilase family protein
GB_D03G1690	SBT3	D	D03	+	50056132	50060182	773	83980	7.26	PlasmaMembrane	29-108(3.13E-15)		105-582(5.72E-134)				358-477(1.03E-12)		666-763(1.27E-31)			AT4G26330.1	0	553	Subtilisin-like serine endopeptidase family protein
GB_D08G2115	SBT1	D	D08	+	58673962	58676225	720	77732.8	6.49	Cytoplasmic	58-119(1.05E-11)		118-556(3.88E-128)				347-451(2.17E-29)		621-717(6.08E-39)			AT1G04110.1	5.35e-172	513	Subtilase family protein
GB_A13G0305	SBT3	A	A13	-	3286476	3290842	765	82257.1	8.23	PlasmaMembrane	30-109(3.83E-23)		106-590(1.20E-135)				353-481(9.60E-26)		671-733(1.29E-20)			AT4G10550.1	0	565	Subtilase family protein
GB_D12G1237	SBT1	D	D12	+	37440353	37441746	447	47327.9	8.29	Chloroplast			15-250(6.98E-110)	349-438(2.07E-07)			258-381(3.86E-24)					AT1G01900.1	2.28e-157	465	subtilase family protein
GB_D08G2982	SBT4	D	scaffold22430_obj_D08	+	4016	4799	190	20878.9	10.06	Mitochondrial				83-154(4.31E-32)								AT5G59190.1	2.69e-24	101	subtilase family protein
GB_A06G1798	SBT2	A	A06	-	108172654	108175809	826	88088.4	6.33	PlasmaMembrane	60-129(3.35E-10)		134-642(3.47E-103)				379-514(3.33E-09)		725-819(9.69E-16)			AT1G62340.1	0	546	PA-domain containing subtilase family protein
GB_D03G1906	SBT2	D	D03	-	52939479	52940129	216	23444.5	10.11	Mitochondrial				1-34(5.00E-17)					116-208(9.90E-22)		fusolisin superfamily:[2-79(1.336E-05)]	AT4G30020.1	4.65e-45	162	PA-domain containing subtilase family protein
GB_A06G1945	SBT4	A	A06	-	111809345	111817586	756	81544.3	6.86	PlasmaMembrane	35-110(1.63E-17)		108-584(8.77E-129)				358-481(4.29E-21)		657-754(5.07E-34)			AT5G59100.1	0	625	Subtilisin-like serine endopeptidase family protein
GB_D11G0236	SBT2	D	D11	-	1930923	1931411	95	10820.3	5.79	Mitochondrial		[40-94(1.26E-01)]										AT2G19170.1	3.6e-07	49.7	subtilisin-like serine protease 3
GB_A06G0018	SBT5	A	A06	+	131663	134780	768	81878.2	6.3	Extracellular	31-106(8.78E-21)		103-581(9.63E-136)				347-477(1.46E-27)		665-762(1.21E-33)		AprE:[486-641(1.68E-09)]	AT1G20160.1	0	539	Subtilisin-like serine endopeptidase family protein
GB_D09G1535	SBT4	D	D09	+	43646863	43650033	743	80231.4	8.94	PlasmaMembrane	29-107(4.48E-15)		106-563(1.83E-132)				336-460(6.35E-15)		638-738(4.01E-26)			AT5G03620.1	0	561	Subtilisin-like serine endopeptidase family protein
GB_A04G0033	SBT5	A	A04	-	422831	436044	1158	127940	8.87	PlasmaMembrane	413-498(6.78E-19)		496-977(1.38E-142)				742-873(3.55E-39)		1056-1155(4.49E-35)		BTB:[163-271(2.05E-27)];BACK superfamily:[272-301(6.33E-05)];MATH:[30-129(2.06E-02)];M35_like superfamily:[989-1034(1.62E-03)]	AT5G59810.1	0	562	Subtilase family protein
GB_D05G1121	SBT2	D	D05	-	9440908	9447191	846	90849.8	6.7	PlasmaMembrane	98-154(5.31E-12)		154-661(7.72E-123)				400-535(2.33E-13)		748-841(1.08E-18)		AprE:[550-715(1.07E-06)]	AT4G20430.1	0	1149	Subtilase family protein
GB_A07G1683	SBT1	A	A07	-	39580531	39582828	765	82860.1	9.19	PlasmaMembrane	26-107(8.57E-21)		104-579(1.03E-144)				348-474(3.97E-35)		660-762(6.27E-35)			AT1G04110.1	0	616	Subtilase family protein
GB_D07G1692	SBT1	D	D07	-	28089891	28092188	765	82494.5	9.05	PlasmaMembrane	26-107(4.05E-21)		104-579(9.08E-143)				348-474(3.40E-34)		660-762(7.48E-35)			AT1G04110.1	0	619	Subtilase family protein
GB_D08G2849	SBT6	D	D08	-	66710924	66715603	1029	115275	6.2	PlasmaMembrane						193-449(0.00E+00)						AT5G19660.1	0	1605	SITE-1 protease
GB_A01G1901	SBT1	A	A01	+	102659203	102659652	149	16469.6	10.11	Chloroplast									37-143(8.22E-25)			AT4G34980.1	2.45e-40	145	subtilisin-like serine protease 2
GB_A11G0882	SBT4	A	A11	+	7921060	7924519	748	80276.9	8.8	PlasmaMembrane	37-114(1.33E-17)		111-568(1.01E-129)				343-466(1.00E-13)		644-743(6.76E-27)			AT4G00230.1	0	585	xylem serine peptidase 1
GB_A05G1795	SBT5	A	A05	+	17076915	17077658	214	23579.7	9.4	PlasmaMembrane				88-136(2.45E-10)								AT5G59810.1	2.49e-38	142	Subtilase family protein
GB_D09G1085	SBT5	D	D09	-	37726083	37729818	760	81452	7.23	PlasmaMembrane	28-109(8.83E-16)		107-580(9.38E-133)				350-478(2.74E-22)		660-753(2.53E-35)			AT2G04160.1	0	556	Subtilisin-like serine endopeptidase family protein
GB_A02G0887	SBT1	A	A02	+	20392117	20398920	767	81305.3	6.61	PlasmaMembrane	40-115(1.88E-21)		112-585(4.97E-139)				352-480(3.67E-37)		666-763(1.37E-32)		AprE:[491-642(2.84E-11)]	AT5G67360.1	0	625	Subtilase family protein
GB_A05G0937	SBT4	A	A05	-	8654889	8657500	586	62471.6	5.99	Chloroplast	37-111(2.09E-19)		110-548(3.31E-109)				326-444(2.48E-20)					AT5G59190.1	0	588	subtilase family protein
GB_D11G1580	SBT5	D	D11	-	14873997	14891422	770	82904.6	8.15	PlasmaMembrane	29-114(1.10E-17)		112-594(7.41E-137)				359-489(2.96E-32)		672-767(3.71E-37)			AT2G04160.1	0	561	Subtilisin-like serine endopeptidase family protein
GB_A08G2910	SBT1	A	A08	+	120123132	120125365	720	77041.6	9.42	Chloroplast	2-73(1.13E-17)		70-545(4.26E-147)				315-440(5.92E-37)		626-714(1.74E-24)			AT2G05920.1	0	594	Subtilase family protein
GB_A01G1900	SBT1	A	A01	+	102658629	102659105	158	16510.6	5.24	Extracellular				78-152(1.44E-26)			1-47(5.82E-09)					AT4G34980.1	8.53e-72	232	subtilisin-like serine protease 2
GB_D06G0016	SBT5	D	D06	+	95346	98467	768	81742.1	6.48	Extracellular	31-106(1.05E-20)		103-581(4.38E-134)				348-477(7.39E-28)		665-762(1.17E-34)		AprE:[486-641(1.48E-09)]	AT1G20160.1	0	842	Subtilisin-like serine endopeptidase family protein
GB_A07G2292	SBT5	A	A07	+	88663607	88669271	769	82774.4	9.15	Extracellular	29-114(4.74E-18)		112-593(3.85E-137)				357-488(3.10E-38)		671-766(1.50E-36)			AT2G04160.1	0	583	Subtilisin-like serine endopeptidase family protein
GB_D10G2624	SBT4	D	D10	+	63692970	63735986	3521	377898	5.85	Extracellular	34-112(4.03E-22)		803-1259(4.57E-123)				1730-1853(1.23E-21)		1332-1427(9.06E-37)	3252-3424(2.64E-06)	AprE:[1832-2024(9.96E-06)]	AT3G46850.1	0	576	Subtilase family protein
GB_A10G0336	SBT5	A	A10	-	2883100	2886130	772	83648	6.85	Extracellular	26-101(2.54E-21)		107-596(7.35E-128)				364-492(7.70E-31)		672-769(2.12E-23)			AT5G45650.1	0	549	subtilase family protein
GB_D13G0300	SBT3	D	D13	-	2664528	2668664	778	83684.7	8.63	PlasmaMembrane	30-109(4.74E-23)		106-590(7.80E-137)				353-481(2.99E-25)		671-756(4.30E-28)		AprE:[493-652(3.11E-06)]	AT4G10550.1	0	573	Subtilase family protein
GB_D08G2900	SBT1	D	D08	+	67083028	67085389	763	81641.9	9.4	Chloroplast	29-106(2.73E-22)		103-578(1.32E-147)				348-473(3.67E-38)		659-756(2.76E-30)			AT2G05920.1	0	612	Subtilase family protein
GB_D05G2099	SBT1	D	D05	-	18052816	18054168	377	40922.1	9.04	Mitochondrial				110-184(8.73E-26)					265-370(2.53E-31)		fusolisin superfamily:[150-230(1.196E-03)]	AT5G67090.1	7.33e-65	221	Subtilisin-like serine endopeptidase family protein
GB_D12G1238	SBT1	D	D12	+	37445298	37448560	761	81678.3	7.26	Mitochondrial	30-113(2.86E-12)		112-573(7.92E-143)				350-469(7.94E-34)		657-758(1.12E-27)			AT1G01900.1	0	845	subtilase family protein
GB_D11G2177	SBT1	D	D11	-	26443311	26445596	761	80658.4	6.26	Chloroplast	33-108(1.05E-20)		105-577(2.54E-150)				346-472(1.49E-41)		658-758(1.65E-35)		AprE:[481-638(1.44E-08)]	AT5G67360.1	0	650	Subtilase family protein
GB_D05G2100	SBT1	D	D05	-	18055528	18057807	759	81149.9	5.71	PlasmaMembrane	28-109(9.19E-19)		106-563(1.78E-129)				345-457(1.48E-13)		643-740(7.84E-30)			AT5G67090.1	0	548	Subtilisin-like serine endopeptidase family protein
GB_D03G1907	SBT2	D	D03	-	52942393	52948359	1217	132356	9.13	PlasmaMembrane	52-115(1.96E-06)		115-631(1.09E-98)	515-612(3.43E-12)			372-507(3.66E-09)		713-805(5.11E-21)		PGG superfamily:[1078-1187(9.189E-13)];Ank_2:[911-1002(4.656E-11)];Ank_2 superfamily:[811-893(9.359E-07)];fusolisin superfamily:[595-676(9.26E-04)]	AT4G30020.1	0	608	PA-domain containing subtilase family protein
GB_A08G0299	SBT5	A	A08	+	2863506	2866463	788	85415.4	8.7	PlasmaMembrane	29-116(2.26E-16)		114-380(6.55E-99)	529-635(2.29E-06)			387-518(6.24E-36)		688-785(1.08E-41)			AT5G59810.1	0	779	Subtilase family protein
GB_A11G2044	SBT1	A	A11	-	30823275	30824435	386	42436.8	8.97	Chloroplast				122-196(1.11E-22)			18-90(3.63E-06)		274-378(1.88E-31)			AT5G67090.1	4.25e-92	293	Subtilisin-like serine endopeptidase family protein
GB_A05G2076	SBT1	A	A05	-	20107892	20108724	235	25691.6	9.69	Mitochondrial				4-142(1.01E-38)				149-202(1.92E-02)				AT2G05920.1	7.92e-36	136	Subtilase family protein
GB_A06G1527	SBT5	A	A06	-	87305328	87312996	778	82900.1	9.01	Chloroplast	25-101(1.68E-21)		106-600(6.36E-139)				368-494(4.44E-39)		677-775(1.42E-26)		AprE:[511-660(1.03E-07)]	AT5G45650.1	0	552	subtilase family protein
GB_D05G2668	SBT1	D	D05	-	24809161	24811449	762	82234.1	5.48	PlasmaMembrane	30-115(3.24E-15)		112-571(3.76E-135)				350-466(6.80E-08)		650-755(1.92E-37)		AprE:[477-630(1.86E-08)]	AT5G67090.1	0	538	Subtilisin-like serine endopeptidase family protein
GB_A08G0217	SBT2	A	A08	+	1952795	1958073	818	87330.6	7.68	PlasmaMembrane	65-128(3.46E-16)		131-634(3.22E-119)				379-515(1.47E-14)		720-813(1.11E-21)		T7SS_mycosin superfamily:[523-675(2.27E-10)]	AT2G19170.1	0	634	subtilisin-like serine protease 3
GB_D10G0341	SBT5	D	D10	-	2830799	2833821	773	83823.1	6.72	Extracellular	26-101(7.04E-22)		107-597(1.88E-126)				364-493(5.81E-30)		673-770(1.44E-24)			AT5G45650.1	0	538	subtilase family protein
GB_A08G2859	SBT6	A	A08	-	119672385	119677065	1029	115160	6.45	PlasmaMembrane						193-449(0.00E+00)						AT5G19660.1	0	1602	SITE-1 protease
GB_D05G2101	SBT1	D	D05	+	18059300	18061552	750	81000.8	5.45	Extracellular	33-111(6.85E-17)		110-571(2.06E-129)				344-454(1.02E-11)		649-747(8.26E-24)		AprE:[469-632(4.51E-10)]	AT5G67360.1	0	541	Subtilase family protein
GB_A10G2665	SBT4	A	A10	+	109003847	109024376	2108	226172	5.65	PlasmaMembrane	686-762(2.32E-17)		69-524(1.55E-122)				299-422(8.16E-22)		2001-2102(1.95E-33)			AT5G59190.1	0	568	subtilase family protein
GB_D11G0101	SBT6	D	D11	-	934405	948076	1310	144820	5.86	Cytoplasmic					39-521(00.00E+00)						TPPII :[820-1005(3.45E-80)];Spc7 superfamily:[1069-1212(2.56E-05)];FbpA superfamily:[160-207(2.63E-03)]	AT4G20850.1	0	2031	tripeptidyl peptidase ii
GB_A13G2332	SBT1	A	A13	-	108005226	108007639	760	80848	8.97	Chloroplast	23-100(1.63E-21)		97-576(3.39E-145)				346-469(5.43E-38)		657-754(1.86E-30)		AprE:[476-637(1.03E-07)]	AT2G05920.1	0	613	Subtilase family protein
GB_D07G2252	SBT5	D	D07	+	50906483	50912119	769	82643.4	9.25	Extracellular	29-114(2.85E-18)		112-593(6.86E-136)				357-488(3.45E-38)		671-766(1.70E-26)			AT2G04160.1	0	565	Subtilisin-like serine endopeptidase family protein
GB_D11G2099	SBT1	D	D11	-	24297325	24299634	769	83744	6.75	PlasmaMembrane	32-118(1.11E-16)		115-574(9.58E-123)				356-468(3.28E-11)		652-756(2.06E-29)			AT5G67090.1	0	687	Subtilisin-like serine endopeptidase family protein
GB_D13G2282	SBT1	D	D13	-	56656001	56658414	760	80680.6	8.86	Chloroplast	23-100(7.22E-24)		97-576(1.16E-145)				346-469(3.36E-37)		657-754(9.29E-32)		AprE:[476-637(1.60E-07)]	AT2G05920.1	0	617	Subtilase family protein
GB_D06G1641	SBT5	D	D06	+	48072236	48079356	779	82961.1	9	Chloroplast	26-102(3.42E-22)		107-601(3.98E-139)				369-495(1.40E-38)		678-776(8.25E-28)		AprE:[512-661(2.38E-07)]	AT5G45650.1	0	544	subtilase family protein
GB_A09G0673	SBT1	A	A09	-	34600953	34603289	778	83461.2	8.51	Chloroplast	33-118(9.34E-24)		115-592(3.88E-148)				357-487(1.98E-37)		674-772(7.47E-38)		fusolisin superfamily:[556-637(6.654E-03)]	AT5G51750.1	0	645	subtilase 1.3
GB_D08G2114	SBT1	D	D08	+	58670935	58673178	747	78907.5	5.48	Extracellular	42-120(1.85E-14)		117-567(8.11E-136)				341-466(4.37E-39)		647-744(5.13E-38)			AT1G04110.1	0	571	Subtilase family protein
GB_A12G0219	SBT1	A	A12	+	3093542	3095671	641	69824.1	5.46	PlasmaMembrane			78-511(2.20E-137)					358-405(6.70E-03)	589-634(8.02E-13)			AT4G34980.1	6.16e-165	491	subtilisin-like serine protease 2
GB_A05G1136	SBT2	A	A05	-	10520541	10527007	847	90790.7	6.71	PlasmaMembrane	99-155(3.74E-12)		155-662(6.04E-122)				401-536(3.79E-13)		749-839(9.03E-19)		AprE:[551-703(2.42E-06)]	AT4G20430.1	0	1149	Subtilase family protein
GB_D12G1236	SBT1	D	D12	+	37430069	37432546	775	83139.2	8.13	Chloroplast	37-123(3.38E-13)		122-590(3.06E-139)				365-486(3.05E-27)		671-772(2.65E-40)			AT1G01900.1	0	759	subtilase family protein
GB_D10G2623	SBT4	D	D10	+	63683867	63689551	740	79488.7	5.43	PlasmaMembrane	34-112(2.30E-23)		110-565(1.29E-123)				339-462(2.07E-13)		638-734(1.65E-37)			AT3G46850.1	0	561	Subtilase family protein
GB_A05G1423	SBT1	A	A05	+	13327279	13329585	768	81246.8	6.26	Extracellular	27-104(1.42E-19)		102-573(3.62E-133)				346-467(1.90E-33)		656-758(1.06E-39)		AprE:[474-630(5.47E-09)]	AT3G14067.1	0	615	Subtilase family protein
GB_D05G0918	SBT4	D	D05	-	7676878	7679892	740	79185.3	9.01	Chloroplast	37-111(1.00E-17)		110-560(2.41E-125)				338-456(5.06E-20)		633-731(4.02E-34)			AT5G59120.1	0	659	subtilase 4.13
GB_D11G0910	SBT4	D	D11	+	7368580	7371856	748	80298.1	9.08	PlasmaMembrane	37-114(2.23E-17)		111-568(7.24E-130)				343-466(1.25E-14)		644-743(4.51E-30)			AT4G00230.1	0	587	xylem serine peptidase 1
GB_D13G2555	SBT4	D	D13	-	59706250	59709019	581	64738.2	5.89	Cytoplasmic				39-358(9.94E-43)					425-543(1.53E-18)			AT4G00230.1	4.69e-40	157	xylem serine peptidase 1
GB_A08G0013	SBT4	A	A08	+	90471	95620	990	107749	9	PlasmaMembrane	33-110(4.94E-19)		107-559(7.96E-129)				330-449(5.78E-20)	903-966(9.48E-03)	633-731(7.58E-32)			AT5G59100.1	0	667	Subtilisin-like serine endopeptidase family protein
GB_D13G1464	SBT3	D	D13	+	40684157	40686160	126	13505.5	6.4	Extracellular	43-119(1.48E-17)											AT1G71950.1	4.06e-15	73.6	Proteinase inhibitor%2C propeptide
GB_D08G0020	SBT4	D	D08	-	123954	130408	1434	153521	6.91	PlasmaMembrane	33-110(7.51E-19)		809-1252(4.91E-125)	1030-1149(1.39E-21)				627-725(1.64E-29)				AT5G59100.1	0	650	Subtilisin-like serine endopeptidase family protein
GB_scaffold13001_objG0001	SBT4	unkown	scaffold13001_obj	-	3153	4129	89	9817.57	8.71	Extracellular	36-89(3.54E-08)											AT5G58840.2	4.42e-07	48.9	Subtilase family protein
