# Supplementary material for: Genome-Wide Investigation and Co-Expression Network Analysis of SBT Family Gene in Gossypium
Source: Int J Mol Sci. 2023 Mar 17;24(6):5760. doi: 10.3390/ijms24065760 (PMC10056545; doi:10.3390/ijms24065760)
Supplement: Supplementary file 1 [file ijms-24-05760-s001.zip › TableS2.xlsx]

## Sheet: G.hirsutum
Duplicated gene 1	Duplicated gene 2	Subfamily	Ka	Ks	Ka/Ks	Purifying selection	Duplicate type	Age(MYA)	pS	blastp score	blastp e-value	block score	block e-value
Gh_A02G0839	Gh_A05G1808	SBT1	0.119822	0.486628	0.246229	Yes	Segmental	93.5823	0.35801	1221	0	2050	3.1e-157
Gh_A02G0947	Gh_A12G2187	SBT3	0.403232	1.78351	0.226089	Yes	Segmental	342.982	0.680449	803	0	450	3.8e-18
Gh_A02G0839	Gh_D02G0889	SBT1	0.0116927	0.0338437	0.345492	Yes	Segmental	6.5084	0.0330914	1533	0	35050	0
Gh_A02G0947	Gh_D03G0815	SBT3	0.0162122	0.0450276	0.360049	Yes	Segmental	8.65915	0.0437026	1497	0	5050	0
Gh_A02G0839	Gh_D05G2004	SBT1	0.119592	0.484392	0.24689	Yes	Segmental	93.1523	0.35684	1216	0	1300	6.2e-87
Gh_A02G0947	Gh_D12G2367	SBT3	0.400491	1.81225	0.22099	Yes	Segmental	348.51	0.683064	810	0	500	6e-25
Gh_A03G0178	Gh_D03G1406	SBT3	0.0111958	0.0391057	0.286297	Yes	Segmental	7.52033	0.0381037	1563	0	18650	0
Gh_A04G0029	Gh_D05G3705	SBT5	0.0109728	0.0719113	0.152588	Yes	Segmental	13.8291	0.0685714	1548	0	13700	0
Gh_A05G1761	Gh_A06G0170	SBT1	0.426064	NaN	NaN	No	Segmental		0.791085	752	0	2800	4e-216
Gh_A05G1582	Gh_A06G0020	SBT5	0.146813	0.572909	0.256259	Yes	Segmental	110.175	0.400608	962	0	750	1.3e-40
Gh_A05G1760	Gh_A06G0170	SBT1	0.186202	0.904107	0.205952	Yes	Segmental	173.867	0.525338	512	2e-176	200	0.00047
Gh_A05G0169	Gh_A08G2147	SBT6	0.0682179	0.470568	0.144969	Yes	Segmental	90.4938	0.349526	1847	0	1200	3.9e-75
Gh_A05G1176	Gh_A10G0470	SBT1	0.0644716	0.755284	0.0853608	Yes	Segmental	145.247	0.476027	1375	0	2400	8e-178
Gh_A05G1808	Gh_D02G0889	SBT1	0.117028	0.474487	0.246641	Yes	Segmental	91.2475	0.351613	1224	0	3600	1.7e-305
Gh_A05G0169	Gh_D05G0233	SBT6	0.00888179	0.0448156	0.198185	Yes	Segmental	8.61838	0.0435029	2103	0	34750	0
Gh_A05G0776	Gh_D05G0906	SBT4	0.0639774	0.11896	0.537808	Yes	Segmental	22.8768	0.110005	1230	0	34750	0
Gh_A05G1162	Gh_D05G1339	SBT1	0.0081693	0.03705	0.220494	Yes	Segmental	7.125	0.0361498	1533	0	34450	0
Gh_A05G1582	Gh_D05G1759	SBT5	0.0385401	0.0574987	0.670277	Yes	Segmental	11.0574	0.0553499	1209	0	34450	0
Gh_A05G1761	Gh_D05G1955	SBT1	0.0116984	0.0238406	0.490693	Yes	Segmental	4.58474	0.0234657	1506	0	34450	0
Gh_A05G1762	Gh_D05G1956	SBT1	0.00555044	0.0356007	0.155908	Yes	Segmental	6.84629	0.034769	1527	0	34450	0
Gh_A05G1808	Gh_D05G2004	SBT1	0.00815938	0.0408264	0.199855	Yes	Segmental	7.85123	0.0397351	1546	0	34450	0
Gh_A05G1762	Gh_D05G2497	SBT1	0.544499	6.17273	0.0882104	Yes	Segmental	1187.06	0.7498	593	0	1400	2.6e-88
Gh_A05G1581	Gh_D05G1759	SBT5	0.027484	0.0284394	0.966405	Yes	Segmental	5.46912	0.027907	190	6e-58	250	6.1e-06
Gh_A05G1760	Gh_D06G0158	SBT1	0.207529	0.886684	0.23405	Yes	Segmental	170.516	0.520058	389	4e-129	4550	0
Gh_A05G1761	Gh_D06G0164	SBT1	0.415646	NaN	NaN	No	Segmental		0.777012	753	0	200	0.0018
Gh_A05G0169	Gh_D08G2514	SBT6	0.071627	0.464271	0.154278	Yes	Segmental	89.2829	0.346149	1839	0	1550	2.7e-104
Gh_A05G1176	Gh_D10G0493	SBT1	0.0619995	0.743605	0.0833769	Yes	Segmental	143.001	0.471728	1383	0	3550	7.8e-287
Gh_A05G1808	Gh_D11G2004	SBT1	0.245808	NaN	NaN	No	Segmental		0.766074	1063	0	550	3.4e-25
Gh_A05G1162	Gh_D10G2586	SBT1	0.0922725	0.564438	0.163477	Yes	Segmental	108.546	0.396639	1289	0	150	0.072
Gh_A06G0170	Gh_D05G1955	SBT1	0.419351	NaN	NaN	No	Segmental		0.792364	769	0	3200	9.9e-252
Gh_A06G0166	Gh_D05G2497	SBT1	0.170033	0.838071	0.202886	Yes	Segmental	161.167	0.50466	1123	0	1250	1.5e-80
Gh_A06G0020	Gh_D05G1759	SBT5	0.134397	0.532511	0.252383	Yes	Segmental	102.406	0.381272	1153	0	1050	1.3e-60
Gh_A06G0166	Gh_D06G0158	SBT1	0.0138503	0.0502869	0.275425	Yes	Segmental	9.67056	0.0486381	1465	0	55450	0
Gh_A06G0170	Gh_D06G0164	SBT1	0.00860553	0.0341669	0.251868	Yes	Segmental	6.57056	0.0334003	1543	0	55450	0
Gh_A06G1331	Gh_D06G1660	SBT2	0.0125054	0.0499838	0.250189	Yes	Segmental	9.61227	0.0483546	1635	0	55450	0
Gh_A06G1461	Gh_D06G1794	SBT4	0.025187	0.0612585	0.411158	Yes	Segmental	11.7805	0.0588235	1382	0	55450	0
Gh_A06G1462	Gh_D06G1795	SBT4	0.040479	0.0708627	0.571231	Yes	Segmental	13.6274	0.067618	720	0	55450	0
Gh_A06G0170	Gh_D06G0158	SBT1	0.0778204	0.269408	0.288857	Yes	Segmental	51.8092	0.226329	1293	0	1100	2.1e-67
Gh_A06G1462	Gh_D06G1794	SBT4	0.193187	0.808237	0.239023	Yes	Segmental	155.43	0.494704	1016	0	550	4.5e-23
Gh_A06G1461	Gh_D06G1795	SBT4	0.219944	0.860965	0.255462	Yes	Segmental	165.57	0.512036	534	0	400	4.4e-13
Gh_A06G1462	Gh_D06G2361	SBT4	0.192575	0.806001	0.238926	Yes	Segmental	155	0.493942	1001	0	550	4.7e-23
Gh_A07G1757	Gh_A11G1366	SBT5	0.106233	0.528531	0.200997	Yes	Segmental	101.641	0.37931	1291	0	2800	1e-228
Gh_A07G0467	Gh_D07G0532	SBT1	0.00935685	0.0246858	0.379038	Yes	Segmental	4.74726	0.0242839	1529	0	55250	0
Gh_A07G1432	Gh_D07G1529	SBT1	0.00502819	0.0281022	0.178925	Yes	Segmental	5.40427	0.0275822	1612	0	55250	0
Gh_A07G1757	Gh_D07G1962	SBT5	0.00749286	0.0514277	0.145697	Yes	Segmental	9.88995	0.0497041	1566	0	26050	0
Gh_A07G1757	Gh_D11G1511	SBT5	0.102535	0.507015	0.202232	Yes	Segmental	97.5029	0.368522	1305	0	2800	2e-224
Gh_A08G1149	Gh_A11G0757	SBT4	0.113313	0.654503	0.173128	Yes	Segmental	125.866	0.436624	1169	0	1000	3.8e-61
Gh_A08G0882	Gh_A11G0092	SBT6	0.068141	0.305416	0.223109	Yes	Segmental	58.7338	0.250877	2358	0	250	8e-06
Gh_A08G2197	Gh_A13G1684	SBT1	0.081363	0.856349	0.0950115	Yes	Segmental	164.682	0.510567	1007	0	950	4.6e-51
Gh_A08G2147	Gh_D05G0233	SBT6	0.068604	0.458326	0.149684	Yes	Segmental	88.1397	0.342936	1826	0	1700	8.3e-115
Gh_A08G1149	Gh_D08G1431	SBT4	0.0129244	0.0507808	0.254513	Yes	Segmental	9.76554	0.0490998	1402	0	46900	0
Gh_A08G1591	Gh_D08G1900	SBT1	0.264574	1.65458	0.159904	Yes	Segmental	318.189	0.667404	937	0	46900	0
Gh_A08G1601	Gh_D08G1912	SBT4	0.00798411	0.0249207	0.32038	Yes	Segmental	4.79245	0.0245112	1576	0	46900	0
Gh_A08G0161	Gh_D08G0220	SBT2	0.00433547	0.0217497	0.199334	Yes	Segmental	4.18264	0.0214374	1672	0	39650	0
Gh_A08G0221	Gh_D08G0301	SBT5	0.0166846	0.0611839	0.272697	Yes	Segmental	11.7661	0.0587548	1546	0	39650	0
Gh_A08G0882	Gh_D08G1072	SBT6	0.00823423	0.0238424	0.345361	Yes	Segmental	4.58507	0.0234674	2792	0	39650	0
Gh_A08G2147	Gh_D08G2514	SBT6	0.00767816	0.0293061	0.261999	Yes	Segmental	5.63578	0.0287409	2089	0	8300	0
Gh_A08G2197	Gh_D08G2562	SBT1	0.0213745	0.115521	0.185027	Yes	Segmental	22.2156	0.107064	1121	0	8300	0
Gh_A08G1590	Gh_D08G1900	SBT1	0.00930617	0.0356007	0.261404	Yes	Segmental	6.84629	0.034769	1478	0	450	2.7e-20
Gh_A08G1149	Gh_D11G0885	SBT4	0.112284	0.649867	0.17278	Yes	Segmental	124.974	0.434681	1174	0	1150	3.9e-69
Gh_A08G0882	Gh_D11G0095	SBT6	0.0684897	0.310577	0.220524	Yes	Segmental	59.7263	0.2543	2356	0	300	8.5e-10
Gh_A09G0896	Gh_D09G0922	SBT5	0.00938784	0.0316565	0.296553	Yes	Segmental	6.08779	0.0309977	1416	0	50100	0
Gh_A09G1291	Gh_D09G1326	SBT4	0.00830089	0.046429	0.178787	Yes	Segmental	8.92865	0.0450211	1510	0	2000	1.5e-140
Gh_A10G0049	Gh_D05G1060	SBT2	0.108392	0.562698	0.192629	Yes	Segmental	108.211	0.395819	1323	0	500	8.4e-20
Gh_A10G0304	Gh_D06G1476	SBT5	0.266889	0.857443	0.311262	Yes	Segmental	164.893	0.510916	906	0	850	3.4e-43
Gh_A10G0304	Gh_D10G0306	SBT5	0.0156426	0.0484951	0.322561	Yes	Segmental	9.32598	0.0469605	1480	0	17650	0
Gh_A10G0470	Gh_D10G0493	SBT1	0.00871976	0.0439429	0.198434	Yes	Segmental	8.45055	0.0426803	1555	0	17650	0
Gh_A10G0049	Gh_D10G0056	SBT2	0.0121396	0.0471271	0.257593	Yes	Segmental	9.06291	0.045677	1679	0	7500	0
Gh_A10G2025	Gh_Sca004818G04	SBT4	0.0946949	0.462763	0.204629	Yes	Segmental	88.9929	0.345337	1224	0	150	0.12
Gh_A10G2026	Gh_Sca004818G05	SBT4	0.0694684	0.415302	0.167272	Yes	Segmental	79.8658	0.318901	1256	0	150	0.12
Gh_A10G2027	Gh_Sca004818G06	SBT4	0.166185	1.02858	0.161568	Yes	Segmental	197.803	0.559693	1059	0	150	0.12
Gh_A10G2024	Gh_Sca004818G04	SBT4	0.102919	0.433445	0.237444	Yes	Segmental	83.3548	0.329205	1195	0	150	0.12
Gh_A10G2025	Gh_Sca004818G05	SBT4	0.0459936	0.0921924	0.498888	Yes	Segmental	17.7293	0.0867513	1337	0	150	0.12
Gh_A10G2026	Gh_Sca004818G06	SBT4	0.0893235	0.416323	0.214553	Yes	Segmental	80.0621	0.319488	1170	0	150	0.12
Gh_A10G2024	Gh_Sca004818G06	SBT4	0.0342081	0.0737484	0.463848	Yes	Segmental	14.1824	0.0702385	1347	0	200	0.0018
Gh_A10G2025	Gh_Sca004818G05	SBT4	0.0459936	0.0921924	0.498888	Yes	Segmental	17.7293	0.0867513	1337	0	150	0.12
Gh_A10G2026	Gh_Sca004818G04	SBT4	0.017999	0.0591687	0.304198	Yes	Segmental	11.3786	0.0568949	1392	0	200	0.0018
Gh_A10G2027	Gh_Sca004818G03	SBT4	0.0102513	0.0760658	0.134768	Yes	Segmental	14.628	0.0723356	1434	0	200	0.0018
Gh_A10G2025	Gh_Sca004818G06	SBT4	0.131975	0.358112	0.368531	Yes	Segmental	68.8677	0.284743	1189	0	150	0.12
Gh_A10G2026	Gh_Sca004818G05	SBT4	0.0694684	0.415302	0.167272	Yes	Segmental	79.8658	0.318901	1256	0	150	0.12
Gh_A10G2027	Gh_Sca004818G04	SBT4	0.158273	0.973397	0.162598	Yes	Segmental	187.192	0.545164	1117	0	150	0.12
Gh_A11G0221	Gh_A12G2124	SBT2	0.0524648	0.241029	0.21767	Yes	Segmental	46.3517	0.206135	177	1e-59	500	2.1e-22
Gh_A11G1366	Gh_D07G1962	SBT5	0.102196	0.535632	0.190795	Yes	Segmental	103.006	0.382803	1279	0	2600	6.8e-203
Gh_A11G0757	Gh_D08G1431	SBT4	0.123474	0.666602	0.185228	Yes	Segmental	128.193	0.441639	1228	0	1100	7.9e-68
Gh_A11G0092	Gh_D08G1072	SBT6	0.067154	0.306576	0.219045	Yes	Segmental	58.9568	0.251648	2361	0	450	8.4e-19
Gh_A11G0757	Gh_D11G0885	SBT4	0.00706754	0.0264803	0.266898	Yes	Segmental	5.09236	0.0260183	1519	0	66850	0
Gh_A11G1366	Gh_D11G1511	SBT5	0.0134936	0.0370228	0.364468	Yes	Segmental	7.11977	0.0361239	1583	0	66850	0
Gh_A11G0092	Gh_D11G0095	SBT6	0.00467369	0.0296688	0.157529	Yes	Segmental	5.70553	0.0290896	2685	0	12400	0
Gh_A11G0221	Gh_D11G0235	SBT2	0.0046154	0.0456994	0.100995	Yes	Segmental	8.78835	0.044335	193	7e-66	12400	0
Gh_A11G0221	Gh_D12G2304	SBT2	0.0475407	0.304559	0.156097	Yes	Segmental	58.5691	0.250307	179	4e-60	500	2.5e-23
Gh_A12G2187	Gh_D03G0815	SBT3	0.404828	1.779	0.227559	Yes	Segmental	342.115	0.68003	800	0	350	9.6e-11
Gh_A12G2124	Gh_D11G0235	SBT2	0.0574214	0.261614	0.219489	Yes	Segmental	50.3103	0.220859	175	1e-58	550	4.3e-25
Gh_A12G0939	Gh_D12G1029	SBT1	0.0146891	0.0511623	0.287107	Yes	Segmental	9.83891	0.0494563	1523	0	60900	0
Gh_A12G0940	Gh_D12G1030	SBT1	0.014827	0.0435042	0.340818	Yes	Segmental	8.36618	0.0422665	1489	0	60900	0
Gh_A12G0941	Gh_D12G1031	SBT1	0.0300189	0.102874	0.291802	Yes	Segmental	19.7835	0.0961307	1313	0	60900	0
Gh_A12G2124	Gh_D12G2304	SBT2	0.00462607	0.0611025	0.0757101	Yes	Segmental	11.7505	0.0586797	196	6e-67	60900	0
Gh_A12G2187	Gh_D12G2367	SBT3	0.00951315	0.0239657	0.396949	Yes	Segmental	4.60878	0.0235868	1662	0	60900	0
Gh_A12G0208	Gh_D12G0210	SBT1	0.0215541	0.054701	0.394036	Yes	Segmental	10.5194	0.0527538	1338	0	10900	0
Gh_A12G0209	Gh_D12G0211	SBT1	0.0949151	0.250883	0.378324	Yes	Segmental	48.2467	0.213234	547	0	10900	0
Gh_A12G0940	Gh_D12G1029	SBT1	0.118597	0.422197	0.280904	Yes	Segmental	81.1918	0.322846	1237	0	900	7.8e-50
Gh_A12G0941	Gh_D12G1030	SBT1	0.329707	1.44519	0.22814	Yes	Segmental	277.922	0.640804	770	0	900	7.8e-50
Gh_A12G0209	Gh_D12G0210	SBT1	0.0913843	0.227025	0.40253	Yes	Segmental	43.6586	0.195884	934	0	750	8.8e-37
Gh_A12G0208	Gh_D12G0211	SBT1	0.0255979	0.0697366	0.367066	Yes	Segmental	13.4109	0.0665927	996	0	300	6.1e-08
Gh_A13G1684	Gh_D08G2562	SBT1	0.0890537	0.773118	0.115188	Yes	Segmental	148.676	0.482465	1300	0	1000	1.7e-56
Gh_A13G1017	Gh_D13G1265	SBT3	0.0141764	0.0217801	0.650889	Yes	Segmental	4.18848	0.0214669	242	5e-84	25150	0
Gh_A13G0001	Gh_D13G0016	SBT5	0.0165608	0.0394828	0.419444	Yes	Segmental	7.59285	0.0384615	1009	0	20050	0
Gh_A13G0281	Gh_D13G0300	SBT3	0.00744103	0.0210448	0.353581	Yes	Segmental	4.04707	0.0207523	1570	0	20050	0
Gh_A13G1684	Gh_Sca005023G04	SBT1	0.00763552	0.0471668	0.161883	Yes	Segmental	9.07054	0.0457143	1545	0	200	0.001
Gh_D02G0889	Gh_D05G2004	SBT1	0.116799	0.472282	0.247308	Yes	Segmental	90.8234	0.35044	1221	0	3300	5.3e-269
Gh_D03G0815	Gh_D12G2367	SBT3	0.402081	1.82771	0.219992	Yes	Segmental	351.482	0.684429	817	0	300	2.8e-08
Gh_D05G1956	Gh_D05G2497	SBT1	0.545846	3.1268	0.17457	Yes	Segmental	601.308	0.7384	589	0	3600	3.1e-292
Gh_D05G2497	Gh_D06G0164	SBT1	0.160099	0.818404	0.195623	Yes	Segmental	157.385	0.498141	1173	0	950	1.2e-51
Gh_D05G1955	Gh_D06G0164	SBT1	0.409022	NaN	NaN	No	Segmental		0.778333	772	0	300	2.7e-08
Gh_D05G0233	Gh_D08G2514	SBT6	0.0720143	0.452081	0.159295	Yes	Segmental	86.9386	0.339532	1822	0	2100	2.6e-148
Gh_D05G1060	Gh_D10G0056	SBT2	0.110792	0.572461	0.193536	Yes	Segmental	110.089	0.400399	1315	0	500	2.1e-20
Gh_D05G2004	Gh_D11G2004	SBT1	0.246417	NaN	NaN	No	Segmental		0.768296	1058	0	600	1e-27
Gh_D05G1060	Gh_A05G3884	SBT2	0.00385039	0.0222746	0.17286	Yes	Segmental	4.28358	0.0219471	1632	0	450	4.1e-16
Gh_D05G1339	Gh_D10G2586	SBT1	0.0925955	0.540945	0.171174	Yes	Segmental	104.028	0.385396	1285	0	150	0.078
Gh_D06G1476	Gh_D10G0306	SBT5	0.266682	0.847532	0.314657	Yes	Segmental	162.987	0.507735	953	0	750	5.3e-36
Gh_D07G1962	Gh_D11G1511	SBT5	0.0985188	0.513946	0.191691	Yes	Segmental	98.8358	0.372031	1313	0	2850	3e-225
Gh_D08G1431	Gh_D11G0885	SBT4	0.121803	0.662174	0.183944	Yes	Segmental	127.341	0.439813	1226	0	1350	2.7e-84
Gh_D08G1072	Gh_D11G0095	SBT6	0.0675045	0.311765	0.216524	Yes	Segmental	59.9547	0.255085	2353	0	550	1.8e-25
Gh_D08G0012	Gh_A08G2564	SBT4	0.0649459	0.124463	0.521807	Yes	Segmental	23.9353	0.114684	1141	0	950	7e-48
Gh_D08G0013	Gh_A08G2565	SBT4	0.0487453	0.0883691	0.55161	Yes	Segmental	16.9941	0.0833616	1835	0	950	7e-48
Gh_D08G0019	Gh_A08G2570	SBT4	0.179706	0.285077	0.630378	Yes	Segmental	54.8225	0.237157	260	2e-80	950	7e-48
Gh_D08G0018	Gh_A08G2570	SBT4	0.0266543	0.069255	0.384871	Yes	Segmental	13.3183	0.0661537	2443	0	150	0.056
Gh_D08G0020	Gh_A08G2564	SBT4	0.0980871	0.188944	0.519132	Yes	Segmental	36.3355	0.167023	1151	0	150	0.056
Gh_D11G0235	Gh_D12G2304	SBT2	0.0524648	0.282779	0.185533	Yes	Segmental	54.3806	0.235583	176	3e-59	550	9e-26
Gh_D11G1939	Gh_A11G3111	SBT1	0.0109231	0.0280173	0.389869	Yes	Segmental	5.38794	0.0275004	1466	0	150	0.11
Gh_A10G2239	Gh_D10G2586	SBT1	0.0139701	0.0266458	0.524291	Yes	Segmental	5.12419	0.026178	1526	0	200	0.00064
Gh_Sca004818G01	Gh_Sca004818G04	SBT4	0.254646	1.45434	0.175094	Yes	Segmental	279.68	0.642127	976	0	150	0.12
Gh_Sca004818G02	Gh_Sca004818G05	SBT4	0.230252	1.39474	0.165086	Yes	Segmental	268.22	0.633205	960	0	150	0.12
Gh_Sca004818G03	Gh_Sca004818G06	SBT4	0.164827	0.943597	0.174679	Yes	Segmental	181.461	0.536861	1058	0	150	0.12
Gh_A06G1461	Gh_A06G1462	SBT4	0.196862	0.789229	0.249436	Yes	Tandem	151.775	0.488151
Gh_A08G1590	Gh_A08G1591	SBT1	0.267613	1.594	0.167888	Yes	Tandem	306.538	0.660455
Gh_A10G2024	Gh_A10G2025	SBT4	0.117717	0.320629	0.367144	Yes	Tandem	61.6594	0.260899
Gh_A10G2025	Gh_A10G2026	SBT4	0.108214	0.487033	0.22219	Yes	Tandem	93.6601	0.358222
Gh_A12G0208	Gh_A12G0209	SBT1	0.0763432	0.219497	0.34781	Yes	Tandem	42.211	0.190295
Gh_A12G0939	Gh_A12G0940	SBT1	0.117071	0.416602	0.281015	Yes	Tandem	80.1157	0.319648
Gh_D06G1794	Gh_D06G1795	SBT4	0.21155	0.935977	0.22602	Yes	Tandem	179.996	0.534685
Gh_D08G0018	Gh_D08G0019	SBT4	0.182793	0.285077	0.641207	Yes	Tandem	54.8225	0.237157
Gh_D12G0210	Gh_D12G0211	SBT1	0.0226807	0.0383542	0.591348	Yes	Tandem	7.37581	0.03739
Gh_D12G1029	Gh_D12G1030	SBT1	0.116088	0.410117	0.28306	Yes	Tandem	78.8687	0.315911
Gh_D12G1030	Gh_D12G1031	SBT1	0.323864	1.48794	0.217659	Yes	Tandem	286.143	0.646854
Gh_Sca004818G01	Gh_Sca004818G02	SBT4	0.221831	1.52755	0.14522	Yes	Tandem	293.76	0.652159
Gh_Sca004818G03	Gh_Sca004818G04	SBT4	0.155057	0.979504	0.158301	Yes	Tandem	188.366	0.546825
Gh_Sca004818G04	Gh_Sca004818G05	SBT4	0.0587445	0.390582	0.150402	Yes	Tandem	75.1119	0.304455
Gh_Sca004818G05	Gh_Sca004818G06	SBT4	0.0631787	0.245771	0.257063	Yes	Tandem	47.2637	0.209563
Note: NaN is high sequence divergence Value (pS>=0.75)

## Sheet: G.arboreum
Duplicated gene 1	Duplicated gene 2	Subfamily	Ka	Ks	Ka/Ks	Purifying selection	Duplicate type	Age(MYA)	pS	blastp score	blastp e-value	block score	block e-value
Cotton_A_28742	Cotton_A_23202	SBT2	0.0574214	0.241029	0.238234	Yes	Segmental	46.3517	0.206135	175	6e-59	250	1.3e-06
Cotton_A_19912	Cotton_A_27395	SBT1/SBT3	0.53947	4.62675	0.116598	Yes	Segmental	889.759	0.74843	425	2e-139	150	0.002
Cotton_A_37979	Cotton_A_03725	SBT5	0.100129	0.556427	0.17995	Yes	Segmental	107.005	0.392845	1017	0	150	0.074
Cotton_A_16655	Cotton_A_08667	SBT1	0.531613	NaN	NaN	No	Segmental		0.752455	591	0	600	4.5e-30
Cotton_A_16655	Cotton_A_08666	SBT1	0.397051	NaN	NaN	No	Segmental		0.787756	769	0	250	3.6e-06
Cotton_A_08666	Cotton_A_24355	SBT1	0.446751	2.0502	0.217907	Yes	Segmental	394.269	0.701261	643	0	250	5.8e-07
Cotton_A_16655	Cotton_A_24355	SBT1	0.358383	2.12746	0.168456	Yes	Segmental	409.128	0.706032	764	0	150	0.04
Cotton_A_18954	Cotton_A_03171	SBT1	0.464919	NaN	NaN	No	Segmental		0.800989	735	0	150	0.074
Cotton_A_04621	Cotton_A_06799	SBT5	0.46044	1.66444	0.276634	Yes	Segmental	320.084	0.668482	123	2e-32	150	0.053
Cotton_A_02647	Cotton_A_18889	SBT1	0.0901257	0.551601	0.163389	Yes	Segmental	106.077	0.390539	1289	0	1100	1.5e-67
Cotton_A_04621	Cotton_A_03725	SBT5	0.508814	NaN	NaN	No	Segmental		0.75259	120	3e-31	200	0.00078
Cotton_A_08666	Cotton_A_10767	SBT1	0.473321	NaN	NaN	No	Segmental		0.75647	445	2e-148	350	3.4e-12
Cotton_A_08667	Cotton_A_10766	SBT1	0.478909	3.99084	0.120002	Yes	Segmental	767.469	0.746335	639	0	350	3.4e-12
Cotton_A_23202	Cotton_A_13261	SBT2	0	0	NaN	No	Segmental	0	0	197	8e-68	300	6e-08
Cotton_A_16655	Cotton_A_10766	SBT1	0.436746	3.0636	0.142559	Yes	Segmental	589.155	0.73738	660	0	150	0.077
Cotton_A_13495	Cotton_A_22974	SBT4	0.294475	1.74138	0.169104	Yes	Segmental	334.881	0.676431	855	0	450	1.9e-20
Cotton_A_13490	Cotton_A_22973	SBT4	0.307632	1.71306	0.179581	Yes	Segmental	329.434	0.673599	855	0	450	1.9e-20
Cotton_A_08666	Cotton_A_14893	SBT1	0.410499	NaN	NaN	No	Segmental		0.784663	747	0	1000	2.6e-57
Cotton_A_16655	Cotton_A_14893	SBT1	0.158006	0.839954	0.188112	Yes	Segmental	161.53	0.505275	1108	0	500	3e-21
Cotton_A_18954	Cotton_A_08556	SBT1	0.0644393	0.743162	0.0867096	Yes	Segmental	142.916	0.471563	1392	0	800	2.1e-43
Cotton_A_15053	Cotton_A_10230	SBT2	0.0934408	0.553835	0.168716	Yes	Segmental	106.507	0.391608	1382	0	350	1.4e-10
Cotton_A_13434	Cotton_A_00534	SBT4	0.239478	1.01138	0.236783	Yes	Segmental	194.496	0.55528	120	4e-33	350	5.1e-12
Cotton_A_11161	Cotton_A_14510	SBT6	0.0632895	0.47714	0.132643	Yes	Segmental	91.7577	0.35302	1630	0	750	2.4e-40
Cotton_A_18231	Cotton_A_16445	SBT5	0.138744	0.532122	0.260737	Yes	Segmental	102.331	0.381081	1131	0	850	1.3e-43
Cotton_A_03171	Cotton_A_11860	SBT1	0.0894302	0.818495	0.109262	Yes	Segmental	157.403	0.498172	1263	0	250	1.1e-05
Cotton_A_24355	Cotton_A_14888	SBT1	0.355037	2.76704	0.128309	Yes	Segmental	532.123	0.73126	805	0	200	0.00055
Cotton_A_00534	Cotton_A_09951	SBT4	0.679464	2.44932	0.277409	Yes	Segmental	471.023	0.721374	57	8e-11	150	0.068
Cotton_A_11860	Cotton_A_18889	SBT1	0.451884	2.37908	0.18994	Yes	Segmental	457.516	0.718564	754	0	200	2.5e-05
Cotton_A_22944	Cotton_A_10948	SBT4	0.113265	0.66112	0.171324	Yes	Segmental	127.138	0.439377	1215	0	150	0.013
Cotton_A_03375	Cotton_A_03376	SBT1	0.115996	0.424704	0.273123	Yes	Tandem	81.6738	0.324272
Cotton_A_03376	Cotton_A_03377	SBT1	0.317926	1.44826	0.219524	Yes	Tandem	278.511	0.641248
Cotton_A_08666	Cotton_A_08667	SBT1	0.509959	NaN	NaN	No	Tandem	NaN	0.784588
Cotton_A_09951	Cotton_A_09950	SBT1	0.268491	1.59856	0.167958	Yes	Tandem	307.416	0.660998
Cotton_A_10766	Cotton_A_10767	SBT1	0.0629325	0.207242	0.303666	Yes	Tandem	39.8543	0.181074
Cotton_A_13489	Cotton_A_13488	SBT4	0.134601	0.237212	0.567429	Yes	Tandem	45.6177	0.20336
Cotton_A_13490	Cotton_A_13489	SBT4	0.006686	0.0074657	0.895562	Yes	Tandem	1.43571	0.00742867
Cotton_A_13496	Cotton_A_13495	SBT4	0.00213384	0.00884151	0.241343	Yes	Tandem	1.70029	0.0087896
Cotton_A_13498	Cotton_A_13497	SBT4	0.162653	0.938899	0.173238	Yes	Tandem	180.558	0.535522
Cotton_A_22974	Cotton_A_22973	SBT4	0.192123	0.795119	0.241628	Yes	Tandem	152.907	0.490199
Cotton_A_26115	Cotton_A_26114	SBT4	0.110087	0.234672	0.469107	Yes	Tandem	45.1293	0.201506
Cotton_A_26116	Cotton_A_26115	SBT4	0.204524	0.352988	0.579407	Yes	Tandem	67.8824	0.281553
Cotton_A_26124	Cotton_A_26123	SBT4	0.220023	0.363307	0.605611	Yes	Tandem	69.8667	0.287954
Note: NaN is high sequence divergence Value (pS>=0.75)

## Sheet: G.raimondii
Duplicated gene 1	Duplicated gene 2	Subfamily	Ka	Ks	Ka/Ks	Purifying selection	Duplicate type	Age(MYA)	pS	blastp score	blastp e-value	block score	block e-value
Gorai.001G224300.1	Gorai.007G164000.1	SBT5	0.102117	0.505429	0.202041	Yes	Segmental	97.1978	0.367714	1288	0	1650	2.8e-112
Gorai.003G074100.1	Gorai.008G260500.1	SBT3	0.405849	1.8687	0.217183	Yes	Segmental	359.365	0.687917	812	0	500	8.2e-20
Gorai.004G118400.1	Gorai.007G011200.1	SBT6	0.0887219	0.382426	0.231998	Yes	Segmental	73.5435	0.299584	585	0	400	2.4e-15
Gorai.004G205700.1	Gorai.008G115600.1	SBT1	0.465805	NaN	NaN	No	Segmental		0.767274	458	6e-154	350	1.4e-12
Gorai.004G280300.1	Gorai.009G025200.1	SBT6	0.0709257	0.447828	0.158377	Yes	Segmental	86.1207	0.337197	1826	0	700	5.7e-34
Gorai.005G099900.1	Gorai.009G218000.1	SBT1	0.117589	0.481897	0.244013	Yes	Segmental	92.6724	0.355529	1224	0	1100	1.5e-65
Gorai.007G025800.1	Gorai.008G253500.1	SBT2	0.0524648	0.261614	0.200543	Yes	Segmental	50.3103	0.220859	177	2e-59	650	2e-30
Gorai.007G221100.1	Gorai.009G218000.1	SBT1	0.229148	NaN	NaN	No	Segmental		0.769288	1057	0	500	1.9e-21
Gorai.007G214100.1	Gorai.009G213500.1	SBT1	0.433345	2.00958	0.215639	Yes	Segmental	386.458	0.698549	709	0	500	1.3e-22
Gorai.007G164000.1	Gorai.009G453100.1	SBT5	0.280803	1.80433	0.155627	Yes	Segmental	346.986	0.682353	1014	0	150	0.1
Gorai.007G214100.1	Gorai.010G021600.1	SBT1	0.360314	2.32244	0.155144	Yes	Segmental	446.624	0.716098	857	0	200	0.00014
Gorai.008G024400.1	Gorai.009G213600.1	SBT1	0.473063	3.14667	0.150337	Yes	Segmental	605.13	0.738703	473	2e-158	200	0.00059
Gorai.009G213600.1	Gorai.009G275900.1	SBT1	0.541973	3.37128	0.160762	Yes	Segmental	648.323	0.741627	550	0	150	0.011
Gorai.009G192600.1	Gorai.010G002100.1	SBT5	0.755509	NaN	NaN	No	Segmental		0.854956	319	3e-100	7850	0
Gorai.009G213500.1	Gorai.010G021100.1	SBT1	0.461059	NaN	NaN	No	Segmental		0.770439	492	9e-167	7850	0
Gorai.009G275900.1	Gorai.010G021600.1	SBT1	0.157701	0.827055	0.190677	Yes	Segmental	159.049	0.50103	1143	0	450	2.7e-16
Gorai.009G116500.1	Gorai.011G006000.1	SBT2	0.0971335	0.557949	0.17409	Yes	Segmental	107.298	0.393569	1410	0	400	3.1e-14
Gorai.009G147400.1	Gorai.011G056000.1	SBT1	0.0657774	0.748043	0.0879327	Yes	Segmental	143.854	0.473369	1376	0	700	1.1e-33
Gorai.009G146000.1	Gorai.011G061400.1	SBT1	0.0939275	0.545581	0.172161	Yes	Segmental	104.919	0.387642	1266	0	550	3.2e-24
Gorai.009G095600.1	Gorai.011G272300.1	SBT4	0.452003	NaN	NaN	No	Segmental		0.758512	643	0	150	0.1
Gorai.010G021100.1	Gorai.010G021600.1	SBT1	0.118193	0.26794	0.441119	Yes	Segmental	51.5268	0.225303	909	0	150	0.11
Gorai.010G200100.1	Gorai.011G272100.1	SBT4	0.334215	2.78743	0.119901	Yes	Segmental	536.044	0.731762	233	1e-72	150	0.12
Gorai.010G200200.1	Gorai.011G272300.1	SBT4	0.319698	4.57854	0.0698253	Yes	Segmental	880.489	0.748326	595	0	150	0.12
Gorai.010G200300.1	Gorai.011G272500.1	SBT4	0.287386	1.68942	0.170109	Yes	Segmental	324.889	0.671153	895	0	150	0.12
Gorai.010G200100.1	Gorai.011G272000.1	SBT4	0.342236	3.38454	0.101117	Yes	Segmental	650.873	0.741774	231	7e-72	150	0.12
Gorai.010G200200.1	Gorai.011G272100.1	SBT4	0.311308	1.93831	0.160608	Yes	Segmental	372.752	0.69342	612	0	150	0.12
Gorai.010G200300.1	Gorai.011G272300.1	SBT4	0.314305	1.89438	0.165915	Yes	Segmental	364.303	0.690006	866	0	150	0.12
Gorai.010G163700.1	Gorai.011G035300.1	SBT5	0.265927	0.836898	0.317753	Yes	Segmental	160.942	0.504276	960	0	1000	3.4e-56
Gorai.010G199900.1	Gorai.011G272500.1	SBT4	0.281035	1.90271	0.147703	Yes	Segmental	365.905	0.690669	654	0	200	0.00016
Gorai.010G200300.1	Gorai.011G272100.1	SBT4	0.306769	1.85647	0.165243	Yes	Segmental	357.014	0.686896	901	0	200	0.00016
Gorai.011G272000.1	Gorai.011G272300.1	SBT4	0.164046	0.964643	0.170059	Yes	Segmental	185.508	0.542759	1076	0	150	0.12
Gorai.011G272100.1	Gorai.011G272400.1	SBT4	0.240087	1.51051	0.158944	Yes	Segmental	290.483	0.649911	942	0	150	0.12
Gorai.011G272200.1	Gorai.011G272500.1	SBT4	0.254584	1.40855	0.180743	Yes	Segmental	270.874	0.635335	961	0	150	0.12
Gorai.004G205600.1	Gorai.004G205700.1	SBT1	0.239983	1.67619	0.143172	Yes	Tandem	322.343	0.669749
Gorai.008G115400.1	Gorai.008G115500.1	SBT1	0.112653	0.401489	0.280589	Yes	Tandem	77.2094	0.310888
Gorai.008G115500.1	Gorai.008G115600.1	SBT1	0.318171	1.57126	0.202494	Yes	Tandem	302.165	0.657698
Gorai.009G213400.1	Gorai.009G213500.1	SBT1	0.488565	NaN	NaN	Yes	Tandem	NaN	0.833481
Gorai.009G213500.1	Gorai.009G213600.1	SBT1	0.502935	NaN	NaN	Yes	Tandem	NaN	0.791021
Gorai.010G183400.6	Gorai.010G183500.1	SBT2	0.932552	NaN	NaN	Yes	Tandem	NaN	0.766741
Gorai.008G260500.1	Gorai.008G260600.1	SBT3	1.08099	3.11503	0.347024	Yes	Tandem	599.045	0.738217
Gorai.010G200100.1	Gorai.010G200200.1	SBT4	0.190514	0.73289	0.259949	Yes	Tandem	140.94	0.467724
Gorai.010G200200.1	Gorai.010G200300.1	SBT4	0.204758	0.785147	0.26079	Yes	Tandem	150.99	0.486722
Gorai.011G157100.1	Gorai.011G157200.1	SBT4	0.500502	0.32934	1.51971	No	Tandem	63.3346	0.266547
Gorai.011G272000.1	Gorai.011G272100.1	SBT4	0.060621	0.252291	0.240282	Yes	Tandem	48.5175	0.214241
Gorai.011G272100.1	Gorai.011G272200.1	SBT4	0.0597926	0.378713	0.157884	Yes	Tandem	72.8294	0.297348
Gorai.011G272200.1	Gorai.011G272300.1	SBT4	0.153874	0.967509	0.159042	Yes	Tandem	186.059	0.543549
Gorai.011G272400.1	Gorai.011G272500.1	SBT4	0.229592	1.4778	0.155361	Yes	Tandem	284.192	0.645449
Note: NaN is high sequence divergence Value (pS>=0.75)

## Sheet: G.barbadense
Duplicated gene 1	Duplicated gene 2	Subfamily	Ka	Ks	Ka/Ks	Purifying selection	Duplicate type	Age(MYA)	pS	blastp score	blastp e-value	block score	block e-value
GB_A01G2355	GB_A09G1672	SBT4	0.215879	0.936895	0.23042	Yes	Segmental	180.172	0.534948	234	4e-73	900	6.3e-51
GB_A01G2355	GB_D09G1535	SBT4	0.195442	0.939572	0.208011	Yes	Segmental	180.687	0.535714	237	3e-74	2550	2.4e-194
GB_A02G0887	GB_A05G2122	SBT1	0.120071	0.488569	0.245762	Yes	Segmental	93.9555	0.359023	1216	0	1200	8e-77
GB_A02G1070	GB_A12G2710	SBT3	0.405877	1.88212	0.215649	Yes	Segmental	361.946	0.689018	776	0	450	1.3e-18
GB_A02G0887	GB_D02G0954	SBT1	0.0128696	0.0356892	0.360602	Yes	Segmental	6.8633	0.0348533	1526	0	37050	0
GB_A02G1070	GB_D03G1016	SBT3	0.0138759	0.043083	0.322074	Yes	Segmental	8.28519	0.0418689	1527	0	4650	0
GB_A02G1070	GB_D12G2713	SBT3	0.402524	1.85079	0.217487	Yes	Segmental	355.922	0.686417	808	0	400	2.2e-15
GB_A03G0086	GB_D03G1906	SBT2	0.0143963	0.0805693	0.178683	Yes	Segmental	15.4941	0.0763926	438	2e-150	31150	0
GB_A03G0306	GB_D03G1690	SBT3	0.0129363	0.035354	0.365908	Yes	Segmental	6.79884	0.0345336	1557	0	31150	0
GB_A03G0086	GB_D03G1907	SBT2	0.0219198	0.0455498	0.481226	Yes	Segmental	8.75958	0.0441942	1576	0	400	4.1e-14
GB_A04G0033	GB_D05G4059	SBT5	0.0470034	0.116795	0.402442	Yes	Segmental	22.4606	0.108155	2144	0	1450	1e-102
GB_A05G2075	GB_A05G2668	SBT1	0.212253	0.752548	0.282045	Yes	Segmental	144.721	0.475026	558	0	450	3e-19
GB_A05G1868	GB_A06G0018	SBT5	0.107742	0.367831	0.292913	Yes	Segmental	70.7367	0.290733	311	5e-102	10750	0
GB_A05G2076	GB_A06G0202	SBT1	0.342965	1.16284	0.294937	Yes	Segmental	223.623	0.590886	264	2e-83	10750	0
GB_A05G2668	GB_A06G0202	SBT1	0.154438	0.852864	0.181082	Yes	Segmental	164.012	0.509452	1184	0	550	1.8e-24
GB_A05G2075	GB_A06G0202	SBT1	0.209202	0.977936	0.213921	Yes	Segmental	188.065	0.5464	589	0	250	4e-06
GB_A05G0240	GB_A08G2859	SBT6	0.0684459	0.461777	0.148223	Yes	Segmental	88.8032	0.344804	1845	0	2800	1.6e-213
GB_A05G1136	GB_A08G0217	SBT2	0.528302	2.33175	0.226569	Yes	Segmental	448.413	0.716516	687	0	200	0.00057
GB_A05G1136	GB_A10G0055	SBT2	0.0968354	0.547344	0.176919	Yes	Segmental	105.258	0.388493	1396	0	550	6.4e-23
GB_A05G1423	GB_A10G0567	SBT1	0.0914885	0.567037	0.161345	Yes	Segmental	109.046	0.397862	1280	0	4400	0
GB_A05G1438	GB_A10G0518	SBT1	0.0663883	0.782374	0.0848549	Yes	Segmental	150.457	0.485747	1373	0	4400	0
GB_A05G2122	GB_A11G2360	SBT1	0.232256	NaN	NaN	No	Segmental		0.780293	1065	0	300	9.8e-09
GB_A05G2122	GB_D02G0954	SBT1	0.118398	0.467986	0.252996	Yes	Segmental	89.9973	0.348145	1223	0	2100	8.2e-154
GB_A05G4461	GB_D04G0002	SBT3	0	0	NaN	No	Segmental	0	0	1663	0	27900	0
GB_A05G0240	GB_D05G0246	SBT6	0.0101761	0.0478474	0.212679	Yes	Segmental	9.20142	0.0463531	2095	0	142750	0
GB_A05G0937	GB_D05G0918	SBT4	0.017019	0.071583	0.237752	Yes	Segmental	13.766	0.0682731	1146	0	142750	0
GB_A05G1136	GB_D05G1121	SBT2	0.00523631	0.0345693	0.151473	Yes	Segmental	6.64794	0.0337847	1719	0	142750	0
GB_A05G1423	GB_D05G1433	SBT1	0.0106196	0.0447029	0.237561	Yes	Segmental	8.59671	0.0433967	811	0	142750	0
GB_A05G1438	GB_D05G1447	SBT1	0.00579265	0.0351147	0.164964	Yes	Segmental	6.75282	0.0343053	1563	0	142750	0
GB_A05G1868	GB_D05G1893	SBT5	0.0217367	0.0286602	0.758428	Yes	Segmental	5.51158	0.0281195	395	3e-134	142750	0
GB_A05G2077	GB_D05G2101	SBT1	0.0061362	0.0375922	0.163231	Yes	Segmental	7.22927	0.0366656	1528	0	142750	0
GB_A05G2668	GB_D05G2668	SBT1	0.0109507	0.0361573	0.302862	Yes	Segmental	6.95333	0.0352996	1532	0	142750	0
GB_A05G2077	GB_D05G2668	SBT1	0.539295	3.50111	0.154035	Yes	Segmental	673.29	0.742958	593	0	550	7.4e-25
GB_A05G2668	GB_D05G2100	SBT1	0.39031	NaN	NaN	No	Segmental		0.781196	765	0	500	7.8e-23
GB_A05G1868	GB_D06G0016	SBT5	0.11029	0.380997	0.289477	Yes	Segmental	73.2687	0.298725	309	4e-101	10400	0
GB_A05G2668	GB_D06G0199	SBT1	0.154414	0.836385	0.18462	Yes	Segmental	160.843	0.504108	1181	0	450	1.6e-17
GB_A05G2076	GB_D06G0199	SBT1	0.329445	1.15335	0.285641	Yes	Segmental	221.799	0.588861	265	8e-84	200	0.00051
GB_A05G0240	GB_D08G2849	SBT6	0.0707288	0.455629	0.155233	Yes	Segmental	87.621	0.341469	1847	0	1800	4.3e-119
GB_A05G1136	GB_D08G0224	SBT2	0.525233	2.25387	0.233036	Yes	Segmental	433.437	0.712852	689	0	200	0.0005
GB_A05G1136	GB_D10G0055	SBT2	0.0984056	0.559938	0.175744	Yes	Segmental	107.68	0.394513	1397	0	550	9.2e-23
GB_A05G1423	GB_D10G0588	SBT1	0.0913899	0.562224	0.162551	Yes	Segmental	108.12	0.395595	1290	0	5650	0
GB_A05G1438	GB_D10G0531	SBT1	0.0607394	0.753244	0.0806371	Yes	Segmental	144.855	0.475281	1385	0	5650	0
GB_A05G2122	GB_D11G2177	SBT1	0.236154	NaN	NaN	No	Segmental		0.771399	1063	0	300	1.1e-09
GB_A05G2668	GB_D11G2099	SBT1	0.36682	2.40024	0.152827	Yes	Segmental	461.584	0.719438	825	0	150	0.028
GB_A06G1527	GB_A10G0336	SBT5	0.262494	0.869165	0.302007	Yes	Segmental	167.147	0.514623	962	0	200	0.00064
GB_A06G1946	GB_A10G2664	SBT4	0.354556	1.71903	0.206253	Yes	Segmental	330.584	0.674205	656	0	250	9.6e-07
GB_A06G0018	GB_D05G1893	SBT5	0.129828	0.5247	0.247432	Yes	Segmental	100.904	0.377412	1169	0	10550	0
GB_A06G0196	GB_D05G2099	SBT1	0.301427	1.05739	0.285066	Yes	Segmental	203.345	0.566867	408	5e-137	10550	0
GB_A06G0202	GB_D05G2100	SBT1	0.418865	NaN	NaN	No	Segmental		0.791517	770	0	10550	0
GB_A06G0202	GB_D05G2668	SBT1	0.160208	0.851652	0.188115	Yes	Segmental	163.779	0.509063	1173	0	1200	2.1e-70
GB_A06G0202	GB_D05G2099	SBT1	0.192441	0.813761	0.236483	Yes	Segmental	156.493	0.496577	428	2e-144	350	3.4e-12
GB_A06G0018	GB_D06G0016	SBT5	0.00692746	0.0400763	0.172857	Yes	Segmental	7.70698	0.0390244	1549	0	44750	0
GB_A06G0196	GB_D06G0196	SBT1	0.0150168	0.0678305	0.221388	Yes	Segmental	13.0443	0.0648536	1353	0	44750	0
GB_A06G0202	GB_D06G0199	SBT1	0.0097623	0.038037	0.256653	Yes	Segmental	7.31481	0.0370885	1539	0	44750	0
GB_A06G1798	GB_D06G1858	SBT2	0.0111445	0.0423818	0.262956	Yes	Segmental	8.15035	0.0412066	1640	0	32800	0
GB_A06G1945	GB_D06G2012	SBT4	0.206001	0.637603	0.323087	Yes	Segmental	122.616	0.429483	223	3e-69	32800	0
GB_A06G1946	GB_D06G2013	SBT4	0.0498713	0.0946335	0.526994	Yes	Segmental	18.1987	0.0889065	1070	0	32800	0
GB_A06G1946	GB_D06G2011	SBT4	0.237273	0.902384	0.26294	Yes	Segmental	173.535	0.524821	713	0	1200	1.8e-75
GB_A06G0202	GB_D06G0196	SBT1	0.076108	0.287264	0.26494	Yes	Segmental	55.2432	0.23865	1201	0	900	1.4e-52
GB_A06G1945	GB_D06G2011	SBT4	0.0316782	0.0746812	0.42418	Yes	Segmental	14.3618	0.0710834	1367	0	550	1.5e-22
GB_A06G1945	GB_D06G2013	SBT4	0.0523231	0.0966985	0.541096	Yes	Segmental	18.5959	0.0907242	1346	0	150	0.11
GB_A06G1527	GB_D06G1641	SBT5	0.0120031	0.0395953	0.303145	Yes	Segmental	7.61449	0.0385683	1541	0	350	3.9e-13
GB_A06G1527	GB_D10G0341	SBT5	0.263805	0.859313	0.306995	Yes	Segmental	165.253	0.511511	945	0	200	0.00085
GB_A06G1945	GB_D10G2624	SBT4	0.319733	1.93909	0.164888	Yes	Segmental	372.902	0.693479	851	0	300	1e-09
GB_A07G2292	GB_A11G1543	SBT5	0.105496	0.522968	0.201726	Yes	Segmental	100.571	0.376551	1307	0	2150	1.5e-164
GB_A07G1683	GB_D07G1692	SBT1	0.00810506	0.0310831	0.260755	Yes	Segmental	5.97751	0.0304478	1548	0	75550	0
GB_A07G2292	GB_D07G2252	SBT5	0.00835583	0.0525076	0.159136	Yes	Segmental	10.0976	0.0507117	1565	0	21250	0
GB_A07G2292	GB_D11G1580	SBT5	0.101804	0.498098	0.204386	Yes	Segmental	95.788	0.363959	1320	0	2200	1.7e-165
GB_A08G1631	GB_A11G0882	SBT4	0.123916	0.664242	0.186552	Yes	Segmental	127.739	0.440667	1222	0	1150	2.8e-70
GB_A08G1207	GB_A11G0103	SBT6	0.0707057	0.306687	0.230547	Yes	Segmental	58.9782	0.251722	2246	0	400	2.4e-15
GB_A08G2910	GB_A13G2332	SBT1	0.0911913	0.821652	0.110985	Yes	Segmental	158.01	0.49923	1228	0	850	5.1e-42
GB_A08G2859	GB_D05G0246	SBT6	0.0696437	0.440496	0.158103	Yes	Segmental	84.7108	0.333142	1820	0	2600	2.3e-194
GB_A08G1631	GB_D08G1630	SBT4	0.00535186	0.0473942	0.112922	Yes	Segmental	9.11426	0.0459277	1521	0	64350	0
GB_A08G2143	GB_D08G2128	SBT4	0.0213465	0.0356123	0.599413	Yes	Segmental	6.84852	0.03478	1508	0	64350	0
GB_A08G2859	GB_D08G2849	SBT6	0.00682211	0.033572	0.203208	Yes	Segmental	6.45616	0.0328317	2095	0	64350	0
GB_A08G2910	GB_D08G2900	SBT1	0.0185359	0.102348	0.181106	Yes	Segmental	19.6824	0.095672	1408	0	64350	0
GB_A08G0013	GB_D08G0014	SBT4	0.112148	0.183211	0.612123	Yes	Segmental	35.2329	0.16255	1372	0	36700	0
GB_A08G0217	GB_D08G0224	SBT2	0.004339	0.0303625	0.142906	Yes	Segmental	5.83895	0.0297562	1662	0	36700	0
GB_A08G0299	GB_D08G0307	SBT5	0.0270151	0.0703212	0.384168	Yes	Segmental	13.5233	0.0671251	1407	0	36700	0
GB_A08G0013	GB_D08G0020	SBT4	0.153898	0.225101	0.683684	Yes	Segmental	43.2886	0.194461	1377	0	1450	4e-99
GB_A08G1207	GB_D08G1208	SBT6	0.00977637	0.0233896	0.41798	Yes	Segmental	4.49799	0.0230286	2697	0	1200	1.8e-88
GB_A08G1631	GB_D11G0910	SBT4	0.119764	0.640473	0.186993	Yes	Segmental	123.168	0.430707	1233	0	1200	1.6e-73
GB_A08G1207	GB_D11G0101	SBT6	0.0704823	0.311477	0.226284	Yes	Segmental	59.8994	0.254895	2251	0	400	1.7e-15
GB_A08G2910	GB_D13G2282	SBT1	0.0882011	0.821195	0.107406	Yes	Segmental	157.922	0.499077	1230	0	950	1.2e-52
GB_A09G0673	GB_D09G0559	SBT1	0.00683214	0.0396548	0.17229	Yes	Segmental	7.62593	0.0386247	1584	0	37700	0
GB_A09G1241	GB_D09G1085	SBT5	0.0231648	0.0516217	0.448741	Yes	Segmental	9.92725	0.0498852	1466	0	37700	0
GB_A09G1672	GB_D09G1535	SBT4	0.0112991	0.060334	0.187276	Yes	Segmental	11.6027	0.057971	1497	0	2900	1.6e-221
GB_A10G0055	GB_D05G1121	SBT2	0.0967392	0.54625	0.177097	Yes	Segmental	105.048	0.387965	1399	0	500	1.4e-20
GB_A10G0518	GB_D05G1447	SBT1	0.0682701	0.759236	0.0899195	Yes	Segmental	146.007	0.477467	1299	0	4700	0
GB_A10G0567	GB_D05G1433	SBT1	0.0970709	0.528097	0.183813	Yes	Segmental	101.557	0.379096	658	0	4700	0
GB_A10G0336	GB_D06G1641	SBT5	0.265806	0.848459	0.313281	Yes	Segmental	163.165	0.508035	959	0	750	8.2e-36
GB_A10G2664	GB_D06G2011	SBT4	0.30145	2.01983	0.149246	Yes	Segmental	388.428	0.699247	876	0	300	6.9e-09
GB_A10G2664	GB_D10G2623	SBT4	0.0184935	0.0585971	0.315604	Yes	Segmental	11.2687	0.0563665	1437	0	35900	0
GB_A10G2665	GB_D10G2624	SBT4	0.0150194	0.0661672	0.226992	Yes	Segmental	12.7245	0.0633324	4126	0	35900	0
GB_A10G0055	GB_D10G0055	SBT2	0.0123151	0.0549445	0.224137	Yes	Segmental	10.5662	0.0529801	1649	0	30850	0
GB_A10G0336	GB_D10G0341	SBT5	0.00976558	0.0419435	0.232827	Yes	Segmental	8.06605	0.0407922	1555	0	30850	0
GB_A10G0518	GB_D10G0531	SBT1	0.0122398	0.0548351	0.223211	Yes	Segmental	10.5452	0.0528785	1547	0	30850	0
GB_A10G0567	GB_D10G0588	SBT1	0.0133446	0.0338487	0.394244	Yes	Segmental	6.50937	0.0330962	1526	0	30850	0
GB_A10G2665	GB_D10G2623	SBT4	0.166524	1.00593	0.165543	Yes	Segmental	193.448	0.553859	1068	0	4050	0
GB_A10G2664	GB_D10G2624	SBT4	0.13066	0.64076	0.203914	Yes	Segmental	123.223	0.430829	4281	0	1850	6.4e-134
GB_A11G0241	GB_A12G2644	SBT2	0.0524648	0.241029	0.21767	Yes	Segmental	46.3517	0.206135	177	1e-59	850	6.1e-46
GB_A11G1543	GB_D07G2252	SBT5	0.101157	0.534978	0.189087	Yes	Segmental	102.88	0.382483	1294	0	3400	2.7e-279
GB_A11G0882	GB_D08G1630	SBT4	0.124502	0.664999	0.187222	Yes	Segmental	127.884	0.440979	1231	0	1350	5e-86
GB_A11G0103	GB_D08G1208	SBT6	0.0675729	0.307441	0.219791	Yes	Segmental	59.1233	0.252223	2376	0	500	3.3e-21
GB_A11G0103	GB_D11G0101	SBT6	0.00568343	0.0319373	0.177956	Yes	Segmental	6.14179	0.0312668	2678	0	91150	0
GB_A11G0241	GB_D11G0236	SBT2	0.0046154	0.0456994	0.100995	Yes	Segmental	8.78835	0.044335	193	7e-66	91150	0
GB_A11G0882	GB_D11G0910	SBT4	0.00943455	0.0284439	0.33169	Yes	Segmental	5.46998	0.0279113	1516	0	91150	0
GB_A11G1543	GB_D11G1580	SBT5	0.0127275	0.038	0.334934	Yes	Segmental	7.30769	0.0370534	1542	0	91150	0
GB_A11G2044	GB_D11G2099	SBT1	0.0181124	0.0309422	0.585362	Yes	Segmental	5.95042	0.0303126	753	0	91150	0
GB_A11G2360	GB_D11G2177	SBT1	0.00874391	0.040538	0.215697	Yes	Segmental	7.79576	0.0394619	1550	0	8850	0
GB_A11G0241	GB_D12G2649	SBT2	0.0524856	0.304099	0.172594	Yes	Segmental	58.4805	0.25	176	5e-59	950	1.8e-52
GB_A12G2710	GB_D03G1016	SBT3	0.404924	1.86713	0.21687	Yes	Segmental	359.064	0.687787	776	0	400	2.6e-14
GB_A12G2644	GB_D11G0236	SBT2	0.0574214	0.261614	0.219489	Yes	Segmental	50.3103	0.220859	175	1e-58	750	2.8e-38
GB_A12G1252	GB_D12G1236	SBT1	0.0131689	0.0438815	0.300101	Yes	Segmental	8.43875	0.0426225	1547	0	82700	0
GB_A12G1253	GB_D12G1237	SBT1	0.0143557	0.063002	0.227861	Yes	Segmental	12.1158	0.0604284	886	0	82700	0
GB_A12G1254	GB_D12G1238	SBT1	0.0250545	0.122722	0.204157	Yes	Segmental	23.6004	0.113208	626	0	82700	0
GB_A12G2644	GB_D12G2649	SBT2	0.00928445	0.0610248	0.152142	Yes	Segmental	11.7355	0.0586081	193	8e-66	82700	0
GB_A12G2710	GB_D12G2713	SBT3	0.0185656	0.0276086	0.672455	Yes	Segmental	5.30935	0.0271067	1481	0	82700	0
GB_A12G0218	GB_D12G0234	SBT1	0.0221318	0.0506991	0.436532	Yes	Segmental	9.74984	0.0490235	1100	0	12100	0
GB_A12G0219	GB_D12G0235	SBT1	0.104724	0.32614	0.3211	Yes	Segmental	62.7192	0.26448	285	1e-92	12100	0
GB_A12G1252	GB_D12G1237	SBT1	0.112009	0.512607	0.218509	Yes	Segmental	98.5782	0.371355	756	0	1050	2.4e-67
GB_A12G1253	GB_D12G1238	SBT1	0.32035	1.47085	0.2178	Yes	Segmental	282.855	0.644475	847	0	1050	2.4e-67
GB_A12G1254	GB_D12G1236	SBT1	0.291394	1.48104	0.19675	Yes	Segmental	284.815	0.645899	404	1e-135	400	7.2e-14
GB_A12G0219	GB_D12G0234	SBT1	0.0795431	0.188435	0.422126	Yes	Segmental	36.2374	0.166627	791	0	300	3.1e-11
GB_A12G0218	GB_D12G0235	SBT1	0.0119406	0.0385937	0.309391	Yes	Segmental	7.42187	0.0376176	450	2e-155	200	0.0022
GB_A13G2332	GB_D08G2900	SBT1	0.089368	0.766532	0.116587	Yes	Segmental	147.41	0.480106	1297	0	900	1.8e-49
GB_A13G1546	GB_D13G1464	SBT3	0.00705473	0.0442117	0.159567	Yes	Segmental	8.50225	0.0429338	247	3e-86	60100	0
GB_A13G2332	GB_D13G2282	SBT1	0.00940635	0.0472025	0.199277	Yes	Segmental	9.07741	0.0457478	1538	0	60100	0
GB_A13G0305	GB_D13G0300	SBT3	0.0194797	0.0379594	0.513172	Yes	Segmental	7.29988	0.0370147	1473	0	20050	0
GB_A13G0015	GB_D13G0051	SBT5	0.0316973	0.0496902	0.637899	Yes	Segmental	9.55582	0.0480799	1343	0	2200	2.7e-152
GB_D03G1016	GB_D12G2713	SBT3	0.403073	1.84836	0.21807	Yes	Segmental	355.454	0.68621	817	0	300	3e-09
GB_D05G2101	GB_D05G2668	SBT1	0.546305	2.88889	0.189105	Yes	Segmental	555.556	0.73407	587	0	2050	1.8e-141
GB_D05G2100	GB_D05G2668	SBT1	0.395258	NaN	NaN	No	Segmental		0.78123	775	0	150	0.091
GB_D05G1893	GB_D06G0016	SBT5	0.12777	0.531846	0.240239	Yes	Segmental	102.278	0.380945	1174	0	10250	0
GB_D05G2668	GB_D06G0199	SBT1	0.160183	0.835202	0.191789	Yes	Segmental	160.616	0.50372	1171	0	1200	1.5e-70
GB_D05G2100	GB_D06G0199	SBT1	0.408352	NaN	NaN	No	Segmental		0.778125	775	0	250	6.4e-06
GB_D05G0246	GB_D08G2849	SBT6	0.0719328	0.434451	0.165572	Yes	Segmental	83.5483	0.329769	1827	0	1950	3.4e-133
GB_D05G1121	GB_D08G0224	SBT2	0.5292	1.99545	0.265203	Yes	Segmental	383.741	0.697571	684	0	250	1.3e-07
GB_D05G1121	GB_D10G0055	SBT2	0.0983077	0.558861	0.175907	Yes	Segmental	107.473	0.394002	1400	0	500	5.3e-20
GB_D05G1433	GB_D10G0588	SBT1	0.0944927	0.503624	0.187626	Yes	Segmental	96.8508	0.366793	670	0	5700	0
GB_D05G1447	GB_D10G0531	SBT1	0.0638651	0.730968	0.0873707	Yes	Segmental	140.571	0.466999	1377	0	5700	0
GB_D06G1641	GB_D10G0341	SBT5	0.267528	0.84162	0.317873	Yes	Segmental	161.85	0.505818	951	0	800	2.1e-39
GB_D06G2011	GB_D10G2624	SBT4	0.299881	2.17464	0.137899	Yes	Segmental	418.201	0.708713	871	0	300	3.2e-10
GB_D06G2013	GB_D10G2623	SBT4	0.336808	1.78535	0.188651	Yes	Segmental	343.337	0.680619	877	0	300	3.2e-10
GB_D07G2252	GB_D11G1580	SBT5	0.0974877	0.509772	0.191238	Yes	Segmental	98.0331	0.369922	1330	0	3400	9.1e-276
GB_D08G1630	GB_D11G0910	SBT4	0.120348	0.645611	0.186409	Yes	Segmental	124.156	0.432887	1233	0	1350	4.1e-86
GB_D08G1208	GB_D11G0101	SBT6	0.0671773	0.314527	0.213582	Yes	Segmental	60.4859	0.256904	2370	0	500	1.8e-20
GB_D08G2900	GB_D13G2282	SBT1	0.0865326	0.786012	0.110091	Yes	Segmental	151.156	0.487025	1313	0	1100	2.6e-65
GB_D11G0236	GB_D12G2649	SBT2	0.0574443	0.282358	0.203445	Yes	Segmental	54.2996	0.235294	174	5e-58	900	2.2e-49
GB_A05G2075	GB_A05G2076	SBT1	0.0709433	0.126147	0.562386	Yes	Tandem	24.259	0.116109
GB_A12G0218	GB_A12G0219	SBT1	0.0688194	0.211678	0.325113	Yes	Tandem	40.7074	0.184429
GB_A12G1252	GB_A12G1253	SBT1	0.115511	0.41756	0.276634	Yes	Tandem	80.3	0.320197
GB_A12G1253	GB_A12G1254	SBT1	0.327823	1.73932	0.188478	Yes	Tandem	334.485	0.676228
GB_D08G2114	GB_D08G2115	SBT1	0.29734	1.80581	0.164657	Yes	Tandem	347.271	0.682487
GB_D12G0234	GB_D12G0235	SBT1	0.0159793	0.0126053	1.26766	No	Tandem	2.4241	0.0125
GB_D12G1236	GB_D12G1237	SBT1	0.118364	0.485738	0.243678	Yes	Tandem	93.4112	0.357545
GB_D12G1237	GB_D12G1238	SBT1	0.312934	1.42714	0.219274	Yes	Tandem	274.449	0.638142
GB_D03G1906	GB_D03G1907	SBT2	0.0220642	0.0898774	0.245492	Yes	Tandem	17.2841	0.0847009
GB_A06G1945	GB_A06G1946	SBT4	0.243129	0.884611	0.274842	Yes	Tandem	170.118	0.519421
GB_A10G2664	GB_A10G2665	SBT4	0.226205	1.24364	0.181889	Yes	Tandem	239.161	0.607137
GB_D06G2011	GB_D06G2012	SBT4	0.19822	0.723478	0.273982	Yes	Tandem	139.13	0.464159
GB_D06G2012	GB_D06G2013	SBT4	0.0147715	0.00836829	1.76518	No	Tandem	1.60929	0.00832178
GB_D10G2623	GB_D10G2624	SBT4	0.0699995	0.263008	0.266149	Yes	Tandem	50.5785	0.221842
Note: NaN is high sequence divergence Value (pS>=0.75)
