# Supplementary material for: Genome-Wide Investigation and Co-Expression Network Analysis of SBT Family Gene in Gossypium
Source: Int J Mol Sci. 2023 Mar 17;24(6):5760. doi: 10.3390/ijms24065760 (PMC10056545; doi:10.3390/ijms24065760)
Supplement: Supplementary file 1 [file ijms-24-05760-s001.zip › TableS3.xlsx]

## Sheet: Sheet1
ID	Root_CK	Root_PEG	Root_NaCl	Leaf_CK	Leaf_PEG	Leaf_NaCl	Stem_CK	Stem_PEG	Stem_NaCl		Leaf_PEG/CK	Leaf_NaCl/CK	Stem_PEG/CK	Stem_NaCl/CK	Root_PEG/CK	Root_NaCl/CK
Cotton_A_00534	0	0	0	0	0	0	0	0	0		Na	Na	Na	Na	Na	Na
Cotton_A_02434	40.3538	27.2246	33.0675	16.4086	12.9906	14.2322	20.3036	19.7437	16.9617		-0.336984	-0.205293	-0.0403432	-0.259455	-0.567794	-0.287291
Cotton_A_02647	18.3567	13.7588	10.3199	48.6329	92.6437	98.1678	29.5212	34.7243	41.2748		0.92976	1.01332	0.234194	0.48351	-0.415952	-0.830878
Cotton_A_03171	106.215	21.4336	37.5622	46.5286	15.0866	20.8277	164.592	113.646	64.0931		-1.62485	-1.15961	-0.534347	-1.36065	-2.30904	-1.49963
Cotton_A_03375	57.6363	9.12152	33.1001	41.2614	13.7844	62.939	109.532	48.1816	75.7358		-1.58176	0.609161	-1.1848	-0.532305	-2.65963	-0.800142
Cotton_A_03376	9.86704	1.30558	7.45151	3.94948	5.53556	9.75356	4.00287	5.91496	3.04083		0.487067	1.30427	0.563334	-0.39657	-2.91793	-0.405085
Cotton_A_03377	64.8027	31.8935	31.2778	3.87062	3.43386	4.99432	66.2579	43.8203	17.404		-0.172733	0.367724	-0.596493	-1.92867	-1.02279	-1.05091
Cotton_A_03725	0.0751297	0	0.0623557	22.303	9.30281	24.9258	0.550395	0.835053	0.0894362		-1.2615	0.160402	0.6014	-2.62154	1.67558	-0.268862
Cotton_A_03979	0	0	0	0	0	0	0.0516543	0	0		Na	Na	2.21607	2.21607	Na	Na
Cotton_A_04139	0.969787	1.52908	1.57879	1.07653	1.37413	1.25543	2.63315	2.79835	3.64105		0.35213	0.221793	0.0877867	0.467565	0.656924	0.703079
Cotton_A_04621	0	0	0	0	0	0	0	0	0		Na	Na	Na	Na	Na	Na
Cotton_A_06799	0	0	0	0	0	0	0	0	0		Na	Na	Na	Na	Na	Na
Cotton_A_07447	4.88761	3.23347	3.8806	3.39294	1.68425	3.23738	12.4059	13.0961	8.81665		-1.01043	-0.0677092	0.0781108	-0.492724	-0.596046	-0.332849
Cotton_A_08556	17.6303	7.19015	8.21518	8.39337	4.35757	6.28601	75.7233	55.2507	31.3928		-0.945726	-0.417106	-0.454745	-1.2703	-1.29396	-1.10169
Cotton_A_08666	0.431258	0.305181	0.694849	0	0	0	0.101371	0.0352462	0.13589		Na	Na	-1.52411	0.422794	-0.498886	0.688148
Cotton_A_08667	0	0	0.256007	0	0	0	0	0	0		Na	Na	Na	Na	Na	0.0931489
Cotton_A_09950	0	0	0.588092	0	0	0	0	0	0		Na	Na	Na	Na	Na	1.29301
Cotton_A_09951	0.0511045	0.204925	1.52709	0	0.235326	0.0921444	0.102108	0.0710052	0.0912488		-0.0283737	-1.38107	-0.524099	-0.162218	2.00357	4.90119
Cotton_A_09963	0	0	0	0.152713	0	0.534271	0.345333	0	0.0440925		0.652212	1.80675	-0.524954	-2.96938	Na	Na
Cotton_A_10230	4.99637	1.22894	4.57605	0.728859	0.723619	1.27493	4.5202	5.4348	4.08276		-0.0104095	0.806706	0.26584	-0.146842	-2.02347	-0.126778
Cotton_A_10766	0	0.0670479	0.655672	0	0	0	0	0	0		Na	Na	Na	Na	-1.83977	1.44994
Cotton_A_10767	0	0	0.0873057	0	0	0	0	0	0		Na	Na	Na	Na	Na	-1.45889
Cotton_A_10921	0	0	0	0	0	0	0	0	0		Na	Na	Na	Na	Na	Na
Cotton_A_10948	0.592865	0.206719	0.224665	3.26791	4.74779	3.90404	3.09017	2.54288	1.84097		0.538888	0.2566	-0.281223	-0.74722	-1.52003	-1.39993
Cotton_A_11161	6.25711	4.36893	9.76396	4.19882	4.03848	1.98902	5.97447	6.59882	5.11519		-0.0561715	-1.07793	0.143397	-0.224023	-0.518216	0.64197
Cotton_A_11860	31.293	7.43025	9.00025	1.22789	3.49451	2.10028	9.04568	5.15021	4.01766		1.50891	0.7744	-0.812598	-1.17087	-2.07436	-1.7978
Cotton_A_12899	0.0259669	0.104119	0.129331	0	0	0	0	0	0.0927254		Na	Na	Na	-1.372	2.00349	2.31632
Cotton_A_13191	19.1406	14.8955	23.6123	1.3017	0.380096	0.446477	1.28628	0.756832	4.86378		-1.77596	-1.54374	-0.76516	1.91887	-0.36176	0.302903
Cotton_A_13261	0	0	0	0	0	0	0	0	0		Na	Na	Na	Na	Na	Na
Cotton_A_13434	0	0	0	0	0	0	0	0	0		Na	Na	Na	Na	Na	Na
Cotton_A_13488	0	0	0	0	0	0	0	0	0		Na	Na	Na	Na	Na	Na
Cotton_A_13489	0	0	0	0	0	0	0	0	0		Na	Na	Na	Na	Na	Na
Cotton_A_13490	0	0	0	0	0	0	0	0	0		Na	Na	Na	Na	Na	Na
Cotton_A_13491	0	0	0	0	0	0	0	0	0		Na	Na	Na	Na	Na	Na
Cotton_A_13493	0	0	0	0	0	0	0	0	0		Na	Na	Na	Na	Na	Na
Cotton_A_13494	0	0	0	0	0	0	0	0	0		Na	Na	Na	Na	Na	Na
Cotton_A_13495	0	0	0	0	0	0	0	0	0		Na	Na	Na	Na	Na	Na
Cotton_A_13496	0	0	0	0	0	0	0	0	0		Na	Na	Na	Na	Na	Na
Cotton_A_13497	0	0	0	0	0	0	0	0	0		Na	Na	Na	Na	Na	Na
Cotton_A_13498	20.6097	4.94277	0.692858	0	0	0	0	0	0		Na	Na	Na	Na	-2.05993	-4.89462
Cotton_A_13499	0	0	0	0	0	0	0	0	0		Na	Na	Na	Na	Na	Na
Cotton_A_13500	0	0	0	0	0	0	0	0	0		Na	Na	Na	Na	Na	Na
Cotton_A_14510	7.09613	7.74715	10.0879	3.70576	4.62708	2.68409	4.2414	4.76275	4.60529		0.320333	-0.465336	0.167254	0.118751	0.126633	0.507522
Cotton_A_14888	76.0051	189.323	117.724	318.759	55.5595	170.141	50.4823	60.8671	36.2093		-2.52036	-0.905735	0.269885	-0.479417	1.31668	0.63124
Cotton_A_14893	15.8318	9.48241	49.1222	0.409295	0.325071	0.286402	5.07827	3.89944	6.09739		-0.332386	-0.515099	-0.38107	0.263855	-0.7395	1.63355
Cotton_A_15053	12.6972	4.9674	5.77118	8.00723	5.66853	5.68354	14.5272	12.1958	8.04215		-0.498329	-0.494513	-0.252372	-0.853104	-1.35395	-1.13757
Cotton_A_16037	0	0	0	0.317428	0	0.832924	0	0	0		-0.403395	1.39176	Na	Na	Na	Na
Cotton_A_16445	1.99024	3.32565	1.23885	4.15427	3.13144	6.19038	11.2832	4.45874	3.19852		-0.407769	0.575433	-1.33947	-1.8187	0.740694	-0.683941
Cotton_A_16655	3.00581	2.90367	0.849082	4.21775	1.00806	2.55045	20.4392	9.93164	6.99082		-2.06489	-0.725722	-1.04123	-1.54781	-0.0498763	-1.82378
Cotton_A_18231	490.697	565.518	541.092	0.542086	3.53661	3.3415	234.768	129.781	110.007		2.70577	2.6239	-0.855157	-1.09364	0.20474	0.141041
Cotton_A_18889	69.3243	27.0344	19.5272	4.00984	1.83736	2.69782	37.1182	27.8551	21.819		-1.12591	-0.571751	-0.414185	-0.766542	-1.35856	-1.82788
Cotton_A_18954	55.2814	77.627	96.1951	42.8139	73.8493	71.032	85.6738	126.347	184.622		0.786505	0.73039	0.560465	1.10765	0.489764	0.799169
Cotton_A_19755	2.46601	2.81684	2.8907	2.3693	5.36608	4.23079	9.37532	7.71641	13.5111		1.17941	0.836466	-0.280938	0.527205	0.191899	0.22924
Cotton_A_19912	0	0	0.223351	0.158483	0	0	0	0	0.137271		0.598706	0.598706	Na	-0.806008	Na	-0.103722
Cotton_A_20331	0.700346	0.355153	2.01409	0	0.519018	0	1.92997	3.79115	3.45017		1.11275	Na	0.974057	0.838089	-0.979627	1.52399
Cotton_A_20543	10.2876	4.81919	8.94783	1.06577	2.11614	2.39027	5.4038	6.88959	6.39058		0.989539	1.16528	0.350444	0.241973	-1.09404	-0.201297
Cotton_A_22944	6.4491	1.99995	7.11682	0.757194	1.16934	0.196242	3.31671	3.13851	2.8661		0.62696	-1.94803	-0.0796731	-0.210664	-1.68913	0.142135
Cotton_A_22973	36.9806	134.984	41.7567	0	0	0	0.055227	0	0		Na	Na	2.11959	2.11959	1.86795	0.175239
Cotton_A_22974	1.33614	2.52108	0.78295	61.9709	23.6443	50.1655	42.0346	20.6041	23.2942		-1.3901	-0.304895	-1.02865	-0.851607	0.915971	-0.771079
Cotton_A_23202	0	0	0	0	0	0	0	0	0		Na	Na	Na	Na	Na	Na
Cotton_A_24355	0	0	0	0	0	0	0	0	0		Na	Na	Na	Na	Na	Na
Cotton_A_26114	0	0	0	0	0	0	0	0	0		Na	Na	Na	Na	Na	Na
Cotton_A_26115	0	0	0.0306093	0	0	0	0	0	0		Na	Na	Na	Na	Na	-2.97099
Cotton_A_26116	0	0	0	0	0	0	0	0	0		Na	Na	Na	Na	Na	Na
Cotton_A_26117	0	0	0	0	0	0	0	0	0		Na	Na	Na	Na	Na	Na
Cotton_A_26123	0	0	0.0537635	0	0	0	0	0	0		Na	Na	Na	Na	Na	-2.15834
Cotton_A_26124	0	0	0.529086	0	0	0	0	0	0		Na	Na	Na	Na	Na	1.14047
Cotton_A_26289	0.0273382	0	0.272386	0	0	0	0	0	0		Na	Na	Na	Na	3.13404	3.31666
Cotton_A_26615	58.5434	20.9136	35.6171	211.856	38.9799	122.683	145.267	144.723	81.0479		-2.44228	-0.788149	-0.00541279	-0.84186	-1.48507	-0.716936
Cotton_A_27395	1.15402	0.592907	0.700477	12.8976	7.90031	12.9094	9.04701	8.63678	3.53833		-0.707121	0.00131932	-0.0669475	-1.35437	-0.96079	-0.720259
Cotton_A_28587	0	0	0.532305	0.311089	5.25039	2.72093	0.100501	0.244603	0.0449093		4.07703	3.1287	1.28323	-1.16212	Na	1.14922
Cotton_A_28742	0.58988	0	0	0	0	2.08127	4.81758	21.5546	10.9094		Na	3.11636	2.16162	1.17919	-1.29739	-1.29739
Cotton_A_29458	0.0231646	0.0619481	0.0576596	0.0716409	0	0	0.0462791	0.0321785	0.124116		1.74418	1.74418	-0.524264	1.42326	1.41914	1.31564
Cotton_A_30414	0	0	0	0	0	0	0	0	0		Na	Na	Na	Na	Na	Na
Cotton_A_31274	0	0	0	0	0	0	0	0	0		Na	Na	Na	Na	Na	Na
Cotton_A_31275	0	0	0	0	0	0	0	0	0		Na	Na	Na	Na	Na	Na
Cotton_A_31276	3.71691	4.39111	1.0156	0	1.72856	2.32598	6.79483	6.76873	5.01906		2.84846	3.27673	-0.00555229	-0.43702	0.240482	-1.87177
Cotton_A_31277	0	0	0	0	0	0	0	0	0		Na	Na	Na	Na	Na	Na
Cotton_A_31278	0	0	0	0	0	0	0	0	0		Na	Na	Na	Na	Na	Na
Cotton_A_31279	0	0	0	0	0	0	0	0	0		Na	Na	Na	Na	Na	Na
Cotton_A_33337	1.61122	0.962522	0	2.36441	0	0	1.65913	0	3.97587		-3.30037	-3.30037	-2.78932	1.26084	-0.743262	-2.74705
Cotton_A_35466	10.883	10.9746	14.1374	12.5599	14.9574	19.9149	11.8313	12.3154	11.8526		0.252034	0.665023	0.0578549	0.00259496	0.0120921	0.377441
Cotton_A_35816	320.053	233.364	120.315	357.545	23.7568	207.624	983.105	559.242	301.892		-3.91171	-0.784152	-0.813873	-1.70331	-0.455729	-1.41149
Cotton_A_36345	126.147	59.509	144.174	85.1018	90.0017	111.104	134.082	149.505	97.5149		0.0807626	0.384649	0.157078	-0.459421	-1.08393	0.192705
Cotton_A_37120	0	0	0	0	0	0	0	0	0		Na	Na	Na	Na	Na	Na
Cotton_A_37979	48.9379	16.7895	38.0589	17.6354	11.9975	17.9585	6.30726	8.16988	3.56626		-0.55574	0.0261926	0.373301	-0.822602	-1.54339	-0.362718
Cotton_A_40055	1.30791	1.25347	1.71646	0	0	0	0	0	0		Na	Na	Na	Na	-0.0613358	0.392173
Cotton_A_40069	48.2787	155.725	144.685	308.547	466.242	437.586	355.115	360.136	306.495		0.595589	0.504076	0.0202555	-0.212423	1.68954	1.58346
Cotton_A_40530	8.07426	12.2792	2.45909	63.0704	36.9177	57.1669	38.184	44.4589	27.3373		-0.77265	-0.141783	0.219504	-0.482097	0.604815	-1.71521
Na:The denominator is 0 when you calculate the ratio
