# Supplementary material for: Genome-Wide Investigation and Co-Expression Network Analysis of SBT Family Gene in Gossypium
Source: Int J Mol Sci. 2023 Mar 17;24(6):5760. doi: 10.3390/ijms24065760 (PMC10056545; doi:10.3390/ijms24065760)
Supplement: Supplementary file 1 [file ijms-24-05760-s001.zip › TableS4.xlsx]

## Sheet: Sheet1
ID	leaf_12h_ck_1	leaf_12h_ck_2	leaf_6h_ck_1	leaf_6h_ck_2	leaf_3h_ck_1	leaf_3h_ck_2	leaf_1h_ck_1	leaf_1h_ck_2	leaf_12h_PEG_1	leaf_12h_PEG_2	leaf_6h_PEG_1	leaf_6h_PEG_2	leaf_3h_PEG_1	leaf_3h_PEG_2	leaf_1h_PEG_1	leaf_1h_PEG_2	leaf_12h_salt_1	leaf_12h_salt_2	leaf_6h_salt_1	leaf_6h_salt_2	leaf_3h_salt_1	leaf_3h_salt_2	leaf_1h_salt_1	leaf_1h_salt_2		leaf_1h_PEG/CK	leaf_3h_PEG/CK	leaf_6h_PEG/CK	leaf_12h_PEG/CK	leaf_1h_salt/CK	leaf_3h_salt/CK	leaf_6h_salt/CK	leaf_12h_salt/CK
Gh_A01G1385	7.26876	7.06949	12.6397	12.2616	16.0701	16.4777	12.0652	12.3969	3.50705	3.29536	5.64734	8.62103	19.1033	20.0313	26.2449	25.9254	1.01343	0.913712	3.11825	2.65329	16.3472	14.9482	14.1256	16.7719		1.09279	0.265592	-0.835267	-1.07631	0.331764	-0.0579392	-2.11372	-2.89713
Gh_A02G0839	0.0585192	0.0650457	0	0	0	0	0	0	0.0903504	0.0530605	0.0969931	0	0.0390595	0.0832349	0.0824555	0.0927643	0	0	0	0	0	0	0.0551382	0.060012		-0.95887	-1.57603	-0.40479	0.166403	-1.56331	Na	Na	1.46228
Gh_A02G0947	14.5337	15.3078	7.53136	8.57464	2.07303	1.88943	3.20259	3.09176	11.5363	11.9558	6.65362	6.09008	1.79933	1.83381	3.44061	3.7469	3.45131	3.59496	1.74308	1.85804	2.46563	2.34902	2.1535	2.28375		0.190347	-0.123694	-0.336193	-0.344889	-0.50479	0.282162	-2.15878	-2.0822
Gh_A03G0044	0.164634	0.182996	0.0727069	0.0779566	0.187862	0.221164	0.0840838	0.0998346	0.127093	0.199036	0.181916	0.148772	0.109888	0.156112	0.05155	0.057995	0.12242	0.220749	0.292971	0.412086	0.243041	0.229818	0.20683	0.225112		-0.744733	-0.638087	1.12773	-0.12608	1.23579	0.213451	2.2064	-0.0784141
Gh_A03G0178	0.521408	0.515164	0.307024	0.329192	0.859403	0.856094	0.858075	0.94855	0.49196	0.420241	0.52813	0.523522	0.386691	0.535619	0.870734	0.857146	0.180933	0.291303	0.132552	0.0966744	0.898015	0.79717	0.600457	0.594122		-0.0625273	-0.914358	0.725931	-0.188843	-0.595004	-0.0197385	-1.48976	-1.17473
Gh_A04G0029	1.74301	1.67908	1.61649	1.65067	1.25965	1.32684	1.33531	1.55021	1.92862	2.05454	1.05928	0.997541	0.853156	0.867709	1.20069	1.0745	0.64804	0.555061	1.01914	0.921037	1.06141	1.14704	1.58756	1.37039		-0.341055	-0.587426	-0.668192	0.218566	0.0358796	-0.22856	-0.753617	-1.51219
Gh_A05G0169	3.27833	3.83083	1.78191	1.85086	1.00715	1.01631	1.65288	1.65666	3.56905	3.46795	1.60224	1.59517	0.925764	0.956501	0.848842	0.932758	1.36888	1.41593	1.66682	1.89364	1.65199	1.50868	1.50486	1.12065		-0.895058	-0.104532	-0.18391	-0.0104974	-0.349647	0.641936	-0.0316799	-1.34794
Gh_A05G0776	0.0641647	0.0713208	0	0	0	0	0.0327709	0.0389096	0	0	0	0	0	0	0	0	0.0572546	0	0	0	0	0	0	0		2.25119	Na	Na	1.32941	2.25119	Na	Na	0.544376
Gh_A05G1162	36.9945	39.0449	23.2697	22.4631	25.8343	26.6514	16.0035	16.4182	39.1443	39.4692	31.7706	31.7427	38.5966	38.1779	18.9102	19.2086	14.761	13.8484	30.6171	29.649	43.6731	41.4018	32.0531	32.7322		0.233617	0.548856	0.474054	0.0485423	0.998746	0.69647	0.398156	-1.41047
Gh_A05G1176	21.6984	22.3127	19.1396	18.9556	36.0803	37.0206	61.9587	60.8292	18.6764	17.991	19.5687	18.9786	43.836	42.7045	43.9259	44.0222	8.30894	8.22649	14.1148	14.5703	46.6672	45.9896	74.3992	72.2295		-0.481384	0.243482	0.0168683	-0.263481	0.255902	0.342088	-0.409473	-1.41218
Gh_A05G1581	1.50808	1.67627	1.99802	2.14228	0	0	1.54044	0	1.16419	1.3674	1.24979	0	5.03294	6.43505	0	0	0	0	0	0	1.66972	1.80443	2.84189	4.63965		-1.58987	5.06507	-2.16621	-0.333603	2.82696	3.35197	-3.60525	-3.22538
Gh_A05G1582	0.762488	0.770478	1.46939	1.47702	1.97742	1.86236	0.566438	0.546442	0.267554	0.439958	1.60846	1.25277	1.89693	1.87327	1.13948	1.31857	0.123704	0.104561	1.90314	1.50369	1.45819	1.61731	1.17562	0.995195		1.13961	-0.025763	-0.0535525	-1.15964	0.959171	-0.321488	0.199491	-2.75262
Gh_A05G1760	0.353508	0.523912	0	0	0	0	0.180548	0.285824	0.272899	0.106844	0.195308	0.42593	0.157303	0.0838022	0.22138	0.311322	0.052573	0.0592499	0.269605	0.196632	0.130466	0.0704962	0.333084	0.483368		0.208711	-0.566232	0.762649	-1.3336	0.820749	-0.825889	0.437638	-2.94689
Gh_A05G1761	0	0	0	0	0	0	0	0	0	0	0	0	0	0	0	0	0.0525964	0.0592763	0	0	0	0	0.0555387	0.060448		Na	Na	Na	Na	-1.55287	Na	Na	-1.60625
Gh_A05G1762	0	0	0	0	0	0	0	0	0	0	0.0496422	0	0	0	0	0	0.080176	0.0903585	0	0	0.033161	0.0358365	0	0		Na	Na	-0.887948	Na	Na	-2.302	Na	-0.998047
Gh_A05G1808	7.17716	6.16156	4.56117	5.05628	8.32292	7.44671	4.35103	3.64456	6.12615	5.34369	5.31927	4.48194	6.85469	5.97567	4.35757	3.88489	2.68145	2.46454	3.60463	3.45662	5.84677	5.23632	4.89318	4.54779		0.047148	-0.298751	0.0239357	-0.216946	0.244418	-0.50875	-0.444134	-1.37119
Gh_A05G3884	3.21442	3.45382	1.3486	1.21766	1.16151	0.647721	4.35052	3.67106	2.31602	2.13736	1.90912	1.98489	1.50186	1.48591	2.08848	2.00989	1.19511	1.07751	1.06232	1.29627	1.33461	1.57049	2.42297	2.63714		-0.963907	0.784326	0.603196	-0.582637	-0.660817	0.739093	-0.126995	-1.55395
Gh_A06G0020	0.524404	0.323827	0.385984	0.496624	0.332439	0.234821	0.0892764	0.106	0.179922	0.211327	0.144863	0.263265	0.738933	0.787325	0.0821002	0.184729	0.649902	0.49806	0.0444377	0.0486149	0.161281	0.244011	0.109801	0.0597535		0.340226	1.44888	-1.16475	-1.07953	-0.264214	-0.494064	-3.23568	0.46532
Gh_A06G0166	0	0	0.0776429	0.083249	0	0	0	0	0	0	0	0	0	0	0	0	0	0	0.0446944	0	0	0	0	0		Na	Na	1.08032	Na	Na	Na	0.116635	Na
Gh_A06G0170	42.2557	43.7719	150.845	149.982	116.458	119.285	40.435	41.2475	38.0569	39.4848	175.725	173.42	90.5668	90.4877	46.6394	46.0202	13.0135	12.3645	84.9527	83.6838	91.4254	90.1996	60.3851	60.7273		0.181953	-0.380687	0.214867	-0.149848	0.568313	-0.376181	-0.835052	-1.76147
Gh_A06G1085	38.3107	39.3225	3.04847	3.43201	2.1661	2.31825	2.02715	2.19759	49.2913	48.7674	2.95563	2.755	2.2653	2.25002	1.78316	1.88451	11.2153	10.0944	2.58837	2.49572	1.43301	1.34214	1.7886	1.88771		-0.203375	0.010752	-0.180811	0.337074	-0.199954	-0.692276	-0.34782	-1.86704
Gh_A06G1331	0.161789	0.179833	0.500154	0.536266	0.246154	0.217342	0.110174	0.163516	0.333058	0.342294	0.0893863	0.146201	0.0359962	0.0383536	0.0759889	0.0569928	0.0962439	0.162701	0.123389	0.0899922	0.0895653	0.129055	0.101628	0.110611		-1.02825	-2.63809	-2.17962	0.985119	-0.340211	-1.10527	-2.29712	-0.446891
Gh_A06G1461	72.6779	72.0941	14.403	13.274	11.8474	11.2401	5.11553	4.9257	91.7015	86.9415	20.7516	21.0823	16.3058	16.0272	6.97046	7.03514	22.0439	21.4655	24.8262	22.8286	8.82441	8.00178	8.86196	8.01687		0.48031	0.486341	0.597141	0.302796	0.747726	-0.45763	0.783867	-1.7345
Gh_A06G1462	0.0607993	0.13516	0	0	0	0	0	0	0.0469353	0	0.0503861	0	0	0	0	0	0.0271258	0	0.0463688	0.101455	0.067316	0.0727471	0.0572865	0.0623503		Na	Na	-0.877219	-0.0212574	-1.50817	-1.28054	-1.3095	-0.416761
Gh_A06G2090	0	0	0	0	0	0	0	0	0	0	0	0	0	0	0	0	0	0	0	0	0	0	0	0		Na	Na	Na	Na	Na	Na	Na	Na
Gh_A07G0467	0.298626	0.331931	0.158258	0.169684	0.204455	0.481396	0.244028	0.217305	0.230531	0.27077	0.346472	0.431765	0.0797289	0.0849503	0.0841548	0.0946761	0.0799399	0.120123	0.136649	0.199326	0.19838	0.214386	0.0562745	0.0612488		-1.36729	-1.93057	1.23893	-0.333597	-1.97173	-0.605265	0.0102379	-1.68386
Gh_A07G1432	1.24089	1.63006	1.71876	1.84285	0.707979	0.378855	1.23871	1.33394	0.348338	0.255713	1.86974	2.29362	0.414124	0.401131	1.19213	1.25176	0.0251648	0.0567217	0.12905	0.0941208	1.71736	1.6872	0.265726	0.578428		-0.0735163	-0.345608	0.218579	-2.25257	-1.71316	1.71666	-4.01332	-5.23435
Gh_A07G1757	15.3825	16.3209	7.02492	7.28383	7.97852	8.3753	9.8204	10.2113	11.605	12.0457	6.85684	6.79223	8.01159	8.20475	7.52585	7.66626	7.66884	8.05685	4.57708	4.47257	8.96722	9.16783	12.7369	14.1018		-0.398749	-0.011857	-0.0678749	-0.422373	0.420437	0.14949	-0.660824	-1.01132
Gh_A08G0161	93.1283	100.291	37.3308	38.2603	34.9299	38.4778	19.8931	22.5516	76.1308	78.8055	33.524	35.759	55.6603	56.8007	36.734	37.194	20.7979	21.8506	33.4188	32.6276	34.5517	33.8378	38.9935	39.8376		0.803344	0.617034	-0.126357	-0.319282	0.895933	-0.100548	-0.194731	-2.18061
Gh_A08G0221	0	0	0	0	0.0637414	0.0750407	0	0	0	0	0.0925861	0.0504781	0	0	0	0	0	0.0280875	0	0	0	0	0	0		Na	1.29751	-1.31424	Na	Na	1.29751	Na	-1.29877
Gh_A08G0882	16.0098	17.3855	8.50887	9.5161	4.31293	4.58211	9.32239	9.7643	12.2405	12.8447	9.65162	10.2743	7.83502	7.53954	4.60404	4.74125	5.81299	5.7787	8.76493	8.6915	7.60407	7.7396	10.4233	10.6829		-1.03002	0.789867	0.146201	-0.412002	0.145378	0.787175	-0.0439951	-1.52534
Gh_A08G1149	0.262895	0.292215	0.0870762	0.0933634	0.149993	0.0882909	0	0	0.304422	0.178779	0.0544672	0	0.350946	0.37393	0	0	0.146615	0.033047	0.200498	0.219346	0.291073	0.275238	0.309633	0.471803		Na	1.65439	0.0938575	-0.248634	1.16884	1.29841	1.21776	-1.99345
Gh_A08G1590	0	0	0	0	0	0	0	0	0	0	0	0	0	0	0	0	0	0	0	0	0.033861	0.0365929	0	0		Na	Na	Na	Na	Na	-2.27187	Na	Na
Gh_A08G1591	0.535949	0.397148	0.394483	0.507558	0.611564	0.639977	0.212898	0.252778	0.413738	0.43196	0.394806	0.430498	0.31798	0.296453	0.167816	0.15733	0.318821	0.269484	0.408744	0.496852	0.329664	0.391887	0.448875	0.305345		-0.51368	-1.02689	-0.118193	-0.126079	0.67436	-0.799545	0.010239	-0.654413
Gh_A08G1601	0.115047	0.063939	0	0	0	0	0.0881372	0	0.488472	0.573735	0.143014	0.207924	0.0383949	0.0409094	0.0270175	0	0	0.0578476	0.0438706	0.0959891	0.0636892	0	0.1084	0.058991		-0.852928	-2.10079	0.0205716	2.62583	-0.614213	-0.708207	-1.3894	0.209436
Gh_A08G2147	1.40004	1.22608	0.674504	0.602671	0.532522	0.626921	0.671708	0.643172	2.25984	2.00033	0.843821	0.920105	0.396445	0.331892	0.318821	0.313845	1.07891	1.17327	0.873612	0.884938	0.84551	0.659914	0.759511	0.696124		-1.05512	-0.671645	0.466769	0.698469	0.145688	0.370488	0.463686	-0.219706
Gh_A08G2197	0.15808	0.614986	0.314156	0.336839	0.0901914	0	0.0807363	0.09586	0.793217	0.501669	0.0655027	0.0714244	0.105513	0.112423	0	0.0417646	0.246848	0.278198	0.421962	0.59352	0.0437559	0.0472862	0.0744734	0		-0.0622015	-0.185119	-2.24971	1.01662	0.355021	-1.44478	0.621435	-0.250737
Gh_A08G2564	0	0	0	0	0.147133	0	0.0329271	0.0390951	0	0	0.0534286	0.0582587	0	0	0	0	0	0	0	0.0537907	0	0	0	0		2.24433	0.104207	-1.60742	Na	2.24433	0.104207	-0.830053	Na
Gh_A08G2565	5.99	6.48398	3.42339	3.50372	2.59108	2.99781	4.55892	4.98558	4.23121	4.40179	4.02318	4.10386	3.18804	2.97918	2.86853	2.8548	1.67684	1.41735	2.5678	2.90718	3.22932	3.06827	4.53727	5.21938		-0.736376	0.145061	0.230502	-0.530138	0.0296248	0.175597	-0.34208	-2.01525
Gh_A08G2570	3.6623	3.69446	2.07948	1.96731	0.877941	1.07491	2.04335	2.3328	2.96974	2.73468	0.816149	0.806501	0.390291	0.437738	1.30092	1.52861	0.370728	0.448761	0.798021	0.873036	0.647412	0.736469	0.782934	0.789019		-0.630623	-1.23283	-1.3179	-0.368202	-1.47395	-0.49248	-1.27692	-3.17283
Gh_A09G0896	0	0	0	0	0	0	0	0	0	0	0	0	0	0	0	0	0	0	0	0	0	0	0.060172	0.0654908		Na	Na	Na	Na	-1.43727	Na	Na	Na
Gh_A09G1291	0	0	0	0	0	0	0.0309131	0.0367038	0	0	0	0	0	0	0	0	0	0	0	0	0	0	0	0		2.33539	Na	Na	Na	2.33539	Na	Na	Na
Gh_A09G2501	32.0406	30.435	21.1869	20.4286	14.3094	15.9959	18.1856	18.6621	26.4663	28.4781	19.9267	20.4286	13.3998	14.6865	13.5628	12.9788	8.28958	7.7805	13.8192	13.5345	22.6733	23.6423	14.7966	15.2787		-0.473548	-0.108982	-0.0442349	-0.185812	-0.29306	0.61385	-0.605224	-1.95916
Gh_A10G0049	0.897714	0.997834	0.209888	0.225042	0.421799	0.49657	0.64728	0.832575	0.652245	0.622451	0.743961	0.668062	0.21148	0.225329	0.545647	0.585962	0.518318	0.531042	0.12082	0.0881181	0.2631	0.252736	0.547313	0.649846		-0.376598	-1.068	1.6977	-0.570841	-0.299753	-0.827655	-1.07472	-0.851196
Gh_A10G0304	0	0	0	0.0824157	0.0662025	0.077938	0	0	0	0	0	0	0	0	0	0	0	0	0	0	0	0	0	0		Na	1.24286	0.522272	Na	Na	1.24286	0.522272	Na
Gh_A10G0470	13.9821	13.3489	15.3731	12.6096	25.3555	22.0565	30.283	26.9844	7.9274	6.47044	14.7607	11.6388	17.1162	15.06	26.2411	22.4403	5.51341	4.31745	7.16802	6.97051	21.1335	20.3742	25.2553	23.2634		-0.236357	-0.558709	-0.0871136	-0.931723	-0.237993	-0.188614	-0.977974	-1.48552
Gh_A10G1310	0	0	0	0	0	0	0	0	0	0	0	0	0	0	0	0	0	0	0	0	0	0	0	0		Na	Na	Na	Na	Na	Na	Na	Na
Gh_A10G2024	0	0	0	0	0	0	0.0322607	0.0383038	0	0	0.0523472	0.0570796	0	0	0	0	0	0	0	0	0.139872	0.151157	0.0595162	0.0647771		2.27383	Na	-1.63692	Na	0.820751	-0.225457	Na	Na
Gh_A10G2025	0.0404784	0	0	0	0	0	0	0	0.0312482	0	0.0670912	0.0365782	0	0	0.0190118	0.0427774	0.0180596	0.0203532	0	0	0.112043	0.0726494	0	0		-2.57559	Na	-1.77891	-0.18669	Na	-0.913997	Na	-2.1133
Gh_A10G2026	0	0	0	0	0	0	0	0	0.0493772	0	0	0	0	0	0	0	0	0	0	0	0.0708181	0.0382659	0.0602669	0.065594		Na	Na	Na	-0.891809	-1.435	-1.70737	Na	Na
Gh_A10G2027	0.063363	0	0	0.0900097	0.0723026	0.0851195	0.0647229	0.0768469	0	0.114905	0	0	0.0422925	0.0450622	0.0297602	0	0	0	0	0.0528667	0	0	0.0597021	0.0649794		0.0122919	-0.845609	0.458691	0.429365	-0.17925	1.11569	-0.383861	0.711911
Gh_A10G2239	1.16534	1.03625	0.540378	0.331083	0.465414	0.391369	0.922522	0.953999	1.43938	1.05664	0.531163	0.473877	1.28341	1.28458	0.301034	0.33867	0.363945	0.49806	0.711003	0.534764	0.709636	0.697173	1.81172	1.55359		-1.55488	1.58905	0.246253	0.166404	0.838625	0.720776	0.543798	-1.36797
Gh_A11G0092	28.7995	31.1009	18.5787	17.4069	8.5241	8.67072	4.70212	5.12597	28.5809	29.1135	28.1027	28.2155	14.499	15.3786	3.30852	3.51441	16.8396	18.2864	29.7602	31.6009	12.896	12.976	6.14331	6.95514		-0.525834	0.796517	0.646944	-0.0531302	0.41298	0.589463	0.770021	-0.770186
Gh_A11G0221	1.6676	0	4.41874	4.73779	1.90287	4.48038	2.55508	4.04494	0	0	1.38199	1.50692	0	0	0	0	1.48801	1.67699	0	0	1.84634	1.9953	0	0		-4.24114	-4.10229	-1.66475	-1.64708	-4.24114	-0.605262	-4.75032	1.56894
Gh_A11G0757	0	0.0666807	0	0	0.0684539	0.161177	0.0919165	0.145513	0	0	0	0.05421	0.0400413	0	0	0	0.0267648	0.0603281	0	0	0.0664202	0.0358895	0.0565242	0.123041		0.555763	-0.348378	-0.824452	0.675097	-0.471732	-1.10526	Na	-1.40578
Gh_A11G1366	8.91183	9.46688	5.97828	6.49005	6.24309	6.44053	3.48568	3.65977	7.44573	7.46681	4.58087	4.4853	6.62598	7.50116	4.84798	4.88781	2.91912	2.46739	3.01117	3.38835	5.77659	5.70274	6.16484	6.0735		0.446689	0.152904	-0.458567	-0.300853	0.776699	-0.143783	-0.963526	-1.77505
Gh_A11G3111	0.93583	0.762813	0	0	0.142382	0.167621	0.223047	0.264828	0.481623	0.509121	0.258516	0.394642	0.291495	0.266216	0.0879076	0.0659321	0.278349	0.28233	0.333067	0.260269	0.172689	0.111973	0.117568	0.319901		-1.67465	0.850549	0.909864	-0.770832	-0.325641	-0.151821	0.792373	-1.59165
Gh_A12G0208	0.065406	0.0727005	0	0	0.0746338	0.0878639	0	0	0	0	0	0	0	0	0	0	0	0	0	0	0.0362082	0.0782591	0.061627	0		Na	1.06991	Na	1.30177	-0.73195	-0.605262	Na	1.30177
Gh_A12G0209	0	0	0	0	0	0	0	0	0	0	0	0	0	0	0	0	0.0308733	0.0347943	0	0	0	0	0	0		Na	Na	Na	Na	Na	Na	Na	-2.37486
Gh_A12G0221	0	0	0	0	0	0	0	0	0	0	0	0	0	0	0	0	0	0	0	0	0	0	0	0		Na	Na	Na	Na	Na	Na	Na	Na
Gh_A12G0939	83.3706	85.2526	12.4522	12.4448	22.3102	21.1991	9.86716	9.9916	139.155	136.931	12.3086	11.6912	41.164	39.6925	16.9763	16.9835	15.013	14.2943	28.3181	26.9623	18.1466	17.2157	28.2072	27.6067		0.774081	0.894272	-0.053427	0.711358	1.49079	-0.299141	1.15036	-2.52482
Gh_A12G0940	3.08373	3.16895	2.69802	2.64487	1.19506	1.40691	1.27779	1.623	3.14412	3.27088	1.78408	1.73506	1.04856	1.03447	1.17508	1.07604	0.804722	0.731391	0.843105	1.06799	2.54458	3.06316	1.15126	0.954684		-0.356912	-0.316156	-0.602466	0.0368269	-0.458002	1.10642	-1.49321	-2.0267
Gh_A12G0941	2.44366	2.42255	0.525009	0.469096	0.602902	0.621055	0.573429	0.560696	1.58053	1.37733	0.109466	0.179044	0.573073	0.610603	0.496316	0.488571	0.677721	0.63096	0.151108	0.165313	0.475304	0.592676	0.808977	0.812755		-0.203503	-0.0488455	-1.82571	-0.721644	0.516043	-0.205275	-1.65072	-1.89559
Gh_A12G2124	25.014	16.6822	19.8843	26.0578	28.5431	8.96076	16.1822	9.10112	20.5974	13.6084	27.6397	27.1246	18.9221	23.7191	25.8467	23.7912	14.1361	19.2854	13.9898	13.9135	25.8488	25.939	7.85626	10.2608		1.03094	0.405643	0.266499	-0.287043	-0.434733	0.695193	-0.706242	-0.307076
Gh_A12G2187	1.24535	1.02314	0.43042	0.384581	0.556064	0.581899	0.276539	0.262673	0.794181	0.736424	0.987186	1.0275	0.505965	0.346564	0.152586	0.114442	0.869663	0.843986	1.03236	0.903525	0.479594	0.291537	0.510174	0.333162		-1.02826	-0.44193	1.30768	-0.561703	0.613231	-0.605264	1.2472	-0.397868
Gh_A13G0001	0.0932027	0.103597	0.123482	0.132398	0.106352	0.25041	0.571218	0.395628	0.1439	0.169017	0.308959	0.421112	0.373257	0.331418	0.350202	0.344737	0	0	0.284326	0.155527	0.82554	1.00366	0.614725	0.382321		-0.452251	1.10784	1.49622	0.666405	0.0282698	2.4797	0.717765	0.790822
Gh_A13G0281	7.30549	6.71359	1.21939	1.22572	1.57534	1.00457	1.49833	1.63947	7.90437	8.60602	1.38247	1.29953	0.614319	0.818187	1.64807	1.42858	3.20804	3.32624	1.31612	1.43984	1.30563	1.4798	1.1924	1.76973		-0.0306128	-0.827339	0.132725	0.235966	-0.109594	0.143953	0.171205	-1.10024
Gh_A13G1017	50.3924	42.4095	26.7055	19.4301	24.6437	18.3744	9.9271	6.11161	52.7949	39.8171	26.8467	22.7685	23.5446	19.4548	19.2727	19.3998	21.8404	18.0987	25.8043	21.623	23.1145	23.2567	15.6009	12.5503		1.31177	0.00830317	0.118177	-0.0119035	0.845141	0.123764	0.052374	-1.21735
Gh_A13G1684	50.6478	47.4386	46.6118	44.4429	28.8294	25.0584	22.1591	21.9071	26.6582	25.8519	22.9434	19.3633	25.6891	23.5092	20.7938	20.6487	8.03263	6.55956	23.9054	22.5572	31.2734	29.3822	25.9743	24.2749		-0.0885467	-0.129227	-1.11062	-0.900856	0.188626	0.173522	-0.970862	-2.75547
Gh_D02G0889	0.0585192	0.0650457	0	0	0.0667754	0.0786125	0.0298876	0.0354862	0.0451752	0.0530605	0.0484965	0.0528808	0	0	0	0	0	0	0.04463	0.0488253	0.0647915	0.105028	0	0		2.38406	1.23043	-1.74715	-0.333597	2.38406	0.187216	-1.86464	1.46228
Gh_D03G0815	6.38781	6.70938	10.5594	11.1554	8.35898	8.58114	7.12351	6.96534	4.20736	4.46352	6.65362	6.46078	4.53744	4.50118	5.25725	5.45003	2.22243	2.41629	4.20128	4.05835	4.76906	4.97853	6.84701	6.85125		-0.396105	-0.906157	-0.727139	-0.595202	-0.0404704	-0.797536	-1.3942	-1.49828
Gh_D03G1406	0.463474	0.57956	0.153512	0.246894	0.396648	0.23348	0.621365	0.632366	0.178895	0.21012	0.336082	0.314113	0.309352	0.370813	0.408156	0.428573	0.180933	0.174782	0.220919	0.193349	0.416935	0.485234	0.382109	0.237649		-0.58377	0.154391	0.738927	-1.41856	-1.05669	0.563672	0.0862408	-1.54322
Gh_D03G1832	0.054804	0.0609161	0	0	0	0	0	0	0.0846143	0.149075	0	0	0	0	0	0	0	0	0	0	0	0	0	0		Na	Na	Na	0.958882	Na	Na	Na	1.55691
Gh_D05G0233	1.80542	1.72675	0.55627	0.775364	0.383281	0.451224	0.557538	0.560134	1.42614	1.37052	0.695907	0.948524	0.420367	0.328457	0.374681	0.377154	1.16141	1.20335	0.736486	0.735655	0.371893	0.502373	0.474727	0.301402		-0.572013	-0.162446	0.30696	-0.336777	-0.563028	0.0557001	0.164514	-0.57873
Gh_D05G0906	0.505059	0.842081	0.802972	1.07619	0.115263	0.203543	0.257949	0.306269	0.584838	0.503741	0.711547	0.684594	0.303398	0.25143	0.189772	0.266872	0.630935	0.736461	0.847409	0.884928	0.503274	0.513664	0.0951758	0.414355		-0.320735	0.850553	-0.413501	-0.264846	-0.501176	1.73095	-0.102296	0.0638448
Gh_D05G1060	4.87544	5.54234	1.68824	1.81014	2.40233	2.75376	5.51769	5.40901	2.86554	3.16478	1.23967	1.05136	1.51615	1.57604	2.99246	3.13239	1.73027	1.75501	0.802809	0.785825	1.77889	1.88927	3.54972	3.40896		-0.835417	-0.73456	-0.614704	-0.787558	-0.651196	-0.488515	-1.13811	-1.57678
Gh_D05G1339	56.7171	57.7241	34.0155	33.2388	26.7665	27.8272	14.4538	15.1444	57.0723	58.0399	50.3397	52.3596	40.6219	40.2943	16.4711	16.9887	17.2862	17.0464	42.8995	40.5544	45.2559	44.9276	24.0261	22.4996		0.17714	0.567955	0.610545	0.0084391	0.652134	0.724392	0.310879	-1.73693
Gh_D05G1759	5.06207	5.11512	3.96302	3.59544	5.57934	5.02287	3.11418	3.1743	3.3749	3.7032	5.62523	5.56198	8.10133	8.01824	4.26877	4.22495	1.25755	1.18588	5.2206	5.51937	6.20969	5.91918	7.47961	6.72497		0.433732	0.606419	0.567371	-0.525439	1.1736	0.195656	0.507975	-2.05896
Gh_D05G1955	0	0	0	0	0	0	0.0301924	0.0358481	0	0	0	0	0	0	0	0	0	0	0	0	0.0981786	0.1061	0.0557006	0.0606241		2.36942	Na	Na	Na	0.820751	-0.736082	Na	Na
Gh_D05G1956	0	0	0	0	0	0	0	0	0	0	0	0	0	0	0	0	0	0	0	0	0.0994831	0.143346	0.0564407	0.0614297		Na	Na	Na	Na	-1.52963	-0.509522	Na	Na
Gh_D05G2004	28.7086	29.5755	35.4843	35.2282	64.9187	64.4336	29.5036	28.9442	13.6037	14.0206	46.6645	45.4521	70.6111	70.5047	32.9147	32.9908	7.8621	7.1589	33.1537	30.8662	55.0113	53.0963	55.2545	53.9153		0.173315	0.125584	0.38138	-1.07717	0.901311	-0.259054	-0.144357	-1.95754
Gh_D05G2497	9.88828	10.0752	4.055	3.6789	3.49247	3.7953	2.82573	2.64121	6.22492	5.97726	5.70702	5.95702	3.57504	3.43243	2.15628	2.05266	2.83609	2.90033	4.17467	4.27245	3.09546	3.13393	3.4384	3.56126		-0.376892	-0.055636	0.594176	-0.710458	0.357151	-0.225167	0.128875	-1.79917
Gh_D05G3705	1.56871	1.74366	1.30859	1.32054	0.994459	0.780496	1.0089	1.02173	1.70437	1.73846	0.722239	0.840035	0.930715	0.909028	1.52815	1.5964	0.492511	0.438206	0.664656	0.533232	0.836259	0.695176	0.930637	0.893735		0.621406	0.0621805	-0.755036	0.0576755	-0.154794	-0.208488	-1.14281	-1.83189
Gh_D06G0158	0.0617242	0.0686082	0.0817772	0	0	0	0	0	0	0	0.0511526	0.055777	0.0411987	0.0438968	0.0289905	0.032615	0	0	0	0	0	0	0	0		-2.4669	-1.99911	-1.14234	1.38535	Na	Na	0.527882	1.38535
Gh_D06G0164	119.255	122.313	73.9452	73.115	38.7078	39.2623	23.6495	23.4175	117.795	119.465	73.928	74.5125	34.3934	34.6842	22.9062	23.0101	21.6542	21.66	46.1914	45.7837	30.7026	30.2655	28.3677	28.2873		-0.0356957	-0.174679	0.0134897	-0.0258806	0.267503	-0.354867	-0.677083	-2.4794
Gh_D06G1476	71.2996	70.0703	14.3633	12.5485	19.6361	21.4217	18.2221	18.3658	67.44	65.6369	19.1573	18.6084	20.9044	20.8456	16.9729	16.7308	10.3647	9.46018	12.1615	11.1511	13.1464	13.3834	17.1869	16.7061		-0.118486	0.0254841	0.491973	-0.0872927	-0.110513	-0.628734	-0.205197	-2.83554
Gh_D06G1660	0.107716	0.11973	0.0713557	0.0765078	0.0614568	0.0723511	0.0550141	0.0653195	0.0831541	0.0488342	0.0892677	0.0486689	0	0	0.025296	0.0284586	0.024029	0	0.0821505	0.0898728	0	0	0.0507465	0.0552321		-1.15977	1.35017	-0.164749	-0.833597	-0.17925	1.35017	0.217759	-0.829317
Gh_D06G1794	14.1875	14.2808	16.6186	15.3965	12.2287	11.6153	6.74841	6.86789	8.46104	8.22637	15.1385	15.5167	10.6076	10.5661	4.80462	5.05139	2.41782	2.81674	11.9811	12.1929	9.9103	9.98131	5.85199	5.68239		-0.466656	-0.170878	-0.0616786	-0.770731	-0.239495	-0.260998	-0.4043	-2.44741
Gh_D06G1795	0	0	0	0	0	0	0	0	0	0	0	0	0	0	0	0	0	0	0	0	0	0	0	0		Na	Na	Na	Na	Na	Na	Na	Na
Gh_D06G2355	9.17709	8.22373	3.58159	4.34548	3.97768	4.58722	0.690337	0.819652	8.18282	6.90195	5.77768	5.65715	5.793	6.12178	1.16945	1.05253	1.90437	1.60967	5.9681	5.81685	3.8595	3.78785	1.54169	1.31319		0.560618	0.479357	0.535225	-0.209114	0.919566	-0.159877	0.578697	-2.31088
Gh_D06G2361	0.983101	1.09274	0.407028	0.698267	0.631014	0.247624	0.0941437	0.0372597	1.80245	1.55994	0.458282	0.61076	0.615173	0.699158	0.173153	0.0974004	1.12395	1.29759	1.17151	1.38417	0.78234	0.624906	0	0.252045		1.13271	0.730394	-0.0110328	0.694044	1.8053	0.822806	1.25617	0.220525
Gh_D07G0532	0	0	0	0	0	0	0	0	0	0	0.049496	0.0539706	0	0	0	0	0.0266466	0	0	0	0.132254	0	0.0562745	0		Na	Na	-1.71772	Na	-0.797491	-0.181112	Na	-1.33676
Gh_D07G1515	0	0.190035	0	0	0	0	0	0	0	0	0	0	0	0	0	0	0.152556	0.257896	0.130389	0.142646	0	0.102282	0.16109	0		Na	Na	Na	-0.0803652	-0.0388339	-0.366491	-0.317904	0.142164
Gh_D07G1529	2.70739	2.69587	1.49457	1.44223	1.15851	1.21234	1.93009	1.53916	0.696677	0.715995	3.87972	3.72076	0.602362	0.722037	1.35108	1.5796	0.352308	0.397052	0.387151	0.376483	1.99839	2.22711	1.0629	1.09901		-0.238569	-0.845609	1.37176	-1.93554	-0.6733	0.831973	-1.9432	-2.85267
Gh_D07G1962	16.5478	17.5514	9.34082	9.35309	10.5051	11.1149	8.51101	8.90399	11.7849	12.3098	7.62944	7.73998	9.7228	9.86228	7.69005	8.0973	6.23906	6.50408	5.73246	5.8824	10.1607	10.2833	12.7918	13.0263		-0.141674	-0.142074	-0.282543	-0.500739	0.56836	-0.0801409	-0.686717	-1.4197
Gh_D08G0012	0	0	0	0	0	0	0.0309131	0.0367038	0.0467253	0.0548811	0	0	0	0	0	0	0	0	0	0	0.0670147	0.0724215	0	0		2.33539	Na	Na	-1.74721	2.33539	-1.28702	Na	Na
Gh_D08G0013	5.9041	6.37719	3.3145	3.07998	2.28376	2.59897	4.41238	4.89505	5.61356	5.41385	4.11888	4.2501	2.84983	2.8704	2.58502	2.73196	2.72343	2.8345	3.51065	3.39537	3.37926	3.27274	4.43153	5.13112		-0.806384	0.231388	0.389018	-0.154534	0.037099	0.448928	0.111797	-1.14306
Gh_D08G0018	0.0311299	0	0	0	0	0	0	0	0	0	0.0515964	0.0843914	0	0	0	0	0.0138887	0	0	0	0	0	0	0		Na	Na	-1.36528	1.22458	Na	Na	Na	-0.582195
Gh_D08G0019	0	0	0	0	0	0	0.175149	0.207958	0	0	0	0	0	0	0	0	0	0	0	0	0	0	0	0		-0.166903	Na	Na	Na	-0.166903	Na	Na	Na
Gh_D08G0020	0.183775	0.13618	0.0811599	0.348079	0.0699009	0.082292	0.281578	0.185736	0.0945793	0.111088	0	0.0553559	0.0408877	0.0435654	0.201401	0.226581	0	0.0308017	0.42047	0.204442	0.0339121	0.0732963	0.057719	0.062821		-0.0983452	-0.845607	-0.792955	-0.626078	-1.92518	-0.605261	0.80272	-1.12842
Gh_D08G0220	57.5165	63.206	22.8319	22.1637	18.9201	19.0608	12.994	12.9227	51.3676	50.8204	17.9759	18.3729	24.1662	24.3184	17.9754	18.9301	12.8306	12.7107	16.7915	18.2792	20.3744	20.5547	20.028	20.2931		0.509476	0.352255	-0.307803	-0.238886	0.637627	0.107849	-0.360658	-2.2392
Gh_D08G0301	0	0	0	0	0	0	0.0580991	0.0689824	0.0439085	0	0	0	0	0	0	0	0.0253765	0.0285994	0.130136	0.0949125	0	0.0680558	0.107184	0.116659		1.42509	Na	Na	-0.976481	0.82075	-0.660372	-0.61319	-2.65772
Gh_D08G1072	3.27464	3.67419	2.29204	2.45753	1.09279	1.12051	1.2149	1.38628	2.24175	2.29691	1.53611	1.67498	1.19595	1.31821	0.754503	0.832509	2.86685	2.85815	1.50788	1.62384	1.88122	1.73729	1.86291	1.83749		-0.71146	0.182283	-0.565208	-0.612221	0.511619	0.708168	-0.600955	-0.277107
Gh_D08G1431	0	0	0	0	0	0	0	0	0	0	0	0	0.0399232	0	0	0	0	0	0.0912338	0.049905	0.0662243	0.0357837	0	0.122678		Na	-1.04512	Na	Na	-0.235329	-1.80413	-1.33309	Na
Gh_D08G1900	0	0	0	0	0	0	0	0	0	0	0	0	0	0	0	0	0.0545788	0.0307552	0	0.0510335	0.033861	0.0365929	0	0		Na	Na	Na	Na	Na	-2.27187	-0.868009	-2.05288
Gh_D08G1912	0.575236	0.63939	0	0.163429	0.0656393	0.077275	0.146895	0.13953	0.399659	0.417262	0.381371	0.415849	0.115185	0.0818187	0.0810526	0.151977	0.0256643	0	0.175482	0.191978	0	0.0688277	0.0542001	0.058991		-0.367289	0.446875	1.25653	-0.570564	-1.34021	0.602945	0.139033	-3.19874
Gh_D08G2514	2.29097	1.88628	0.955547	0.602671	0.629344	0.740906	0.693376	0.823261	2.29259	1.73106	1.26573	1.30348	0.311492	0.392236	0.338747	0.336263	1.6089	1.53592	1.39131	1.62829	0.798537	0.634533	0.519666	0.696124		-1.16259	-0.966111	0.759248	-0.0614342	-0.329029	0.0599576	0.98798	-0.403162
Gh_D08G2562	4.28426	4.10973	1.16633	1.41728	1.33937	1.26144	0.929195	0.782954	4.30406	3.88462	1.31319	1.27281	1.52773	1.58604	1.13015	1.05437	0.497498	0.354114	1.07422	0.832431	1.2346	1.15866	0.884763	0.902785		0.355921	0.260096	0.00799595	-0.037309	0.0673823	-0.120063	-0.443204	-3.32152
Gh_D09G0438	30.3724	30.2431	13.0322	12.5023	12.734	10.8185	14.4839	15.139	26.7328	26.2875	14.5398	13.0473	9.98268	9.04097	10.753	10.608	7.64798	7.34664	11.3186	10.8948	15.7631	15.5206	12.195	11.3853		-0.471414	-0.305069	0.109742	-0.19319	-0.329629	0.414275	-0.200969	-2.01553
Gh_D09G0922	0	0	0	0	0	0	0	0	0	0	0	0	0	0	0	0	0	0	0	0	0	0	0	0		Na	Na	Na	Na	Na	Na	Na	Na
Gh_D09G1326	0	0	0	0	0	0	0	0	0	0	0	0	0	0	0	0	0	0	0	0	0	0	0	0		Na	Na	Na	Na	Na	Na	Na	Na
Gh_D10G0056	1.84824	1.93697	0.489738	0.450084	0.542313	0.709386	0.91698	1.1528	0.652245	0.57457	0.787724	0.715781	0.387713	0.488213	0.793668	0.837089	0.447638	0.345177	0.201366	0.220295	0.643134	0.568655	0.597069	0.595692		-0.335022	-0.511598	0.677502	-1.62796	-0.785748	-0.0365118	-1.15647	-2.26707
Gh_D10G0306	0	0	0	0	0	0	0.0592622	0	0	0	0	0	0	0	0	0	0	0	0	0	0.0321178	0.0347091	0	0		0.760175	Na	Na	Na	0.760175	-2.34812	Na	Na
Gh_D10G0493	8.58653	7.54505	3.76642	3.37904	4.36936	4.28659	4.26688	3.6589	3.9861	4.20842	3.99068	3.14562	4.33713	4.24982	3.86941	3.61742	2.66611	2.36293	3.31853	2.85597	4.84979	3.78329	6.01316	5.47374		-0.0787584	-0.011555	-0.00991416	-0.974675	0.538029	-0.0148444	-0.212641	-1.68115
Gh_D10G1396	0	0	0	0	0	0	0	0	0	0	0	0	0	0	0	0	0	0	0	0	0	0	0	0		Na	Na	Na	Na	Na	Na	Na	Na
Gh_D10G2586	1.10707	1.10101	0.540378	0.331083	0.265951	0.234821	0.357105	0.353333	0.494786	0.475487	0.338013	0.263265	0.155565	0.290067	0.355768	0.461823	0.155976	0.175786	0.444377	0.486149	0.354818	0.557738	0.494106	0.597535		0.19045	-0.234409	-0.503784	-1.18661	0.613233	0.831972	0.13601	-2.73714
Gh_D11G0095	32.0103	33.2132	14.4115	15.2659	8.56149	8.18656	5.87347	5.86109	36.9781	38.2337	21.6676	22.8862	13.3837	13.2815	3.83173	4.08572	15.8456	16.7708	23.2134	23.646	11.5175	11.3099	7.87208	7.25754		-0.568398	0.671316	0.586242	0.205611	0.365422	0.447075	0.65951	-1.00013
Gh_D11G0235	0	0	0	2.36889	3.80575	2.24019	5.11017	6.06742	0	1.51204	5.52795	3.01385	0	0	0.783234	1.76231	5.95205	10.9005	2.54361	1.39135	0.92317	0.997652	3.1425	3.42028		-2.24474	-4.10229	2.68527	1.57644	-0.764214	-1.60526	1.56777	5.56625
Gh_D11G0885	0.120158	0.200338	0.0795975	0.0853447	0.0685553	0.0807079	0.0306842	0.036432	0	0.0544748	0.0497892	0.0542903	0.160402	0.0854535	0.0846533	0.0952369	0.0268045	0.0302087	0	0	0	0	0.113216	0		1.42519	0.654391	-0.664749	-0.689087	2.05288	1.19247	1.04445	-2.44689
Gh_D11G1511	0	0	0	0	0.0643617	0.075771	0	0	0.0435423	0.0511425	0	0	0	0.0401131	0	0	0.100659	0.198526	0.172067	0.235302	0.0936744	0.101232	0.10629	0.0578428		Na	0.241844	Na	-1.84899	-1.11643	0.4797	0.243207	-0.266133
Gh_D11G1939	0.705282	0.718612	0.389339	0.333961	0.268262	0.236862	0.660384	0.570246	0.499087	0.586202	0.292244	0.265553	0.274605	0.334386	0.303651	0.248447	0.681773	0.591046	0.268943	0.245187	0.553121	0.562586	0.166133	0.120546		-1.15977	0.265591	-0.372267	-0.396362	-2.11648	1.14599	-0.489762	-0.165426
Gh_D11G2004	154.847	156.13	114.955	113.123	105.801	103.889	128.517	129.751	112.302	110.74	135.555	132.949	134.475	130.874	108.026	106.177	53.4117	52.1928	87.2111	86.0649	157.967	154.279	182.556	179.107		-0.269927	0.33956	0.235395	-0.479516	0.485728	0.574384	-0.39644	-1.55822
Gh_D12G0210	0.0651958	0	0	0	0	0	0.0332975	0	0.100659	0.118228	0	0.0589141	0	0	0	0	0	0	0	0	0.144367	0.117011	0.061429	0.0668589		1.17602	Na	-0.764425	0.0513311	-0.231419	-0.387342	Na	0.691342
Gh_D12G0211	0	0	0	0	0	0	0	0	0.0496905	0.0583639	0	0	0	0	0	0	0	0	0.0490908	0.0537054	0	0	0	0		Na	Na	Na	-1.65844	Na	Na	-1.7272	Na
Gh_D12G1029	102.027	104.573	12.4645	11.6213	19.1369	19.6248	11.1618	11.6936	129.962	129.122	6.82816	6.65338	32.8017	32.1655	15.0951	14.6665	18.0672	16.3364	19.0295	18.6731	14.9776	14.6129	22.7943	21.8129		0.381158	0.745125	-0.836434	0.326682	0.964783	-0.389493	0.647301	-2.58793
Gh_D12G1030	0.53832	0.664841	0.633964	0.764705	0.409512	0.241053	0.274936	0.362709	0.55409	0.596572	0.446121	0.486452	0.359309	0.297764	0.337116	0.347657	0.0533718	0.0902253	0.0912338	0.149715	0.827804	0.67989	0.732647	0.797409		0.116501	0.0580692	-0.579786	-0.0573284	1.27526	1.25567	-2.57472	-3.10786
Gh_D12G1031	5.01818	4.86439	1.46885	1.32624	2.53017	2.66514	3.15897	3.29072	5.27029	4.97334	1.0155	0.896388	2.0642	1.99189	2.43914	2.68243	2.34301	2.52322	0.84553	0.730272	1.87355	1.88507	4.72824	4.78715		-0.333972	-0.356862	-0.548822	0.0513371	0.561306	-0.466527	-0.828798	-1.0229
Gh_D12G2304	1.6676	1.85358	4.41874	0	1.90287	4.48038	4.25847	2.02247	0	1.51204	2.76397	1.50692	2.22613	2.37191	1.56647	1.76231	0.744006	0.838496	0	0	2.76951	1.9953	4.71376	3.42028		-0.820734	-0.345605	1.23555	-1.79399	0.45227	-0.312781	-2.35001	-1.15441
Gh_D12G2367	1.02877	1.20369	0.43042	0.384581	0.24714	0.290949	0.193577	0.197005	1.12857	1.17828	0.85257	0.636073	0.108421	0.0770143	0.0508621	0.057221	0.917978	0.952887	0.578123	0.496939	0.299746	0.388716	0.306104	0.222108		-1.85593	-1.55313	0.855989	0.051397	0.417072	0.348181	0.397706	-0.250738
Gh_D13G0016	1.23062	1.24352	0.889324	0.953536	0.829781	0.90173	0.885637	1.05154	0.561367	0.557914	0.60264	0.707668	0.746724	0.755845	0.683086	0.679816	0.274523	0.281262	0.426609	0.513382	1.26963	1.10434	1.47575	1.37674		-0.501968	-0.20338	-0.495814	-1.14434	0.562707	0.453011	-0.976525	-2.15441
Gh_D13G0300	9.32806	10.5581	2.93893	2.82793	1.81729	1.98662	3.89264	4.6908	9.2647	7.99377	3.06389	3.64926	2.61954	2.34613	3.01874	3.42621	4.13637	4.31851	2.81961	2.70501	4.12485	3.84515	5.14485	3.9664		-0.410011	0.383746	0.213966	-0.205618	0.0801881	1.06764	-0.0619539	-1.23148
Gh_D13G1265	103.351	82.7791	60.4091	46.4191	71.9732	60.231	25.2278	14.7464	122.609	97.1553	70.5351	57.6838	71.0119	52.4232	63.8892	49.3902	48.8227	35.918	48.6835	41.8471	78.6695	65.922	43.6776	37.4073		1.54221	-0.10985	0.268512	0.238769	1.06742	0.129299	-0.230462	-1.14324
Gh_D13G2322	4.21731	4.48818	4.8147	5.03488	2.61094	2.89296	2.45179	2.82945	1.59319	1.66788	4.83352	4.82452	2.42561	2.52065	1.49612	1.49352	2.00167	1.98518	2.70311	2.73261	2.58304	2.65724	2.45183	2.53052		-0.817207	-0.152486	-0.0279718	-1.41626	-0.0805321	-0.0690586	-0.857252	-1.12599
Gh_Sca004818G01	0.550493	0.5439	0.243112	0.260666	0.139591	0.082168	0.0937179	0.0741823	0.755494	0.720983	0.20276	0.276362	0.163304	0.173999	0.114913	0.1616	0.300183	0.276797	0.373188	0.408268	0.304749	0.512301	0.115264	0.188179		0.708713	0.654392	-0.0887456	0.43166	0.820752	1.88338	0.632798	-0.924698
Gh_Sca004818G02	0.0651958	0.0724668	0	0	0	0	0	0.0395348	0	0	0	0	0	0	0	0	0	0	0	0	0	0	0	0		1.05217	Na	Na	1.30641	1.05217	Na	Na	1.30641
Gh_Sca004818G03	0	0	0.0839484	0	0	0	0	0	0	0	0.0525107	0	0	0	0	0	0	0	0	0	0	0	0	0		Na	Na	-0.338446	Na	Na	Na	0.50898	Na
Gh_Sca004818G04	0	0	0	0	0	0	0	0	0	0	0	0	0	0	0	0	0.0271258	0.0305709	0	0	0	0	0	0		Na	Na	Na	Na	Na	Na	Na	-2.56155
Gh_Sca004818G05	0	0	0	0	0.135903	0.159994	0.030414	0	0	0	0.148052	0.107624	0	0	0	0	0	0	0	0	0.0988991	0.106878	0	0		1.24136	0.205237	-0.429483	Na	1.24136	-0.5203	Na	Na
Gh_Sca004818G06	0	0	0	0	0	0	0	0	0.0442185	0.0519368	0.0474695	0.103522	0.0382323	0.0407361	0.0538062	0.0302666	0.0255556	0	0	0	0.0634194	0.0685362	0	0		-2.07471	-2.10691	-1.27803	-1.82676	Na	-1.36657	Na	-1.36691
Gh_Sca005023G04	33.0568	30.5103	30.9703	27.085	17.7826	15.9391	13.7176	12.278	13.8531	14.2908	14.7738	13.0156	16.824	15.8687	12.3931	11.3848	7.26887	6.55956	17.8728	15.662	16.4373	14.7264	13.5155	12.2888		-0.127729	-0.0431659	-1.06255	-1.17447	-0.0100724	-0.113829	-0.791673	-2.20138
Gh_Sca011376G01	0.0722809	0.0803422	0	0	0.0824787	0.0970995	0.18458	0.219156	0	0	0.0599012	0.0653165	0.0964899	0.102809	0.0339487	0.0381931	0.0322484	0.036344	0.110251	0.120615	0.0400141	0.0432425	0	0		-2.4817	0.154394	-1.44245	1.15758	-0.242567	-1.10526	-0.559934	-1.15441
Gh_Sca012292G01	0	0	0	0	0	0	0	0	0	0	0	0	0	0	0	0	0	0	0	0	0	0	0	0		Na	Na	Na	Na	Na	Na	Na	Na
Gh_Sca089082G01	0	0	0	0	0	0	0	0	0	0	0	0	0	0	0	0	0	0	0	0	0	0	0	0		Na	Na	Na	Na	Na	Na	Na	Na
Gh_Sca122440G01	0	35.0959	0	44.8529	0	21.208	8.06304	19.1469	0	0	39.2501	28.5323	10.5374	0	7.41492	8.34196	0	7.93809	0	0	17.4794	0	0	16.19		-0.659773	-0.504545	3.59921	-3.84481	-2.90486	-0.139476	-4.02176	-1.07222
Gh_Sca133970G01	0	0	0	0	0	0	0	0	0	0	0	0	0	0	0	0	0	0	0	0	0	0	0	0		Na	Na	Na	Na	Na	Na	Na	Na
Gh_Sca168900G01	0	0	0	0	0	0	0	0	0	0	0	0	0	0	0	0	0	0	0	0	0	0	0	0		Na	Na	Na	Na	Na	Na	Na	Na
Na:The denominator is 0 when you calculate the ratio
