# Supplementary material for: Genome-Wide Investigation and Co-Expression Network Analysis of SBT Family Gene in Gossypium
Source: Int J Mol Sci. 2023 Mar 17;24(6):5760. doi: 10.3390/ijms24065760 (PMC10056545; doi:10.3390/ijms24065760)
Supplement: Supplementary file 1 [file ijms-24-05760-s001.zip › TableS5.xlsx]

## Sheet: network
node1	node2	PCC	MR	Relationship
Cotton_A_03377	Cotton_A_34998	0.88	10.9545	positive
Cotton_A_03171	Cotton_A_34998	0.9	3.16228	positive
Cotton_A_15098	Cotton_A_35816	0.94	25.4755	positive
Cotton_A_08556	Cotton_A_39398	0.92	11.7473	positive
Cotton_A_03377	Cotton_A_26662	0.85	25.6905	positive
Cotton_A_18889	Cotton_A_38407	0.87	19.3907	positive
Cotton_A_08556	Cotton_A_30270	0.86	17.5499	positive
Cotton_A_08556	Cotton_A_19980	0.89	9.94987	positive
Cotton_A_03171	Cotton_A_19980	0.89	4	positive
Cotton_A_26205	Cotton_A_35816	0.93	27.2764	positive
Cotton_A_03171	Cotton_A_27340	0.83	23.3238	positive
Cotton_A_07447	Cotton_A_22275	0.95	2.82843	positive
Cotton_A_05085	Cotton_A_07447	0.91	22.0907	positive
Cotton_A_07447	Cotton_A_11726	0.94	29.2404	positive
Cotton_A_13822	Cotton_A_18889	0.88	17.1464	positive
Cotton_A_00476	Cotton_A_08556	0.93	3.4641	positive
Cotton_A_07447	Cotton_A_35549	0.94	29.4449	positive
Cotton_A_08556	Cotton_A_32578	0.91	8.12404	positive
Cotton_A_08556	Cotton_A_17149	0.94	3.4641	positive
Cotton_A_03377	Cotton_A_12374	0.88	7.2111	positive
Cotton_A_12374	Cotton_A_18889	0.87	9.38083	positive
Cotton_A_07447	Cotton_A_18490	0.93	9.89949	positive
Cotton_A_03377	Cotton_A_26953	0.88	17.5499	positive
Cotton_A_03171	Cotton_A_26953	0.86	20.7846	positive
Cotton_A_18889	Cotton_A_30387	0.91	5.74456	positive
Cotton_A_18889	Cotton_A_38327	0.84	15.4919	positive
Cotton_A_07447	Cotton_A_16190	0.95	19.4422	positive
Cotton_A_08556	Cotton_A_29964	0.89	16.0935	positive
Cotton_A_03171	Cotton_A_07778	0.85	11.225	positive
Cotton_A_07447	Cotton_A_18279	0.95	12.4097	positive
Cotton_A_35816	Cotton_A_38225	0.93	17.3205	positive
Cotton_A_18889	Cotton_A_18959	0.85	23.9165	positive
Cotton_A_31895	Cotton_A_35816	0.95	18.1659	positive
Cotton_A_08556	Cotton_A_11521	0.9	14.4914	positive
Cotton_A_03377	Cotton_A_05360	0.89	6.7082	positive
Cotton_A_03377	Cotton_A_29288	0.85	21.9089	positive
Cotton_A_18889	Cotton_A_29288	0.85	19.4422	positive
Cotton_A_15371	Cotton_A_18889	0.83	26.0768	positive
Cotton_A_03171	Cotton_A_25443	0.9	8.48528	positive
Cotton_A_35816	Cotton_A_38228	0.96	1.73205	positive
Cotton_A_03171	Cotton_A_33187	0.85	7.54983	positive
Cotton_A_01650	Cotton_A_03171	0.86	13.4907	positive
Cotton_A_07447	Cotton_A_20043	0.95	23.622	positive
Cotton_A_03377	Cotton_A_12800	0.89	4	positive
Cotton_A_06848	Cotton_A_07447	0.94	13.4907	positive
Cotton_A_07447	Cotton_A_21031	0.93	20.4939	positive
Cotton_A_07447	Cotton_A_32092	0.95	14.1421	positive
Cotton_A_07447	Cotton_A_20534	0.94	28.8444	positive
Cotton_A_07447	Cotton_A_08461	0.84	32.6497	positive
Cotton_A_05341	Cotton_A_07447	0.94	24.454	positive
Cotton_A_00295	Cotton_A_07447	0.95	18.8944	positive
Cotton_A_07447	Cotton_A_14287	0.95	15.9687	positive
Cotton_A_07447	Cotton_A_29605	0.94	25.923	positive
Cotton_A_07447	Cotton_A_07957	0.97	2.44949	positive
Cotton_A_07447	Cotton_A_11088	0.89	22.1359	positive
Cotton_A_07447	Cotton_A_38290	0.96	8	positive
Cotton_A_07447	Cotton_A_08404	0.95	29.8496	positive
Cotton_A_07447	Cotton_A_20282	0.95	25.4558	positive
Cotton_A_18889	Cotton_A_29283	0.87	14.2829	positive
Cotton_A_22606	Cotton_A_35816	0.92	21.3542	positive
Cotton_A_03171	Cotton_A_23557	0.88	10.9545	positive
Cotton_A_08904	Cotton_A_18889	0.92	3.16228	positive
Cotton_A_03377	Cotton_A_11064	0.92	2.44949	positive
Cotton_A_03377	Cotton_A_31365	0.89	14.8324	positive
Cotton_A_35816	Cotton_A_37478	0.96	8	positive
Cotton_A_18254	Cotton_A_18889	0.85	25.923	positive
Cotton_A_32092	Cotton_A_35816	0.94	28.4605	positive
Cotton_A_08556	Cotton_A_17093	0.92	15.2315	positive
Cotton_A_03171	Cotton_A_05112	0.78	18.4932	positive
Cotton_A_18889	Cotton_A_24404	0.9	9.59166	positive
Cotton_A_00511	Cotton_A_08556	0.93	4.58258	positive
Cotton_A_03377	Cotton_A_13561	0.85	23.8747	positive
Cotton_A_14511	Cotton_A_18889	0.84	24.7386	positive
Cotton_A_03377	Cotton_A_32495	0.8	15.3623	positive
Cotton_A_03377	Cotton_A_13982	0.88	12	positive
Cotton_A_08556	Cotton_A_21544	0.87	11.6619	positive
Cotton_A_06486	Cotton_A_08556	0.92	28.3019	positive
Cotton_A_27115	Cotton_A_35816	0.94	28.1425	positive
Cotton_A_08556	Cotton_A_23546	0.88	17.8326	positive
Cotton_A_18889	Cotton_A_32062	0.88	9.89949	positive
Cotton_A_33908	Cotton_A_35816	0.9	28.6182	positive
Cotton_A_03377	Cotton_A_16389	0.79	16.7332	positive
Cotton_A_03377	Cotton_A_07609	0.89	7.4162	positive
Cotton_A_03377	Cotton_A_27100	0.91	5.65685	positive
Cotton_A_03377	Cotton_A_16393	0.87	25.4558	positive
Cotton_A_03377	Cotton_A_21234	0.89	3.4641	positive
Cotton_A_03377	Cotton_A_09118	0.89	2.82843	positive
Cotton_A_03377	Cotton_A_19300	0.84	15.4919	positive
Cotton_A_03377	Cotton_A_14201	0.89	9.79796	positive
Cotton_A_03377	Cotton_A_03565	0.84	17.1464	positive
Cotton_A_03377	Cotton_A_37268	0.89	16.7332	positive
Cotton_A_03377	Cotton_A_04561	0.87	10.6771	positive
Cotton_A_03377	Cotton_A_04020	0.89	26.6646	positive
Cotton_A_03377	Cotton_A_39767	0.85	23.9583	positive
Cotton_A_03377	Cotton_A_16216	0.87	22.8035	positive
Cotton_A_03377	Cotton_A_18889	0.87	17.1464	positive
Cotton_A_03377	Cotton_A_12671	0.83	24.3721	positive
Cotton_A_02966	Cotton_A_03377	0.85	23.6432	positive
Cotton_A_08556	Cotton_A_31015	0.91	15.7162	positive
Cotton_A_03171	Cotton_A_07609	0.84	23.622	positive
Cotton_A_08556	Cotton_A_13605	0.93	10.7703	positive
Cotton_A_08556	Cotton_A_39481	0.9	13.4164	positive
Cotton_A_17768	Cotton_A_18889	0.86	6.78233	positive
Cotton_A_09270	Cotton_A_18889	0.8	25.6515	positive
Cotton_A_18889	Cotton_A_30823	0.84	16.0935	positive
Cotton_A_18889	Cotton_A_30234	0.84	12.3288	positive
Cotton_A_08556	Cotton_A_08661	0.85	14.6969	positive
Cotton_A_04405	Cotton_A_08556	0.92	16.8819	positive
Cotton_A_27181	Cotton_A_35816	0.95	10.7238	positive
Cotton_A_08556	Cotton_A_15722	0.86	26.1534	positive
Cotton_A_18306	Cotton_A_18889	0.87	24	positive
Cotton_A_29997	Cotton_A_35816	0.93	14.4222	positive
Cotton_A_03171	Cotton_A_09118	0.84	21.8174	positive
Cotton_A_09118	Cotton_A_18889	0.86	11.6619	positive
Cotton_A_03171	Cotton_A_14208	0.87	13.4164	positive
Cotton_A_08556	Cotton_A_31319	0.91	22.7156	positive
Cotton_A_19061	Cotton_A_35816	0.92	18.8944	positive
Cotton_A_03171	Cotton_A_19300	0.82	17.9444	positive
Cotton_A_18889	Cotton_A_19300	0.81	26.9444	positive
Cotton_A_28624	Cotton_A_35816	0.94	8.48528	positive
Cotton_A_03171	Cotton_A_36293	0.89	10.4881	positive
Cotton_A_03171	Cotton_A_14201	0.93	1.73205	positive
Cotton_A_03565	Cotton_A_18889	0.86	7.54983	positive
Cotton_A_08556	Cotton_A_11342	0.88	24.2487	positive
Cotton_A_31578	Cotton_A_35816	0.95	2.64575	positive
Cotton_A_00329	Cotton_A_35816	0.98	1	positive
Cotton_A_08556	Cotton_A_36511	0.88	29.1548	positive
Cotton_A_08556	Cotton_A_16579	0.9	16.9706	positive
Cotton_A_03171	Cotton_A_37190	0.87	23.0217	positive
Cotton_A_33239	Cotton_A_35816	0.97	1.41421	positive
Cotton_A_08556	Cotton_A_32314	0.91	3.87298	positive
Cotton_A_12733	Cotton_A_35816	0.94	7.2111	positive
Cotton_A_03171	Cotton_A_11088	0.85	20	positive
Cotton_A_33724	Cotton_A_35816	0.93	15.1987	positive
Cotton_A_03588	Cotton_A_35816	0.95	25.6125	positive
Cotton_A_08556	Cotton_A_09634	0.91	25.2982	positive
Cotton_A_08556	Cotton_A_29822	0.91	9.21954	positive
Cotton_A_08556	Cotton_A_23892	0.92	22.1359	positive
Cotton_A_08556	Cotton_A_22470	0.91	17.4929	positive
Cotton_A_08556	Cotton_A_12092	0.92	16.7332	positive
Cotton_A_01463	Cotton_A_35816	0.94	18.7083	positive
Cotton_A_03171	Cotton_A_40750	0.89	22.1811	positive
Cotton_A_10342	Cotton_A_18889	0.84	8	positive
Cotton_A_11140	Cotton_A_18889	0.97	1	positive
Cotton_A_03171	Cotton_A_17525	0.85	23	positive
Cotton_A_19655	Cotton_A_35816	0.95	7.34847	positive
Cotton_A_03171	Cotton_A_16793	0.86	16.4924	positive
Cotton_A_03171	Cotton_A_39510	0.89	12.9615	positive
Cotton_A_25640	Cotton_A_35816	0.94	12.3288	positive
Cotton_A_19911	Cotton_A_35816	0.91	18.4391	positive
Cotton_A_24859	Cotton_A_35816	0.94	15.4919	positive
Cotton_A_06179	Cotton_A_35816	0.93	21.4942	positive
Cotton_A_14274	Cotton_A_18889	0.83	27.6586	positive
Cotton_A_02966	Cotton_A_18889	0.89	4.47214	positive
Cotton_A_04455	Cotton_A_18889	0.83	29.0861	positive
Cotton_A_26953	Cotton_A_34998	0.89	10.247	positive
Cotton_A_29288	Cotton_A_34998	0.83	22.0454	positive
Cotton_A_23557	Cotton_A_34998	0.86	18.1659	positive
Cotton_A_05112	Cotton_A_34998	0.75	24	positive
Cotton_A_07609	Cotton_A_34998	0.85	12.7279	positive
Cotton_A_09118	Cotton_A_34998	0.85	12	positive
Cotton_A_19300	Cotton_A_34998	0.87	6	positive
Cotton_A_14201	Cotton_A_34998	0.9	5.2915	positive
Cotton_A_34998	Cotton_A_37268	0.93	2.82843	positive
Cotton_A_04020	Cotton_A_34998	0.88	25.6125	positive
Cotton_A_34998	Cotton_A_40750	0.88	28.1425	positive
Cotton_A_15098	Cotton_A_18490	0.93	8.48528	positive
Cotton_A_15098	Cotton_A_31895	0.96	11.225	positive
Cotton_A_00295	Cotton_A_15098	0.97	5.65685	positive
Cotton_A_15098	Cotton_A_27181	0.95	13.4164	positive
Cotton_A_03588	Cotton_A_15098	0.97	4.89898	positive
Cotton_A_17149	Cotton_A_39398	0.92	25.04	positive
Cotton_A_23557	Cotton_A_39398	0.89	22.8473	positive
Cotton_A_17093	Cotton_A_39398	0.96	1.73205	positive
Cotton_A_00511	Cotton_A_39398	0.91	23.4947	positive
Cotton_A_06486	Cotton_A_39398	0.95	8.66025	positive
Cotton_A_31015	Cotton_A_39398	0.9	29.9333	positive
Cotton_A_13605	Cotton_A_39398	0.97	1.41421	positive
Cotton_A_39398	Cotton_A_39481	0.9	16.2481	positive
Cotton_A_04405	Cotton_A_39398	0.93	17.3205	positive
Cotton_A_31319	Cotton_A_39398	0.97	1	positive
Cotton_A_29605	Cotton_A_39398	0.95	6.9282	positive
Cotton_A_36293	Cotton_A_39398	0.93	4.89898	positive
Cotton_A_36511	Cotton_A_39398	0.9	17.0294	positive
Cotton_A_32314	Cotton_A_39398	0.89	22.4499	positive
Cotton_A_09634	Cotton_A_39398	0.93	8.66025	positive
Cotton_A_29822	Cotton_A_39398	0.91	11.225	positive
Cotton_A_23892	Cotton_A_39398	0.94	12.6491	positive
Cotton_A_14201	Cotton_A_26662	0.86	16.7033	positive
Cotton_A_11088	Cotton_A_26662	0.85	14.0712	positive
Cotton_A_04020	Cotton_A_26662	0.87	21.9089	positive
Cotton_A_26662	Cotton_A_40750	0.88	13.4164	positive
Cotton_A_29283	Cotton_A_38407	0.9	9.21954	positive
Cotton_A_08904	Cotton_A_38407	0.9	12	positive
Cotton_A_24404	Cotton_A_38407	0.93	8.12404	positive
Cotton_A_11140	Cotton_A_38407	0.86	21.166	positive
Cotton_A_29964	Cotton_A_30270	0.87	4	positive
Cotton_A_00511	Cotton_A_30270	0.86	17.4929	positive
Cotton_A_21544	Cotton_A_30270	0.87	1.73205	positive
Cotton_A_23546	Cotton_A_30270	0.85	11.8322	positive
Cotton_A_15722	Cotton_A_30270	0.85	9.38083	positive
Cotton_A_22470	Cotton_A_30270	0.86	21.6564	positive
Cotton_A_19980	Cotton_A_27340	0.83	24.98	positive
Cotton_A_19980	Cotton_A_32578	0.92	2	positive
Cotton_A_19980	Cotton_A_26953	0.86	22.9565	positive
Cotton_A_07778	Cotton_A_19980	0.85	12.7279	positive
Cotton_A_19980	Cotton_A_23557	0.85	29.9833	positive
Cotton_A_19980	Cotton_A_21544	0.84	16.4317	positive
Cotton_A_07609	Cotton_A_19980	0.85	18.4391	positive
Cotton_A_13605	Cotton_A_19980	0.89	24.4949	positive
Cotton_A_19980	Cotton_A_37268	0.87	25.6905	positive
Cotton_A_19980	Cotton_A_29822	0.88	12	positive
Cotton_A_16793	Cotton_A_19980	0.85	24.2693	positive
Cotton_A_19980	Cotton_A_39510	0.89	9.74679	positive
Cotton_A_26205	Cotton_A_31895	0.97	6.32456	positive
Cotton_A_26205	Cotton_A_27115	0.94	25.6905	positive
Cotton_A_19061	Cotton_A_26205	0.9	27.5681	positive
Cotton_A_00329	Cotton_A_26205	0.93	26.4575	positive
Cotton_A_12733	Cotton_A_26205	0.91	27.4955	positive
Cotton_A_03588	Cotton_A_26205	0.96	18.9737	positive
Cotton_A_04020	Cotton_A_26205	0.96	6.32456	positive
Cotton_A_01463	Cotton_A_26205	0.99	1	positive
Cotton_A_26205	Cotton_A_40750	0.94	8.48528	positive
Cotton_A_27340	Cotton_A_29964	0.85	16.3095	positive
Cotton_A_08661	Cotton_A_27340	0.78	28.2489	positive
Cotton_A_27340	Cotton_A_29822	0.89	4.69042	positive
Cotton_A_27340	Cotton_A_39510	0.85	21.3542	positive
Cotton_A_22275	Cotton_A_37478	0.94	18.7617	positive
Cotton_A_21031	Cotton_A_22275	0.92	20.7846	positive
Cotton_A_17093	Cotton_A_22275	0.93	16.9115	positive
Cotton_A_05341	Cotton_A_22275	0.93	27.9285	positive
Cotton_A_22275	Cotton_A_29605	0.94	10.9545	positive
Cotton_A_07957	Cotton_A_22275	0.96	2.82843	positive
Cotton_A_22275	Cotton_A_38290	0.94	25.632	positive
Cotton_A_05085	Cotton_A_17093	0.91	14.6629	positive
Cotton_A_05085	Cotton_A_36293	0.92	2.44949	positive
Cotton_A_11726	Cotton_A_35549	0.95	26.3249	positive
Cotton_A_11726	Cotton_A_16190	0.98	2	positive
Cotton_A_11726	Cotton_A_18279	0.98	1.41421	positive
Cotton_A_11726	Cotton_A_20043	0.97	9.16515	positive
Cotton_A_11726	Cotton_A_14287	0.96	20.7846	positive
Cotton_A_11726	Cotton_A_29605	0.95	21.8174	positive
Cotton_A_07957	Cotton_A_11726	0.96	13.4164	positive
Cotton_A_11726	Cotton_A_38290	0.97	9.48683	positive
Cotton_A_08404	Cotton_A_11726	0.98	5.19615	positive
Cotton_A_11726	Cotton_A_20282	0.98	4	positive
Cotton_A_13822	Cotton_A_24404	0.93	9.53939	positive
Cotton_A_13822	Cotton_A_18306	0.97	1	positive
Cotton_A_03565	Cotton_A_13822	0.87	7.34847	positive
Cotton_A_00476	Cotton_A_32578	0.88	24.7184	positive
Cotton_A_00476	Cotton_A_17149	0.96	1.41421	positive
Cotton_A_00476	Cotton_A_29964	0.88	23.2164	positive
Cotton_A_00476	Cotton_A_00511	0.91	16.5227	positive
Cotton_A_00476	Cotton_A_31015	0.9	23.3238	positive
Cotton_A_00476	Cotton_A_13605	0.92	22.5832	positive
Cotton_A_00476	Cotton_A_15722	0.86	23.3666	positive
Cotton_A_00476	Cotton_A_31319	0.93	6.245	positive
Cotton_A_00476	Cotton_A_29822	0.9	14.2478	positive
Cotton_A_00476	Cotton_A_22470	0.93	8	positive
Cotton_A_00476	Cotton_A_39510	0.9	21.4942	positive
Cotton_A_16190	Cotton_A_35549	0.96	21.4942	positive
Cotton_A_18279	Cotton_A_35549	0.95	22.2261	positive
Cotton_A_20043	Cotton_A_35549	0.98	2.23607	positive
Cotton_A_35549	Cotton_A_37478	0.95	26.3818	positive
Cotton_A_32092	Cotton_A_35549	0.97	2.64575	positive
Cotton_A_00295	Cotton_A_35549	0.96	28.8444	positive
Cotton_A_14287	Cotton_A_35549	0.97	6	positive
Cotton_A_35549	Cotton_A_38290	0.97	9.38083	positive
Cotton_A_08404	Cotton_A_35549	0.97	13.2665	positive
Cotton_A_20282	Cotton_A_35549	0.96	21.3542	positive
Cotton_A_29964	Cotton_A_32578	0.86	27.9821	positive
Cotton_A_11521	Cotton_A_32578	0.87	22.6495	positive
Cotton_A_00511	Cotton_A_32578	0.91	9.89949	positive
Cotton_A_21544	Cotton_A_32578	0.85	9.79796	positive
Cotton_A_32578	Cotton_A_39481	0.88	17	positive
Cotton_A_08661	Cotton_A_32578	0.82	19.5959	positive
Cotton_A_15722	Cotton_A_32578	0.86	14.4222	positive
Cotton_A_31319	Cotton_A_32578	0.91	13.0384	positive
Cotton_A_11342	Cotton_A_32578	0.89	7.93725	positive
Cotton_A_32578	Cotton_A_36511	0.87	23.2379	positive
Cotton_A_29822	Cotton_A_32578	0.87	24.2487	positive
Cotton_A_00511	Cotton_A_17149	0.91	28.7228	positive
Cotton_A_17149	Cotton_A_31015	0.91	26.533	positive
Cotton_A_13605	Cotton_A_17149	0.95	7.48331	positive
Cotton_A_04405	Cotton_A_17149	0.95	5.2915	positive
Cotton_A_17149	Cotton_A_31319	0.94	8.3666	positive
Cotton_A_17149	Cotton_A_29605	0.93	28.2666	positive
Cotton_A_17149	Cotton_A_36511	0.9	21.8174	positive
Cotton_A_17149	Cotton_A_37190	0.9	24.9199	positive
Cotton_A_17149	Cotton_A_29822	0.9	24	positive
Cotton_A_17149	Cotton_A_23892	0.96	3.4641	positive
Cotton_A_17149	Cotton_A_22470	0.93	15.5885	positive
Cotton_A_12092	Cotton_A_17149	0.93	10.583	positive
Cotton_A_17149	Cotton_A_39510	0.92	14.4914	positive
Cotton_A_12374	Cotton_A_18959	0.93	1.41421	positive
Cotton_A_11064	Cotton_A_12374	0.88	8.83176	positive
Cotton_A_12374	Cotton_A_18254	0.9	2.82843	positive
Cotton_A_12374	Cotton_A_13561	0.83	26	positive
Cotton_A_12374	Cotton_A_16389	0.77	25.7876	positive
Cotton_A_12374	Cotton_A_30823	0.88	3.16228	positive
Cotton_A_09118	Cotton_A_12374	0.83	20.347	positive
Cotton_A_03565	Cotton_A_12374	0.83	13.8564	positive
Cotton_A_04561	Cotton_A_12374	0.84	17.3205	positive
Cotton_A_12374	Cotton_A_16216	0.87	11.5326	positive
Cotton_A_04455	Cotton_A_12374	0.86	7.4162	positive
Cotton_A_11088	Cotton_A_18490	0.9	7.74597	positive
Cotton_A_23557	Cotton_A_26953	0.9	6.9282	positive
Cotton_A_07609	Cotton_A_26953	0.89	5.83095	positive
Cotton_A_16393	Cotton_A_26953	0.94	1	positive
Cotton_A_14201	Cotton_A_26953	0.91	5.91608	positive
Cotton_A_26953	Cotton_A_37268	0.94	3	positive
Cotton_A_04020	Cotton_A_26953	0.94	6	positive
Cotton_A_26953	Cotton_A_40750	0.91	16.2481	positive
Cotton_A_29283	Cotton_A_30387	0.89	10.3923	positive
Cotton_A_08904	Cotton_A_30387	0.89	15.7162	positive
Cotton_A_30387	Cotton_A_32062	0.89	14.0712	positive
Cotton_A_11140	Cotton_A_30387	0.89	9.16515	positive
Cotton_A_29288	Cotton_A_38327	0.86	2.64575	positive
Cotton_A_12800	Cotton_A_38327	0.83	17.3205	positive
Cotton_A_13561	Cotton_A_38327	0.83	18.3303	positive
Cotton_A_19300	Cotton_A_38327	0.78	28.775	positive
Cotton_A_11140	Cotton_A_38327	0.86	4.24264	positive
Cotton_A_14274	Cotton_A_38327	0.81	29.3939	positive
Cotton_A_16190	Cotton_A_18279	0.98	3.4641	positive
Cotton_A_16190	Cotton_A_20043	0.99	1	positive
Cotton_A_06848	Cotton_A_16190	0.94	21.9089	positive
Cotton_A_16190	Cotton_A_20534	0.95	22.1359	positive
Cotton_A_14287	Cotton_A_16190	0.97	13	positive
Cotton_A_07957	Cotton_A_16190	0.97	8.94427	positive
Cotton_A_16190	Cotton_A_38290	0.98	4.58258	positive
Cotton_A_08404	Cotton_A_16190	0.99	1.73205	positive
Cotton_A_16190	Cotton_A_20282	0.97	15.8114	positive
Cotton_A_00511	Cotton_A_29964	0.95	1	positive
Cotton_A_23546	Cotton_A_29964	0.9	3.16228	positive
Cotton_A_29964	Cotton_A_39481	0.94	2	positive
Cotton_A_29964	Cotton_A_36511	0.9	4.89898	positive
Cotton_A_16579	Cotton_A_29964	0.87	28.2489	positive
Cotton_A_29964	Cotton_A_32314	0.9	2.82843	positive
Cotton_A_29822	Cotton_A_29964	0.87	25.0998	positive
Cotton_A_22470	Cotton_A_29964	0.88	22.2261	positive
Cotton_A_01650	Cotton_A_07778	0.84	12.7279	positive
Cotton_A_07778	Cotton_A_16793	0.89	1.73205	positive
Cotton_A_18279	Cotton_A_20043	0.97	8.3666	positive
Cotton_A_18279	Cotton_A_37478	0.95	26.9815	positive
Cotton_A_18279	Cotton_A_20534	0.95	15.8745	positive
Cotton_A_14287	Cotton_A_18279	0.97	7.74597	positive
Cotton_A_18279	Cotton_A_29605	0.96	6.7082	positive
Cotton_A_07957	Cotton_A_18279	0.96	11.8322	positive
Cotton_A_18279	Cotton_A_38290	0.97	8.83176	positive
Cotton_A_08404	Cotton_A_18279	0.97	12.1244	positive
Cotton_A_18279	Cotton_A_20282	0.96	20.8567	positive
Cotton_A_38225	Cotton_A_38228	0.93	7.48331	positive
Cotton_A_19061	Cotton_A_38225	0.94	1.41421	positive
Cotton_A_12733	Cotton_A_38225	0.91	18.7083	positive
Cotton_A_01463	Cotton_A_38225	0.92	23.5584	positive
Cotton_A_18959	Cotton_A_30823	0.85	10.7238	positive
Cotton_A_16216	Cotton_A_18959	0.85	29.6648	positive
Cotton_A_02966	Cotton_A_18959	0.86	11.225	positive
Cotton_A_04455	Cotton_A_18959	0.86	9.48683	positive
Cotton_A_31895	Cotton_A_37478	0.97	6.48074	positive
Cotton_A_27115	Cotton_A_31895	0.97	5.65685	positive
Cotton_A_00295	Cotton_A_31895	0.97	17.8885	positive
Cotton_A_27181	Cotton_A_31895	0.95	24.4949	positive
Cotton_A_00329	Cotton_A_31895	0.96	10.583	positive
Cotton_A_03588	Cotton_A_31895	0.99	1	positive
Cotton_A_04020	Cotton_A_31895	0.94	27.7489	positive
Cotton_A_01463	Cotton_A_31895	0.97	7.2111	positive
Cotton_A_31895	Cotton_A_40750	0.95	12.1244	positive
Cotton_A_19655	Cotton_A_31895	0.94	23.8118	positive
Cotton_A_12092	Cotton_A_31895	0.93	26.3818	positive
Cotton_A_11521	Cotton_A_17093	0.93	5.65685	positive
Cotton_A_00511	Cotton_A_11521	0.89	20.6155	positive
Cotton_A_11521	Cotton_A_23546	0.85	29.9333	positive
Cotton_A_11521	Cotton_A_31015	0.95	1	positive
Cotton_A_04405	Cotton_A_11521	0.91	21.3542	positive
Cotton_A_11521	Cotton_A_31319	0.92	8.30662	positive
Cotton_A_11342	Cotton_A_11521	0.92	2	positive
Cotton_A_05360	Cotton_A_29288	0.85	15.4919	positive
Cotton_A_05360	Cotton_A_13982	0.87	12.49	positive
Cotton_A_03565	Cotton_A_05360	0.82	28.7228	positive
Cotton_A_04561	Cotton_A_05360	0.9	1.73205	positive
Cotton_A_05360	Cotton_A_39767	0.86	11.225	positive
Cotton_A_05360	Cotton_A_12671	0.82	26.3249	positive
Cotton_A_13561	Cotton_A_29288	0.86	9	positive
Cotton_A_19300	Cotton_A_29288	0.8	29.9333	positive
Cotton_A_11140	Cotton_A_29288	0.86	8.94427	positive
Cotton_A_29288	Cotton_A_39767	0.85	12	positive
Cotton_A_01650	Cotton_A_15371	0.89	2.82843	positive
Cotton_A_14511	Cotton_A_15371	0.84	10.9545	positive
Cotton_A_15371	Cotton_A_32062	0.83	28.2843	positive
Cotton_A_11140	Cotton_A_15371	0.83	17.7482	positive
Cotton_A_15371	Cotton_A_17525	0.87	5.47723	positive
Cotton_A_14511	Cotton_A_25443	0.85	29.4618	positive
Cotton_A_14208	Cotton_A_25443	0.88	12.1655	positive
Cotton_A_25443	Cotton_A_36293	0.89	21.8174	positive
Cotton_A_14201	Cotton_A_25443	0.88	27.9106	positive
Cotton_A_25443	Cotton_A_40750	0.92	16.5227	positive
Cotton_A_17525	Cotton_A_25443	0.9	8.30662	positive
Cotton_A_25443	Cotton_A_39510	0.92	9.48683	positive
Cotton_A_22606	Cotton_A_38228	0.92	9.48683	positive
Cotton_A_37478	Cotton_A_38228	0.93	28.6356	positive
Cotton_A_27181	Cotton_A_38228	0.93	16.1245	positive
Cotton_A_28624	Cotton_A_38228	0.92	15.4919	positive
Cotton_A_00329	Cotton_A_38228	0.92	27.4226	positive
Cotton_A_33239	Cotton_A_38228	0.93	9.38083	positive
Cotton_A_12733	Cotton_A_38228	0.93	7.93725	positive
Cotton_A_25640	Cotton_A_38228	0.96	1.41421	positive
Cotton_A_19911	Cotton_A_38228	0.9	16.7332	positive
Cotton_A_24859	Cotton_A_38228	0.96	1.73205	positive
Cotton_A_14201	Cotton_A_33187	0.84	16.8523	positive
Cotton_A_17525	Cotton_A_33187	0.84	12.7279	positive
Cotton_A_01650	Cotton_A_14511	0.83	24.6779	positive
Cotton_A_01650	Cotton_A_32495	0.77	27.6225	positive
Cotton_A_01650	Cotton_A_14201	0.86	18.9737	positive
Cotton_A_01650	Cotton_A_17525	0.93	1	positive
Cotton_A_01650	Cotton_A_16793	0.87	8.48528	positive
Cotton_A_06848	Cotton_A_20043	0.94	23.7487	positive
Cotton_A_20043	Cotton_A_20534	0.95	28.775	positive
Cotton_A_14287	Cotton_A_20043	0.98	3.4641	positive
Cotton_A_07957	Cotton_A_20043	0.96	22.9783	positive
Cotton_A_20043	Cotton_A_38290	0.98	5.47723	positive
Cotton_A_08404	Cotton_A_20043	0.99	2.44949	positive
Cotton_A_20043	Cotton_A_20282	0.97	17.6635	positive
Cotton_A_11064	Cotton_A_12800	0.85	27.9285	positive
Cotton_A_12800	Cotton_A_14511	0.84	17.6635	positive
Cotton_A_12800	Cotton_A_27100	0.87	15.8114	positive
Cotton_A_09270	Cotton_A_12800	0.8	17.6635	positive
Cotton_A_02966	Cotton_A_12800	0.85	14.0712	positive
Cotton_A_24404	Cotton_A_29283	0.86	26.8701	positive
Cotton_A_11140	Cotton_A_29283	0.88	8.06226	positive
Cotton_A_22606	Cotton_A_29997	0.95	1	positive
Cotton_A_19061	Cotton_A_22606	0.89	17.1464	positive
Cotton_A_22606	Cotton_A_31578	0.89	20.1246	positive
Cotton_A_22606	Cotton_A_33239	0.92	11.225	positive
Cotton_A_13605	Cotton_A_23557	0.91	10.6771	positive
Cotton_A_16393	Cotton_A_23557	0.91	2.82843	positive
Cotton_A_23557	Cotton_A_37268	0.88	24.454	positive
Cotton_A_23557	Cotton_A_33724	0.9	13.2288	positive
Cotton_A_04020	Cotton_A_23557	0.89	22.7596	positive
Cotton_A_08904	Cotton_A_14511	0.86	7.07107	positive
Cotton_A_08904	Cotton_A_32062	0.95	1	positive
Cotton_A_08904	Cotton_A_17768	0.84	19.2614	positive
Cotton_A_08904	Cotton_A_11140	0.93	2	positive
Cotton_A_06848	Cotton_A_38290	0.94	26.6833	positive
Cotton_A_11064	Cotton_A_31365	0.91	6.7082	positive
Cotton_A_11064	Cotton_A_13982	0.9	7.34847	positive
Cotton_A_11064	Cotton_A_27100	0.95	1.73205	positive
Cotton_A_11064	Cotton_A_21234	0.91	2.82843	positive
Cotton_A_04561	Cotton_A_11064	0.85	27.0555	positive
Cotton_A_13561	Cotton_A_31365	0.88	13.4164	positive
Cotton_A_27100	Cotton_A_31365	0.9	15.906	positive
Cotton_A_30823	Cotton_A_31365	0.84	26.0384	positive
Cotton_A_21234	Cotton_A_31365	0.87	16.5227	positive
Cotton_A_14274	Cotton_A_31365	0.86	22.8035	positive
Cotton_A_16216	Cotton_A_31365	0.91	3.4641	positive
Cotton_A_32092	Cotton_A_37478	0.96	9.48683	positive
Cotton_A_27115	Cotton_A_37478	0.95	26.5141	positive
Cotton_A_13605	Cotton_A_37478	0.95	18.735	positive
Cotton_A_00295	Cotton_A_37478	0.96	24.6577	positive
Cotton_A_27181	Cotton_A_37478	0.96	7.34847	positive
Cotton_A_29605	Cotton_A_37478	0.96	9.38083	positive
Cotton_A_28624	Cotton_A_37478	0.93	27.9285	positive
Cotton_A_00329	Cotton_A_37478	0.97	2.82843	positive
Cotton_A_33239	Cotton_A_37478	0.94	16.2788	positive
Cotton_A_03588	Cotton_A_37478	0.97	10.247	positive
Cotton_A_25640	Cotton_A_37478	0.96	6	positive
Cotton_A_07957	Cotton_A_21031	0.93	25.1992	positive
Cotton_A_21031	Cotton_A_23892	0.92	29.189	positive
Cotton_A_04455	Cotton_A_18254	0.86	11.5326	positive
Cotton_A_00295	Cotton_A_32092	0.96	15.2971	positive
Cotton_A_07957	Cotton_A_32092	0.95	25.7488	positive
Cotton_A_00329	Cotton_A_32092	0.95	14.0712	positive
Cotton_A_32092	Cotton_A_33239	0.94	16.2481	positive
Cotton_A_17093	Cotton_A_31015	0.92	17.7482	positive
Cotton_A_13605	Cotton_A_17093	0.94	14.8324	positive
Cotton_A_04405	Cotton_A_17093	0.94	13.2288	positive
Cotton_A_17093	Cotton_A_31319	0.96	2.82843	positive
Cotton_A_17093	Cotton_A_29605	0.96	5.19615	positive
Cotton_A_17093	Cotton_A_36293	0.95	2.23607	positive
Cotton_A_11342	Cotton_A_17093	0.92	7.34847	positive
Cotton_A_17093	Cotton_A_23892	0.93	29.5635	positive
Cotton_A_05112	Cotton_A_19300	0.75	14.1421	positive
Cotton_A_18306	Cotton_A_24404	0.97	1.41421	positive
Cotton_A_04455	Cotton_A_24404	0.86	18.3303	positive
Cotton_A_00511	Cotton_A_23546	0.91	4.12311	positive
Cotton_A_00511	Cotton_A_31015	0.92	10.4881	positive
Cotton_A_00511	Cotton_A_39481	0.95	2	positive
Cotton_A_00511	Cotton_A_15722	0.86	22.3607	positive
Cotton_A_00511	Cotton_A_31319	0.92	13.8564	positive
Cotton_A_00511	Cotton_A_36511	0.95	1.41421	positive
Cotton_A_00511	Cotton_A_32314	0.9	8.94427	positive
Cotton_A_00511	Cotton_A_29822	0.9	14.4914	positive
Cotton_A_00511	Cotton_A_22470	0.95	3.4641	positive
Cotton_A_13561	Cotton_A_13982	0.84	28.5657	positive
Cotton_A_13561	Cotton_A_14274	0.89	3	positive
Cotton_A_12671	Cotton_A_13561	0.84	12.2474	positive
Cotton_A_07957	Cotton_A_20534	0.95	23.2379	positive
Cotton_A_14511	Cotton_A_32062	0.84	25.2982	positive
Cotton_A_11140	Cotton_A_14511	0.82	28.3901	positive
Cotton_A_14511	Cotton_A_17525	0.86	5.74456	positive
Cotton_A_14274	Cotton_A_14511	0.82	26.9815	positive
Cotton_A_07609	Cotton_A_32495	0.77	25.9808	positive
Cotton_A_21234	Cotton_A_32495	0.81	7.07107	positive
Cotton_A_09118	Cotton_A_32495	0.77	19.1833	positive
Cotton_A_19300	Cotton_A_32495	0.77	11.1803	positive
Cotton_A_13982	Cotton_A_21234	0.88	5.91608	positive
Cotton_A_09118	Cotton_A_13982	0.85	15.2971	positive
Cotton_A_04561	Cotton_A_13982	0.89	3.16228	positive
Cotton_A_02966	Cotton_A_13982	0.84	25.7876	positive
Cotton_A_15722	Cotton_A_21544	0.82	21.4942	positive
Cotton_A_11342	Cotton_A_21544	0.84	23.8328	positive
Cotton_A_06486	Cotton_A_13605	0.96	8.83176	positive
Cotton_A_06486	Cotton_A_16579	0.92	16.2481	positive
Cotton_A_06486	Cotton_A_32314	0.9	26.1725	positive
Cotton_A_06486	Cotton_A_09634	0.96	2.82843	positive
Cotton_A_06486	Cotton_A_23892	0.95	18.7617	positive
Cotton_A_27115	Cotton_A_27181	0.95	16.9115	positive
Cotton_A_00329	Cotton_A_27115	0.94	29.7993	positive
Cotton_A_03588	Cotton_A_27115	0.97	11.4018	positive
Cotton_A_01463	Cotton_A_27115	0.97	7	positive
Cotton_A_19655	Cotton_A_27115	0.97	4	positive
Cotton_A_06179	Cotton_A_27115	0.93	24.8998	positive
Cotton_A_23546	Cotton_A_31015	0.87	24.3721	positive
Cotton_A_23546	Cotton_A_39481	0.86	20.199	positive
Cotton_A_15722	Cotton_A_23546	0.85	14.4222	positive
Cotton_A_23546	Cotton_A_36511	0.85	29.7321	positive
Cotton_A_23546	Cotton_A_32314	0.89	4.89898	positive
Cotton_A_09634	Cotton_A_23546	0.88	24.8998	positive
Cotton_A_22470	Cotton_A_23546	0.89	10.7703	positive
Cotton_A_11140	Cotton_A_32062	0.88	8.83176	positive
Cotton_A_08461	Cotton_A_29605	0.84	21.9545	positive
Cotton_A_33239	Cotton_A_33908	0.92	6.9282	positive
Cotton_A_04405	Cotton_A_31015	0.93	13.1149	positive
Cotton_A_15722	Cotton_A_31015	0.88	10.247	positive
Cotton_A_31015	Cotton_A_31319	0.93	10.0995	positive
Cotton_A_11342	Cotton_A_31015	0.89	16	positive
Cotton_A_31015	Cotton_A_36511	0.9	13.0767	positive
Cotton_A_22470	Cotton_A_31015	0.94	4.58258	positive
Cotton_A_04455	Cotton_A_16389	0.82	5.2915	positive
Cotton_A_07609	Cotton_A_16393	0.85	26.7395	positive
Cotton_A_07609	Cotton_A_21234	0.84	18.7083	positive
Cotton_A_07609	Cotton_A_09118	0.89	1.73205	positive
Cotton_A_07609	Cotton_A_19300	0.89	2.44949	positive
Cotton_A_07609	Cotton_A_14201	0.89	8.24621	positive
Cotton_A_03565	Cotton_A_07609	0.84	10.583	positive
Cotton_A_07609	Cotton_A_37268	0.88	17.8326	positive
Cotton_A_13605	Cotton_A_31319	0.97	2.44949	positive
Cotton_A_13605	Cotton_A_29605	0.97	3.4641	positive
Cotton_A_13605	Cotton_A_33724	0.94	8.24621	positive
Cotton_A_09634	Cotton_A_13605	0.93	19.799	positive
Cotton_A_13605	Cotton_A_29822	0.92	8.7178	positive
Cotton_A_13605	Cotton_A_23892	0.95	13.4164	positive
Cotton_A_12092	Cotton_A_13605	0.94	6.63325	positive
Cotton_A_31319	Cotton_A_39481	0.9	18.4391	positive
Cotton_A_36511	Cotton_A_39481	0.89	13.8564	positive
Cotton_A_32314	Cotton_A_39481	0.89	10.8167	positive
Cotton_A_29822	Cotton_A_39481	0.89	15.4272	positive
Cotton_A_09270	Cotton_A_14274	0.85	3.16228	positive
Cotton_A_09270	Cotton_A_12671	0.79	21.9089	positive
Cotton_A_02966	Cotton_A_09270	0.8	21.9089	positive
Cotton_A_11140	Cotton_A_30823	0.81	25.6515	positive
Cotton_A_16216	Cotton_A_30823	0.9	2.23607	positive
Cotton_A_11140	Cotton_A_30234	0.83	12	positive
Cotton_A_04405	Cotton_A_05341	0.94	24	positive
Cotton_A_05341	Cotton_A_14287	0.96	13.8564	positive
Cotton_A_05341	Cotton_A_07957	0.96	8.3666	positive
Cotton_A_05341	Cotton_A_38290	0.98	1.41421	positive
Cotton_A_05341	Cotton_A_20282	0.96	16.9706	positive
Cotton_A_08661	Cotton_A_16793	0.81	22.6495	positive
Cotton_A_00295	Cotton_A_03588	0.98	9.59166	positive
Cotton_A_00295	Cotton_A_08404	0.97	28.4605	positive
Cotton_A_04405	Cotton_A_31319	0.93	19.5959	positive
Cotton_A_04405	Cotton_A_11342	0.9	24.1868	positive
Cotton_A_04405	Cotton_A_29822	0.92	7.48331	positive
Cotton_A_04405	Cotton_A_23892	0.95	9.79796	positive
Cotton_A_04405	Cotton_A_20282	0.95	25.6905	positive
Cotton_A_00329	Cotton_A_27181	0.95	11.6619	positive
Cotton_A_03588	Cotton_A_27181	0.96	13.6015	positive
Cotton_A_25640	Cotton_A_27181	0.95	8.66025	positive
Cotton_A_19911	Cotton_A_27181	0.92	10.6301	positive
Cotton_A_15722	Cotton_A_29822	0.85	28.9828	positive
Cotton_A_15722	Cotton_A_22470	0.87	16.4317	positive
Cotton_A_04455	Cotton_A_18306	0.87	11.4018	positive
Cotton_A_16393	Cotton_A_19061	0.89	17.4356	positive
Cotton_A_16393	Cotton_A_37268	0.91	10.9087	positive
Cotton_A_04020	Cotton_A_16393	0.93	6.48074	positive
Cotton_A_16393	Cotton_A_39767	0.86	16.6132	positive
Cotton_A_09118	Cotton_A_21234	0.84	18.3303	positive
Cotton_A_21234	Cotton_A_37268	0.86	27.7489	positive
Cotton_A_02966	Cotton_A_21234	0.84	20.1246	positive
Cotton_A_14287	Cotton_A_38290	0.99	1	positive
Cotton_A_08404	Cotton_A_14287	0.98	6.9282	positive
Cotton_A_14287	Cotton_A_20282	0.98	4.89898	positive
Cotton_A_29997	Cotton_A_31578	0.91	10.0995	positive
Cotton_A_29997	Cotton_A_33239	0.93	6.7082	positive
Cotton_A_24859	Cotton_A_29997	0.92	20.1494	positive
Cotton_A_09118	Cotton_A_19300	0.89	1	positive
Cotton_A_03565	Cotton_A_09118	0.82	20.1494	positive
Cotton_A_04561	Cotton_A_09118	0.87	4.24264	positive
Cotton_A_09118	Cotton_A_11140	0.83	21.4476	positive
Cotton_A_02966	Cotton_A_09118	0.89	2.82843	positive
Cotton_A_29605	Cotton_A_31319	0.97	1.41421	positive
Cotton_A_31319	Cotton_A_36293	0.9	22.0454	positive
Cotton_A_11342	Cotton_A_31319	0.91	10.9545	positive
Cotton_A_31319	Cotton_A_36511	0.9	18.4932	positive
Cotton_A_29822	Cotton_A_31319	0.91	12.9615	positive
Cotton_A_23892	Cotton_A_31319	0.94	15.5563	positive
Cotton_A_19061	Cotton_A_28624	0.93	5.65685	positive
Cotton_A_19061	Cotton_A_31578	0.92	5	positive
Cotton_A_12733	Cotton_A_19061	0.95	1	positive
Cotton_A_04020	Cotton_A_19061	0.92	13.8564	positive
Cotton_A_03565	Cotton_A_19300	0.85	4	positive
Cotton_A_11140	Cotton_A_19300	0.81	19.2354	positive
Cotton_A_07957	Cotton_A_29605	0.95	25.807	positive
Cotton_A_23892	Cotton_A_29605	0.95	15.4919	positive
Cotton_A_12092	Cotton_A_29605	0.93	17.7482	positive
Cotton_A_20282	Cotton_A_29605	0.96	16.4317	positive
Cotton_A_12733	Cotton_A_28624	0.91	20.7123	positive
Cotton_A_07957	Cotton_A_38290	0.98	2	positive
Cotton_A_14201	Cotton_A_37268	0.94	2	positive
Cotton_A_14201	Cotton_A_37190	0.89	15.7162	positive
Cotton_A_11088	Cotton_A_14201	0.85	28	positive
Cotton_A_04020	Cotton_A_14201	0.9	22.6495	positive
Cotton_A_14201	Cotton_A_40750	0.93	4.47214	positive
Cotton_A_03565	Cotton_A_11140	0.81	28.2489	positive
Cotton_A_03565	Cotton_A_39767	0.83	16.2481	positive
Cotton_A_04020	Cotton_A_37268	0.94	7.74597	positive
Cotton_A_37268	Cotton_A_40750	0.93	9.94987	positive
Cotton_A_00329	Cotton_A_31578	0.94	6.16441	positive
Cotton_A_31578	Cotton_A_33239	0.94	3.4641	positive
Cotton_A_12733	Cotton_A_31578	0.9	19.8997	positive
Cotton_A_11088	Cotton_A_31578	0.86	23.3238	positive
Cotton_A_31578	Cotton_A_33724	0.9	25.04	positive
Cotton_A_01463	Cotton_A_31578	0.91	20.7846	positive
Cotton_A_19655	Cotton_A_31578	0.93	7.48331	positive
Cotton_A_00329	Cotton_A_37190	0.91	22.9783	positive
Cotton_A_00329	Cotton_A_33239	0.96	3.16228	positive
Cotton_A_00329	Cotton_A_12733	0.92	21.4243	positive
Cotton_A_00329	Cotton_A_33724	0.96	2.44949	positive
Cotton_A_00329	Cotton_A_03588	0.95	26.2679	positive
Cotton_A_00329	Cotton_A_01463	0.94	21	positive
Cotton_A_00329	Cotton_A_40750	0.93	20.3961	positive
Cotton_A_00329	Cotton_A_19655	0.94	13.5647	positive
Cotton_A_00329	Cotton_A_25640	0.93	24.3926	positive
Cotton_A_00329	Cotton_A_19911	0.92	11.1355	positive
Cotton_A_23892	Cotton_A_36511	0.91	20.4939	positive
Cotton_A_22470	Cotton_A_36511	0.94	3.4641	positive
Cotton_A_16579	Cotton_A_32314	0.86	27.9285	positive
Cotton_A_33724	Cotton_A_37190	0.93	3.4641	positive
Cotton_A_16793	Cotton_A_37190	0.87	22.3607	positive
Cotton_A_37190	Cotton_A_39510	0.93	2.44949	positive
Cotton_A_33239	Cotton_A_33724	0.91	24.8193	positive
Cotton_A_19655	Cotton_A_33239	0.93	14.9666	positive
Cotton_A_25640	Cotton_A_33239	0.92	26.2679	positive
Cotton_A_24859	Cotton_A_33239	0.92	29.5804	positive
Cotton_A_09634	Cotton_A_32314	0.89	24.6779	positive
Cotton_A_04020	Cotton_A_12733	0.91	25.6905	positive
Cotton_A_12733	Cotton_A_19655	0.91	29.5635	positive
Cotton_A_12733	Cotton_A_25640	0.92	17.6068	positive
Cotton_A_19911	Cotton_A_33724	0.89	26.533	positive
Cotton_A_33724	Cotton_A_39510	0.9	26.0768	positive
Cotton_A_06179	Cotton_A_33724	0.93	7.93725	positive
Cotton_A_03588	Cotton_A_40750	0.94	25.3377	positive
Cotton_A_01463	Cotton_A_04020	0.97	3.16228	positive
Cotton_A_04020	Cotton_A_40750	0.94	10.247	positive
Cotton_A_04020	Cotton_A_19655	0.95	5.47723	positive
Cotton_A_01463	Cotton_A_40750	0.93	21.166	positive
Cotton_A_01463	Cotton_A_19655	0.96	5.47723	positive
Cotton_A_10342	Cotton_A_11140	0.8	16.7332	positive
Cotton_A_08404	Cotton_A_38290	0.98	8.12404	positive
Cotton_A_20282	Cotton_A_38290	0.98	7.48331	positive
Cotton_A_11140	Cotton_A_14274	0.82	28.1425	positive
Cotton_A_02966	Cotton_A_11140	0.9	1.73205	positive
Cotton_A_16793	Cotton_A_39510	0.89	10.7238	positive
Cotton_A_12671	Cotton_A_39767	0.82	23.3666	positive
Cotton_A_19911	Cotton_A_25640	0.9	28.2843	positive
Cotton_A_24859	Cotton_A_25640	0.95	4	positive
Cotton_A_12671	Cotton_A_14274	0.81	26.7208	positive
Cotton_A_02966	Cotton_A_14274	0.83	20.7846	positive
Cotton_A_08404	Cotton_A_20282	0.99	2.44949	positive

## Sheet: Sheet1
Cotton_A_03377
Cotton_A_34998
Cotton_A_03171
Cotton_A_15098
Cotton_A_35816
Cotton_A_08556
Cotton_A_39398
Cotton_A_26662
Cotton_A_18889
Cotton_A_38407
Cotton_A_30270
Cotton_A_19980
Cotton_A_26205
Cotton_A_27340
Cotton_A_07447
Cotton_A_22275
Cotton_A_05085
Cotton_A_11726
Cotton_A_13822
Cotton_A_00476
Cotton_A_35549
Cotton_A_32578
Cotton_A_17149
Cotton_A_12374
Cotton_A_18490
Cotton_A_26953
Cotton_A_30387
Cotton_A_38327
Cotton_A_16190
Cotton_A_29964
Cotton_A_07778
Cotton_A_18279
Cotton_A_38225
Cotton_A_18959
Cotton_A_31895
Cotton_A_11521
Cotton_A_05360
Cotton_A_29288
Cotton_A_15371
Cotton_A_25443
Cotton_A_38228
Cotton_A_33187
Cotton_A_01650
Cotton_A_20043
Cotton_A_12800
Cotton_A_06848
Cotton_A_21031
Cotton_A_32092
Cotton_A_20534
Cotton_A_08461
Cotton_A_05341
Cotton_A_00295
Cotton_A_14287
Cotton_A_29605
Cotton_A_07957
Cotton_A_11088
Cotton_A_38290
Cotton_A_08404
Cotton_A_20282
Cotton_A_29283
Cotton_A_22606
Cotton_A_23557
Cotton_A_08904
Cotton_A_11064
Cotton_A_31365
Cotton_A_37478
Cotton_A_18254
Cotton_A_17093
Cotton_A_05112
Cotton_A_24404
Cotton_A_00511
Cotton_A_13561
Cotton_A_14511
Cotton_A_32495
Cotton_A_13982
Cotton_A_21544
Cotton_A_06486
Cotton_A_27115
Cotton_A_23546
Cotton_A_32062
Cotton_A_33908
Cotton_A_16389
Cotton_A_07609
Cotton_A_27100
Cotton_A_16393
Cotton_A_21234
Cotton_A_09118
Cotton_A_19300
Cotton_A_14201
Cotton_A_03565
Cotton_A_37268
Cotton_A_04561
Cotton_A_04020
Cotton_A_39767
Cotton_A_16216
Cotton_A_12671
Cotton_A_02966
Cotton_A_31015
Cotton_A_13605
Cotton_A_39481
Cotton_A_17768
Cotton_A_09270
Cotton_A_30823
Cotton_A_30234
Cotton_A_08661
Cotton_A_04405
Cotton_A_27181
Cotton_A_15722
Cotton_A_18306
Cotton_A_29997
Cotton_A_14208
Cotton_A_31319
Cotton_A_19061
Cotton_A_28624
Cotton_A_36293
Cotton_A_11342
Cotton_A_31578
Cotton_A_00329
Cotton_A_36511
Cotton_A_16579
Cotton_A_37190
Cotton_A_33239
Cotton_A_32314
Cotton_A_12733
Cotton_A_33724
Cotton_A_03588
Cotton_A_09634
Cotton_A_29822
Cotton_A_23892
Cotton_A_22470
Cotton_A_12092
Cotton_A_01463
Cotton_A_40750
Cotton_A_10342
Cotton_A_11140
Cotton_A_17525
Cotton_A_19655
Cotton_A_16793
Cotton_A_39510
Cotton_A_25640
Cotton_A_19911
Cotton_A_24859
Cotton_A_06179
Cotton_A_14274
Cotton_A_04455

## Sheet: annotation
Gossypium arboreum	Arabidopsis thaliana ID	other name	GO annotation	annotation	function	reference
Cotton_A_00295	AT2G38320	TBL34	single-organism process;cell wall biogenesis;cell wall organization or biogenesis;single-organism cellular process;polysaccharide metabolic process;metabolic process;primary metabolic process;cellular component organization or biogenesis;single-organism biosynthetic process;cellular macromolecule biosynthetic process;macromolecule metabolic process;cellular macromolecule metabolic process;single-…	Encodes a member of the TBL (TRICHOME BIREFRINGENCE-LIKE) gene family containing a plant-specific DUF231 (domain of unknown function) domain. TBL gene family has 46 members, two of which (TBR/AT5G06700 and TBL3/AT5G01360) have been shown to be involved in the synthesis and deposition of secondary wall cellulose, presumably by influencing the esterification state of pectic polymers. A nomenclature…		Youxi Yuan et al.,2016
Cotton_A_00329	AT2G38120	AUX1	response to stimulus;single-organism process;tissue development;plant organ development;anatomical structure development;signal transduction;single organism signaling;signaling;developmental process;system development;animal organ development;cellular response to hormone stimulus;single-organism transport;cellular response to endogenous stimulus;cellular response to organic substance;cellular res…	Encodes LAX2 (LIKE AUXIN RESISTANT), a member of the AUX1 LAX family of auxin influx carriers. Required for the establishment of embryonic root cell organization.	leaf development	Takanori Wakatake et al., 2020
Cotton_A_00476	AT2G36910	ABCB1	response to stimulus;single-organism process;plant organ development;anatomical structure development;signal transduction;single organism signaling;signaling;developmental process;system development;phyllome development;cellular response to hormone stimulus;single-organism transport;cellular response to endogenous stimulus;cellular response to organic substance;cellular response to chemical stimu…	Belongs to the family of ATP-binding cassette (ABC) transporters. Also known as AtMDR1.Possibly regulates auxin-dependent responses by influencing basipetal auxin transport in the root. Exerts nonredundant, partially overlapping functions with the ABC transporter encoded by AT3G28860. PGP1 mediates cellular efflux of IAA and interacts with PIN genes that may confer an accelerated vectoral compone…	Auxin transport	Yanhua Ge et al., 2016
Cotton_A_00511	AT2G36570	PXC1	enzyme linked receptor protein signaling pathway;transmembrane receptor protein tyrosine kinase signaling pathway;cell surface receptor signaling pathway;protein phosphorylation;phosphorylation;response to stimulus;single-organism process;signal transduction;single organism signaling;signaling;phosphate-containing compound metabolic process;phosphorus metabolic process;protein modification proces…	Leucine-rich repeat protein kinase family protein	seed development	Sunghan Kim et al., 2008
Cotton_A_01463	AT1G73220	OCT1	single-organism process;plant organ development;anatomical structure development;developmental process;system development;phyllome development;animal organ development;single-multicellular organism process;multicellular organismal process;leaf development;single-organism developmental process;multicellular organism development;shoot system development;nitrogen compound transport;transport;establi…	organic cation/carnitine transporter 2	stress response	Allison K Strohm et al., 2014
Cotton_A_01650	AT3G50780		protein modification process;cellular protein modification process;macromolecule modification;protein metabolic process;metabolic process;primary metabolic process;macromolecule metabolic process;cellular protein metabolic process;cellular macromolecule metabolic process;cellular process;organic substance metabolic process;cellular metabolic process;intracellular membrane-bounded organelle;intrac…	BTB/POZ domain protein
Cotton_A_02966	AT3G07010		polysaccharide metabolic process;metabolic process;primary metabolic process;macromolecule metabolic process;organic substance catabolic process;organic substance metabolic process;catabolic process;macromolecule catabolic process;carbohydrate metabolic process;catalytic activity;binding;cation binding;ion binding;metal ion binding;extracellular region;	Pectin lyase-like superfamily protein
Cotton_A_03171	AT2G05920	SBT1.8	protein metabolic process;proteolysis;metabolic process;primary metabolic process;macromolecule metabolic process;organic substance metabolic process;serine-type endopeptidase activity;serine-type peptidase activity;serine hydrolase activity;catalytic activity;endopeptidase activity;peptidase activity, acting on L-amino acid peptides;peptidase activity;hydrolase activity;cell periphery;external e…	Encodes a protein with similarity to serine protease, subtilisin, that is upregulated during senescence and expressed in the arial portions of the plant.Loss of function mutations have increased branch number but normal silique length and seed set and therefore have increased fertility.	drought stress response
Cotton_A_03377	AT1G01900	SBT1.1	protein metabolic process;proteolysis;metabolic process;primary metabolic process;macromolecule metabolic process;organic substance metabolic process;serine-type endopeptidase activity;serine-type peptidase activity;serine hydrolase activity;catalytic activity;endopeptidase activity;peptidase activity, acting on L-amino acid peptides;peptidase activity;hydrolase activity;cell periphery;external e…	Encodes AtSBT1.1, a subtilisin-like serine protease. Cleaves the phytosulfokine AtPSK4, a growth promoting peptide.	root development	Renu Srivastava et al., 2008
Cotton_A_03565	AT4G25420	GA20OX1	response to stimulus;single-organism process;plant organ development;anatomical structure development;signal transduction;single organism signaling;signaling;developmental process;system development;phyllome development;cellular response to hormone stimulus;cellular response to endogenous stimulus;cellular response to organic substance;cellular response to chemical stimulus;single-multicellular o…	Encodes gibberellin 20-oxidase that is involved in the later steps of the gibberellin biosynthetic pathway. Regulated by a circadian clock. Weak expression response to far red light.	drought stress response	Hong-Ie Chen et al., 2019
Cotton_A_03588	AT5G61480	PXY	protein phosphorylation;phosphorylation;single-organism process;tissue development;shoot system morphogenesis;anatomical structure development;developmental process;phosphate-containing compound metabolic process;phosphorus metabolic process;system development;protein modification process;cellular protein modification process;single-multicellular organism process;multicellular organismal process;…	Encodes PXY, a receptor-like kinase essential for maintaining polarity during plant vascular-tissue development.	Cell proliferation	Zhijie Li et al., 2017
Cotton_A_04020	AT1G71380	CEL3	cell wall organization or biogenesis;cell wall organization;external encapsulating structure organization;polysaccharide metabolic process;metabolic process;primary metabolic process;cellular component organization or biogenesis;macromolecule metabolic process;organic substance catabolic process;cellular macromolecule metabolic process;cellular component organization;cellular catabolic process;ce…	cellulase 3	root development	Daniel R Lewis et al., 2013
Cotton_A_04405	AT1G14920	RGA2	response to stimulus;single-organism process;anatomical structure development;signal transduction;single organism signaling;signaling;developmental process;system development;cellular response to hormone stimulus;single-organism transport;cellular response to endogenous stimulus;cellular response to organic substance;cellular response to chemical stimulus;single-organism localization;single-multi…	Encodes a DELLA protein, a member of the GRAS superfamily of putative transcription factors. DELLA proteins restrain the cell proliferation and expansion that drives plant growth. Negative regulator of the response to GA in controlling seed germination. GA triggers the degradation of RGL2 protein in a process blocked by both proteasome inhibitors and serine/threonine phosphatase inhibitors. The p…	flower development	Saima Arain et al., 2020
Cotton_A_04455	AT2G14830	ISTL10	transport;establishment of localization;localization;organic substance transport;binding;transition metal ion binding;cation binding;ion binding;zinc ion binding;metal ion binding;intracellular membrane-bounded organelle;intracellular part;cell part;membrane-bounded organelle;nucleus;intracellular organelle;cell;organelle;intracellular;cytoplasm;	Ist1p
Cotton_A_04561	AT5G63800	MUM2	single-organism process;anatomical structure development;developmental process;system development;single-multicellular organism process;plant-type cell wall organization or biogenesis;multicellular organismal process;single-organism developmental process;multicellular organism development;post-embryonic development;seed development;single organism reproductive process;cell wall organization or bi…	Involved in mucilage formation. Mutants form columella and outer cell wall architecture of the mucilage cells resembles wild-type. However, mum2 seeds completely lack seed coat mucilage. This mutation appears to represent a later step in the development of this cell-type. Encodes a beta-galactosidase involved in seed coat mucilage biosynthesis. Member of Glycoside Hydrolase Family 35	seed development	Yi‐Chen Lee et al., 2021
Cotton_A_05085	AT5G48740		protein phosphorylation;phosphorylation;phosphate-containing compound metabolic process;phosphorus metabolic process;protein modification process;cellular protein modification process;macromolecule modification;protein metabolic process;metabolic process;primary metabolic process;macromolecule metabolic process;cellular protein metabolic process;cellular macromolecule metabolic process;cellular p…	Leucine-rich repeat protein kinase family protein	salt stress response	Jiaxian He et al. 2021
Cotton_A_05112	AT5G21105		single-organism process;metabolic process;oxidation-reduction process;single-organism metabolic process;catalytic activity;copper ion binding;binding;oxidoreductase activity;transition metal ion binding;cation binding;ion binding;metal ion binding;cell periphery;external encapsulating structure;cell wall;extracellular region;symplast;cell junction;plasmodesma;cell-cell junction;cell part;cell;	Plant L-ascorbate oxidase	seed development	Atsuko Yamamoto et al., 2005
Cotton_A_05341	AT5G45470		cell periphery;plasma membrane;integral component of membrane;intrinsic component of membrane;membrane part;membrane;cell part;cell;	transmembrane protein, putative (DUF594)
Cotton_A_05360
Cotton_A_06179	AT1G69310	WRKY57	response to stimulus;response to chemical;regulation of cellular process;regulation of biological process;response to stress;response to abiotic stimulus;response to oxygen-containing compound;biological regulation;response to acid chemical;metabolic process;primary metabolic process;regulation of primary metabolic process;regulation of metabolic process;organic cyclic compound biosynthetic proce…	Encodes WRKY57, a member of the WRKY Transcription Factor. Activation of WRKY57 confers drought tolerance.	drought stress response	Yanjuan Jiang et al., 2016
Cotton_A_06486	AT3G44730	KP1	single-organism process;single-organism cellular process;metabolic process;oxidation-reduction process;single-organism metabolic process;cellular process;cellular metabolic process;catalytic activity;hydrolase activity;protein complex;intracellular membrane-bounded organelle;intracellular part;organelle part;cell part;membrane-bounded organelle;cytoplasmic part;mitochondrion;macromolecular comple…	kinesin-like protein 1	Cell proliferation	Cheng Zhi Ni et al., 2005
Cotton_A_06848	AT1G75260		catalytic activity;oxidoreductase activity;intracellular membrane-bounded organelle;intracellular part;cell part;membrane-bounded organelle;cytoplasmic part;intracellular organelle;cell;plastid;organelle;intracellular;chloroplast;cytoplasm;
Cotton_A_07447	AT5G59810	SBT5.4	single-organism process;tissue development;anatomical structure development;developmental process;single-multicellular organism process;multicellular organismal process;single-organism developmental process;meristem development;regulation of biological process;protein metabolic process;biological regulation;growth;proteolysis;metabolic process;primary metabolic process;macromolecule metabolic pro…	ATSBT5.4	flower development	Jian-Xiang Liu et al., 2009
Cotton_A_07609	AT1G73590	PIN1	phosphorylation;regionalization;response to stimulus;xylem and phloem pattern formation;pattern specification process;single-organism process;plant organ development;shoot system morphogenesis;anatomical structure development;signal transduction;single organism signaling;signaling;developmental process;phosphate-containing compound metabolic process;phosphorus metabolic process;system development…	Encodes an auxin efflux carrier involved in shoot and root development. It is involved in the maintenance of embryonic auxin gradients. Loss of function severely affects organ initiation, pin1 mutants are characterised by an inflorescence meristem that does not initiate any flowers, resulting in the formation of a naked inflorescence stem. PIN1 is involved in the determination of leaf shape by ac…
Cotton_A_07778	AT3G57880	FTIP3	catalytic activity;transferase activity;cell periphery;external encapsulating structure;cell wall;integral component of membrane;intrinsic component of membrane;membrane part;membrane;symplast;cell junction;plasmodesma;cell-cell junction;endoplasmic reticulum;intracellular membrane-bounded organelle;intracellular part;cell part;membrane-bounded organelle;endomembrane system;cytoplasmic part;mitoc…	Required for maintenance of inflorescence and shoot SAMs and normal development of the derived vascular cambium, functions in the SAM to promote continuous organogenesis, affects SAM development through STM, where it affects intracellular localization of STM in SAM cells in the peripheral region and prevents STM localization toward the cell wall of SAM cells in the peripheral region.	stem development	Lu Liu et al.,2018
Cotton_A_07957	AT5G45440		response to stimulus;response to stress;defense response;ATP binding;adenyl ribonucleotide binding;adenyl nucleotide binding;purine ribonucleoside triphosphate binding;ribonucleoside binding;purine nucleotide binding;purine ribonucleotide binding;purine ribonucleoside binding;purine nucleoside binding;nucleoside binding;ribonucleotide binding;carbohydrate derivative binding;nucleotide binding;nuc…	P-loop containing nucleoside triphosphate hydrolases superfamily protein;
Cotton_A_08404	AT3G01680	SEOB1	tissue development;anatomical structure development;developmental process;binding;protein binding;intracellular membrane-bounded organelle;intracellular part;cell part;membrane-bounded organelle;nucleus;intracellular organelle;cell;organelle;intracellular;	Encodes a protein localized to phloem filaments that is required for phloem filament formation. The mRNA is cell-to-cell mobile.	disease resistance	Chiara Bernardini et al., 2020
Cotton_A_08461	AT1G11915		binding;integral component of membrane;intrinsic component of membrane;membrane part;membrane;extracellular region;	wall-associated receptor kinase galacturonan-binding protein
Cotton_A_08556	AT3G14240	SBT1.5	protein metabolic process;proteolysis;metabolic process;primary metabolic process;macromolecule metabolic process;organic substance metabolic process;serine-type endopeptidase activity;serine-type peptidase activity;serine hydrolase activity;catalytic activity;endopeptidase activity;peptidase activity, acting on L-amino acid peptides;peptidase activity;hydrolase activity;extracellular region;	Encodes a subtilisin-like serine protease essential for mucilage release from seed coats.	seed development
Cotton_A_08661	AT1G46264	SCZ	single-organism process;regulation of cellular process;single-organism cellular process;regulation of biological process;cell division;biological regulation;metabolic process;primary metabolic process;regulation of primary metabolic process;regulation of metabolic process;organic cyclic compound biosynthetic process;gene expression;heterocycle metabolic process;regulation of macromolecule metabol…	Encodes SCHIZORIZA, a member of Heat Shock Transcription Factor (Hsf) family. Functions as a nuclear factor regulating asymmetry of stem cell divisions.		Tahmina Begum et al., 2013
Cotton_A_08904	AT2G21250		response to stimulus;single-organism process;response to chemical;metabolic process;response to inorganic substance;oxidation-reduction process;single-organism metabolic process;catalytic activity;oxidoreductase activity;intracellular part;cytosol;cell part;cytoplasmic part;cell;intracellular;cytoplasm;	NAD(P)-linked oxidoreductase superfamily protein
Cotton_A_09118	AT4G31350		catalytic activity;transferase activity;integral component of membrane;intrinsic component of membrane;membrane part;membrane;intracellular membrane-bounded organelle;intracellular part;cell part;membrane-bounded organelle;cytoplasmic part;mitochondrion;intracellular organelle;cell;organelle;intracellular;cytoplasm;	Core-2/I-branching beta-1,6-N-acetylglucosaminyltransferase family protein
Cotton_A_09270	AT3G14470	AC2	response to stimulus;response to stress;defense response;ATP binding;adenyl ribonucleotide binding;adenyl nucleotide binding;purine ribonucleoside triphosphate binding;ribonucleoside binding;purine nucleotide binding;purine ribonucleotide binding;purine ribonucleoside binding;purine nucleoside binding;nucleoside binding;ribonucleotide binding;carbohydrate derivative binding;nucleotide binding;nuc…	NB-ARC domain-containing disease resistance protein	salt stress response
Cotton_A_09634	AT3G17350		phosphorylation;phosphate-containing compound metabolic process;phosphorus metabolic process;metabolic process;cellular process;cellular metabolic process;kinase activity;transferase activity, transferring phosphorus-containing groups;catalytic activity;transferase activity;binding;extracellular region;	wall-associated receptor kinase carboxy-terminal protein
Cotton_A_10342	AT2G20080	TIE1	regulation of cellular process;regulation of biological process;biological regulation;metabolic process;primary metabolic process;regulation of primary metabolic process;regulation of metabolic process;organic cyclic compound biosynthetic process;gene expression;negative regulation of biological process;heterocycle metabolic process;regulation of macromolecule metabolic process;regulation of RNA …	Encodes TCP INTERACTOR-CONTAINING EAR MOTIF PROTEIN 1 (TIE1), an important repressor of CINCINNATA (CIN)-like TEOSINTE BRANCHED1/CYCLOIDEA/PCF (TCP) transcription factors, which are key for leaf development.	leaf development
Cotton_A_11064	AT2G27140		response to stimulus;response to stress;response to abiotic stimulus;integral component of membrane;intrinsic component of membrane;membrane part;membrane;intracellular membrane-bounded organelle;intracellular part;cell part;membrane-bounded organelle;nucleus;intracellular organelle;cell;organelle;intracellular;	HSP20-like chaperones superfamily protein
Cotton_A_11088	AT3G44200	Nek6	protein phosphorylation;phosphorylation;single-organism process;tissue development;anatomical structure development;developmental process;phosphate-containing compound metabolic process;phosphorus metabolic process;protein modification process;cellular protein modification process;macromolecule modification;single-organism cellular process;protein metabolic process;cellular developmental process;…	Encodes AtNek5, a member of the NIMA-related serine/threonine kinases (Neks) that have been linked to cell-cycle regulation in fungi and mammals. Plant Neks might be involved in plant development processes.Interacts physically with plant kinesins ARK1 and ARK2. Mutants show defects in root epidermal cell morphology, trichome branching and other epidermal cell abnormalities suggesting a rol e in e…	Cell wall synthesis	Shogo Takatani et al.,2020
Cotton_A_11140	AT3G24450	HMP27	ion transport;transport;establishment of localization;localization;copper ion binding;binding;transition metal ion binding;cation binding;ion binding;metal ion binding;	Heavy metal transport/detoxification superfamily protein
Cotton_A_11342	AT2G33790	AGP30	single-organism process;plant organ development;anatomical structure development;developmental process;system development;single-multicellular organism process;multicellular organismal process;single-organism developmental process;multicellular organism development;post-embryonic development;seed development;single organism reproductive process;reproduction;fruit development;reproductive structur…	Encodes an atypical arabinogalactan protein that is localized to the plasma membrange. AGP31 is highly expressed in flowers and vascular tissue and is repressed by jasmonic acid. AGP31 may play a role in vascular tissue function during defense and development.	Cell wall synthesis
Cotton_A_11521	AT3G55430		metabolic process;primary metabolic process;organic substance metabolic process;carbohydrate metabolic process;catalytic activity;hydrolase activity, hydrolyzing O-glycosyl compounds;hydrolase activity, acting on glycosyl bonds;hydrolase activity;cell periphery;external encapsulating structure;cell wall;extracellular region;symplast;cell junction;plasmodesma;cell-cell junction;cell part;cell;	O-Glycosyl hydrolases family 17 protein
Cotton_A_11726	AT1G14790	RDR1	response to stimulus;single-organism process;cellular response to organic substance;cellular response to chemical stimulus;response to chemical;cellular response to stimulus;response to organic cyclic compound;regulation of cellular process;single-organism cellular process;regulation of biological process;response to stress;response to organic substance;response to oxygen-containing compound;defe…	Encodes RNA-dependent RNA polymerase. While not required for virus-induced post-transcriptional gene silencing (PTGS), it can promote turnover of viral RNAs in infected plants. Nomenclature according to Xie, et al. (2004). Involved in the production of Cucumber Mosaic Virus siRNAs	disease resistance	Tao Xu et al., 2013
Cotton_A_12092	AT5G03150	JKD	single-organism process;tissue development;plant organ development;anatomical structure development;developmental process;system development;single-multicellular organism process;multicellular organismal process;single-organism developmental process;multicellular organism development;meristem development;root system development;regulation of cellular process;single-organism cellular process;regul…	C2H2-like zinc finger protein	seed development	Atsushi Kobayashi et al., 2017
Cotton_A_12374	AT5G46530		integral component of membrane;intrinsic component of membrane;membrane part;membrane;intracellular membrane-bounded organelle;intracellular part;cell part;membrane-bounded organelle;cytoplasmic part;intracellular organelle;cell;plastid;organelle;intracellular;chloroplast;cytoplasm;	AWPM-19-like family protein
Cotton_A_12671	AT5G42350	CFK1	single-organism process;regulation of cellular process;single-organism cellular process;regulation of biological process;biological regulation;growth;regulation of biological quality;cellular component organization or biogenesis;cellular component organization;cellular process;catalytic activity;transferase activity;protein complex;intracellular part;cell part;macromolecular complex;cell;intracel…	Encodes CFK1 (COP9 INTERACTING F-BOX KELCH 1), a CSN (COP9 signalosome)-interacting F-box protein. CFK1 is a component of a functional ubiquitin ligase complex. CFK1 promotes hypocotyl elongation by increasing cell size.		Jiani Chen et al., 2020
Cotton_A_12733	AT3G43660		integral component of membrane;intrinsic component of membrane;membrane part;membrane;vacuole;bounding membrane of organelle;intracellular membrane-bounded organelle;intracellular part;organelle part;cell part;membrane-bounded organelle;vacuolar part;cytoplasmic part;organelle membrane;vacuolar membrane;intracellular organelle;cell;whole membrane;organelle;intracellular;intracellular organelle pa…	The gene encodes a putative nodulin-like21 protein		Julia Gollhofer et al., 2011
Cotton_A_12800	AT1G77380	AAP3	single-organism process;single-organism transport;single-organism localization;transmembrane transport;nitrogen compound transport;ion transport;transport;establishment of localization;localization;organic substance transport;transmembrane transporter activity;secondary active transmembrane transporter activity;active transmembrane transporter activity;substrate-specific transmembrane transporter…	member of AAAP family The mRNA is cell-to-cell mobile.	fruit development
Cotton_A_13561	AT1G31770	ABCG14	regionalization;xylem and phloem pattern formation;pattern specification process;single-organism process;plant organ development;shoot system morphogenesis;anatomical structure development;developmental process;system development;phyllome development;animal organ development;single-multicellular organism process;multicellular organismal process;post-embryonic morphogenesis;leaf development;organ …	ATP-binding cassette 14	root development	Jiangzhe Zhao et al., 2021
Cotton_A_13605	AT5G61480	PXY	protein phosphorylation;phosphorylation;single-organism process;tissue development;shoot system morphogenesis;anatomical structure development;developmental process;phosphate-containing compound metabolic process;phosphorus metabolic process;system development;protein modification process;cellular protein modification process;single-multicellular organism process;multicellular organismal process;…	Encodes PXY, a receptor-like kinase essential for maintaining polarity during plant vascular-tissue development.	Cell proliferation	Zhijie Li et al., 2017
Cotton_A_13822
Cotton_A_13982	AT5G17920	METS1	response to stimulus;single-organism process;response to chemical;single-organism cellular process;response to stress;response to abiotic stimulus;metabolic process;organic acid biosynthetic process;primary metabolic process;single-organism biosynthetic process;response to inorganic substance;small molecule metabolic process;small molecule biosynthetic process;nitrogen compound metabolic process;…	Encodes a cytosolic cobalamin-independent methionine synthase, involved in methionine regeneration via the activated methyl cycle (SAM cycle). The protein undergoes thiolation following treatment with the oxidant tert-butylhydroperoxide. The mRNA is cell-to-cell mobile.	disease resistance	Beatriz González et al., 2019
Cotton_A_14201	AT5G25830	GATA12	response to stimulus;single-organism process;single-organism cellular process;response to abiotic stimulus;cellular developmental process;cell differentiation;response to radiation;response to light stimulus;cellular process;binding;heterocyclic compound binding;transition metal ion binding;protein binding;organic cyclic compound binding;sequence-specific DNA binding;cation binding;nucleic acid b…	Encodes a member of the GATA factor family of zinc finger transcription factors.	seed development	Pratibha Ravindran et al., 2017
Cotton_A_14208	AT1G79760	DTA4	integral component of membrane;intrinsic component of membrane;membrane part;membrane;intracellular membrane-bounded organelle;intracellular part;cell part;membrane-bounded organelle;cytoplasmic part;intracellular organelle;cell;plastid;organelle;intracellular;chloroplast;cytoplasm;	Identified as target of the AGL15 binding motif CArG.
Cotton_A_14274	AT4G19120	ERD3	metabolic process;catalytic activity;transferase activity;integral component of membrane;intrinsic component of membrane;membrane part;membrane;endoplasmic reticulum;vacuole;Golgi apparatus;intracellular membrane-bounded organelle;intracellular part;organelle part;cell part;membrane-bounded organelle;endomembrane system;cytoplasmic part;intracellular organelle;cell;organelle;intracellular;intrace…	S-adenosyl-L-methionine-dependent methyltransferases superfamily protein
Cotton_A_14287	AT5G36890		response to stimulus;single-organism process;cellular response to hormone stimulus;cellular response to endogenous stimulus;cellular response to organic substance;cellular response to chemical stimulus;response to chemical;cellular response to stimulus;cellular response to oxygen-containing compound;response to ethylene;response to stress;response to organic substance;response to oxygen-containin…	beta glucosidase 42
Cotton_A_14511	AT3G24620	ROPGEF8	binding;protein binding;cell periphery;plasma membrane;membrane;cell part;cell;	Encodes a member of KPP-like gene family, homolog of KPP (kinase partner protein) gene in tomato. Also a member of the RopGEF (guanine nucleotide exchange factor) family, containing the novel PRONE domain (plant-specific Rop nucleotide exchanger), which is exclusively active towards members of the Rop subfamily.	flower development	Yuexuan Yu et al., 2017
Cotton_A_15098	AT1G78950	BAS	catalytic activity;intracellular membrane-bounded organelle;intracellular part;cell part;membrane-bounded organelle;nucleus;intracellular organelle;cell;organelle;intracellular;	Terpenoid cyclases family protein		Masaaki Shibuya et al., 2008
Cotton_A_15371	AT2G41370	BOP2	regionalization;response to stimulus;pattern specification process;single-organism process;tissue development;plant organ development;shoot system morphogenesis;anatomical structure development;signal transduction;single organism signaling;signaling;developmental process;system development;phyllome development;animal organ development;protein modification process;cellular response to hormone stim…	Encodes BOP2, a cytoplasmic and nuclear-localized NPR1 like protein with BTB/POZ domain and ankyrin repeats. Interacts with BOP1 and appears to be genetically redundant with BOP1.bop1/bop2 double mutants have longer leaves, often with leaflets on the petiole, asymmetric flowers with extra organs and no nectaries. Also defective in floral organ abscission. BOP1/2 promotes floral meristem fate and …	abscission	Madiha Khan et al., 2014
Cotton_A_15722	AT3G14172		intracellular membrane-bounded organelle;intracellular part;cell part;membrane-bounded organelle;nucleus;intracellular organelle;cell;organelle;intracellular;	GPI-anchored adhesin-like protein
Cotton_A_16190	AT3G01680	SEOR1	tissue development;anatomical structure development;developmental process;binding;protein binding;intracellular membrane-bounded organelle;intracellular part;cell part;membrane-bounded organelle;nucleus;intracellular organelle;cell;organelle;intracellular;	Encodes a protein localized to phloem filaments that is required for phloem filament formation. The mRNA is cell-to-cell mobile.	disease resistance	Chiara Bernardini et al., 2020
Cotton_A_16216	AT5G51060	RHD2	response to stimulus;single-organism process;tissue development;plant organ development;anatomical structure development;developmental process;system development;single-multicellular organism process;multicellular organismal process;response to chemical;single-organism developmental process;multicellular organism development;response to organic cyclic compound;anatomical structure morphogenesis;r…	RHD2 (along with RHD3 and RHD4) is required for normal root hair elongation. Has NADPH oxidase activity. Gene is expressed in the elongation and differention zone in trichoblasts and elongating root hairs. RDH2 is localized to the growing tips of root hair cells. It is required for the production of reactive oxygen species in response to extracellular ATP stimulus. The increase in ROS production …	root development	Lenka Kuběnová et al., 2022
Cotton_A_16389	AT2G42140	VQ18	intracellular membrane-bounded organelle;intracellular part;cell part;membrane-bounded organelle;cytoplasmic part;nucleus;mitochondrion;intracellular organelle;cell;organelle;intracellular;cytoplasm;	VQ18 is an ABA responsive gene and interacts with the ABI5 transcription factor. Along with its paralog VQ26, it is involved in negative regulation of ABA responses during early seedling development.	seed development
Cotton_A_16393	AT1G75500	WAT1	response to stimulus;single-organism process;anatomical structure development;signal transduction;single organism signaling;signaling;developmental process;cell wall biogenesis;cellular response to hormone stimulus;single-organism transport;cellular response to endogenous stimulus;cellular response to organic substance;plant-type cell wall biogenesis;cellular response to chemical stimulus;single-…	An Arabidopsis thaliana homolog of Medicago truncatula NODULIN21 (MtN21). The gene encodes a plant-specific, predicted integral membrane protein and is a member of the Plant-Drug/Metabolite Exporter (P-DME) family (Transporter Classification number: TC 2.A.7.3) and the nodulin MtN21-like transporter family.	Cell wall synthesis	Philippe Ranocha et al., 2013
Cotton_A_16579	AT4G18010	5PTASE2	response to stimulus;single-organism process;anatomical structure development;signal transduction;single organism signaling;signaling;developmental process;phosphate-containing compound metabolic process;phosphorus metabolic process;cellular response to hormone stimulus;cellular response to endogenous stimulus;cellular response to organic substance;cellular response to chemical stimulus;single-mu…	Encodes an inositol polyphosphate 5-phosphatase that appears to have Type I activity. It can dephosphorylate IP3(inositol(1,4,5)P3) and IP4 (inositol(1,3,4,5)P4), but it does not appear to be active against phosphatidylinositol 4,5 bisphosphate. Overexpression of this gene renders plants insensitive to ABA in germination and growth assays.
Cotton_A_16793	AT1G53050		ATP binding;adenyl ribonucleotide binding;adenyl nucleotide binding;purine ribonucleoside triphosphate binding;kinase activity;ribonucleoside binding;purine nucleotide binding;purine ribonucleotide binding;purine ribonucleoside binding;purine nucleoside binding;nucleoside binding;transferase activity, transferring phosphorus-containing groups;ribonucleotide binding;carbohydrate derivative binding…	Protein kinase superfamily protein
Cotton_A_17093	AT1G80870		ATP binding;adenyl ribonucleotide binding;adenyl nucleotide binding;purine ribonucleoside triphosphate binding;kinase activity;ribonucleoside binding;purine nucleotide binding;purine ribonucleotide binding;purine ribonucleoside binding;purine nucleoside binding;nucleoside binding;transferase activity, transferring phosphorus-containing groups;ribonucleotide binding;carbohydrate derivative binding…	Encodes a member of the proline-rich extensin-like receptor kinase (PERK) family. This family consists of 15 predicted receptor kinases (PMID: 15653807).	seed development	Yosr Z Haffani et al., 2006
Cotton_A_17149	AT3G14470	AC2	response to stimulus;response to stress;defense response;ATP binding;adenyl ribonucleotide binding;adenyl nucleotide binding;purine ribonucleoside triphosphate binding;ribonucleoside binding;purine nucleotide binding;purine ribonucleotide binding;purine ribonucleoside binding;purine nucleoside binding;nucleoside binding;ribonucleotide binding;carbohydrate derivative binding;nucleotide binding;nuc…	NB-ARC domain-containing disease resistance protein	disease resistance
Cotton_A_17525	AT5G45780	CIK4	enzyme linked receptor protein signaling pathway;transmembrane receptor protein tyrosine kinase signaling pathway;cell surface receptor signaling pathway;protein phosphorylation;phosphorylation;response to stimulus;single-organism process;signal transduction;single organism signaling;signaling;phosphate-containing compound metabolic process;phosphorus metabolic process;protein modification proces…	NSP-interacting kinase (NIK1), receptor-like kinase, involved in defense response against geminivirus It acts as a virulence target of the begomovirus nuclear shuttle protein (NSP).	disease resistance	Chong Hu et al., 2018
Cotton_A_17768	AT4G28000		ATP binding;adenyl ribonucleotide binding;adenyl nucleotide binding;purine ribonucleoside triphosphate binding;ribonucleoside binding;purine nucleotide binding;purine ribonucleotide binding;purine ribonucleoside binding;purine nucleoside binding;nucleoside binding;ribonucleotide binding;carbohydrate derivative binding;catalytic activity;nucleotide binding;nucleoside phosphate binding;small molecu…	P-loop containing nucleoside triphosphate hydrolases superfamily protein		Muhammad Amjad Ali et al., 2013
Cotton_A_18254	AT5G42146		integral component of membrane;intrinsic component of membrane;membrane part;membrane;intracellular membrane-bounded organelle;intracellular part;cell part;membrane-bounded organelle;cytoplasmic part;mitochondrion;intracellular organelle;cell;organelle;intracellular;cytoplasm;	transmembrane protein
Cotton_A_18279	AT4G17220	MAP70-5	regionalization;xylem and phloem pattern formation;pattern specification process;single-organism process;anatomical structure development;developmental process;cell wall biogenesis;plant-type cell wall biogenesis;single-multicellular organism process;plant-type cell wall organization or biogenesis;multicellular organismal process;single-organism developmental process;multicellular organism develo…	Encodes a microtubule associated protein (MAP70-5). Regulates secondary wall patterning in wood cells. Expressed in all tissues.	Cell wall synthesis	Edouard Pesquet et al., 2010
Cotton_A_18306	AT3G16520	UGT88A1	metabolic process;catalytic activity;transferase activity;intracellular membrane-bounded organelle;intracellular part;cytosol;cell part;membrane-bounded organelle;cytoplasmic part;nucleus;intracellular organelle;cell;organelle;intracellular;cytoplasm;	UDP-glucosyl transferase 88A1		Jingyuan Weng et al., 2019
Cotton_A_18490	AT3G62630		intracellular membrane-bounded organelle;intracellular part;cell part;membrane-bounded organelle;nucleus;intracellular organelle;cell;organelle;intracellular;	stress response NST1-like protein (DUF1645)
Cotton_A_18889	AT3G14067	SBT1.4	single-organism process;plant organ development;shoot system morphogenesis;anatomical structure development;developmental process;system development;phyllome development;animal organ development;single-multicellular organism process;multicellular organismal process;leaf development;anatomical structure formation involved in morphogenesis;single-organism developmental process;multicellular organis…	Encodes a protein with similarity to serine protease, subtilisin, that is upregulated during senescence and expressed in the arial portions of the plant.Loss of function mutations have increased branch number but normal silique length and seed set and therefore have increased fertility.	drought stress response	Qianqian Wang et al., 2018
Cotton_A_18959	AT3G14310	PME3	response to stimulus;cell wall organization or biogenesis;response to stress;defense response;cell wall organization;external encapsulating structure organization;polysaccharide metabolic process;metabolic process;primary metabolic process;cellular component organization or biogenesis;response to external biotic stimulus;response to other organism;multi-organism process;response to biotic stimulu…	encodes a pectin methylesterase, targeted by a cellulose binding protein (CBP) from the parasitic nematode Heterodera schachtii during parasitism.	Cell wall synthesis	Stéphanie Guénin et al., 2017
Cotton_A_19061	AT1G49230	ATL78	protein modification process;cellular protein modification process;macromolecule modification;protein metabolic process;metabolic process;primary metabolic process;macromolecule metabolic process;cellular protein metabolic process;cellular macromolecule metabolic process;cellular process;organic substance metabolic process;cellular metabolic process;binding;transition metal ion binding;cation bin…	RING/U-box superfamily protein	drought stress response	Ji Yeon Suh et al., 2015
Cotton_A_19300	AT4G08850	LRR-KISS	protein phosphorylation;phosphorylation;response to stimulus;anatomical structure development;developmental process;phosphate-containing compound metabolic process;phosphorus metabolic process;protein modification process;cellular protein modification process;multicellular organismal process;response to chemical;reproduction;macromolecule modification;reproductive process;developmental process in…	Encodes GASSHO1 (GSO1), a putative leucine-rich repeat transmembrane-type receptor kinase. GSO1 and a homolog GSO2 (At5g44700) are required for the formation of a normal epidermal surface during embryogenesis. Necessary for localizing CASPARIAN STRIP DOMAIN PROTEINS (CASPs) - major players of endodermal differentiation - into an uninterrupted, ring-like domain.	salt stress response	Adriana Racolta,Anthony C Bryan et al., 2014
Cotton_A_19655	AT5G59080	SIS	response to stimulus;response to stress;intracellular membrane-bounded organelle;intracellular part;cell part;membrane-bounded organelle;nucleus;intracellular organelle;cell;organelle;intracellular;	Encodes a protein involved in salt tolerance, names SIS (Salt Induced Serine rich)	salt stress response
Cotton_A_19911	AT5G63380		single-organism process;single-organism cellular process;metabolic process;organic acid biosynthetic process;single-organism biosynthetic process;small molecule metabolic process;small molecule biosynthetic process;single-organism metabolic process;cellular process;biosynthetic process;organic acid metabolic process;organic substance metabolic process;organic substance biosynthetic process;cellul…	Encodes a peroxisomal protein involved in the activation of fatty acids through esterification with CoA. At5g63380 preferentially activates fatty acids with increased chain length (C9:0 to C8:0) and thus shares characteristics with long-chain fatty acyl-CoA synthases. Also able to catalyze the conversion of OPDA to its CoA ester and is therefore thought to be involved in the peroxisomal β-oxidati…
Cotton_A_19980	AT5G01890	PXC2	enzyme linked receptor protein signaling pathway;transmembrane receptor protein tyrosine kinase signaling pathway;cell surface receptor signaling pathway;protein phosphorylation;phosphorylation;response to stimulus;single-organism process;signal transduction;single organism signaling;signaling;phosphate-containing compound metabolic process;phosphorus metabolic process;protein modification proces…	LRR-RLK with distinct polar localization within the plasma membrane in different cell types of the root. Mutants show defects in cell divisions within the root ground tissue.	root development	Cecilia Rodriguez-Furlan et al., 2022
Cotton_A_20043	AT2G29130	LAC2	response to stimulus;single-organism process;response to chemical;single-organism cellular process;response to stress;response to abiotic stimulus;response to oxygen-containing compound;response to acid chemical;metabolic process;response to inorganic substance;oxidation-reduction process;organic substance catabolic process;organic cyclic compound metabolic process;single-organism metabolic proce…	Putative laccase, knockout mutant had reduced root elongation under PEG-induced dehydration.miR397b regulates root lignin deposition by regulating LACCASE2 expression during drought and phosphate deficiency.	Cell wall synthesis	Yunqing Yu et al., 2020
Cotton_A_20282	AT2G38080	LAC4	single-organism process;cell wall biogenesis;plant-type cell wall biogenesis;plant-type cell wall organization or biogenesis;cell wall organization or biogenesis;single-organism cellular process;metabolic process;organic cyclic compound biosynthetic process;cellular component organization or biogenesis;single-organism biosynthetic process;oxidation-reduction process;aromatic compound biosynthetic…	LAC4 appears to have laccase activity based on enzyme assays performed using lac4 mutants. These mutants also have reduced levels of lignin. LAC4 is expressed in vascular bundles and fibers and likely contributes to lignin biosynthesis, and hence cell wall biosynthesis, there. lac4/irx12 mutants have a mild irregular xylem phenotype.	Cell wall synthesis	Mathias Schuetz et al., 2014
Cotton_A_20534	AT3G50170		cell periphery;plasma membrane;integral component of membrane;intrinsic component of membrane;membrane part;membrane;cell part;cell;	transmembrane protein, putative (DUF247)
Cotton_A_21031	AT3G01860		response to stimulus;response to chemical;response to inorganic substance;intracellular membrane-bounded organelle;intracellular part;cell part;membrane-bounded organelle;nucleus;intracellular organelle;cell;organelle;intracellular;	hypothetical protein
Cotton_A_21234	AT3G17380		intracellular membrane-bounded organelle;intracellular part;cell part;membrane-bounded organelle;nucleus;intracellular organelle;cell;organelle;intracellular;	TRAF-like family protein
Cotton_A_21544	AT2G23360		intracellular part;cell part;cell;intracellular;cytoplasm;	TCS1 encodes a coiled-coil domain protein that binds to microtubules and co-localizes with the cortical microtubules. Mutants have defects in trichome branching and hypocotyl elongation. TCS1 interacts with ZWI and appears to be involved in microtubule assembly.
Cotton_A_22275	AT4G27220		response to stimulus;response to stress;defense response;ATP binding;adenyl ribonucleotide binding;adenyl nucleotide binding;purine ribonucleoside triphosphate binding;ribonucleoside binding;purine nucleotide binding;purine ribonucleotide binding;purine ribonucleoside binding;purine nucleoside binding;nucleoside binding;ribonucleotide binding;carbohydrate derivative binding;nucleotide binding;nuc…	NB-ARC domain-containing disease resistance protein	disease resistance	Lizhi Zhang et al., 2010
Cotton_A_22470
Cotton_A_22606	AT5G10530	LECRK-IX.1	protein phosphorylation;phosphorylation;response to stimulus;single-organism process;phosphate-containing compound metabolic process;phosphorus metabolic process;protein modification process;cellular protein modification process;macromolecule modification;regulation of cellular process;single-organism cellular process;regulation of biological process;response to stress;defense response;protein me…	Concanavalin A-like lectin protein kinase family protein	disease resistance	Yan Wang et al., 2016
Cotton_A_23546	AT5G67200		enzyme linked receptor protein signaling pathway;transmembrane receptor protein tyrosine kinase signaling pathway;cell surface receptor signaling pathway;protein phosphorylation;phosphorylation;response to stimulus;single-organism process;signal transduction;single organism signaling;signaling;phosphate-containing compound metabolic process;phosphorus metabolic process;protein modification proces…	Leucine-rich repeat protein kinase family protein
Cotton_A_23557	AT4G37250		enzyme linked receptor protein signaling pathway;transmembrane receptor protein tyrosine kinase signaling pathway;cell surface receptor signaling pathway;protein phosphorylation;phosphorylation;response to stimulus;single-organism process;signal transduction;single organism signaling;signaling;phosphate-containing compound metabolic process;phosphorus metabolic process;protein modification proces…	receptor-like kinase	disease resistance	Yaofei Zhao et al., 2018
Cotton_A_23892	AT1G12260	VND4	single-organism process;tissue development;anatomical structure development;developmental process;system development;cell wall biogenesis;plant-type cell wall biogenesis;single-multicellular organism process;plant-type cell wall organization or biogenesis;multicellular organismal process;single-organism developmental process;multicellular organism development;post-embryonic development;seed devel…	Encodes a NAC-domain transcription factor that is expressed in developing xylem. Over expression of this protein causes ectopic secondary cell wall growth. Complements some of the cell wall defects seen in SND1/NST1 double mutants.
Cotton_A_24404	AT4G00080	PMEI9	single-organism process;single organism reproductive process;reproduction;reproductive process;multi-organism process;	PMEI9 pectin methyleseterase inhibitor. Expressed in many plant tissues.	Cell wall synthesis and root development
Cotton_A_24859
Cotton_A_25443	AT5G09220	AAP2	single-organism process;single-organism transport;single-organism localization;transmembrane transport;nitrogen compound transport;ion transport;transport;establishment of localization;localization;organic substance transport;transmembrane transporter activity;secondary active transmembrane transporter activity;active transmembrane transporter activity;substrate-specific transmembrane transporter…	member of AAAP family The mRNA is cell-to-cell mobile.	fruit development	Lizhi Zhang et al., 2010
Cotton_A_25640	AT1G61890		response to stimulus;single-organism process;single-organism transport;single-organism localization;response to chemical;transmembrane transport;response to abiotic stimulus;transport;establishment of localization;localization;transmembrane transporter activity;secondary active transmembrane transporter activity;active transmembrane transporter activity;transporter activity;integral component of …	MATE efflux family protein	leaf development
Cotton_A_26205	AT3G47510		integral component of membrane;intrinsic component of membrane;membrane part;membrane;extracellular region;	transmembrane protein
Cotton_A_26662	AT1G13920		binding;heterocyclic compound binding;organic cyclic compound binding;nucleic acid binding;DNA binding;intracellular part;cell part;cell;intracellular;cytoplasm;	Remorin family protein
Cotton_A_26953	AT3G25500	AFH1	single-organism process;regulation of cellular process;single-organism cellular process;regulation of biological process;biological regulation;regulation of biological quality;cellular component organization or biogenesis;positive regulation of biological process;negative regulation of biological process;cellular component organization;cellular process;cellular component biogenesis;negative regul…	Localizes to plasmodesmata (PD) through its transmembrane domain and is required for normal intercellular trafficking. Functions in a partially redundant manner with its closest homolog AtFH1. Regulates PD's permeability by anchoring actin filaments to PD. Caps the barbed end of actin filaments and stabilizes them in vitro	Cross-linked actin filaments to microtubules	Denisa Oulehlov et al., 2019
Cotton_A_27100	AT5G24620		response to stimulus;response to external biotic stimulus;response to other organism;multi-organism process;response to biotic stimulus;response to external stimulus;extracellular region;	Pathogenesis-related thaumatin superfamily protein
Cotton_A_27115	AT1G47890	RLP7	response to stimulus;single-organism process;signal transduction;single organism signaling;signaling;cell communication;cellular response to stimulus;regulation of cellular process;single-organism cellular process;regulation of biological process;response to stress;defense response;biological regulation;cellular process;kinase activity;transferase activity, transferring phosphorus-containing grou…	receptor like protein 7
Cotton_A_27181	AT2G38905		response to stimulus;response to stress;response to abiotic stimulus;integral component of membrane;intrinsic component of membrane;membrane part;membrane;	Induced by low temperatures, dehydration and salt stress and ABA. Encodes a small (54 amino acids), highly hydrophobic protein that bears two potential transmembrane domains.	salt stress response
Cotton_A_27340	AT2G17230	EXL5	single-organism process;metabolic process;primary metabolic process;single-organism metabolic process;organic substance metabolic process;catalytic activity;hydrolase activity;extracellular region;apoplast;	EXORDIUM like 5
Cotton_A_28624	AT3G23240	ERF1	response to stimulus;single-organism process;signal transduction;single organism signaling;signaling;cellular response to hormone stimulus;cellular response to endogenous stimulus;cellular response to organic substance;cellular response to chemical stimulus;cell communication;response to chemical;hormone-mediated signaling pathway;cellular response to stimulus;cellular response to oxygen-containi…	encodes a member of the ERF (ethylene response factor) subfamily B-3 of ERF/AP2 transcription factor family. The protein contains one AP2 domain. There are 18 members in this subfamily including ATERF-1, ATERF-2, AND ATERF-5	seed development,drought stress response
Cotton_A_29283	AT4G27220		response to stimulus;response to stress;defense response;ATP binding;adenyl ribonucleotide binding;adenyl nucleotide binding;purine ribonucleoside triphosphate binding;ribonucleoside binding;purine nucleotide binding;purine ribonucleotide binding;purine ribonucleoside binding;purine nucleoside binding;nucleoside binding;ribonucleotide binding;carbohydrate derivative binding;nucleotide binding;nuc…	NB-ARC domain-containing disease resistance protein		Jingdan Shen et al., 2006
Cotton_A_29288	AT4G27190		response to stimulus;response to stress;defense response;ATP binding;adenyl ribonucleotide binding;adenyl nucleotide binding;purine ribonucleoside triphosphate binding;ribonucleoside binding;purine nucleotide binding;purine ribonucleotide binding;purine ribonucleoside binding;purine nucleoside binding;nucleoside binding;ribonucleotide binding;carbohydrate derivative binding;nucleotide binding;nuc…	NB-ARC domain-containing disease resistance protein		Jingdan Shen et al., 2006
Cotton_A_29605	AT2G23360			filament-like protein (DUF869)
Cotton_A_29822	AT3G20015		protein metabolic process;proteolysis;metabolic process;primary metabolic process;macromolecule metabolic process;organic substance metabolic process;binding;heterocyclic compound binding;organic cyclic compound binding;nucleic acid binding;DNA binding;extracellular region;	Encodes ASPG1 (ASPARTIC PROTEASE IN GUARD CELL 1). Functions in drought avoidance through abscisic acid (ABA) signalling in guard cells	seed development
Cotton_A_29964	AT3G44716		intracellular membrane-bounded organelle;intracellular part;cell part;membrane-bounded organelle;cytoplasmic part;mitochondrion;intracellular organelle;cell;organelle;intracellular;cytoplasm;	hypothetical protein
Cotton_A_29997	AT1G48570	SED1	binding;transition metal ion binding;cation binding;ion binding;zinc ion binding;metal ion binding;intracellular membrane-bounded organelle;intracellular part;cell part;membrane-bounded organelle;cytoplasmic part;intracellular organelle;cell;plastid;organelle;intracellular;chloroplast;cytoplasm;	SED1 is a protein of unknown function that is located in the mitochondrion. sed1 mutants are embryo lethal.	seed development
Cotton_A_30234	AT1G28130	GH3.17	response to stimulus;response to chemical;response to auxin;response to organic substance;response to endogenous stimulus;biological regulation;response to hormone;regulation of biological quality;homeostatic process;catalytic activity;intracellular membrane-bounded organelle;intracellular part;cell part;membrane-bounded organelle;nucleus;intracellular organelle;cell;organelle;intracellular;cytop…	Encodes an IAA-amido synthase that conjugates Asp and other amino acids to auxin in vitro. Lines carrying insertions in this gene are hypersensitive to auxin.	root development	Emanuela Pierdonati et al., 2019
Cotton_A_30270	AT2G01820	TMK1	single-organism process;anatomical structure development;developmental process;single-multicellular organism process;multicellular organismal process;single-organism developmental process;multicellular organism development;ATP binding;adenyl ribonucleotide binding;adenyl nucleotide binding;purine ribonucleoside triphosphate binding;ribonucleoside binding;purine nucleotide binding;purine ribonucle…	Transmembrane kinase (TMK), member of the plant receptor-like kinase (RLK) family. TMKs are characterized by an extracellular leucine-rich-repeat (LRR) domain, a single transmembrane region and a cytoplasmic kinase domain. TMKs have been shown to act as critical modulators of cell expansion and cell proliferation.	root development	Hong Chen et al., 2020
Cotton_A_30387	AT1G24530		nucleotide binding;nucleoside phosphate binding;small molecule binding;binding;heterocyclic compound binding;organic cyclic compound binding;cell periphery;plasma membrane;membrane part;membrane;plasma membrane part;protein complex;intracellular part;cell part;macromolecular complex;cell;intracellular;	Transducin/WD40 repeat-like superfamily protein
Cotton_A_30823	AT5G39950	TRXH2	response to stimulus;single-organism process;protein modification process;cellular protein modification process;cellular response to chemical stimulus;response to chemical;cellular response to stimulus;macromolecule modification;regulation of cellular process;single-organism cellular process;regulation of biological process;response to stress;protein metabolic process;biological regulation;regula…	encodes a cytosolic thioredoxin that reduces disulfide bridges of target proteins by the reversible formation of a disulfide bridge between two neighboring Cys residues present in the active site. Thioredoxins have been found to regulate a variety of biological reactions in prokaryotic and eukaryotic cells.	cold stress response	Eun Seon Lee et al., 2021
Cotton_A_31015	AT2G26730	KOIN	enzyme linked receptor protein signaling pathway;transmembrane receptor protein tyrosine kinase signaling pathway;cell surface receptor signaling pathway;protein phosphorylation;phosphorylation;response to stimulus;single-organism process;signal transduction;single organism signaling;signaling;phosphate-containing compound metabolic process;phosphorus metabolic process;protein modification proces…	Leucine-rich repeat protein kinase family protein	root development	Cecilia Rodriguez-Furlan et al., 2022
Cotton_A_31319	AT4G37750	ANT	single-organism process;tissue development;anatomical structure development;developmental process;system development;animal organ development;single-multicellular organism process;multicellular organismal process;organ morphogenesis;single-organism developmental process;multicellular organism development;post-embryonic development;shoot system development;anatomical structure morphogenesis;single…	ANT is required for control of cell proliferation and encodes a putative transcriptional regulator similar to AP2. Loss of function alleles have reduced fertility, abnormal ovules and abnormal lateral organs. Expressed in the chalaza, floral organ primordia, and lateral shoot organ primordia. Regulates growth and cell numbers during organogenesis. Modulates auxin biosynthesis in the ovule via reg…	flower development	Beth A Krizek et al., 2020
Cotton_A_31365	AT1G54400		response to stimulus;response to stress;response to abiotic stimulus;integral component of membrane;intrinsic component of membrane;membrane part;membrane;intracellular part;cell part;cell;intracellular;cytoplasm;	HSP20-like chaperones superfamily protein
Cotton_A_31578	AT2G37460	UMAMIT14	single-organism process;single-organism transport;single-organism localization;nitrogen compound transport;biological regulation;transport;establishment of localization;regulation of biological quality;localization;homeostatic process;organic substance transport;transmembrane transporter activity;substrate-specific transmembrane transporter activity;transporter activity;substrate-specific transpo…	Encodes a plasma membrane-localized amino acid transporter likely involved in amino acid export in the developing seed.	root development
Cotton_A_31895	AT1G75500	WAT1	response to stimulus;single-organism process;anatomical structure development;signal transduction;single organism signaling;signaling;developmental process;cell wall biogenesis;cellular response to hormone stimulus;single-organism transport;cellular response to endogenous stimulus;cellular response to organic substance;plant-type cell wall biogenesis;cellular response to chemical stimulus;single-…	An Arabidopsis thaliana homolog of Medicago truncatula NODULIN21 (MtN21). The gene encodes a plant-specific, predicted integral membrane protein and is a member of the Plant-Drug/Metabolite Exporter (P-DME) family (Transporter Classification number: TC 2.A.7.3) and the nodulin MtN21-like transporter family.	Cell wall synthesis	Philippe Ranocha et al., 2013
Cotton_A_32062	AT4G12730	FLA1	response to stimulus;response to chemical;response to organic cyclic compound;response to organic substance;cell periphery;plasma membrane;intrinsic component of membrane;membrane part;membrane;plasma membrane part;intrinsic component of plasma membrane;vacuole;bounding membrane of organelle;intracellular membrane-bounded organelle;intracellular part;organelle part;cell part;membrane-bounded orga…	Encodes fasciclin-like arabinogalactan-protein 1 (Fla1). fla1 mutants show defects in shoot regeneration. Possibly involved in embryogenesis and seed development	Cell wall synthesis
Cotton_A_32092
Cotton_A_32314	AT3G06130	HMP25	ion transport;transport;establishment of localization;localization;binding;cation binding;ion binding;metal ion binding;cell periphery;external encapsulating structure;cell wall;intracellular part;cell part;cell;intracellular;cytoplasm;	Heavy metal transport/detoxification superfamily protein
Cotton_A_32495	AT5G22870		integral component of membrane;intrinsic component of membrane;membrane part;membrane;	Late embryogenesis abundant (LEA) hydroxyproline-rich glycoprotein family
Cotton_A_32578	AT4G37750	ANT	single-organism process;tissue development;anatomical structure development;developmental process;system development;animal organ development;single-multicellular organism process;multicellular organismal process;organ morphogenesis;single-organism developmental process;multicellular organism development;post-embryonic development;shoot system development;anatomical structure morphogenesis;single…	ANT is required for control of cell proliferation and encodes a putative transcriptional regulator similar to AP2. Loss of function alleles have reduced fertility, abnormal ovules and abnormal lateral organs. Expressed in the chalaza, floral organ primordia, and lateral shoot organ primordia. Regulates growth and cell numbers during organogenesis. Modulates auxin biosynthesis in the ovule via reg…	flower development	Beth A Krizek et al., 2020
Cotton_A_33187	AT4G02100		cellular process;intracellular membrane-bounded organelle;intracellular part;cell part;membrane-bounded organelle;nucleus;intracellular organelle;cell;organelle;intracellular;	Heat shock protein DnaJ with tetratricopeptide repeat-containing protein
Cotton_A_33239	AT5G24910	CYP714A1	single-organism process;metabolic process;oxidation-reduction process;single-organism metabolic process;catalytic activity;binding;oxidoreductase activity;heterocyclic compound binding;transition metal ion binding;organic cyclic compound binding;cation binding;ion binding;metal ion binding;integral component of membrane;intrinsic component of membrane;membrane part;membrane;endoplasmic reticulum;…	Member of CYP714A. Encodes one of the two tandemly duplicated gene pair ELA1 (CYP714A1) and ELA2 (CYP714A2), homologs of the rice cytochrome P450 monooxygenase gene EUI1. Double mutation of ELA1 and ELA2 results in increased biomass and enlarged organs.		Yingying Zhang et al., 2011
Cotton_A_33724	AT5G66920	SKS17	response to stimulus;single-organism process;response to abiotic stimulus;metabolic process;oxidation-reduction process;single-organism metabolic process;catalytic activity;copper ion binding;binding;oxidoreductase activity;transition metal ion binding;cation binding;ion binding;metal ion binding;cell periphery;external encapsulating structure;cell wall;extracellular region;symplast;cell junction…	SKU5 similar 17
Cotton_A_33908	AT1G67560		response to stimulus;single-organism process;single-organism cellular process;response to stress;growth;metabolic process;organic acid biosynthetic process;primary metabolic process;single-organism biosynthetic process;oxidation-reduction process;small molecule metabolic process;small molecule biosynthetic process;single-organism metabolic process;cellular process;biosynthetic process;organic aci…	PLAT/LH2 domain-containing lipoxygenase family protein	disease resistance	Edward E. Farmer et al., 2014
Cotton_A_34998	AT5G25830	GATA12	response to stimulus;single-organism process;single-organism cellular process;response to abiotic stimulus;cellular developmental process;cell differentiation;response to radiation;response to light stimulus;cellular process;binding;heterocyclic compound binding;transition metal ion binding;protein binding;organic cyclic compound binding;sequence-specific DNA binding;cation binding;nucleic acid b…	Encodes a member of the GATA factor family of zinc finger transcription factors.	seed development	Pratibha Ravindran et al., 2017
Cotton_A_35549
Cotton_A_35816	AT5G67360	SBT1.7	single-organism process;anatomical structure development;developmental process;system development;single-multicellular organism process;multicellular organismal process;single-organism developmental process;multicellular organism development;post-embryonic development;seed development;single organism reproductive process;reproduction;fruit development;reproductive structure development;reproducti…	Encodes a subtilisin-like serine protease essential for mucilage release from seed coats.	seed development	Carsten Rautengarten et al., 2008
Cotton_A_36293	AT1G79620	VRLK1	enzyme linked receptor protein signaling pathway;transmembrane receptor protein tyrosine kinase signaling pathway;cell surface receptor signaling pathway;protein phosphorylation;phosphorylation;response to stimulus;single-organism process;signal transduction;single organism signaling;signaling;phosphate-containing compound metabolic process;phosphorus metabolic process;protein modification proces…	VRLK1 is a LRR kinase involved in switching between cell elongation and secondary cell wall thickening.VRLK1 is a member of a gene family that includes a small number of recently duplicated paralogs.		Cheng Huang et al., 2018
Cotton_A_36511	AT3G51895	AST12	single-organism process;single-organism transport;single-organism localization;transmembrane transport;ion transport;transport;establishment of localization;localization;transmembrane transporter activity;secondary active transmembrane transporter activity;active transmembrane transporter activity;substrate-specific transmembrane transporter activity;transporter activity;substrate-specific transp…	Encodes a chloroplast-localized sulfate transporter.		Min-Jie Cao et al., 2012
Cotton_A_37190	AT3G30380		catalytic activity;hydrolase activity;extracellular region;	alpha/beta-Hydrolases superfamily protein
Cotton_A_37268	AT2G01950	VH1	enzyme linked receptor protein signaling pathway;transmembrane receptor protein tyrosine kinase signaling pathway;cell surface receptor signaling pathway;protein phosphorylation;phosphorylation;regionalization;response to stimulus;xylem and phloem pattern formation;pattern specification process;single-organism process;anatomical structure development;signal transduction;single organism signaling;…	mutant has Altered vascular cell differentiation; LRR Receptor Kinase	root development	Nicole K Clay et al., 2002
Cotton_A_37478	AT3G51550	FER	protein phosphorylation;phosphorylation;response to stimulus;single-organism process;plant organ development;anatomical structure development;signal transduction;single organism signaling;signaling;developmental process;phosphate-containing compound metabolic process;phosphorus metabolic process;system development;protein modification process;cellular response to hormone stimulus;cellular protein…	Encodes a synergid-expressed, plasma-membrane localized receptor-like kinase that accumulates asymetrically in the synergid membrnane at the filiform apparatus and mediates male-female gametophyte interactions during pollen tube reception. Also involved in powdery mildew infection. Mutants show faster root elongation under dim light, the protein is required for intracellular accumulation of AHA2 …	response to salt stress and disease resistance	Seung Yong Shin et al.,2021
Cotton_A_38225	AT3G47570			Leucine-rich repeat protein kinase family protein
Cotton_A_38228	AT3G47570		enzyme linked receptor protein signaling pathway;transmembrane receptor protein tyrosine kinase signaling pathway;cell surface receptor signaling pathway;protein phosphorylation;phosphorylation;response to stimulus;single-organism process;signal transduction;single organism signaling;signaling;phosphate-containing compound metabolic process;phosphorus metabolic process;protein modification proces…	Encodes a predicted leucine-rich repeat receptor kinase (LRR-RLK). Functions as the receptor for bacterial PAMP (pathogen associated molecular patterns) EF-Tu	disease resistance
Cotton_A_38290	AT1G70370	PG2	catalytic activity;hydrolase activity, hydrolyzing O-glycosyl compounds;hydrolase activity, acting on glycosyl bonds;hydrolase activity;cell periphery;external encapsulating structure;cell wall;extracellular region;apoplast;cell part;cell;	Polygalacturonase involved in cell wall modification.	Cell proliferation	Jiyoung Park et al., 2015
Cotton_A_38327	AT1G14390		enzyme linked receptor protein signaling pathway;transmembrane receptor protein tyrosine kinase signaling pathway;cell surface receptor signaling pathway;protein phosphorylation;phosphorylation;response to stimulus;single-organism process;signal transduction;single organism signaling;signaling;phosphate-containing compound metabolic process;phosphorus metabolic process;protein modification proces…	Leucine-rich repeat protein kinase family protein
Cotton_A_38407	AT4G00430	PIP1E	response to stimulus;single-organism process;single-organism transport;single-organism localization;response to chemical;transmembrane transport;response to stress;response to abiotic stimulus;response to oxygen-containing compound;ion transport;response to acid chemical;transport;establishment of localization;localization;response to inorganic substance;transmembrane transporter activity;substra…	a member of the plasma membrane intrinsic protein subfamily PIP1. involved redundantly with PIP1;1/2/3/5 in hydraulics and carbon fixation, regulates the expression of related genes that affect plant growth and development.	flower development	Xing Wang et al., 2021
Cotton_A_39398	AT3G09070	OPS	regionalization;xylem and phloem pattern formation;pattern specification process;single-organism process;tissue development;plant organ development;shoot system morphogenesis;anatomical structure development;developmental process;system development;phyllome development;animal organ development;single-organism transport;single-organism localization;single-multicellular organism process;multicellul…	Encodes a polarly localised membrane-associated protein that regulates phloem differentiation entry.	root development	Elisabeth Truernit et al., 2012
Cotton_A_39481	AT2G01990		intracellular membrane-bounded organelle;intracellular part;cell part;membrane-bounded organelle;nucleus;intracellular organelle;cell;organelle;intracellular;	XRI1-like protein
Cotton_A_39510	AT1G67900	NPY8	response to stimulus;protein modification process;cellular protein modification process;macromolecule modification;response to abiotic stimulus;protein metabolic process;metabolic process;primary metabolic process;macromolecule metabolic process;cellular protein metabolic process;cellular macromolecule metabolic process;response to radiation;response to light stimulus;cellular process;organic sub…	Encodes a gene homologous to the NPY family based on deep phylogeny.
Cotton_A_39767	AT5G57770	FL8	intracellular membrane-bounded organelle;intracellular part;cell part;membrane-bounded organelle;nucleus;intracellular organelle;cell;organelle;intracellular;	FORKED-LIKE family member, part of Group 2 (Group 1 consists of FKD1, FL1-FL3; Group 2 consists of FL4 and FL8 and Group 3 consists of FL5- FL7). May coordinate leaf size with vein density, where Group 1 members and Group 3 members have opposing functions.	root and leaf development	Neema Prabhakaran Mariyamma et al., 2018
Cotton_A_40750	AT4G37650	SHR	regionalization;pattern specification process;single-organism process;plant organ development;anatomical structure development;developmental process;system development;phyllome development;single-multicellular organism process;multicellular organismal process;leaf development;single-organism developmental process;multicellular organism development;shoot system development;regulation of hormone le…	Involved in radial organization of the root and shoot axial organs. Essential for normal shoot gravitropism. The protein moves in a highly specific manner from the cells of the stele in which it is synthesized outward. Movement requires sequences within the GRAS and VHIID domains. SHORT-ROOT forms a network in combination with JACKDAW, BLUEJAY AND SCARECROW to regulate tissue patterning through a…	root development	Marcela Hernández-Coronado et al., 2021
