# Supplementary material for: Genome-Wide Investigation and Co-Expression Network Analysis of SBT Family Gene in Gossypium
Source: Int J Mol Sci. 2023 Mar 17;24(6):5760. doi: 10.3390/ijms24065760 (PMC10056545; doi:10.3390/ijms24065760)
Supplement: Supplementary file 1 [file ijms-24-05760-s001.zip › TableS6.xlsx]

## Sheet: Sheet1
ID	Root_CK	Root_PEG	Root_NaCl	Leaf_CK	Leaf_PEG	Leaf_NaCl	Stem_CK	Stem_PEG	Stem_NaCl		Leaf_PEG/CK	Leaf_NaCl/CK	Stem_PEG/CK	Stem_NaCl/CK	Root_PEG/CK	Root_NaCl/CK
Cotton_A_03377	64.8027	31.8935	31.2778	3.87062	3.43386	4.99432	66.2579	43.8203	17.404		-0.172733	0.540457	-0.596493	-1.92867	-1.02279	-1.05091
Cotton_A_34998	10.4651	0.684518	2.96053	0.908499	1.80283	0.265257	12.0964	5.7584	3.53415		0.988707	-2.7648	-1.07084	-1.77514	-3.93435	-1.82166
Cotton_A_03171	106.215	21.4336	37.5622	46.5286	15.0866	20.8277	164.592	113.646	64.0931		-1.62485	0.465236	-0.534347	-1.36065	-2.30904	-1.49963
Cotton_A_15098	11.6725	9.33587	7.01025	5.40036	3.57418	7.09814	39.5564	27.048	20.6883		-0.595443	0.989829	-0.548389	-0.935096	-0.322257	-0.735576
Cotton_A_35816	320.053	233.364	120.315	357.545	23.7568	207.624	983.105	559.242	301.892		-3.91171	3.12756	-0.813873	-1.70331	-0.455729	-1.41149
Cotton_A_08556	17.6303	7.19015	8.21518	8.39337	4.35757	6.28601	75.7233	55.2507	31.3928		-0.945726	0.528621	-0.454745	-1.2703	-1.29396	-1.10169
Cotton_A_39398	26.0605	13.5844	12.6681	10.0593	10.7888	8.17081	62.8166	47.2837	30.0241		0.101004	-0.400983	-0.409803	-1.06502	-0.939914	-1.04066
Cotton_A_26662	3.5073	2.79048	2.1541	0.720386	0.714734	0	5.61721	5.00427	2.62894		-0.0113637	-1.57437	-0.166694	-1.09537	-0.329848	-0.703276
Cotton_A_18889	69.3243	27.0344	19.5272	4.00984	1.83736	2.69782	37.1182	27.8551	21.819		-1.12591	0.55416	-0.414185	-0.766542	-1.35856	-1.82788
Cotton_A_38407	13.9874	0.883753	0.743285	0	0	0	0	0.309791	0		Na	Na	0.368261	Na	-3.98434	-4.23407
Cotton_A_30270	4.85294	2.03719	1.31346	6.53225	2.30736	6.07876	16.1437	13.9869	11.7173		-1.50134	1.39753	-0.206895	-0.462331	-1.25228	-1.88549
Cotton_A_19980	11.0467	5.48341	6.43294	2.47541	2.15801	1.83035	17.661	13.3347	9.17127		-0.197966	-0.237582	-0.405382	-0.945374	-1.01047	-0.780065
Cotton_A_26205	103.509	19.5457	14.6577	0	5.6175	17.1426	192.241	113.699	49.387		4.54882	1.60959	-0.757696	-1.96071	-2.40483	-2.82003
Cotton_A_27340	18.8251	3.89324	2.62517	40.7145	5.74816	7.55609	127.32	51.5246	25.152		-2.82437	0.39454	-1.30513	-2.33971	-2.27361	-2.84217
Cotton_A_07447	4.88761	3.23347	3.8806	3.39294	1.68425	3.23738	12.4059	13.0961	8.81665		-1.01043	0.94272	0.0781108	-0.492724	-0.596046	-0.332849
Cotton_A_22275	1.75854	2.15053	1.52857	1.69642	0.69696	0.75027	5.59014	5.35649	3.85178		-1.28335	0.106334	-0.0615965	-0.537359	0.290314	-0.202196
Cotton_A_05085	4.49571	1.32068	2.40453	0.909734	0.774191	1.89428	6.63082	7.99456	4.7287		-0.232755	1.29089	0.269831	-0.487744	-1.76727	-0.902794
Cotton_A_11726	1.93397	1.79403	1.24917	0.895317	0.701819	0.659243	4.16675	4.60833	4.11043		-0.3513	-0.0902887	0.145321	-0.0196332	-0.108361	-0.630596
Cotton_A_13822	103.557	26.6339	29.7205	9.43152	0	0	11.6921	2.64975	1.80478		-5.29638	Na	-2.14161	-2.69564	-1.95909	-1.80089
Cotton_A_00476	17.1996	13.203	7.25105	27.0231	7.10385	15.5257	53.9867	48.3842	20.6909		-1.92752	1.12799	-0.158068	-1.38361	-0.381509	-1.24611
Cotton_A_35549	47.6136	33.9895	43.9589	54.3572	16.0218	45.5428	141.089	128.283	112.222		-1.76243	1.50719	-0.137276	-0.33025	-0.486285	-0.115218
Cotton_A_32578	17.5131	9.63806	6.66788	5.48058	3.24532	2.9159	28.5959	20.4531	14.5432		-0.755968	-0.154419	-0.483489	-0.975464	-0.86162	-1.39313
Cotton_A_17149	1.01715	0.635626	0.741453	1.17519	0.708465	0.880728	4.49608	4.02822	1.8913		-0.730126	0.314	-0.158525	-1.24929	-0.678282	-0.456105
Cotton_A_12374	16.6653	10.1012	9.68701	6.51503	5.28129	8.33023	12.4689	6.28494	8.15287		-0.302881	0.657466	-0.988363	-0.612954	-0.722321	-0.782724
Cotton_A_18490	18.0714	6.81317	20.3178	13.1399	5.28649	15.7531	56.183	53.4852	31.3344		-1.31357	1.57525	-0.0709939	-0.842386	-1.40731	0.169036
Cotton_A_26953	20.0628	10.9005	5.52959	0.950056	0.290223	1.19312	25.6833	12.015	8.69383		-1.71085	2.03951	-1.09599	-1.56277	-0.880129	-1.85928
Cotton_A_30387	27.8093	10.7029	4.32971	9.65513	3.68571	6.24047	20.9743	7.09996	3.51346		-1.38935	0.759712	-1.56274	-2.57766	-1.37757	-2.68323
Cotton_A_38327	46.2915	13.4551	26.4684	15.2354	5.96837	10.757	26.0774	26.0923	16.5481		-1.35202	0.849867	0.000824086	-0.656134	-1.78259	-0.806476
Cotton_A_16190	20.7271	21.3108	16.1563	4.06531	6.77486	10.8359	58.3866	64.63	58.0625		0.736826	0.677556	0.146567	-0.00803061	0.0400665	-0.359421
Cotton_A_29964	13.4856	5.24788	4.134	13.2377	3.34758	6.06474	44.8945	22.8358	15.8496		-1.98346	0.857327	-0.975241	-1.50209	-1.36161	-1.70581
Cotton_A_07778	53.9319	53.6659	50.224	39.5661	25.6545	22.6235	88.2343	71.9316	64.5135		-0.625053	-0.18139	-0.294714	-0.451739	-0.00713319	-0.102762
Cotton_A_18279	7.88064	4.31127	3.14337	1.97444	2.06885	2.3033	11.7782	13.4766	10.89		0.0673855	0.154873	0.194337	-0.113115	-0.8702	-1.326
Cotton_A_38225	0.653125	0.417338	0.106119	0.351161	0.0871541	0.204781	1.75904	0.394646	0.304125		-2.01049	1.23244	-2.15616	-2.53205	-0.646143	-2.62168
Cotton_A_18959	347.471	166.953	238.173	190.91	79.2143	122.541	133.97	133.231	181.778		-1.26906	0.629432	-0.00798017	0.440268	-1.05745	-0.544883
Cotton_A_31895	262.676	117.097	101.943	50.6194	28.0584	25.689	724.143	500.861	259.921		-0.851258	-0.127282	-0.531864	-1.4782	-1.16558	-1.36552
Cotton_A_11521	68.5907	56.2515	67.3203	34.6379	54.397	22.8543	131.195	150.242	119.395		0.651176	-1.25106	0.195575	-0.13597	-0.286121	-0.0269714
Cotton_A_05360	4.13432	1.43062	1.99039	0	0	0	3.04404	0.53869	1.29229		Na	Na	-2.49846	-1.23606	-1.53101	-1.0546
Cotton_A_29288	7.19484	1.17769	1.7611	0.118392	0.470188	0	4.08989	2.47118	1.16249		1.98967	-0.970203	-0.726862	-1.81484	-2.611	-2.03049
Cotton_A_15371	11.3521	5.85592	2.63794	3.96709	0.381069	1.94105	13.9154	11.7019	6.79395		-3.37996	2.34871	-0.24994	-1.03436	-0.954991	-2.10548
Cotton_A_25443	10.2479	2.02947	2.93233	1.10509	1.91985	2.14821	38.2788	26.8315	16.3223		0.79683	0.162141	-0.512618	-1.2297	-2.33615	-1.80521
Cotton_A_38228	0.599006	0.974639	0.162145	0.805291	0.399739	0.751321	2.28962	0.977051	0.92999		-1.01045	0.910371	-1.2286	-1.29982	0.702297	-1.88529
Cotton_A_33187	16.6404	2.6267	7.74899	22.9376	3.38897	4.72918	40.1592	23.2825	11.7622		-2.7588	0.480743	-0.786485	-1.77157	-2.66337	-1.10261
Cotton_A_01650	37.8318	33.9668	20.1012	18.5956	21.7837	18.4601	61.0509	48.6668	31.9978		0.228288	-0.238839	-0.327075	-0.93204	-0.155474	-0.912318
Cotton_A_20043	21.6559	20.5131	19.4527	13.5039	6.57791	16.4848	64.4138	77.5449	67.2499		-1.03767	1.32544	0.267662	0.0621623	-0.0782146	-0.15479
Cotton_A_12800	104.855	39.7614	122.037	21.5737	7.43712	16.4294	133.371	89.7362	58.7422		-1.53646	1.14346	-0.571683	-1.18298	-1.39896	0.218923
Cotton_A_06848	2.50509	3.10439	3.57081	1.21639	1.64655	3.09601	5.5794	7.11675	5.36147		0.43684	0.910964	0.351109	-0.0574814	0.309447	0.511389
Cotton_A_21031	2.88948	6.25895	5.50788	3.54457	0.878484	6.74117	21.7471	17.6471	15.0228		-2.01252	2.93991	-0.301392	-0.533669	1.11511	0.930687
Cotton_A_32092	5.47317	3.16576	3.90351	7.43016	0	1.45182	17.9406	17.1644	10.6503		-4.95229	2.59676	-0.0638087	-0.752334	-0.789825	-0.487605
Cotton_A_20534	0.829743	0.491378	0.633547	0.142336	0	0	1.84347	2.37402	1.39606		0.753734	Na	0.364908	-0.401063	-0.755831	-0.389213
Cotton_A_08461	3.29356	1.33048	1.34775	0.882758	0.437949	1.54635	5.73219	5.99293	2.92552		-1.01126	1.82003	0.0641751	-0.970393	-1.3077	-1.28909
Cotton_A_05341	1.10747	0.796735	0.530595	1.40465	1.39446	1.02391	3.91529	4.85415	3.244		-0.0105041	-0.445618	0.3101	-0.271345	-0.475096	-1.06158
Cotton_A_00295	6.59107	3.41689	3.83744	2.79559	0.462431	2.53763	29.5826	22.7687	18.9039		-2.59584	2.45617	-0.377697	-0.646065	-0.947829	-0.780368
Cotton_A_14287	33.4763	21.1587	13.1897	17.9159	23.4993	36.432	84.4862	87.6777	75.4719		0.391377	0.632588	0.0534942	-0.162776	-0.661889	-1.34373
Cotton_A_29605	12.683	7.42715	5.28584	3.05775	2.64831	2.19998	27.3533	24.2753	16.8708		-0.207398	-0.267582	-0.172226	-0.697187	-0.772015	-1.26269
Cotton_A_07957	71.7821	61.4652	43.9324	36.5433	37.7825	39.0933	201.522	243.169	154.394		0.0481112	0.0492032	0.271022	-0.384321	-0.223854	-0.708339
Cotton_A_11088	14.3986	4.85868	9.71139	9.58888	1.95853	5.62194	20.9068	21.1968	10.5078		-2.29159	1.5213	0.0198742	-0.992512	-1.56729	-0.568179
Cotton_A_38290	26.0744	22.9987	13.4619	19.0613	17.6477	25.8049	71.076	82.847	64.8825		-0.111166	0.548165	0.221087	-0.131533	-0.181082	-0.953752
Cotton_A_08404	43.3595	46.3022	34.2068	22.0025	24.4023	34.3448	155.526	156.481	155.254		0.14935	0.493075	0.00883171	-0.00252534	0.0947326	-0.342065
Cotton_A_20282	57.4572	29.9711	36.3478	31.533	21.9331	43.5208	157.508	148.815	147.655		-0.523753	0.988595	-0.0819052	-0.0931949	-0.938916	-0.66062
Cotton_A_29283	0.937082	0	0.236085	0	0	0	0.375426	0	0		Na	Na	-0.645494	-0.645494	-1.96514	-1.98887
Cotton_A_22606	4.79078	6.07936	1.76788	13.0304	0.215489	3.80416	16.4975	6.09293	4.38115		-5.91812	4.14189	-1.43704	-1.91287	0.343659	-1.43824
Cotton_A_23557	11.3429	7.12731	4.72812	6.92173	2.31635	4.53488	17.3867	9.81908	5.56875		-1.57928	0.969211	-0.824324	-1.64256	-0.67036	-1.26245
Cotton_A_08904	128.419	11.5924	2.80847	0.222491	1.98684	0	92.6139	124.776	39.7518		3.15866	-3.04937	0.43004	-1.22021	-3.46961	-5.51493
Cotton_A_11064	21.7675	15.6214	15.1004	5.11001	3.94258	3.98083	17.7361	21.7846	17.82		-0.374186	0.0139292	0.29662	0.00680853	-0.478652	-0.527589
Cotton_A_31365	11.5737	7.95776	5.33626	3.22963	5.60388	1.88918	11.0809	9.95983	8.12418		0.795057	-1.56867	-0.153882	-0.447781	-0.540416	-1.11695
Cotton_A_37478	4.18225	3.57268	1.71649	2.57356	1.0086	2.0533	10.9359	8.75915	5.1629		-1.35141	1.02559	-0.320209	-1.08282	-0.227273	-1.28482
Cotton_A_18254	24.6511	23.7663	16.8694	5.15363	5.8322	10.3696	19.4736	9.58293	9.27247		0.178451	0.830248	-1.02298	-1.07049	-0.0527347	-0.547243
Cotton_A_17093	12.7527	8.50304	8.25987	5.50182	4.46894	3.30549	26.3973	27.4244	18.8199		-0.299976	-0.435069	0.0550697	-0.488131	-0.584752	-0.626612
Cotton_A_05112	118.423	6.06421	41.705	28.5197	7.73096	16.2511	130.553	78.7862	60.2117		-1.88324	1.07182	-0.728621	-1.11652	-4.28749	-1.50566
Cotton_A_24404	8.81102	4.35209	3.87296	0	0	0	0	0	0		Na	Na	Na	Na	-1.0176	-1.18587
Cotton_A_00511	34.9519	8.03342	7.41914	10.4567	5.6784	6.98397	122.529	88.1135	34.5722		-0.880871	0.298563	-0.475688	-1.82544	-2.12128	-2.23605
Cotton_A_13561	11.2715	4.88637	6.74401	2.84999	0.0912674	1.50121	7.31	6.86187	7.11241		-4.96471	4.03988	-0.0912696	-0.0395329	-1.20584	-0.741001
Cotton_A_32495	10.6531	5.01685	2.50137	0.807407	4.00277	1.41689	8.70645	6.82433	4.41027		2.30963	-1.49827	-0.351397	-0.981218	-1.08642	-2.09048
Cotton_A_13982	374.492	237.79	238.661	54.8295	29.0316	56.2325	236.53	213.748	244.89		-0.917328	0.95378	-0.146112	0.0501107	-0.655247	-0.649972
Cotton_A_21544	15.2086	7.18858	7.01862	7.01848	6.02077	5.30271	33.895	25.4013	26.1723		-0.221211	-0.183218	-0.41617	-0.373032	-1.08111	-1.11563
Cotton_A_06486	12.0245	2.78831	1.80029	3.66014	1.73568	3.50315	45.4261	25.4723	11.7069		-1.0764	1.01315	-0.834592	-1.95616	-2.10851	-2.73968
Cotton_A_27115	0.499755	0.546777	0.537121	0.140512	0	0.0819263	2.13297	1.29373	0.446305		0.772341	-1.55064	-0.721327	-2.25676	0.129732	0.104026
Cotton_A_23546	7.73605	3.24666	5.31786	5.49757	3.36555	4.3816	21.0268	19.0742	8.99291		-0.707952	0.380615	-0.140607	-1.22537	-1.25264	-0.540751
Cotton_A_32062	159.128	32.4066	57.063	52.058	11.2104	11.2732	163.591	122.19	76.3885		-2.21528	0.00805934	-0.420967	-1.09867	-2.29583	-1.47956
Cotton_A_33908	18.3529	26.7455	14.687	24.6236	9.70237	27.2878	43.4308	44.137	23.8012		-1.34363	1.49185	0.02327	-0.867684	0.543288	-0.321468
Cotton_A_16389	1.20995	0.451911	1.32446	0	1.04861	0	1.38914	0.243288	0		2.12737	-2.12737	-2.51345	-2.53309	-1.42084	0.130457
Cotton_A_07609	12.0804	3.86115	4.32513	1.68814	0	0.694982	9.63149	7.23588	1.94907		-2.81433	1.53394	-0.412591	-2.30497	-1.64557	-1.48185
Cotton_A_27100	4.19385	1.82049	3.54331	1.17477	0.466232	1.37211	5.1899	4.78873	4.46797		-1.33326	1.55728	-0.116064	-0.216087	-1.20395	-0.243178
Cotton_A_16393	76.4596	60.0881	24.3864	25.7234	3.55034	4.97111	83.3709	44.6034	26.331		-2.85705	0.485611	-0.90239	-1.66278	-0.347618	-1.64862
Cotton_A_21234	2.61628	1.61116	0.799707	0	0.585847	0	1.53217	2.22395	1.24805		1.28749	-1.28749	0.537548	-0.295901	-0.699417	-1.70997
Cotton_A_09118	61.3611	18.5291	27.2896	14.2038	7.238	4.03366	44.9494	27.4112	20.142		-0.972614	-0.843502	-0.713536	-1.15809	-1.72753	-1.16897
Cotton_A_19300	5.06525	0.529813	0.760472	1.03753	0.280904	0.110014	3.96358	1.65416	0.653439		-1.885	-1.35239	-1.26071	-2.60068	-3.25708	-2.73567
Cotton_A_14201	34.1292	6.64343	8.8535	9.5077	5.45086	2.22045	39.7738	35.9375	15.7109		-0.802613	-1.29563	-0.146328	-1.34005	-2.36101	-1.94669
Cotton_A_03565	7.75588	3.56767	0.292053	1.07946	0	2.10018	4.19969	1.54386	0.829987		-2.1692	3.12941	-1.44374	-2.33912	-1.12031	-4.73099
Cotton_A_37268	12.8328	3.30321	3.88598	1.7817	1.66795	1.12765	13.3414	9.18203	6.67508		-0.0951784	-0.564757	-0.539025	-0.999053	-1.9579	-1.72349
Cotton_A_04561	1.15791	0.356939	0.665859	0.275341	0	0.214097	0.711966	0.3714	0.476896		-0.198185	-0.16477	-0.938835	-0.578134	-1.69777	-0.798235
Cotton_A_04020	33.2508	16.9529	13.2115	4.13387	0.512905	1.50729	51.5088	29.3883	9.54188		-3.01073	1.55519	-0.809577	-2.43247	-0.971857	-1.33159
Cotton_A_39767	8.25466	3.0222	3.03249	2.70711	0.790215	1.11513	6.81003	2.58644	1.0104		-1.77644	0.496895	-1.39669	-2.75273	-1.44961	-1.44471
Cotton_A_16216	45.1248	35.0475	29.0555	33.1578	8.04024	26.3951	53.493	41.1978	22.5017		-2.04404	1.71496	-0.376783	-1.24932	-0.364609	-0.635109
Cotton_A_12671	36.7554	25.6521	27.0372	16.7255	8.40665	15.1886	26.2218	26.1967	19.309		-0.992446	0.853386	-0.00138164	-0.441493	-0.518879	-0.44301
Cotton_A_02966	35.0327	6.48306	24.2025	6.43874	4.26045	3.33938	21.6824	27.6713	15.6023		-0.595773	-0.351426	0.351866	-0.474766	-2.43396	-0.533546
Cotton_A_31015	3.89858	3.06501	3.99681	2.42947	4.53413	2.94712	11.9381	13.5488	8.13466		0.900184	-0.62152	0.182592	-0.553419	-0.347057	0.0359003
Cotton_A_13605	24.0421	14.7718	13.1618	7.87693	4.13386	4.13284	63.5346	43.3322	22.294		-0.930144	-0.000356018	-0.552103	-1.51089	-0.702717	-0.869206
Cotton_A_39481	12.558	3.81079	2.63356	7.24978	7.45846	5.64692	32.6594	17.7863	13.1462		0.0409406	-0.401414	-0.876732	-1.31285	-1.72044	-2.25352
Cotton_A_17768	28.6338	20.7934	22.9323	6.28519	5.67916	6.58808	22.216	16.9059	20.7178		-0.146279	0.214181	-0.394072	-0.100728	-0.461593	-0.320338
Cotton_A_09270	5.1957	3.84582	3.72396	2.00858	0.854637	0.920174	2.91943	4.63982	3.68695		-1.23279	0.106595	0.668382	0.336741	-0.434027	-0.480481
Cotton_A_30823	167.583	118.672	61.2809	108.932	96.7748	112.766	144.8	99.8941	87.4558		-0.170724	0.220629	-0.53559	-0.727436	-0.497896	-1.45137
Cotton_A_30234	9.91964	4.55737	4.96945	4.14055	2.64237	0.919935	3.95213	4.43412	5.69115		-0.64799	-1.52223	0.166017	0.52609	-1.12209	-0.997202
Cotton_A_08661	9.21689	4.52453	3.54168	3.17865	4.57434	2.04042	40.8833	22.9455	17.6936		0.525149	-1.1647	-0.8333	-1.20828	-1.02651	-1.37985
Cotton_A_04405	0.675986	0.574533	1.07213	0.664846	0.94287	0.886251	5.83342	5.68061	4.11242		0.504039	-0.0893435	-0.0382961	-0.504354	-0.234604	0.665415
Cotton_A_27181	114.922	220.251	70.5209	89.1641	64.4575	187.774	651.605	439.813	242.985		-0.468115	1.54258	-0.567107	-1.42313	0.938494	-0.704532
Cotton_A_15722	12.3868	3.90742	7.36741	10.6901	7.27066	8.22613	21.9117	21.9951	12.7204		-0.556117	0.178128	0.00548074	-0.784557	-1.66452	-0.749574
Cotton_A_18306	18.7652	5.42591	9.95097	0	0	0.154391	0	0	0		Na	-0.636446	Na	Na	-1.79012	-0.915151
Cotton_A_29997	2444.5	1559.92	2734.57	8055.18	2280.91	3430.5	10883.8	6151.09	2707.26		-1.82031	0.588809	-0.823268	-2.00728	-0.648067	0.161775
Cotton_A_14208	5.45764	0.449125	3.16895	2.25691	0.689165	0.4053	16.7696	7.99523	1.80221		-1.71143	-0.765859	-1.06864	-3.21801	-3.60309	-0.784272
Cotton_A_31319	20.1459	11.7991	6.22037	7.67352	5.84627	4.47491	39.1035	35.6207	22.2549		-0.392372	-0.385658	-0.134582	-0.813175	-0.771809	-1.69541
Cotton_A_19061	1.73891	0.917062	0	1.06868	0	0	2.55658	0.974111	0.614847		-2.15472	Na	-1.39206	-2.05592	-0.923092	-2.85708
Cotton_A_28624	0.454724	0.299866	0	0.349379	0	0	0.911574	0.477524	0.603082		-0.541758	Na	-0.932787	-0.596006	-0.600673	-0.921957
Cotton_A_36293	13.2033	4.99834	5.62009	2.35988	1.92249	3.17494	26.4137	26.2127	15.0281		-0.295737	0.723753	-0.0110204	-0.813624	-1.40138	-1.23223
Cotton_A_11342	543.2	593.001	299.897	144.359	133.888	110.559	1312.57	1416.92	1296.61		-0.108634	-0.27621	0.110364	-0.0176498	0.126551	-0.857016
Cotton_A_31578	22.3521	11.3389	5.86387	23.512	3.62967	6.70884	48.8897	32.2413	7.33226		-2.69549	0.886225	-0.600621	-2.7372	-0.97913	-1.93049
Cotton_A_00329	51.136	29.7816	23.7786	49.8203	14.1103	28.4563	137.101	97.0636	39.8867		-1.81999	1.012	-0.498237	-1.78126	-0.779918	-1.10468
Cotton_A_36511	1.29414	1.0452	0.787517	0.0930333	0.461785	0.108511	6.67588	5.35458	1.93359		2.3114	-2.08938	-0.318185	-1.78768	-0.308215	-0.716611
Cotton_A_16579	3.50726	2.36409	3.40211	0.766297	0.869346	2.29867	18.9771	8.91698	3.9176		0.182027	1.4028	-1.08963	-2.27622	-0.569059	-0.0439146
Cotton_A_37190	12.8077	4.70127	6.42475	13.1172	7.60786	7.75494	24.6248	19.5332	11.2988		-0.785897	0.0276249	-0.334184	-1.12394	-1.44589	-0.995299
Cotton_A_33239	1.97816	2.96793	1.27953	4.13265	0.390565	1.83812	8.68231	6.22706	2.26918		-3.40343	2.2346	-0.479528	-1.93591	0.585298	-0.628545
Cotton_A_32314	29.2386	10.1115	11.0907	20.5536	10.8015	11.9244	83.3252	55.549	27.9777		-0.928159	0.142685	-0.584992	-1.57448	-1.53188	-1.39852
Cotton_A_12733	180.332	117.303	25.056	98.2384	52.7634	88.5168	264.406	158.171	81.7136		-0.89675	0.746414	-0.74127	-1.69411	-0.620416	-2.84743
Cotton_A_33724	88.5983	34.2661	74.9016	94.2484	37.8348	36.7855	245.623	137.161	71.6618		-1.31675	-0.0405766	-0.840575	-1.77717	-1.3705	-0.242282
Cotton_A_03588	9.92267	6.23073	3.85905	3.30169	2.55833	2.72354	31.2221	21.6037	13.9963		-0.368002	0.0902807	-0.531289	-1.15752	-0.671327	-1.36248
Cotton_A_09634	3.01918	0.501584	0.472891	1.35795	0.577516	0.905955	11.0749	8.85562	2.23697		-1.2335	0.649578	-0.322628	-2.30768	-2.58959	-2.67458
Cotton_A_29822	2.77362	2.01711	1.41671	2.46617	1.4172	1.21158	11.4265	5.96431	5.01832		-0.799229	-0.226154	-0.937956	-1.18711	-0.45948	-0.969226
Cotton_A_23892	1.07837	0.763343	1.08266	0.664759	0.219864	1.55265	8.20183	6.21815	3.83136		-1.59622	2.82005	-0.39946	-1.09809	-0.498449	0.00572798
Cotton_A_22470	0.965505	0.980207	0.574435	3.54914	2.53631	3.14759	18.5704	19.6463	6.88027		-0.484738	0.311517	0.0812527	-1.43247	0.0218027	-0.74914
Cotton_A_12092	8.50176	8.79364	12.2231	4.64928	4.47896	2.39341	38.1585	30.8736	17.2792		-0.0538435	-0.904096	-0.305631	-1.14297	0.0486989	0.523777
Cotton_A_01463	43.7104	12.4653	18.2615	4.77164	2.13141	3.34015	88.7666	52.2073	16.0412		-1.16268	0.648105	-0.765765	-2.46823	-1.81006	-1.25917
Cotton_A_40750	12.5198	6.42188	3.20674	4.17206	3.03672	1.94733	23.6825	15.1057	9.86949		-0.458246	-0.641017	-0.648728	-1.26277	-0.963144	-1.96503
Cotton_A_10342	5.92343	4.55197	2.75394	0.443071	0	0	4.05945	2.83976	2.03699		-0.884503	Na	-0.515515	-0.994845	-0.379942	-1.10494
Cotton_A_11140	65.3921	7.70233	14.8052	8.68494	0	5.56309	29.8157	39.3824	12.647		-5.17741	4.53478	0.401479	-1.23728	-3.08575	-2.14301
Cotton_A_17525	19.047	14.1416	17.9657	12.2139	10.42	12.9107	44.1714	39.9078	22.2004		-0.229169	0.309212	-0.146442	-0.992527	-0.429618	-0.0843186
Cotton_A_19655	22.187	21.6948	17.9895	12.8466	2.70206	4.09833	54.4168	36.6112	11.6415		-2.24925	0.600976	-0.571767	-2.22478	-0.0323653	-0.30256
Cotton_A_16793	11.1935	6.31304	9.03832	10.3471	6.38771	8.82267	21.0745	17.0412	13.4042		-0.695856	0.465917	-0.306471	-0.652813	-0.826254	-0.308535
Cotton_A_39510	9.49	5.96168	4.55188	10.807	3.44837	2.92623	28.947	23.737	9.58117		-1.64798	-0.236871	-0.286276	-1.59514	-0.670689	-1.05995
Cotton_A_25640	3.2544	3.47671	1.27953	2.36152	2.34339	3.21671	8.93767	5.78227	4.31145		-0.0111187	0.456989	-0.628263	-1.05173	0.0953311	-1.34678
Cotton_A_19911	21.5666	24.8074	12.8512	21.538	13.6183	23.5874	51.5567	35.2279	21.5401		-0.661338	0.79247	-0.549441	-1.25913	0.201972	-0.746896
Cotton_A_24859	1280.68	1905.67	1059.51	2806.47	2848.79	3337.78	9086.17	4596.81	3610.75		0.0215926	0.22854	-0.983039	-1.33137	0.573388	-0.273513
Cotton_A_06179	5.09483	3.47719	8.67868	4.71075	0.667726	2.35778	17.9188	8.63131	8.53272		-2.81863	1.8201	-1.05382	-1.0704	-0.551112	0.768442
Cotton_A_14274	9.83231	4.36147	7.20746	0.40383	0.901985	0.588813	6.46309	9.08282	9.32475		1.15936	-0.615294	0.490916	0.528841	-1.17272	-0.448039
Cotton_A_04455	1.82148	1.26566	1.27837	0.351717	0.698254	0.273552	0.758551	0.422254	0.541312		0.989337	-1.35194	-0.845135	-0.486786	-0.525221	-0.510806
Cotton_A_14511	0.142393	0.126462	0.0593175	0	0	0	0.379651	0.264295	0.169089		Na	Na	-0.522525	-1.16689	-0.171174	-1.26335
Na:The denominator is 0 when you calculate the ratio

## Sheet: Sheet3
ID	naclroot
Cotton_A_03377	down
Cotton_A_34998	down
Cotton_A_03171	down
Cotton_A_15098
Cotton_A_35816	down
Cotton_A_08556	down
Cotton_A_39398	down
Cotton_A_26662
Cotton_A_18889	down
Cotton_A_38407	down
Cotton_A_30270	down
Cotton_A_19980
Cotton_A_26205	down
Cotton_A_27340	down
Cotton_A_07447
Cotton_A_22275
Cotton_A_05085
Cotton_A_11726
Cotton_A_13822	down
Cotton_A_00476	down
Cotton_A_35549
Cotton_A_32578	down
Cotton_A_17149
Cotton_A_12374
Cotton_A_18490
Cotton_A_26953	down
Cotton_A_30387	down
Cotton_A_38327
Cotton_A_16190
Cotton_A_29964	down
Cotton_A_07778
Cotton_A_18279	down
Cotton_A_38225	down
Cotton_A_18959
Cotton_A_31895	down
Cotton_A_11521
Cotton_A_05360	down
Cotton_A_29288	down
Cotton_A_15371	down
Cotton_A_25443	down
Cotton_A_38228	down
Cotton_A_33187	down
Cotton_A_01650
Cotton_A_20043
Cotton_A_12800
Cotton_A_06848
Cotton_A_21031
Cotton_A_32092
Cotton_A_20534
Cotton_A_08461	down
Cotton_A_05341	down
Cotton_A_00295
Cotton_A_14287	down
Cotton_A_29605	down
Cotton_A_07957
Cotton_A_11088
Cotton_A_38290
Cotton_A_08404
Cotton_A_20282
Cotton_A_29283	down
Cotton_A_22606	down
Cotton_A_23557	down
Cotton_A_08904	down
Cotton_A_11064
Cotton_A_31365	down
Cotton_A_37478	down
Cotton_A_18254
Cotton_A_17093
Cotton_A_05112	down
Cotton_A_24404	down
Cotton_A_00511	down
Cotton_A_13561
Cotton_A_32495	down
Cotton_A_13982
Cotton_A_21544	down
Cotton_A_06486	down
Cotton_A_27115
Cotton_A_23546
Cotton_A_32062	down
Cotton_A_33908
Cotton_A_16389
Cotton_A_07609	down
Cotton_A_27100
Cotton_A_16393	down
Cotton_A_21234	down
Cotton_A_09118	down
Cotton_A_19300	down
Cotton_A_14201	down
Cotton_A_03565	down
Cotton_A_37268	down
Cotton_A_04561
Cotton_A_04020	down
Cotton_A_39767	down
Cotton_A_16216
Cotton_A_12671
Cotton_A_02966
Cotton_A_31015
Cotton_A_13605
Cotton_A_39481	down
Cotton_A_17768
Cotton_A_09270
Cotton_A_30823	down
Cotton_A_30234
Cotton_A_08661	down
Cotton_A_04405
Cotton_A_27181
Cotton_A_15722
Cotton_A_18306
Cotton_A_29997
Cotton_A_14208
Cotton_A_31319	down
Cotton_A_19061	down
Cotton_A_28624
Cotton_A_36293	down
Cotton_A_11342
Cotton_A_31578	down
Cotton_A_00329	down
Cotton_A_36511
Cotton_A_16579
Cotton_A_37190
Cotton_A_33239
Cotton_A_32314	down
Cotton_A_12733	down
Cotton_A_33724
Cotton_A_03588	down
Cotton_A_09634	down
Cotton_A_29822
Cotton_A_23892
Cotton_A_22470
Cotton_A_12092
Cotton_A_01463	down
Cotton_A_40750	down
Cotton_A_10342	down
Cotton_A_11140	down
Cotton_A_17525
Cotton_A_19655
Cotton_A_16793
Cotton_A_39510	down
Cotton_A_25640	down
Cotton_A_19911
Cotton_A_24859
Cotton_A_06179
Cotton_A_14274
Cotton_A_04455
Cotton_A_14511	down

## Sheet: Sheet2
ID	Leaf_PEG/CK	Leaf_NaCl/CK	Stem_PEG/CK	Stem_NaCl/CK	Root_PEG/CK	Root_NaCl/CK			GA	AT		hirsutum	arabidopsis
Cotton_A_03377	-0.172733	0.540457	-0.596493	-1.92867	-1.02279	-1.05091			Cotton_A_15098	AT1G78950		Gh_Sca005023G04	AT2G05920
Cotton_A_34998	0.988707	-2.7648	-1.07084	-1.77514	-3.93435	-1.82166			Cotton_A_38228	AT3G47570		Gh_A13G1684	AT2G05920
Cotton_A_03171	-1.62485	0.465236	-0.534347	-1.36065	-2.30904	-1.49963			Cotton_A_38225	AT3G47570		Gh_D10G0493	AT3G14240
Cotton_A_15098	-0.595443	0.989829	-0.548389	-0.935096	-0.322257	-0.735576			Cotton_A_04455	AT2G14830		Gh_A10G0470	AT3G14240
Cotton_A_35816	-3.91171	3.12756	-0.813873	-1.70331	-0.455729	-1.41149			Cotton_A_00329	AT2G38120		Gh_A09G2484	AT5G22870
Cotton_A_08556	-0.945726	0.528621	-0.454745	-1.2703	-1.29396	-1.10169			Cotton_A_03171	AT2G05920		Gh_D12G1963	AT5G61480
Cotton_A_39398	0.101004	-0.400983	-0.409803	-1.06502	-0.939914	-1.04066			Cotton_A_08661	AT1G46264		Gh_D05G3705	AT5G59810
Cotton_A_26662	-0.0113637	-1.57437	-0.166694	-1.09537	-0.329848	-0.703276			Cotton_A_05085	AT5G48740		Gh_A04G0029	AT5G59810
Cotton_A_18889	-1.12591	0.55416	-0.414185	-0.766542	-1.35856	-1.82788			Cotton_A_31365	AT1G54400		Gh_D06G2295	AT1G75500
Cotton_A_38407	0	0	0.368261	0	-3.98434	-4.23407			Cotton_A_08556	AT3G14240		Gh_A06G1836	AT1G75500
Cotton_A_30270	-1.50134	1.39753	-0.206895	-0.462331	-1.25228	-1.88549			Cotton_A_14201	AT5G25830		Gh_D10G1132	AT5G01890
Cotton_A_19980	-0.197966	-0.237582	-0.405382	-0.945374	-1.01047	-0.780065			Cotton_A_34998	AT5G25830		Gh_A10G1339	AT5G01890
Cotton_A_26205	4.54882	1.60959	-0.757696	-1.96071	-2.40483	-2.82003			Cotton_A_13561	AT1G31770		Gh_D05G1339	AT3G14067
Cotton_A_27340	-2.82437	0.39454	-1.30513	-2.33971	-2.27361	-2.84217			Cotton_A_15371	AT2G41370		Gh_A05G1162	AT3G14067
Cotton_A_07447	-1.01043	0.94272	0.0781108	-0.492724	-0.596046	-0.332849			Cotton_A_21544	AT2G23360		Gh_D12G1031	AT1G01900
Cotton_A_22275	-1.28335	0.106334	-0.0615965	-0.537359	0.290314	-0.202196			Cotton_A_29605	AT2G23360		Gh_A12G0941	AT1G01900
Cotton_A_05085	-0.232755	1.29089	0.269831	-0.487744	-1.76727	-0.902794			Cotton_A_14287	AT5G36890		Gh_A09G2137	AT3G17350
Cotton_A_11726	-0.3513	-0.0902887	0.145321	-0.0196332	-0.108361	-0.630596			Cotton_A_26662	AT1G13920		Gh_A11G1337	AT3G25500
Cotton_A_13822	-5.29638	0	-2.14161	-2.69564	-1.95909	-1.80089			Cotton_A_32495	AT5G22870		Gh_A07G0816	AT3G25500
Cotton_A_00476	-1.92752	1.12799	-0.158068	-1.38361	-0.381509	-1.24611			Cotton_A_24404	AT4G00080		Gh_D03G1443	AT4G00430
Cotton_A_35549	-1.76243	1.50719	-0.137276	-0.33025	-0.486285	-0.115218			Cotton_A_33187	AT4G02100		Gh_A03G0138	AT4G00430
Cotton_A_32578	-0.755968	-0.154419	-0.483489	-0.975464	-0.86162	-1.39313			Cotton_A_30387	AT1G24530		Gh_D06G1720	AT4G17220
Cotton_A_17149	-0.730126	0.314	-0.158525	-1.24929	-0.678282	-0.456105			Cotton_A_27181	AT2G38905		Gh_D05G1682	AT4G17220
Cotton_A_12374	-0.302881	0.657466	-0.988363	-0.612954	-0.722321	-0.782724			Cotton_A_29964	AT3G44716		Gh_A06G1377	AT4G17220
Cotton_A_18490	-1.31357	1.57525	-0.0709939	-0.842386	-1.40731	0.169036			Cotton_A_33724	AT5G66920		Gh_D05G2004	AT5G67360
Cotton_A_26953	-1.71085	2.03951	-1.09599	-1.56277	-0.880129	-1.85928			Cotton_A_12671	AT5G42350		Gh_A05G1808	AT5G67360
Cotton_A_30387	-1.38935	0.759712	-1.56274	-2.57766	-1.37757	-2.68323			Cotton_A_04561	AT5G63800		Gh_Sca005341G01	AT4G12350
Cotton_A_38327	-1.35202	0.849867	0.000824086	-0.656134	-1.78259	-0.806476			Cotton_A_23557	AT4G37250		Gh_Sca005145G01	AT2G36010
Cotton_A_16190	0.736826	0.677556	0.146567	-0.00803061	0.0400665	-0.359421			Cotton_A_03588	AT5G61480		Gh_D13G2031	AT5G20870
Cotton_A_29964	-1.98346	0.857327	-0.975241	-1.50209	-1.36161	-1.70581			Cotton_A_13605	AT5G61480		Gh_D13G1322	AT1G16310
Cotton_A_07778	-0.625053	-0.18139	-0.294714	-0.451739	-0.00713319	-0.102762			Cotton_A_08904	AT2G21250		Gh_D13G0491	AT2G36690
Cotton_A_18279	0.0673855	0.154873	0.194337	-0.113115	-0.8702	-1.326			Cotton_A_09270	AT3G14470		Gh_D12G2750	AT1G64060
Cotton_A_38225	-2.01049	1.23244	-2.15616	-2.53205	-0.646143	-2.62168			Cotton_A_17149	AT3G14470		Gh_D12G2702	AT2G46690
Cotton_A_18959	-1.26906	0.629432	-0.00798017	0.440268	-1.05745	-0.544883			Cotton_A_17525	AT5G45780		Gh_D12G1946	AT4G25130
Cotton_A_31895	-0.851258	-0.127282	-0.531864	-1.4782	-1.16558	-1.36552			Cotton_A_40750	AT4G37650		Gh_D12G0510	AT1G19020
Cotton_A_11521	0.651176	-1.25106	0.195575	-0.13597	-0.286121	-0.0269714			Cotton_A_37190	AT3G30380		Gh_D11G3463	AT4G37000
Cotton_A_05360	0	0	-2.49846	-1.23606	-1.53101	-1.0546			Cotton_A_27115	AT1G47890		Gh_D11G3271	AT2G36870
Cotton_A_29288	1.98967	-0.970203	-0.726862	-1.81484	-2.611	-2.03049			Cotton_A_33908	AT1G67560		Gh_D11G3268	AT2G36830
Cotton_A_15371	-3.37996	2.34871	-0.24994	-1.03436	-0.954991	-2.10548			Cotton_A_30823	AT5G39950		Gh_D11G3137	AT3G20898
Cotton_A_25443	0.79683	0.162141	-0.512618	-1.2297	-2.33615	-1.80521			Cotton_A_25443	AT5G09220		Gh_D11G3027	AT3G04590
Cotton_A_38228	-1.01045	0.910371	-1.2286	-1.29982	0.702297	-1.88529			Cotton_A_14208	AT1G79760		Gh_A11G2664	AT3G04590
Cotton_A_33187	-2.7588	0.480743	-0.786485	-1.77157	-2.66337	-1.10261			Cotton_A_11521	AT3G55430		Gh_D11G2930	AT4G00872
Cotton_A_01650	0.228288	-0.238839	-0.327075	-0.93204	-0.155474	-0.912318			Cotton_A_11140	AT3G24450		Gh_A11G2616	AT4G00872
Cotton_A_20043	-1.03767	1.32544	0.267662	0.0621623	-0.0782146	-0.15479			Cotton_A_39510	AT1G67900		Gh_D11G2524	AT1G08590
Cotton_A_12800	-1.53646	1.14346	-0.571683	-1.18298	-1.39896	0.218923			Cotton_A_29822	AT3G20015		Gh_A11G2215	AT1G08590
Cotton_A_06848	0.43684	0.910964	0.351109	-0.0574814	0.309447	0.511389			Cotton_A_27100	AT5G24620		Gh_D11G2321	AT5G17640
Cotton_A_21031	-2.01252	2.93991	-0.301392	-0.533669	1.11511	0.930687			Cotton_A_20282	AT2G38080		Gh_A11G3221	AT5G17640
Cotton_A_32092	-4.95229	2.59676	-0.0638087	-0.752334	-0.789825	-0.487605			Cotton_A_14511	AT3G24620		Gh_D11G1566	AT4G03965
Cotton_A_20534	0.753734	0	0.364908	-0.401063	-0.755831	-0.389213			Cotton_A_21234	AT3G17380		Gh_D11G1534	AT5G35750
Cotton_A_08461	-1.01126	1.82003	0.0641751	-0.970393	-1.3077	-1.28909			Cotton_A_20043	AT2G29130		Gh_D11G0460	AT2G17820
Cotton_A_05341	-0.0105041	-0.445618	0.3101	-0.271345	-0.475096	-1.06158			Cotton_A_19300	AT4G08850		Gh_D11G0288	AT5G46800
Cotton_A_00295	-2.59584	2.45617	-0.377697	-0.646065	-0.947829	-0.780368			Cotton_A_22606	AT5G10530		Gh_D10G2603	AT3G14170
Cotton_A_14287	0.391377	0.632588	0.0534942	-0.162776	-0.661889	-1.34373			Cotton_A_11064	AT2G27140		Gh_D10G2113	AT2G39200
Cotton_A_29605	-0.207398	-0.267582	-0.172226	-0.697187	-0.772015	-1.26269			Cotton_A_07957	AT5G45440		Gh_D10G1657	AT1G54610
Cotton_A_07957	0.0481112	0.0492032	0.271022	-0.384321	-0.223854	-0.708339			Cotton_A_16579	AT4G18010		Gh_A10G2277	AT1G54610
Cotton_A_11088	-2.29159	1.5213	0.0198742	-0.992512	-1.56729	-0.568179			Cotton_A_39767	AT5G57770		Gh_D10G1286	AT2G43120
Cotton_A_38290	-0.111166	0.548165	0.221087	-0.131533	-0.181082	-0.953752			Cotton_A_07447	AT5G59810		Gh_D10G0960	AT5G65840
Cotton_A_08404	0.14935	0.493075	0.00883171	-0.00252534	0.0947326	-0.342065			Cotton_A_19061	AT1G49230		Gh_D10G0795	AT5G49800
Cotton_A_20282	-0.523753	0.988595	-0.0819052	-0.0931949	-0.938916	-0.66062			Cotton_A_29283	AT4G27220		Gh_D09G2139	AT3G22950
Cotton_A_29283	0	0	-0.645494	-0.645494	-1.96514	-1.98887			Cotton_A_22275	AT4G27220		Gh_D09G2081	AT4G14940
Cotton_A_22606	-5.91812	4.14189	-1.43704	-1.91287	0.343659	-1.43824			Cotton_A_31895	AT1G75500		Gh_D09G2000	AT1G06000
Cotton_A_23557	-1.57928	0.969211	-0.824324	-1.64256	-0.67036	-1.26245			Cotton_A_16393	AT1G75500		Gh_D09G1748	AT5G53350
Cotton_A_08904	3.15866	-3.04937	0.43004	-1.22021	-3.46961	-5.51493			Cotton_A_00295	AT2G38320		Gh_D09G1436	AT3G53950
Cotton_A_11064	-0.374186	0.0139292	0.29662	0.00680853	-0.478652	-0.527589			Cotton_A_19655	AT5G59080		Gh_D09G1203	AT2G42130
Cotton_A_31365	0.795057	-1.56867	-0.153882	-0.447781	-0.540416	-1.11695			Cotton_A_11342	AT2G33790		Gh_D08G2570	AT5G20885
Cotton_A_37478	-1.35141	1.02559	-0.320209	-1.08282	-0.227273	-1.28482			Cotton_A_08404	AT3G01680		Gh_D08G2213	AT5G27670
Cotton_A_18254	0.178451	0.830248	-1.02298	-1.07049	-0.0527347	-0.547243			Cotton_A_16190	AT3G01680		Gh_D08G2109	AT5G60690
Cotton_A_17093	-0.299976	-0.435069	0.0550697	-0.488131	-0.584752	-0.626612			Cotton_A_16216	AT5G51060		Gh_D08G1728	AT1G32450
Cotton_A_05112	-1.88324	1.07182	-0.728621	-1.11652	-4.28749	-1.50566			Cotton_A_18254	AT5G42146		Gh_D08G1682	AT1G32170
Cotton_A_24404	0	0	0	0	-1.0176	-1.18587			Cotton_A_12733	AT3G43660		Gh_A08G1387	AT1G32170
Cotton_A_00511	-0.880871	0.298563	-0.475688	-1.82544	-2.12128	-2.23605			Cotton_A_21031	AT3G01860		Gh_D08G1342	AT3G62280
Cotton_A_13561	-4.96471	4.03988	-0.0912696	-0.0395329	-1.20584	-0.741001			Cotton_A_27340	AT2G17230		Gh_D08G0161	AT3G20830
Cotton_A_32495	2.30963	-1.49827	-0.351397	-0.981218	-1.08642	-2.09048			Cotton_A_09118	AT4G31350		Gh_D07G1810	AT5G38880
Cotton_A_13982	-0.917328	0.95378	-0.146112	0.0501107	-0.655247	-0.649972			Cotton_A_16389	AT2G42140		Gh_D07G1002	AT3G11340
Cotton_A_21544	-0.221211	-0.183218	-0.41617	-0.373032	-1.08111	-1.11563			Cotton_A_18306	AT3G16520		Gh_D07G0750	AT1G66810
Cotton_A_06486	-1.0764	1.01315	-0.834592	-1.95616	-2.10851	-2.73968			Cotton_A_05341	AT5G45470		Gh_D07G0527	AT5G14210
Cotton_A_27115	0.772341	-1.55064	-0.721327	-2.25676	0.129732	0.104026			Cotton_A_02966	AT3G07010		Gh_D07G0460	AT5G51070
Cotton_A_23546	-0.707952	0.380615	-0.140607	-1.22537	-1.25264	-0.540751			Cotton_A_30234	AT1G28130		Gh_D07G0219	AT2G25790
Cotton_A_32062	-2.21528	0.00805934	-0.420967	-1.09867	-2.29583	-1.47956			Cotton_A_29288	AT4G27190		Gh_A07G0162	AT2G25790
Cotton_A_33908	-1.34363	1.49185	0.02327	-0.867684	0.543288	-0.321468			Cotton_A_19980	AT5G01890		Gh_D07G0108	AT2G19580
Cotton_A_16389	2.12737	-2.12737	-2.51345	-2.53309	-1.42084	0.130457			Cotton_A_18889	AT3G14067		Gh_A05G0216	AT2G19580
Cotton_A_07609	-2.81433	1.53394	-0.412591	-2.30497	-1.64557	-1.48185			Cotton_A_23546	AT5G67200		Gh_D07G0019	AT4G30170
Cotton_A_27100	-1.33326	1.55728	-0.116064	-0.216087	-1.20395	-0.243178			Cotton_A_01463	AT1G73220		Gh_D06G2319	AT5G49665
Cotton_A_16393	-2.85705	0.485611	-0.90239	-1.66278	-0.347618	-1.64862			Cotton_A_38327	AT1G14390		Gh_D06G1932	AT5G36110
Cotton_A_21234	1.28749	-1.28749	0.537548	-0.295901	-0.699417	-1.70997			Cotton_A_36293	AT1G79620		Gh_D06G1447	AT4G18760
Cotton_A_09118	-0.972614	-0.843502	-0.713536	-1.15809	-1.72753	-1.16897			Cotton_A_10342	AT2G20080		Gh_D05G3245	AT3G14460
Cotton_A_19300	-1.885	-1.35239	-1.26071	-2.60068	-3.25708	-2.73567			Cotton_A_08461	AT1G11915		Gh_D05G3021	AT3G26610
Cotton_A_14201	-0.802613	-1.29563	-0.146328	-1.34005	-2.36101	-1.94669			Cotton_A_26205	AT3G47510		Gh_D05G2641	AT3G10870
Cotton_A_03565	-2.1692	3.12941	-1.44374	-2.33912	-1.12031	-4.73099			Cotton_A_32062	AT4G12730		Gh_D05G2012	AT1G27450
Cotton_A_37268	-0.0951784	-0.564757	-0.539025	-0.999053	-1.9579	-1.72349			Cotton_A_14274	AT4G19120		Gh_A05G1816	AT1G27450
Cotton_A_04561	-0.198185	-0.16477	-0.938835	-0.578134	-1.69777	-0.798235			Cotton_A_23892	AT1G12260		Gh_D05G1785	AT1G75680
Cotton_A_04020	-3.01073	1.55519	-0.809577	-2.43247	-0.971857	-1.33159			Cotton_A_18490	AT3G62630		Gh_D05G1456	AT1G07650
Cotton_A_39767	-1.77644	0.496895	-1.39669	-2.75273	-1.44961	-1.44471			Cotton_A_16793	AT1G53050		Gh_D05G1106	AT3G13040
Cotton_A_16216	-2.04404	1.71496	-0.376783	-1.24932	-0.364609	-0.635109			Cotton_A_05112	AT5G21105		Gh_D05G0899	AT5G59010
Cotton_A_12671	-0.992446	0.853386	-0.00138164	-0.441493	-0.518879	-0.44301			Cotton_A_07609	AT1G73590		Gh_D05G0537	AT5G58000
Cotton_A_02966	-0.595773	-0.351426	0.351866	-0.474766	-2.43396	-0.533546			Cotton_A_12092	AT5G03150		Gh_D05G0534	AT2G24260
Cotton_A_31015	0.900184	-0.62152	0.182592	-0.553419	-0.347057	0.0359003			Cotton_A_01650	AT3G50780		Gh_D05G0485	AT5G23340
Cotton_A_13605	-0.930144	-0.000356018	-0.552103	-1.51089	-0.702717	-0.869206			Cotton_A_13982	AT5G17920		Gh_D05G0041	AT4G30190
Cotton_A_39481	0.0409406	-0.401414	-0.876732	-1.31285	-1.72044	-2.25352			Cotton_A_03377	AT1G01900		Gh_A05G4009	AT4G30190
Cotton_A_17768	-0.146279	0.214181	-0.394072	-0.100728	-0.461593	-0.320338			Cotton_A_17093	AT1G80870		Gh_D04G1736	AT4G20820
Cotton_A_09270	-1.23279	0.106595	0.668382	0.336741	-0.434027	-0.480481			Cotton_A_30270	AT2G01820		Gh_A04G1123	AT4G20820
Cotton_A_30823	-0.170724	0.220629	-0.53559	-0.727436	-0.497896	-1.45137			Cotton_A_39398	AT3G09070		Gh_D04G1504	AT5G64080
Cotton_A_30234	-0.64799	-1.52223	0.166017	0.52609	-1.12209	-0.997202			Cotton_A_04020	AT1G71380		Gh_D04G1498	AT1G76800
Cotton_A_08661	0.525149	-1.1647	-0.8333	-1.20828	-1.02651	-1.37985			Cotton_A_00511	AT2G36570		Gh_D04G1244	AT2G38090
Cotton_A_04405	0.504039	-0.0893435	-0.0382961	-0.504354	-0.234604	0.665415			Cotton_A_31578	AT2G37460		Gh_D04G1185	AT3G53810
Cotton_A_27181	-0.468115	1.54258	-0.567107	-1.42313	0.938494	-0.704532			Cotton_A_12374	AT5G46530		Gh_D04G1103	AT3G53380
Cotton_A_15722	-0.556117	0.178128	0.00548074	-0.784557	-1.66452	-0.749574			Cotton_A_09634	AT3G17350		Gh_D04G0742	AT3G01900
Cotton_A_18306	0	-0.636446	0	0	-1.79012	-0.915151			Cotton_A_04405	AT1G14920		Gh_D04G0626	AT5G05960
Cotton_A_29997	-1.82031	0.588809	-0.823268	-2.00728	-0.648067	0.161775			Cotton_A_37478	AT3G51550		Gh_D03G1568	AT5G47450
Cotton_A_14208	-1.71143	-0.765859	-1.06864	-3.21801	-3.60309	-0.784272			Cotton_A_03565	AT4G25420		Gh_A03G0083	AT5G47450
Cotton_A_31319	-0.392372	-0.385658	-0.134582	-0.813175	-0.771809	-1.69541			Cotton_A_15722	AT3G14172		Gh_D03G1109	AT1G07230
Cotton_A_19061	-2.15472	0	-1.39206	-2.05592	-0.923092	-2.85708			Cotton_A_20534	AT3G50170		Gh_D03G0466	AT5G39100
Cotton_A_28624	-0.541758	0	-0.932787	-0.596006	-0.600673	-0.921957			Cotton_A_36511	AT3G51895		Gh_D03G0374	AT2G22430
Cotton_A_36293	-0.295737	0.723753	-0.0110204	-0.813624	-1.40138	-1.23223			Cotton_A_39481	AT2G01990		Gh_D03G0119	AT1G27660
Cotton_A_11342	-0.108634	-0.27621	0.110364	-0.0176498	0.126551	-0.857016			Cotton_A_12800	AT1G77380		Gh_A02G1604	AT1G27660
Cotton_A_31578	-2.69549	0.886225	-0.600621	-2.7372	-0.97913	-1.93049			Cotton_A_26953	AT3G25500		Gh_D03G0109	AT4G36360
Cotton_A_00329	-1.81999	1.012	-0.498237	-1.78126	-0.779918	-1.10468			Cotton_A_33239	AT5G24910		Gh_D02G2435	AT1G10200
Cotton_A_36511	2.3114	-2.08938	-0.318185	-1.78768	-0.308215	-0.716611			Cotton_A_38290	AT1G70370		Gh_D02G1888	AT4G03230
Cotton_A_16579	0.182027	1.4028	-1.08963	-2.27622	-0.569059	-0.0439146			Cotton_A_32578	AT4G37750		Gh_D02G1346	AT1G05260
Cotton_A_37190	-0.785897	0.0276249	-0.334184	-1.12394	-1.44589	-0.995299			Cotton_A_31319	AT4G37750		Gh_A03G0960	AT1G05260
Cotton_A_33239	-3.40343	2.2346	-0.479528	-1.93591	0.585298	-0.628545			Cotton_A_19911	AT5G63380		Gh_D02G0964	AT4G39090
Cotton_A_32314	-0.928159	0.142685	-0.584992	-1.57448	-1.53188	-1.39852			Cotton_A_07778	AT3G57880		Gh_D02G0956	AT1G75380
Cotton_A_12733	-0.89675	0.746414	-0.74127	-1.69411	-0.620416	-2.84743			Cotton_A_11088	AT3G44200		Gh_D02G0920	AT1G47480
Cotton_A_33724	-1.31675	-0.0405766	-0.840575	-1.77717	-1.3705	-0.242282			Cotton_A_32314	AT3G06130		Gh_D02G0721	AT1G10830
Cotton_A_03588	-0.368002	0.0902807	-0.531289	-1.15752	-0.671327	-1.36248			Cotton_A_38407	AT4G00430		Gh_D02G0445	AT5G43310
Cotton_A_09634	-1.2335	0.649578	-0.322628	-2.30768	-2.58959	-2.67458			Cotton_A_06486	AT3G44730		Gh_D01G2203	AT5G01170
Cotton_A_29822	-0.799229	-0.226154	-0.937956	-1.18711	-0.45948	-0.969226			Cotton_A_11726	AT1G14790		Gh_D01G1620	AT4G38660
Cotton_A_23892	-1.59622	2.82005	-0.39946	-1.09809	-0.498449	0.00572798			Cotton_A_17768	AT4G28000		Gh_A11G0393	AT4G38660
Cotton_A_22470	-0.484738	0.311517	0.0812527	-1.43247	0.0218027	-0.74914			Cotton_A_31015	AT2G26730		Gh_D01G1617	AT2G21050
Cotton_A_12092	-0.0538435	-0.904096	-0.305631	-1.14297	0.0486989	0.523777			Cotton_A_28624	AT3G23240		Gh_D01G1544	AT3G26580
Cotton_A_01463	-1.16268	0.648105	-0.765765	-2.46823	-1.81006	-1.25917			Cotton_A_18959	AT3G14310		Gh_A01G1321	AT3G26580
Cotton_A_40750	-0.458246	-0.641017	-0.648728	-1.26277	-0.963144	-1.96503			Cotton_A_25640	AT1G61890		Gh_D01G1490	AT1G27980
Cotton_A_10342	-0.884503	0	-0.515515	-0.994845	-0.379942	-1.10494			Cotton_A_18279	AT4G17220		Gh_D01G1459	AT1G70840
Cotton_A_11140	-5.17741	4.53478	0.401479	-1.23728	-3.08575	-2.14301			Cotton_A_35816	AT5G67360		Gh_D01G1371	AT3G19850
Cotton_A_17525	-0.229169	0.309212	-0.146442	-0.992527	-0.429618	-0.0843186			Cotton_A_00476	AT2G36910		Gh_D01G0335	AT4G10780
Cotton_A_19655	-2.24925	0.600976	-0.571767	-2.22478	-0.0323653	-0.30256			Cotton_A_29997	AT1G48570		Gh_A13G0806	AT5G19790
Cotton_A_16793	-0.695856	0.465917	-0.306471	-0.652813	-0.826254	-0.308535			Cotton_A_37268	AT2G01950		Gh_A13G0791	AT3G25560
Cotton_A_39510	-1.64798	-0.236871	-0.286276	-1.59514	-0.670689	-1.05995			Cotton_A_06179	AT1G69310		Gh_A13G0607	AT5G64290
Cotton_A_25640	-0.0111187	0.456989	-0.628263	-1.05173	0.0953311	-1.34678			Cotton_A_06848	AT1G75260		Gh_A13G0597	AT1G02170
Cotton_A_19911	-0.661338	0.79247	-0.549441	-1.25913	0.201972	-0.746896						Gh_A12G2708	AT2G44480
Cotton_A_24859	0.0215926	0.22854	-0.983039	-1.33137	0.573388	-0.273513						Gh_A12G2681	AT4G23490
Cotton_A_06179	-2.81863	1.8201	-1.05382	-1.0704	-0.551112	0.768442						Gh_A12G2553	AT5G65700
Cotton_A_14274	1.15936	-0.615294	0.490916	0.528841	-1.17272	-0.448039						Gh_A12G2461	AT2G02010
Cotton_A_04455	0.989337	-1.35194	-0.845135	-0.486786	-0.525221	-0.510806						Gh_A12G1937	AT5G04770
Cotton_A_14511	0	0	-0.522525	-1.16689	-0.171174	-1.26335						Gh_A12G1292	AT1G27440
												Gh_A12G1056	AT4G01410
												Gh_A12G0962	AT1G01540
												Gh_A12G0426	AT2G34650
												Gh_A11G3010	AT5G62710
												Gh_A11G2826	AT2G35910
												Gh_A11G2365	AT1G54710
												Gh_A11G1395	AT3G07800
												Gh_A11G1278	AT5G48800
												Gh_A11G0378	AT1G68400
												Gh_A11G0236	AT4G12520
												Gh_A10G2237	AT1G72510
												Gh_A10G0449	AT5G59970
												Gh_A10G0105	AT4G22130
												Gh_A10G0093	AT4G22290
												Gh_A09G2440	AT3G54030
												Gh_A09G2203	AT5G23720
												Gh_A08G2309	AT5G45275
												Gh_A08G1950	AT5G17820
												Gh_A08G1149	AT4G00230
												Gh_A07G1963	AT3G28860
												Gh_A07G1947	AT2G31160
												Gh_A07G1444	AT2G20300
												Gh_A07G1126	AT3G08500
												Gh_A06G1274	AT4G21210
												Gh_A06G1197	AT4G18260
												Gh_A06G0198	AT4G37320
												Gh_A05G3776	AT2G40480
												Gh_A05G3614	AT1G14040
												Gh_A05G3101	AT5G40470
												Gh_A05G2892	AT2G03430
												Gh_A05G2114	AT5G09360
												Gh_A05G1565	AT5G42210
												Gh_A05G1516	AT5G47770
												Gh_A05G1445	AT4G21890
												Gh_A05G1300	AT2G42610
												Gh_A05G0951	AT3G51680
												Gh_A05G0834	AT4G01470
												Gh_A05G0291	AT3G13540
												Gh_A04G0955	AT1G21140
												Gh_A04G0822	AT2G43235
												Gh_A03G0714	AT2G21430
												Gh_A03G0631	AT5G15630
												Gh_A03G0451	AT5G50400
												Gh_A02G1480	AT5G24010
												Gh_A02G1246	AT5G07010
												Gh_A02G0615	AT4G02600
												Gh_A01G1736	AT1G52340
												Gh_A01G1681	AT2G40890
												Gh_A01G1029	AT5G49630
												Gh_A01G0158	AT5G21090
