# Supplementary material for: Genome-Wide Investigation and Co-Expression Network Analysis of SBT Family Gene in Gossypium
Source: Int J Mol Sci. 2023 Mar 17;24(6):5760. doi: 10.3390/ijms24065760 (PMC10056545; doi:10.3390/ijms24065760)
Supplement: Supplementary file 1 [file ijms-24-05760-s001.zip › TableS7.xlsx]

## Sheet: G.hirsutum
ID	Orthologous genes in G. arboreum	blastp_score(Ga)	balstp_e-value(Ga)	block_score(Ga)	block_E-value(Ga)	Orthologous genes in G. raimondii	blastp_score(Gr)	balstp_e-value(Gr)	block_score(Gr)	block_E-value(Gr)
Gh_A13G1684	Cotton_A_03171	1560	0	5700	0	Gorai.004G284900.1	1303	0	800	4.4e-41
Gh_Sca005023G04	Cotton_A_03171	1540	0	200	0.00051	Gorai.013G223900.1	1562	0	200	0.0014
Gh_D10G2586	Cotton_A_18889	1532	0	150	0.07	Gorai.011G061400.1	1548	0	500	7.1e-21
Gh_A10G2239	Cotton_A_18889	1560	0	150	0.065	Gorai.011G061400.1	1508	0	200	0.00033
Gh_A10G0470	Cotton_A_08556	1558	0	4000	0
Gh_D10G0493	Cotton_A_08556	1544	0	3800	3.4e-307
Gh_A04G0029	Cotton_A_07447	1572	0	2500	8.2e-180	Gorai.009G453100.1	1537	0	5450	0
Gh_D05G3705	Cotton_A_07447	1546	0	2450	5.7e-176	Gorai.009G453100.1	1556	0	8000	0
Gh_A12G0941	Cotton_A_03377	1297	0	1450	7.9e-93	Gorai.008G115600.1	1315	0	5850	0
Gh_D12G1031	Cotton_A_03377	1423	0	1750	1.9e-115	Gorai.008G115600.1	1560	0	65650	0
Gh_A05G1808	Cotton_A_35816	1552	0	300	6.6e-09	Gorai.005G099900.1	1225	0	4400	0
Gh_D05G2004	Cotton_A_35816	1540	0	300	1.6e-08	Gorai.005G099900.1	1220	0	3750	5.6e-311
Gh_A09G1291	Cotton_A_00534		5e-33	250	6e-08
Gh_A08G0882	Cotton_A_02434	2360	0	300	7.6e-10	Gorai.004G118400.1	722	0	1050	7.7e-68
Gh_A11G0092	Cotton_A_02434	2694	0	5150	0	Gorai.004G118300.1	1788	0	200	0.0003
Gh_D08G1072	Cotton_A_02434	2342	0	400	7.3e-17	Gorai.004G118400.1	728	0	104600	0
Gh_D11G0095	Cotton_A_02434	2673	0	5400	0	Gorai.004G118400.1	580	0	400	1.3e-15
Gh_A05G1162	Cotton_A_02647	1548	0	4250	0	Gorai.009G146000.1	1530	0	35300	0
Gh_D05G1339	Cotton_A_02647	1533	0	7250	0	Gorai.009G146000.1	1550	0	8550	0
Gh_D10G2586	Cotton_A_02647	1286	0	150	0.06	Gorai.009G146000.1	1277	0	150	0.072
Gh_A12G0939	Cotton_A_03375	1552	0	1450	7.9e-93	Gorai.008G115400.1	1537	0	5850	0
Gh_A12G0940	Cotton_A_03375	1249	0	550	3.3e-24	Gorai.008G115400.1	1249	0	950	4.1e-52
Gh_D12G1029	Cotton_A_03375	1501	0	1750	1.9e-115	Gorai.008G115400.1	1549	0	65650	0
Gh_D12G1030	Cotton_A_03375	1246	0	600	1.9e-29	Gorai.008G115600.1	836	0	1200	2.9e-71
Gh_A12G0939	Cotton_A_03376	1251	0	150	0.0033
Gh_A12G0940	Cotton_A_03376	1567	0	1450	7.9e-93	Gorai.008G115500.1	1528	0	5850	0
Gh_A12G0941	Cotton_A_03376	768	0	550	3.3e-24	Gorai.008G115500.1	774	0	950	4.1e-52
Gh_D12G1029	Cotton_A_03376	1235	0	300	1.2e-09	Gorai.008G115500.1	1243	0	1200	2.9e-71
Gh_D12G1030	Cotton_A_03376	1495	0	1750	1.9e-115	Gorai.008G115500.1	1522	0	65650	0
Gh_D12G1031	Cotton_A_03376	840	0	600	1.9e-29	Gorai.008G115500.1	846	0	300	9.2e-10
Gh_A07G1757	Cotton_A_03725	1298	0	1900	1.3e-142	Gorai.007G164000.1	1285	0	1600	2.7e-109
Gh_A11G1366	Cotton_A_03725	1555	0	5900	0
Gh_D07G1962	Cotton_A_03725	1308	0	1800	4.9e-129	Gorai.007G164000.1	1295	0	1250	2e-79
Gh_D11G1511	Cotton_A_03725	1520	0	5600	0	Gorai.007G164000.1	1557	0	26000	0
Gh_A10G0304	Cotton_A_03979	1453	0	6150	0	Gorai.010G163700.1	912	0	1000	4.9e-56
Gh_D06G1476	Cotton_A_03979	943	0	150	0.035	Gorai.001G224300.1	631	0	150	0.097
Gh_D10G0306	Cotton_A_03979	1518	0	5850	0	Gorai.010G163700.1	965	0	1050	1.1e-59
Gh_A03G0178	Cotton_A_04139	1589	0	5600	0	Gorai.003G154100.1	1557	0	10450	0
Gh_D03G1406	Cotton_A_04139	1564	0	5600	0	Gorai.003G154100.1	1578	0	16350	0
Gh_A08G0221	Cotton_A_04621		6e-32	150	0.054	Gorai.004G034100.1	1511	0	28200	0
Gh_A11G1366	Cotton_A_04621	128	7e-34	300	1.6e-08	Gorai.007G164000.1	1490	0	51850	0
Gh_A08G0221	Cotton_A_06799	1311	0	3850	1.3e-313
Gh_D08G0301	Cotton_A_06799	1295	0	5000	0	Gorai.004G034100.1	1537	0	104600	0
Gh_A05G1761	Cotton_A_08666	1520	0	4250	0	Gorai.007G214100.1	686	0	250	2e-06
Gh_A05G1762	Cotton_A_08666	587	0	600	1.4e-29	Gorai.009G213600.1	1483	0	35300	0
Gh_A06G0170	Cotton_A_08666	766	0	400	3.9e-15	Gorai.007G214100.1	835	0	200	0.00028
Gh_A06G0166	Cotton_A_08666	751	0	1800	2.4e-123	Gorai.009G275900.1	1084	0	2400	4.5e-181
Gh_A12G0209	Cotton_A_08666	551	0	300	1.3e-09	Gorai.008G024400.1	790	0	11800	0
Gh_D05G1955	Cotton_A_08666	1531	0	4350	0	Gorai.007G214100.1	706	0	250	1.1e-06
Gh_D11G1939	Cotton_A_08666	711	0	700	4e-37	Gorai.007G214100.1	1560	0	11250	0
Gh_D05G1956	Cotton_A_08666	578	0	350	4.6e-14
Gh_D06G0158	Cotton_A_08666	739	0	2050	1.1e-141	Gorai.009G213500.1	733	0	4250	0
Gh_A05G1762	Cotton_A_08667	1533	0	4250	0	Gorai.008G024400.1	490	8e-165	150	0.064
Gh_A12G0208	Cotton_A_08667	581	0	300	1.3e-09	Gorai.009G213600.1	569	0	250	1.8e-06
Gh_D12G0210	Cotton_A_08667	575	0	250	7.3e-06	Gorai.008G024400.1	1203	0	400	1.9e-13
Gh_D05G1956	Cotton_A_08667	1526	0	4350	0	Gorai.009G213600.1	1495	0	35950	0
Gh_D05G2497	Cotton_A_08667	595	0	550	1.8e-27	Gorai.009G213600.1	586	0	150	0.013
Gh_A08G1590	Cotton_A_09950	1501	0	3400	9.7e-288	Gorai.004G205600.1	1482	0	29650	0
Gh_D08G1900	Cotton_A_09950	1476	0	200	0.0016	Gorai.004G205600.1	1499	0	250	3.3e-07
Gh_A08G1591	Cotton_A_09951	1546	0	3400	9.7e-288	Gorai.004G205600.1	939	0	150	0.019
Gh_D08G1900	Cotton_A_09951	917	0	3450	3.2e-288	Gorai.004G205700.1	704	0	104600	0
Gh_A08G1601	Cotton_A_09963	1602	0	3400	9.7e-288	Gorai.004G206800.1	1579	0	29650	0
Gh_D08G1912	Cotton_A_09963	1578	0	3450	3.2e-288	Gorai.004G206800.1	1595	0	104600	0
Gh_A10G0049	Cotton_A_10230	1650	0	2900	8.3e-213	Gorai.011G006000.1	1654	0	23750	0
Gh_D05G1060	Cotton_A_10230	1326	0	450	8e-17	Gorai.011G006000.1	1323	0	400	3e-14
Gh_D10G0056	Cotton_A_10230	1610	0	2900	1.3e-212	Gorai.011G006000.1	1686	0	8950	1.1e-239
Gh_A05G1762	Cotton_A_10766	642	0	200	0.0013
Gh_A12G0209	Cotton_A_10766	1083	0	550	6.3e-24
Gh_A12G0208	Cotton_A_10766	1398	0	3100	2.5e-246
Gh_D12G0211	Cotton_A_10766	801	0	550	1.8e-26
Gh_D12G0210	Cotton_A_10766	1294	0	3050	1.2e-235
Gh_D05G1956	Cotton_A_10766	636	0	300	3.8e-08
Gh_D05G2497	Cotton_A_10766	664	0	150	0.071
Gh_A12G0209	Cotton_A_10767	910	0	3100	2.5e-246
Gh_A12G0208	Cotton_A_10767	956	0	350	1.2e-10
Gh_D12G0211	Cotton_A_10767	738	0	3050	1.2e-235	Gorai.008G024400.1	1040	0	29700	0
Gh_D12G0210	Cotton_A_10767	928	0	300	4.5e-09
Gh_A02G0839	Cotton_A_10921	1546	0	600	3.5e-45	Gorai.009G218000.1	1218	0	750	8.1e-42
Gh_A05G1808	Cotton_A_10921	1229	0	500	1.4e-24	Gorai.007G221100.1	1068	0	500	2.4e-21
Gh_A10G0470	Cotton_A_10921	734	0	150	0.066	Gorai.011G056000.1	1556	0	23750	0
Gh_D02G0889	Cotton_A_10921	1513	0	450	1.4e-22	Gorai.005G099900.1	1562	0	49850	0
Gh_D05G2004	Cotton_A_10921	1222	0	500	3.3e-24	Gorai.007G221100.1	1063	0	450	1.4e-18
Gh_A08G1149	Cotton_A_10948	1173	0	150	0.025
Gh_A11G0757	Cotton_A_10948	1536	0	750	4.2e-36
Gh_D08G1431	Cotton_A_10948	1222	0	200	0.00035
Gh_D11G0885	Cotton_A_10948	1525	0	1050	2.6e-57	Gorai.007G094000.1	1545	0	64250	0
Gh_A05G0169	Cotton_A_11161	1838	0	3450	9.3e-280	Gorai.004G280300.1	1838	0	1750	4e-120
Gh_A08G2147	Cotton_A_11161	1623	0	850	3e-47	Gorai.004G280300.1	2097	0	10650	0
Gh_D05G0233	Cotton_A_11161	1804	0	3900	7.7e-320	Gorai.004G280300.1	1821	0	2650	4.8e-198
Gh_D08G2514	Cotton_A_11161	1611	0	800	6.5e-45	Gorai.004G280300.1	2101	0	8750	0
Gh_A08G2197	Cotton_A_11860	1153	0	3300	3.2e-248
Gh_A13G1684	Cotton_A_11860	1268	0	700	2.6e-34	Gorai.013G223900.1	1543	0	9050	0
Gh_D08G2562	Cotton_A_11860	1448	0	3250	3.8e-245
Gh_A05G0776	Cotton_A_12899	1375	0	3000	2.8e-226	Gorai.009G095600.1	1383	0	10400	0
Gh_D05G0906	Cotton_A_12899	1343	0	2350	1.3e-168	Gorai.009G095600.1	1299	0	13550	0
Gh_A02G0947	Cotton_A_13191	804	0	450	2.7e-21	Gorai.008G260500.1	809	0	500	5.4e-21
Gh_A12G2187	Cotton_A_13191	1588	0	3150	1e-240	Gorai.003G074100.1	797	0	500	4.1e-20
Gh_D12G2367	Cotton_A_13191	1567	0	2950	6.9e-222	Gorai.003G074100.1	804	0	500	6.7e-20
Gh_A11G0221	Cotton_A_13261	177	6e-60	350	1.8e-11
Gh_A12G2124	Cotton_A_13261	197	8e-68	3150	1e-240
Gh_D11G0235	Cotton_A_13261	175	6e-59	350	1.9e-11
Gh_D12G2304	Cotton_A_13261	196	3e-67	2950	6.9e-222	Gorai.008G253500.1	197	1e-67	4950	0
Gh_A09G1291	Cotton_A_13434	1460	0	2400	1.6e-180	Gorai.006G156500.1	1504	0	2050	5e-146
Gh_D09G1326	Cotton_A_13434	1440	0	1500	1.5e-93	Gorai.006G156500.1	1527	0	13200	0
Gh_A10G2025	Cotton_A_13488	213	2e-64	150	0.083	Gorai.011G272500.1	896	0	250	1.1e-06
Gh_Sca004818G04	Cotton_A_13488	210	2e-64	200	0.00055	Gorai.011G272500.1	975	0	150	0.089
Gh_Sca004818G05	Cotton_A_13488	210	3e-64	250	5.2e-06	Gorai.011G272300.1	1112	0	250	2e-05
Gh_Sca004818G06	Cotton_A_13488	234	5e-73	300	2.9e-08	Gorai.011G272500.1	944	0	300	1.3e-07
Gh_A10G2024	Cotton_A_13489	1233	0	150	0.083	Gorai.011G272300.1	977	0	150	0.0062
Gh_A10G2025	Cotton_A_13489	1186	0	150	0.048
Gh_A10G2026	Cotton_A_13489	1100	0	150	0.031	Gorai.011G272500.1	889	0	550	2.3e-26
Gh_A10G2027	Cotton_A_13489	1036	0	200	0.00081	Gorai.011G272500.1	939	0	33750	0
Gh_Sca004818G01	Cotton_A_13489	924	0	250	9.5e-07
Gh_Sca004818G02	Cotton_A_13489	912	0	200	0.00025
Gh_Sca004818G03	Cotton_A_13489	1040	0	200	0.00055
Gh_Sca004818G04	Cotton_A_13489	1206	0	250	5.2e-06	Gorai.011G272200.1	1498	0	250	2e-05
Gh_Sca004818G05	Cotton_A_13489	1248	0	300	2.9e-08	Gorai.011G272400.1	941	0	300	1.3e-07
Gh_Sca004818G06	Cotton_A_13489	1324	0	300	8.8e-09	Gorai.011G272400.1	926	0	250	2e-05
Gh_A06G1462	Cotton_A_13490	870	0	400	1.7e-17	Gorai.010G200300.1	1407	0	10800	0
Gh_A10G2024	Cotton_A_13490	1326	0	150	0.048
Gh_A10G2025	Cotton_A_13490	1186	0	150	0.031	Gorai.011G272300.1	1035	0	550	2.3e-26
Gh_A10G2026	Cotton_A_13490	1177	0	200	0.00081	Gorai.011G272300.1	1037	0	33750	0
Gh_A10G2027	Cotton_A_13490	1059	0	200	0.0015	Gorai.011G272300.1	1434	0	900	9.8e-50
Gh_Sca004818G01	Cotton_A_13490	942	0	200	5.8e-05
Gh_Sca004818G02	Cotton_A_13490	924	0	200	0.00055
Gh_Sca004818G03	Cotton_A_13490	1059	0	250	5.2e-06	Gorai.011G272100.1	1113	0	250	2e-05
Gh_Sca004818G04	Cotton_A_13490	1280	0	300	2.9e-08	Gorai.011G272300.1	1120	0	300	1.3e-07
Gh_Sca004818G05	Cotton_A_13490	1313	0	300	8.8e-09	Gorai.011G272500.1	966	0	250	2.2e-05
Gh_Sca004818G06	Cotton_A_13490	1443	0	250	4.3e-06	Gorai.011G272300.1	1072	0	200	0.002
Gh_A10G2025	Cotton_A_13491	1254	0	200	0.00081	Gorai.011G272200.1	1200	0	33750	0
Gh_A10G2026	Cotton_A_13491	1025	0	200	0.0015	Gorai.011G272200.1	1365	0	900	9.8e-50
Gh_Sca004818G04	Cotton_A_13491	1133	0	300	8.8e-09	Gorai.011G272400.1	932	0	250	2.2e-05
Gh_Sca004818G05	Cotton_A_13491	1235	0	250	4.3e-06	Gorai.011G272200.1	1337	0	200	0.002
Gh_Sca004818G06	Cotton_A_13491	1105	0	200	0.0015	Gorai.011G272200.1	1265	0	150	0.12
Gh_A10G2025	Cotton_A_13493	403	7e-134	200	0.0015	Gorai.011G272100.1	1338	0	900	9.8e-50
Gh_A10G2026	Cotton_A_13493	436	1e-150	150	0.12	Gorai.011G272000.1	1173	0	400	1.1e-15
Gh_Sca004818G04	Cotton_A_13493	449	3e-155	250	4.3e-06	Gorai.011G272100.1	1359	0	200	0.002
Gh_Sca004818G05	Cotton_A_13493	407	1e-138	200	0.0015	Gorai.011G272100.1	1541	0	150	0.12
Gh_Sca004818G06	Cotton_A_13493	404	2e-137	150	0.11	Gorai.011G272000.1	1607	0	150	0.076
Gh_A10G2024	Cotton_A_13494	258	1e-78	200	0.00081	Gorai.011G272100.1	1223	0	33750	0
Gh_A06G1461	Cotton_A_13495	857	0	400	1.7e-17	Gorai.010G200200.1	950	0	10800	0
Gh_A10G2024	Cotton_A_13495	1132	0	200	0.0015	Gorai.011G272000.1	1350	0	900	9.8e-50
Gh_A10G2025	Cotton_A_13495	1307	0	150	0.12
Gh_A10G2027	Cotton_A_13495	1065	0	200	0.0012	Gorai.011G272200.1	1098	0	700	3.5e-36
Gh_A11G0757	Cotton_A_13495	634	0	150	0.067	Gorai.004G155800.1	1232	0	550	3.7e-25
Gh_D06G2361	Cotton_A_13495	838	0	350	5.6e-14	Gorai.010G200300.1	992	0	550	5.2e-24
Gh_Sca004818G01	Cotton_A_13495	937	0	200	0.00055	Gorai.011G272500.1	1494	0	150	0.076
Gh_Sca004818G02	Cotton_A_13495	934	0	250	5.2e-06	Gorai.011G272000.1	922	0	250	2e-05
Gh_Sca004818G03	Cotton_A_13495	1072	0	300	2.9e-08	Gorai.011G272200.1	1101	0	300	1.3e-07
Gh_Sca004818G04	Cotton_A_13495	1254	0	200	0.0015	Gorai.011G272000.1	1274	0	150	0.12
Gh_Sca004818G05	Cotton_A_13495	1368	0	150	0.11
Gh_Sca004818G06	Cotton_A_13495	1227	0	150	0.097
Gh_A10G2024	Cotton_A_13496	1028	0	150	0.031	Gorai.011G272400.1	863	0	250	1.1e-06
Gh_A10G2026	Cotton_A_13496	1038	0	200	0.0012	Gorai.011G272100.1	1253	0	700	3.5e-36
Gh_Sca004818G04	Cotton_A_13496	1145	0	150	0.11
Gh_Sca004818G05	Cotton_A_13496	1248	0	150	0.097
Gh_Sca004818G06	Cotton_A_13496	1122	0	150	0.086
Gh_A10G2024	Cotton_A_13497	1070	0	150	0.12
Gh_A10G2025	Cotton_A_13497	1173	0	200	0.0012	Gorai.011G272000.1	1188	0	700	3.5e-36
Gh_A10G2026	Cotton_A_13497	1284	0	1550	1.5e-107
Gh_Sca004818G01	Cotton_A_13497	934	0	250	5.2e-06	Gorai.011G272300.1	952	0	150	0.089
Gh_Sca004818G02	Cotton_A_13497	913	0	300	2.9e-08	Gorai.011G272100.1	960	0	300	1.3e-07
Gh_Sca004818G03	Cotton_A_13497	1073	0	300	8.8e-09	Gorai.011G272300.1	1464	0	250	2.2e-05
Gh_Sca004818G04	Cotton_A_13497	1356	0	150	0.097
Gh_Sca004818G05	Cotton_A_13497	1227	0	150	0.086
Gh_Sca004818G06	Cotton_A_13497	1165	0	150	0.098
Gh_A10G2027	Cotton_A_13498	1426	0	1550	1.5e-107	Gorai.011G272100.1	1112	0	400	1.1e-15
Gh_Sca004818G01	Cotton_A_13498	926	0	300	2.9e-08	Gorai.011G272000.1	937	0	300	1.3e-07
Gh_Sca004818G02	Cotton_A_13498	905	0	300	8.8e-09	Gorai.011G272200.1	935	0	250	2.2e-05
Gh_Sca004818G03	Cotton_A_13498	1403	0	250	4.3e-06	Gorai.011G272000.1	1061	0	200	0.002
Gh_Sca004818G04	Cotton_A_13498	1104	0	150	0.086
Gh_Sca004818G05	Cotton_A_13498	1097	0	150	0.098
Gh_Sca004818G06	Cotton_A_13498	1046	0	150	0.12
Gh_Sca004818G01	Cotton_A_13499	376	1e-124	300	8.8e-09	Gorai.011G272100.1	973	0	250	2.2e-05
Gh_Sca004818G02	Cotton_A_13499	554	0	250	4.3e-06	Gorai.011G272400.1	1346	0	150	0.089
Gh_Sca004818G04	Cotton_A_13499	367	4e-121	150	0.098
Gh_Sca004818G05	Cotton_A_13499	373	2e-123	150	0.12
Gh_Sca004818G06	Cotton_A_13499	366	2e-120	200	0.00025
Gh_A10G2024	Cotton_A_13500	642	0	200	0.0012	Gorai.011G272200.1	1169	0	550	2.3e-26
Gh_Sca004818G02	Cotton_A_13500	734	0	200	0.0015
Gh_Sca004818G04	Cotton_A_13500	725	0	150	0.12
Gh_Sca004818G06	Cotton_A_13500	731	0	200	5.8e-05
Gh_A05G0169	Cotton_A_14510	1821	0	1100	2.8e-67	Gorai.009G025200.1	2115	0	7350	0
Gh_A08G2147	Cotton_A_14510	2060	0	2900	1.3e-210	Gorai.009G025200.1	1836	0	650	3.2e-31
Gh_D05G0233	Cotton_A_14510	1805	0	1300	1.4e-80	Gorai.009G025200.1	2132	0	29250	0
Gh_D08G2514	Cotton_A_14510	2038	0	2650	3.2e-188	Gorai.009G025200.1	1819	0	600	4.7e-27
Gh_A06G0170	Cotton_A_14888	1513	0	250	4.8e-06	Gorai.010G021100.1	907	0	200	0.0021
Gh_A06G0166	Cotton_A_14888	1321	0	150	0.092	Gorai.010G021100.1	1033	0	3000	4.6e-231
Gh_D06G0164	Cotton_A_14888	1504	0	250	4.1e-06	Gorai.010G021100.1	907	0	200	0.0011
Gh_D11G1939	Cotton_A_14888	853	0	550	2.7e-26	Gorai.010G021600.1	853	0	650	1.5e-32
Gh_D06G0158	Cotton_A_14888	1298	0	300	5.4e-08	Gorai.010G021100.1	972	0	11100	0
Gh_A05G1760	Cotton_A_14893	388	6e-129	1450	2.3e-91	Gorai.009G213400.1	320	5e-108	35300	0
Gh_A06G0170	Cotton_A_14893	1294	0	250	1.5e-06
Gh_D05G1955	Cotton_A_14893	742	0	1600	9.5e-105	Gorai.010G021600.1	773	0	250	5.6e-06
Gh_D06G0164	Cotton_A_14893	1292	0	300	5.4e-08	Gorai.010G021600.1	1568	0	11100	0
Gh_D12G0211	Cotton_A_14893	487	5e-163	350	1.2e-12
Gh_D05G2497	Cotton_A_14893	1102	0	450	8e-17
Gh_D06G0158	Cotton_A_14893	1472	0	150	0.1	Gorai.010G021600.1	1291	0	150	0.091
Gh_A08G0161	Cotton_A_15053	686	0	300	4.2e-10	Gorai.004G025300.1	1670	0	3100	1.3e-234
Gh_A10G0049	Cotton_A_15053	1397	0	350	2.7e-10	Gorai.009G116500.1	1403	0	450	1.2e-17
Gh_D05G1060	Cotton_A_15053	1609	0	2950	1.3e-216	Gorai.004G025300.1	645	0	150	0.048
Gh_D08G0220	Cotton_A_15053	688	0	300	2.7e-10	Gorai.004G025300.1	1671	0	104600	0
Gh_D10G0056	Cotton_A_15053	1390	0	350	1e-11	Gorai.009G116500.1	1395	0	450	6.9e-18
Gh_A05G3884	Cotton_A_15053	1679	0	450	2.1e-16	Gorai.009G116500.1	1670	0	450	2.4e-16
Gh_A03G0044	Cotton_A_16037	1473	0	2100	9.4e-150	Gorai.003G178600.1	1612	0	5000	0
Gh_A05G1582	Cotton_A_16445	1272	0	2350	7.1e-174	Gorai.010G002100.1	310	5e-98	600	4.2e-28
Gh_A06G0020	Cotton_A_16445	1126	0	850	4.4e-44	Gorai.010G002100.1	386	6e-126	2350	2.7e-169
Gh_D05G1759	Cotton_A_16445	1469	0	2700	1.4e-198	Gorai.010G002100.1	319	4e-100	7550	0
Gh_A05G1761	Cotton_A_16655	742	0	200	0.00097	Gorai.009G213500.1	1510	0	35300	0
Gh_A05G1762	Cotton_A_16655	588	0	500	5.5e-22
Gh_A06G0170	Cotton_A_16655	1162	0	200	0.00014	Gorai.009G213500.1	763	0	1150	1e-68
Gh_A06G0166	Cotton_A_16655	1112	0	1100	1.4e-66	Gorai.009G213400.1	293	2e-93	1150	1e-68
Gh_A12G0209	Cotton_A_16655	550	0	150	0.058	Gorai.009G213500.1	552	0	250	1.8e-06
Gh_D05G1955	Cotton_A_16655	762	0	200	0.00098	Gorai.009G213500.1	1543	0	35950	0
Gh_D06G0164	Cotton_A_16655	1162	0	750	6.4e-39	Gorai.007G214100.1	837	0	200	0.00014
Gh_D11G1939	Cotton_A_16655	819	0	300	1.3e-09	Gorai.009G213500.1	709	0	1000	2.9e-59
Gh_D12G0210	Cotton_A_16655	553	0	150	0.11	Gorai.009G213600.1	562	0	200	0.00059
Gh_D05G1956	Cotton_A_16655	584	0	950	8.9e-56	Gorai.010G021600.1	558	0	7550	0
Gh_D05G2497	Cotton_A_16655	1539	0	2450	1.2e-186	Gorai.009G275900.1	1498	0	33350	0
Gh_D06G0158	Cotton_A_16655	1092	0	200	0.00044	Gorai.009G275900.1	1065	0	150	0.091
Gh_A05G1582	Cotton_A_18231	966	0	750	2.7e-40	Gorai.009G192600.1	1221	0	35300	0
Gh_A06G0020	Cotton_A_18231	1560	0	2300	2.1e-166	Gorai.009G192600.1	1169	0	1000	3.2e-55
Gh_D05G1759	Cotton_A_18231	1178	0	1050	1.6e-59	Gorai.009G192600.1	1565	0	35950	0
Gh_A05G1176	Cotton_A_18954	1581	0	1500	6.3e-92	Gorai.009G147400.1	1560	0	35300	0
Gh_A10G0470	Cotton_A_18954	1309	0	600	7.2e-30	Gorai.009G147400.1	1298	0	2700	3.3e-207
Gh_D10G0493	Cotton_A_18954	1317	0	850	3.7e-46	Gorai.009G147400.1	1306	0	3200	1.1e-250
Gh_A13G0281	Cotton_A_19755	1578	0	1150	2.8e-70	Gorai.013G033000.1	1569	0	13600	0
Gh_D13G0300	Cotton_A_19755	1547	0	2050	2.3e-137	Gorai.013G033000.1	1616	0	21350	0
Gh_A07G0467	Cotton_A_19912	1556	0	1750	1.8e-114	Gorai.001G060600.1	1523	0	51800	0
Gh_D07G0532	Cotton_A_19912	1529	0	1800	2.5e-118	Gorai.001G060600.1	1548	0	60850	0
Gh_A13G0001	Cotton_A_20543	974	0	1300	4.4e-77	Gorai.013G001600.1	1018	0	13600	0
Gh_D13G0016	Cotton_A_20543	1423	0	1750	2.2e-111	Gorai.013G001600.1	1628	0	21350	0
Gh_A08G1149	Cotton_A_22944	1402	0	1000	3.6e-63	Gorai.004G155800.1	1389	0	29650	0
Gh_A11G0757	Cotton_A_22944	1214	0	200	9.9e-05	Gorai.007G094000.1	1518	0	51850	0
Gh_D08G1431	Cotton_A_22944	1453	0	900	3.1e-56	Gorai.004G155800.1	1531	0	104600	0
Gh_D11G0885	Cotton_A_22944	1220	0	250	6.3e-07	Gorai.004G155800.1	1238	0	1350	2.3e-84
Gh_A06G1462	Cotton_A_22973	1417	0	1300	1.2e-87	Gorai.010G200200.1	706	0	450	1.5e-17
Gh_D06G1794	Cotton_A_22973	1017	0	150	0.12	Gorai.010G200300.1	1017	0	200	0.00029
Gh_D06G1795	Cotton_A_22973	719	0	850	1.5e-49	Gorai.010G200300.1	725	0	38550	0
Gh_D06G2361	Cotton_A_22973	994	0	550	4.7e-23	Gorai.011G272300.1	844	0	150	0.053
Gh_A05G0776	Cotton_A_22974	614	0	200	0.0002	Gorai.009G095600.1	1383	0	10400	0
Gh_A06G1461	Cotton_A_22974	1503	0	1300	1.2e-87	Gorai.010G199900.1	1106	0	450	1.5e-17
Gh_A06G1462	Cotton_A_22974	1014	0	150	0.088	Gorai.010G199900.1	783	0	150	0.027
Gh_D06G1794	Cotton_A_22974	1391	0	850	1.5e-49	Gorai.010G199900.1	1056	0	38550	0
Gh_D06G1795	Cotton_A_22974	534	0	200	0.00068
Gh_A11G0221	Cotton_A_23202	177	6e-60	350	2.2e-14	Gorai.008G253500.1	179	2e-60	650	9.2e-31
Gh_A12G2124	Cotton_A_23202	197	8e-68	850	2e-46	Gorai.008G253500.1	196	4e-67	8050	0
Gh_D11G0235	Cotton_A_23202	175	6e-59	350	3e-14	Gorai.008G253500.1	176	2e-59	600	2e-27
Gh_D12G2304	Cotton_A_23202	196	3e-67	1100	3.3e-66	Gorai.007G025800.1	176	2e-59	650	5.8e-32
Gh_A05G1761	Cotton_A_24355	619	0	250	7.4e-07	Gorai.009G275900.1	731	0	1750	1.8e-117
Gh_A06G0170	Cotton_A_24355	780	0	200	0.00026	Gorai.010G021600.1	1540	0	3000	4.6e-231
Gh_D05G1955	Cotton_A_24355	639	0	250	4.2e-07	Gorai.009G275900.1	748	0	4100	0
Gh_D06G0164	Cotton_A_24355	780	0	250	4e-08	Gorai.009G275900.1	1142	0	1250	4.4e-76
Gh_D11G1939	Cotton_A_24355	1401	0	850	1.4e-49	Gorai.009G275900.1	794	0	300	2.3e-09
Gh_A11G3111	Cotton_A_24355	1432	0	150	0.11	Gorai.007G214100.1	1471	0	150	0.11
Gh_D05G2497	Cotton_A_24355	756	0	150	0.074	Gorai.010G021600.1	1174	0	400	5.6e-13
Gh_D08G0018	Cotton_A_26114	1148	0	150	0.021	Gorai.011G272200.1	615	0	150	0.091
Gh_D08G0019	Cotton_A_26114	226	3e-71	150	0.031	Gorai.004G001900.1	246	8e-76	550	2.5e-25
Gh_D08G0020	Cotton_A_26114	1092	0	1100	1.2e-58	Gorai.004G002500.1	1224	0	550	2.5e-25
Gh_A08G2564	Cotton_A_26114	846	0	150	0.055	Gorai.011G272500.1	613	0	150	0.069
Gh_D08G0013	Cotton_A_26115	383	8e-117	150	0.021
Gh_D08G0018	Cotton_A_26115	1150	0	150	0.031	Gorai.004G002600.1	258	1e-79	700	7.6e-34
Gh_D08G0019	Cotton_A_26115	265	8e-85	1100	1.2e-58	Gorai.004G002600.1	381	2e-137	104600	0
Gh_A08G2570	Cotton_A_26115	1199	0	1000	1.9e-51	Gorai.004G002600.1	258	1e-79	1000	9.8e-52
Gh_D08G0012	Cotton_A_26116	292	1e-93	150	0.031	Gorai.004G002500.1	879	0	700	7.6e-34
Gh_D08G0018	Cotton_A_26116	399	3e-129	1100	1.2e-58	Gorai.004G002500.1	2709	0	104600	0
Gh_A08G2570	Cotton_A_26116	386	2e-124	200	6.2e-05	Gorai.004G001900.1	1390	0	150	0.039
Gh_D08G0012	Cotton_A_26117	328	5e-109	150	0.021	Gorai.004G002600.1	280	1e-90	150	0.021
Gh_A08G2570	Cotton_A_26117	346	4e-111	150	0.055	Gorai.011G272300.1	620	0	150	0.069
Gh_D08G0012	Cotton_A_26123	292	8e-91	1100	1.2e-58	Gorai.004G001900.1	1043	0	104600	0
Gh_A08G2564	Cotton_A_26123	293	2e-91	1000	1.9e-51	Gorai.004G001900.1	1113	0	1000	9.8e-52
Gh_A08G2564	Cotton_A_26124	1339	0	200	6.2e-05	Gorai.004G002600.1	241	1e-75	150	0.039
Gh_A09G0896	Cotton_A_26289	1431	0	1300	2.2e-80	Gorai.006G111200.1	1401	0	19550	0
Gh_D09G0922	Cotton_A_26289	1407	0	1350	1.7e-81	Gorai.006G111200.1	1422	0	21550	0
Gh_A08G0161	Cotton_A_26615	1668	0	900	2.7e-49
Gh_D05G1060	Cotton_A_26615	642	0	200	5.5e-05	Gorai.009G116500.1	1611	0	14850	0
Gh_D08G0220	Cotton_A_26615	1664	0	1200	3.2e-71
Gh_A02G0947	Cotton_A_27395	768	0	350	1.4e-15	Gorai.003G074100.1	1519	0	4600	0
Gh_D03G0815	Cotton_A_27395	759	0	350	1.6e-14	Gorai.003G074100.1	1560	0	8050	0
Gh_A07G1432	Cotton_A_28587	1566	0	800	4.5e-44
Gh_D07G1529	Cotton_A_28587	1551	0	850	3.2e-53
Gh_A11G0221	Cotton_A_28742	193	4e-66	950	4.5e-50	Gorai.007G025800.1	193	4e-66	12950	0
Gh_A12G2124	Cotton_A_28742	175	6e-59	250	5.2e-06	Gorai.007G025800.1	175	6e-59	300	3.1e-10
Gh_D11G0235	Cotton_A_28742	195	7e-67	950	1.8e-49	Gorai.007G025800.1	195	7e-67	64250	0
Gh_A06G1331	Cotton_A_29458	1674	0	900	7.8e-63	Gorai.010G183500.1	1642	0	10800	0
Gh_D06G1660	Cotton_A_29458	1640	0	900	4.5e-60	Gorai.010G183500.1	1664	0	38550	0
Gh_D10G1396	Cotton_A_30414	61.2	2e-14	600	4.1e-31	Gorai.011G157200.1	55.1	8e-11	82800	0
Gh_D10G1396	Cotton_A_30414	61.2	2e-14	600	4.1e-31	Gorai.011G157100.1	134	3e-43	300	2.7e-08
Gh_A01G1385	Cotton_A_31274	315	1e-111	150	0.0087
Gh_A01G1385	Cotton_A_31277	315	1e-111	350	2.1e-14
Gh_A08G0882	Cotton_A_35466	2823	0	250	3.1e-06	Gorai.007G011200.1	2365	0	350	4.5e-13
Gh_D08G1072	Cotton_A_35466	2771	0	250	8.1e-06	Gorai.007G011200.1	2348	0	550	6.6e-25
Gh_D11G2004	Cotton_A_36345	1553	0	200	2.9e-05	Gorai.007G221100.1	1565	0	11250	0
Gh_A07G1757	Cotton_A_37979	1215	0	250	1.6e-06	Gorai.001G224300.1	1556	0	23650	0
Gh_A11G1366	Cotton_A_37979	1008	0	150	0.084	Gorai.001G224300.1	1268	0	3000	1.5e-241
Gh_D07G1962	Cotton_A_37979	1219	0	150	0.12	Gorai.001G224300.1	1573	0	21650	0
Gh_D11G1511	Cotton_A_37979	1020	0	150	0.086	Gorai.001G224300.1	1280	0	2850	6.7e-225
Gh_A05G1808						Gorai.009G218000.1	1550	0	35300	0
Gh_A05G1761						Gorai.009G213600.1	573	0	150	0.0024
Gh_A05G1176						Gorai.013G223900.1	739	0	150	0.052
Gh_A05G1760						Gorai.009G213500.1	266	6e-82	150	0.0024
Gh_A05G1581						Gorai.010G002000.1	129	4e-36	600	4.2e-28
Gh_A06G0020						Gorai.010G002000.1	1546	0	450	1.3e-19
Gh_A06G1461						Gorai.010G200100.1	286	2e-92	150	0.027
Gh_A06G1462						Gorai.011G272100.1	904	0	150	0.046
Gh_A08G1590						Gorai.004G205700.1	702	0	150	0.036
Gh_A08G1591						Gorai.008G115600.1	587	0	350	1.7e-13
Gh_A10G0304						Gorai.011G035300.1	1478	0	23750	0
Gh_A10G2027						Gorai.011G272000.1	1062	0	200	0.00053
Gh_A11G0092						Gorai.007G011200.1	2680	0	12950	0
Gh_A12G2187						Gorai.008G260600.1	310	5e-94	8050	0
Gh_A12G2187						Gorai.008G260500.1	1655	0	150	0.012
Gh_A13G1017						Gorai.013G140200.1	244	3e-85	24400	0
Gh_D06G1476						Gorai.010G163700.1	1584	0	38550	0
Gh_D06G1476						Gorai.011G035300.1	954	0	950	3.5e-50
Gh_D03G0815						Gorai.008G260500.1	815	0	500	8.3e-19
Gh_D12G2367						Gorai.008G260600.1	320	2e-97	4950	0
Gh_D08G0012						Gorai.011G272100.1	530	5e-179	150	0.091
Gh_D08G0019						Gorai.004G002500.1	265	3e-82	150	0.021
Gh_D08G1900						Gorai.008G115600.1	600	0	400	3.2e-15
Gh_D08G0020						Gorai.004G001900.1	1133	0	150	0.021
Gh_D08G0020						Gorai.011G272300.1	679	0	150	0.091
Gh_D11G0095						Gorai.007G011200.1	2687	0	64250	0
Gh_D02G0889						Gorai.009G218000.1	1222	0	700	2.1e-41
Gh_D05G2004						Gorai.009G218000.1	1562	0	35950	0
Gh_D09G0438						Gorai.006G065800.1	1605	0	3400	2.3e-291
Gh_D11G2004						Gorai.009G218000.1	1051	0	1000	2.9e-59
Gh_D06G1660						Gorai.010G183400.6	377	9e-114	350	1.3e-11
Gh_D06G1794						Gorai.010G200200.1	941	0	150	0.12
Gh_D10G0306						Gorai.011G035300.1	1577	0	82800	0
Gh_D13G1265						Gorai.013G140200.1	250	1e-87	28700	0

## Sheet: G.barbadense
ID	Orthologous genes in G. arboreum	blastp_score(Ga)	blastp_e-value(Ga)	block_score(Ga)	block_e-value(Ga)	Orthologous genes in G. raimondii	blastp_score(Gr)	blastp_e-value(Gr)	block_score(Gr)	block_e-value(Gr)
GB_A01G2355	Cotton_A_13434	235	4e-74	800	2.3e-44	Gorai.004G206800.1	126	4e-33	150	0.12
GB_A01G2355	Cotton_A_00534	204	6e-69	12050	0	Gorai.006G156500.1	237	2e-73	2150	1.6e-157
GB_A01G2355	Cotton_A_09963	122	1e-32	150	0.11
GB_A02G1070	Cotton_A_27395	773	0	350	2.8e-16	Gorai.003G074100.1	1524	0	5050	0
GB_A02G1070						Gorai.008G260500.1	810	0	450	2.5e-18
GB_A02G0887	Cotton_A_10921	1544	0	550	1.1e-31	Gorai.005G099900.1	1527	0	36850	0
GB_A02G0887						Gorai.009G218000.1	1213	0	1100	5.9e-68
GB_A03G0086	Cotton_A_16037	1477	0	2050	2.3e-143	Gorai.003G178600.1	1613	0	30150	0
GB_A03G0306	Cotton_A_04139	1585	0	6300	0	Gorai.003G154100.1	1556	0	30150	0
GB_A05G0240	Cotton_A_11161	1834	0	3850	2e-318	Gorai.004G280300.1	1838	0	3900	1.3e-322
GB_A05G0240	Cotton_A_14510	1822	0	1250	7.4e-77	Gorai.009G025200.1	2111	0	45600	0
GB_A05G1795	Cotton_A_04621	441	3e-160	6450	0	Gorai.004G034100.1	115	7e-29	150	0.043
GB_A05G1795	Cotton_A_06799	123	2e-32	150	0.051
GB_A05G1795	Cotton_A_03725	120	3e-31	200	0.00075
GB_A05G2122	Cotton_A_35816	1553	0	300	1.8e-09	Gorai.005G099900.1	1225	0	3650	9.8e-303
GB_A05G2122	Cotton_A_10921	1228	0	450	1.5e-21	Gorai.007G221100.1	1068	0	500	4.1e-21
GB_A05G2122						Gorai.009G218000.1	1550	0	98700	0
GB_A05G2076	Cotton_A_08666	186	2e-54	4400	0	Gorai.007G214100.1	196	2e-57	250	1.9e-06
GB_A05G2076	Cotton_A_16655	263	2e-83	200	0.00094	Gorai.009G213500.1	183	5e-53	98700	0
GB_A05G2076	Cotton_A_24355	194	1e-57	250	7e-07	Gorai.009G275900.1	266	4e-83	2100	1e-145
GB_A05G2076						Gorai.010G021100.1	216	5e-66	7700	0
GB_A05G2077	Cotton_A_08667	1536	0	4400	0	Gorai.008G024400.1	490	6e-163	200	0.00057
GB_A05G2077	Cotton_A_08666	588	0	700	6.4e-37	Gorai.009G213600.1	1485	0	98700	0
GB_A05G2077	Cotton_A_16655	590	0	500	3.5e-22
GB_A05G2077	Cotton_A_10766	644	0	300	2.2e-08
GB_A05G1136	Cotton_A_15053	1736	0	3000	9.4e-223	Gorai.009G116500.1	1726	0	98700	0
GB_A05G1136	Cotton_A_26615	686	0	150	0.09	Gorai.011G006000.1	1403	0	400	6.5e-14
GB_A05G1136	Cotton_A_10230	1377	0	450	8.8e-17
GB_A05G1423	Cotton_A_02647	1558	0	8000	0	Gorai.009G146000.1	1530	0	98700	0
GB_A05G1423	Cotton_A_18889	1291	0	1000	1.4e-57	Gorai.011G061400.1	1279	0	1650	3e-110
GB_A05G1438	Cotton_A_18954	1581	0	1600	9.3e-101	Gorai.009G147400.1	1560	0	98700	0
GB_A05G1438	Cotton_A_08556	1391	0	900	3.1e-50	Gorai.011G056000.1	1385	0	650	7e-30
GB_A05G1438						Gorai.013G223900.1	739	0	150	0.051
GB_A05G1868	Cotton_A_18231	312	2e-102	1000	7e-56	Gorai.009G192600.1	397	9e-134	98700	0
GB_A05G1868	Cotton_A_16445	402	2e-137	2800	6.5e-210	Gorai.010G002100.1	312	1e-103	7700	0
GB_A05G2075	Cotton_A_14893	551	0	1450	8e-92	Gorai.009G213400.1	317	6e-105	98700	0
GB_A05G2075						Gorai.009G275900.1	573	0	150	0.089
GB_A05G2668	Cotton_A_16655	1566	0	2700	3.6e-211	Gorai.009G275900.1	1491	0	98700	0
GB_A05G2668	Cotton_A_08666	771	0	650	3.9e-34	Gorai.009G213500.1	769	0	150	0.012
GB_A05G2668	Cotton_A_24355	764	0	150	0.04	Gorai.010G021600.1	1179	0	450	1.8e-17
GB_A05G2668	Cotton_A_10766	661	0	150	0.078
GB_A05G2668	Cotton_A_14893	1105	0	500	1.7e-21
GB_A05G0937	Cotton_A_12899	1153	0	2950	1.3e-222	Gorai.009G095600.1	1052	0	45600	0
GB_A05G0937						Gorai.010G200300.1	523	3e-177	300	2.4e-09
GB_A05G1867	Cotton_A_18231	684	0	200	7.7e-05	Gorai.010G002000.1	677	0	7700	0
GB_A05G4461	Cotton_A_20331	1485	0	1700	3.7e-110	Gorai.012G000900.1	1586	0	27850	0
GB_A06G0202	Cotton_A_16655	1165	0	950	3.2e-52	Gorai.007G214100.1	838	0	200	0.00028
GB_A06G0202	Cotton_A_08666	766	0	450	2.4e-17	Gorai.009G275900.1	1143	0	1450	8.8e-89
GB_A06G0202	Cotton_A_24355	783	0	200	0.00025	Gorai.010G021600.1	1537	0	37650	0
GB_A06G0202	Cotton_A_14888	1515	0	350	1.8e-11	Gorai.010G021100.1	910	0	250	6.8e-06
GB_A06G0202	Cotton_A_14893	1298	0	350	2.4e-10
GB_A06G0018	Cotton_A_18231	1565	0	2200	8.4e-187	Gorai.009G192600.1	1172	0	8000	0
GB_A06G0018	Cotton_A_16445	1129	0	1100	1.7e-60	Gorai.010G002100.1	389	3e-125	37650	0
GB_A06G0018						Gorai.010G002000.1	1551	0	400	1.6e-16
GB_A06G0196	Cotton_A_08666	738	0	2100	1.3e-146	Gorai.009G213500.1	734	0	8000	0
GB_A06G0196	Cotton_A_16655	1087	0	200	0.00011	Gorai.010G021100.1	962	0	37650	0
GB_A06G0196	Cotton_A_14888	1293	0	350	2.4e-10	Gorai.010G021600.1	1288	0	150	0.1
GB_A06G0196	Cotton_A_14893	1496	0	150	0.044
GB_A06G1798	Cotton_A_29458	1677	0	950	1.4e-67	Gorai.010G183500.1	1646	0	25500	0
GB_A06G1798						Gorai.010G183400.6	373	3e-111	150	0.036
GB_A06G1945	Cotton_A_13495	833	0	350	1.7e-13	Gorai.010G200200.1	946	0	25500	0
GB_A06G1945	Cotton_A_22974	1480	0	1350	5.3e-90	Gorai.010G199900.1	1031	0	600	3.1e-29
GB_A06G1946	Cotton_A_13490	620	0	350	1.7e-13	Gorai.010G200300.1	1006	0	25500	0
GB_A06G1946	Cotton_A_22973	1008	0	1350	5.3e-90	Gorai.010G200000.1	501	8e-174	600	3.1e-29
GB_A06G1946	Cotton_A_22974	711	0	300	1.6e-08	Gorai.010G199900.1	658	0	150	0.12
GB_A06G1946						Gorai.011G272100.1	656	0	150	0.061
GB_A06G1527						Gorai.010G163700.1	1542	0	350	2e-13
GB_A06G1527						Gorai.011G035300.1	951	0	200	0.00067
GB_A07G2292	Cotton_A_37979	1220	0	250	1.2e-06	Gorai.001G224300.1	1556	0	9750	0
GB_A07G2292	Cotton_A_03725	1302	0	1850	3.9e-136	Gorai.007G164000.1	1288	0	1600	2.4e-111
GB_A07G1683	Cotton_A_28587	1573	0	900	4.4e-52	Gorai.001G182200.1	1495	0	150	0.12
GB_A08G1631	Cotton_A_22944	1463	0	1000	2.9e-61	Gorai.004G155800.1	1514	0	65050	0
GB_A08G1631	Cotton_A_10948	1228	0	150	0.017
GB_A08G2143	Cotton_A_09963	1602	0	3250	9.4e-272	Gorai.004G206800.1	1579	0	65050	0
GB_A08G2859	Cotton_A_11161	1621	0	700	1.6e-35	Gorai.004G280300.1	2098	0	65050	0
GB_A08G2859	Cotton_A_14510	2062	0	2800	2.2e-201	Gorai.009G025200.1	1833	0	600	3.1e-27
GB_A08G2910	Cotton_A_03171	1224	0	1000	1.6e-57	Gorai.004G284900.1	1414	0	65050	0
GB_A08G2910	Cotton_A_11860	1440	0	3350	9.4e-255
GB_A08G0013	Cotton_A_26123	293	4e-89	750	1.1e-37	Gorai.004G001900.1	1257	0	39400	0
GB_A08G0013						Gorai.004G002600.1	241	2e-73	500	1.7e-21
GB_A08G0013						Gorai.004G002500.1	1187	0	450	3.1e-18
GB_A08G0217	Cotton_A_15053	687	0	300	5.7e-10	Gorai.004G025300.1	1666	0	39400	0
GB_A08G0217	Cotton_A_26615	1671	0	1000	1.6e-54
GB_A08G0299	Cotton_A_06799	1185	0	5200	0	Gorai.004G034100.1	1369	0	39400	0
GB_A08G1207	Cotton_A_02434	2252	0	400	8.1e-16	Gorai.004G118300.1	1971	0	1150	7.9e-73
GB_A08G1207	Cotton_A_35466	2716	0	350	2.6e-11	Gorai.004G118400.1	723	0	150	0.12
GB_A08G1207						Gorai.007G011200.1	2255	0	450	7.7e-19
GB_A09G1241	Cotton_A_26289	1433	0	1350	3.3e-83	Gorai.006G111200.1	1402	0	20050	0
GB_A09G1672	Cotton_A_13434	1452	0	3250	2e-253	Gorai.006G156500.1	1494	0	2800	1.8e-211
GB_A09G1672	Cotton_A_00534	119	2e-32	400	2.8e-16
GB_A09G0673						Gorai.006G065800.1	1585	0	700	6.2e-36
GB_A10G0055	Cotton_A_15053	1397	0	350	9.8e-12	Gorai.009G116500.1	1402	0	450	4.3e-18
GB_A10G0055	Cotton_A_10230	1648	0	3100	6e-234	Gorai.011G006000.1	1655	0	30400	0
GB_A10G0518	Cotton_A_18954	1308	0	700	7.4e-36	Gorai.009G147400.1	1295	0	3100	6.3e-244
GB_A10G0518	Cotton_A_08556	1558	0	4450	0	Gorai.011G056000.1	1548	0	30400	0
GB_A10G0567	Cotton_A_02647	1281	0	2150	4.8e-159	Gorai.009G146000.1	1271	0	3100	6.3e-244
GB_A10G0567	Cotton_A_11860	753	0	150	0.12	Gorai.011G061400.1	1505	0	30400	0
GB_A10G0567	Cotton_A_18889	1562	0	1950	1.2e-139
GB_A10G0336	Cotton_A_03979	1537	0	6800	0	Gorai.010G163700.1	963	0	900	1.4e-46
GB_A10G0336						Gorai.011G035300.1	1563	0	30400	0
GB_A10G2664	Cotton_A_13489	1330	0	150	0.023	Gorai.010G200100.1	239	3e-71	400	3.2e-17
GB_A10G2664	Cotton_A_13490	1427	0	150	0.023	Gorai.011G272400.1	924	0	13800	0
GB_A10G2664	Cotton_A_13491	1242	0	150	0.057	Gorai.011G272300.1	1109	0	2500	2.2e-186
GB_A10G2664	Cotton_A_13493	408	4e-131	150	0.057	Gorai.011G272200.1	1280	0	2000	2.8e-140
GB_A10G2664	Cotton_A_13488	236	4e-72	1800	5.3e-129	Gorai.011G272100.1	1420	0	700	3.5e-36
GB_A10G2664	Cotton_A_22974	878	0	450	2.6e-20	Gorai.011G272000.1	1404	0	550	8.8e-27
GB_A10G2664						Gorai.011G272500.1	969	0	250	9.4e-08
GB_A10G2665	Cotton_A_13488	193	3e-57	150	0.023	Gorai.011G272500.1	1391	0	13800	0
GB_A10G2665	Cotton_A_13489	1020	0	150	0.023	Gorai.011G272400.1	1372	0	2500	2.2e-186
GB_A10G2665	Cotton_A_13490	1031	0	150	0.057	Gorai.011G272300.1	1385	0	2000	2.8e-140
GB_A10G2665	Cotton_A_13491	954	0	150	0.057	Gorai.011G272200.1	1087	0	700	3.5e-36
GB_A10G2665	Cotton_A_13500	723	0	1800	5.3e-129	Gorai.011G272100.1	1086	0	550	8.8e-27
GB_A10G2665						Gorai.011G272000.1	1050	0	300	2.6e-12
GB_A11G1543	Cotton_A_37979	1023	0	150	0.082	Gorai.001G224300.1	1282	0	3200	1.2e-257
GB_A11G1543	Cotton_A_03725	1570	0	6450	0	Gorai.007G164000.1	1506	0	90600	0
GB_A11G0882	Cotton_A_22944	1212	0	250	2.8e-07	Gorai.004G155800.1	1229	0	1400	1.1e-90
GB_A11G0882	Cotton_A_10948	1533	0	1150	1.2e-64	Gorai.007G094000.1	1516	0	90600	0
GB_A11G0103	Cotton_A_02434	2697	0	5400	0	Gorai.004G118300.1	1790	0	400	1.1e-15
GB_A11G0103						Gorai.007G011200.1	2677	0	90600	0
GB_A11G0241	Cotton_A_28742	193	4e-66	1050	8.8e-58	Gorai.007G025800.1	193	1e-64	90600	0
GB_A11G0241	Cotton_A_23202	177	6e-60	400	5.7e-16	Gorai.008G253500.1	179	7e-59	650	4.3e-30
GB_A11G0241	Cotton_A_13261	177	6e-60	400	1.1e-14
GB_A11G2044	Cotton_A_08666	309	2e-98	450	2.3e-22	Gorai.007G214100.1	754	0	90600	0
GB_A11G2044	Cotton_A_16655	397	2e-132	200	3.7e-05	Gorai.009G213500.1	305	1e-95	450	4e-22
GB_A11G2044	Cotton_A_24355	767	0	1250	4.5e-83	Gorai.009G275900.1	408	3e-135	150	0.068
GB_A11G2044	Cotton_A_14888	421	6e-142	250	1.9e-09	Gorai.010G021600.1	419	2e-139	200	6.2e-05
GB_A11G2360	Cotton_A_36345	1565	0	200	4.9e-05	Gorai.007G221100.1	1559	0	6200	0
GB_A11G2360						Gorai.009G218000.1	1053	0	500	9.3e-22
GB_A12G2710	Cotton_A_13191	1508	0	3300	2.3e-254	Gorai.003G074100.1	772	0	500	4.9e-20
GB_A12G2710						Gorai.008G260600.1	234	1e-65	84450	0
GB_A12G2710						Gorai.008G260500.1	1481	0	150	0.018
GB_A12G2644	Cotton_A_23202	197	8e-68	1700	5.9e-116	Gorai.007G025800.1	175	2e-57	900	1.6e-49
GB_A12G2644	Cotton_A_13261	197	8e-68	3300	2.3e-254	Gorai.008G253500.1	196	1e-65	84450	0
GB_A12G1252	Cotton_A_03375	1551	0	1950	1.2e-134	Gorai.008G115400.1	1540	0	84450	0
GB_A12G1252	Cotton_A_03376	1252	0	300	1.4e-09	Gorai.008G115500.1	1261	0	250	5.7e-07
GB_A12G1253	Cotton_A_03376	1566	0	1950	1.2e-134	Gorai.008G115500.1	1525	0	84450	0
GB_A12G1253	Cotton_A_03375	1257	0	600	1.4e-28	Gorai.008G115400.1	1254	0	650	1.9e-31
GB_A12G1253	Cotton_A_03377	838	0	300	1.4e-09	Gorai.008G115600.1	854	0	250	5.7e-07
GB_A12G1254	Cotton_A_03377	661	0	1950	1.2e-134	Gorai.008G115600.1	627	0	84450	0
GB_A12G1254	Cotton_A_03376	365	7e-121	600	1.4e-28	Gorai.008G115500.1	372	7e-122	650	1.9e-31
GB_A12G0219	Cotton_A_08666	545	0	300	1.5e-09	Gorai.008G024400.1	778	0	12250	0
GB_A12G0219	Cotton_A_16655	553	0	150	0.063	Gorai.009G213500.1	545	0	250	2.1e-06
GB_A12G0219	Cotton_A_10767	937	0	3300	2.3e-261
GB_A12G0219	Cotton_A_10766	1079	0	550	4.4e-25
GB_A12G0218	Cotton_A_08667	649	0	300	1.5e-09	Gorai.009G213600.1	636	0	250	2.1e-06
GB_A12G0218	Cotton_A_10766	1573	0	3300	2.3e-261	Gorai.010G021600.1	639	0	300	3.2e-10
GB_A12G0218	Cotton_A_10767	960	0	300	1.1e-09
GB_A13G2332	Cotton_A_03171	1556	0	6800	0	Gorai.004G284900.1	1300	0	800	1.2e-40
GB_A13G2332	Cotton_A_11860	1265	0	700	4.8e-34	Gorai.013G223900.1	1540	0	24850	0
GB_A13G1546						Gorai.013G140200.1	248	3e-85	24850	0
GB_A13G0015	Cotton_A_20543	1254	0	1800	1.6e-115	Gorai.013G001600.1	1346	0	22850	0
GB_A13G0305	Cotton_A_19755	1476	0	2050	1.1e-140	Gorai.013G033000.1	1465	0	22850	0
GB_D07G0592	Cotton_A_19912	1482	0	1800	5.4e-117	Gorai.001G060600.1	1503	0	67250	0
GB_D07G2252	Cotton_A_37979	1220	0	250	6.7e-07	Gorai.001G224300.1	1575	0	20900	0
GB_D07G2252	Cotton_A_03725	1312	0	2000	1.3e-148	Gorai.007G164000.1	1298	0	1650	2.2e-113
GB_D07G1692	Cotton_A_28587	1548	0	900	5.5e-51	Gorai.001G182200.1	1516	0	200	0.00019
GB_D11G1580	Cotton_A_37979	1035	0	150	0.086	Gorai.001G224300.1	1297	0	3550	2.9e-291
GB_D11G1580	Cotton_A_03725	1536	0	6150	0	Gorai.007G164000.1	1575	0	103050	0
GB_D03G1690	Cotton_A_04139	1565	0	6150	0	Gorai.003G154100.1	1580	0	39250	0
GB_D03G1907	Cotton_A_16037	1420	0	2150	5.7e-153	Gorai.003G178600.1	1615	0	39250	0
GB_D03G1906	Cotton_A_16037	436	1e-150	500	5.2e-20	Gorai.003G178600.1	444	3e-151	850	2.8e-46
GB_D03G1016	Cotton_A_27395	759	0	350	2.4e-14	Gorai.003G074100.1	1560	0	6500	0
GB_D03G1016						Gorai.008G260500.1	815	0	450	6.6e-17
GB_D12G2713	Cotton_A_13191	1560	0	3200	1.6e-244	Gorai.003G074100.1	802	0	500	5e-20
GB_D12G2713						Gorai.008G260600.1	319	2e-96	37950	0
GB_D12G2713						Gorai.008G260500.1	1578	0	150	0.018
GB_D05G0246	Cotton_A_11161	1805	0	3800	9.8e-312	Gorai.004G280300.1	1818	0	3850	3.2e-315
GB_D05G0246	Cotton_A_14510	1802	0	1200	1.4e-71	Gorai.009G025200.1	2129	0	46950	0
GB_D05G4059	Cotton_A_06799	982	0	300	9.7e-10	Gorai.004G034100.1	1134	0	300	1.9e-09
GB_D05G4059	Cotton_A_03725	1020	0	200	2.1e-05	Gorai.009G453100.1	1525	0	1550	5.6e-94
GB_D05G4059	Cotton_A_07447	1510	0	1350	1.7e-79
GB_D05G1121	Cotton_A_15053	1724	0	2950	3.9e-217	Gorai.004G025300.1	685	0	150	0.048
GB_D05G1121	Cotton_A_26615	682	0	150	0.094	Gorai.009G116500.1	1725	0	115900	0
GB_D05G1121	Cotton_A_10230	1380	0	500	1.5e-19	Gorai.011G006000.1	1406	0	400	3.9e-14
GB_D08G1208	Cotton_A_02434	2370	0	450	1e-19	Gorai.004G118400.1	731	0	82250	0
GB_D08G1208	Cotton_A_35466	2786	0	250	5.1e-06	Gorai.007G011200.1	2373	0	650	2.7e-32
GB_D08G1630	Cotton_A_22944	1456	0	950	1.1e-59	Gorai.004G155800.1	1536	0	82250	0
GB_D08G1630	Cotton_A_10948	1228	0	200	0.00035
GB_D08G2114	Cotton_A_09950	1480	0	3350	1.2e-275	Gorai.004G205600.1	1508	0	82250	0
GB_D08G2114						Gorai.004G205700.1	704	0	250	2.7e-06
GB_D08G2114						Gorai.008G115600.1	598	0	350	7.6e-13
GB_D08G2115	Cotton_A_03377	495	4e-166	250	3.5e-06	Gorai.004G205700.1	911	0	82250	0
GB_D08G2115	Cotton_A_09951	1346	0	3350	1.2e-275	Gorai.004G205600.1	811	0	200	0.00061
GB_D08G2128	Cotton_A_09963	1510	0	3350	1.2e-275	Gorai.004G206800.1	1527	0	82250	0
GB_D08G2849	Cotton_A_11161	1613	0	800	7.4e-42	Gorai.004G280300.1	2105	0	82250	0
GB_D08G2849	Cotton_A_14510	2039	0	2650	8e-187	Gorai.009G025200.1	1824	0	600	6.3e-27
GB_D08G2900	Cotton_A_03171	1307	0	1050	1.1e-60	Gorai.004G284900.1	1538	0	82250	0
GB_D08G2900	Cotton_A_11860	1452	0	3200	1.1e-244
GB_D08G0014	Cotton_A_26123	459	3e-150	1100	6.9e-60	Gorai.004G001900.1	1079	0	39450	0
GB_D08G0014	Cotton_A_26116	292	2e-90	200	0.00057	Gorai.004G002600.1	279	2e-86	500	9.1e-20
GB_D08G0014	Cotton_A_26117	327	6e-105	200	0.00024	Gorai.004G002500.1	1484	0	150	0.056
GB_D08G0020	Cotton_A_26114	1091	0	1100	6.9e-60	Gorai.004G002600.1	261	9e-80	39450	0
GB_D08G0020	Cotton_A_26115	1360	0	200	0.00057	Gorai.004G002500.1	2401	0	200	0.00092
GB_D08G0020	Cotton_A_26116	405	2e-131	200	0.00024
GB_D08G0224	Cotton_A_15053	693	0	300	4.7e-10	Gorai.004G025300.1	1676	0	39450	0
GB_D08G0224	Cotton_A_26615	1667	0	1200	1.7e-71
GB_D08G0307	Cotton_A_06799	1295	0	4900	0	Gorai.004G034100.1	1537	0	39450	0
GB_D11G0910	Cotton_A_22944	1222	0	250	2.8e-07	Gorai.004G155800.1	1239	0	1450	1.8e-94
GB_D11G0910	Cotton_A_10948	1523	0	1100	2.6e-60	Gorai.007G094000.1	1546	0	103050	0
GB_D11G0101	Cotton_A_02434	2681	0	5300	0	Gorai.004G118400.1	580	0	400	1.9e-15
GB_D11G0101						Gorai.007G011200.1	2699	0	103050	0
GB_D12G1238	Cotton_A_03377	1417	0	1800	5.9e-121	Gorai.004G205700.1	456	3e-151	250	2.6e-07
GB_D12G1238	Cotton_A_03376	839	0	650	3.3e-32	Gorai.008G115600.1	1556	0	49650	0
GB_D12G1238						Gorai.008G115500.1	845	0	150	0.003
GB_D13G2282	Cotton_A_03171	1536	0	6650	0	Gorai.004G284900.1	1303	0	850	5.7e-45
GB_D13G2282	Cotton_A_11860	1268	0	750	9.2e-39	Gorai.013G223900.1	1559	0	24850	0
GB_D02G0954	Cotton_A_10921	1506	0	500	3.7e-25	Gorai.005G099900.1	1561	0	48850	0
GB_D02G0954						Gorai.009G218000.1	1223	0	1100	7.2e-67
GB_D09G1535	Cotton_A_13434	1442	0	1700	3.1e-112	Gorai.006G156500.1	1529	0	66750	0
GB_D09G1535	Cotton_A_00534	123	8e-34	900	3.9e-52
GB_D09G1085	Cotton_A_26289	1427	0	1350	2.3e-81	Gorai.006G111200.1	1461	0	21050	0
GB_D09G0559	Cotton_A_36345	867	0	150	0.008	Gorai.006G065800.1	1608	0	5100	0
GB_D05G2100	Cotton_A_08666	1535	0	4300	0	Gorai.007G214100.1	706	0	250	1.4e-06
GB_D05G2100	Cotton_A_16655	764	0	200	0.0011	Gorai.009G213500.1	1547	0	115900	0
GB_D05G2100	Cotton_A_24355	641	0	250	5.1e-07	Gorai.009G275900.1	749	0	2200	2.7e-154
GB_D05G2100						Gorai.009G213600.1	588	0	150	0.00089
GB_D06G0199	Cotton_A_16655	1163	0	950	2.4e-52	Gorai.007G214100.1	837	0	200	0.00014
GB_D06G0199	Cotton_A_24355	780	0	200	0.00013	Gorai.009G275900.1	1144	0	1550	2.5e-98
GB_D06G0199	Cotton_A_14893	1293	0	200	0.00057	Gorai.010G021600.1	1570	0	52900	0
GB_D06G0199						Gorai.010G021100.1	909	0	150	0.085
GB_D11G0236	Cotton_A_28742	195	7e-67	1000	2.5e-53	Gorai.007G025800.1	195	2e-65	103050	0
GB_D11G0236	Cotton_A_23202	175	6e-59	400	8e-16	Gorai.008G253500.1	176	5e-58	650	7.1e-30
GB_D11G0236	Cotton_A_13261	175	6e-59	400	1.7e-14
GB_D11G2099	Cotton_A_08666	709	0	700	2.9e-37	Gorai.007G214100.1	1564	0	103050	0
GB_D11G2099	Cotton_A_16655	824	0	250	1.6e-07	Gorai.009G213500.1	707	0	1000	2.3e-59
GB_D11G2099	Cotton_A_24355	1405	0	1350	3.4e-87	Gorai.009G275900.1	798	0	250	2.4e-07
GB_D11G2099	Cotton_A_14888	857	0	550	2.1e-26	Gorai.010G021600.1	857	0	650	1.2e-32
GB_D11G2177	Cotton_A_36345	1553	0	200	2.8e-05	Gorai.007G221100.1	1563	0	103050	0
GB_D11G2177	Cotton_A_31278	185	6e-55	150	0.012	Gorai.009G218000.1	1050	0	1000	2.3e-59
GB_D12G2649	Cotton_A_23202	193	4e-66	1650	3e-111	Gorai.007G025800.1	174	7e-57	950	2.3e-52
GB_D12G2649	Cotton_A_13261	193	4e-66	3200	1.6e-244	Gorai.008G253500.1	194	6e-65	37950	0
GB_D12G1236	Cotton_A_03375	1522	0	1800	5.9e-121	Gorai.008G115400.1	1576	0	49650	0
GB_D12G1236	Cotton_A_03376	1254	0	300	3.1e-10	Gorai.008G115500.1	1261	0	1350	5e-88
GB_D12G1237	Cotton_A_03376	892	0	1800	5.9e-121	Gorai.008G115500.1	904	0	49650	0
GB_D12G1237	Cotton_A_03375	753	0	650	3.3e-32	Gorai.008G115600.1	516	3e-176	1350	5e-88
GB_D12G1237	Cotton_A_03377	530	0	300	3.1e-10	Gorai.008G115400.1	749	0	150	0.003
GB_D12G0235	Cotton_A_16655	207	3e-62	150	0.085	Gorai.008G024400.1	439	3e-151	31150	0
GB_D12G0235	Cotton_A_10767	406	4e-141	3300	1.4e-262	Gorai.010G021600.1	201	2e-59	400	2.2e-15
GB_D12G0235	Cotton_A_10766	447	7e-155	400	1.9e-16
GB_D12G0235	Cotton_A_14893	203	3e-61	350	5.5e-13
GB_D05G1433	Cotton_A_02647	813	0	8000	0	Gorai.009G146000.1	808	0	115900	0
GB_D05G1433	Cotton_A_18889	663	0	1050	8.6e-61	Gorai.011G061400.1	656	0	1650	1.2e-111
GB_D05G1447	Cotton_A_18954	1565	0	1650	5.9e-105	Gorai.009G147400.1	1575	0	115900	0
GB_D05G1447	Cotton_A_08556	1382	0	900	1.3e-49	Gorai.011G056000.1	1376	0	650	1.8e-30
GB_D05G1447						Gorai.013G223900.1	730	0	150	0.049
GB_D05G1893	Cotton_A_18231	1190	0	1050	3.7e-61	Gorai.009G192600.1	1579	0	115900	0
GB_D05G1893	Cotton_A_16445	1461	0	2750	6.5e-203	Gorai.010G002100.1	319	1e-98	7600	0
GB_D05G2099	Cotton_A_08666	281	8e-88	300	1.3e-09	Gorai.009G213400.1	474	2e-167	115900	0
GB_D05G2099	Cotton_A_14893	406	2e-136	1500	1.4e-95	Gorai.009G213500.1	280	3e-86	150	0.00089
GB_D05G2101	Cotton_A_08667	1526	0	4300	0	Gorai.009G213600.1	1495	0	115900	0
GB_D05G2101	Cotton_A_08666	578	0	800	5.3e-45	Gorai.010G021600.1	558	0	7600	0
GB_D05G2101	Cotton_A_16655	584	0	500	3.8e-22
GB_D05G2101	Cotton_A_10766	636	0	300	2.5e-08
GB_D05G2668	Cotton_A_16655	1535	0	2550	2.8e-192	Gorai.009G275900.1	1496	0	115900	0
GB_D05G2668	Cotton_A_08667	593	0	650	6.5e-35	Gorai.009G213600.1	584	0	150	0.013
GB_D05G2668	Cotton_A_24355	754	0	150	0.076	Gorai.010G021600.1	1169	0	450	2.8e-16
GB_D05G2668	Cotton_A_10766	665	0	200	0.00068
GB_D05G2668	Cotton_A_14893	1098	0	550	3.5e-31
GB_D05G0918	Cotton_A_12899	1481	0	2850	4.7e-213	Gorai.009G095600.1	1428	0	46950	0
GB_D06G0016	Cotton_A_18231	1552	0	2300	5.2e-199	Gorai.009G192600.1	1177	0	8050	0
GB_D06G0016	Cotton_A_16445	1130	0	1100	1.6e-61	Gorai.010G002100.1	397	2e-128	52900	0
GB_D06G0196	Cotton_A_08666	706	0	2050	3.8e-141	Gorai.009G213500.1	704	0	8050	0
GB_D06G0196	Cotton_A_16655	1010	0	150	0.021	Gorai.010G021100.1	974	0	52900	0
GB_D06G0196	Cotton_A_14888	1203	0	200	0.00057	Gorai.010G021600.1	1195	0	150	0.085
GB_D10G0055	Cotton_A_15053	1399	0	350	1.4e-10	Gorai.009G116500.1	1404	0	400	1.1e-14
GB_D10G0055	Cotton_A_10230	1616	0	3000	2.2e-220	Gorai.011G006000.1	1696	0	112900	0
GB_D10G0588	Cotton_A_02647	1286	0	3250	1e-264	Gorai.009G146000.1	1276	0	3100	6.9e-240
GB_D10G0588	Cotton_A_11860	759	0	150	0.071	Gorai.011G061400.1	1548	0	112900	0
GB_D10G0588	Cotton_A_18889	1536	0	1900	1.3e-132
GB_D10G0531	Cotton_A_18954	1319	0	700	2e-35	Gorai.009G147400.1	1308	0	3100	6.9e-240
GB_D10G0531	Cotton_A_08556	1543	0	4500	0	Gorai.011G056000.1	1577	0	112900	0
GB_D06G1641	Cotton_A_03979	942	0	150	0.034	Gorai.010G163700.1	1587	0	40200	0
GB_D06G1641						Gorai.011G035300.1	957	0	800	3.5e-41
GB_D06G1858	Cotton_A_29458	1640	0	900	3.7e-60	Gorai.010G183500.1	1667	0	40200	0
GB_D06G1858						Gorai.010G183400.6	377	2e-112	150	0.047
GB_D06G2011	Cotton_A_13495	855	0	450	7.6e-19	Gorai.010G200100.1	282	9e-90	40200	0
GB_D06G2011	Cotton_A_13499	317	1e-101	150	0.088	Gorai.010G200000.1	721	0	300	9.1e-10
GB_D06G2011	Cotton_A_22974	1382	0	300	3.3e-09	Gorai.010G200200.1	927	0	200	0.00029
GB_D06G2011						Gorai.011G272000.1	859	0	150	0.093
GB_D06G2011						Gorai.011G272300.1	847	0	200	0.00018
GB_D06G2012	Cotton_A_13493	187	5e-61	450	7.6e-19	Gorai.010G200200.1	225	6e-71	40200	0
GB_D06G2012	Cotton_A_13496	198	3e-61	150	0.088	Gorai.010G200100.1	282	5e-97	300	9.1e-10
GB_D06G2012	Cotton_A_22974	223	7e-70	1400	2.4e-93	Gorai.010G200300.1	308	6e-101	200	0.00029
GB_D06G2012	Cotton_A_22973	312	3e-104	300	3.3e-09	Gorai.011G272100.1	197	4e-59	150	0.093
GB_D06G2013	Cotton_A_13489	846	0	450	7.6e-19	Gorai.010G200300.1	1410	0	40200	0
GB_D06G2013	Cotton_A_13490	860	0	150	0.088	Gorai.010G200200.1	990	0	300	9.1e-10
GB_D06G2013	Cotton_A_22973	1385	0	1400	2.4e-93	Gorai.011G272500.1	902	0	150	0.093
GB_D06G2013	Cotton_A_22974	1372	0	150	0.11	Gorai.011G272100.1	897	0	200	0.00018
GB_D10G0341	Cotton_A_03979	1511	0	6850	0	Gorai.010G163700.1	960	0	1000	4.9e-54
GB_D10G0341						Gorai.011G035300.1	1573	0	112900	0
GB_D10G2623	Cotton_A_13489	1361	0	150	0.062	Gorai.010G200300.1	879	0	350	1.1e-13
GB_D10G2623	Cotton_A_13490	1483	0	150	0.046	Gorai.011G272400.1	921	0	112900	0
GB_D10G2623	Cotton_A_13491	1138	0	150	0.065	Gorai.011G272300.1	1095	0	2950	5.8e-238
GB_D10G2623	Cotton_A_13493	403	2e-137	150	0.0099	Gorai.011G272200.1	1300	0	1050	4.7e-60
GB_D10G2623	Cotton_A_13488	234	2e-73	1650	8.3e-120	Gorai.011G272100.1	1358	0	900	3.6e-51
GB_D10G2623						Gorai.011G272000.1	1484	0	750	1.2e-41
GB_D10G2623						Gorai.011G272500.1	966	0	600	9.4e-31
GB_D10G2624	Cotton_A_13488	209	9e-63	150	0.062	Gorai.011G272500.1	1451	0	112900	0
GB_D10G2624	Cotton_A_13489	1236	0	150	0.046	Gorai.011G272400.1	1343	0	2950	5.8e-238
GB_D10G2624	Cotton_A_13490	1289	0	150	0.065	Gorai.011G272300.1	1431	0	1050	4.7e-60
GB_D10G2624	Cotton_A_13491	1211	0	150	0.0099	Gorai.011G272200.1	1427	0	900	3.6e-51
GB_D10G2624	Cotton_A_13500	731	0	1650	8.3e-120	Gorai.011G272100.1	1496	0	750	1.2e-41
GB_D10G2624	Cotton_A_22974	874	0	300	6.4e-10	Gorai.011G272000.1	1303	0	400	5.4e-17
GB_D04G0002	Cotton_A_20331	1485	0	1500	3.1e-94	Gorai.012G000900.1	1586	0	39100	0
GB_D13G0300	Cotton_A_19755	1553	0	1950	8.4e-132	Gorai.013G033000.1	1592	0	38550	0
GB_D13G1464						Gorai.013G140200.1	252	1e-86	28450	0
GB_D13G2555						Gorai.013G257400.1	323	4e-103	150	0.043
GB_D13G0051	Cotton_A_20543	1428	0	1600	1.9e-100	Gorai.013G001600.1	1640	0	2300	7e-160
GB_A01G1899	Cotton_A_31277	317	8e-110	450	7.3e-24
GB_A01G1899	Cotton_A_31274	317	8e-110	200	0.00043
GB_A01G1900	Cotton_A_31278	313	2e-111	450	7.3e-24
GB_A01G1900	Cotton_A_31275	313	2e-111	200	0.00043
GB_A01G1901	Cotton_A_31279	239	8e-83	450	7.3e-24
GB_A01G1901	Cotton_A_31276	239	9e-81	200	0.00043
GB_A04G0033	Cotton_A_03725	1016	0	150	0.038
GB_A04G0033	Cotton_A_07447	1536	0	200	5.4e-05
GB_D12G0234	Cotton_A_08667	454	5e-152	400	9.8e-16
GB_D12G0234	Cotton_A_10766	1073	0	3300	1.4e-262
GB_D12G0234	Cotton_A_10767	926	0	200	0.00014
