# Supplementary material for: Genome-Wide Investigation and Co-Expression Network Analysis of SBT Family Gene in Gossypium
Source: Int J Mol Sci. 2023 Mar 17;24(6):5760. doi: 10.3390/ijms24065760 (PMC10056545; doi:10.3390/ijms24065760)
Supplement: Supplementary file 1 [file ijms-24-05760-s001.zip › TableS8.xlsx]

## Sheet: network
node1	node2	PCC	MR	Relationship
Gh_A09G0257	Gh_A10G2239	0.9298	28.2489	positive
Gh_A10G2239	Gh_D10G0377	0.9292	28.2843	positive
Gh_A01G1029	Gh_A10G0470	0.6755	53.4977	positive
Gh_A10G2239	Gh_D09G0503	0.95	11.7473	positive
Gh_A10G1510	Gh_A12G0941	0.9049	8.66025	positive
Gh_D09G2000	Gh_D12G1031	0.95	6.9282	positive
Gh_A02G1604	Gh_D12G1031	0.945	7.74597	positive
Gh_A10G2239	Gh_D11G0254	0.951	12.0416	positive
Gh_D06G1932	Gh_D12G1031	0.9288	29.7489	positive
Gh_A05G2114	Gh_A12G0941	0.9032	17.4356	positive
Gh_A03G0083	Gh_D12G1031	0.9544	4.24264	positive
Gh_A10G0470	Gh_A12G2553	0.6669	21.5407	positive
Gh_A10G0470	Gh_D09G1436	0.6525	2.64575	positive
Gh_A10G0093	Gh_A10G0470	0.7345	4	positive
Gh_A10G0470	Gh_D11G3271	0.6218	27.7128	positive
Gh_A10G0470	Gh_A12G2681	0.6407	19.3391	positive
Gh_A10G0470	Gh_D11G1534	0.6438	16.9706	positive
Gh_A10G0470	Gh_D04G1103	0.6044	9.79796	positive
Gh_A10G0470	Gh_D03G0109	0.7299	21.9545	positive
Gh_A10G0470	Gh_D05G1785	0.6424	13.4164	positive
Gh_A01G1728	Gh_D10G2586	0.8369	23.3666	positive
Gh_A10G2237	Gh_D05G2004	0.9219	19.4936	positive
Gh_A05G1808	Gh_D04G1504	0.867	18.3303	positive
Gh_D05G3021	Gh_D12G1031	0.8798	29.3258	positive
Gh_A05G1808	Gh_D10G2603	0.8347	11.3578	positive
Gh_A05G1808	Gh_D06G2295	0.8921	4.69042	positive
Gh_A08G0801	Gh_A10G2239	0.879	18.412	positive
Gh_A05G1808	Gh_A06G1197	0.8671	11.8322	positive
Gh_A09G2440	Gh_D10G0493	0.7866	5.91608	positive
Gh_A06G1420	Gh_D10G2586	0.9173	26.8328	positive
Gh_A06G1420	Gh_A10G2239	0.9524	10.3923	positive
Gh_A09G2137	Gh_D10G0493	0.8299	2.82843	positive
Gh_D10G2586	Gh_D13G2038	0.858	14.4222	positive
Gh_A10G2239	Gh_D13G2038	0.8567	24.0624	positive
Gh_D05G2004	Gh_D09G2139	0.8795	20.7846	positive
Gh_A01G1681	Gh_A12G0941	0.7295	45.3652	positive
Gh_D07G0019	Gh_D12G1031	0.891	19.5959	positive
Gh_A05G1808	Gh_D08G0161	0.7679	23.6854	positive
Gh_D02G1346	Gh_D12G1031	0.9253	26.8701	positive
Gh_A08G1149	Gh_D12G1031	0.9066	27.9285	positive
Gh_A01G1833	Gh_A10G2239	0.9306	24.7386	positive
Gh_A11G0236	Gh_A12G0941	0.9083	7.07107	positive
Gh_A11G3010	Gh_D10G0493	0.7696	25.4951	positive
Gh_A12G0941	Gh_D10G1286	0.8821	12	positive
Gh_A05G0291	Gh_A12G0941	0.8273	15.6205	positive
Gh_A08G1387	Gh_D05G2004	0.9148	10.198	positive
Gh_A11G3221	Gh_D05G2004	0.8899	19.5959	positive
Gh_D07G2351	Gh_D10G2586	0.8601	27.7128	positive
Gh_A12G0941	Gh_D04G1736	0.8982	21.4942	positive
Gh_A05G1808	Gh_A13G0791	0.9165	4	positive
Gh_D05G1733	Gh_D10G2586	0.8826	29.0861	positive
Gh_A10G0449	Gh_Sca005023G04	0.8621	24.6171	positive
Gh_D10G2586	Gh_D12G0691	0.87	11.6619	positive
Gh_A05G1808	Gh_A07G1947	0.789	29.2233	positive
Gh_A10G0105	Gh_A13G1684	0.7829	19.6214	positive
Gh_D05G2165	Gh_D10G2586	0.8952	15.8745	positive
Gh_A11G1278	Gh_D05G2004	0.8744	28.6182	positive
Gh_D11G0460	Gh_D12G1031	0.9207	29.95	positive
Gh_D04G0742	Gh_D05G2004	0.8386	29.6479	positive
Gh_D08G1360	Gh_D10G2586	0.9	14	positive
Gh_A10G2239	Gh_D08G1360	0.9041	14.9666	positive
Gh_A05G1808	Gh_D07G0750	0.8552	29.9333	positive
Gh_A13G1684	Gh_Sca005023G04	0.9639	1	positive
Gh_A10G2277	Gh_Sca005023G04	0.7809	23.4094	positive
Gh_A05G1445	Gh_Sca005023G04	0.808	12	positive
Gh_D08G2213	Gh_Sca005023G04	0.8495	18.8944	positive
Gh_A07G1418	Gh_A10G2239	0.9363	18.735	positive
Gh_A12G0941	Gh_D08G1342	0.8909	17.7482	positive
Gh_A10G2239	Gh_A12G1397	0.8928	12.4097	positive
Gh_A12G0941	Gh_D09G2081	0.8881	22.9783	positive
Gh_A05G1808	Gh_D07G0108	0.8428	20.4939	positive
Gh_A11G0378	Gh_D12G1031	0.937	15.748	positive
Gh_A12G2708	Gh_D12G1031	0.9358	19.2354	positive
Gh_D03G1568	Gh_D12G1031	0.9448	9.21954	positive
Gh_D11G3268	Gh_D12G1031	0.9245	24.8998	positive
Gh_A11G0393	Gh_D12G1031	0.9167	24.3721	positive
Gh_A02G1246	Gh_D12G1031	0.9335	28.775	positive
Gh_D04G1498	Gh_D12G1031	0.9428	11.7473	positive
Gh_D11G3137	Gh_D12G1031	0.9378	13.4907	positive
Gh_A03G0960	Gh_D12G1031	0.9614	3.87298	positive
Gh_A05G0834	Gh_D12G1031	0.9362	19.6723	positive
Gh_D12G1031	Gh_D12G2750	0.9041	20.4939	positive
Gh_D04G0626	Gh_D12G1031	0.8795	20.9762	positive
Gh_A11G2826	Gh_D12G1031	0.9227	12.1244	positive
Gh_D03G0119	Gh_D12G1031	0.9294	17.9444	positive
Gh_A13G0806	Gh_D12G1031	0.9349	17.8606	positive
Gh_A12G1937	Gh_D12G1031	0.9219	6.63325	positive
Gh_A10G2239	Gh_D11G1400	0.9348	20.8567	positive
Gh_A05G1808	Gh_D03G0466	0.8421	8.48528	positive
Gh_A10G2277	Gh_A13G1684	0.8112	2.44949	positive
Gh_A05G1445	Gh_A13G1684	0.8222	1.41421	positive
Gh_A13G1684	Gh_D03G0374	0.7779	24.0416	positive
Gh_A10G2239	Gh_D05G1954	0.8956	22.6053	positive
Gh_D01G1620	Gh_D10G0493	0.8285	5.74456	positive
Gh_D08G2109	Gh_D10G0493	0.7885	14.9666	positive
Gh_A12G0941	Gh_D10G2113	0.868	17.2337	positive
Gh_A09G2484	Gh_A12G0941	0.8448	17.7482	positive
Gh_A08G1305	Gh_A10G2239	0.9147	11.0905	positive
Gh_A12G0941	Gh_Sca005145G01	0.81	19.2873	positive
Gh_A08G1950	Gh_A12G0941	0.8713	21.9773	positive
Gh_A05G1516	Gh_A12G0941	0.8964	8.48528	positive
Gh_A06G0198	Gh_A12G0941	0.8405	8.7178	positive
Gh_A12G0941	Gh_D05G1456	0.83	28.2489	positive
Gh_A01G1736	Gh_A12G0941	0.8814	17.9722	positive
Gh_A12G0941	Gh_D05G2641	0.8456	10.9545	positive
Gh_A12G0941	Gh_D02G0920	0.8976	27.8747	positive
Gh_A03G0451	Gh_A12G0941	0.8535	25.3969	positive
Gh_A04G1123	Gh_A12G0941	0.8983	13.2288	positive
Gh_A03G0199	Gh_A10G2239	0.9255	11.4891	positive
Gh_A10G2239	Gh_D12G1438	0.9329	25.6125	positive
Gh_D05G0899	Gh_Sca005023G04	0.825	9.59166	positive
Gh_A10G2239	Gh_D11G0249	0.9399	25.219	positive
Gh_A11G1395	Gh_Sca005023G04	0.8476	21.8174	positive
Gh_A11G0004	Gh_D10G2586	0.8575	23.2379	positive
Gh_A05G1808	Gh_Sca005341G01	0.8579	17.2337	positive
Gh_A10G2239	Gh_D06G0045	0.9247	23.9792	positive
Gh_D12G1031	Gh_D13G1322	0.9329	21.3307	positive
Gh_A13G1684	Gh_D10G1657	0.7366	16.3095	positive
Gh_A10G1339	Gh_D10G0493	0.8486	2.64575	positive
Gh_A07G0811	Gh_A10G2239	0.954	7.34847	positive
Gh_D05G2843	Gh_D10G2586	0.9041	16.6132	positive
Gh_A01G0158	Gh_A05G1808	0.8169	11.8322	positive
Gh_A12G0941	Gh_D01G1459	0.9137	4.69042	positive
Gh_A12G0941	Gh_D05G0485	0.8133	13	positive
Gh_A05G1808	Gh_A07G0816	0.8574	16.9706	positive
Gh_A11G1380	Gh_D10G2586	0.9244	12.2474	positive
Gh_A05G2619	Gh_D10G2586	0.9189	3.74166	positive
Gh_A12G1397	Gh_D10G2586	0.8659	29.6648	positive
Gh_D05G1954	Gh_D10G2586	0.9099	6.7082	positive
Gh_A10G0538	Gh_D10G2586	0.7933	19.2094	positive
Gh_A08G1305	Gh_D10G2586	0.9305	2.44949	positive
Gh_A03G0199	Gh_D10G2586	0.9147	13.4164	positive
Gh_A11G0239	Gh_D10G2586	0.9229	5.47723	positive
Gh_D10G1101	Gh_D10G2586	0.8011	31.3688	positive
Gh_A03G1278	Gh_D10G2586	0.7824	35.4119	positive
Gh_A05G1759	Gh_D10G2586	0.8641	27.3313	positive
Gh_D05G1719	Gh_D10G2586	0.8845	27.9643	positive
Gh_D04G0820	Gh_D10G2586	0.9013	21.0238	positive
Gh_A06G1309	Gh_D10G2586	0.8499	23.2379	positive
Gh_A13G0702	Gh_D10G2586	0.916	28.1425	positive
Gh_D08G1597	Gh_D10G2586	0.8676	24.6577	positive
Gh_A06G1017	Gh_D10G2586	0.9346	9.48683	positive
Gh_A13G1643	Gh_D10G2586	0.9266	5.2915	positive
Gh_A10G2239	Gh_D10G2586	0.9802	1	positive
Gh_D10G2586	Gh_D11G0999	0.88	19.6214	positive
Gh_A06G1899	Gh_A10G2239	0.9359	20.8327	positive
Gh_D05G0534	Gh_Sca005023G04	0.8373	5.2915	positive
Gh_A13G1684	Gh_D05G0534	0.7796	16.3095	positive
Gh_A04G0955	Gh_D12G1031	0.9159	24.0832	positive
Gh_A05G1300	Gh_A05G1808	0.8478	28.1425	positive
Gh_A07G0036	Gh_A10G2239	0.93	27.1662	positive
Gh_A05G1808	Gh_A07G0162	0.8588	9.48683	positive
Gh_A12G0941	Gh_D07G1002	0.8907	8.3666	positive
Gh_D05G2004	Gh_D12G2702	0.9005	11.1803	positive
Gh_A05G4009	Gh_D05G2004	0.9277	2	positive
Gh_D05G2004	Gh_D08G2570	0.9277	9.94987	positive
Gh_A05G0951	Gh_D05G2004	0.913	22.1359	positive
Gh_D05G2004	Gh_D08G0742	0.927	4.89898	positive
Gh_D05G2004	Gh_D08G1682	0.9427	6.245	positive
Gh_A11G2365	Gh_D05G2004	0.9358	3.74166	positive
Gh_A05G3101	Gh_D05G2004	0.8437	27.55	positive
Gh_D05G2004	Gh_D11G2321	0.8837	25.9037	positive
Gh_D05G0041	Gh_D05G2004	0.9274	22.5832	positive
Gh_A05G1565	Gh_D05G2004	0.9231	11.225	positive
Gh_D05G2004	Gh_D13G2031	0.9237	29.6648	positive
Gh_D05G2004	Gh_D12G0510	0.9034	26.8328	positive
Gh_D05G2004	Gh_D08G1728	0.9244	10.9087	positive
Gh_D01G1490	Gh_D05G2004	0.9081	16.3095	positive
Gh_A12G1056	Gh_D05G2004	0.8272	33.9411	positive
Gh_A10G2239	Gh_A11G1380	0.9446	10	positive
Gh_A05G2619	Gh_A10G2239	0.8908	21.6333	positive
Gh_A13G1684	Gh_D07G1810	0.7849	24.2899	positive
Gh_A05G1808	Gh_D02G2435	0.8528	22.6495	positive
Gh_A10G2239	Gh_D06G1768	0.9476	15.8745	positive
Gh_A10G2239	Gh_A11G3082	0.9078	24.98	positive
Gh_A05G1808	Gh_D01G0335	0.8445	26.7021	positive
Gh_A05G1808	Gh_A05G3776	0.8482	10.4881	positive
Gh_A09G0495	Gh_A10G2239	0.9483	15.748	positive
Gh_A04G1215	Gh_A10G2239	0.9202	29.3939	positive
Gh_A10G2239	Gh_D10G1101	0.823	17.8606	positive
Gh_A03G0631	Gh_A05G1808	0.8589	22.2486	positive
Gh_D10G0493	Gh_D10G1132	0.771	14.6969	positive
Gh_A02G1480	Gh_A05G1808	0.8689	8.12404	positive
Gh_A05G1808	Gh_A06G1377	0.8804	9.79796	positive
Gh_A05G1808	Gh_D06G1720	0.8727	18.0278	positive
Gh_A10G2239	Gh_D04G0820	0.9166	8.60233	positive
Gh_A11G1337	Gh_D10G0493	0.7411	22.9783	positive
Gh_A05G1808	Gh_A06G1836	0.853	27.1662	positive
Gh_A05G1808	Gh_A13G0597	0.7726	18.6011	positive
Gh_A05G1808	Gh_D05G3245	0.8149	21.2132	positive
Gh_A10G2239	Gh_A13G0702	0.9418	19.8997	positive
Gh_A05G1808	Gh_D07G0219	0.8447	9.48683	positive
Gh_A05G1808	Gh_A12G1292	0.8155	28.5307	positive
Gh_A05G1808	Gh_D12G1963	0.8482	29.5635	positive
Gh_A05G1808	Gh_A07G1126	0.8534	16.4924	positive
Gh_A05G1808	Gh_D11G1566	0.8562	25.9808	positive
Gh_A10G2239	Gh_D04G1950	0.9499	13.4907	positive
Gh_A07G1444	Gh_D10G0493	0.7138	26.2298	positive
Gh_D01G2203	Gh_D10G0493	0.7733	14.6969	positive
Gh_D01G1617	Gh_D10G0493	0.7503	21.0238	positive
Gh_D02G1888	Gh_D10G0493	0.7272	25.04	positive
Gh_A06G1017	Gh_A10G2239	0.9551	5.2915	positive
Gh_D02G0445	Gh_D10G0493	0.7773	18.8944	positive
Gh_A05G1808	Gh_D05G1682	0.8738	2	positive
Gh_D09G0503	Gh_D10G0377	0.9597	9.79796	positive
Gh_A06G1420	Gh_D10G0377	0.9828	3.4641	positive
Gh_A01G1833	Gh_D10G0377	0.9585	9	positive
Gh_D10G0377	Gh_D12G1438	0.9467	20.199	positive
Gh_A07G0811	Gh_D10G0377	0.9844	1.41421	positive
Gh_A07G0036	Gh_D10G0377	0.9584	8.3666	positive
Gh_D06G1768	Gh_D10G0377	0.9811	4.24264	positive
Gh_D10G0377	Gh_D11G0254	0.9586	10.9545	positive
Gh_A07G1418	Gh_D10G0377	0.9448	16.7332	positive
Gh_A09G0495	Gh_D10G0377	0.9706	6.7082	positive
Gh_A04G1215	Gh_D10G0377	0.946	15.7162	positive
Gh_A13G0702	Gh_D10G0377	0.9749	2.82843	positive
Gh_D04G1950	Gh_D10G0377	0.9596	10.583	positive
Gh_A06G1017	Gh_D10G0377	0.9414	28.3725	positive
Gh_A09G0257	Gh_D10G0377	0.9476	17.8885	positive
Gh_A06G1420	Gh_D09G0503	0.9893	2.44949	positive
Gh_A01G1833	Gh_D09G0503	0.9764	4.89898	positive
Gh_D09G0503	Gh_D12G1438	0.9665	6.9282	positive
Gh_D09G0503	Gh_D11G0249	0.9621	14.9666	positive
Gh_A07G0811	Gh_D09G0503	0.9707	7	positive
Gh_A06G1899	Gh_D09G0503	0.9677	6.63325	positive
Gh_A07G0036	Gh_D09G0503	0.9529	15.8745	positive
Gh_A11G1380	Gh_D09G0503	0.9319	29.3939	positive
Gh_D06G1768	Gh_D09G0503	0.9896	1.41421	positive
Gh_D09G0503	Gh_D11G0254	0.9811	5	positive
Gh_A07G1418	Gh_D09G0503	0.9394	28.1425	positive
Gh_A09G0495	Gh_D09G0503	0.9823	3.4641	positive
Gh_A04G1215	Gh_D09G0503	0.9682	3.16228	positive
Gh_A13G0702	Gh_D09G0503	0.9696	8.48528	positive
Gh_D04G1950	Gh_D09G0503	0.9889	1.73205	positive
Gh_A09G0257	Gh_D09G0503	0.9611	11.619	positive
Gh_A10G1510	Gh_D04G1736	0.9368	12.1244	positive
Gh_A10G1510	Gh_D01G1459	0.9401	3.87298	positive
Gh_A10G1510	Gh_D07G1002	0.908	7.54983	positive
Gh_A05G2114	Gh_A10G1510	0.9547	4.47214	positive
Gh_A10G1510	Gh_D08G1342	0.9174	10	positive
Gh_A01G1736	Gh_A10G1510	0.8888	23.2379	positive
Gh_A04G1123	Gh_A10G1510	0.9269	11.225	positive
Gh_A02G1604	Gh_D09G2000	0.9515	12.4097	positive
Gh_D09G2000	Gh_D11G0460	0.9408	18.3303	positive
Gh_D09G2000	Gh_D13G1322	0.9526	15.0997	positive
Gh_A04G0955	Gh_D09G2000	0.922	16.9411	positive
Gh_D06G1932	Gh_D09G2000	0.9657	4.47214	positive
Gh_A03G0083	Gh_D09G2000	0.9865	1.41421	positive
Gh_A11G0378	Gh_D09G2000	0.9503	14.4914	positive
Gh_A12G2708	Gh_D09G2000	0.9601	8.48528	positive
Gh_D03G1568	Gh_D09G2000	0.9801	2.44949	positive
Gh_D09G2000	Gh_D11G3268	0.9817	1.41421	positive
Gh_A11G0393	Gh_D09G2000	0.9292	25.04	positive
Gh_A02G1246	Gh_D09G2000	0.9533	17.8606	positive
Gh_D04G1498	Gh_D09G2000	0.9456	17	positive
Gh_D09G2000	Gh_D11G3137	0.939	25.4951	positive
Gh_A03G0960	Gh_D09G2000	0.9548	12.6491	positive
Gh_A05G0834	Gh_D09G2000	0.9401	29.5804	positive
Gh_D09G2000	Gh_D12G2750	0.9048	24.9199	positive
Gh_D03G0119	Gh_D09G2000	0.9266	29.7321	positive
Gh_A13G0806	Gh_D09G2000	0.9427	18.4932	positive
Gh_A02G1604	Gh_D02G1346	0.9538	7.48331	positive
Gh_A02G1604	Gh_A08G1149	0.9141	23.6643	positive
Gh_A02G1604	Gh_A03G0083	0.9429	17.9722	positive
Gh_A02G1604	Gh_A11G0378	0.9407	23.9792	positive
Gh_A02G1604	Gh_A12G2708	0.9542	10.6771	positive
Gh_A02G1604	Gh_D03G1568	0.9457	14.4914	positive
Gh_A02G1604	Gh_D11G3268	0.9426	14.4568	positive
Gh_A02G1604	Gh_D11G3137	0.9439	16.4924	positive
Gh_A07G1418	Gh_D11G0254	0.9452	21.3542	positive
Gh_A09G0495	Gh_D11G0254	0.9582	18.4391	positive
Gh_A04G1215	Gh_D11G0254	0.9579	12.3288	positive
Gh_A13G0702	Gh_D11G0254	0.9721	6.7082	positive
Gh_D04G1950	Gh_D11G0254	0.9873	1.41421	positive
Gh_A06G1017	Gh_D11G0254	0.9497	27.7128	positive
Gh_A09G0257	Gh_D11G0254	0.9696	4.47214	positive
Gh_D08G2570	Gh_D12G2702	0.9218	10.4881	positive
Gh_D08G1682	Gh_D12G2702	0.9034	24.4949	positive
Gh_D12G2702	Gh_D13G2031	0.9027	29.189	positive
Gh_A05G4009	Gh_D08G0742	0.9187	4.24264	positive
Gh_A05G4009	Gh_D11G2321	0.8763	17.4929	positive
Gh_A05G4009	Gh_D12G0510	0.9002	17.1464	positive
Gh_A05G4009	Gh_D01G1490	0.9222	3.74166	positive
Gh_A11G0378	Gh_D06G1932	0.9518	15.4919	positive
Gh_A12G2708	Gh_D06G1932	0.9801	1.41421	positive
Gh_D06G1932	Gh_D11G3268	0.9642	4	positive
Gh_A02G1246	Gh_D06G1932	0.9796	1.41421	positive
Gh_D04G1498	Gh_D06G1932	0.9428	22.4944	positive
Gh_A05G2114	Gh_D08G1342	0.9386	6.16441	positive
Gh_A05G2114	Gh_D02G0920	0.9401	15.4919	positive
Gh_A04G1123	Gh_A05G2114	0.9667	1.73205	positive
Gh_A03G0083	Gh_A11G0378	0.9446	16.4924	positive
Gh_A03G0083	Gh_D03G1568	0.9936	1	positive
Gh_A03G0083	Gh_D11G3268	0.9549	6.32456	positive
Gh_A03G0083	Gh_A11G0393	0.9483	9.89949	positive
Gh_A03G0083	Gh_D04G1498	0.9433	19.4422	positive
Gh_A03G0083	Gh_D11G3137	0.9419	20.9762	positive
Gh_A03G0083	Gh_A03G0960	0.9635	6.63325	positive
Gh_A03G0083	Gh_A05G0834	0.9561	9.16515	positive
Gh_A03G0083	Gh_D12G2750	0.9182	13.9642	positive
Gh_A03G0083	Gh_D03G0119	0.9438	13.6748	positive
Gh_A03G0083	Gh_A13G0806	0.9504	11.4018	positive
Gh_A01G1728	Gh_D05G1733	0.8083	27.4955	positive
Gh_A01G1728	Gh_A05G2619	0.809	24	positive
Gh_A01G1728	Gh_A11G0239	0.8527	7.87401	positive
Gh_A01G1728	Gh_D05G1719	0.8213	19.7484	positive
Gh_A01G1728	Gh_D11G0999	0.8072	18.1659	positive
Gh_A05G0951	Gh_A10G2237	0.9412	2	positive
Gh_A10G2237	Gh_D08G1728	0.9247	18.3303	positive
Gh_A13G0791	Gh_D04G1504	0.9236	7.4162	positive
Gh_A07G0816	Gh_D04G1504	0.8786	21.4942	positive
Gh_D02G2435	Gh_D04G1504	0.9072	3.4641	positive
Gh_D04G1504	Gh_D07G0750	0.8994	16.9706	positive
Gh_A03G0631	Gh_D04G1504	0.922	5.47723	positive
Gh_A02G1480	Gh_D04G1504	0.882	14.2478	positive
Gh_D04G1504	Gh_D11G1566	0.9093	3	positive
Gh_D05G3021	Gh_D07G0019	0.9329	2	positive
Gh_D04G0626	Gh_D05G3021	0.9444	1.41421	positive
Gh_A12G1937	Gh_D05G3021	0.9151	3.87298	positive
Gh_D06G2295	Gh_D10G2603	0.8249	19.8746	positive
Gh_A05G3776	Gh_D10G2603	0.8002	24.3311	positive
Gh_A06G1197	Gh_D06G2295	0.8958	6.48074	positive
Gh_A13G0791	Gh_D06G2295	0.927	4	positive
Gh_A07G0816	Gh_D06G2295	0.8858	12.8452	positive
Gh_A05G1300	Gh_D06G2295	0.8922	6	positive
Gh_A07G0162	Gh_D06G2295	0.8752	12.2474	positive
Gh_D06G2295	Gh_D07G0108	0.8675	9.64365	positive
Gh_A03G0631	Gh_D06G2295	0.8757	29.5635	positive
Gh_A06G1836	Gh_D06G2295	0.9807	1	positive
Gh_D06G2295	Gh_D12G1963	0.8793	14.8324	positive
Gh_A08G0801	Gh_A12G1397	0.849	21.9089	positive
Gh_A06G1309	Gh_A08G0801	0.815	26.1534	positive
Gh_A06G1197	Gh_A13G0791	0.8908	21.2132	positive
Gh_A05G1300	Gh_A06G1197	0.8833	9.53939	positive
Gh_A03G0631	Gh_A06G1197	0.8913	15.2971	positive
Gh_A06G1197	Gh_A06G1836	0.8681	20.7846	positive
Gh_A09G2137	Gh_A09G2440	0.7673	15.7162	positive
Gh_A09G2440	Gh_A11G3010	0.7869	14.8997	positive
Gh_A09G2440	Gh_A10G1339	0.8277	3.74166	positive
Gh_A09G2440	Gh_D01G1620	0.8161	5.83095	positive
Gh_A09G2440	Gh_D08G2109	0.8034	10.3923	positive
Gh_A01G1833	Gh_A06G1420	0.9795	3	positive
Gh_A06G1420	Gh_D12G1438	0.9624	10.9087	positive
Gh_A06G1420	Gh_D11G0249	0.972	9.16515	positive
Gh_A06G1420	Gh_D06G0045	0.9371	21	positive
Gh_A06G1420	Gh_A07G0811	0.9906	1.41421	positive
Gh_A06G1420	Gh_A06G1899	0.9482	24.7386	positive
Gh_A06G1420	Gh_A07G0036	0.9748	3.16228	positive
Gh_A06G1420	Gh_D06G1768	0.9931	1	positive
Gh_A06G1420	Gh_D11G0254	0.9839	3.87298	positive
Gh_A06G1420	Gh_A07G1418	0.9599	8.12404	positive
Gh_A06G1420	Gh_A09G0495	0.9808	5.65685	positive
Gh_A04G1215	Gh_A06G1420	0.9632	8.94427	positive
Gh_A06G1420	Gh_A13G0702	0.9818	2.64575	positive
Gh_A06G1420	Gh_D04G1950	0.9866	3.4641	positive
Gh_A06G1017	Gh_A06G1420	0.951	23.4734	positive
Gh_A06G1420	Gh_A09G0257	0.9723	3.31662	positive
Gh_A09G2137	Gh_A10G1339	0.7919	20.2485	positive
Gh_A09G2137	Gh_D01G1620	0.8525	1.73205	positive
Gh_A09G2137	Gh_D01G2203	0.7933	11.619	positive
Gh_A09G2137	Gh_D02G1888	0.8522	1.41421	positive
Gh_D12G0691	Gh_D13G2038	0.8093	28	positive
Gh_A11G1380	Gh_D13G2038	0.8763	10	positive
Gh_A05G2619	Gh_D13G2038	0.8507	12.4097	positive
Gh_A08G1305	Gh_D13G2038	0.853	8.94427	positive
Gh_D08G1597	Gh_D13G2038	0.8288	24.0832	positive
Gh_D08G1682	Gh_D09G2139	0.8907	22.891	positive
Gh_A01G1681	Gh_D05G2641	0.7232	19.8997	positive
Gh_D04G0626	Gh_D07G0019	0.9655	1	positive
Gh_A11G2826	Gh_D07G0019	0.8957	9.59166	positive
Gh_A12G1937	Gh_D07G0019	0.8972	7.74597	positive
Gh_A07G1947	Gh_D08G0161	0.7481	17.2337	positive
Gh_A07G0816	Gh_D08G0161	0.7913	11	positive
Gh_A02G1480	Gh_D08G0161	0.7641	27.4226	positive
Gh_A08G1149	Gh_D02G1346	0.9399	8.7178	positive
Gh_D02G1346	Gh_D11G3137	0.9336	29.7321	positive
Gh_A01G1833	Gh_D12G1438	0.9412	28.7228	positive
Gh_A01G1833	Gh_D11G0249	0.9446	28.9828	positive
Gh_A01G1833	Gh_A07G0811	0.9633	8.48528	positive
Gh_A01G1833	Gh_A07G0036	0.9404	26.9815	positive
Gh_A01G1833	Gh_D06G1768	0.9784	4.58258	positive
Gh_A01G1833	Gh_D11G0254	0.9671	7.74597	positive
Gh_A01G1833	Gh_A09G0495	0.9545	16.2481	positive
Gh_A01G1833	Gh_A04G1215	0.9469	14.6969	positive
Gh_A01G1833	Gh_A13G0702	0.9629	10.198	positive
Gh_A01G1833	Gh_D04G1950	0.9795	3.16228	positive
Gh_A01G1833	Gh_A09G0257	0.9563	10.9545	positive
Gh_A11G0236	Gh_D04G1736	0.9623	2.23607	positive
Gh_A05G2114	Gh_A11G0236	0.9325	16.1245	positive
Gh_A11G0236	Gh_D02G0920	0.9597	3.4641	positive
Gh_A04G1123	Gh_A11G0236	0.9363	6.32456	positive
Gh_A10G1339	Gh_A11G3010	0.8815	1.41421	positive
Gh_A11G3010	Gh_D01G1620	0.812	16.2481	positive
Gh_A11G3010	Gh_D08G2109	0.8191	12.3693	positive
Gh_A11G3010	Gh_D10G1132	0.8249	4.47214	positive
Gh_A07G1444	Gh_A11G3010	0.7469	18.412	positive
Gh_D07G1002	Gh_D10G1286	0.8716	16.4317	positive
Gh_A05G2114	Gh_D10G1286	0.8891	20.4939	positive
Gh_D05G2641	Gh_D10G1286	0.8514	5.83095	positive
Gh_A04G1123	Gh_D10G1286	0.899	9.94987	positive
Gh_A05G0291	Gh_A08G1950	0.8551	6.08276	positive
Gh_A08G1387	Gh_D04G0742	0.8383	20.4939	positive
Gh_A05G4009	Gh_A08G1387	0.9094	6.32456	positive
Gh_A08G1387	Gh_D08G0742	0.9313	3.4641	positive
Gh_A08G1387	Gh_D08G1682	0.9599	3	positive
Gh_A08G1387	Gh_D08G1728	0.9559	2.82843	positive
Gh_A08G1387	Gh_D01G1490	0.9228	6	positive
Gh_A11G2365	Gh_A11G3221	0.9219	8	positive
Gh_A11G3221	Gh_D11G2321	0.9498	1	positive
Gh_D05G1733	Gh_D07G2351	0.869	10.7703	positive
Gh_D05G2165	Gh_D07G2351	0.86	11.619	positive
Gh_D05G2843	Gh_D07G2351	0.845	23.5584	positive
Gh_A05G2619	Gh_D07G2351	0.8552	14.8324	positive
Gh_A11G0239	Gh_D07G2351	0.8962	3.16228	positive
Gh_A05G1759	Gh_D07G2351	0.8318	28.2843	positive
Gh_D05G1719	Gh_D07G2351	0.8959	5.2915	positive
Gh_D01G1459	Gh_D04G1736	0.9269	17.2337	positive
Gh_A05G2114	Gh_D04G1736	0.9672	2	positive
Gh_D04G1736	Gh_D08G1342	0.9092	28.4956	positive
Gh_D02G0920	Gh_D04G1736	0.9721	1	positive
Gh_A04G1123	Gh_D04G1736	0.9559	5.65685	positive
Gh_A13G0791	Gh_Sca005341G01	0.9164	9.21954	positive
Gh_A07G0816	Gh_A13G0791	0.935	3.16228	positive
Gh_A07G0162	Gh_A13G0791	0.8809	15.0997	positive
Gh_A13G0791	Gh_D07G0750	0.9073	15.906	positive
Gh_A13G0791	Gh_D07G0108	0.891	9.38083	positive
Gh_A03G0631	Gh_A13G0791	0.9147	11.5326	positive
Gh_A02G1480	Gh_A13G0791	0.8896	13.8564	positive
Gh_A06G1377	Gh_A13G0791	0.924	11.8322	positive
Gh_A13G0791	Gh_D06G1720	0.9429	2.82843	positive
Gh_A06G1836	Gh_A13G0791	0.8985	15.1987	positive
Gh_A13G0791	Gh_D12G1963	0.9298	4.58258	positive
Gh_A07G1126	Gh_A13G0791	0.9123	4.47214	positive
Gh_A13G0791	Gh_D11G1566	0.8944	10.5357	positive
Gh_D05G1733	Gh_D12G0691	0.8657	9.64365	positive
Gh_D05G1733	Gh_D05G2165	0.8948	10.198	positive
Gh_D05G1733	Gh_D05G2843	0.9457	2.82843	positive
Gh_A05G2619	Gh_D05G1733	0.9153	4.58258	positive
Gh_A08G1305	Gh_D05G1733	0.8691	16.7332	positive
Gh_A11G0239	Gh_D05G1733	0.9309	4.24264	positive
Gh_D05G1719	Gh_D05G1733	0.9416	3.16228	positive
Gh_A06G1309	Gh_D05G1733	0.8569	8.48528	positive
Gh_D05G1733	Gh_D11G0999	0.8996	5.47723	positive
Gh_D05G2165	Gh_D12G0691	0.8581	10.0995	positive
Gh_D05G2843	Gh_D12G0691	0.8572	13.4907	positive
Gh_A05G2619	Gh_D12G0691	0.8641	8.66025	positive
Gh_A08G1305	Gh_D12G0691	0.8777	2.82843	positive
Gh_A11G0239	Gh_D12G0691	0.8645	9.79796	positive
Gh_D05G1719	Gh_D12G0691	0.8247	27.6948	positive
Gh_A06G1309	Gh_D12G0691	0.7897	25.2587	positive
Gh_D11G0999	Gh_D12G0691	0.847	12.3693	positive
Gh_D05G2165	Gh_D05G2843	0.9106	6	positive
Gh_A05G2619	Gh_D05G2165	0.8658	14	positive
Gh_D05G1954	Gh_D05G2165	0.8901	10	positive
Gh_A08G1305	Gh_D05G2165	0.8405	21.4942	positive
Gh_A11G0239	Gh_D05G2165	0.9009	6.7082	positive
Gh_A05G1759	Gh_D05G2165	0.8337	29.7993	positive
Gh_D05G1719	Gh_D05G2165	0.9207	4.58258	positive
Gh_A06G1309	Gh_D05G2165	0.7994	26.7208	positive
Gh_D05G2165	Gh_D11G0999	0.8931	6	positive
Gh_A05G1565	Gh_A11G1278	0.8931	24.4949	positive
Gh_A11G1278	Gh_D07G0219	0.8609	3.60555	positive
Gh_A11G1278	Gh_A12G1056	0.812	29.7993	positive
Gh_D11G0460	Gh_D13G1322	0.9616	5.19615	positive
Gh_D06G1932	Gh_D11G0460	0.9364	22.9129	positive
Gh_A03G0083	Gh_D11G0460	0.9363	19.1833	positive
Gh_D03G1568	Gh_D11G0460	0.9287	28.5307	positive
Gh_A11G0393	Gh_D11G0460	0.9268	21.9089	positive
Gh_A02G1246	Gh_D11G0460	0.957	9.59166	positive
Gh_D04G1498	Gh_D11G0460	0.9468	10.9545	positive
Gh_A03G0960	Gh_D11G0460	0.9487	12.7279	positive
Gh_A05G0834	Gh_D11G0460	0.944	16.2481	positive
Gh_D11G0460	Gh_D12G2750	0.9143	17.9444	positive
Gh_A13G0806	Gh_D11G0460	0.9432	14.2829	positive
Gh_A12G1937	Gh_D11G0460	0.9046	26.3249	positive
Gh_D08G1360	Gh_D11G0249	0.9161	15.4919	positive
Gh_D08G1360	Gh_D11G0254	0.9017	28.2489	positive
Gh_A03G0631	Gh_D07G0750	0.9556	1	positive
Gh_D07G0750	Gh_D11G1566	0.8723	28.6356	positive
Gh_A07G1418	Gh_D11G1400	0.942	18.4932	positive
Gh_A03G0199	Gh_A07G1418	0.9192	20.567	positive
Gh_A07G1418	Gh_A09G0495	0.9477	16.4924	positive
Gh_A07G1418	Gh_D04G1950	0.9417	24.6577	positive
Gh_A06G1017	Gh_A07G1418	0.9618	3.4641	positive
Gh_A07G1418	Gh_A09G0257	0.9372	29.1548	positive
Gh_A05G1516	Gh_D08G1342	0.8876	24.4949	positive
Gh_D02G0920	Gh_D08G1342	0.9299	10.583	positive
Gh_A03G0451	Gh_D08G1342	0.8838	15.6525	positive
Gh_A08G1950	Gh_D09G2081	0.8907	23.2379	positive
Gh_A06G1377	Gh_D07G0108	0.866	12.8062	positive
Gh_D06G1720	Gh_D07G0108	0.8555	22.5832	positive
Gh_A07G1126	Gh_D07G0108	0.8606	6.7082	positive
Gh_A11G0378	Gh_A12G2708	0.9565	12.7279	positive
Gh_A11G0378	Gh_D03G1568	0.9387	25.6905	positive
Gh_A02G1246	Gh_A11G0378	0.9654	6.7082	positive
Gh_A11G0378	Gh_D04G1498	0.9654	3.4641	positive
Gh_A11G0378	Gh_D11G3137	0.9568	8.48528	positive
Gh_A03G0960	Gh_A11G0378	0.9644	7.74597	positive
Gh_A11G0378	Gh_D03G0119	0.9665	2	positive
Gh_A03G0199	Gh_D11G1400	0.9253	17.7482	positive
Gh_A06G1017	Gh_D11G1400	0.9593	7.93725	positive
Gh_A06G1377	Gh_D03G0466	0.8264	18.868	positive
Gh_A13G0597	Gh_D03G0466	0.7274	25.8844	positive
Gh_D08G1682	Gh_D08G2570	0.9488	6.9282	positive
Gh_D05G0041	Gh_D08G2570	0.9416	20.7846	positive
Gh_D01G1490	Gh_D08G2570	0.916	24.8193	positive
Gh_A05G0951	Gh_D08G1682	0.9297	18.5472	positive
Gh_A05G0951	Gh_A11G2365	0.9186	22.1811	positive
Gh_A05G1759	Gh_D05G1954	0.9444	1	positive
Gh_D05G1719	Gh_D05G1954	0.8702	24.98	positive
Gh_A06G1017	Gh_D05G1954	0.9011	28.1425	positive
Gh_A12G2708	Gh_D11G3268	0.9606	5.74456	positive
Gh_A02G1246	Gh_A12G2708	0.9707	6.32456	positive
Gh_A12G2708	Gh_D04G1498	0.9443	22.2261	positive
Gh_A12G2708	Gh_D11G3137	0.9523	16.9115	positive
Gh_D01G1620	Gh_D08G2109	0.828	12.9615	positive
Gh_D01G1620	Gh_D02G1888	0.789	12.9615	positive
Gh_D08G0742	Gh_D08G1682	0.9394	9.69536	positive
Gh_D01G1490	Gh_D08G0742	0.9426	1	positive
Gh_D03G1568	Gh_D11G3268	0.9555	6.32456	positive
Gh_A11G0393	Gh_D03G1568	0.9432	13.0767	positive
Gh_D03G1568	Gh_D04G1498	0.9423	21.9089	positive
Gh_D03G1568	Gh_D11G3137	0.9451	15.4919	positive
Gh_A03G0960	Gh_D03G1568	0.9483	19.799	positive
Gh_D03G1568	Gh_D12G2750	0.9252	6.40312	positive
Gh_D03G0119	Gh_D03G1568	0.932	24.4949	positive
Gh_D01G2203	Gh_D08G2109	0.7979	21.8174	positive
Gh_A02G1246	Gh_D11G3268	0.9386	28.9828	positive
Gh_A03G0199	Gh_A08G1305	0.886	18.8149	positive
Gh_A08G1305	Gh_A11G0239	0.8801	9.89949	positive
Gh_A08G1305	Gh_D08G1597	0.959	1	positive
Gh_A08G1305	Gh_D11G0999	0.8601	11.4018	positive
Gh_D08G1682	Gh_D13G2031	0.9494	12.6491	positive

## Sheet: annotation
ID	Orthologous genes in arabidopsis thaliana	E-value	score	annotation (nr)
Gh_A09G0257	AT5G40310.2	1.52464e-167	1210	PREDICTED: RNA exonuclease 4-like [Gossypium hirsutum]
Gh_A10G2239	AT3G14067.1	0	2687	PREDICTED: subtilisin-like protease SBT1.4 [Gossypium arboreum]
Gh_A01G1029	AT5G49630.1	0	2021	PREDICTED: amino acid permease 6-like [Gossypium hirsutum]
Gh_A10G1510	Na	Na	Na	PREDICTED: major pollen allergen Bet v 1-E-like [Gossypium arboreum]
Gh_D09G2000	AT1G06000.1	2.3699e-136	1023	PREDICTED: UDP-glycosyltransferase 89C1-like [Gossypium raimondii]
Gh_A02G1604	AT1G27660.1	1.84544e-35	339	PREDICTED: transcription factor bHLH110-like [Gossypium hirsutum]
Gh_D06G1932	AT5G36110.1	1.23414e-101	802	PREDICTED: taxadiene 5-alpha hydroxylase-like [Gossypium hirsutum]
Gh_A05G2114	AT5G09360.1	1.2021e-70	582	PREDICTED: laccase-14-like [Gossypium hirsutum]
Gh_A03G0083	AT5G47450.1	3.92454e-144	1037	PREDICTED: probable aquaporin TIP-type [Gossypium hirsutum]
Gh_A10G0470	AT3G14240.1	0	3124	PREDICTED: subtilisin-like protease SBT1.5 [Gossypium hirsutum]
Gh_A10G0093	AT4G22290.1	0	1409	PREDICTED: uncharacterized membrane protein At1g16860-like isoform X1 [Gossypium hirsutum]
Gh_A01G1728	AT5G06300.1	1.23995e-140	1006	PREDICTED: cytokinin riboside 5'-monophosphate phosphoribohydrolase LOG7 [Gossypium hirsutum]
Gh_A10G2237	AT1G72510.2	9.492e-54	426	PREDICTED: uncharacterized protein LOC108472777 [Gossypium arboreum]
Gh_A05G1808	AT5G67360.1	0	2610	hypothetical protein GOBAR_AA16703 [Gossypium barbadense]
Gh_D05G3021	AT3G26610.1	0	1516	hypothetical protein B456_009G336100 [Gossypium raimondii]
Gh_A08G0801	AT1G15690.1	0	3536	PREDICTED: pyrophosphate-energized vacuolar membrane proton pump-like [Gossypium arboreum]
Gh_A09G2440	AT3G54030.1	0	2194	PREDICTED: probable serine/threonine-protein kinase At5g41260 [Gossypium hirsutum]
Gh_A06G1420	AT2G40320.1	6.45653e-146	1078	PREDICTED: protein trichome birefringence-like 33 isoform X1 [Gossypium hirsutum]
Gh_A09G2137	AT3G17350.1	5.54824e-108	809	PREDICTED: wall-associated receptor kinase-like 15 isoform X1 [Gossypium hirsutum]
Gh_D10G2586	AT3G14067.1	0	2727	PREDICTED: subtilisin-like protease SBT1.4 [Gossypium hirsutum]
Gh_D05G2004	AT5G67360.1	0	2607	PREDICTED: subtilisin-like protease SBT1.7 [Gossypium hirsutum]
Gh_A01G1681	AT2G40890.1	0	2226	PREDICTED: cytochrome P450 98A2-like, partial [Gossypium arboreum]
Gh_D07G0019	AT4G30170.1	1.24114e-157	1142	PREDICTED: peroxidase 45-like [Gossypium hirsutum]
Gh_D02G1346	AT1G05260.1	1.65563e-160	1160	hypothetical protein GOBAR_DD11838 [Gossypium barbadense]
Gh_A08G1149	AT4G00230.1	0	2411	Xylem serinease 1 -like protein [Gossypium arboreum]
Gh_A01G1833	AT1G18590.1	1.19595e-85	660	hypothetical protein GOBAR_AA03282 [Gossypium barbadense]
Gh_A11G0236	AT4G12520.1	5.5818e-50	394	PREDICTED: 14 kDa proline-rich protein DC2.15-like [Gossypium hirsutum]
Gh_A11G3010	AT5G62710.1	0	2384	PREDICTED: LRR receptor-like serine/threonine-protein kinase FEI 2 [Gossypium arboreum]
Gh_A12G0941	AT1G01900.1	0	1926	PREDICTED: LOW QUALITY PROTEIN: subtilisin-like protease SBT1.1 [Gossypium hirsutum]
Gh_A05G0291	AT3G13540.1	6.40749e-54	437	PREDICTED: transcription factor MYB114-like [Gossypium hirsutum]
Gh_A08G1387	AT1G32170.1	9.0189e-164	1186	PREDICTED: probable xyloglucan endotransglucosylase/hydrolase protein 30 [Gossypium hirsutum]
Gh_A11G3221	AT5G17640.1	0	1626	PREDICTED: uncharacterized protein LOC107946690 [Gossypium hirsutum]
Gh_D07G2351	AT3G26760.1	3.15114e-135	989	PREDICTED: short-chain dehydrogenase reductase 2a-like [Gossypium raimondii]
Gh_D05G1733	AT1G76160.1	0	2400	PREDICTED: L-ascorbate oxidase homolog [Gossypium hirsutum]
Gh_A10G0449	AT5G59970.2	2.99095e-68	507	putative histone H14 [Helianthus annuus]
Gh_A10G0105	AT4G22130.1	0	2613	PREDICTED: protein STRUBBELIG-RECEPTOR FAMILY 8-like isoform X1 [Gossypium hirsutum]
Gh_D05G2165	AT1G22330.1	1.69944e-67	539	hypothetical protein B456_009G236000 [Gossypium raimondii]
Gh_A11G1278	AT5G48800.1	0	2500	PREDICTED: BTB/POZ domain-containing protein At5g48800-like [Gossypium hirsutum]
Gh_D11G0460	AT2G17820.1	0	4196	PREDICTED: histidine kinase 1-like [Gossypium hirsutum]
Gh_D04G0742	AT3G01900.1	0	1513	PREDICTED: cytochrome P450 94B3-like [Gossypium hirsutum]
Gh_D08G1360	AT4G01650.2	4.58073e-81	614	PREDICTED: uncharacterized protein LOC107918271 [Gossypium hirsutum]
Gh_A13G1684	AT2G05920.1	0	2921	PREDICTED: subtilisin-like protease SBT1.8 [Gossypium arboreum]
Gh_A10G2277	AT1G54610.3	0	1973	PREDICTED: probable serine/threonine-protein kinase At1g54610 [Gossypium hirsutum]
Gh_A05G1445	AT4G21890.1	3.06525e-120	918	PREDICTED: zinc finger MYND domain-containing protein 15-like [Gossypium hirsutum]
Gh_D08G2213	AT5G27670.1	3.35062e-80	595	PREDICTED: probable histone H2A.5 [Gossypium arboreum]
Gh_A07G1418	AT1G04040.1	7.12133e-112	827	PREDICTED: acid phosphatase 1-like [Gossypium hirsutum]
Gh_A11G0378	AT1G68400.1	1.75395e-107	867	PREDICTED: probable leucine-rich repeat receptor-like protein kinase At1g68400 [Gossypium hirsutum]
Gh_A12G2708	AT2G44480.1	0	1398	unnamed protein product, partial [Vitis vinifera]
Gh_D03G1568	AT5G47450.1	7.54331e-147	1054	PREDICTED: probable aquaporin TIP-type [Gossypium hirsutum]
Gh_D11G3268	AT2G36830.1	1.35227e-153	1099	PREDICTED: aquaporin TIP1-1-like [Gossypium raimondii]
Gh_A11G0393	AT4G38660.1	8.25938e-122	906	PREDICTED: thaumatin-like protein 1b isoform X1 [Gossypium arboreum]
Gh_A02G1246	AT5G07010.1	1.35004e-96	743	PREDICTED: cytosolic sulfotransferase 16-like [Gossypium arboreum]
Gh_D04G1498	AT1G76800.1	4.97574e-37	315	PREDICTED: vacuolar iron transporter homolog 2.1-like [Gossypium hirsutum]
Gh_D11G3137	AT3G20898.1	1.86152e-10	127	hypothetical protein B456_007G359500 [Gossypium raimondii]
Gh_A03G0960	AT1G05260.1	6.75114e-155	1157	unnamed protein product, partial [Vitis vinifera]
Gh_A05G0834	AT4G01470.1	5.11299e-144	1036	PREDICTED: probable aquaporin TIP1-2 [Gossypium raimondii]
Gh_D12G1031	AT1G01900.1	0	2117	PREDICTED: subtilisin-like protease SBT1.1 [Gossypium hirsutum]
Gh_D04G0626	AT5G05960.1	7.42955e-51	396	PREDICTED: uncharacterized protein LOC107955143 [Gossypium hirsutum]
Gh_A11G2826	AT2G35910.1	2.41625e-38	328	hypothetical protein GOBAR_AA16112 [Gossypium barbadense]
Gh_D03G0119	AT1G27660.1	1.30886e-34	332	PREDICTED: transcription factor bHLH110-like [Gossypium hirsutum]
Gh_A13G0806	AT5G19790.1	1.05011e-43	376	PREDICTED: ethylene-responsive transcription factor RAP2-11-like [Gossypium arboreum]
Gh_A12G1937	AT5G04770.1	0	1460	PREDICTED: cationic amino acid transporter 6, chloroplastic-like [Gossypium arboreum]
Gh_D01G1620	AT4G38660.1	7.69746e-160	1161	PREDICTED: thaumatin-like protein 1b [Gossypium raimondii]
Gh_D08G2109	AT5G60690.1	0	3634	PREDICTED: homeobox-leucine zipper protein REVOLUTA-like [Gossypium raimondii]
Gh_A09G2484	AT5G22870.1	1.81801e-62	490	PREDICTED: uncharacterized protein At1g08160-like [Gossypium hirsutum]
Gh_A08G1305	AT5G05170.1	0	4997	PREDICTED: cellulose synthase A catalytic subunit 3 [UDP-forming]
Gh_A08G1950	AT5G17820.1	6.51616e-133	976	PREDICTED: peroxidase 57 [Gossypium hirsutum]
Gh_A05G1516	AT5G47770.1	0	1517	PREDICTED: farnesyl pyrophosphate synthase 1 [Gossypium hirsutum]
Gh_A06G0198	AT4G37320.1	1.66898e-129	984	hypothetical protein GOBAR_AA22798 [Gossypium barbadense]
Gh_A01G1736	AT1G52340.1	3.31784e-75	589	PREDICTED: momilactone A synthase-like [Gossypium arboreum]
Gh_A03G0451	AT5G50400.1	0	2366	PREDICTED: probable inactive purple acid phosphatase 27 [Gossypium hirsutum]
Gh_A04G1123	AT4G20820.1	0	1337	PREDICTED: cannabidiolic acid synthase-like 1 [Gossypium hirsutum]
Gh_A03G0199	AT5G05340.1	2.09469e-162	1172	PREDICTED: peroxidase 4-like [Gossypium hirsutum]
Gh_D05G0899	AT5G59010.1	0	2266	PREDICTED: probable serine/threonine-protein kinase At5g41260 [Gossypium hirsutum]
Gh_A11G1395	AT3G07800.1	5.58153e-110	810	PREDICTED: thymidine kinase a-like [Gossypium hirsutum]
Gh_A11G0004	AT5G50150.1	0	1423	PREDICTED: uncharacterized protein LOC107922914 [Gossypium hirsutum]
Gh_A10G1339	AT5G01890.1	0	3196	PREDICTED: leucine-rich repeat receptor-like protein kinase PXC2 [Gossypium arboreum]
Gh_A07G0811	Na	Na	Na	hypothetical protein B456_001G100400 [Gossypium raimondii]
Gh_D05G2843	AT3G54770.1	1.33724e-72	566	hypothetical protein GOBAR_DD32324 [Gossypium barbadense]
Gh_A01G0158	AT5G21090.1	3.20231e-96	715	PREDICTED: somatic embryogenesis receptor kinase 2-like isoform X1 [Gossypium hirsutum]
Gh_A11G1380	AT4G12730.1	4.72094e-161	1178	PREDICTED: fasciclin-like arabinogalactan protein 2 [Gossypium hirsutum]
Gh_A05G2619	AT3G11320.1	0	1462	PREDICTED: probable sugar phosphate/phosphate translocator At3g11320 [Gossypium hirsutum]
Gh_A12G1397	AT2G01610.1	2.83883e-69	538	hypothetical protein GOBAR_AA04242 [Gossypium barbadense]
Gh_D05G1954	AT1G45688.1	9.90327e-156	1130	PREDICTED: uncharacterized protein LOC107905582 [Gossypium hirsutum]
Gh_A10G0538	AT1G17710.1	2.5341e-110	823	PREDICTED: inorganic pyrophosphatase 2-like [Gossypium arboreum]
Gh_A11G0239	AT4G12520.1	7.71896e-49	386	PREDICTED: 14 kDa proline-rich protein DC2.15-like [Gossypium hirsutum]
Gh_D10G1101	AT2G42570.1	5.37162e-178	1284	PREDICTED: protein trichome birefringence-like 39 [Gossypium arboreum]
Gh_A03G1278	AT1G10380.1	1.39887e-100	759	PREDICTED: wall-associated receptor kinase-like 10 [Gossypium raimondii]
Gh_A05G1759	AT1G45688.1	7.37028e-156	1131	PREDICTED: uncharacterized protein LOC107958135 [Gossypium hirsutum]
Gh_D05G1719	AT1G76240.1	2.80354e-74	584	hypothetical protein B456_009G188400 [Gossypium raimondii]
Gh_D04G0820	AT5G57770.1	5.25392e-138	1027	PREDICTED: VAN3-binding protein-like [Gossypium hirsutum]
Gh_A06G1309	AT4G22010.1	0	2310	PREDICTED: L-ascorbate oxidase homolog [Gossypium hirsutum]
Gh_A13G0702	AT2G03360.2	1.88516e-138	1043	PREDICTED: uncharacterized protein LOC107893863 [Gossypium hirsutum]
Gh_D08G1597	AT5G05170.1	0	4975	PREDICTED: cellulose synthase A catalytic subunit 3 [UDP-forming]
Gh_A06G1017	AT5G64740.1	0	4578	PREDICTED: cellulose synthase A catalytic subunit 5 [UDP-forming]
Gh_A13G1643	AT4G32870.1	5.93049e-53	417	PREDICTED: lachrymatory-factor synthase-like [Gossypium hirsutum]
Gh_A06G1899	Na	Na	Na	hypothetical protein GOBAR_AA07181 [Gossypium barbadense]
Gh_D05G0534	AT2G24260.1	6.73313e-92	722	PREDICTED: transcription factor bHLH66-like [Gossypium hirsutum]
Gh_A04G0955	AT1G21140.1	6.11761e-37	314	hypothetical protein GOBAR_AA17828 [Gossypium barbadense]
Gh_A05G1300	AT2G42610.2	1.86818e-83	623	PREDICTED: protein LIGHT-DEPENDENT SHORT HYPOCOTYLS 10-like [Gossypium arboreum]
Gh_A07G0036	AT2G20080.1	1.06705e-31	281	PREDICTED: protein SPEAR3-like [Gossypium hirsutum]
Gh_A05G4009	AT4G30190.1	0	4286	PREDICTED: plasma membrane ATPase 4 [Gossypium hirsutum]
Gh_A05G0951	AT3G51680.1	2.65472e-108	810	PREDICTED: short-chain dehydrogenase reductase 2a-like [Gossypium hirsutum]
Gh_A11G2365	AT1G54710.1	0	2629	PREDICTED: autophagy-related protein 18h-like isoform X1 [Gossypium hirsutum]
Gh_A05G3101	AT5G40470.1	1.15215e-110	863	PREDICTED: F-box/LRR-repeat protein 4-like [Gossypium hirsutum]
Gh_D05G0041	AT4G30190.1	0	4282	PREDICTED: LOW QUALITY PROTEIN: plasma membrane ATPase 4-like [Gossypium raimondii]
Gh_A05G1565	AT5G42210.2	1.71832e-180	1314	hypothetical protein GOBAR_AA37472 [Gossypium barbadense]
Gh_D01G1490	AT1G27980.1	0	2130	PREDICTED: sphingosine-1-phosphate lyase-like [Gossypium hirsutum]
Gh_A12G1056	AT4G01410.1	1.95794e-70	546	PREDICTED: protein YLS9-like [Gossypium hirsutum]
Gh_A09G0495	AT3G18180.1	3.60065e-156	1160	PREDICTED: protein O-linked-mannose beta-1,4-N-acetylglucosaminyltransferase 2-like [Gossypium hirsutum]
Gh_A04G1215	AT4G10310.1	1.45609e-102	799	PREDICTED: probable cation transporter HKT6 [Gossypium arboreum]
Gh_A03G0631	AT5G15630.1	0	1860	hypothetical protein CUMW_210680 [Citrus unshiu]
Gh_D10G0493	AT3G14240.1	0	3134	PREDICTED: subtilisin-like protease SBT1.6 [Gossypium raimondii]
Gh_A02G1480	AT5G24010.1	0	1436	PREDICTED: probable receptor-like protein kinase At2g23200 [Gossypium hirsutum]
Gh_A11G1337	AT3G25500.1	0	1889	PREDICTED: formin-like protein 1 [Gossypium hirsutum]
Gh_A07G1444	AT2G20300.1	0	2539	PREDICTED: receptor-like serine/threonine-protein kinase ALE2 isoform X1 [Gossypium arboreum]
Gh_D01G2203	AT5G01170.1	8.55737e-75	626	PREDICTED: UPF0503 protein At3g09070, chloroplastic-like [Gossypium hirsutum]
Gh_D01G1617	AT2G21050.1	0	2178	hypothetical protein GOBAR_DD13761 [Gossypium barbadense]
Gh_D02G1888	AT4G03230.4	0	3344	PREDICTED: G-type lectin S-receptor-like serine/threonine-protein kinase At4g03230 isoform X1 [Gossypium raimondii]
Gh_D02G0445	AT5G43310.4	0	2049	PREDICTED: uncharacterized protein LOC107936250 [Gossypium hirsutum]
Gh_D09G0503	AT3G18170.2	1.10685e-177	1313	PREDICTED: uncharacterized protein LOC107891975 [Gossypium hirsutum]
Gh_D10G0377	Na	Na	Na	hypothetical protein B456_011G042500 [Gossypium raimondii]
Gh_D06G1768	AT2G40320.1	0	1567	PREDICTED: protein trichome birefringence-like 33 isoform X1 [Gossypium hirsutum]
Gh_D04G1950	AT5G07010.1	5.79073e-155	1129	PREDICTED: cytosolic sulfotransferase 15-like [Gossypium hirsutum]
Gh_D08G2570	AT5G20885.1	3.33109e-55	436	hypothetical protein B456_004G285700 [Gossypium raimondii]
Gh_D08G1682	AT1G32170.1	2.63081e-166	1203	PREDICTED: probable xyloglucan endotransglucosylase/hydrolase protein 30 [Gossypium hirsutum]
Gh_D12G2702	AT2G46690.1	7.29944e-43	345	PREDICTED: auxin-responsive protein SAUR32-like [Gossypium hirsutum]
Gh_A13G0791	AT3G25560.1	0	2535	PREDICTED: protein NSP-INTERACTING KINASE 2-like [Gossypium hirsutum]
Gh_A07G0816	AT3G25500.1	0	1792	PREDICTED: formin-like protein 1 [Gossypium hirsutum]
Gh_D02G2435	AT1G10200.1	3.79847e-109	795	PREDICTED: LIM domain-containing protein WLIM1-like [Gossypium hirsutum]
Gh_D04G1504	AT5G64080.1	1.01272e-54	435	PREDICTED: non-specific lipid-transfer protein-like protein At5g64080 [Gossypium raimondii]
Gh_D06G2295	AT1G75500.2	3.42472e-112	834	PREDICTED: protein WALLS ARE THIN 1-like [Gossypium raimondii]
Gh_A05G3776	AT2G40480.1	3.67785e-134	1030	hypothetical protein GOBAR_AA14674 [Gossypium barbadense]
Gh_A06G1197	AT4G18260.1	3.68792e-96	726	PREDICTED: cytochrome b561 domain-containing protein At4g18260-like isoform X1 [Gossypium hirsutum]
Gh_A07G0162	AT2G25790.1	0	2503	PREDICTED: probably inactive leucine-rich repeat receptor-like protein kinase At2g25790 [Gossypium arboreum]
Gh_A06G1836	AT1G75500.2	0	1590	PREDICTED: protein WALLS ARE THIN 1-like [Gossypium arboreum]
Gh_D12G0691	AT4G37450.1	6.58456e-14	166	PREDICTED: lysine-rich arabinogalactan protein 18-like [Gossypium raimondii]
Gh_A07G1947	AT2G31160.1	1.98842e-84	634	PREDICTED: protein LIGHT-DEPENDENT SHORT HYPOCOTYLS 3-like [Gossypium hirsutum]
Gh_D07G1002	AT3G11340.1	3.36301e-137	1031	PREDICTED: UDP-glucose iridoid glucosyltransferase-like [Gossypium hirsutum]
Gh_D05G2641	AT3G10870.1	8.78497e-121	891	PREDICTED: methylesterase 17-like isoform X1 [Gossypium hirsutum]
Gh_D01G1459	AT1G70840.1	1.71994e-30	270	hypothetical protein B456_002G178000 [Gossypium raimondii]
Gh_D04G1736	AT4G20820.1	8.36904e-180	1329	PREDICTED: cannabidiolic acid synthase-like 1 [Gossypium hirsutum]
Gh_D02G0920	AT1G47480.1	1.28588e-151	1101	PREDICTED: probable carboxylesterase 2 [Gossypium hirsutum]
Gh_A06G1377	AT4G17220.1	0	1386	Microtubule-associated 70-5 -like protein [Gossypium arboreum]
Gh_A07G1126	AT3G08500.1	6.78236e-77	610	PREDICTED: transcription factor MYB46-like [Gossypium hirsutum]
Gh_D11G0999	AT3G61640.1	2.63797e-30	253	PREDICTED: arabinogalactan peptide 20-like [Gossypium raimondii]
Gh_D07G0750	AT1G66810.3	6.58033e-67	537	PREDICTED: zinc finger CCCH domain-containing protein 14-like [Gossypium hirsutum]
Gh_D06G1720	AT4G17220.1	0	1367	hypothetical protein GOBAR_DD12012 [Gossypium barbadense]
Gh_A13G0597	AT1G02170.1	6.30649e-82	650	PREDICTED: metacaspase-1-like [Gossypium hirsutum]
Gh_D08G0742	Na	Na	Na	hypothetical protein GOBAR_DD21316 [Gossypium barbadense]
Gh_D11G0254	AT4G12520.1	8.18749e-50	393	PREDICTED: 14 kDa proline-rich protein DC2.15-like [Gossypium raimondii]
Gh_A12G2553	AT5G65700.2	0	4173	PREDICTED: leucine-rich repeat receptor-like serine/threonine-protein kinase BAM1 [Gossypium hirsutum]
Gh_D09G1436	AT3G53950.1	0	2187	hypothetical protein GOBAR_DD02639 [Gossypium barbadense]
Gh_D11G3271	AT2G36870.1	1.62447e-164	1179	PREDICTED: probable xyloglucan endotransglucosylase/hydrolase protein 32 [Gossypium hirsutum]
Gh_A12G2681	AT4G23490.1	0	1913	PREDICTED: uncharacterized protein LOC107949024 [Gossypium hirsutum]
Gh_D11G1534	AT5G35750.1	0	3660	PREDICTED: histidine kinase 2-like isoform X2 [Gossypium hirsutum]
Gh_D04G1103	AT3G53380.1	0	2517	PREDICTED: L-type lectin-domain containing receptor kinase VIII.1-like [Gossypium hirsutum]
Gh_D03G0109	AT4G36360.1	0	3881	hypothetical protein GOBAR_DD21069 [Gossypium barbadense]
Gh_D05G1785	AT1G75680.1	0	1904	endoglucanase 10-like [Gossypium hirsutum]
Gh_D10G2603	AT3G14170.1	0	1335	hypothetical protein GOBAR_AA38913 [Gossypium barbadense]
Gh_D13G2038	AT5G20820.1	2.84022e-43	348	PREDICTED: uncharacterized protein LOC105784543 [Gossypium raimondii]
Gh_D09G2139	AT3G22950.2	2.62092e-124	892	PREDICTED: ADP-ribosylation factor-like protein 5 [Gossypium raimondii]
Gh_D08G0161	AT3G20830.1	9.60505e-169	1232	hypothetical protein GOBAR_DD14988 [Gossypium barbadense]
Gh_D10G1286	AT2G43120.1	3.68837e-149	1082	PREDICTED: pirin-like protein [Gossypium raimondii]
Gh_Sca005023G04	AT2G05920.1	0	2920	PREDICTED: subtilisin-like protease SBT1.8 [Gossypium hirsutum]
Gh_D08G1342	AT3G62280.1	0	1311	PREDICTED: GDSL esterase/lipase At3g62280-like [Gossypium hirsutum]
Gh_D09G2081	AT4G14940.1	0	2214	hypothetical protein GOBAR_DD32872 [Gossypium barbadense]
Gh_D07G0108	AT2G19580.1	1.14308e-136	991	hypothetical protein B456_001G011200 [Gossypium raimondii]
Gh_D12G2750	AT1G64060.1	0	3936	PREDICTED: respiratory burst oxidase homolog protein A-like isoform X1 [Gossypium raimondii]
Gh_D11G1400	AT4G13710.1	0	1778	PREDICTED: probable pectate lyase 8 [Gossypium hirsutum]
Gh_D03G0466	AT5G39100.1	5.77785e-97	721	PREDICTED: germin-like protein subfamily 1 member 13 [Gossypium hirsutum]
Gh_D03G0374	AT2G22430.1	9.57385e-76	599	hypothetical protein GOBAR_DD19781 [Gossypium barbadense]
Gh_D10G2113	AT2G39200.1	0	2010	PREDICTED: MLO-like protein 12 isoform X1 [Gossypium raimondii]
Gh_Sca005145G01	AT2G36010.1	2.08186e-178	1311	PREDICTED: transcription factor E2FA-like [Gossypium raimondii]
Gh_D05G1456	AT1G07650.1	0	2401	PREDICTED: probable LRR receptor-like serine/threonine-protein kinase At1g07650 isoform X1 [Gossypium raimondii]
Gh_D12G1438	AT3G48000.1	0	2255	hypothetical protein GOBAR_DD04569 [Gossypium barbadense]
Gh_D11G0249	AT4G12520.1	5.13155e-46	367	PREDICTED: 14 kDa proline-rich protein DC2.15-like [Gossypium hirsutum]
Gh_Sca005341G01	AT4G12350.1	4.20788e-100	753	PREDICTED: protein ODORANT1-like [Gossypium hirsutum]
Gh_D06G0045	AT5G42785.1	2.34047e-14	154	PREDICTED: uncharacterized protein LOC105774733 [Gossypium raimondii]
Gh_D13G1322	AT1G16310.1	0	1333	hypothetical protein GOBAR_DD34888 [Gossypium barbadense]
Gh_D10G1657	AT1G54610.3	0	1964	PREDICTED: probable serine/threonine-protein kinase At1g54610 [Gossypium hirsutum]
Gh_D05G0485	AT5G23340.1	2.26432e-24	257	PREDICTED: F-box/LRR-repeat protein 20-like [Gossypium hirsutum]
Gh_D11G2321	AT5G17640.1	0	1654	PREDICTED: uncharacterized protein LOC107913323 [Gossypium hirsutum]
Gh_D13G2031	AT5G20870.1	0	1634	PREDICTED: glucan endo-1,3-beta-glucosidase 5-like [Gossypium raimondii]
Gh_D12G0510	AT1G19020.1	6.62267e-23	207	PREDICTED: uncharacterized protein LOC107916712 [Gossypium hirsutum]
Gh_D08G1728	AT1G32450.1	0	2497	PREDICTED: protein NRT1/ PTR FAMILY 7.3 [Gossypium raimondii]
Gh_D07G1810	AT5G38880.1	0	3131	hypothetical protein B456_001G207000 [Gossypium raimondii]
Gh_A11G3082	AT4G13710.1	0	1779	PREDICTED: probable pectate lyase 8 [Gossypium hirsutum]
Gh_D01G0335	AT4G10780.2	1.50796e-23	266	hypothetical protein GOBAR_DD33227 [Gossypium barbadense]
Gh_D10G1132	AT5G01890.1	0	3216	PREDICTED: leucine-rich repeat receptor-like protein kinase PXC2 [Gossypium hirsutum]
Gh_D05G3245	AT3G14460.1	1.93333e-46	440	hypothetical protein GOBAR_DD19840 [Gossypium barbadense]
Gh_D07G0219	AT2G25790.1	0	2542	PREDICTED: probably inactive leucine-rich repeat receptor-like protein kinase At2g25790 [Gossypium hirsutum]
Gh_A12G1292	AT1G27440.1	0	1896	PREDICTED: probable beta-1,4-xylosyltransferase IRX10 [Gossypium hirsutum]
Gh_D12G1963	AT5G61480.1	0	3465	PREDICTED: leucine-rich repeat receptor-like protein kinase TDR [Gossypium hirsutum]
Gh_D11G1566	AT4G03965.1	3.7224e-39	337	PREDICTED: uncharacterized protein LOC107912630 [Gossypium hirsutum]
Gh_D05G1682	AT4G17220.1	0	1375	PREDICTED: microtubule-associated protein 70-5-like isoform X2 [Gossypium hirsutum]
Na: Because E value (E-value>10-5) is too large to find the orthologous of Arabidopsis thaliana gene corresponding to Gossypium hirsutum
