# Supplementary material for: Genome-Wide Investigation and Co-Expression Network Analysis of SBT Family Gene in Gossypium
Source: Int J Mol Sci. 2023 Mar 17;24(6):5760. doi: 10.3390/ijms24065760 (PMC10056545; doi:10.3390/ijms24065760)
Supplement: Supplementary file 1 [file ijms-24-05760-s001.zip › TableS9.xlsx]

## Sheet: network
node1	node2	MR	Relationship
AT1G20950	AT2G05920	13.87	positive
AT3G07540	AT3G14240	8.24	positive
AT3G21190	AT2G05920	14.28	positive
AT2G27040	AT2G05920	24.82	positive
AT1G01900	AT1G79620	11.79	positive
AT5G67230	AT1G01900	44.44	positive
AT4G23490	AT2G05920	28.73	positive
AT3G14067	AT1G80310	12.76	positive
AT5G27150	AT3G14067	3.53	positive
AT3G14240	AT5G51550	12.95	positive
AT4G38660	AT3G14240	20.16	positive
AT1G53300	AT2G05920	17.69	positive
AT1G55360	AT3G14240	11.5	positive
AT3G08680	AT2G05920	10.55	positive
AT3G14240	AT5G65700	11.61	positive
AT1G69295	AT5G67360	4.04	positive
AT2G05790	AT3G14240	2.61	positive
AT4G16340	AT2G05920	25.9	positive
AT3G14240	AT5G55230	22.84	positive
AT5G65700	AT2G05920	2.56	positive
AT3G13510	AT2G05920	26.74	positive
AT1G01900	AT5G09760	24.48	positive
AT5G16000	AT3G14240	7.83	positive
AT1G47128	AT3G14067	2.99	positive
AT2G05920	AT3G51950	28.22	positive
AT3G16060	AT2G05920	25.8	positive
AT3G14067	AT5G65990	11.31	positive
AT5G10930	AT3G14067	24.64	positive
AT5G60690	AT2G05920	12.01	positive
AT3G14067	AT1G08190	4.63	positive
AT5G67360	AT3G21750	19.84	positive
AT1G74720	AT2G05920	23.13	positive
AT2G05920	AT5G01890	9.61	positive
AT1G78060	AT2G05920	7.41	positive
AT3G14067	AT2G45960	24.15	positive
AT3G14067	AT5G67360	21.66	positive
AT3G14240	AT1G14920	12.85	positive
AT3G14240	AT1G68400	22.52	positive
AT4G02680	AT2G05920	25.51	positive
AT3G14240	AT1G15000	11.16	positive
AT4G00740	AT2G05920	5.9	positive
AT4G29720	AT2G05920	23.35	positive
AT3G14067	AT3G27020	1.56	positive
AT4G22130	AT2G05920	9.07	positive
AT1G01900	AT1G02205	16.53	positive
AT3G14240	AT1G51570	3.94	positive
AT5G47780	AT3G14240	27.67	positive
AT2G35860	AT2G05920	24.78	positive
AT1G64390	AT2G05920	19.31	positive
AT5G09760	AT2G05920	8.61	positive
AT1G74720	AT3G14240	22.43	positive
AT2G05920	AT2G26730	20.78	positive
AT1G01900	AT5G07030	19.78	positive
AT1G07080	AT3G14067	13.23	positive
AT4G38660	AT2G05920	14.72	positive
AT3G14067	AT1G51140	7.05	positive
AT1G01900	AT5G07800	18.71	positive
AT1G70370	AT2G05920	5.72	positive
AT3G14240	AT2G27810	25.82	positive
AT1G01900	AT2G04850	5.81	positive
AT1G19920	AT2G05920	16.3	positive
AT5G63940	AT2G05920	20.1	positive
AT3G14067	AT5G47640	12.69	positive
AT5G67360	AT4G00740	21.8	positive
AT3G14240	AT1G28440	20.25	positive
AT5G55480	AT2G05920	7.4	positive
AT4G29680	AT2G05920	28.15	positive
AT1G01900	AT5G60490	20.37	positive
AT3G19820	AT3G14240	15.34	positive
AT5G53140	AT5G67360	14.73	positive
AT5G26780	AT2G05920	21.95	positive
AT1G01900	AT5G03170	9.45	positive
AT5G15740	AT2G05920	21.57	positive
AT4G36360	AT2G05920	4.1	positive
AT5G67360	AT4G00430	16.88	positive
AT3G14240	AT5G01020	26.45	positive
AT1G68560	AT3G14240	9.77	positive
AT1G53240	AT2G05920	27.15	positive
AT3G14240	AT5G66560	26.09	positive
AT3G14240	AT4G34980	7.41	positive
AT3G14240	AT1G09750	23.49	positive
AT3G56370	AT2G05920	3.06	positive
AT1G78680	AT3G14067	3.99	positive
AT1G28440	AT2G05920	11.28	positive
AT5G26850	AT3G14240	19.68	positive
AT3G17840	AT2G05920	17.27	positive
AT1G01900	AT2G28410	18.22	positive
AT2G47160	AT2G05920	29.19	positive
AT2G34710	AT2G05920	28.9	positive
AT5G62890	AT2G05920	22.09	positive
AT5G67360	AT2G05920	10.87	positive
AT2G05920	AT1G41830	26.87	positive
AT5G14880	AT3G14067	28.76	positive
AT3G14067	AT4G38250	11.5	positive
AT4G34980	AT5G67360	27.21	positive
AT3G14067	AT4G38220	29.05	positive
AT3G14067	AT5G13640	6.37	positive
AT1G01900	AT1G26570	24.05	positive
AT5G67360	AT2G01820	18.64	positive
AT3G14067	AT1G58360	16.57	positive
AT1G01900	AT3G10080	3.72	positive
AT2G04280	AT2G05920	13.31	positive
AT3G18490	AT5G67360	1.07	positive
AT2G05920	AT2G01820	17.37	positive
AT5G14880	AT2G45960	12.93	positive
AT5G09760	AT1G70370	5.16	positive
AT1G20950	AT1G41830	29.96	positive
AT2G34710	AT2G27040	27.14	positive
AT3G08680	AT5G66560	5.98	positive
AT2G28410	AT5G03170	5.82	positive
AT1G80310	AT4G38250	8.16	positive
AT4G34980	AT3G18490	8.14	positive
AT4G38660	AT1G15000	13.06	positive
AT5G27150	AT1G08190	15.81	positive
AT3G08680	AT5G65700	5.31	positive
AT3G08680	AT2G05790	23.83	positive
AT2G27810	AT1G68400	20.08	positive
AT4G34980	AT1G28440	2.04	positive
AT4G22130	AT5G15740	27.49	positive
AT3G56370	AT1G78060	19.02	positive
AT3G19820	AT2G04280	26.25	positive
AT3G21190	AT1G64390	14.75	positive
AT3G10080	AT2G28410	1.29	positive
AT2G04280	AT4G00740	2.27	positive
AT4G34980	AT3G56370	25.42	positive
AT2G05790	AT1G68400	13.38	positive
AT1G68560	AT1G14920	15.68	positive
AT3G13510	AT5G65700	21.49	positive
AT1G79620	AT2G04850	6.4	positive
AT5G07030	AT2G26730	19.68	positive
AT3G10080	AT5G09760	26.44	positive
AT2G27810	AT1G51570	7.03	positive
AT3G21190	AT1G41830	3.08	positive
AT5G55480	AT2G27040	20.07	positive
AT5G60490	AT2G04850	9.1	positive
AT1G64390	AT4G36360	1	positive
AT1G51570	AT1G14920	18.75	positive
AT1G28440	AT2G01820	17.66	positive
AT3G21190	AT2G26730	12.19	positive
AT5G62890	AT3G56370	22.74	positive
AT1G68560	AT5G26850	20.4	positive
AT3G08680	AT5G01890	2.84	positive
AT2G04280	AT2G26730	25.75	positive
AT5G60490	AT3G10080	16.28	positive
AT1G20950	AT3G16060	29.96	positive
AT3G16060	AT4G00740	14.55	positive
AT5G53140	AT4G00740	16.78	positive
AT1G28440	AT3G51950	11.03	positive
AT4G38660	AT1G78060	26.75	positive
AT2G05790	AT4G38660	5.41	positive
AT3G56370	AT2G26730	3.82	positive
AT5G07030	AT1G78060	6.1	positive
AT1G68560	AT2G04280	11.6	positive
AT4G38660	AT3G13510	10.76	positive
AT1G70370	AT2G26730	17.18	positive
AT3G08680	AT2G27040	17.16	positive
AT1G47128	AT1G58360	28.11	positive
AT1G28440	AT4G00740	21.57	positive
AT3G07540	AT5G51550	7.54	positive
AT4G22130	AT1G64390	14.18	positive
AT4G36360	AT1G41830	4.78	positive
AT2G05790	AT5G26850	9.47	positive
AT5G15740	AT1G41830	26.97	positive
AT5G03170	AT2G04850	5.53	positive
AT3G16060	AT5G26780	16.1	positive
AT5G65700	AT1G51570	16.76	positive
AT4G16340	AT5G65700	17.41	positive
AT1G47128	AT4G38250	27.43	positive
AT1G64390	AT2G26730	24.38	positive
AT1G78680	AT1G51140	16.37	positive
AT4G36360	AT1G70370	23.65	positive
AT3G19820	AT1G68560	10.43	positive
AT4G16340	AT5G01890	9.5	positive
AT5G55480	AT5G07030	28.42	positive
AT1G53300	AT3G56370	11.18	positive
AT4G22130	AT1G78060	13.34	positive
AT5G26850	AT5G55230	6.93	positive
AT3G13510	AT3G56370	5.04	positive
AT5G60690	AT5G01890	23.69	positive
AT1G68560	AT4G34980	18.79	positive
AT5G26780	AT4G00740	8.46	positive
AT5G55480	AT5G65700	11.33	positive
AT2G04280	AT4G36360	22.58	positive
AT3G16060	AT3G56370	9.06	positive
AT3G17840	AT3G56370	1.69	positive
AT5G60690	AT2G34710	2.17	positive
AT4G29720	AT2G26730	19.14	positive
AT4G22130	AT5G55480	21.52	positive
AT1G20950	AT4G22130	11.58	positive
AT1G74720	AT4G34980	18.73	positive
AT4G16340	AT4G02680	9.34	positive
AT2G34710	AT3G51950	21.25	positive
AT2G04280	AT5G55230	14.86	positive
AT3G21190	AT5G07030	26.75	positive
AT1G19920	AT1G53240	13.87	positive
AT5G65700	AT3G56370	4.21	positive
AT5G55480	AT4G16340	8.1	positive
AT2G04280	AT3G21190	12.45	positive
AT5G67230	AT5G03170	34.96	positive
AT5G65990	AT4G00430	6.34	positive
AT2G05790	AT5G65700	18.06	positive
AT4G22130	AT3G21190	5.25	positive
AT4G34980	AT2G26730	14.28	positive
AT5G55480	AT2G01820	16.28	positive
AT4G38660	AT5G07030	7.19	positive
AT5G65700	AT5G66560	26.34	positive
AT3G08680	AT2G26730	24.06	positive
AT4G23490	AT5G15740	6.83	positive
AT5G60490	AT5G03170	1.66	positive
AT3G08680	AT2G27810	26.89	positive
AT1G20950	AT5G26780	4.95	positive
AT2G35860	AT2G26730	25.63	positive
AT1G51570	AT5G55230	7.57	positive
AT4G16340	AT3G56370	9.9	positive
AT5G16000	AT1G28440	15.82	positive
AT3G19820	AT1G55360	6.73	positive
AT5G65700	AT4G02680	21.67	positive
AT5G60490	AT5G07800	22.8	positive
AT5G03170	AT5G07800	16.38	positive
AT3G19820	AT5G65700	27	positive
AT3G19820	AT3G08680	9.62	positive
AT2G05790	AT1G51570	13.29	positive
AT1G55360	AT2G05790	4.55	positive
AT1G55360	AT1G28440	24.86	positive
AT2G04280	AT4G16340	18.26	positive
AT4G38660	AT3G56370	1.77	positive
AT4G36360	AT3G56370	9.93	positive
AT3G13510	AT3G51950	27.43	positive
AT2G04280	AT3G56370	13.18	positive
AT3G07540	AT1G68400	21.99	positive
AT2G35860	AT1G70370	21.03	positive
AT1G74720	AT4G02680	24.26	positive
AT4G29720	AT5G65700	16.35	positive
AT1G51570	AT1G68400	18.32	positive
AT1G64390	AT1G41830	3.62	positive
AT1G53300	AT5G55480	12.5	positive
AT2G45960	AT3G27020	25.58	positive
AT1G19920	AT1G70370	18.89	positive
AT3G16060	AT5G63940	29.55	positive
AT5G47640	AT1G51140	6.58	positive
AT3G07540	AT5G16000	12.62	positive
AT5G26850	AT2G27040	11.63	positive
AT3G21190	AT1G70370	11.47	positive
AT2G27040	AT5G01890	28	positive
AT5G14880	AT4G38220	29.23	positive
AT3G19820	AT5G62890	23.72	positive
AT3G17840	AT5G01890	5	positive
AT5G55480	AT5G01890	18.32	positive
AT5G62890	AT3G08680	23.65	positive
AT2G35860	AT5G15740	10.16	positive
AT1G64390	AT2G35860	19.24	positive
AT2G34710	AT5G65700	22.09	positive
AT3G21190	AT4G36360	11.91	positive
AT3G08680	AT3G17840	9.16	positive
AT2G04280	AT1G78060	26.87	positive
AT3G10080	AT2G04850	2.54	positive
AT3G21190	AT2G35860	2.88	positive
AT2G47160	AT1G28440	16.53	positive
AT4G29680	AT4G00740	16.79	positive
AT1G70370	AT3G56370	12.6	positive
AT5G55480	AT4G36360	26.13	positive
AT5G60690	AT4G02680	9.55	positive
AT5G09760	AT2G04850	29.53	positive
AT2G04280	AT4G34980	16.73	positive
AT5G60690	AT5G63940	9.97	positive
AT5G14880	AT5G13640	9.04	positive
AT1G53300	AT2G26730	7.49	positive
AT5G07030	AT5G01890	27.13	positive
AT4G16340	AT2G27040	15.86	positive
AT5G47780	AT5G55230	21.47	positive
AT4G38220	AT4G38250	12.72	positive
AT5G62890	AT5G65700	2.74	positive
AT2G05790	AT2G27810	6.15	positive
AT4G29680	AT5G26780	22.25	positive
AT3G19820	AT5G01020	8.82	positive
AT4G22130	AT1G41830	29.3	positive
AT1G55360	AT3G13510	2.91	positive
AT5G16000	AT2G26730	27.1	positive
AT5G65700	AT5G01890	7.06	positive
AT4G22130	AT4G36360	23.95	positive
AT1G53300	AT1G64390	13.63	positive
AT4G23490	AT3G56370	27.56	positive
AT4G38660	AT2G27040	12.74	positive
AT2G05790	AT3G07540	13.01	positive
AT4G36360	AT5G15740	2.18	positive
AT5G60490	AT2G28410	5.47	positive
AT4G38660	AT1G68400	12.41	positive
AT5G26850	AT5G66560	19.6	positive
AT1G79620	AT5G03170	7.3	positive
AT2G05790	AT5G16000	14.1	positive
AT3G08680	AT5G55480	1.3	positive
AT4G36360	AT1G78060	22.94	positive
AT3G08680	AT4G16340	5.07	positive
AT5G60490	AT1G79620	15.29	positive
AT5G10930	AT1G51140	6.25	positive
AT2G45960	AT4G00430	3.66	positive
AT1G19920	AT3G56370	23.31	positive
AT5G55480	AT3G56370	4.21	positive
AT3G08680	AT3G56370	1.86	positive
AT2G05790	AT5G66560	11.57	positive
AT4G22130	AT5G26780	11.25	positive
AT5G65990	AT3G21750	1.41	positive
AT2G05790	AT3G13510	16.4	positive
AT3G27020	AT5G13640	7.74	positive
AT4G34980	AT5G65700	11.51	positive
AT2G27040	AT3G56370	9.03	positive
AT3G10080	AT5G03170	9.3	positive
AT5G16000	AT5G66560	16.91	positive
AT2G27810	AT3G56370	28.77	positive
AT3G56370	AT5G66560	23.79	positive
AT2G28410	AT2G04850	9.91	positive
AT5G65700	AT1G28440	17.06	positive
AT2G35860	AT1G41830	8.23	positive
AT5G27150	AT1G47128	28.7	positive
AT4G38660	AT5G01890	5.91	positive
AT1G07080	AT4G38250	27.66	positive
AT3G16060	AT4G22130	25.74	positive
AT4G02680	AT2G01820	23.09	positive
AT4G38660	AT5G65700	3.99	positive
AT3G17840	AT5G65700	6.23	positive
AT1G68560	AT1G51570	23.53	positive
AT3G10080	AT4G29720	23.84	positive
AT2G04280	AT4G22130	26.44	positive
AT1G28440	AT4G02680	28.27	positive
AT5G15740	AT3G56370	14.63	positive
AT5G01020	AT1G14920	20.56	positive
AT3G19820	AT2G05790	2.13	positive
AT4G23490	AT5G09760	29.11	positive
AT2G47160	AT5G14880	28.57	positive
AT3G17840	AT3G13510	11.34	positive
AT2G05790	AT1G70370	25.57	positive
AT1G68560	AT5G55230	2.92	positive
AT5G27150	AT4G38250	11.89	positive
AT5G55480	AT5G66560	20.68	positive
AT4G38660	AT5G55480	11.61	positive
AT2G05790	AT3G56370	13.67	positive
AT3G17840	AT4G38660	3.08	positive
AT5G51550	AT1G68400	2.92	positive
AT1G64390	AT4G00740	23.84	positive
AT3G08680	AT1G53300	9.29	positive
AT3G08680	AT3G16060	29.03	positive
AT3G56370	AT5G01890	6.69	positive
AT3G19820	AT5G26850	7.94	positive
AT1G20950	AT1G53240	7.46	positive
AT3G19820	AT5G55480	16.36	positive
AT4G29680	AT1G20950	29.7	positive
AT5G65700	AT2G26730	15.73	positive
AT5G60690	AT5G65700	25.9	positive
AT3G08680	AT4G38660	20.23	positive
AT4G36360	AT2G27040	26.45	positive
AT4G36360	AT2G35860	8.61	positive
AT3G08680	AT2G04280	1.89	positive
AT3G21190	AT5G15740	6.23	positive

## Sheet: annotation
ID	other name	annotation
AT2G27040	AGO4	AGO4 is a member of a class of PAZ/PIWI domain containing proteins involved in siRNA mediated gene silencing.Loss of function mutations have reduced site specific CpNpG and CpHpH methylation, abnormal ovule/megagametophyte develoment and increased susceptibility to bacterial pathogens including Tobacco rattle virus.
AT1G01900	ATSBT1.1	Encodes AtSBT1.1, a subtilisin-like serine protease. Cleaves the phytosulfokine AtPSK4, a growth promoting peptide.
AT4G38660		Pathogenesis-related thaumatin superfamily protein
AT1G69295	PDCB4	Encodes a member of the X8-GPI family of proteins. It localizes to the plasmodesmata and is predicted to bind callose.
AT4G16340	SPK1	Encodes SPIKE1 (SPK1), the lone DOCK family guanine nucleotide exchange factor (GEF) in Arabidopsis. SPK1 is a peripheral membrane protein that accumulates at, and promotes the formation of, a specialized domain of the endoplasmic reticulum (ER) termed the ER exit site (ERES). SPK1 promotes polarized growth and cell-cell adhesion in the leaf epidermis. Mutant has seedling lethal; cotyledon, leaf-…
AT5G65700	BAM1	Encodes a CLAVATA1-related receptor kinase-like protein required for both shoot and flower meristem function. Very similar to BAM2,with more than 85% a.a. identity. It has a broad expression pattern and is involved in vascular strand development in the leaf, control of leaf shape, size and symmetry, male gametophyte development and ovule specification and function. Anthers of double mutants (bam1…
AT1G47128	RD21	Cysteine proteinase precursor-like protein/ dehydration stress-responsive gene (RD21). Has been shown to have peptide ligase activity and protease activity in vitro. RD21 is involved in immunity to the necrotrophic fungal pathogen Botrytis cinerea.Activity detected in root, leaf, flower and cell culture.
AT3G16060		ATP binding microtubule motor family protein
AT5G10930	CIPK5	Encodes CBL-interacting protein kinase 5
AT3G14067	SBT1.4	Encodes a protein with similarity to serine protease, subtilisin, that is upregulated during senescence and expressed in the arial portions of the plant.Loss of function mutations have increased branch number but normal silique length and seed set and therefore have increased fertility.
AT5G67360	SBT1.7	Encodes a subtilisin-like serine protease essential for mucilage release from seed coats.
AT4G22130	SRF8	STRUBBELIG-receptor family 8
AT2G35860	FLA16	Fasciclin-like arabinogalactan protein. Possibly involved in embryogenesis and seed development.
AT5G09760	PMEI-PME51	Pectin methylesterase inhibitor; INVI-PMEI protein isoform which clustered with a PME.
AT1G74720	MCTP15	Encodes a putative transmembrane protein carrying four C(2) domains, suggesting that QKY may function in membrane trafficking in a Ca(2+)-dependent fashion. Mutant analysis shows that this gene is involved in organ development.
AT2G05920	SBT1.8	SBT1.8, SUBTILASE 1.8 Subtilase family protein
AT3G14240	SBT1.5	Subtilase family protein
AT1G19920	APS2	encodes a chloroplast form of ATP sulfurylase.
AT4G29680		Alkaline-phosphatase-like family protein
AT3G19820	DWF1	Involved in the conversion of the early brassinosteroid precursor 24-methylenecholesterol to campesterol. Brassinosteroids affect cellular elongation. Mutants have dwarf phenotype. DWF1 is a Ca2+-dependent calmodulin-binding protein.
AT5G26780	SHM2	Encodes a protein with serine hydroxymethyltransferase activity which is thought to be localized in the mitochondrial matrix. SHM2 expression fails to rescue the conditional lethal phenotype of the shm1-1 mutant, defective in SHM1.
AT5G15740	RRT1	RRT1 is a member of a novel glycosyltransferase famly in plants. It functions as a rhamnosyltransferase, elongating the RG-1 backbone. It functions during seed coat mucilage development.
AT1G68560	AXY3	Encodes a bifunctional alpha-l-arabinofuranosidase/beta-d-xylosidase that belongs to family 3 of glycoside hydrolases.
AT2G34710	PHB	Dominant PHB mutations cause transformation of abaxial leaf fates into adaxial leaf fates. Encodes a member of HD-Zip family which contains homeodomain-leucine zipper domains and domain similar to a mammalian sterol binding domain. Has overlapping functions with PHAVOLUTA, REVOLUTA and CORONA.
AT5G14880	KUP8	Potassium transporter family protein
AT4G34980	SBT1.6	Serine protease similar to subtilisin
AT3G18490	ASPG1	Encodes ASPG1 (ASPARTIC PROTEASE IN GUARD CELL 1). Functions in drought avoidance through abscisic acid (ABA) signalling in guard cells.
AT3G21190	MSR1	O-fucosyltransferase family protein
AT2G04280		calcium ion-binding protein
AT3G13510		carboxyl-terminal peptidase, putative
AT1G79620	VRLK1	VRLK1 is a LRR kinase involved in switching between cell elongation and secondary cell wall thickening.VRLK1 is a member of a gene family that includes a small number of recently duplicated paralogs.
AT5G07030		Eukaryotic aspartyl protease family protein
AT3G10080		RmlC-like cupins superfamily protein
AT2G27810	NAT12	Encodes a plasma-membrane localized nucleobase transporter capable of transporting adenine, guanine, uracil and hypoxanthine. Likely to be a proton-nucleobase symporter.
AT5G55480	GDPDL4	Glycerophosphoryl diester phosphodiesterase-like protein involved in cell wall cellulose accumulation and pectin linking. Impacts root hair, trichome and epidermal cell development. The mRNA is cell-to-cell mobile
AT5G60490	FLA12	Encodes a member of fasciclin-like arabinogalactan proteins (FLAs) containing a cell adhesion fasciclin (FAS) domain. Most strongly expressed in interfascicular fiber cells where it is localize to the plasma membrane-secondary cell wall boundary. Mutations result in altered stem biomechanics with reduced tensile strength and reduced tensile modulus of elasticity, as well as altered cell wall arch…
AT1G64390	GH9C2	glycosyl hydrolase 9C2
AT1G51570	FTIP4	Required for maintenance of inflorescence and shoot SAMs and normal development of the derived vascular cambium, functions in the SAM to promote continuous organogenesis, affects SAM development through STM, where it affects intracellular localization of STM in SAM cells in the peripheral region and prevents STM localization toward the cell wall of SAM cells in the peripheral region.
AT5G62890		Xanthine/uracil permease family protein
AT3G08680		Leucine-rich repeat protein kinase family protein
AT1G20950		Phosphofructokinase family protein
AT5G53140		Protein phosphatase 2C family protein
AT2G05790		O-Glycosyl hydrolases family 17 protein
AT3G56370	IRK	LRR-RLK with distinct polar localization within the plasma membrane in different cell types of the root. Mutants show defects in cell divisions within the root ground tissue.
AT1G70370	PG2	Polygalacturonase involved in cell wall modification.
AT3G07540	FH10	Actin-binding FH2 (formin homology 2) family protein
AT4G36360	BGAL3	putative beta-galactosidase (BGAL3 gene)
AT5G60690	REV	REVOLUTA regulates meristem initiation at lateral positions. a member of a small homeodomain-leucine zipper family. Has overlapping functions with PHAVOLUTA and PHABULOSA. The mRNA is cell-to-cell mobile.
AT3G17840	RLK902	Encodes a receptor-like kinase found at the cell surface of various tissues. Its function remains unknown.
AT4G29720	PAO5	polyamine oxidase 5
AT5G67230	I14H	Encodes a member of the GT43 family glycosyltransferases involved in glucuronoxylan biosynthesis: AT2G37090 (IRX9) and AT1G27600 (IRX9-L or I9H, IRX9 homolog); AT4G36890 (IRX14) and AT5G67230 (IRX14-L or I14H, IRX14 homolog). They form two functionally non-redundant groups essential for the normal elongation of glucuronoxylan backbone. I9H functions redundantly with IRX9, I14H is redundant with I…
AT1G55360		tRNA-splicing ligase (DUF239)
AT2G45960	ATHH2	a member of the plasma membrane intrinsic protein subfamily PIP1. localizes to the plasma membrane and exhibits water transport activity in Xenopus oocyte. expressed ubiquitously and protein level decreases slightly during leaf development. Involved redundantly with PIP1;1/3/4/5 in hydraulics and carbon fixation, regulates the expression of related genes that affect plant growth and development.
AT1G53300	TTL1	Encodes one of the 36 carboxylate clamp (CC)-tetratricopeptide repeat (TPR) proteins (Prasad 2010, Pubmed ID: 20856808) with potential to interact with Hsp90/Hsp70 as co-chaperones. The TTL family is required for osmotic stress tolerance and male sporogenesis. The mRNA is cell-to-cell mobile.
AT4G38220	AQI	Peptidase M20/M25/M40 family protein
AT4G23490		fringe-like protein (DUF604)
AT5G26850	EFOP4	Part of a nanodomain complex that tethers PI4Kα1 to the plasma membrane.
AT5G16000	NIK1	NSP-interacting kinase (NIK1), receptor-like kinase, involved in defense response against geminivirus It acts as a virulence target of the begomovirus nuclear shuttle protein (NSP).
AT5G27150	NHX1	Encodes a vacuolar sodium/proton antiporter involved in salt tolerance, ion homeostasis, and leaf development. The mRNA is cell-to-cell mobile.
AT1G07080		Thioredoxin superfamily protein
AT1G08190	ZIP2	Might be involved in protein sorting to the vacuole. The mRNA is cell-to-cell mobile.
AT3G21750	UGT71B1	Encodes a glucosyltransferase that can attach glucose to a number of hydroxylated phenolic compounds as well as quercetins in vitro
AT3G27020	YSL6	Arabidopsis thaliana metal-nicotianamine transporter YSL6
AT1G02205	CER1	Expression of the CER1 gene associated with production of stem epicuticular wax and pollen fertility. Biochemical studies showed that cer1 mutants are blocked in the conversion of stem wax C30 aldehydes to C29 alkanes, and they also lack the secondary alcohols and ketones. These suggested the CER1 protein is an aldehyde decarbonylase, but the exact molecular function of this protein remains to be…
AT2G26730		Leucine-rich repeat protein kinase family protein
AT1G51140	AKS1	Encodes a basic helix-loop-helix-type transcription factor involved in photoperiodism flowering. Binds to the E-box cis-element in the CONSTANS (CO) promoter to regulate flowering. Interacts with CFL1 and along with CFLAP2 negatively regulates cuticle development. Binds to the potassium channel gene KAT1 as a dimer. The DNA-binding capacity is inhibited in response to ABA through phosphorylation-…
AT5G07800		Flavin-binding monooxygenase family protein
AT2G04850		Auxin-responsive family protein
AT5G47640	NF-YB2	Involved in the regulation of response to nutrient levels.
AT4G00740	QUA3	Encodes a Golgi-localized type II membrane pectin methyltransferase regulating cell wall biosynthesis in suspension cells.
AT1G28440	HSL1	LRR-RLK protein involved in seed longevity. Induced by aging, mutant seeds show decreased germination rate upon aging treatment.
AT5G03170	FLA11	Encodes FLA11, a member of fasciclin-like arabinogalactan proteins (FLAs) containing a cell adhesion fasciclin (FAS) domain. Mutations result in altered stem biomechanics with reduced tensile strength and reduced tensile modulus of elasticity, as well as altered cell wall architecture and composition, with increased cellulose microfibril angle, reduced arabinose, galactose and cellulose content.I…
AT4G00430	PIP1;4	a member of the plasma membrane intrinsic protein subfamily PIP1. involved redundantly with PIP1;1/2/3/5 in hydraulics and carbon fixation, regulates the expression of related genes that affect plant growth and development.
AT5G66560		Phototropic-responsive NPH3 family protein
AT5G13640	PDAT1	arabidopsis phospholipid:diacylglycerol acyltransferase (PDAT)
AT2G01820	TMK3	Transmembrane kinase (TMK), member of the plant receptor-like kinase (RLK) family. TMKs are characterized by an extracellular leucine-rich-repeat (LRR) domain, a single transmembrane region and a cytoplasmic kinase domain. TMKs have been shown to act as critical modulators of cell expansion and cell proliferation.
AT1G14920	RGA2	Similar to a putative transcription factor and transcriptional coactivators. Repressor of GA responses and involved in gibberellic acid mediated signaling. Member of the DELLA proteins that restrain the cell proliferation and expansion that drives plant growth. The protein undergoes degradation in response to GA via the 26S proteasome. GAI may be involved in reducing ROS accumulation in response …
AT5G01890	PXC2	Leucine-rich receptor-like protein kinase family protein;
AT1G78060		Glycosyl hydrolase family protein
AT1G58360	AAP1	Encodes AAP1 (amino acid permease 1), a neutral amino acid transporter expressed in seeds. Functions in amino acid uptake into embryos. The transporter also functions in acquisition of glutamate and neutral amino acids by the root.
AT5G51550	EXL3	EXORDIUM like 3
AT1G41830	SKS6	SKU5-similar 6
AT3G51950		Contains single CCCH domain.
AT5G55230	ATMAP65-1	Binds and bundles microtubules. Plays a role in stabilizing anti-parallel microtubules in the central spindle at anaphase to early cytokinesis but is not essential at the midline of the phragmoplast at later stages. The timing with which the MAP65-1 was targeted to the spindle appears to be regulated by a phosphorylation sensitive switch. Enhances microtubule polymerization, promotes nucleation a…
AT1G53240	MMDH1	mMDH1 encodes a mitochrondrial malate dehydrogenase. It is expressed at higher levels than the other mitochrondrial isoform mMDH2 (At3G15020) according to transcript and proteomic analyses.
AT1G68400		leucine-rich repeat transmembrane protein kinase family protein;
AT5G63940		kinase with adenine nucleotide alpha hydrolases-like domain-containing protein
AT4G38250		Transmembrane amino acid transporter family protein
AT5G01020	PBL8	Protein kinase superfamily protein
