# Supplementary material for: Genome-Wide Investigation and Co-Expression Network Analysis of SBT Family Gene in Gossypium
Source: Int J Mol Sci. 2023 Mar 17;24(6):5760. doi: 10.3390/ijms24065760 (PMC10056545; doi:10.3390/ijms24065760)
Supplement: Supplementary file 1 [file ijms-24-05760-s001.zip › TableS10.xlsx]

## Sheet: salt_shoot
ID	Control-Shoots-6.0h_Rep1	Control-Shoots-6.0h_Rep2	Control-Shoots-12.0h_Rep1	Control-Shoots-12.0h_Rep2	Saltstress-Shoots-6.0h_Rep1	Saltstress-Shoots-6.0h_Rep2	Saltstress-Shoots-12.0h_Rep1	Saltstress-Shoots-12.0h_Rep2		ID	6h_Shoot_Salt/CK	12h_Shoot_Salt/CK
267619_at	170.34	175	169.97	166.85	158.95	176.29	165.69	189.05		AT2G26730	-0.0428231	0.0747842
267316_at	87.13	72.93	100.06	103.49	55.96	58.95	49.68	72.2		AT2G34710	-0.478108	-0.739922
266927_at	2017.66	1761.41	2254.76	2151.5	1921.09	2265.73	1782.45	1838.93		AT2G45960	0.147824	-0.283015
266314_at	168.6	164.69	207.9	186.5	165.55	153.79	166.81	153.51		AT2G27040	-0.0616848	-0.300146
266254_at	184	195.56	203.54	152.79	163.92	179.72	189.02	169.96		AT2G27810	-0.14343	0.0106895
266022_at	386.6	410.68	538.41	519.36	366.05	402.51	631.46	531.04		AT2G05920	-0.0529286	0.136205
265377_at	939.99	862.14	848.03	753.22	839.21	875.9	452.77	632.85		AT2G05790	-0.071402	-0.560679
264315_at	718.04	675	1020.4	1055.69	538.97	518.76	610.06	726.56		AT1G70370	-0.397265	-0.63528
264147_at	101.95	84.81	152.27	92	698.08	589.6	426.6	434.48		AT1G02205.1	2.78552	1.81767
264146_at	225.23	184.43	344	212.56	1225.62	1251.62	1009.43	810.67		AT1G02205.2	2.59623	1.70941
263942_at	81.23	86.15	108.58	114.16	79.89	111.79	144.7	97.66		AT2G35860	0.195573	0.121791
263629_at	26.79	20.62	36.92	38.17	60.54	53.54	59.6	59.4		AT2G04850	1.26678	0.664269
263590_at	263.22	269.47	239.55	234.86	288.86	310.19	294.19	239.33		AT2G01820	0.16938	0.169408
263326_at	406.8	443.23	360.47	339.65	521.33	561.59	664.23	456.64		AT2G04280	0.349341	0.678945
262850_at	313.68	304.62	228.21	235.91	223.75	280.13	193.88	232.81		AT1G14920	-0.295227	-0.12131
262806_at	232.97	221.46	321.86	306.53	191.84	221.67	484.76	255.42		AT1G20950	-0.136136	0.236216
262230_at	480.44	483.97	312.22	339.48	224.27	264.83	275.39	227.08		AT1G68560	-0.979517	-0.375171
262209_at	83.59	108.05	113.96	126.99	92.89	101.18	137.76	117		AT1G74720	0.0181784	0.080405
262181_at	100.32	94.08	148.44	133.68	140.67	160.1	291	177.62		AT1G78060	0.629632	0.73211
261783_at	192.86	209.46	285.73	214.38	372.71	393.23	485.9	424.71		AT1G08190	0.928888	0.864588
261653_at	45.09	60.3	56.12	59.26	77.69	91.03	93.58	102.04		AT1G01900	0.678893	0.761661
261498_at	222.57	237.57	216.43	231.69	218.27	237.13	199.18	211.26		AT1G28440	-0.0149386	-0.126714
261399_at	23.38	22.71	28.31	27.5	44.78	42.4	82.6	56.54		AT1G79620	0.919543	1.31794
261363_at	244.12	202.81	288.51	271.75	396.24	514.75	564.17	429.74		AT1G41830	1.02739	0.827019
260645_at	79.86	77.54	58.46	60.96	81.03	81.11	77.12	78.15		AT1G53300	0.0428045	0.378735
260615_at	902.56	962.64	1123.42	1092.99	603.74	628.24	819.71	846.76		AT1G53240	-0.598351	-0.411429
260511_at	291.81	353.97	253.12	235.41	240.44	260.51	232.01	222.73		AT1G51570	-0.366376	-0.103405
260352_at	97.52	94.45	109.75	99.19	175.17	155.23	302.73	299.67		AT1G69295	0.783333	1.52763
259858_at	81.68	84.18	94.05	71.94	57.85	70.18	81.71	64.54		AT1G68400	-0.373484	-0.18266
259736_at	261.09	258.53	440.17	377.42	414.13	506.53	405.16	568.5		AT1G64390	0.825212	0.252041
259021_at	74.86	72.23	75.97	65.86	79.86	79.66	50.77	54.33		AT3G07540	0.117038	-0.4324
258938_at	129.11	104.73	121.54	118.45	115.96	113.38	78.78	128.43		AT3G10080	-0.0280337	-0.211881
258684_at	151.79	161.2	163.82	167.88	139.58	160.89	189.11	130.7		AT3G08680	-0.0588956	-0.052664
258368_at	342.94	374.41	199.59	234	193.43	220.99	197.55	140.55		AT3G14240	-0.791584	-0.358881
258286_at	105.26	104.47	127.95	128.53	139.52	152.32	205.95	144.93		AT3G16060	0.476644	0.452131
258159_at	83.27	89.59	148.31	113	90.79	71.93	103.92	145.72		AT3G17840	-0.0872125	-0.0659132
258040_at	108.08	118.01	195.2	174.16	198.88	192.31	348.07	239.49		AT3G21190	0.790972	0.669709
257949_at	99.59	96.51	271.03	229.26	150.5	99.24	253.23	269.72		AT3G21750	0.348837	0.0639084
257938_at	1120.07	1324.14	1017.69	967.85	840.29	919.62	1039.43	816.59		AT3G19820	-0.473867	-0.0973192
257789_at	323.25	317.83	446.57	461.2	375.35	361.74	387.64	398.55		AT3G27020	0.201336	-0.207449
257722_at	703.65	625.74	729.97	713.51	1189.6	1159.18	856.11	1115.13		AT3G18490	0.821147	0.449552
257510_at	210.25	224.21	266.37	262.99	159.4	170.7	171.59	210.2		AT1G55360	-0.39632	-0.47147
256997_at	282.53	283.48	371.67	385.35	672.3	652.73	691.09	871.98		AT3G14067	1.22713	1.04598
256960_at	83.05	79.26	128.17	118.18	56.2	53.51	53.6	58.75		AT3G13510	-0.565057	-1.13271
256034_at	400.08	427.46	565.15	383.17	624.66	565.55	655.23	785.33		AT1G07080	0.524315	0.603184
256022_at	233.07	226.38	260.43	211.65	1061.01	948.01	935.65	768.17		AT1G58360	2.12851	1.85167
255785_at	221.86	221.86	515.53	512.68	204.26	219.5	314.04	358.26		AT1G19920	-0.0664022	-0.612958
255674_at	1134.39	1141.77	1340.58	1321.07	1552.18	1570.46	1919.77	1518.39		AT4G00430	0.456164	0.369316
255638_at	144.85	147.16	115.26	116.1	133.19	156.7	153.16	159.66		AT4G00740	-0.0105122	0.435193
254341_at	64.14	85.36	73.26	75.01	86.34	83.95	110.04	103.03		AT4G22130	0.187848	0.523101
254209_at	23.04	32.72	52.41	48.78	40.01	49.6	59.12	53.95		AT4G23490	0.684429	0.160149
253698_at	113.52	141.21	129.05	122.05	139.84	128.41	160.5	147.31		AT4G29680	0.0746093	0.293778
253692_at	87.71	77.07	104.41	85.31	71.49	66.6	65.48	78.62		AT4G29720	-0.254932	-0.396801
253218_at	376.78	345.61	348.63	325.22	400.45	501.17	321.55	456.27		AT4G34980	0.319742	0.207009
253090_at	306.73	288.45	400.77	388.28	390.48	470.86	513.63	634.32		AT4G36360	0.533257	0.540871
253033_at	207.17	254.92	333.52	267.07	219.14	346.95	252.97	376.31		AT4G38220	0.292858	0.0673216
253006_at	329.2	439.06	437.99	460.41	592.92	473.6	643.59	545.56		AT4G38250	0.473244	0.404501
252954_at	158.78	178.62	263.08	233.81	107.77	112.38	144.04	163.45		AT4G38660	-0.615973	-0.692387
252033_at	402.84	424.26	418.55	442.14	305	398.39	443.25	427.91		AT3G51950	-0.233737	0.017444
251714_at	200.51	192.77	334.98	306.56	192.76	202.52	302.64	287.77		AT3G56370	0.00731814	-0.119822
251122_at	233.75	269.32	254.92	225.65	228.77	241.24	341.36	276.6		AT5G01020	-0.0980677	0.362767
251075_at	71.06	66.45	108.72	90.55	74.92	61.05	111.16	117.59		AT5G01890	-0.0162482	0.199047
250933_at	70.16	82.98	81.98	69.27	101.53	106.63	97.73	106.28		AT5G03170	0.442842	0.431705
250661_at	350.76	373.14	279.19	248.36	338.36	378.73	269.83	287.65		AT5G07030	-0.0136362	0.0796122
250600_at	34.53	36.49	37.07	47.72	45.42	51.1	41.09	37.06		AT5G07800	0.442603	-0.117648
250490_at	122.76	115.25	157.62	147.07	91.25	97.42	97.89	130.23		AT5G09760	-0.335157	-0.417549
250408_at	56.18	40	81.78	65.18	248.63	235.17	149.3	193.74		AT5G10930	2.3306	1.22295
250253_at	162.97	157.49	151.4	153.62	205.48	219.72	136.9	169.2		AT5G13640	0.407997	0.0050992
248764_at	130.22	130.13	337.11	317.57	401.35	304.31	518.4	924.66		AT5G47640	1.43852	1.14027
248419_at	635.24	662.97	438.66	450.3	333.67	388.74	285.29	258.85		AT5G51550	-0.845634	-0.708141
248249_at	140.14	153.48	138.74	122.62	175.62	178.08	208.2	172.66		AT5G53140	0.268576	0.543222
248095_at	329.86	340.07	229.19	212.68	270.89	323.06	260.11	199.77		AT5G55230	-0.173669	0.0576355
248085_at	83.5	97.94	107.68	97.82	66.82	91.56	97.02	72.48		AT5G55480	-0.196102	-0.277853
247638_at	50.87	48.34	50.23	58.28	48.09	42.61	44.56	45.28		AT5G60490	-0.129383	-0.272398
247589_at	117.42	121.14	186.1	164	119.36	89.59	139.86	132.1		AT5G60690	-0.191194	-0.364373
247404_at	321.72	332.4	385.82	379.05	256.69	260.23	355.72	401.87		AT5G62890	-0.339614	-0.0137973
247309_at	80.5	79.76	145.33	143.53	99.18	73.87	115.17	180.9		AT5G63940	0.110775	0.0355679
247153_at	180.46	228.58	249.97	242.26	135.1	127.72	157.83	179.14		AT5G65700	-0.638167	-0.546712
247048_at	69.1	61.63	47.02	43.85	65.66	92.17	51.56	56.72		AT5G66560	0.271781	0.252891
247031_at	32.39	30.94	48	50.75	54.35	48.8	52.88	67.47		AT5G67230	0.703783	0.285383
246990_at	302.49	318.6	315.2	309.63	419.56	432.08	549.46	508.66		AT5G67360	0.455441	0.759968
246849_at	174.83	159.65	143.55	137.91	147.99	130.88	89.84	142.45		AT5G26850	-0.262327	-0.277003
246800_at	190.58	172.76	208.22	204.75	169.65	203.06	250.48	199.23		AT5G26780	0.0367333	0.122958
246763_at	221.57	248.14	432.79	439.97	362.96	344.2	572.3	417.41		AT5G27150	0.590266	0.181421
246591_at	94.04	87.3	135.87	120.7	128.74	138.65	112.21	140.32		AT5G14880	0.560248	-0.0228977
246516_at	53.5	60.75	74.3	68.65	110.89	102.45	187.01	159.41		AT5G15740	0.90096	1.27701
246483_at	145.19	144.98	96.78	92.37	105.01	146.67	123.04	87.39		AT5G16000	-0.205308	0.15381
245803_at	1178.39	1322.99	1429.48	1520.2	1688.55	1763.69	1809.67	1679.83		AT1G47128	0.464809	0.242462
245748_at	64.34	51.61	170.24	153.76	324.88	248.48	281.27	421.81		AT1G51140	2.30594	1.1177
245492_at	102.47	89.46	120.08	112.54	91.15	100.5	130.87	103.36		AT4G16340	-0.00210623	0.00995073

## Sheet: salt_root
ID	Control-Roots-6.0h_Rep1	Control-Roots-6.0h_Rep2	Control-Roots-12.0h_Rep1	Control-Roots-12.0h_Rep2	Saltstress-Roots-6.0h_Rep1	Saltstress-Roots-6.0h_Rep2	Saltstress-Roots-12.0h_Rep1	Saltstress-Roots-12.0h_Rep2		ID	6h_Root_Salt/CK	12h_Root_Salt/CK
267619_at	150.32	139.02	176.44	186.36	81.53	83.05	54.29	146.9		AT2G26730	-0.813977	-0.850616
267316_at	124.34	108.21	149.95	150.25	56.1	60.64	63.16	123.59		AT2G34710	-0.994242	-0.684816
266927_at	1096.08	1634.24	1331.62	1338.12	943.85	915.26	1341.68	1671.57		AT2G45960	-0.554458	0.174621
266314_at	172.3	156.66	203.64	165.64	238.79	180.83	161.69	159.63		AT2G27040	0.351171	-0.200704
266254_at	103.07	96.57	127.44	133.49	74.34	83.03	70.45	75.59		AT2G27810	-0.34324	-0.837299
266022_at	550.43	546.71	739.23	658.74	179.9	117.41	219.71	466.95		AT2G05920	-1.88371	-1.02567
265377_at	665.12	521.86	637.95	650.34	422.1	449.68	294.97	283.93		AT2G05790	-0.44526	-1.15407
264315_at	266.19	257.9	413.18	380.06	149.03	91.85	74.28	254.82		AT1G70370	-1.1215	-1.26923
264147_at	2.12	1.51	0.53	5.91	0.62	2.53	5.17	85.09		AT1G02205.1	-0.204618	3.80895
264146_at	2.15	2.39	7.96	1.19	24.87	24.62	21.77	189.43		AT1G02205.2	3.44637	4.52869
263942_at	76.36	88.81	80.21	133.1	24.54	31.92	53.87	69.63		AT2G35860	-1.54865	-0.788441
263629_at	12.57	19.13	18.97	16.24	7.63	6.16	14.39	27.91		AT2G04850	-1.20086	0.264672
263590_at	212.55	185.98	248.48	246.46	232.07	247.54	228.51	218.29		AT2G01820	0.267173	-0.147624
263326_at	390.41	451.28	411.25	449.72	144.83	134.28	103.58	251.15		AT2G04280	-1.59246	-1.27924
262850_at	184.16	156.96	128.48	166.76	164.87	154.79	88.02	108.73		AT1G14920	-0.0937411	-0.585525
262806_at	631.24	663.32	985.31	897.66	376.43	337.46	228.66	363.91		AT1G20950	-0.858688	-1.66795
262230_at	187.22	239.01	186.39	196.52	109.41	83.01	39.14	93.05		AT1G68560	-1.14737	-1.53439
262209_at	88.73	80.41	120.46	117.92	38.77	30.63	28.39	82.02		AT1G74720	-1.28521	-1.11039
262181_at	138.87	139.79	262.31	238.09	158.33	83.86	141.26	273.07		AT1G78060	-0.202367	-0.272302
261783_at	199.08	178.21	205.07	234.25	183.57	192.77	229.04	317.75		AT1G08190	-0.00363723	0.315715
261653_at	0.82	9.87	6.1	6.99	8.53	1.05	8.25	89.45		AT1G01900	-0.158164	2.89989
261498_at	256.6	242.64	293.68	274.05	145.95	126.79	142.36	209.87		AT1G28440	-0.872207	-0.688687
261399_at	27.59	33.28	33.02	25.92	14.26	14.47	11.19	43.05		AT1G79620	-1.08317	-0.11989
261363_at	434.75	465.85	503.64	548.07	230.63	202.32	182.32	377.13		AT1G41830	-1.05669	-0.910656
260645_at	76.44	72.09	103.31	98.92	121.55	131.96	105.58	70.26		AT1G53300	0.771288	-0.201734
260615_at	886.71	798.31	934.09	958.68	320.03	316.8	364.47	557.15		AT1G53240	-1.40379	-1.03826
260511_at	139.35	139.22	170.44	142.66	63.96	84.05	75.83	113.64		AT1G51570	-0.912345	-0.724654
260352_at	96.2	100.12	149.59	141.37	193.06	175.64	195.54	384.22		AT1G69295	0.90924	0.994635
259858_at	75.02	58.91	78.85	76.49	63.87	61.53	54.9	61.92		AT1G68400	-0.0949418	-0.411142
259736_at	449.52	328.49	649.81	610.89	492.09	295.31	185.1	281.75		AT1G64390	0.017308	-1.43319
259021_at	93.83	61.49	97.06	61.77	24.89	35.39	39.94	68.48		AT3G07540	-1.36549	-0.550853
258938_at	38.92	42.37	62.62	49.95	20.39	12.59	13.67	47.7		AT3G10080	-1.30149	-0.875217
258684_at	168.56	163.12	209.47	193.36	121.65	108.3	98.29	95.9		AT3G08680	-0.528472	-1.0527
258368_at	182.12	173.54	173.21	188.98	62.64	82.46	79.38	117.39		AT3G14240	-1.29345	-0.880236
258286_at	156.39	163.09	159.88	192.39	70.06	69.17	69.69	116.4		AT3G16060	-1.19826	-0.920681
258159_at	86.84	61.83	105.1	103	59.68	66.83	40.55	53.19		AT3G17840	-0.232862	-1.15054
258040_at	210.8	204.28	272.86	268.82	74.73	73.29	67.13	188.99		AT3G21190	-1.4876	-1.08062
257949_at	19.29	17.32	32.94	19	29.55	19.81	29.76	53.84		AT3G21750	0.431105	0.686657
257938_at	1886.8	1780.95	2202.17	2415.81	457.4	597.22	446.72	1130.04		AT3G19820	-1.79817	-1.5503
257789_at	194.46	202.02	221.91	227.88	88.27	94.66	127.44	256.09		AT3G27020	-1.11596	-0.229912
257722_at	175.74	134.5	237.72	202.43	126.78	110.84	158.02	337.02		AT3G18490	-0.384728	0.16955
257510_at	159.26	165.27	168.98	165.31	66.26	65.76	57.59	89.13		AT1G55360	-1.2976	-1.18803
256997_at	174.66	195.31	182.28	214.87	117.79	92.51	144.64	499.31		AT3G14067	-0.814959	0.697265
256960_at	45.14	45.76	74.82	68.54	31.1	29.28	37.15	50.32		AT3G13510	-0.59021	-0.712782
256034_at	374.25	371.28	395.93	359.04	296.44	276.84	301.46	503.45		AT1G07080	-0.379026	0.0924082
256022_at	100.51	75.81	165.29	171.5	401.11	368	520.39	704.25		AT1G58360	2.12499	1.86244
255785_at	149.38	171	173.91	180.4	110.16	88.4	105.87	119.02		AT1G19920	-0.690209	-0.655793
255674_at	334.65	297.44	513.58	517.74	391.22	315.12	655.04	1360.39		AT4G00430	0.160233	0.966596
255638_at	220.39	200.91	184.28	214.38	42.25	50.34	60.35	102.71		AT4G00740	-2.18592	-1.28976
254341_at	199.5	184.95	251.36	269.31	284.59	220.25	151.84	132.56		AT4G22130	0.39303	-0.872448
254209_at	43.93	59.01	69.86	81.66	20.1	16.49	23.04	64.58		AT4G23490	-1.49228	-0.790176
253698_at	220.64	259.57	256.2	288.13	80.38	88.19	83.65	181.38		AT4G29680	-1.51032	-1.03833
253692_at	89.58	68.88	111.36	89.22	46.96	53.57	31.06	53.14		AT4G29720	-0.656493	-1.25229
253218_at	172.94	193.27	219.94	232.29	42.59	42.44	43.14	157.7		AT4G34980	-2.10663	-1.17101
253090_at	217.12	216.96	339.72	341.36	124.47	122.85	134.61	444.76		AT4G36360	-0.811582	-0.233339
253033_at	301.88	294.17	333.02	333.62	120.56	119.5	158.87	329.18		AT4G38220	-1.31204	-0.449879
253006_at	194.65	293.39	228.52	200.25	230.59	244.42	359.94	342.78		AT4G38250	-0.0390415	0.712746
252954_at	200.7	214.43	264.83	253.5	65.31	100.68	63.31	113.7		AT4G38660	-1.32247	-1.55004
252033_at	482.5	401.47	492.79	420.37	293.39	279.37	300.2	383.93		AT3G51950	-0.626067	-0.416597
251714_at	238.87	223.13	342.27	360.1	152.57	173.37	77.79	171.86		AT3G56370	-0.503286	-1.49232
251122_at	287.8	346.6	315.84	303.33	160.57	164.32	148.18	210.8		AT5G01020	-0.965441	-0.786432
251075_at	137.13	139.13	191.72	192.73	67.48	61.82	51.37	141.76		AT5G01890	-1.0953	-0.993224
250933_at	55.44	63.19	74.71	40.05	47.24	33.35	66.15	84.1		AT5G03170	-0.557796	0.388745
250661_at	378	243.87	449.31	425.26	129.41	84.49	76.94	558.67		AT5G07030	-1.53968	-0.460432
250600_at	14.59	26.62	20.69	22.63	11.71	14.72	10.77	31.06		AT5G07800	-0.640818	-0.0504952
250490_at	150.57	156.28	141.79	137.57	76.96	82.65	55.06	136.92		AT5G09760	-0.942983	-0.541169
250408_at	47.32	50.97	43.44	39.31	76.04	66.01	68.2	122.48		AT5G10930	0.531282	1.20432
250253_at	115.51	136.3	128.77	125.53	72.15	82.16	85.84	125.41		AT5G13640	-0.706504	-0.26758
248764_at	43.05	46.9	53.77	44.85	311.77	254.35	196.9	132.83		AT5G47640	2.65391	1.74133
248419_at	294.29	260.88	332.78	336.44	59.97	40.32	52.87	154.79		AT5G51550	-2.46875	-1.68826
248249_at	136.62	143.26	145.42	144.7	92.15	96.53	104	115.17		AT5G53140	-0.568867	-0.404599
248095_at	152.05	136.75	153.86	143.98	96.59	101.16	105.26	107.9		AT5G55230	-0.546393	-0.482601
248085_at	151.67	145.12	189.08	179.99	88.13	93.29	65.85	104.74		AT5G55480	-0.710109	-1.11336
247638_at	44.47	45.8	39.66	40.25	25.11	14.67	23.91	39.12		AT5G60490	-1.1822	-0.342337
247589_at	234.46	217.07	262.4	263.24	207.07	175.41	140.21	177.64		AT5G60690	-0.239438	-0.725729
247404_at	469.22	409.47	431.32	452.17	218.09	268.46	249.51	373.63		AT5G62890	-0.852766	-0.503657
247309_at	215.2	202.34	216.36	208.57	170.95	173.7	123.22	124.1		AT5G63940	-0.276782	-0.780846
247153_at	344.88	321.46	392.39	408.06	262.44	268.18	237.7	286.23		AT5G65700	-0.328579	-0.611437
247048_at	85.26	70.1	77.89	87.77	36.47	40.7	24.64	48.65		AT5G66560	-1.0095	-1.17654
247031_at	13.93	12.57	16	15.19	54.61	60.49	16.11	22.66		AT5G67230	2.11882	0.313857
246990_at	204.37	203.93	266.6	262.19	87.91	77.01	127.54	417.25		AT5G67360	-1.30786	0.0430053
246849_at	249.58	211.86	221.82	250.77	112.58	149.66	87.87	134.43		AT5G26850	-0.815255	-1.08808
246800_at	206.26	252.71	270.56	279.64	90.56	100.72	103.4	170.18		AT5G26780	-1.26271	-1.00799
246763_at	242.6	261.91	217.6	213.88	216.07	240.93	254.02	329.7		AT5G27150	-0.142689	0.435983
246591_at	125.07	153.82	97.78	100.2	39.88	54.18	43.57	77.9		AT5G14880	-1.56804	-0.704755
246516_at	55.68	64.89	72.19	70.12	58.91	50.84	54.05	59.9		AT5G15740	-0.13565	-0.320636
246483_at	138.24	121.55	141.54	141.33	114.16	130.92	71.48	73.63		AT5G16000	-0.0840931	-0.962992
245803_at	1131.5	1206.59	1183.28	1152.84	816.7	813.87	1544.26	2830.27		AT1G47128	-0.519954	0.905014
245748_at	46.64	60.44	65.86	59.63	229.73	203.08	220.15	361.8		AT1G51140	2.01504	2.21332
245492_at	104.22	122.42	173.83	146.31	64.78	70.22	51.13	114.19		AT4G16340	-0.747443	-0.953442

## Sheet: osmotic_shoot
ID	Control-Shoots-6.0h_Rep1	Control-Shoots-6.0h_Rep2	Control-Shoots-12.0h_Rep1	Control-Shoots-12.0h_Rep2	Osmoticstress-Shoots-6.0h_Rep1	Osmoticstress-Shoots-6.0h_Rep2	Osmoticstress-Shoots-12.0h_Rep1	Osmoticstress-Shoots-12.0h_Rep2		ID	6h_Shoot_Osmotic/CK	12h_Shoot_Osmotic/CK
267619_at	170.34	175	169.97	166.85	87.98	101.29	66.51	60.87		AT2G26730	-0.867572	-1.40284
267316_at	87.13	72.93	100.06	103.49	61.6	65.71	57	51.85		AT2G34710	-0.330267	-0.903042
266927_at	2017.66	1761.41	2254.76	2151.5	1470.09	1288.84	1012.63	1184.22		AT2G45960	-0.453922	-1.00412
266314_at	168.6	164.69	207.9	186.5	73.67	77.4	87.36	81.88		AT2G27040	-1.14156	-1.22059
266254_at	184	195.56	203.54	152.79	111.06	97.46	73.24	61.49		AT2G27810	-0.864142	-1.40314
266022_at	386.6	410.68	538.41	519.36	246.27	299.79	361.85	318.23		AT2G05920	-0.546027	-0.63725
265377_at	939.99	862.14	848.03	753.22	208.39	202.63	148.85	120.21		AT2G05790	-2.13242	-2.5732
264315_at	718.04	675	1020.4	1055.69	326.93	297.98	205.76	241.02		AT1G70370	-1.15652	-2.21623
264147_at	101.95	84.81	152.27	92	513.48	482.71	473.39	332.13		AT1G02205.1	2.41524	1.72144
264146_at	225.23	184.43	344	212.56	911.1	1016.62	857.13	731.59		AT1G02205.2	2.2344	1.51326
263942_at	81.23	86.15	108.58	114.16	28.94	35.1	65.53	38.66		AT2G35860	-1.38608	-1.09614
263629_at	26.79	20.62	36.92	38.17	54.22	68.32	71.13	66.69		AT2G04850	1.36999	0.876093
263590_at	263.22	269.47	239.55	234.86	296.44	270.01	283.28	246.04		AT2G01820	0.0886524	0.158006
263326_at	406.8	443.23	360.47	339.65	166.4	221.03	273.93	232.85		AT2G04280	-1.13358	-0.466243
262850_at	313.68	304.62	228.21	235.91	188.26	155.39	173.61	154.07		AT1G14920	-0.847367	-0.50221
262806_at	232.97	221.46	321.86	306.53	82.03	106.75	120.31	139.55		AT1G20950	-1.26735	-1.27393
262230_at	480.44	483.97	312.22	339.48	181.31	185.55	147.67	109.21		AT1G68560	-1.39442	-1.34311
262209_at	83.59	108.05	113.96	126.99	77.23	74.94	90.73	85.48		AT1G74720	-0.332715	-0.451438
262181_at	100.32	94.08	148.44	133.68	79.61	76.28	90.87	71.6		AT1G78060	-0.3185	-0.796136
261783_at	192.86	209.46	285.73	214.38	315	330.09	383.99	337.5		AT1G08190	0.681157	0.528734
261653_at	45.09	60.3	56.12	59.26	73.24	93.4	82.11	67.55		AT1G01900	0.660997	0.375296
261498_at	222.57	237.57	216.43	231.69	124.15	159.36	142.8	129.16		AT1G28440	-0.698673	-0.720491
261399_at	23.38	22.71	28.31	27.5	24.63	36.86	36.47	34.09		AT1G79620	0.415898	0.338327
261363_at	244.12	202.81	288.51	271.75	197.47	193.22	265.68	170.62		AT1G41830	-0.194025	-0.360776
260645_at	79.86	77.54	58.46	60.96	40.48	45.9	37	37.8		AT1G53300	-0.865666	-0.674934
260615_at	902.56	962.64	1123.42	1092.99	317.79	422.76	345.85	404.09		AT1G53240	-1.33266	-1.56338
260511_at	291.81	353.97	253.12	235.41	175.51	148.75	152.48	159.55		AT1G51570	-0.993892	-0.646762
260352_at	97.52	94.45	109.75	99.19	198.36	247.66	597.62	519.5		AT1G69295	1.21623	2.41862
259858_at	81.68	84.18	94.05	71.94	34.5	32.17	41.32	37.21		AT1G68400	-1.31486	-1.07978
259736_at	261.09	258.53	440.17	377.42	132.12	110.45	180.73	115.52		AT1G64390	-1.09906	-1.46456
259021_at	74.86	72.23	75.97	65.86	23.26	23.37	25.76	21.12		AT3G07540	-1.65737	-1.59712
258938_at	129.11	104.73	121.54	118.45	75.25	81.63	64.31	62.72		AT3G10080	-0.57586	-0.917805
258684_at	151.79	161.2	163.82	167.88	52.8	59.32	48.19	61.75		AT3G08680	-1.48107	-1.59316
258368_at	342.94	374.41	199.59	234	121.7	107.19	71.05	58.81		AT3G14240	-1.64802	-1.73937
258286_at	105.26	104.47	127.95	128.53	84.91	97.53	103.17	84.62		AT3G16060	-0.201111	-0.449726
258159_at	83.27	89.59	148.31	113	34.33	35.69	32.26	47.03		AT3G17840	-1.30377	-1.72055
258040_at	108.08	118.01	195.2	174.16	64.48	79.56	108.28	96.15		AT3G21190	-0.650428	-0.853421
257949_at	99.59	96.51	271.03	229.26	217.33	249.43	347.31	409.87		AT3G21750	1.25109	0.597872
257938_at	1120.07	1324.14	1017.69	967.85	427.26	289.01	299.42	262.15		AT3G19820	-1.77079	-1.82199
257789_at	323.25	317.83	446.57	461.2	668.42	588.11	608.47	639.25		AT3G27020	0.970869	0.458896
257722_at	703.65	625.74	729.97	713.51	1132.72	1391.95	741.89	670.94		AT3G18490	0.92533	-0.0309632
257510_at	210.25	224.21	266.37	262.99	153.19	107.88	168.92	116.18		AT1G55360	-0.734787	-0.892781
256997_at	282.53	283.48	371.67	385.35	2018.04	1646.04	1441.82	1281.53		AT3G14067	2.69455	1.84698
256960_at	83.05	79.26	128.17	118.18	43.98	30.63	35.33	33.93		AT3G13510	-1.12131	-1.83062
256034_at	400.08	427.46	565.15	383.17	816.61	807.16	874.12	770.78		AT1G07080	0.972446	0.794554
256022_at	233.07	226.38	260.43	211.65	991.11	1057.79	1632.05	1534.81		AT1G58360	2.15687	2.74595
255785_at	221.86	221.86	515.53	512.68	105.7	113.68	175.07	177.68		AT1G19920	-1.01622	-1.54342
255674_at	1134.39	1141.77	1340.58	1321.07	1410.66	1428.47	2068.13	2285.39		AT4G00430	0.318847	0.709861
255638_at	144.85	147.16	115.26	116.1	103.94	113.69	132.55	111.53		AT4G00740	-0.42414	0.0772146
254341_at	64.14	85.36	73.26	75.01	41.63	41.71	46.25	42.4		AT4G22130	-0.843064	-0.742034
254209_at	23.04	32.72	52.41	48.78	24.23	19.16	18.13	33.72		AT4G23490	-0.361868	-0.964651
253698_at	113.52	141.21	129.05	122.05	128.34	151.12	131.71	130.3		AT4G29680	0.133673	0.0613598
253692_at	87.71	77.07	104.41	85.31	52.93	53.59	52.99	36.42		AT4G29720	-0.629417	-1.08536
253218_at	376.78	345.61	348.63	325.22	360.94	447.05	407.02	266.37		AT4G34980	0.16156	-0.000985184
253090_at	306.73	288.45	400.77	388.28	254.44	208.46	369.21	301.35		AT4G36360	-0.362625	-0.23475
253033_at	207.17	254.92	333.52	267.07	249.74	255.72	297.48	302		AT4G38220	0.129423	-0.00266883
253006_at	329.2	439.06	437.99	460.41	491.71	459.61	465.96	567.15		AT4G38250	0.308336	0.201564
252954_at	158.78	178.62	263.08	233.81	31.3	28.63	14.03	27.87		AT4G38660	-2.49311	-3.5679
252033_at	402.84	424.26	418.55	442.14	294.92	284.69	339.56	294.93		AT3G51950	-0.512979	-0.439896
251714_at	200.51	192.77	334.98	306.56	71.95	55.27	82.23	69.05		AT3G56370	-1.62823	-2.08432
251122_at	233.75	269.32	254.92	225.65	182.21	184.69	212.81	183.51		AT5G01020	-0.455372	-0.278081
251075_at	71.06	66.45	108.72	90.55	28.39	32.8	52.88	67.07		AT5G01890	-1.16817	-0.732291
250933_at	70.16	82.98	81.98	69.27	72.34	89.96	111.43	68.44		AT5G03170	0.0838118	0.250019
250661_at	350.76	373.14	279.19	248.36	162.73	202.06	142.55	101.7		AT5G07030	-0.988724	-1.11095
250600_at	34.53	36.49	37.07	47.72	30.8	32.28	35.76	37.94		AT5G07800	-0.171043	-0.20223
250490_at	122.76	115.25	157.62	147.07	77.31	57.92	65.41	68.66		AT5G09760	-0.815607	-1.18436
250408_at	56.18	40	81.78	65.18	311.49	422.42	430.08	358.22		AT5G10930	2.93179	2.42332
250253_at	162.97	157.49	151.4	153.62	269.76	232.83	207.09	155.51		AT5G13640	0.649238	0.249475
248764_at	130.22	130.13	337.11	317.57	536.82	436.66	630.27	566.77		AT5G47640	1.9027	0.87061
248419_at	635.24	662.97	438.66	450.3	136.76	130.99	115.68	75.45		AT5G51550	-2.27757	-2.21756
248249_at	140.14	153.48	138.74	122.62	102.47	98.77	136.24	139.46		AT5G53140	-0.545033	0.0770609
248095_at	329.86	340.07	229.19	212.68	128.9	150.83	101.15	94.64		AT5G55230	-1.25998	-1.17431
248085_at	83.5	97.94	107.68	97.82	20.23	9.64	13.44	16.14		AT5G55480	-2.60272	-2.79644
247638_at	50.87	48.34	50.23	58.28	23.27	31.43	32.14	32.46		AT5G60490	-0.858945	-0.748222
247589_at	117.42	121.14	186.1	164	62.45	67.18	71.18	76.59		AT5G60690	-0.879953	-1.24441
247404_at	321.72	332.4	385.82	379.05	169.71	162.51	192.96	171.99		AT5G62890	-0.977416	-1.06752
247309_at	80.5	79.76	145.33	143.53	72.92	86.98	95.49	83.59		AT5G63940	-0.00324444	-0.689766
247153_at	180.46	228.58	249.97	242.26	97.38	92.99	82.8	100.37		AT5G65700	-1.10344	-1.42615
247048_at	69.1	61.63	47.02	43.85	38.36	26.28	25.43	22.12		AT5G66560	-1.01609	-0.934359
247031_at	32.39	30.94	48	50.75	35.67	27.14	45.04	50.44		AT5G67230	-0.0118948	-0.0485822
246990_at	302.49	318.6	315.2	309.63	460.26	472.26	668.68	554.07		AT5G67360	0.586332	0.968594
246849_at	174.83	159.65	143.55	137.91	113.04	89.62	91.13	87.78		AT5G26850	-0.722859	-0.653696
246800_at	190.58	172.76	208.22	204.75	114.07	137.84	112.71	131.18		AT5G26780	-0.528412	-0.759806
246763_at	221.57	248.14	432.79	439.97	343.4	326.12	758.22	714.41		AT5G27150	0.511357	0.754738
246591_at	94.04	87.3	135.87	120.7	84.61	98.06	86.34	97.87		AT5G14880	0.0105425	-0.478001
246516_at	53.5	60.75	74.3	68.65	22.51	34.34	146.31	82.93		AT5G15740	-1.00696	0.681348
246483_at	145.19	144.98	96.78	92.37	53.17	74.5	42.44	40.84		AT5G16000	-1.18448	-1.18349
245803_at	1178.39	1322.99	1429.48	1520.2	2594.98	2692.39	2464.32	2488.72		AT1G47128	1.07983	0.747756
245748_at	64.34	51.61	170.24	153.76	440.61	489.63	646.44	509.95		AT1G51140	3.0041	1.83556
245492_at	102.47	89.46	120.08	112.54	44.34	48.74	53.72	54.88		AT4G16340	-1.04404	-1.09895

## Sheet: osmotic_root
ID	Control-Roots-6.0h_Rep1	Control-Roots-6.0h_Rep2	Control-Roots-12.0h_Rep1	Control-Roots-12.0h_Rep2	Osmoticstress-Roots-6.0h_Rep1	Osmoticstress-Roots-6.0h_Rep2	Osmoticstress-Roots-12.0h_Rep1	Osmoticstress-Roots-12.0h_Rep2		ID	6h_Root_Osmotic/CK	12h_Root_Osmotic/CK
267619_at	150.32	139.02	176.44	186.36	117.72	85.68	113.85	76.19		AT2G26730	-0.508446	-0.932871
267316_at	124.34	108.21	149.95	150.25	120.37	106.83	114.72	106.87		AT2G34710	-0.0335781	-0.438031
266927_at	1096.08	1634.24	1331.62	1338.12	2080.41	1763.48	2246.94	2290.03		AT2G45960	0.493497	0.76503
266314_at	172.3	156.66	203.64	165.64	177.97	143.21	178.57	147.23		AT2G27040	-0.0345301	-0.180729
266254_at	103.07	96.57	127.44	133.49	78.28	69.22	75.19	68.46		AT2G27810	-0.436686	-0.861105
266022_at	550.43	546.71	739.23	658.74	325.56	261.29	376.71	329.92		AT2G05920	-0.902684	-0.984306
265377_at	665.12	521.86	637.95	650.34	316.92	404.82	305.49	285.08		AT2G05790	-0.717745	-1.12528
264315_at	266.19	257.9	413.18	380.06	167.13	162.43	140.19	112.96		AT1G70370	-0.669273	-1.64776
264147_at	2.12	1.51	0.53	5.91	30.26	27.92	30.37	27.48		AT1G02205.1	4.00248	3.16718
264146_at	2.15	2.39	7.96	1.19	94.47	69.08	77.6	41.43		AT1G02205.2	5.1709	3.70141
263942_at	76.36	88.81	80.21	133.1	22.56	45.96	78.77	37.23		AT2G35860	-1.26935	-0.878827
263629_at	12.57	19.13	18.97	16.24	2.67	14.95	10.26	9.9		AT2G04850	-0.847269	-0.80449
263590_at	212.55	185.98	248.48	246.46	166.42	168.4	156.89	160.27		AT2G01820	-0.251303	-0.642043
263326_at	390.41	451.28	411.25	449.72	220.6	181.55	204.83	160.77		AT2G04280	-1.06556	-1.2357
262850_at	184.16	156.96	128.48	166.76	142.03	212.19	171.1	139.65		AT1G14920	0.0543663	0.0738662
262806_at	631.24	663.32	985.31	897.66	314.91	308.2	338.03	270.32		AT1G20950	-1.0549	-1.63004
262230_at	187.22	239.01	186.39	196.52	69.33	90.11	71.63	51.26		AT1G68560	-1.41862	-1.63964
262209_at	88.73	80.41	120.46	117.92	76.98	59.14	68.6	66.09		AT1G74720	-0.313339	-0.82362
262181_at	138.87	139.79	262.31	238.09	144.62	104.98	186.12	148.01		AT1G78060	-0.158888	-0.582672
261783_at	199.08	178.21	205.07	234.25	265.89	263.23	275.16	246.71		AT1G08190	0.487921	0.248418
261653_at	0.82	9.87	6.1	6.99	20.89	13.47	11.47	23.45		AT1G01900	1.68447	1.41559
261498_at	256.6	242.64	293.68	274.05	209.11	157.48	174.62	176.08		AT1G28440	-0.445566	-0.694968
261399_at	27.59	33.28	33.02	25.92	26.18	28.34	21.4	24.98		AT1G79620	-0.158946	-0.345744
261363_at	434.75	465.85	503.64	548.07	189.81	221.81	220.32	171.06		AT1G41830	-1.12957	-1.4261
260645_at	76.44	72.09	103.31	98.92	40.19	41.6	43.21	41.06		AT1G53300	-0.860758	-1.26291
260615_at	886.71	798.31	934.09	958.68	437.59	511.31	564.74	418.63		AT1G53240	-0.828438	-0.944693
260511_at	139.35	139.22	170.44	142.66	113.61	118.99	114.05	120.19		AT1G51570	-0.260189	-0.418636
260352_at	96.2	100.12	149.59	141.37	295.16	251.31	331.3	291.35		AT1G69295	1.47694	1.0976
259858_at	75.02	58.91	78.85	76.49	52.95	29.4	49.88	42.17		AT1G68400	-0.701639	-0.75494
259736_at	449.52	328.49	649.81	610.89	200.43	125.89	128.19	106.54		AT1G64390	-1.2535	-2.42515
259021_at	93.83	61.49	97.06	61.77	78.76	49.31	63.25	51.23		AT3G07540	-0.278311	-0.472388
258938_at	38.92	42.37	62.62	49.95	25.21	24.55	30.23	29.64		AT3G10080	-0.708091	-0.910917
258684_at	168.56	163.12	209.47	193.36	95.8	88.55	92.12	91.72		AT3G08680	-0.847345	-1.13172
258368_at	182.12	173.54	173.21	188.98	149.88	124.85	123.83	124.66		AT3G14240	-0.372484	-0.543559
258286_at	156.39	163.09	159.88	192.39	121.49	115.52	105.46	99.13		AT3G16060	-0.430778	-0.783946
258159_at	86.84	61.83	105.1	103	49.17	50.52	47.1	51.17		AT3G17840	-0.576593	-1.08245
258040_at	210.8	204.28	272.86	268.82	106.48	108.36	142.65	118.18		AT3G21190	-0.950127	-1.05433
257949_at	19.29	17.32	32.94	19	59.1	55.18	55.87	51.72		AT3G21750	1.64226	1.05063
257938_at	1886.8	1780.95	2202.17	2415.81	919.04	1077.27	1140.27	1128.13		AT3G19820	-0.87756	-1.02559
257789_at	194.46	202.02	221.91	227.88	258.76	259.55	235.01	242.4		AT3G27020	0.386567	0.0859772
257722_at	175.74	134.5	237.72	202.43	353.77	277.22	308.07	271.09		AT3G18490	1.02423	0.395967
257510_at	159.26	165.27	168.98	165.31	78.81	81.28	85.39	78.72		AT1G55360	-1.01947	-1.02644
256997_at	174.66	195.31	182.28	214.87	488.03	343.16	450.18	316.35		AT3G14067	1.16777	0.948658
256960_at	45.14	45.76	74.82	68.54	34.47	35.97	34.14	44.39		AT3G13510	-0.367885	-0.868327
256034_at	374.25	371.28	395.93	359.04	553.7	440.06	421.49	440.29		AT1G07080	0.414631	0.1909
256022_at	100.51	75.81	165.29	171.5	431.83	371.3	599.96	471.44		AT1G58360	2.18744	1.66958
255785_at	149.38	171	173.91	180.4	99.11	101.94	125.35	100.5		AT1G19920	-0.67223	-0.649647
255674_at	334.65	297.44	513.58	517.74	808.74	692.42	953.33	923.16		AT4G00430	1.24788	0.863545
255638_at	220.39	200.91	184.28	214.38	104.74	122.86	132.95	110.12		AT4G00740	-0.888347	-0.713787
254341_at	199.5	184.95	251.36	269.31	109.1	100.17	101.52	104.39		AT4G22130	-0.87743	-1.33836
254209_at	43.93	59.01	69.86	81.66	42.18	34.59	48.29	44.09		AT4G23490	-0.423189	-0.713856
253698_at	220.64	259.57	256.2	288.13	161.34	142.31	163.57	136.16		AT4G29680	-0.661256	-0.860818
253692_at	89.58	68.88	111.36	89.22	50.78	40.4	64.3	54.7		AT4G29720	-0.797329	-0.753216
253218_at	172.94	193.27	219.94	232.29	100.82	94.38	89.83	72.26		AT4G34980	-0.907718	-1.48026
253090_at	217.12	216.96	339.72	341.36	327.69	232.86	251.94	233.87		AT4G36360	0.368882	-0.487432
253033_at	301.88	294.17	333.02	333.62	244.3	252.58	302.15	276.82		AT4G38220	-0.262536	-0.203419
253006_at	194.65	293.39	228.52	200.25	281.53	231.92	296.15	312.77		AT4G38250	0.0732244	0.506049
252954_at	200.7	214.43	264.83	253.5	72.07	88.32	58.91	53.29		AT4G38660	-1.37198	-2.2078
252033_at	482.5	401.47	492.79	420.37	278.07	208.48	350.1	289.59		AT3G51950	-0.861409	-0.513495
251714_at	238.87	223.13	342.27	360.1	151.36	152.39	142.94	124.69		AT3G56370	-0.605008	-1.39199
251122_at	287.8	346.6	315.84	303.33	200.84	251.21	232.12	245.38		AT5G01020	-0.48891	-0.374835
251075_at	137.13	139.13	191.72	192.73	105.4	113.6	141.46	92.74		AT5G01890	-0.335096	-0.715055
250933_at	55.44	63.19	74.71	40.05	47	41.09	59.46	67.05		AT5G03170	-0.429419	0.140632
250661_at	378	243.87	449.31	425.26	210.63	149.94	155.3	130.23		AT5G07030	-0.786334	-1.61493
250600_at	14.59	26.62	20.69	22.63	29.49	17.99	17.87	17.83		AT5G07800	0.204325	-0.279109
250490_at	150.57	156.28	141.79	137.57	83.78	67.85	83.79	69.49		AT5G09760	-1.01698	-0.865956
250408_at	47.32	50.97	43.44	39.31	126.35	106.63	72.85	79.22		AT5G10930	1.24509	0.877904
250253_at	115.51	136.3	128.77	125.53	131.1	114.81	111.27	106.86		AT5G13640	-0.0342052	-0.221343
248764_at	43.05	46.9	53.77	44.85	115.6	108.23	109.81	116.77		AT5G47640	1.31521	1.20007
248419_at	294.29	260.88	332.78	336.44	120.06	106.42	98.8	130.42		AT5G51550	-1.29355	-1.54575
248249_at	136.62	143.26	145.42	144.7	103.51	87.69	106.35	93.64		AT5G53140	-0.549726	-0.536722
248095_at	152.05	136.75	153.86	143.98	97.86	112.78	103.18	106.52		AT5G55230	-0.455291	-0.506211
248085_at	151.67	145.12	189.08	179.99	70.04	111	73.62	91.33		AT5G55480	-0.713134	-1.16187
247638_at	44.47	45.8	39.66	40.25	31.93	21.86	30.9	37.23		AT5G60490	-0.746909	-0.230086
247589_at	234.46	217.07	262.4	263.24	163.08	136.79	178.35	213.16		AT5G60690	-0.590485	-0.425026
247404_at	469.22	409.47	431.32	452.17	418.42	434.67	495.4	454.71		AT5G62890	-0.0426563	0.104881
247309_at	215.2	202.34	216.36	208.57	128.99	181.77	143.07	150.7		AT5G63940	-0.426114	-0.532538
247153_at	344.88	321.46	392.39	408.06	277.56	246.73	280.83	228.88		AT5G65700	-0.345893	-0.651135
247048_at	85.26	70.1	77.89	87.77	57.56	54.64	40.79	37.55		AT5G66560	-0.469542	-1.0804
247031_at	13.93	12.57	16	15.19	26.75	19.28	15.86	14.09		AT5G67230	0.796582	-0.0585275
246990_at	204.37	203.93	266.6	262.19	407.16	271.53	285.35	287.01		AT5G67360	0.733123	0.114228
246849_at	249.58	211.86	221.82	250.77	198.64	226.58	184.1	182.78		AT5G26850	-0.117934	-0.365281
246800_at	206.26	252.71	270.56	279.64	137.19	119.82	155.31	115.23		AT5G26780	-0.836575	-1.02411
246763_at	242.6	261.91	217.6	213.88	285.82	237.23	228.18	235.59		AT5G27150	0.052066	0.104116
246591_at	125.07	153.82	97.78	100.2	68.99	65.08	66.52	68.06		AT5G14880	-1.05671	-0.556891
246516_at	55.68	64.89	72.19	70.12	46.11	43.93	53.37	59.02		AT5G15740	-0.421233	-0.340523
246483_at	138.24	121.55	141.54	141.33	75.13	66.58	93.61	72.79		AT5G16000	-0.874404	-0.765484
245803_at	1131.5	1206.59	1183.28	1152.84	2390.51	1891.58	2503.73	2613.28		AT1G47128	0.872985	1.13119
245748_at	46.64	60.44	65.86	59.63	595.9	370.56	353.72	325.61		AT1G51140	3.17402	2.43654
245492_at	104.22	122.42	173.83	146.31	78.41	84.03	91.53	64.51		AT4G16340	-0.480496	-1.03679

## Sheet: drought_shoot
ID	Control-Shoots-6.0h_Rep1	Control-Shoots-6.0h_Rep2	Control-Shoots-12.0h_Rep1	Control-Shoots-12.0h_Rep2	Droughtstress-Shoots-6.0h_Rep1	Droughtstress-Shoots-6.0h_Rep2	Droughtstress-Shoots-12.0h_Rep1	Droughtstress-Shoots-12.0h_Rep2		ID	6h_Shoot_Drought/CK	24h_Shoot_Drought/CK
267619_at	170.34	175	169.97	166.85	149.62	154.23	174.11	193.65		AT2G26730	-0.184658	0.0221154
267316_at	87.13	72.93	100.06	103.49	91.67	86.48	110.31	89.98		AT2G34710	0.15448	0.111558
266927_at	2017.66	1761.41	2254.76	2151.5	2307.24	2440.14	2302.85	2219.52		AT2G45960	0.3291	0.301135
266314_at	168.6	164.69	207.9	186.5	175.49	142.43	157.13	158.38		AT2G27040	-0.0681143	-0.0609152
266254_at	184	195.56	203.54	152.79	230.21	219.19	202.3	198.22		AT2G27810	0.243672	0.192502
266022_at	386.6	410.68	538.41	519.36	366.18	346.66	569.12	528.87		AT2G05920	-0.161508	-0.0873257
265377_at	939.99	862.14	848.03	753.22	912.58	975.08	852.53	712.3		AT2G05790	0.0668958	-0.216857
264315_at	718.04	675	1020.4	1055.69	630.67	585.57	913.19	917.45		AT1G70370	-0.195809	0.0826089
264147_at	101.95	84.81	152.27	92	90.56	74.51	103.5	79.86		AT1G02205.1	-0.178108	0.502447
264146_at	225.23	184.43	344	212.56	224.91	186.68	215.45	200.09		AT1G02205.2	0.0067809	0.286321
263942_at	81.23	86.15	108.58	114.16	50.04	68.4	130.28	115.25		AT2G35860	-0.498971	0.650997
263629_at	26.79	20.62	36.92	38.17	39.69	22.8	31.55	30.76		AT2G04850	0.398434	-0.179681
263590_at	263.22	269.47	239.55	234.86	284.94	282.91	246.25	242.53		AT2G01820	0.0922137	0.267234
263326_at	406.8	443.23	360.47	339.65	338.85	393.57	346.85	384.49		AT2G04280	-0.214843	-0.0418853
262850_at	313.68	304.62	228.21	235.91	270.05	268.32	202.84	190.16		AT1G14920	-0.199709	0.445092
262806_at	232.97	221.46	321.86	306.53	193.74	155.95	264.65	346.76		AT1G20950	-0.377982	-0.447072
262230_at	480.44	483.97	312.22	339.48	454.57	537.48	401.52	389.81		AT1G68560	0.0407662	0.0703642
262209_at	83.59	108.05	113.96	126.99	102.58	86.87	126.16	110.57		AT1G74720	-0.0165816	-0.0394818
262181_at	100.32	94.08	148.44	133.68	117.99	106.86	151.37	136.64		AT1G78060	0.209935	0.126254
261783_at	192.86	209.46	285.73	214.38	254.9	236.93	295.85	277.52		AT1G08190	0.289816	-0.0215301
261653_at	45.09	60.3	56.12	59.26	67.25	72.77	75.07	50.39		AT1G01900	0.409895	0.217897
261498_at	222.57	237.57	216.43	231.69	211.4	234.37	232.47	251.22		AT1G28440	-0.0457733	0.00298233
261399_at	23.38	22.71	28.31	27.5	43.07	38.52	41.71	37.09		AT1G79620	0.823939	-0.519162
261363_at	244.12	202.81	288.51	271.75	211.13	213.93	256.32	238.64		AT1G41830	-0.0723824	-0.0805302
260645_at	79.86	77.54	58.46	60.96	70.41	71.39	64.27	61.13		AT1G53300	-0.150578	0.29632
260615_at	902.56	962.64	1123.42	1092.99	711.79	731.77	1009.19	1019.72		AT1G53240	-0.369699	-0.0108593
260511_at	291.81	353.97	253.12	235.41	256.2	281.26	263.54	232.44		AT1G51570	-0.264885	0.283629
260352_at	97.52	94.45	109.75	99.19	102.62	78.66	125.36	122.89		AT1G69295	-0.0826611	0.468118
259858_at	81.68	84.18	94.05	71.94	90.9	80.83	88.41	72.45		AT1G68400	0.0501761	0.570677
259736_at	261.09	258.53	440.17	377.42	125.46	111.49	365.19	429.4		AT1G64390	-1.13287	-0.174503
259021_at	74.86	72.23	75.97	65.86	100.88	95.38	84.82	78.68		AT3G07540	0.416067	0.811517
258938_at	129.11	104.73	121.54	118.45	119.87	120.14	120.15	107.29		AT3G10080	0.0375728	-0.108429
258684_at	151.79	161.2	163.82	167.88	136.42	136.64	142.25	163.63		AT3G08680	-0.196899	0.154588
258368_at	342.94	374.41	199.59	234	359.04	413.78	288.41	251.4		AT3G14240	0.107455	0.417285
258286_at	105.26	104.47	127.95	128.53	97.49	105.51	128.55	129.33		AT3G16060	-0.0470535	-0.328251
258159_at	83.27	89.59	148.31	113	81.71	67.02	138.21	129.6		AT3G17840	-0.216908	0.716932
258040_at	108.08	118.01	195.2	174.16	108	88.14	198.31	208.29		AT3G21190	-0.205013	-0.107651
257949_at	99.59	96.51	271.03	229.26	127.37	123.2	249.74	250.39		AT3G21750	0.353624	0.415669
257938_at	1120.07	1324.14	1017.69	967.85	1177.58	1629.47	1394.86	1049.09		AT3G19820	0.199687	0.474418
257789_at	323.25	317.83	446.57	461.2	405.22	465.89	467.13	427.91		AT3G27020	0.442351	0.0117306
257722_at	703.65	625.74	729.97	713.51	934.44	1080.82	782.96	766.83		AT3G18490	0.600202	0.53204
257510_at	210.25	224.21	266.37	262.99	193.03	190.55	257.69	233.52		AT1G55360	-0.179696	0.0332159
256997_at	282.53	283.48	371.67	385.35	413.07	438.1	453.82	423.73		AT3G14067	0.58862	0.787969
256960_at	83.05	79.26	128.17	118.18	89.38	74.48	121.9	116.34		AT3G13510	0.0137118	0.135005
256034_at	400.08	427.46	565.15	383.17	448.18	557.36	561.6	564.42		AT1G07080	0.28107	0.55076
256022_at	233.07	226.38	260.43	211.65	396.01	466.06	334.37	332.61		AT1G58360	0.907897	0.199343
255785_at	221.86	221.86	515.53	512.68	211.09	177.45	431.32	445.13		AT1G19920	-0.191586	-0.670362
255674_at	1134.39	1141.77	1340.58	1321.07	1072.17	1113.03	1300.37	1298.98		AT4G00430	-0.0588366	0.0698549
255638_at	144.85	147.16	115.26	116.1	170.99	172.58	135.08	155.52		AT4G00740	0.234586	0.0265882
254341_at	64.14	85.36	73.26	75.01	63.73	84.51	79.21	86.38		AT4G22130	-0.0122107	0.0383774
254209_at	23.04	32.72	52.41	48.78	34.28	28.33	36.66	44.15		AT4G23490	0.167163	0.154468
253698_at	113.52	141.21	129.05	122.05	142.92	121.87	158.99	168.71		AT4G29680	0.0558798	-0.0813442
253692_at	87.71	77.07	104.41	85.31	66.67	66.67	89.15	94.44		AT4G29720	-0.305432	0.121502
253218_at	376.78	345.61	348.63	325.22	394.49	398.58	378.29	388.01		AT4G34980	0.13467	0.68822
253090_at	306.73	288.45	400.77	388.28	234.72	237	402.47	402.29		AT4G36360	-0.335395	-0.0300618
253033_at	207.17	254.92	333.52	267.07	236.19	254.07	399.6	357.35		AT4G38220	0.0853732	0.100766
253006_at	329.2	439.06	437.99	460.41	520.36	543.87	568.2	516.43		AT4G38250	0.470143	0.362202
252954_at	158.78	178.62	263.08	233.81	152.83	136.84	249.54	251.38		AT4G38660	-0.22005	0.0339239
252033_at	402.84	424.26	418.55	442.14	433.29	419.21	440.45	468.36		AT3G51950	0.0436381	0.327152
251714_at	200.51	192.77	334.98	306.56	161.3	168.87	285.22	266.25		AT3G56370	-0.252348	-0.246643
251122_at	233.75	269.32	254.92	225.65	297.15	317.96	275.94	231.84		AT5G01020	0.290085	0.226863
251075_at	71.06	66.45	108.72	90.55	82.98	55.07	108.12	110.14		AT5G01890	0.00565435	0.142552
250933_at	70.16	82.98	81.98	69.27	68.57	70.82	73.72	77.31		AT5G03170	-0.135724	0.379793
250661_at	350.76	373.14	279.19	248.36	330.82	383.4	263.63	302.73		AT5G07030	-0.0194219	0.571712
250600_at	34.53	36.49	37.07	47.72	34.25	29.48	40.02	38.51		AT5G07800	-0.156253	0.027906
250490_at	122.76	115.25	157.62	147.07	103.98	94.04	137.59	143.39		AT5G09760	-0.265376	-0.0494713
250408_at	56.18	40	81.78	65.18	46.36	52.26	55.4	45.74		AT5G10930	0.0361433	0.388443
250253_at	162.97	157.49	151.4	153.62	211.09	219.54	188.77	168.85		AT5G13640	0.426305	0.0301716
248764_at	130.22	130.13	337.11	317.57	159.64	121.68	240.83	230.62		AT5G47640	0.11176	0.422408
248419_at	635.24	662.97	438.66	450.3	734.79	716.54	467.67	427.55		AT5G51550	0.160852	0.429363
248249_at	140.14	153.48	138.74	122.62	98.21	105.11	130.12	126.15		AT5G53140	-0.530198	-0.0576871
248095_at	329.86	340.07	229.19	212.68	257.68	291.67	219.25	201.94		AT5G55230	-0.286285	0.113077
248085_at	83.5	97.94	107.68	97.82	67.83	61.99	107	98.02		AT5G55480	-0.48298	-0.0664407
247638_at	50.87	48.34	50.23	58.28	44.54	35.38	53.94	55.7		AT5G60490	-0.311929	-0.00694731
247589_at	117.42	121.14	186.1	164	107.89	100.22	196.68	175.11		AT5G60690	-0.197006	-0.308048
247404_at	321.72	332.4	385.82	379.05	319.41	301.02	393.48	390.78		AT5G62890	-0.0762869	0.257533
247309_at	80.5	79.76	145.33	143.53	80.78	78.88	156.99	166.95		AT5G63940	-0.00541147	-0.139814
247153_at	180.46	228.58	249.97	242.26	230.98	200.59	284.1	238.95		AT5G65700	0.0773526	0.423895
247048_at	69.1	61.63	47.02	43.85	62.66	67.15	45.89	35.98		AT5G66560	-0.0101887	0.302382
247031_at	32.39	30.94	48	50.75	37.48	39.73	55.05	52.13		AT5G67230	0.285899	-0.884902
246990_at	302.49	318.6	315.2	309.63	315.67	396.87	427.32	412.21		AT5G67360	0.198169	0.504126
246849_at	174.83	159.65	143.55	137.91	148.96	150.06	152.99	126.74		AT5G26850	-0.161678	0.129045
246800_at	190.58	172.76	208.22	204.75	168.81	177.94	202.9	221.14		AT5G26780	-0.0674243	-0.0575044
246763_at	221.57	248.14	432.79	439.97	223.83	238.13	402.94	372.2		AT5G27150	-0.0240024	-0.271938
246591_at	94.04	87.3	135.87	120.7	84.5	98.92	169.09	102.51		AT5G14880	0.0164538	0.189287
246516_at	53.5	60.75	74.3	68.65	48.33	43.32	76.38	67.18		AT5G15740	-0.317987	0.0662591
246483_at	145.19	144.98	96.78	92.37	125.02	140.25	108.03	115.24		AT5G16000	-0.129437	0.179268
245803_at	1178.39	1322.99	1429.48	1520.2	1681.05	1945.11	1625.62	1580.21		AT1G47128	0.535718	-0.000602754
245748_at	64.34	51.61	170.24	153.76	62.47	59.63	134.57	134.97		AT1G51140	0.0745604	0.0227311
245492_at	102.47	89.46	120.08	112.54	86.34	86.76	100.27	100.88		AT4G16340	-0.148975	0.0240181

## Sheet: drought_root
ID	Control-Roots-6.0h_Rep1	Control-Roots-6.0h_Rep2	Control-Roots-12.0h_Rep1	Control-Roots-12.0h_Rep2	Droughtstress-Roots-6.0h_Rep1	Droughtstress-Roots-6.0h_Rep2	Droughtstress-Roots-12.0h_Rep1	Droughtstress-Roots-12.0h_Rep2		ID	6h_Root_Drought/CK	24h_Root_Drought/CK
267619_at	150.32	139.02	176.44	186.36	126.27	143.59	168.75	214.2		AT2G26730	-0.100555	-0.116683
267316_at	124.34	108.21	149.95	150.25	146.57	166.52	148.57	145.36		AT2G34710	0.429036	0.209125
266927_at	1096.08	1634.24	1331.62	1338.12	1809.54	1573.94	1405.78	1193.01		AT2G45960	0.309438	0.154755
266314_at	172.3	156.66	203.64	165.64	128.89	169.9	182.07	150.03		AT2G27040	-0.13878	-0.0828005
266254_at	103.07	96.57	127.44	133.49	108.61	110.53	134.01	129.33		AT2G27810	0.134452	0.173312
266022_at	550.43	546.71	739.23	658.74	458.02	440.75	672.47	759.86		AT2G05920	-0.287724	-0.0245225
265377_at	665.12	521.86	637.95	650.34	447.97	417.09	526.92	464.96		AT2G05790	-0.456424	-0.00533595
264315_at	266.19	257.9	413.18	380.06	130.18	170.02	336.07	399.24		AT1G70370	-0.803891	0.243009
264147_at	2.12	1.51	0.53	5.91	1.76	0.53	0.51	0.63		AT1G02205.1	-0.664622	-1.49712
264146_at	2.15	2.39	7.96	1.19	1.85	1.58	5.04	1.57		AT1G02205.2	-0.404484	-1.0466
263942_at	76.36	88.81	80.21	133.1	70.35	73.92	143.72	177.07		AT2G35860	-0.19518	0.3808
263629_at	12.57	19.13	18.97	16.24	12.76	15.36	23.02	25.5		AT2G04850	-0.172886	0.622355
263590_at	212.55	185.98	248.48	246.46	192.35	192.71	255.69	243.24		AT2G01820	-0.0496051	0.173031
263326_at	390.41	451.28	411.25	449.72	313.39	329.19	423.12	444.73		AT2G04280	-0.389413	0.0925703
262850_at	184.16	156.96	128.48	166.76	161.99	138.42	142.23	120.36		AT1G14920	-0.183347	0.090582
262806_at	631.24	663.32	985.31	897.66	517.62	552.79	883.69	865.14		AT1G20950	-0.274298	0.169888
262230_at	187.22	239.01	186.39	196.52	216.29	170.54	198.99	295.11		AT1G68560	-0.139932	0.298943
262209_at	88.73	80.41	120.46	117.92	88.92	85.73	107.42	110.51		AT1G74720	0.0462488	0.12862
262181_at	138.87	139.79	262.31	238.09	211.55	257.06	289.6	317.61		AT1G78060	0.749882	0.388572
261783_at	199.08	178.21	205.07	234.25	189.64	201.21	241.77	245.15		AT1G08190	0.0509412	-0.0908468
261653_at	0.82	9.87	6.1	6.99	2.44	5.42	13.59	13.72		AT1G01900	-0.443661	0.135215
261498_at	256.6	242.64	293.68	274.05	268.11	235.55	258.51	286.18		AT1G28440	0.0127166	-0.0299415
261399_at	27.59	33.28	33.02	25.92	23.27	25.92	30.02	49.5		AT1G79620	-0.307366	0.557336
261363_at	434.75	465.85	503.64	548.07	315.02	263.58	547.52	642.52		AT1G41830	-0.63832	0.0982081
260645_at	76.44	72.09	103.31	98.92	57.86	58.84	88.63	111.34		AT1G53300	-0.34795	-0.0133756
260615_at	886.71	798.31	934.09	958.68	717.1	674.17	967.39	961.65		AT1G53240	-0.276363	0.234814
260511_at	139.35	139.22	170.44	142.66	127.91	134.92	132.38	142.88		AT1G51570	-0.0839099	0.263183
260352_at	96.2	100.12	149.59	141.37	137.61	149.29	181.64	167.22		AT1G69295	0.547341	0.114674
259858_at	75.02	58.91	78.85	76.49	74.47	73.39	91.51	90.68		AT1G68400	0.142753	0.0209013
259736_at	449.52	328.49	649.81	610.89	269.18	383.39	530.31	703.31		AT1G64390	-0.253656	-0.449882
259021_at	93.83	61.49	97.06	61.77	97.27	140.5	63.82	83.88		AT3G07540	0.614323	0.0542663
258938_at	38.92	42.37	62.62	49.95	34.77	42.13	57.61	68.69		AT3G10080	-0.0800943	0.746733
258684_at	168.56	163.12	209.47	193.36	137.73	138.13	203.96	185.57		AT3G08680	-0.265856	0.118764
258368_at	182.12	173.54	173.21	188.98	226.14	212.81	214.42	212.62		AT3G14240	0.303558	0.142939
258286_at	156.39	163.09	159.88	192.39	126.33	140.46	145.07	162.65		AT3G16060	-0.260021	0.0662864
258159_at	86.84	61.83	105.1	103	84.55	81.81	134.54	110.78		AT3G17840	0.162195	0.517416
258040_at	210.8	204.28	272.86	268.82	152.74	146.61	270.42	325.47		AT3G21190	-0.471556	0.0425999
257949_at	19.29	17.32	32.94	19	19.32	32.26	24.67	31.64		AT3G21750	0.494574	0.255476
257938_at	1886.8	1780.95	2202.17	2415.81	2116.6	1576.95	2319.85	2133.19		AT3G19820	0.0101128	0.186715
257789_at	194.46	202.02	221.91	227.88	209.35	167.02	196.42	166.97		AT3G27020	-0.0750965	0.0929043
257722_at	175.74	134.5	237.72	202.43	226.75	265.76	201.29	167.51		AT3G18490	0.666768	0.21384
257510_at	159.26	165.27	168.98	165.31	148.74	148	156.35	164.94		AT1G55360	-0.129152	0.00859594
256997_at	174.66	195.31	182.28	214.87	219.82	192.62	159.22	163.94		AT3G14067	0.156776	-0.0820927
256960_at	45.14	45.76	74.82	68.54	49.04	52.38	67	65.13		AT3G13510	0.15799	0.288743
256034_at	374.25	371.28	395.93	359.04	344.89	360.46	380.99	338.9		AT1G07080	-0.0799271	-0.314958
256022_at	100.51	75.81	165.29	171.5	128.21	188.06	132.57	120.47		AT1G58360	0.842961	-0.00952688
255785_at	149.38	171	173.91	180.4	161.18	141.99	168.28	200.23		AT1G19920	-0.0796571	-0.063757
255674_at	334.65	297.44	513.58	517.74	260.12	314.04	503.33	437.28		AT4G00430	-0.138677	-0.155856
255638_at	220.39	200.91	184.28	214.38	194.99	182.31	225.27	240.88		AT4G00740	-0.159136	-0.0182881
254341_at	199.5	184.95	251.36	269.31	147.57	169.9	228.96	271.56		AT4G22130	-0.276176	0.0636256
254209_at	43.93	59.01	69.86	81.66	33.35	38.2	65.52	59.64		AT4G23490	-0.52478	-0.252075
253698_at	220.64	259.57	256.2	288.13	195.86	203.34	264.03	235.57		AT4G29680	-0.266554	0.15752
253692_at	89.58	68.88	111.36	89.22	73.98	106.04	115.99	114.37		AT4G29720	0.184038	0.0461046
253218_at	172.94	193.27	219.94	232.29	192.44	192.21	252.05	286.59		AT4G34980	0.0708751	-0.025715
253090_at	217.12	216.96	339.72	341.36	149.69	244.26	323.72	375.46		AT4G36360	-0.139948	-0.125315
253033_at	301.88	294.17	333.02	333.62	350	248.03	286.97	342.79		AT4G38220	0.0047845	0.13943
253006_at	194.65	293.39	228.52	200.25	205.94	213.01	167.84	303.02		AT4G38250	-0.220221	-0.0262477
252954_at	200.7	214.43	264.83	253.5	234.13	220.65	240.37	358.63		AT4G38660	0.131606	0.236397
252033_at	482.5	401.47	492.79	420.37	394.66	401.21	408.03	372.14		AT3G51950	-0.151465	-0.676045
251714_at	238.87	223.13	342.27	360.1	235.69	192.96	330.35	308.8		AT3G56370	-0.108093	0.0933132
251122_at	287.8	346.6	315.84	303.33	361.77	259.86	286.17	278.53		AT5G01020	-0.0293366	0.155246
251075_at	137.13	139.13	191.72	192.73	147.25	162.86	246.89	217.97		AT5G01890	0.166753	0.163811
250933_at	55.44	63.19	74.71	40.05	36.77	27.7	43.56	51.1		AT5G03170	-0.879769	0.0104088
250661_at	378	243.87	449.31	425.26	266.06	227.98	473.48	585.08		AT5G07030	-0.331985	-0.181517
250600_at	14.59	26.62	20.69	22.63	14.35	24.26	25.89	23.14		AT5G07800	-0.0940199	-0.0354855
250490_at	150.57	156.28	141.79	137.57	88.55	102.66	138.65	190.68		AT5G09760	-0.682376	-0.0376845
250408_at	47.32	50.97	43.44	39.31	57.68	59.4	54.17	52.97		AT5G10930	0.252378	0.113527
250253_at	115.51	136.3	128.77	125.53	146.12	140.97	121.27	126.71		AT5G13640	0.189168	0.11895
248764_at	43.05	46.9	53.77	44.85	42.21	40.41	44.22	45.55		AT5G47640	-0.122632	-0.0310968
248419_at	294.29	260.88	332.78	336.44	223.69	256.3	280.19	313.44		AT5G51550	-0.209925	0.150612
248249_at	136.62	143.26	145.42	144.7	117.35	109.89	135.19	140.93		AT5G53140	-0.300592	0.171001
248095_at	152.05	136.75	153.86	143.98	137.33	129.17	157.3	149.13		AT5G55230	-0.115935	-0.0103908
248085_at	151.67	145.12	189.08	179.99	109.82	116.8	169.79	197.1		AT5G55480	-0.389167	0.0397199
247638_at	44.47	45.8	39.66	40.25	29.38	24.73	42.66	46.19		AT5G60490	-0.738351	-0.00955275
247589_at	234.46	217.07	262.4	263.24	247.22	273.09	256.19	288.13		AT5G60690	0.20455	-0.0276257
247404_at	469.22	409.47	431.32	452.17	409.1	416.19	478.17	463.36		AT5G62890	-0.0904531	-0.067367
247309_at	215.2	202.34	216.36	208.57	185.75	151.43	187.78	201.01		AT5G63940	-0.308395	0.0795849
247153_at	344.88	321.46	392.39	408.06	313.01	323.96	454.81	398.14		AT5G65700	-0.0650331	-0.0963923
247048_at	85.26	70.1	77.89	87.77	56.13	58.84	78.31	77.27		AT5G66560	-0.434358	0.211188
247031_at	13.93	12.57	16	15.19	9.58	2.04	17.2	5.9		AT5G67230	-1.18938	-1.09676
246990_at	204.37	203.93	266.6	262.19	281.9	303.12	240.76	247.35		AT5G67360	0.518856	0.256857
246849_at	249.58	211.86	221.82	250.77	228.19	208.11	240.8	193.66		AT5G26850	-0.0808226	0.072724
246800_at	206.26	252.71	270.56	279.64	216.02	250.31	257.38	285.93		AT5G26780	0.0229514	0.0653462
246763_at	242.6	261.91	217.6	213.88	224.1	177.38	219.85	239.29		AT5G27150	-0.329555	-0.130544
246591_at	125.07	153.82	97.78	100.2	122.44	91.6	115.09	111.92		AT5G14880	-0.381816	-0.0996454
246516_at	55.68	64.89	72.19	70.12	58.06	57.08	70.33	89.87		AT5G15740	-0.0664819	-0.214184
246483_at	138.24	121.55	141.54	141.33	129.42	114.94	132.5	146.25		AT5G16000	-0.0883378	0.0643438
245803_at	1131.5	1206.59	1183.28	1152.84	1545.33	1394.85	1118.25	1104.77		AT1G47128	0.330574	-0.0476032
245748_at	46.64	60.44	65.86	59.63	82.23	88.99	67.01	54.38		AT1G51140	0.677162	-0.199137
245492_at	104.22	122.42	173.83	146.31	100.9	102.42	146.11	156.41		AT4G16340	-0.15665	0.0373152

## Sheet: Sheet2
ID	0.5h_Shoot_Drought/CK	1h_Shoot_Drought/CK	3h_Shoot_Drought/CK	6h_Shoot_Drought/CK	12h_Shoot_Drought/CK	24h_Shoot_Drought/CK	0.5h_Root_Drought/CK	1h_Root_Drought/CK	3h_Root_Drought/CK	6h_Root_Drought/CK	12h_Root_Drought/CK	24h_Root_Drought/CK	0.5h_Shoot_Osmotic/CK	1h_Shoot_Osmotic/CK	3h_Shoot_Osmotic/CK	6h_Shoot_Osmotic/CK	12h_Shoot_Osmotic/CK	24h_Shoot_Osmotic/CK	0.5h_Root_Osmotic/CK	1h_Root_Osmotic/CK	3h_Root_Osmotic/CK	6h_Root_Osmotic/CK	12h_Root_Osmotic/CK	24h_Root_Osmotic/CK	0.5h_Shoot_Salt/CK	1h_Shoot_Salt/CK	3h_Shoot_Salt/CK	6h_Shoot_Salt/CK	12h_Shoot_Salt/CK	24h_Shoot_Salt/CK	0.5h_Root_Salt/CK	1h_Root_Salt/CK	3h_Root_Salt/CK	6h_Root_Salt/CK	12h_Root_Salt/CK	24h_Root_Salt/CK
AT2G26730	0.49543	0.286254	0.38147	-0.184658	0.126787	0.0221154	-0.1263	-0.145437	-0.171765	-0.100555	0.0779816	-0.116683	-0.308374	-0.0357772	-0.274942	-0.867572	-1.40284	-1.64039	0.041895	-0.0913674	-0.404149	-0.508446	-0.932871	-1.1312	-0.0836002	0.0266449	-0.0196682	-0.0428232	0.0747842	0.18451	-0.0325485	-0.181534	-0.437798	-0.813977	-0.850616	-1.15969
AT2G45590	0.406846	0.747033	0.294657	0.106327	-0.00521848	0.097907	-0.617122	-0.410168	-0.0291691	-0.571582	-0.0018547	-0.0705291	-0.208201	0.408958	-0.399351	-0.469181	-0.761684	-0.832143	-0.470691	-0.636407	-1.06262	-1.24474	-1.3615	-1.05909	0.267077	0.580995	0.275735	0.215096	0.0807438	-0.334154	-0.339609	-0.603052	-1.16527	-1.00147	-1.77546	-1.08206
AT2G19170	0.049842	0.0881766	0.215218	-0.19527	-0.0800369	0.173186	0.105916	-0.333503	-0.146308	-0.505285	-0.081042	0.151698	0.0788996	0.204755	-1.17744	-1.53119	-1.5115	-1.90457	0.156024	-0.0756701	-1.00575	-1.16115	-0.976045	-0.978617	0.0830328	0.298271	-0.546789	-0.235732	0.0706685	-0.195246	-0.0531988	-0.49236	-0.599805	-0.610792	-1.02354	-0.940587
AT2G33880	-0.992871	0.0427867	-0.127521	-0.817275	0.153469	0.491589	0.259021	-0.0697168	-0.388702	-0.08167	0.223442	-0.485121	0.603307	0.459739	-0.534614	-0.572748	-0.10991	-0.600484	0.92042	-0.214631	-0.577834	0.0953231	0.581282	0.442345	-0.149028	0.601784	0.435899	-0.558657	-0.0598769	-0.0424211	0.321928	-0.54901	-0.0443001	0.0508461	-0.0581281	-0.30499
AT2G33860	0.0579981	0.420685	0.326872	-0.083822	-0.039236	0.0155855	-0.171454	-0.488584	0.15874	0.0920109	-0.0306246	-0.154988	0.136301	0.453458	-0.732826	-0.504011	-0.887666	-1.91789	0.0215161	-0.55944	-0.626497	-0.573942	-0.990415	-0.147902	0.306791	0.59576	-0.121573	-0.0358657	-0.24087	-0.981067	-0.264234	0.055351	-0.733024	-1.51945	-0.926598	-0.723754
AT2G34870	-0.490528	-0.430385	0.743124	0.242276	0.172061	0.0583642	-2.14359	-0.483985	-1.91173	0.862141	-1.79462	0.0906704	0.129768	-0.0584167	-0.347222	-0.203284	-0.251539	-0.960829	-1.46133	0.0840643	-0.731459	-0.0803734	-1.1375	-0.612518	2.06431	-0.106915	0.383843	0.296982	0.32577	0.203359	-1.96499	-0.514573	-2.07647	-0.126177	-1.10274	-0.509014
AT2G26330	-0.0189796	-0.275937	-0.505813	0.148286	-0.25969	-0.298701	-0.584963	-0.0907655	-0.487728	-1.31982	0.620942	0.0331669	-0.841535	-0.0636592	-0.977429	-0.635546	-1.16641	-1.79723	0.446746	1.09366	0.0837389	-1	0.717157	0.246161	0.00154108	0.0959018	0.338422	0.59988	0.293378	-0.281995	0.156804	-0.0814276	-0.503938	-1.24793	0.135515	-0.338802
AT2G34710	-0.13688	-0.12087	0.239153	0.15448	-0.0232928	0.111558	-0.0602213	0.176548	0.0741965	0.429036	-0.0304514	0.209125	-0.00806672	0.128811	-0.699059	-0.330267	-0.903042	-0.936954	0.0827239	0.164705	-0.324694	-0.0335781	-0.438031	-0.17429	0.174212	0.154603	-0.505897	-0.478108	-0.739922	-0.651307	0.162316	0.197331	-0.883169	-0.994242	-0.684816	-0.772127
AT2G45960	0.139062	0.228568	-0.0942322	0.3291	0.0375244	0.301135	-0.122758	-0.203966	0.0954033	0.309438	-0.0388592	0.154755	-0.313147	-0.0779616	-0.13755	-0.453922	-1.00412	-0.746816	-0.212692	0.297116	0.401899	0.493497	0.76503	0.33084	-0.0128039	0.178572	0.237237	0.147824	-0.283015	-0.077075	0.173567	0.0958919	-0.207182	-0.554458	0.174621	0.134049
AT2G01570	0.0818494	0.486014	-0.190089	0.0347156	0.0944298	0.239984	0.0964381	-0.161295	0.115136	-0.0471749	-0.05109	-0.239649	-0.293993	0.136624	-0.474632	-0.342139	-0.4554	-0.703701	0.217257	-0.362541	-0.433355	-0.105508	-0.199669	-0.334468	0.0768401	-0.071961	-0.185714	-0.0313642	0.0688042	0.024472	0.138409	-0.0502659	0.148476	0.651211	-0.220295	-0.214255
AT2G27040	0.230426	-0.0522887	-0.310237	-0.0681143	-0.321974	-0.0609152	-0.0457858	-0.151922	-0.156264	-0.13878	-0.153097	-0.0828005	-0.0331712	0.0618878	-0.708256	-1.14156	-1.22059	-1.89096	0.256563	0.266072	0.13575	-0.0345301	-0.180729	-0.112888	0.262531	0.191554	-0.195046	-0.0616848	-0.300146	-0.711302	0.198763	0.231861	0.00869567	0.351171	-0.200704	-0.371966
AT2G27810	0.00759772	-0.21268	0.118739	0.243672	0.16866	0.192502	0.206822	0.209907	0.0999307	0.134452	0.0132639	0.173312	-0.0626455	-0.197015	-0.965566	-0.864142	-1.40314	-2.1028	-0.116963	-0.0147379	-0.326267	-0.436686	-0.861105	-0.964123	-0.0434524	-0.278003	-0.334836	-0.14343	0.0106895	-0.264761	0.151046	0.106394	-0.48905	-0.34324	-0.837299	-0.887638
AT2G05920	0.173228	-0.00918654	0.190808	-0.161508	0.053839	-0.0873257	0.27269	-0.343705	0.0149422	-0.287724	0.0350305	-0.0245225	-0.178347	-0.156211	-0.456793	-0.546027	-0.63725	-1.11968	-0.154159	-0.33094	-0.628153	-0.902684	-0.984306	-0.432093	-0.0365167	-0.0440984	-0.0708369	-0.0529286	0.136205	0.0729539	-0.0869328	-0.367678	-1.18212	-1.88371	-1.02567	-0.654022
AT2G37300	0.347393	-0.127602	0.317421	-0.468808	-0.148967	-0.258763	-0.425271	-0.62652	0.113908	-0.867916	-0.122964	0.116512	-0.282919	-0.0831283	0.232601	0.443377	0.378551	0.0882557	0.310824	0.385946	0.229199	-0.407837	-0.330226	-0.413	0.073466	0.0785983	1.32782	1.05701	0.97626	0.636118	-0.0528201	-0.129582	-0.993028	-1.70577	-0.649176	-0.75592
AT2G35620	0.246986	-0.24631	0.132222	-0.292114	-0.0365491	0.624223	0.379061	-0.0762568	-0.0568479	-0.482998	0.0608938	0.237541	0.143399	-0.112203	-0.562845	-0.928285	-0.920117	-1.28929	0.30487	-0.234389	-0.665086	-0.753614	-0.369275	-0.594336	0.0881908	-0.17353	-0.103359	-0.217599	0.254391	0.143576	0.194228	-0.363518	-0.877489	-0.444611	-0.212549	-0.452177
AT2G05790	0.0236215	0.167755	-0.0925208	0.0668958	-0.0331926	-0.216857	-0.125269	0.614253	0.105576	-0.456424	-0.37722	-0.00533595	-0.406187	-0.0235937	-1.60733	-2.13242	-2.5732	-3.34131	-0.261986	0.236403	-0.278435	-0.717745	-1.12528	-1.14887	-0.185852	0.0129082	-0.478107	-0.071402	-0.560679	-0.707046	-0.0322303	0.232901	-0.49893	-0.44526	-1.15407	-1.49478
AT2G28410	0.23395	-0.104026	0.0543798	-0.382768	-0.35623	-0.0334555	-0.852132	-1.1651	0.169109	-0.979107	0.216218	0.178908	-0.674037	-0.133012	-0.298942	-0.68393	-1.27654	-2.12381	-0.679466	-1.14068	-0.463082	-0.722498	-1.06151	-1.23386	0.0349891	0.044425	0.41979	-0.220355	-0.21678	-1.10713	-0.640363	-1.08633	-1.0269	-1.43064	-0.414993	-1.29888
AT1G23080	0.0709031	-0.334849	0.143668	0.346697	-0.139778	0.577219	0.223024	0.246938	0.223546	-0.0717401	0.45703	-0.0315258	-0.18179	0.162376	-1.56421	-0.898258	-1.31188	-2.10543	0.0442275	-0.262386	-1.07783	-1.20191	-0.0169265	-0.837942	0.387571	0.694634	-0.559864	-0.249471	-0.227404	-0.356848	0.346994	0.347136	-0.250398	-0.520001	0.267915	-0.51036
AT1G09750	-0.436139	-0.520252	-0.4236	-0.523428	-0.343945	0.330071	-0.385197	-0.945342	0.393598	-2.19049	-0.878121	0.118799	-0.155656	-0.158801	-2.32353	-2.94933	-3.65572	-4.39521	-0.718591	-1.0115	-1.21165	-3.2954	-3.56324	-2.56039	-0.0574285	-0.0719994	-1.38814	-1.68516	-1.71669	-1.8301	-0.478535	-0.830731	-2.12298	-3.39261	-2.10708	-1.74669
AT1G70370	0.338301	0.130447	0.389812	-0.195809	-0.181521	0.0826089	0.100983	-0.376803	-0.253179	-0.803891	-0.109405	0.243009	-0.0624155	-0.102159	-0.635016	-1.15652	-2.21623	-2.33365	0.289623	0.274222	-0.250642	-0.669273	-1.64776	-0.96764	0.0597762	-0.219499	-0.201669	-0.397265	-0.63528	-0.0267013	0.153282	0.0842891	-0.77758	-1.1215	-1.26923	-1.20958
AT1G78680	1.37032	0.971953	1.48574	0.773379	0.284911	0.458525	-0.107873	0.102953	0.303961	0.0597289	0.0852573	0.101869	0.0320093	0.285112	1.64954	1.22224	0.731924	1.29866	0.0670284	0.963241	1.45442	1.1427	1.3478	1.27424	0.134515	0.476814	1.89656	1.27305	1.34579	1.16085	0.263178	0.722808	0.745655	0.426111	1.24369	0.688353
AT1G02205.1	0.836185	1.0047	0.477604	-0.178108	-0.413798	0.502447	-0.638261	0.38405	0.569856	-0.664622	-2.49803	-1.49712	-0.697057	0.8557	1.50377	2.41524	1.72144	1.83136	1.42991	-0.251539	4.20671	4.00248	3.16718	3.61985	0.456286	0.747307	1.62352	2.78552	1.81767	2.55499	-0.174605	1.18903	0.459432	-0.204618	3.80895	2.82024
AT1G02205.2	0.339089	0.512381	0.319517	0.0067809	-0.42155	0.286321	-0.725424	-0.0832903	-0.978528	-0.404484	-0.469121	-1.0466	-0.837539	0.571985	1.39819	2.2344	1.51326	1.60426	1.17801	1.06283	3.7959	5.1709	3.70141	3.92975	0.226837	0.154586	1.4903	2.59623	1.70941	2.19724	-0.54722	0.686842	2.14173	3.44637	4.52869	3.58379
AT2G42840	0.0559749	-0.143606	0.0924675	-0.345022	-0.045429	-0.170372	0.435207	0.843742	-0.00544112	-0.536631	-0.257301	0.150104	-0.668992	0.0326044	-1.03598	-1.75359	-1.62107	-1.63947	0.290373	0.405864	-0.018038	-0.0464097	-1.07679	-1.34542	-0.108517	-0.156857	-0.0195374	-0.158808	0.0357438	-0.344131	-0.25809	0.423333	-0.831356	-1.75365	-1.38026	-2.74936
AT2G35860	0.401035	-0.227288	0.676586	-0.498971	0.140539	0.650997	0.540978	0.310638	0.687651	-0.19518	0.588678	0.3808	-0.103536	-0.391498	-0.754275	-1.38608	-1.09614	-1.47544	0.0685945	-0.353865	-0.223031	-1.26935	-0.878827	0.0438381	-0.19147	-0.381004	0.0156549	0.195573	0.121791	0.573669	-0.0362783	0.234035	-0.178267	-1.54865	-0.788441	-0.194723
AT2G04850	0.181701	0.0887437	0.897093	0.398434	-0.269157	-0.179681	0.252826	-0.852111	-0.035655	-0.172886	0.462594	0.622355	-0.0560622	0.109438	0.75417	1.36999	0.876093	0.417642	-0.285145	-0.445074	-0.0600681	-0.847269	-0.80449	-0.950769	0.0253729	0.302614	1.32847	1.26678	0.664269	0.374098	-0.177057	-0.690658	-1.08798	-1.20086	0.264672	-0.459151
AT2G01820	0.114676	-0.171202	0.0784387	0.0922137	0.0430508	0.267234	-0.0608059	-0.116068	-0.200673	-0.0496051	0.0115838	0.173031	-0.129078	-0.144311	-0.450738	0.0886524	0.158006	0.570457	-0.0488585	-0.0849712	-0.23239	-0.251303	-0.642043	0.0581528	-0.0615632	0.0724594	-0.184792	0.16938	0.169408	0.592252	0.117185	0.146557	-0.00680049	0.267173	-0.147624	0.225482
AT2G04160	0.256966	0.400335	0.561512	0.430548	0.621128	0.480004	0.164215	0.0225533	0.197326	-0.311732	0.0897585	-0.0507347	-0.314267	0.144664	0.450642	0.607054	1.8125	1.69415	0.00271362	-0.0685731	-0.247217	-1.32014	-1.45734	-0.816645	-0.100146	0.152927	0.43372	0.608873	1.00164	2.05864	-0.0572084	-0.149541	-0.0546131	-0.454705	-0.685994	-0.100512
AT2G04280	-0.272618	-0.51439	-0.265094	-0.214843	0.0629401	-0.0418853	-0.314834	-0.440162	-0.314001	-0.389413	0.0114827	0.0925703	-0.136843	-0.543275	-1.03438	-1.13358	-0.466243	-1.01912	-0.395806	-0.535694	-0.775566	-1.06556	-1.2357	-1.10019	-0.170796	-0.417065	0.0778416	0.349341	0.678945	0.406772	-0.343501	-0.516656	-1.1365	-1.59246	-1.27924	-1.4499
AT2G47160	0.551385	-0.348438	0.577645	0.0997262	0.563829	-0.321819	-0.615846	-0.923225	-0.0193899	-0.361052	0.119266	-0.424399	-0.400669	-1.28453	-1.40948	-1.95824	-1.99005	-2.32759	-0.510608	-0.466612	-0.563893	-1.43615	-0.430511	0.304195	-0.186065	-0.599552	-0.820011	-0.429398	-0.0912232	0.414972	-0.531631	-0.783968	-0.823955	-1.10397	-0.258629	0.907717
AT1G24020	-0.0801619	-0.47582	0.116955	0.0478845	-0.112092	-0.346251	-1.11994	0.850597	-0.536019	-0.538317	-0.853596	-0.938881	-0.79386	-0.48821	-1.27736	-1.60896	-1.68242	-2.66198	-0.244047	0.0828264	-1.39315	-1.3007	-2.81585	-1.91641	-0.0699358	-0.336556	0.239957	0.622411	-0.0799705	-0.435606	-0.16243	0.309887	-3.15134	-1.65349	-1.63011	-0.239935
AT1G75500	0.210205	-0.317739	0.271016	0.225943	0.129101	0.561181	-0.0132003	-0.608214	0.168213	-0.0911104	0.215898	0.141109	-0.334228	-0.344028	-1.20601	-1.10251	-1.66251	-2.45738	-0.120876	-0.399466	-1.10557	-1.50335	-1.40281	-2.58589	0.203219	-0.100203	-1.20781	-0.231833	-0.79191	-0.981997	-0.0847746	-0.326711	-1.31443	-1.64582	-1.07902	-1.97308
AT1G14920	-0.56615	-0.52324	-0.364222	-0.199709	-0.239969	0.445092	-0.0528217	0.35077	0.172189	-0.183347	-0.169076	0.090582	-0.897198	-0.276671	-1.00325	-0.847367	-0.50221	-0.523936	0.174241	0.0294306	0.06819	0.0543663	0.0738662	-0.33014	-0.350042	0.163701	-0.151606	-0.295227	-0.12131	-0.0320685	0.229088	0.300892	0.314892	-0.0937411	-0.585525	-1.0386
AT1G20950	0.154701	-0.0786462	-0.527004	-0.377982	-0.0395201	-0.447072	-0.12389	-0.417312	-0.28918	-0.274298	-0.10662	0.169888	0.0588498	0.023962	-0.591506	-1.26735	-1.27393	-2.32795	0.0101939	-0.113302	-0.476755	-1.0549	-1.63004	-1.4217	0.0831294	-0.0999495	-0.592792	-0.136136	0.236216	-0.16039	0.0497973	-0.202385	-0.795847	-0.858688	-1.66795	-1.15977
AT1G72970	-0.141268	-0.379359	-0.289478	-0.380802	-0.532187	-0.225135	0.23715	1.01783	-0.0312989	-0.0782164	-0.358446	0.191763	-0.534271	-0.620556	-1.28473	-2.25791	-2.96189	-3.50753	0.370871	0.648724	-0.0835033	-0.0322273	-1.03141	-1.07115	-0.11215	-0.522337	-0.264104	-0.120544	-0.615596	-1.04488	0.104056	0.566021	-0.247999	-0.359834	-1.41137	-1.84678
AT1G72810	-0.115178	0.110314	0.38616	0.449029	0.108153	0.122826	-0.426045	-0.133443	0.160183	0.206694	0.476896	0.26369	-0.143014	0.18259	-0.284634	0.045247	0.518615	-0.533107	-0.282926	-0.136805	-0.588225	-0.361828	-0.615603	-0.549827	-0.117752	0.259832	0.0420566	0.159131	0.678618	0.21204	-0.317595	0.0764129	-0.701202	-1.31215	-0.971911	-1.05333
AT1G68560	-0.150121	-0.0968872	0.351364	0.0407662	0.280071	0.0703642	0.13838	-0.575428	0.16182	-0.139932	0.367798	0.298943	-0.12688	0.126149	-1.41201	-1.39442	-1.34311	-2.00957	-0.127554	-0.327092	-0.244628	-1.41862	-1.63964	-1.22376	-0.287376	0.150299	-1.06965	-0.979517	-0.375171	-0.776086	-0.263373	-0.266157	-0.163419	-1.14737	-1.53439	-0.402329
AT1G74720	0.0607199	-0.197095	-0.000965585	-0.0165816	-0.0254913	-0.0394818	-0.124555	-0.0245194	-0.105044	0.0462488	-0.129398	0.12862	-0.33755	-0.180022	-0.325459	-0.332715	-0.451438	-0.736006	-0.0221053	0.0226675	-0.54641	-0.313339	-0.82362	-0.478533	-0.0250495	-0.152431	0.00939918	0.0181784	0.080405	-0.0850079	-0.0165078	0.288119	-0.613402	-1.28521	-1.11039	-0.883385
AT1G78060	0.399105	0.213485	0.251797	0.209935	0.02981	0.126254	0.0595463	0.0244723	-0.10067	0.749882	0.279114	0.388572	-0.216013	0.169346	-0.304122	-0.3185	-0.796136	-1.99671	-0.146683	-0.146764	-0.123922	-0.158888	-0.582672	-0.492484	0.259257	0.134681	0.380739	0.629632	0.73211	0.483688	0.140516	0.0154044	-0.678011	-0.202367	-0.272302	-0.00327137
AT1G80080	-0.00150098	-0.319595	0.0653661	-0.375207	-0.251921	-0.336701	-0.364723	-0.263958	0.554589	-0.172975	-0.316062	0.161518	0.0788182	-0.369765	-0.520484	-0.755559	-1.0878	-2.47753	0.791346	-1.35107	0.807355	0.444816	0.658627	0.0691424	0.159982	0.0155684	-0.0306138	-0.335814	-0.202422	-0.436455	0.0762577	-1.90833	-0.287282	-0.613425	0.484707	-1.13381
AT1G65900	0.290185	0.471832	-0.350609	-0.304921	-0.419753	-0.0788213	-0.0826209	-0.756756	0.0796538	-1.0055	0.074346	-0.089541	-0.234251	0.657475	-0.645788	-0.217156	-1.05484	-1.31266	-0.0978858	-0.413628	-0.193788	-0.876208	-1.05457	-0.903946	0.217406	0.302542	0.543591	0.0463006	0.0563869	-0.132671	-0.142252	-0.418744	-0.496663	-0.987431	-0.545419	-0.893289
AT1G10640	0.27537	0.534557	-0.722803	-1.07293	-0.624031	-0.302166	-0.892683	-0.325315	-0.0641519	-0.680715	-0.377573	-0.547054	-0.775444	-0.144099	-0.761775	-1.34042	-2.58631	-4.75781	-0.0679719	-0.181475	-0.254031	-0.87409	-1.67432	-1.41099	-0.108699	0.0897676	1.04283	-0.11947	-0.943564	-2.25314	0.503162	0.608765	-0.378274	-0.791396	-0.525518	-1.41793
AT1G08190	0.151566	0.196838	0.155967	0.289816	0.197221	-0.0215301	0.198237	0.0148187	0.0783592	0.0509412	0.148413	-0.0908468	-0.173305	-0.256879	0.310901	0.681157	0.528734	0.215831	0.00298517	0.420957	0.629745	0.487921	0.248418	0.324134	-0.181815	-0.0345934	0.567648	0.928888	0.864588	1.06636	0.0312232	0.409335	0.306198	-0.00363723	0.315715	0.620643
AT1G01900	0.0751159	-0.270742	1.03405	0.409895	0.120834	0.217897	0.117368	0.297124	0.69883	-0.443661	1.06096	0.135215	-0.0718723	-0.00728268	0.441502	0.660997	0.375296	-1.48833	-0.130074	0.427206	1.14688	1.68447	1.41559	0.627269	0.113182	-0.39897	0.605659	0.678893	0.761661	-0.346651	-0.587776	-0.136893	-0.120438	-0.158164	2.89989	1.08796
AT1G71770	-0.509782	-0.278412	-0.322469	-0.0842908	0.014779	0.15016	-0.469298	-0.192995	-0.400155	-0.0110879	0.158561	-0.279298	-0.193721	-0.231455	-1.05673	-0.0880698	-0.305312	-0.398084	-0.241008	0.354738	0.0665181	1.0215	1.10571	0.233294	-0.174638	0.0107264	0.0275507	-0.322495	-0.189465	-0.43634	-0.634587	-0.0456719	-0.433136	0.819683	-0.249623	0.541765
AT1G14440	0.144918	-0.0426515	-0.348144	-0.423334	-0.148135	-0.435863	-0.829466	-0.431785	-2.76876	0.00592483	-0.147265	-0.882448	0.387545	-0.342325	-1.04447	-1.23345	-1.07007	-1.5323	-0.446462	0.42346	1.19652	0.149329	0.70044	-0.410202	0.28754	-0.00717136	-0.320232	-0.220348	0.0961662	-0.432658	0.483336	0.0348354	0.616071	0.271175	0.786871	-0.432441
AT1G28440	-0.219766	-0.294267	-0.0256522	-0.0457733	0.110198	0.00298233	-0.499097	-0.48661	-0.0535089	0.0127166	-0.0597696	-0.0299415	-0.239484	-0.0612841	-0.488832	-0.698673	-0.720491	-0.824202	-0.120192	-0.0961613	-0.446158	-0.445566	-0.694968	-0.472882	0.0609103	0.082774	-0.0847407	-0.0149386	-0.126714	-0.311676	0.0639131	0.240107	-0.498424	-0.872207	-0.688687	-0.676903
AT1G79620	0.440689	0.330672	0.94898	0.823939	0.497672	-0.519162	-0.194111	-0.360671	0.130343	-0.307366	0.432071	0.557336	-0.415772	0.0292998	-0.359004	0.415898	0.338327	-1.09848	-0.711668	-1.00116	0.635011	-0.158946	-0.345744	-0.705063	0.471515	0.202523	0.351552	0.919543	1.31794	0.416882	-0.522411	-0.526578	-0.261725	-1.08317	-0.11989	-0.0613522
AT1G41830	0.420911	0.359724	0.406413	-0.0723824	-0.178785	-0.0805302	0.153751	-0.0855518	0.10682	-0.63832	0.178273	0.0982081	-0.329528	-0.0759877	-0.15446	-0.194025	-0.360776	-0.302303	-0.334685	-0.355204	-0.398777	-1.12957	-1.4261	-0.831303	-0.0211223	-0.197718	0.507205	1.02739	0.827019	1.01803	-0.438544	-0.386362	-0.701457	-1.05669	-0.910656	-0.197886
AT1G01300	0.296814	-0.674422	-0.376573	-0.694149	-0.144345	0.38963	0.11925	-0.269398	-0.35589	-0.333497	-0.0465915	0.294692	0.0271174	-0.400025	-0.625378	-1.19728	-1.73413	-1.88796	0.0297435	-0.538503	-0.800548	-0.876943	-1.6413	-1.17904	0.116019	-0.396482	-0.795521	-0.541698	-0.422631	-0.185228	-0.27473	-0.384478	-1.32413	-2.07583	-1.61884	-1.30102
AT1G26570	0.149593	-0.136621	-0.53995	-0.644055	-0.19968	-0.389288	-0.0942406	-0.180764	-0.28156	-0.551907	0.0776901	-0.280165	-0.0579762	-0.308222	-0.714309	-1.38141	-1.08934	-1.60029	0.198032	-0.106288	-0.43923	-0.331982	-0.0272582	-0.249664	-0.320921	-0.444538	-0.231573	-0.28536	-0.190557	-0.258539	-0.121938	-0.486531	-0.440591	-0.215729	0.224087	-0.0835514
AT1G15000	0.670268	0.311085	0.162786	-0.484238	-0.437405	0.883801	-0.147748	-0.0233006	0.379383	0.222515	0.352059	0.345936	0.359851	0.404054	-0.63771	-0.951774	-1.22117	-1.2691	-0.180318	0.0852289	-0.154954	-0.403268	-0.540793	-0.51333	0.625152	0.353297	-0.381167	-0.667294	-0.9337	0.219391	-0.00629163	-0.0217238	-0.90441	-1.18653	-0.924895	-1.21721
AT1G53300	0.691086	0.46529	0.182024	-0.150578	0.0704929	0.29632	-0.00149287	0.673115	0.252188	-0.34795	-0.0162135	-0.0133756	-0.0313456	-0.0182526	-0.334536	-0.865666	-0.674934	-0.794105	0.354386	0.377893	-0.341082	-0.860758	-1.26291	-1.07944	-0.160338	-0.336041	-0.052721	0.0428045	0.378735	0.274778	0.106702	0.233916	0.539102	0.771288	-0.201734	0.0850896
AT1G53240	0.614558	0.237725	-0.130104	-0.369699	-0.12752	-0.0108593	0.308972	-0.187136	-0.00350399	-0.276363	0.0273839	0.234814	0.512783	0.11565	-0.457451	-1.33266	-1.56338	-1.78866	0.240284	-0.10455	-0.308924	-0.828438	-0.944693	-0.969031	0.212353	-0.0288707	-0.625748	-0.598351	-0.411429	-0.142165	0.00924912	-0.334973	-0.951704	-1.40379	-1.03826	-0.626049
AT2G47240	-0.370783	-0.729374	-0.734888	-0.689586	-0.207615	-0.140489	0.0820867	0.215966	0.122619	0.135149	-0.349103	0.41396	-0.367029	-0.509338	1.03305	0.312112	-0.661284	-0.78577	0.877844	0.242405	0.62961	0.0606908	-0.657462	-0.792616	-0.604675	-0.449067	-0.500214	-0.48991	-0.545657	-0.976375	0.0873966	0.0941109	-0.18907	-0.22512	-0.330223	-0.618756
AT1G51460	-0.0225262	-0.0966655	-0.551352	-0.331833	-0.213578	-0.236772	-0.240533	0.975063	0.0740977	0.209361	-0.754234	-0.253142	-0.371684	0.0270879	-0.418941	-1.11916	-1.04134	-1.04815	0.278473	1.05827	0.231757	0.283345	-0.541068	-0.581117	0.0196817	0.227072	0.0458854	0.0605202	-0.263283	-0.846941	-0.183756	1.04225	0.397449	0.875263	-0.408864	-0.809996
AT1G51570	0.00505992	-0.103694	-0.281027	-0.264885	0.0218348	0.283629	0.0244843	-0.0460438	0.098441	-0.0839099	-0.185829	0.263183	0.12392	-0.0512225	-0.754791	-0.993892	-0.646762	-1.14744	0.313249	0.116403	-0.139636	-0.260189	-0.418636	-0.248769	0.0905593	0.107637	-0.448308	-0.366376	-0.103405	-0.274877	0.156159	0.0681462	-0.358855	-0.912345	-0.724654	-0.66362
AT1G69690	-0.109759	-0.344564	0.355104	-0.117702	-0.144506	0.539845	-0.174414	-0.59719	-0.0198512	-0.0622619	-0.00225295	-0.341528	-0.742696	-0.515043	-1.11777	-1.47519	-0.994854	-1.14584	0.253622	-0.287729	-0.21513	0.0975538	-0.290043	-0.163232	0.0531056	-0.0185652	-0.0713955	0.0741272	0.427686	0.360854	-0.164099	-0.544182	-0.219625	-0.561353	-0.526197	-0.118374
AT1G69295	0.574901	0.105811	0.23475	-0.0826611	0.248705	0.468118	-0.0408172	0.349225	0.167061	0.547341	0.261827	0.114674	-0.0640213	0.0565406	0.904977	1.21623	2.41862	2.2301	0.481288	0.887935	1.3153	1.47694	1.0976	0.865047	-0.153077	-0.113803	1.19795	0.783333	1.52763	1.91788	0.286283	0.604093	0.851578	0.90924	0.994635	0.773976
AT1G80310	-0.310411	0.375911	0.523082	0.486216	0.363763	0.765814	-0.727142	-0.583977	-0.0200149	-0.0168701	-0.0250099	0.189863	0.112821	-0.0679041	0.866687	1.21186	1.28178	2.93807	-1.00141	-0.919373	-0.556963	-0.00883118	-0.0198276	0.539748	0.344664	0.488371	0.665742	0.430091	0.821661	1.29078	-0.455703	-0.343759	-0.550417	-0.781083	0.0946109	0.157989
AT1G68400	-0.417016	-0.0113062	0.16586	0.0501761	-0.0452907	0.570677	-0.366109	0.141258	0.0841497	0.142753	0.230014	0.0209013	-0.279313	-0.0558881	-0.794936	-1.31486	-1.07978	-1.41342	-0.144262	0.0341416	-0.846487	-0.701639	-0.75494	-0.697883	-0.245709	0.144697	-0.197138	-0.373484	-0.18266	-0.0985748	-0.0692312	-0.00526928	-0.280776	-0.0949418	-0.411142	-0.477763
AT1G72290	-0.597035	-0.156119	-0.433798	-0.430435	-0.163746	-0.554266	-0.620991	-0.343074	-0.185111	-1.00605	-0.00803732	-0.291135	-0.272685	-0.291049	-0.374603	-0.835189	0.107357	-0.632268	0.379009	-0.015348	-0.0855757	-0.257011	0.378512	0.185303	-0.357427	-0.656046	-0.122484	0.148323	0.0245571	-0.129768	-0.930535	-0.249359	1.21373	0.104758	-0.263034	0.290838
AT1G64390	2.23755	0.92346	-0.120658	-1.13287	-0.0411669	-0.174503	-0.0852114	-0.670519	-1.05166	-0.253656	-0.0313269	-0.449882	0.0919616	0.815637	0.427507	-1.09906	-1.46456	-3.19555	0.474041	0.34345	-0.881636	-1.2535	-2.42515	-2.08253	0.809598	0.724618	1.60987	0.825212	0.252041	-0.656052	0.380315	0.767224	0.162655	0.017308	-1.43319	-0.693365
AT1G55260	0.158461	-0.142634	0.495369	-0.514232	-0.221082	0.0592406	-0.0685617	0.460731	-0.188745	0.282505	-0.71446	0.125325	-0.112521	-0.194628	-0.444964	-1.12045	-1.13533	-1.22048	0.462129	0.464189	-0.296444	0.938065	0.234683	0.0660623	-0.0102829	-0.0151599	0.322571	-0.170451	-0.0636158	0.0728873	0.0382418	0.439592	-0.713743	-0.739949	-0.126357	-0.724881
AT3G07540	0.1973	0.467494	-0.122074	0.416067	0.205128	0.811517	-0.476514	0.392614	-0.11571	0.614323	-0.104814	0.0542663	-0.414213	0.0563079	-1.35045	-1.65737	-1.59712	-1.83123	-0.00802758	-0.131479	-0.703517	-0.278311	-0.472388	-1.05699	0.144734	0.163607	-0.9966	0.117038	-0.4324	-0.554661	-0.131177	0.542009	-0.868237	-1.36549	-0.550853	-1.3908
AT3G10080	-0.224382	-0.474721	0.0934698	0.0375728	-0.0774883	-0.108429	-0.0724369	-0.759206	-0.123075	-0.0800943	0.166032	0.746733	-0.465075	-0.202239	-0.681206	-0.57586	-0.917805	-2.30909	-0.140595	-0.465255	-0.171325	-0.708091	-0.910917	-1.24942	-0.119	-0.00849241	-0.171388	-0.0280337	-0.211881	-1.31961	-0.128728	-0.572376	-1.62283	-1.30149	-0.875217	-1.10818
AT3G05600	0.0880152	-0.240046	-0.913136	-0.236269	-0.279033	-0.145547	-0.504117	-0.577798	0.323096	0.350977	-0.0730777	-0.704378	-0.591825	-0.236227	-1.2533	-1.64084	-2.31733	-3.40808	0.99949	-0.602512	0.0740006	0.447377	0.485897	-0.0464321	-0.133277	-0.322016	0.200322	0.645995	0.385015	-0.488185	0.154653	-0.433627	0.227557	0.722466	0.438956	-0.44889
AT3G02110	-0.233894	-0.400211	-0.262145	0.0175417	-0.162267	-0.00823567	0.132197	0.346368	0.0777318	0.12599	-0.358266	0.235512	-0.355964	-0.288058	-0.957904	-1.46455	-1.85687	-2.45252	0.653414	0.290726	-0.0446949	0.346459	-0.0798898	0.0537762	0.10143	-0.112243	-0.375976	-0.474374	-0.578262	-1.14205	0.106049	0.412681	-0.022958	-0.137802	-0.182286	-0.767845
AT3G08680	-0.0445899	-0.188159	0.0468948	-0.196899	-0.116913	0.154588	0.0146924	-0.126632	0.090086	-0.265856	-0.0484367	0.118764	-0.257144	-0.349222	-0.795288	-1.48107	-1.59316	-1.62964	-0.123891	-0.254036	-0.733678	-0.847345	-1.13172	-0.871495	-0.0181383	-0.186315	-0.21793	-0.0588956	-0.052664	0.165206	-0.136421	-0.289163	-0.602801	-0.528472	-1.0527	-0.901448
AT3G08770	0.205848	0.255073	-0.435014	-0.581952	-0.193102	-0.352022	0.068181	0.687093	-0.24089	-0.192332	-0.606484	0.13983	-1.39906	0.261438	-0.464922	-0.894263	-0.922518	-2.96353	0.560334	0.681916	-0.394703	-0.300354	-1.42866	-1.60657	0.0999349	0.165508	0.0860846	0.571142	0.143888	-1.01246	-0.303774	0.528468	-1.08097	-2.74837	-1.80101	-2.13566
AT3G04290	-0.154129	-0.645775	-0.270652	-0.420679	0.153213	-0.179992	0.00264958	2.33696	-1.14487	-0.174498	-0.191059	0.286118	-0.377673	-0.334167	-1.67221	-2.2452	-2.82857	-5.12839	0.872539	2.13124	-0.0742424	0.994918	0.330541	1.91802	0.107242	-0.328475	-0.632973	-0.228864	-0.360899	-0.984409	1.60777	1.09954	-0.755462	1.53542	-0.0274095	1.34318
AT3G14240	-0.345191	-0.274013	0.397356	0.107455	0.31612	0.417285	-0.0324003	0.319052	0.438554	0.303558	0.237624	0.142939	-0.194972	-0.286349	-1.28679	-1.64802	-1.73937	-2.81429	-0.347732	-0.116196	-0.40947	-0.372484	-0.543559	-0.705356	-0.494156	-0.0405787	-0.9984	-0.791584	-0.358881	-0.355316	-0.150302	0.343196	-0.611811	-1.29345	-0.880236	-0.647998
AT3G16060	0.0168327	-0.0547421	-0.0153325	-0.0470535	0.00785356	-0.328251	-0.0610143	-0.115603	-0.159096	-0.260021	-0.195063	0.0662864	-0.176766	-0.173451	-0.192033	-0.201111	-0.449726	-0.528514	0.0289992	0.162414	0.0155985	-0.430778	-0.783946	-0.585702	-0.173197	-0.040131	0.339965	0.476644	0.452131	0.28045	0.0641263	0.0217429	-0.49027	-1.19826	-0.920681	-0.677019
AT3G17840	0.70975	0.29544	0.227013	-0.216908	0.0354475	0.716932	0.37822	0.324765	0.117016	0.162195	0.237388	0.517416	0.167514	0.366025	-0.85919	-1.30377	-1.72055	-2.09632	0.281898	0.204771	-0.598687	-0.576593	-1.08245	-1.20869	0.447762	0.0711407	-0.216142	-0.0872125	-0.0659132	0.119998	0.335529	0.266498	-0.310726	-0.232862	-1.15054	-1.30974
AT3G21190	-0.0573033	-0.149181	0.00201109	-0.205013	0.138583	-0.107651	-0.192527	-0.803583	-0.295501	-0.471556	0.137605	0.0425999	-0.495806	-0.33629	-0.81864	-0.650428	-0.853421	-1.96845	-0.174986	-0.600149	-0.520669	-0.950127	-1.05433	-0.978611	-0.0787661	-0.149591	-0.0929082	0.790972	0.669709	0.496595	-0.134815	-0.507407	-0.6237	-1.4876	-1.08062	-1.08204
AT3G21750	0.899865	0.570612	1.1005	0.353624	-0.000461469	0.415669	0.200271	0.35078	0.712037	0.494574	0.116545	0.255476	-0.149705	0.548928	1.29731	1.25109	0.597872	1.62259	0.613544	1.10148	1.52619	1.64226	1.05063	0.971589	0.221318	0.522799	0.714165	0.348837	0.0639084	1.12583	0.420279	0.823953	0.493613	0.431105	0.686657	1.22181
AT3G19820	0.340134	0.0204526	0.308903	0.199687	0.299683	0.474418	0.150121	-0.245255	0.0665383	0.0101128	-0.0524714	0.186715	0.105794	-0.229798	-0.770614	-1.77079	-1.82199	-2.30675	-0.0163382	-0.0792359	-0.220507	-0.87756	-1.02559	-0.590369	0.047322	-0.0329941	-0.496059	-0.473867	-0.0973192	0.0723988	0.226855	0.074654	-0.831883	-1.79817	-1.5503	-1.08125
AT3G27020	-0.0191668	0.0416234	0.211066	0.442351	-0.0203747	0.0117306	-0.388934	-0.170978	-0.086102	-0.0750965	-0.307733	0.0929043	-0.118814	0.043215	0.519237	0.970869	0.458896	0.615642	-0.00245269	0.401272	0.437412	0.386567	0.0859772	0.500076	0.197087	0.236593	0.392747	0.201336	-0.207449	0.0486279	0.0112501	0.332569	-0.479783	-1.11596	-0.229912	-0.0708449
AT3G18490	0.607824	0.726544	1.01131	0.600202	0.102522	0.53204	0.0593356	0.731961	0.485066	0.666768	-0.255157	0.21384	-0.116871	0.317306	0.482132	0.92533	-0.0309632	-0.708294	-0.211226	0.585881	0.394913	1.02423	0.395967	-0.0179248	0.360977	0.585007	0.69618	0.821147	0.449552	0.255326	-0.0322582	0.677224	-0.436071	-0.384728	0.16955	-0.0347882
AT3G26140	-0.308037	-0.782837	-0.437521	-0.581431	-0.833965	-0.063629	0.229646	-0.801294	0.266727	-0.65501	-1.70012	-0.332689	0.0460851	-0.141014	-0.764149	-0.790365	-0.291515	-0.5227	0.329023	0.237266	0.183722	-0.452752	0.566611	-0.206451	-0.559788	-0.0491769	0.229785	-0.299871	-0.368409	-0.37183	-0.576966	-0.700673	-0.102443	-0.0398608	-0.108972	-0.47274
AT1G55360	-0.276185	-0.322582	-0.0855417	-0.179696	-0.107909	0.0332159	-0.0607274	-0.178898	-0.060393	-0.129152	-0.0572241	0.00859594	-0.219999	-0.308448	-0.797458	-0.734787	-0.892781	-1.52324	-0.0754132	-0.376588	-0.878787	-1.01947	-1.02644	-0.965793	-0.278394	0.0864096	-0.253881	-0.39632	-0.47147	-0.564749	0.211727	-0.139083	-0.892019	-1.2976	-1.18803	-1.12911
AT3G15095	-0.212028	-0.277232	-0.236438	0.206611	-0.207155	0.250403	-0.0887893	0.0285006	0.0622708	-0.0431226	-0.337481	0.157404	-0.299928	-0.235051	-0.944955	-0.311172	-0.434228	-0.732692	-0.0802062	0.236676	-0.119078	-0.142321	-0.420193	-0.294164	0.217416	0.133889	-0.212561	-0.136068	-0.117171	-0.174476	0.0059194	0.0966519	0.243039	-0.135767	-0.762885	-1.16683
AT3G14067	0.625199	1.19244	1.17937	0.58862	0.21315	0.787969	-0.0945403	0.129369	0.304192	0.156776	-0.297435	-0.0820927	-0.224232	0.452831	1.83078	2.69455	1.84698	2.22661	-0.471401	0.306588	1.07663	1.16777	0.948658	1.02315	0.352301	0.703712	1.90289	1.22713	1.04598	1.26457	0.000286435	0.541823	0.0312813	-0.814959	0.697265	0.570018
AT3G13510	-0.0998107	-0.190096	0.0722906	0.0137118	-0.0482938	0.135005	-0.274285	-0.15061	-0.0929377	0.15799	-0.117684	0.288743	-0.170406	-0.223967	-0.426719	-1.12131	-1.83062	-2.092	-0.190182	-0.277651	-0.505876	-0.367885	-0.868327	-0.4784	0.0175327	-0.032459	-0.188875	-0.565057	-1.13271	-0.759567	0.0242246	-0.0604496	-0.691132	-0.59021	-0.712782	-1.08351
AT3G18850	0.124427	0.0248747	-0.36473	-0.401631	-0.452392	0.212387	0.0682931	-0.220469	-0.232693	-0.161767	-0.197493	0.174498	-0.205885	0.211327	-0.882551	-0.583737	-0.617489	-0.95262	0.261784	0.498568	-0.151023	0.14975	0.1066	0.0601422	0.238202	0.559689	0.156965	0.390956	0.2401	0.109773	-0.185798	0.0423415	-0.337267	0.345209	-0.079248	-0.179088
AT3G20015	-0.261688	0.099153	-0.240305	0.00251468	-0.136313	0.310755	-1.10077	-0.696073	0.312076	0.156703	0.500443	0.0442932	-0.710446	0.369811	-0.541769	-0.965699	-1.25895	-1.00374	-0.831025	-1.2751	-0.938146	-0.255163	-0.630044	-0.543901	0.133023	-0.0520798	-0.121495	-0.249278	-0.608863	-0.447232	-0.761344	-1.25699	-3.09414	-3.26098	-1.44732	-2.39074
AT1G30330	-0.129427	-0.532376	0.172561	-0.202019	0.0824032	0.0378341	-0.093379	-0.515262	-0.0635681	-0.138442	-0.0806983	-0.164177	-0.333075	-0.47057	-0.149042	-0.390268	-0.136222	-0.293051	0.2028	-0.454461	-0.678267	-0.649864	-0.783466	-0.835903	0.185213	-0.321668	-0.25246	-0.276464	-0.131177	-0.11029	-0.194568	-0.582163	-0.927457	-1.4099	-0.878114	-0.764308
AT1G07080	0.191485	-0.00781645	0.231684	0.28107	0.247787	0.55076	-0.000643751	-0.139066	0.277926	-0.0799271	-0.0686428	-0.314958	0.0345878	-0.272479	0.426292	0.972446	0.794554	0.736827	-0.0168316	-0.0741749	0.214181	0.414631	0.1909	0.263661	0.117138	0.0204329	0.468357	0.524315	0.603184	0.737738	-0.254827	-0.293102	-0.205859	-0.379026	0.0924082	-0.230315
AT1G58360	0.115562	0.494037	1.16387	0.907897	0.498612	0.199343	-0.295051	0.912046	0.0909328	0.842961	-0.412484	-0.00952688	0.149556	0.374163	0.636272	2.15687	2.74595	2.41359	-0.14272	1.54618	1.29584	2.18744	1.66958	2.15493	0.072559	0.121585	0.575368	2.12851	1.85167	1.94468	0.122841	1.4771	1.90356	2.12499	1.86244	2.20715
AT1G67040	-0.158417	-0.0753477	-0.231747	-0.55134	-0.0626319	-0.379036	-0.548923	0.141397	-0.685572	0.410104	-0.235655	-0.0338493	-0.385401	-0.0195983	-0.747447	-2.02637	-0.306108	-1.32226	0.240393	0.152462	-0.699444	0.438897	0.0409853	-1.07446	-0.0952757	0.130966	0.00198787	-0.461743	0.391736	-0.430179	0.168741	0.587003	-0.646656	-1.71491	-0.265734	-0.418645
AT1G19920	0.16526	-0.0217203	-0.0595264	-0.191586	-0.230391	-0.670362	-0.30624	-0.442798	-0.0522669	-0.0796571	0.0566916	-0.063757	-0.0855437	-0.0576777	-0.676904	-1.01622	-1.54342	-1.72647	-0.370387	-0.440665	-0.751408	-0.67223	-0.649647	-0.62125	-0.0242023	-0.0372293	-0.384081	-0.0664022	-0.612958	-0.479063	-0.495349	-0.50992	-0.650466	-0.690209	-0.655793	-0.380938
AT4G00430	0.144102	0.116061	0.0075157	-0.0588366	-0.03417	0.0698549	-0.391102	0.225165	-0.108051	-0.138677	-0.132823	-0.155856	-0.311821	-0.272152	0.275712	0.318847	0.709861	0.564032	-0.0546791	1.00335	0.465136	1.24788	0.863545	0.734078	-0.0357039	0.0305091	0.432953	0.456164	0.369316	0.526298	0.0853453	0.453432	0.0720659	0.160233	0.966596	0.709188
AT4G00740	0.344328	-0.036146	0.140657	0.234586	0.328895	0.0265882	0.0341245	-0.270097	0.0930416	-0.159136	0.225635	-0.0182881	0.180136	-0.0200705	-0.141993	-0.42414	0.0772146	-0.406355	-0.170659	-0.111585	-0.437882	-0.888347	-0.713787	-0.602239	0.37933	0.0131956	-0.219389	-0.0105122	0.435193	-0.0546366	0.10704	-0.138865	-1.23643	-2.18592	-1.28976	-1.50909
AT4G02680	-0.0524951	-0.36831	-0.178959	-0.0119461	-0.0375707	-0.0564243	-0.0889855	-0.162729	-0.294219	-0.0268325	-0.20677	0.0108373	0.0195222	-0.399745	-0.583782	-0.321941	-0.673476	-0.782795	-0.234871	-0.552668	-0.840766	-0.832307	-1.16078	-0.93726	0.133647	-0.196267	-0.265635	-0.106784	-0.152331	-0.53465	-0.0484322	-0.301213	-1.28947	-1.80381	-1.22961	-1.21564
AT4G04890	0.460354	0.0851337	-0.149665	-0.117655	-0.0270852	0.2475	0.46281	0.442083	0.283509	-0.468644	-0.131722	0.134164	-0.0869747	-0.103476	-0.157134	-0.731626	-0.73938	-0.942582	0.219141	0.105757	-0.374423	-0.103134	-0.986782	-1.03579	0.195771	0.445969	0.0438684	0.0555045	0.0564328	0.0444888	-0.0209683	-0.00688554	-0.440048	0.0128853	-0.616949	-0.846685
AT4G22130	0.308533	0.145061	0.303932	-0.0122107	0.159389	0.0383774	-0.139773	-0.122569	-0.237472	-0.276176	-0.0569416	0.0636256	-0.036731	-0.150167	-0.418038	-0.843064	-0.742034	-1.29217	-0.309599	-0.128672	-0.681204	-0.87743	-1.33836	-1.27146	0.0192053	-0.18129	-0.207158	0.187848	0.523101	-0.129685	-0.196743	-0.0721332	-0.0672087	0.39303	-0.872448	-0.568688
AT4G23490	0.511584	0.45726	-0.319215	0.167163	-0.324461	0.154468	-0.165928	-0.266853	0.0217853	-0.52478	-0.275735	-0.252075	-0.0944741	0.250598	-0.11935	-0.361868	-0.964651	-0.760158	0.0813927	-0.210838	-0.0769337	-0.423189	-0.713856	-0.227471	0.22281	0.0599342	0.436794	0.684429	0.160149	0.579361	-0.216065	-0.279584	-1.01889	-1.49228	-0.790176	-0.903041
AT4G29030	-0.0532913	0.0362074	-0.368348	-0.745542	0.0276095	-0.96355	0.413992	0.670799	0.526679	0.528001	0.809986	0.435743	-1.11338	0.0346385	-0.63534	-1.44125	-1.4865	-2.51899	0.0587264	0.677942	-0.394704	0.0547978	0.321006	-0.303845	-0.311782	-0.142072	0.0312915	-0.0190935	0.426371	-0.824223	1.2578	0.715035	-0.373605	-0.953498	1.0576	0.432717
AT4G29130	0.547062	0.342035	0.778143	0.269696	0.31416	-0.0346844	0.0233637	-0.0955329	0.00589081	0.0706947	-0.113893	0.240099	0.0593242	-0.00108241	0.734686	0.785999	0.453726	0.239055	0.0336641	0.0347736	0.0273399	-0.457191	-0.658845	-0.22407	-0.0374669	0.0345008	0.445776	0.570731	0.561783	0.701904	-0.00736878	-0.0649111	-0.113105	-0.500622	-0.671341	-0.334074
AT4G29680	0.0227764	-0.18305	-0.0151401	0.0558798	0.384114	-0.0813442	-0.0367471	-0.320751	-0.211257	-0.266554	-0.123708	0.15752	-0.512906	0.0529302	-0.183194	0.133673	0.0613598	0.146541	-0.227834	-0.30653	-0.39869	-0.661256	-0.860818	-0.734419	-0.110022	0.156383	0.0449514	0.0746093	0.293778	0.462978	-0.09441	-0.138317	-0.84807	-1.51032	-1.03833	-0.775011
AT4G29720	0.270899	0.15571	0.191297	-0.305432	-0.0473843	0.121502	-0.620712	-0.524075	-0.301997	0.184038	0.199712	0.0461046	0.229812	-0.240918	-0.366363	-0.629417	-1.08536	-0.972274	0.237868	-0.541356	-1.04938	-0.797329	-0.753216	-0.514946	0.344499	0.0135379	-0.107969	-0.254932	-0.396801	-0.448554	0.404484	-0.279229	-0.433347	-0.656493	-1.25229	-1.01444
AT4G34980	0.402515	-0.0373379	0.278878	0.13467	0.185482	0.68822	-0.0995477	-0.0127815	0.138525	0.0708751	0.252265	-0.025715	-0.30314	-0.0668059	-0.445042	0.16156	-0.000985184	-0.285183	-0.22688	-0.570788	-0.489063	-0.907718	-1.48026	-1.10021	0.215338	0.283814	0.107016	0.319742	0.207009	0.258065	-0.359871	-0.531929	-1.32163	-2.10663	-1.17101	-1.86111
AT4G36360	0.661551	0.366807	0.661468	-0.335395	0.0284419	-0.0300618	0.338903	0.0203468	-0.231491	-0.139948	0.0378396	-0.125315	0.11222	0.182961	0.212013	-0.362625	-0.23475	-0.889891	0.274912	0.22121	0.637639	0.368882	-0.487432	0.0748427	0.366076	0.263771	0.460563	0.533257	0.540871	0.451343	-0.0150337	0.278263	-0.105018	-0.811582	-0.233339	-0.120405
AT4G36250	-0.00994387	-0.240666	-0.019596	-0.328349	-0.24478	-0.155863	-0.00339538	0.289192	-0.120792	-0.181775	-0.41665	0.187382	-0.0774963	-0.240095	-0.130693	-0.331101	-0.838647	-0.743239	0.148315	0.357725	0.0659021	0.397006	-0.105132	-0.282108	-0.144457	-0.00908773	0.12981	0.104749	-0.276558	-0.110049	0.00487535	0.248656	-0.304296	-0.178223	-0.412653	-1.15288
AT4G38220	0.26161	0.116495	0.45864	0.0853732	0.333818	0.100766	-0.0252993	-0.182042	-0.0792894	0.0047845	-0.0821058	0.13943	0.314206	0.263099	0.0994084	0.129423	-0.00266883	-0.534299	-0.180709	-0.132685	-0.113783	-0.262536	-0.203419	-0.112226	0.0572897	0.304244	0.0634489	0.292858	0.0673216	-0.0791934	-0.10349	-0.121382	-0.594525	-1.31204	-0.449879	-0.502559
AT4G38250	0.314313	0.262879	0.366842	0.470143	0.271773	0.362202	-0.150418	0.129094	-0.0579974	-0.220221	0.135094	-0.0262477	0.107658	-0.0187172	-0.0666865	0.308336	0.201564	0.515543	0.0190035	0.122559	0.208846	0.0732244	0.506049	0.589999	0.237516	0.212435	0.154941	0.473244	0.404501	0.964251	0.10846	0.423029	0.0948247	-0.0390415	0.712746	0.889756
AT4G38660	0.389759	0.129265	0.264882	-0.22005	0.0116537	0.0339239	0.304737	-0.00911445	0.225909	0.131606	0.208685	0.236397	-0.15845	-0.125356	-1.57812	-2.49311	-3.5679	-3.62475	0.19731	-0.298273	-0.862899	-1.37198	-2.2078	-1.93805	0.233693	0.0252184	-1.01048	-0.615973	-0.692387	-0.8807	0.105845	-0.177728	-0.698734	-1.32247	-1.55004	-1.7876
AT4G39330	1.00756	0.565151	-0.026445	-0.548714	-0.105798	0.0727004	0.094675	1.16181	0.0847322	-0.387383	-0.336862	0.0652813	-0.163712	0.0628651	1.14121	0.679979	0.268473	-0.221091	0.188586	0.911434	1.18592	1.11176	-0.103058	-0.414215	0.288029	0.288793	1.28098	1.12537	0.453252	0.440742	-0.0978094	0.89496	-0.121037	-0.212847	0.191919	-0.539627
AT3G49670	0.414674	-0.845275	-0.0116965	-0.315319	0.0612226	-0.111483	-0.31367	-0.519705	-0.145811	-0.144317	-0.117268	-0.034552	-0.561308	-0.467784	-1.16808	-2.23328	-2.99056	-3.70674	0.124019	-0.1164	-0.909639	-0.661714	-1.15328	-0.64056	-0.141744	-0.0746697	-0.681227	-0.887848	-0.665852	-1.02166	-0.102553	-0.0798451	-0.728433	-0.857423	-1.1084	-0.88553
AT3G51950	0.23938	0.0570946	0.0818417	0.0436381	0.078485	0.327152	-0.555724	-0.531853	-0.191465	-0.151465	-0.227079	-0.676045	-0.161175	-0.0593952	-0.527037	-0.512979	-0.439896	-0.519757	-0.300303	-0.615918	-0.673723	-0.861409	-0.513495	-0.78679	0.174148	0.126504	0.0916849	-0.233737	0.017444	-0.0946951	-0.515008	-0.300602	-0.835229	-0.626067	-0.416597	-0.88736
AT3G56370	0.563892	0.282522	0.275999	-0.252348	-0.218257	-0.246643	-0.079979	0.248808	0.113254	-0.108093	-0.136077	0.0933132	-0.357942	-0.150287	-0.768646	-1.62823	-2.08432	-3.07987	-0.0444719	0.391973	-0.205803	-0.605008	-1.39199	-1.70386	0.0624354	-0.112305	0.224876	0.00731814	-0.119822	-0.461575	0.086978	0.501304	-0.386011	-0.503286	-1.49232	-1.63019
AT3G59420	0.40105	0.0860833	0.63928	-0.0579997	-0.399624	-0.759417	-0.372538	0.0624887	0.206203	-0.409321	-0.445786	0.209398	-0.243399	-0.312238	-0.430571	-0.323089	-0.322858	-1.40783	0.33542	0.752843	-0.0243525	-1.05845	-1.85249	-1.9006	0.131462	-0.498377	0.589699	0.259937	-0.0208702	-0.538885	0.0986552	0.371573	-0.233373	-1.13277	-1.67455	-1.28335
AT3G59140	0.00654015	-0.164875	-0.325779	-0.260792	0.604672	0.570794	-0.0498737	-0.0446969	0.782283	-0.0449686	-0.113832	0.933933	0.0659273	-0.256586	0.560951	-0.172963	0.529418	0.484197	-0.0753555	0.666225	1.62537	0.350219	-0.242658	0.108236	0.184877	0.160098	0.0302555	0.164748	0.339629	0.70262	0.0697132	0.0387801	1.25635	0.7194	0.199783	0.640543
AT3G61820	1.04054	-0.0925087	0.722485	-0.0597902	0.00131854	0.558677	0.213156	0.0552709	-0.0010071	0.323948	-0.0178028	0.25081	0.0398536	-0.0818292	-0.429269	-0.778157	-0.933683	-1.07736	0.00161582	-0.0340774	-1.3228	-0.520167	-1.77333	-1.30938	0.210807	-0.0285483	0.00849444	-0.088896	-0.214929	-0.290697	-0.150817	0.197686	-1.26216	-0.978412	-1.13628	-0.628308
AT5G01090	0.22092	0.0684254	-0.122598	0.069537	-0.0173396	0.20393	0.238153	0.0558363	0.131735	0.24698	0.168	0.0658678	-0.151529	-0.146822	-0.783291	-0.674363	-0.733355	-0.930884	0.218659	-0.00200429	-0.424815	-0.159367	-0.0252073	-0.0314166	0.0492202	0.140632	-0.212266	0.0291777	-0.0545952	-0.0263368	0.102183	0.0405745	-0.396724	-0.3338	0.0546388	-0.400351
AT5G01020	-0.0547069	-0.0784775	0.10033	0.290085	0.079457	0.226863	0.0703812	0.168979	0.287173	-0.0293366	-0.132851	0.155246	-0.238747	-0.168794	-0.332482	-0.455372	-0.278081	-0.938723	-0.397561	0.0624104	-0.0963907	-0.48891	-0.374835	-0.360986	-0.0352743	0.214192	0.119432	-0.0980677	0.362767	-0.0348562	-0.0315018	0.217697	-0.373551	-0.965441	-0.786432	-0.685377
AT5G01890	0.826781	0.254105	0.766456	0.00565435	0.131323	0.142552	0.232728	0.516782	0.57489	0.166753	0.274	0.163811	0.378384	0.0616877	-0.481137	-1.16817	-0.732291	-0.79762	-0.0203595	0.201929	-0.023459	-0.335096	-0.715055	-1.21022	0.405932	0.0993362	0.380415	-0.0162482	0.199047	0.143091	-0.155444	0.37385	-0.318541	-1.0953	-0.993224	-1.40627
AT5G03170	-0.0926313	-0.232588	0.0570406	-0.135724	-0.00209999	0.379793	-0.220465	-0.69883	-0.0399227	-0.879769	-0.277793	0.0104088	-0.135529	-0.0728913	-0.199852	0.0838118	0.250019	-0.024214	-0.27816	-0.167135	0.0130658	-0.429419	0.140632	0.678123	0.224997	0.1126	0.387091	0.442842	0.431705	0.463782	0.123206	-0.489089	-0.702979	-0.557796	0.388745	0.430958
AT5G07030	0.683562	0.450563	0.931087	-0.0194219	0.102412	0.571712	0.455667	0.15967	0.737112	-0.331985	0.275457	-0.181517	-0.475058	0.302449	-0.251723	-0.988724	-1.11095	-2.01973	0.254115	-0.122124	0.1177	-0.786334	-1.61493	-2.18043	0.608017	0.204853	-0.00625084	-0.0136362	0.0796122	0.52555	-0.178545	-0.142138	-0.795137	-1.53968	-0.460432	-1.48108
AT5G07180	0.241445	0.682759	1.02185	0.605874	0.736599	-0.172301	-1.4011	1.14585	-0.608232	0.0692627	-0.508612	1.19176	-0.698596	0.236573	-0.51856	-0.739109	-3.91056	-3.29361	0.0549665	0.145851	0.860764	0.495527	0.891476	0.978626	-0.112406	0.253717	0.348857	0.657034	0.952165	-1.06496	-0.285621	-0.554589	-0.210897	0.902153	-0.275634	-0.462972
AT5G07800	-0.237643	-0.180031	0.23659	-0.156253	-0.11065	0.027906	-0.0251456	-0.631247	-0.249139	-0.0940199	0.178632	-0.0354856	-0.394386	0.0380084	-0.191202	-0.171043	-0.20223	-0.439975	0.15985	-0.409888	0.402982	0.204325	-0.279109	0.288634	-0.014855	0.0169706	0.407202	0.442603	-0.117648	0.0645255	-0.410371	-0.223123	-0.00161511	-0.640818	-0.0504952	0.296767
AT5G08000	0.225131	-0.0531982	-0.328394	-0.498029	-0.0969252	0.00134552	0.378816	0.882239	-0.116892	-0.108401	-0.637138	-0.469355	-0.51868	0.075443	-0.627243	-0.817629	-1.10991	-1.70426	0.797846	0.487806	-0.392583	0.70017	0.429047	0.00643683	-0.0126992	0.0286418	-0.0831056	-0.299481	0.182737	0.0933151	-1.09727	0.805858	-0.384464	0.639215	-0.200658	-0.0936301
AT5G09760	0.525958	0.496405	-0.0819903	-0.265376	-0.116875	-0.0494713	0.168326	0.303622	0.0311536	-0.682376	0.237408	-0.0376845	-0.164256	0.144567	-0.114503	-0.815607	-1.18436	-1.10568	0.207621	0.154475	-0.457651	-1.01698	-0.865956	-0.993037	-0.0822899	0.0707353	-0.00507099	-0.335157	-0.417549	-0.455884	-0.160037	-0.4089	-0.733885	-0.942983	-0.541169	-1.09218
AT5G10930	1.46875	1.09569	0.315638	0.0361433	-0.53907	0.388443	-0.638865	-0.055744	0.0219379	0.252378	0.372666	0.113527	-0.355464	0.790085	2.48398	2.93179	2.42332	1.54246	1.05917	2.10756	1.74954	1.24509	0.877904	1.32302	0.786765	0.449388	2.60217	2.3306	1.22295	1.05539	0.714756	1.39964	1.14789	0.531282	1.20432	1.06856
AT5G13640	-0.237065	0.0454068	0.275422	0.426305	0.229524	0.0301716	-0.260898	-0.138413	-0.0890039	0.189168	-0.0363077	0.11895	-0.179009	-0.126115	-0.0163785	0.649238	0.249475	0.100585	-0.103564	-0.000169506	-0.112952	-0.0342052	-0.221343	0.0917017	-0.0877991	0.0499262	0.368878	0.407997	0.0050992	-0.426951	-0.154676	-0.0625236	-0.45165	-0.706504	-0.26758	-0.148886
AT5G22860	0.0160895	-0.238471	0.734306	0.450806	-0.054477	-0.12684	-0.15778	-0.15521	1.09116	1.35192	0.123395	0.241905	-0.349501	-0.345159	0.800759	1.96232	2.69719	2.82029	-0.360083	0.358643	2.01202	2.11499	1.7862	3.94346	0.422461	-0.0746192	0.590879	1.53618	0.885519	1.84424	0.0257117	0.851142	1.37034	1.85752	1.91939	3.46717
AT5G23940	0.396458	0.318913	-0.0583326	-0.44598	-0.359739	-0.039124	-0.143773	0.383075	-0.25091	-0.431493	-0.265201	-0.0642055	-0.762706	0.407058	-0.741593	-1.12199	-1.55925	-2.11883	0.683716	0.580811	0.128495	0.105504	0.0928194	0.677245	0.208892	0.402666	0.237324	0.54673	0.152728	0.00606701	0.0504912	0.406722	0.143131	0.472147	0.211082	0.163853
AT5G40150	0.418323	0.228249	-0.11633	-0.625306	-0.315836	0.181845	-0.25528	-0.276312	-0.166781	-0.412205	-0.0553753	-0.097044	0.212746	-0.217306	-1.17914	-2.21967	-2.37453	-2.49718	0.253905	0.217868	-0.595677	-0.979072	-0.795814	-1.12693	0.137227	-0.266296	-0.282256	-0.273517	-0.157231	-0.109639	0.0799172	-0.111978	-0.234596	-0.253671	-0.613856	-0.86528
AT5G41870	0.886726	0.34377	0.47435	0.105056	0.124929	0.430012	0.000861825	-0.205162	-0.0663874	1.2306	0.336995	0.476183	0.0295684	0.36264	0.0573802	0.51816	0.585237	0.495914	-2.40031	-2.1469	-1.27069	0.22609	0.422283	0.107207	0.226145	0.109742	0.442287	-0.14426	0.46239	0.687154	-0.28134	-0.768977	-1.37022	-1.66793	-0.57098	-2.13514
AT5G43020	-0.075506	-0.0140262	0.109911	-0.242285	-0.0838123	0.168639	0.121256	-0.15295	-0.0829274	-0.698437	-0.148489	-0.00931203	-0.767977	0.278546	-0.927466	-0.845988	-1.05198	-1.43772	0.41984	0.286108	-0.988104	-1.39571	-1.45254	-1.65743	0.025743	0.0688129	-0.147566	0.0771738	-0.214364	-0.443547	0.344503	0.0935393	-0.591201	-0.233994	-1.56175	-1.17009
AT5G45670	0.0924355	-0.0975737	-0.735828	-0.298146	-0.0454917	-0.135739	-0.0807096	1.16375	-0.762308	-0.232603	-0.369025	0.0199556	-0.664488	-0.399361	-2.08749	-3.66812	-3.29144	-5.11754	-0.0283918	0.337512	-1.32306	-1.55829	-2.45355	-3.04131	0.0127327	-0.291704	-0.532997	-0.770212	-0.999808	-1.97688	-0.383312	0.719982	-1.04046	-0.561536	-2.03759	-3.14131
AT5G47640	1.6103	2.63395	-0.0243182	0.11176	-0.473685	0.422408	0.0728045	0.48118	-0.0688664	-0.122632	-0.135647	-0.0310968	-0.248454	1.83389	2.6418	1.9027	0.87061	0.512944	2.05713	2.90013	1.83887	1.31521	1.20007	0.482547	0.204507	1.50618	2.85141	1.43852	1.14027	0.712633	1.92704	2.32826	2.65667	2.65391	1.74133	0.86732
AT5G47780	-0.732124	-0.822543	0.00820174	0.187798	0.0081847	0.0330583	-0.152346	-0.13667	0.157738	-0.0171626	0.0633795	0.0146564	-0.27179	-0.64477	-1.04888	-0.676004	-0.587946	-0.883833	-0.362895	-0.449821	-0.565389	-0.527206	-0.38535	-0.266554	-0.39186	-0.483219	-0.695131	-0.475205	-0.158598	-0.112869	-0.280403	-0.33097	-0.803296	-1.54999	-0.714251	-0.726457
AT5G48360	-0.188859	-0.108885	-0.368245	-0.310965	-0.149648	-1.11045	0.0532445	0.223844	0.0149868	-0.37149	-0.291929	-0.0426911	-0.558222	0.0548713	-1.32299	-1.4016	-1.13363	-2.66392	0.135188	0.134653	-0.422437	-1.18111	-1.60917	-1.40386	-0.146963	0.0701862	-0.148126	0.310962	-0.247261	-1.5115	-0.0985751	0.00219867	-0.935057	-1.10857	-1.60568	-1.8242
AT5G49180	-0.0551096	0.286269	-0.764658	-0.282831	-1.11816	0.660428	-0.591061	0.390542	-0.334671	-0.776723	-1.11417	-0.266336	1.0171	0.331095	-0.485292	0.557243	-0.0549597	0.643102	0.185136	-0.984117	-0.261585	0.668309	-0.604699	0.773996	-0.787826	0.0752146	0.503809	0.635721	-0.664133	1.46038	-0.423488	0.43552	-0.471718	0.425174	-0.728063	0.21856
AT5G51750	-0.478975	-0.313531	-0.716744	-0.602999	-0.19424	-0.53448	-0.232735	0.738375	-0.178962	-0.538836	-0.61012	-0.113899	-0.661641	-0.156788	-0.907411	-1.20778	-0.645996	-1.82158	-0.420788	0.704731	-0.0430066	0.12049	-0.53626	-0.56992	-0.163131	-0.0349819	0.124817	0.239337	0.210364	-0.675374	-0.407093	0.553513	-1.51991	-2.28939	-1.66976	-2.39177
AT5G51560	0.13655	-0.039789	0.0314265	-0.612893	-0.187685	-0.228731	-0.118584	0.0486845	-0.0878538	-0.169595	-0.178159	-0.121072	-0.286414	-0.0392458	-0.757571	-1.78855	-2.36729	-2.25667	0.0471664	0.298639	-0.158287	-0.60677	-1.25286	-1.36592	0.0600079	0.138668	-0.218147	-0.206543	-0.210307	-0.114302	0.217543	0.292487	-0.398521	-0.283213	-1.36309	-1.51256
AT5G51550	-1.87355	-0.921424	-0.025902	0.160852	0.0101238	0.429363	-0.802611	-0.326927	-0.415336	-0.209925	-0.172917	0.150612	-0.713972	-1.04605	-2.04594	-2.27757	-2.21756	-2.63705	-0.386037	-0.391046	-1.07245	-1.29355	-1.54575	-1.56313	-0.848889	-1.11103	-1.26577	-0.845634	-0.708141	-0.800121	-0.347592	-0.340436	-1.50368	-2.46875	-1.68826	-2.06792
AT5G53140	0.433385	-0.292312	-0.0109342	-0.530198	-0.0283738	-0.0576871	0.0017225	-0.594076	0.233986	-0.300592	-0.0713544	0.171001	0.258901	-0.262541	-0.141752	-0.545033	0.0770609	-0.00190509	0.0491359	-0.49737	-0.338778	-0.549726	-0.536722	-0.315834	0.0595529	0.0338134	0.135522	0.268576	0.543222	0.463757	0.0427108	-0.553633	-0.294631	-0.568867	-0.404599	-0.578014
AT5G55230	-0.0866808	-0.240926	-0.0390836	-0.286285	-0.0691508	0.113077	0.101672	0.0568244	0.127554	-0.115935	0.04102	-0.0103908	0.0857845	-0.12504	-0.974391	-1.25998	-1.17431	-1.53842	0.101493	-0.0436383	-0.200223	-0.455291	-0.506211	-0.758192	-0.00893072	-0.0652068	-0.309981	-0.173669	0.0576355	0.0402007	0.0373275	-0.103773	-0.470173	-0.546393	-0.482601	-0.878242
AT5G55480	0.248199	0.0914669	0.44912	-0.48298	-0.00337374	-0.0664407	0.274294	0.0373288	0.10179	-0.389167	-0.00854689	0.0397199	0.0189899	-0.26777	-1.17955	-2.60272	-2.79644	-2.88162	0.306928	0.112447	-0.213486	-0.713134	-1.16187	-0.789608	0.188252	-0.0665485	-0.677923	-0.196102	-0.277853	-0.530132	0.114144	-0.0598363	-0.438488	-0.710109	-1.11336	-0.969896
AT5G59810	0.100652	0.19475	-0.392887	-0.619618	0.0122357	0.340641	0.239436	0.0860839	-0.120972	0.0629431	0.245768	-0.457169	0.730248	-0.0326294	-0.127562	0.0111837	0.0633773	-0.350055	1.30446	0.248456	-0.0395043	0.302299	0.628619	0.323286	0.545756	0.488725	0.286605	-0.107577	0.236921	0.0677973	0.547891	-0.190256	0.171271	0.67319	1.30078	0.580678
AT5G60210	0.0687938	0.0182949	-0.331808	-0.247391	-0.279988	-0.0698463	0.114462	0.596608	0.163162	0.153173	-0.238946	0.0743333	0.156627	0.133353	-0.851435	-0.7982	-1.36744	-1.46749	-0.0519495	0.509924	0.0739861	0.267851	0.00341621	-0.374096	0.137402	0.251417	-0.0898324	-0.24285	-0.365379	-0.880054	0.0315033	0.475194	0.0707992	-0.0135874	-0.428857	-0.812445
AT5G60490	-0.38733	-0.642432	0.0558634	-0.311929	0.0149462	-0.00694731	-0.245535	-0.792761	-0.0337667	-0.738351	0.152996	-0.00955275	-0.365655	-0.744316	-0.822716	-0.858945	-0.748222	-1.02783	-0.398805	-0.826643	-0.244944	-0.746909	-0.230086	-0.592003	-0.077863	-0.459482	-0.178792	-0.129383	-0.272398	-0.59499	-0.340879	-0.924465	-1.07792	-1.1822	-0.342337	-0.727838
AT5G60690	0.385944	-0.206173	0.192129	-0.197006	0.0867209	-0.308048	-0.289623	-0.431834	-0.0309669	0.20455	0.05038	-0.0276257	0.0733893	-0.168499	-0.560974	-0.879953	-1.24441	-1.10654	-0.0357439	-0.274728	-0.733383	-0.590485	-0.425026	-0.388017	0.361558	0.0731547	-0.498249	-0.191194	-0.364373	-0.594834	0.419048	0.117172	-0.371076	-0.239438	-0.725729	-0.970772
AT5G62890	0.340327	0.196109	0.137129	-0.0762869	0.0361175	0.257533	-0.0151088	0.270005	0.119052	-0.0904531	0.0917933	-0.067367	0.0481069	0.0798429	-0.413575	-0.977416	-1.06752	-1.06281	-0.197547	0.0535357	0.142401	-0.0426563	0.104881	-0.110434	0.278427	0.199558	-2.70972e-05	-0.339614	-0.0137973	0.0538124	0.0242133	0.03996	-0.551303	-0.852766	-0.503657	-0.766992
AT5G63940	0.359811	0.159698	0.23381	-0.00541147	0.165356	-0.139814	-0.0314798	0.0509078	0.225056	-0.308395	-0.128234	0.0795849	-0.139346	-0.131953	-0.0571562	-0.00324444	-0.689766	-0.673093	0.0307724	0.207686	0.208002	-0.426114	-0.532538	-0.23931	0.372722	0.237557	0.125856	0.110775	0.0355679	-0.205918	0.21059	0.285154	0.0675959	-0.276782	-0.780846	-0.922161
AT5G65700	0.225615	0.0883869	0.289251	0.0773527	0.0876163	0.423895	0.042704	0.130527	0.141534	-0.0650331	0.0916499	-0.0963923	-0.0575319	0.0252183	-0.812286	-1.10344	-1.42615	-1.64015	-0.0311175	0.167809	-0.18453	-0.345893	-0.651135	-0.755585	0.038297	0.299017	-0.555875	-0.638167	-0.546712	-0.583457	0.132924	0.182812	-0.401611	-0.328579	-0.611437	-0.919926
AT5G65990	0.299962	0.0339961	0.130208	-0.109366	0.129946	-0.169972	0.70044	1.09186	0.62257	0.663373	0.679791	-0.436587	0.12497	0.115401	1.21987	1.10782	1.96216	2.49302	1.24494	2.66345	3.04224	3.0818	2.96	2.57164	-0.00341628	-0.107503	1.3837	1.03633	1.47635	2.51427	1.05908	2.59268	3.82821	3.76672	3.41191	2.6275
AT5G66560	0.0413874	0.109612	0.237483	-0.0101887	-0.150469	0.302382	0.292592	0.111019	0.212682	-0.434358	-0.0905687	0.211188	-0.436498	-0.163814	-0.799144	-1.01609	-0.934359	-1.57689	0.343918	0.145682	-0.080428	-0.469542	-1.0804	-0.61001	-0.104275	0.251366	-0.275597	0.271781	0.252891	-0.18871	0.544324	0.175499	-0.16763	-1.0095	-1.17654	-0.733956
AT5G67230	0.42152	0.0065379	0.526675	0.285899	0.118183	-0.884902	0.314797	0.184129	0.0238205	-1.18938	-0.433191	-1.09676	-0.33445	0.167083	0.796418	-0.0118948	-0.0485822	0.117373	0.937246	1.2815	0.664902	0.796582	-0.0585275	0.94182	0.491968	-0.00656767	0.968061	0.703783	0.285383	0.162136	0.421138	1.21467	2.33278	2.11882	0.313857	0.797458
AT5G67360	0.360253	0.228844	0.872408	0.198169	0.426118	0.504126	0.0747038	0.513471	0.253791	0.518856	-0.115489	0.256857	0.0478461	0.0254026	0.486892	0.586332	0.968594	0.922064	-0.0135539	-0.0199636	0.0412397	0.733123	0.114228	0.0908669	-0.114244	0.0178424	0.422715	0.455441	0.759968	1.24068	-0.24493	0.25163	-0.913888	-1.30786	0.0430053	-0.0821952
AT5G67280	0.518828	-0.45452	0.142536	-0.37492	-0.196163	0.431944	0.0406019	0.297763	0.280804	0.330277	0.0235141	0.0780435	-0.240652	-0.0261799	-0.668912	-0.858325	-1.92696	-1.81325	0.296623	0.306667	-0.452797	-0.344001	-0.492442	-0.421913	0.164519	0.205326	-0.0125818	-0.0640822	-0.652119	-0.543476	0.0176506	0.56054	0.202235	0.430552	-0.462463	-0.451114
AT5G26230	0.314336	0.130406	-0.180984	0.169117	-0.137902	0.199198	0.182046	0.334577	-0.135338	-0.0827579	0.127554	0.217522	0.0031047	0.0713936	-0.0948952	-0.50977	-0.913542	-1.12522	0.640397	0.507912	0.0302427	-0.0743133	-0.709032	-0.937581	0.234211	0.273889	0.175998	-0.281253	-0.228216	-0.402376	0.360332	0.146687	-0.450734	-0.205695	-1.0441	-0.632615
AT5G26850	0.333936	0.0401208	0.00108253	-0.161678	-0.00889492	0.129045	0.191117	0.612347	0.318506	-0.0808226	-0.121366	0.072724	-0.0865806	-0.0644466	-0.784813	-0.722859	-0.653696	-1.20343	-0.047495	0.387779	-0.185197	-0.117934	-0.365281	-0.478183	0.196101	0.0984321	-0.326413	-0.262327	-0.277003	-0.864577	0.160216	0.403773	-0.535884	-0.815255	-1.08808	-1.09117
AT5G26780	0.24141	-0.025709	-0.101397	-0.0674243	0.0381634	-0.0575044	-0.00724383	-0.404986	-0.175303	0.0229514	-0.0181805	0.0653462	0.126721	-0.0752059	-0.328716	-0.528412	-0.759806	-0.896838	0.0683572	-0.298845	-0.889959	-0.836575	-1.02411	-0.903306	0.181215	-0.150027	0.111793	0.0367333	0.122958	0.483009	-0.0641514	-0.140303	-0.671558	-1.26271	-1.00799	-0.684861
AT5G27150	-0.248765	0.0948355	0.227955	-0.0240024	-0.171128	-0.271938	-0.160858	-0.562307	-0.156301	-0.329555	0.0896404	-0.130544	-0.021024	0.0922813	0.775481	0.511357	0.754738	1.11179	0.141865	0.151838	0.417412	0.052066	0.104116	0.46823	-0.156083	0.0282634	0.523283	0.590266	0.181421	0.820154	-0.108363	0.00844768	0.314279	-0.142689	0.435983	0.402216
AT5G14880	0.157647	0.249287	0.50872	0.0164538	0.082131	0.189287	-0.311668	-0.502042	0.240603	-0.381816	0.197401	-0.0996454	0.00433855	-0.0360167	-0.390267	0.0105425	-0.478001	-0.994767	-0.302473	-0.959716	-1.09702	-1.05671	-0.556891	-0.714828	0.410526	0.126858	-0.0234101	0.560248	-0.0228977	-0.545022	-0.0659146	-0.443161	-0.739244	-1.56804	-0.704755	-0.86123
AT5G15740	0.541543	-0.0115032	0.204035	-0.317987	0.00614321	0.0662591	-0.109734	0.0190545	0.0816607	-0.0664819	0.170837	-0.214184	-0.0414175	-0.616499	-0.186272	-1.00696	0.681348	-0.0327355	0.326175	0.575218	-0.0517467	-0.421233	-0.340523	-0.847745	-0.108731	-0.48262	0.65474	0.90096	1.27701	1.67913	0.121149	0.394466	0.124679	-0.13565	-0.320636	0.0244875
AT5G16000	-0.0358563	-0.238919	0.154682	-0.129437	0.239259	0.179268	-0.197245	-0.326803	0.0760867	-0.0883378	-0.0211674	0.0643438	-0.371095	-0.176179	-1.28581	-1.18448	-1.18349	-1.98672	-0.206805	-0.267991	-0.511398	-0.874404	-0.765484	-1.03533	0.0230847	-0.130479	-0.685162	-0.205308	0.15381	-0.0839394	0.0243599	-0.134698	-0.105051	-0.0840931	-0.962992	-1.15334
AT1G47128	-0.0502795	0.2473	0.518714	0.535718	0.120139	-0.000602754	-0.467935	-0.108603	0.0382329	0.330574	-0.0715935	-0.0476032	-0.130321	0.0366192	0.620438	1.07983	0.747756	0.893322	-0.205661	0.405543	0.815076	0.872985	1.13119	1.22245	0.0474842	0.226066	0.468027	0.464809	0.242462	0.338798	-0.0607948	0.14514	-0.166483	-0.519954	0.905014	0.5751
AT1G51140	0.512531	1.03675	1.05751	0.0745604	-0.265494	0.0227311	-0.424699	0.0959934	0.268577	0.677162	-0.0479228	-0.199137	-0.135038	0.629566	2.67746	3.0041	1.83556	2.29579	0.511725	2.09824	2.69036	3.17402	2.43654	1.86869	0.597972	0.742351	2.88169	2.30594	1.1177	1.4294	0.586586	1.45091	1.59284	2.01504	2.21332	1.36974
AT4G16340	-0.177422	-0.313221	-0.0833072	-0.148975	-0.209703	0.0240181	0.0712294	-0.221375	-0.0477273	-0.15665	-0.0816724	0.0373152	-0.0259884	-0.0135379	-0.403622	-1.04404	-1.09895	-0.96801	-0.00707564	-0.331225	-0.0347963	-0.480496	-1.03679	-0.86163	0.168888	0.0355732	-0.126077	-0.00210623	0.00995073	-0.409023	-0.112261	-0.138684	-0.443613	-0.747443	-0.953442	-1.09597
AT4G17770	1.15893	0.0393596	-0.22754	-0.15923	-0.450734	0.064153	-0.157411	-0.375739	-0.315038	0.0303339	-0.102805	0.088976	0.370285	0.569787	0.570255	0.350563	-0.0369227	0.366101	0.254255	-0.346806	-0.908706	-0.957477	-1.39494	-0.77151	0.789921	0.618793	1.31884	0.847875	1.08121	0.821131	0.0329072	-0.21091	-1.02872	-2.01331	-1.56538	-2.06907

## Sheet: Sheet1
ID	0.5h_Shoot_Osmotic/CK	1h_Shoot_Osmotic/CK	3h_Shoot_Osmotic/CK	6h_Shoot_Osmotic/CK	12h_Shoot_Osmotic/CK	24h_Shoot_Osmotic/CK	0.5h_Root_Osmotic/CK	1h_Root_Osmotic/CK	3h_Root_Osmotic/CK	6h_Root_Osmotic/CK	12h_Root_Osmotic/CK	24h_Root_Osmotic/CK	0.5h_Shoot_Drought/CK	1h_Shoot_Drought/CK	3h_Shoot_Drought/CK	6h_Shoot_Drought/CK	12h_Shoot_Drought/CK	24h_Shoot_Drought/CK	0.5h_Root_Drought/CK	1h_Root_Drought/CK	3h_Root_Drought/CK	6h_Root_Drought/CK	12h_Root_Drought/CK	24h_Root_Drought/CK	0.5h_Shoot_Salt/CK	1h_Shoot_Salt/CK	3h_Shoot_Salt/CK	6h_Shoot_Salt/CK	12h_Shoot_Salt/CK	24h_Shoot_Salt/CK	0.5h_Root_Salt/CK	1h_Root_Salt/CK	3h_Root_Salt/CK	6h_Root_Salt/CK	12h_Root_Salt/CK	24h_Root_Salt/CK
AT2G26730	-0.308374	-0.0357772	-0.274942	-0.867572	-1.40284	-1.64039	0.041895	-0.0913674	-0.404149	-0.508446	-0.932871	-1.1312	0.49543	0.286254	0.38147	-0.184658	0.126787	0.0221154	-0.1263	-0.145437	-0.171765	-0.100555	0.0779816	-0.116683	-0.0836002	0.0266449	-0.0196682	-0.0428232	0.0747842	0.18451	-0.0325485	-0.181534	-0.437798	-0.813977	-0.850616	-1.15969
AT2G45590	-0.208201	0.408958	-0.399351	-0.469181	-0.761684	-0.832143	-0.470691	-0.636407	-1.06262	-1.24474	-1.3615	-1.05909	0.406846	0.747033	0.294657	0.106327	-0.00521848	0.097907	-0.617122	-0.410168	-0.0291691	-0.571582	-0.0018547	-0.0705291	0.267077	0.580995	0.275735	0.215096	0.0807438	-0.334154	-0.339609	-0.603052	-1.16527	-1.00147	-1.77546	-1.08206
AT2G19170	0.0788996	0.204755	-1.17744	-1.53119	-1.5115	-1.90457	0.156024	-0.0756701	-1.00575	-1.16115	-0.976045	-0.978617	0.049842	0.0881766	0.215218	-0.19527	-0.0800369	0.173186	0.105916	-0.333503	-0.146308	-0.505285	-0.081042	0.151698	0.0830328	0.298271	-0.546789	-0.235732	0.0706685	-0.195246	-0.0531988	-0.49236	-0.599805	-0.610792	-1.02354	-0.940587
AT2G33880	0.603307	0.459739	-0.534614	-0.572748	-0.10991	-0.600484	0.92042	-0.214631	-0.577834	0.0953231	0.581282	0.442345	-0.992871	0.0427867	-0.127521	-0.817275	0.153469	0.491589	0.259021	-0.0697168	-0.388702	-0.08167	0.223442	-0.485121	-0.149028	0.601784	0.435899	-0.558657	-0.0598769	-0.0424211	0.321928	-0.54901	-0.0443001	0.0508461	-0.0581281	-0.30499
AT2G33860	0.136301	0.453458	-0.732826	-0.504011	-0.887666	-1.91789	0.0215161	-0.55944	-0.626497	-0.573942	-0.990415	-0.147902	0.0579981	0.420685	0.326872	-0.083822	-0.039236	0.0155855	-0.171454	-0.488584	0.15874	0.0920109	-0.0306246	-0.154988	0.306791	0.59576	-0.121573	-0.0358657	-0.24087	-0.981067	-0.264234	0.055351	-0.733024	-1.51945	-0.926598	-0.723754
AT2G34870	0.129768	-0.0584167	-0.347222	-0.203284	-0.251539	-0.960829	-1.46133	0.0840643	-0.731459	-0.0803734	-1.1375	-0.612518	-0.490528	-0.430385	0.743124	0.242276	0.172061	0.0583642	-2.14359	-0.483985	-1.91173	0.862141	-1.79462	0.0906704	2.06431	-0.106915	0.383843	0.296982	0.32577	0.203359	-1.96499	-0.514573	-2.07647	-0.126177	-1.10274	-0.509014
AT2G26330	-0.841535	-0.0636592	-0.977429	-0.635546	-1.16641	-1.79723	0.446746	1.09366	0.0837389	-1	0.717157	0.246161	-0.0189796	-0.275937	-0.505813	0.148286	-0.25969	-0.298701	-0.584963	-0.0907655	-0.487728	-1.31982	0.620942	0.0331669	0.00154108	0.0959018	0.338422	0.59988	0.293378	-0.281995	0.156804	-0.0814276	-0.503938	-1.24793	0.135515	-0.338802
AT2G34710	-0.00806672	0.128811	-0.699059	-0.330267	-0.903042	-0.936954	0.0827239	0.164705	-0.324694	-0.0335781	-0.438031	-0.17429	-0.13688	-0.12087	0.239153	0.15448	-0.0232928	0.111558	-0.0602213	0.176548	0.0741965	0.429036	-0.0304514	0.209125	0.174212	0.154603	-0.505897	-0.478108	-0.739922	-0.651307	0.162316	0.197331	-0.883169	-0.994242	-0.684816	-0.772127
AT2G45960	-0.313147	-0.0779616	-0.13755	-0.453922	-1.00412	-0.746816	-0.212692	0.297116	0.401899	0.493497	0.76503	0.33084	0.139062	0.228568	-0.0942322	0.3291	0.0375244	0.301135	-0.122758	-0.203966	0.0954033	0.309438	-0.0388592	0.154755	-0.0128039	0.178572	0.237237	0.147824	-0.283015	-0.077075	0.173567	0.0958919	-0.207182	-0.554458	0.174621	0.134049
AT2G01570	-0.293993	0.136624	-0.474632	-0.342139	-0.4554	-0.703701	0.217257	-0.362541	-0.433355	-0.105508	-0.199669	-0.334468	0.0818494	0.486014	-0.190089	0.0347156	0.0944298	0.239984	0.0964381	-0.161295	0.115136	-0.0471749	-0.05109	-0.239649	0.0768401	-0.071961	-0.185714	-0.0313642	0.0688042	0.024472	0.138409	-0.0502659	0.148476	0.651211	-0.220295	-0.214255
AT2G27040	-0.0331712	0.0618878	-0.708256	-1.14156	-1.22059	-1.89096	0.256563	0.266072	0.13575	-0.0345301	-0.180729	-0.112888	0.230426	-0.0522887	-0.310237	-0.0681143	-0.321974	-0.0609152	-0.0457858	-0.151922	-0.156264	-0.13878	-0.153097	-0.0828005	0.262531	0.191554	-0.195046	-0.0616848	-0.300146	-0.711302	0.198763	0.231861	0.00869567	0.351171	-0.200704	-0.371966
AT2G27810	-0.0626455	-0.197015	-0.965566	-0.864142	-1.40314	-2.1028	-0.116963	-0.0147379	-0.326267	-0.436686	-0.861105	-0.964123	0.00759772	-0.21268	0.118739	0.243672	0.16866	0.192502	0.206822	0.209907	0.0999307	0.134452	0.0132639	0.173312	-0.0434524	-0.278003	-0.334836	-0.14343	0.0106895	-0.264761	0.151046	0.106394	-0.48905	-0.34324	-0.837299	-0.887638
AT2G05920	-0.178347	-0.156211	-0.456793	-0.546027	-0.63725	-1.11968	-0.154159	-0.33094	-0.628153	-0.902684	-0.984306	-0.432093	0.173228	-0.00918654	0.190808	-0.161508	0.053839	-0.0873257	0.27269	-0.343705	0.0149422	-0.287724	0.0350305	-0.0245225	-0.0365167	-0.0440984	-0.0708369	-0.0529286	0.136205	0.0729539	-0.0869328	-0.367678	-1.18212	-1.88371	-1.02567	-0.654022
AT2G37300	-0.282919	-0.0831283	0.232601	0.443377	0.378551	0.0882557	0.310824	0.385946	0.229199	-0.407837	-0.330226	-0.413	0.347393	-0.127602	0.317421	-0.468808	-0.148967	-0.258763	-0.425271	-0.62652	0.113908	-0.867916	-0.122964	0.116512	0.073466	0.0785983	1.32782	1.05701	0.97626	0.636118	-0.0528201	-0.129582	-0.993028	-1.70577	-0.649176	-0.75592
AT2G35620	0.143399	-0.112203	-0.562845	-0.928285	-0.920117	-1.28929	0.30487	-0.234389	-0.665086	-0.753614	-0.369275	-0.594336	0.246986	-0.24631	0.132222	-0.292114	-0.0365491	0.624223	0.379061	-0.0762568	-0.0568479	-0.482998	0.0608938	0.237541	0.0881908	-0.17353	-0.103359	-0.217599	0.254391	0.143576	0.194228	-0.363518	-0.877489	-0.444611	-0.212549	-0.452177
AT2G05790	-0.406187	-0.0235937	-1.60733	-2.13242	-2.5732	-3.34131	-0.261986	0.236403	-0.278435	-0.717745	-1.12528	-1.14887	0.0236215	0.167755	-0.0925208	0.0668958	-0.0331926	-0.216857	-0.125269	0.614253	0.105576	-0.456424	-0.37722	-0.00533595	-0.185852	0.0129082	-0.478107	-0.071402	-0.560679	-0.707046	-0.0322303	0.232901	-0.49893	-0.44526	-1.15407	-1.49478
AT2G28410	-0.674037	-0.133012	-0.298942	-0.68393	-1.27654	-2.12381	-0.679466	-1.14068	-0.463082	-0.722498	-1.06151	-1.23386	0.23395	-0.104026	0.0543798	-0.382768	-0.35623	-0.0334555	-0.852132	-1.1651	0.169109	-0.979107	0.216218	0.178908	0.0349891	0.044425	0.41979	-0.220355	-0.21678	-1.10713	-0.640363	-1.08633	-1.0269	-1.43064	-0.414993	-1.29888
AT1G23080	-0.18179	0.162376	-1.56421	-0.898258	-1.31188	-2.10543	0.0442275	-0.262386	-1.07783	-1.20191	-0.0169265	-0.837942	0.0709031	-0.334849	0.143668	0.346697	-0.139778	0.577219	0.223024	0.246938	0.223546	-0.0717401	0.45703	-0.0315258	0.387571	0.694634	-0.559864	-0.249471	-0.227404	-0.356848	0.346994	0.347136	-0.250398	-0.520001	0.267915	-0.51036
AT1G09750	-0.155656	-0.158801	-2.32353	-2.94933	-3.65572	-4.39521	-0.718591	-1.0115	-1.21165	-3.2954	-3.56324	-2.56039	-0.436139	-0.520252	-0.4236	-0.523428	-0.343945	0.330071	-0.385197	-0.945342	0.393598	-2.19049	-0.878121	0.118799	-0.0574285	-0.0719994	-1.38814	-1.68516	-1.71669	-1.8301	-0.478535	-0.830731	-2.12298	-3.39261	-2.10708	-1.74669
AT1G70370	-0.0624155	-0.102159	-0.635016	-1.15652	-2.21623	-2.33365	0.289623	0.274222	-0.250642	-0.669273	-1.64776	-0.96764	0.338301	0.130447	0.389812	-0.195809	-0.181521	0.0826089	0.100983	-0.376803	-0.253179	-0.803891	-0.109405	0.243009	0.0597762	-0.219499	-0.201669	-0.397265	-0.63528	-0.0267013	0.153282	0.0842891	-0.77758	-1.1215	-1.26923	-1.20958
AT1G78680	0.0320093	0.285112	1.64954	1.22224	0.731924	1.29866	0.0670284	0.963241	1.45442	1.1427	1.3478	1.27424	1.37032	0.971953	1.48574	0.773379	0.284911	0.458525	-0.107873	0.102953	0.303961	0.0597289	0.0852573	0.101869	0.134515	0.476814	1.89656	1.27305	1.34579	1.16085	0.263178	0.722808	0.745655	0.426111	1.24369	0.688353
AT1G02205.1	-0.697057	0.8557	1.50377	2.41524	1.72144	1.83136	1.42991	-0.251539	4.20671	4.00248	3.16718	3.61985	0.836185	1.0047	0.477604	-0.178108	-0.413798	0.502447	-0.638261	0.38405	0.569856	-0.664622	-2.49803	-1.49712	0.456286	0.747307	1.62352	2.78552	1.81767	2.55499	-0.174605	1.18903	0.459432	-0.204618	3.80895	2.82024
AT1G02205.2	-0.837539	0.571985	1.39819	2.2344	1.51326	1.60426	1.17801	1.06283	3.7959	5.1709	3.70141	3.92975	0.339089	0.512381	0.319517	0.0067809	-0.42155	0.286321	-0.725424	-0.0832903	-0.978528	-0.404484	-0.469121	-1.0466	0.226837	0.154586	1.4903	2.59623	1.70941	2.19724	-0.54722	0.686842	2.14173	3.44637	4.52869	3.58379
AT2G42840	-0.668992	0.0326044	-1.03598	-1.75359	-1.62107	-1.63947	0.290373	0.405864	-0.018038	-0.0464097	-1.07679	-1.34542	0.0559749	-0.143606	0.0924675	-0.345022	-0.045429	-0.170372	0.435207	0.843742	-0.00544112	-0.536631	-0.257301	0.150104	-0.108517	-0.156857	-0.0195374	-0.158808	0.0357438	-0.344131	-0.25809	0.423333	-0.831356	-1.75365	-1.38026	-2.74936
AT2G35860	-0.103536	-0.391498	-0.754275	-1.38608	-1.09614	-1.47544	0.0685945	-0.353865	-0.223031	-1.26935	-0.878827	0.0438381	0.401035	-0.227288	0.676586	-0.498971	0.140539	0.650997	0.540978	0.310638	0.687651	-0.19518	0.588678	0.3808	-0.19147	-0.381004	0.0156549	0.195573	0.121791	0.573669	-0.0362783	0.234035	-0.178267	-1.54865	-0.788441	-0.194723
AT2G04850	-0.0560622	0.109438	0.75417	1.36999	0.876093	0.417642	-0.285145	-0.445074	-0.0600681	-0.847269	-0.80449	-0.950769	0.181701	0.0887437	0.897093	0.398434	-0.269157	-0.179681	0.252826	-0.852111	-0.035655	-0.172886	0.462594	0.622355	0.0253729	0.302614	1.32847	1.26678	0.664269	0.374098	-0.177057	-0.690658	-1.08798	-1.20086	0.264672	-0.459151
AT2G01820	-0.129078	-0.144311	-0.450738	0.0886524	0.158006	0.570457	-0.0488585	-0.0849712	-0.23239	-0.251303	-0.642043	0.0581528	0.114676	-0.171202	0.0784387	0.0922137	0.0430508	0.267234	-0.0608059	-0.116068	-0.200673	-0.0496051	0.0115838	0.173031	-0.0615632	0.0724594	-0.184792	0.16938	0.169408	0.592252	0.117185	0.146557	-0.00680049	0.267173	-0.147624	0.225482
AT2G04160	-0.314267	0.144664	0.450642	0.607054	1.8125	1.69415	0.00271362	-0.0685731	-0.247217	-1.32014	-1.45734	-0.816645	0.256966	0.400335	0.561512	0.430548	0.621128	0.480004	0.164215	0.0225533	0.197326	-0.311732	0.0897585	-0.0507347	-0.100146	0.152927	0.43372	0.608873	1.00164	2.05864	-0.0572084	-0.149541	-0.0546131	-0.454705	-0.685994	-0.100512
AT2G04280	-0.136843	-0.543275	-1.03438	-1.13358	-0.466243	-1.01912	-0.395806	-0.535694	-0.775566	-1.06556	-1.2357	-1.10019	-0.272618	-0.51439	-0.265094	-0.214843	0.0629401	-0.0418853	-0.314834	-0.440162	-0.314001	-0.389413	0.0114827	0.0925703	-0.170796	-0.417065	0.0778416	0.349341	0.678945	0.406772	-0.343501	-0.516656	-1.1365	-1.59246	-1.27924	-1.4499
AT2G47160	-0.400669	-1.28453	-1.40948	-1.95824	-1.99005	-2.32759	-0.510608	-0.466612	-0.563893	-1.43615	-0.430511	0.304195	0.551385	-0.348438	0.577645	0.0997262	0.563829	-0.321819	-0.615846	-0.923225	-0.0193899	-0.361052	0.119266	-0.424399	-0.186065	-0.599552	-0.820011	-0.429398	-0.0912232	0.414972	-0.531631	-0.783968	-0.823955	-1.10397	-0.258629	0.907717
AT1G24020	-0.79386	-0.48821	-1.27736	-1.60896	-1.68242	-2.66198	-0.244047	0.0828264	-1.39315	-1.3007	-2.81585	-1.91641	-0.0801619	-0.47582	0.116955	0.0478845	-0.112092	-0.346251	-1.11994	0.850597	-0.536019	-0.538317	-0.853596	-0.938881	-0.0699358	-0.336556	0.239957	0.622411	-0.0799705	-0.435606	-0.16243	0.309887	-3.15134	-1.65349	-1.63011	-0.239935
AT1G75500	-0.334228	-0.344028	-1.20601	-1.10251	-1.66251	-2.45738	-0.120876	-0.399466	-1.10557	-1.50335	-1.40281	-2.58589	0.210205	-0.317739	0.271016	0.225943	0.129101	0.561181	-0.0132003	-0.608214	0.168213	-0.0911104	0.215898	0.141109	0.203219	-0.100203	-1.20781	-0.231833	-0.79191	-0.981997	-0.0847746	-0.326711	-1.31443	-1.64582	-1.07902	-1.97308
AT1G14920	-0.897198	-0.276671	-1.00325	-0.847367	-0.50221	-0.523936	0.174241	0.0294306	0.06819	0.0543663	0.0738662	-0.33014	-0.56615	-0.52324	-0.364222	-0.199709	-0.239969	0.445092	-0.0528217	0.35077	0.172189	-0.183347	-0.169076	0.090582	-0.350042	0.163701	-0.151606	-0.295227	-0.12131	-0.0320685	0.229088	0.300892	0.314892	-0.0937411	-0.585525	-1.0386
AT1G20950	0.0588498	0.023962	-0.591506	-1.26735	-1.27393	-2.32795	0.0101939	-0.113302	-0.476755	-1.0549	-1.63004	-1.4217	0.154701	-0.0786462	-0.527004	-0.377982	-0.0395201	-0.447072	-0.12389	-0.417312	-0.28918	-0.274298	-0.10662	0.169888	0.0831294	-0.0999495	-0.592792	-0.136136	0.236216	-0.16039	0.0497973	-0.202385	-0.795847	-0.858688	-1.66795	-1.15977
AT1G72970	-0.534271	-0.620556	-1.28473	-2.25791	-2.96189	-3.50753	0.370871	0.648724	-0.0835033	-0.0322273	-1.03141	-1.07115	-0.141268	-0.379359	-0.289478	-0.380802	-0.532187	-0.225135	0.23715	1.01783	-0.0312989	-0.0782164	-0.358446	0.191763	-0.11215	-0.522337	-0.264104	-0.120544	-0.615596	-1.04488	0.104056	0.566021	-0.247999	-0.359834	-1.41137	-1.84678
AT1G72810	-0.143014	0.18259	-0.284634	0.045247	0.518615	-0.533107	-0.282926	-0.136805	-0.588225	-0.361828	-0.615603	-0.549827	-0.115178	0.110314	0.38616	0.449029	0.108153	0.122826	-0.426045	-0.133443	0.160183	0.206694	0.476896	0.26369	-0.117752	0.259832	0.0420566	0.159131	0.678618	0.21204	-0.317595	0.0764129	-0.701202	-1.31215	-0.971911	-1.05333
AT1G68560	-0.12688	0.126149	-1.41201	-1.39442	-1.34311	-2.00957	-0.127554	-0.327092	-0.244628	-1.41862	-1.63964	-1.22376	-0.150121	-0.0968872	0.351364	0.0407662	0.280071	0.0703642	0.13838	-0.575428	0.16182	-0.139932	0.367798	0.298943	-0.287376	0.150299	-1.06965	-0.979517	-0.375171	-0.776086	-0.263373	-0.266157	-0.163419	-1.14737	-1.53439	-0.402329
AT1G74720	-0.33755	-0.180022	-0.325459	-0.332715	-0.451438	-0.736006	-0.0221053	0.0226675	-0.54641	-0.313339	-0.82362	-0.478533	0.0607199	-0.197095	-0.000965585	-0.0165816	-0.0254913	-0.0394818	-0.124555	-0.0245194	-0.105044	0.0462488	-0.129398	0.12862	-0.0250495	-0.152431	0.00939918	0.0181784	0.080405	-0.0850079	-0.0165078	0.288119	-0.613402	-1.28521	-1.11039	-0.883385
AT1G78060	-0.216013	0.169346	-0.304122	-0.3185	-0.796136	-1.99671	-0.146683	-0.146764	-0.123922	-0.158888	-0.582672	-0.492484	0.399105	0.213485	0.251797	0.209935	0.02981	0.126254	0.0595463	0.0244723	-0.10067	0.749882	0.279114	0.388572	0.259257	0.134681	0.380739	0.629632	0.73211	0.483688	0.140516	0.0154044	-0.678011	-0.202367	-0.272302	-0.00327137
AT1G80080	0.0788182	-0.369765	-0.520484	-0.755559	-1.0878	-2.47753	0.791346	-1.35107	0.807355	0.444816	0.658627	0.0691424	-0.00150098	-0.319595	0.0653661	-0.375207	-0.251921	-0.336701	-0.364723	-0.263958	0.554589	-0.172975	-0.316062	0.161518	0.159982	0.0155684	-0.0306138	-0.335814	-0.202422	-0.436455	0.0762577	-1.90833	-0.287282	-0.613425	0.484707	-1.13381
AT1G65900	-0.234251	0.657475	-0.645788	-0.217156	-1.05484	-1.31266	-0.0978858	-0.413628	-0.193788	-0.876208	-1.05457	-0.903946	0.290185	0.471832	-0.350609	-0.304921	-0.419753	-0.0788213	-0.0826209	-0.756756	0.0796538	-1.0055	0.074346	-0.089541	0.217406	0.302542	0.543591	0.0463006	0.0563869	-0.132671	-0.142252	-0.418744	-0.496663	-0.987431	-0.545419	-0.893289
AT1G10640	-0.775444	-0.144099	-0.761775	-1.34042	-2.58631	-4.75781	-0.0679719	-0.181475	-0.254031	-0.87409	-1.67432	-1.41099	0.27537	0.534557	-0.722803	-1.07293	-0.624031	-0.302166	-0.892683	-0.325315	-0.0641519	-0.680715	-0.377573	-0.547054	-0.108699	0.0897676	1.04283	-0.11947	-0.943564	-2.25314	0.503162	0.608765	-0.378274	-0.791396	-0.525518	-1.41793
AT1G08190	-0.173305	-0.256879	0.310901	0.681157	0.528734	0.215831	0.00298517	0.420957	0.629745	0.487921	0.248418	0.324134	0.151566	0.196838	0.155967	0.289816	0.197221	-0.0215301	0.198237	0.0148187	0.0783592	0.0509412	0.148413	-0.0908468	-0.181815	-0.0345934	0.567648	0.928888	0.864588	1.06636	0.0312232	0.409335	0.306198	-0.00363723	0.315715	0.620643
AT1G01900	-0.0718723	-0.00728268	0.441502	0.660997	0.375296	-1.48833	-0.130074	0.427206	1.14688	1.68447	1.41559	0.627269	0.0751159	-0.270742	1.03405	0.409895	0.120834	0.217897	0.117368	0.297124	0.69883	-0.443661	1.06096	0.135215	0.113182	-0.39897	0.605659	0.678893	0.761661	-0.346651	-0.587776	-0.136893	-0.120438	-0.158164	2.89989	1.08796
AT1G71770	-0.193721	-0.231455	-1.05673	-0.0880698	-0.305312	-0.398084	-0.241008	0.354738	0.0665181	1.0215	1.10571	0.233294	-0.509782	-0.278412	-0.322469	-0.0842908	0.014779	0.15016	-0.469298	-0.192995	-0.400155	-0.0110879	0.158561	-0.279298	-0.174638	0.0107264	0.0275507	-0.322495	-0.189465	-0.43634	-0.634587	-0.0456719	-0.433136	0.819683	-0.249623	0.541765
AT1G14440	0.387545	-0.342325	-1.04447	-1.23345	-1.07007	-1.5323	-0.446462	0.42346	1.19652	0.149329	0.70044	-0.410202	0.144918	-0.0426515	-0.348144	-0.423334	-0.148135	-0.435863	-0.829466	-0.431785	-2.76876	0.00592483	-0.147265	-0.882448	0.28754	-0.00717136	-0.320232	-0.220348	0.0961662	-0.432658	0.483336	0.0348354	0.616071	0.271175	0.786871	-0.432441
AT1G28440	-0.239484	-0.0612841	-0.488832	-0.698673	-0.720491	-0.824202	-0.120192	-0.0961613	-0.446158	-0.445566	-0.694968	-0.472882	-0.219766	-0.294267	-0.0256522	-0.0457733	0.110198	0.00298233	-0.499097	-0.48661	-0.0535089	0.0127166	-0.0597696	-0.0299415	0.0609103	0.082774	-0.0847407	-0.0149386	-0.126714	-0.311676	0.0639131	0.240107	-0.498424	-0.872207	-0.688687	-0.676903
AT1G79620	-0.415772	0.0292998	-0.359004	0.415898	0.338327	-1.09848	-0.711668	-1.00116	0.635011	-0.158946	-0.345744	-0.705063	0.440689	0.330672	0.94898	0.823939	0.497672	-0.519162	-0.194111	-0.360671	0.130343	-0.307366	0.432071	0.557336	0.471515	0.202523	0.351552	0.919543	1.31794	0.416882	-0.522411	-0.526578	-0.261725	-1.08317	-0.11989	-0.0613522
AT1G41830	-0.329528	-0.0759877	-0.15446	-0.194025	-0.360776	-0.302303	-0.334685	-0.355204	-0.398777	-1.12957	-1.4261	-0.831303	0.420911	0.359724	0.406413	-0.0723824	-0.178785	-0.0805302	0.153751	-0.0855518	0.10682	-0.63832	0.178273	0.0982081	-0.0211223	-0.197718	0.507205	1.02739	0.827019	1.01803	-0.438544	-0.386362	-0.701457	-1.05669	-0.910656	-0.197886
AT1G01300	0.0271174	-0.400025	-0.625378	-1.19728	-1.73413	-1.88796	0.0297435	-0.538503	-0.800548	-0.876943	-1.6413	-1.17904	0.296814	-0.674422	-0.376573	-0.694149	-0.144345	0.38963	0.11925	-0.269398	-0.35589	-0.333497	-0.0465915	0.294692	0.116019	-0.396482	-0.795521	-0.541698	-0.422631	-0.185228	-0.27473	-0.384478	-1.32413	-2.07583	-1.61884	-1.30102
AT1G26570	-0.0579762	-0.308222	-0.714309	-1.38141	-1.08934	-1.60029	0.198032	-0.106288	-0.43923	-0.331982	-0.0272582	-0.249664	0.149593	-0.136621	-0.53995	-0.644055	-0.19968	-0.389288	-0.0942406	-0.180764	-0.28156	-0.551907	0.0776901	-0.280165	-0.320921	-0.444538	-0.231573	-0.28536	-0.190557	-0.258539	-0.121938	-0.486531	-0.440591	-0.215729	0.224087	-0.0835514
AT1G15000	0.359851	0.404054	-0.63771	-0.951774	-1.22117	-1.2691	-0.180318	0.0852289	-0.154954	-0.403268	-0.540793	-0.51333	0.670268	0.311085	0.162786	-0.484238	-0.437405	0.883801	-0.147748	-0.0233006	0.379383	0.222515	0.352059	0.345936	0.625152	0.353297	-0.381167	-0.667294	-0.9337	0.219391	-0.00629163	-0.0217238	-0.90441	-1.18653	-0.924895	-1.21721
AT1G53300	-0.0313456	-0.0182526	-0.334536	-0.865666	-0.674934	-0.794105	0.354386	0.377893	-0.341082	-0.860758	-1.26291	-1.07944	0.691086	0.46529	0.182024	-0.150578	0.0704929	0.29632	-0.00149287	0.673115	0.252188	-0.34795	-0.0162135	-0.0133756	-0.160338	-0.336041	-0.052721	0.0428045	0.378735	0.274778	0.106702	0.233916	0.539102	0.771288	-0.201734	0.0850896
AT1G53240	0.512783	0.11565	-0.457451	-1.33266	-1.56338	-1.78866	0.240284	-0.10455	-0.308924	-0.828438	-0.944693	-0.969031	0.614558	0.237725	-0.130104	-0.369699	-0.12752	-0.0108593	0.308972	-0.187136	-0.00350399	-0.276363	0.0273839	0.234814	0.212353	-0.0288707	-0.625748	-0.598351	-0.411429	-0.142165	0.00924912	-0.334973	-0.951704	-1.40379	-1.03826	-0.626049
AT2G47240	-0.367029	-0.509338	1.03305	0.312112	-0.661284	-0.78577	0.877844	0.242405	0.62961	0.0606908	-0.657462	-0.792616	-0.370783	-0.729374	-0.734888	-0.689586	-0.207615	-0.140489	0.0820867	0.215966	0.122619	0.135149	-0.349103	0.41396	-0.604675	-0.449067	-0.500214	-0.48991	-0.545657	-0.976375	0.0873966	0.0941109	-0.18907	-0.22512	-0.330223	-0.618756
AT1G51460	-0.371684	0.0270879	-0.418941	-1.11916	-1.04134	-1.04815	0.278473	1.05827	0.231757	0.283345	-0.541068	-0.581117	-0.0225262	-0.0966655	-0.551352	-0.331833	-0.213578	-0.236772	-0.240533	0.975063	0.0740977	0.209361	-0.754234	-0.253142	0.0196817	0.227072	0.0458854	0.0605202	-0.263283	-0.846941	-0.183756	1.04225	0.397449	0.875263	-0.408864	-0.809996
AT1G51570	0.12392	-0.0512225	-0.754791	-0.993892	-0.646762	-1.14744	0.313249	0.116403	-0.139636	-0.260189	-0.418636	-0.248769	0.00505992	-0.103694	-0.281027	-0.264885	0.0218348	0.283629	0.0244843	-0.0460438	0.098441	-0.0839099	-0.185829	0.263183	0.0905593	0.107637	-0.448308	-0.366376	-0.103405	-0.274877	0.156159	0.0681462	-0.358855	-0.912345	-0.724654	-0.66362
AT1G69690	-0.742696	-0.515043	-1.11777	-1.47519	-0.994854	-1.14584	0.253622	-0.287729	-0.21513	0.0975538	-0.290043	-0.163232	-0.109759	-0.344564	0.355104	-0.117702	-0.144506	0.539845	-0.174414	-0.59719	-0.0198512	-0.0622619	-0.00225295	-0.341528	0.0531056	-0.0185652	-0.0713955	0.0741272	0.427686	0.360854	-0.164099	-0.544182	-0.219625	-0.561353	-0.526197	-0.118374
AT1G69295	-0.0640213	0.0565406	0.904977	1.21623	2.41862	2.2301	0.481288	0.887935	1.3153	1.47694	1.0976	0.865047	0.574901	0.105811	0.23475	-0.0826611	0.248705	0.468118	-0.0408172	0.349225	0.167061	0.547341	0.261827	0.114674	-0.153077	-0.113803	1.19795	0.783333	1.52763	1.91788	0.286283	0.604093	0.851578	0.90924	0.994635	0.773976
AT1G80310	0.112821	-0.0679041	0.866687	1.21186	1.28178	2.93807	-1.00141	-0.919373	-0.556963	-0.00883118	-0.0198276	0.539748	-0.310411	0.375911	0.523082	0.486216	0.363763	0.765814	-0.727142	-0.583977	-0.0200149	-0.0168701	-0.0250099	0.189863	0.344664	0.488371	0.665742	0.430091	0.821661	1.29078	-0.455703	-0.343759	-0.550417	-0.781083	0.0946109	0.157989
AT1G68400	-0.279313	-0.0558881	-0.794936	-1.31486	-1.07978	-1.41342	-0.144262	0.0341416	-0.846487	-0.701639	-0.75494	-0.697883	-0.417016	-0.0113062	0.16586	0.0501761	-0.0452907	0.570677	-0.366109	0.141258	0.0841497	0.142753	0.230014	0.0209013	-0.245709	0.144697	-0.197138	-0.373484	-0.18266	-0.0985748	-0.0692312	-0.00526928	-0.280776	-0.0949418	-0.411142	-0.477763
AT1G72290	-0.272685	-0.291049	-0.374603	-0.835189	0.107357	-0.632268	0.379009	-0.015348	-0.0855757	-0.257011	0.378512	0.185303	-0.597035	-0.156119	-0.433798	-0.430435	-0.163746	-0.554266	-0.620991	-0.343074	-0.185111	-1.00605	-0.00803732	-0.291135	-0.357427	-0.656046	-0.122484	0.148323	0.0245571	-0.129768	-0.930535	-0.249359	1.21373	0.104758	-0.263034	0.290838
AT1G64390	0.0919616	0.815637	0.427507	-1.09906	-1.46456	-3.19555	0.474041	0.34345	-0.881636	-1.2535	-2.42515	-2.08253	2.23755	0.92346	-0.120658	-1.13287	-0.0411669	-0.174503	-0.0852114	-0.670519	-1.05166	-0.253656	-0.0313269	-0.449882	0.809598	0.724618	1.60987	0.825212	0.252041	-0.656052	0.380315	0.767224	0.162655	0.017308	-1.43319	-0.693365
AT1G55260	-0.112521	-0.194628	-0.444964	-1.12045	-1.13533	-1.22048	0.462129	0.464189	-0.296444	0.938065	0.234683	0.0660623	0.158461	-0.142634	0.495369	-0.514232	-0.221082	0.0592406	-0.0685617	0.460731	-0.188745	0.282505	-0.71446	0.125325	-0.0102829	-0.0151599	0.322571	-0.170451	-0.0636158	0.0728873	0.0382418	0.439592	-0.713743	-0.739949	-0.126357	-0.724881
AT3G07540	-0.414213	0.0563079	-1.35045	-1.65737	-1.59712	-1.83123	-0.00802758	-0.131479	-0.703517	-0.278311	-0.472388	-1.05699	0.1973	0.467494	-0.122074	0.416067	0.205128	0.811517	-0.476514	0.392614	-0.11571	0.614323	-0.104814	0.0542663	0.144734	0.163607	-0.9966	0.117038	-0.4324	-0.554661	-0.131177	0.542009	-0.868237	-1.36549	-0.550853	-1.3908
AT3G10080	-0.465075	-0.202239	-0.681206	-0.57586	-0.917805	-2.30909	-0.140595	-0.465255	-0.171325	-0.708091	-0.910917	-1.24942	-0.224382	-0.474721	0.0934698	0.0375728	-0.0774883	-0.108429	-0.0724369	-0.759206	-0.123075	-0.0800943	0.166032	0.746733	-0.119	-0.00849241	-0.171388	-0.0280337	-0.211881	-1.31961	-0.128728	-0.572376	-1.62283	-1.30149	-0.875217	-1.10818
AT3G05600	-0.591825	-0.236227	-1.2533	-1.64084	-2.31733	-3.40808	0.99949	-0.602512	0.0740006	0.447377	0.485897	-0.0464321	0.0880152	-0.240046	-0.913136	-0.236269	-0.279033	-0.145547	-0.504117	-0.577798	0.323096	0.350977	-0.0730777	-0.704378	-0.133277	-0.322016	0.200322	0.645995	0.385015	-0.488185	0.154653	-0.433627	0.227557	0.722466	0.438956	-0.44889
AT3G02110	-0.355964	-0.288058	-0.957904	-1.46455	-1.85687	-2.45252	0.653414	0.290726	-0.0446949	0.346459	-0.0798898	0.0537762	-0.233894	-0.400211	-0.262145	0.0175417	-0.162267	-0.00823567	0.132197	0.346368	0.0777318	0.12599	-0.358266	0.235512	0.10143	-0.112243	-0.375976	-0.474374	-0.578262	-1.14205	0.106049	0.412681	-0.022958	-0.137802	-0.182286	-0.767845
AT3G08680	-0.257144	-0.349222	-0.795288	-1.48107	-1.59316	-1.62964	-0.123891	-0.254036	-0.733678	-0.847345	-1.13172	-0.871495	-0.0445899	-0.188159	0.0468948	-0.196899	-0.116913	0.154588	0.0146924	-0.126632	0.090086	-0.265856	-0.0484367	0.118764	-0.0181383	-0.186315	-0.21793	-0.0588956	-0.052664	0.165206	-0.136421	-0.289163	-0.602801	-0.528472	-1.0527	-0.901448
AT3G08770	-1.39906	0.261438	-0.464922	-0.894263	-0.922518	-2.96353	0.560334	0.681916	-0.394703	-0.300354	-1.42866	-1.60657	0.205848	0.255073	-0.435014	-0.581952	-0.193102	-0.352022	0.068181	0.687093	-0.24089	-0.192332	-0.606484	0.13983	0.0999349	0.165508	0.0860846	0.571142	0.143888	-1.01246	-0.303774	0.528468	-1.08097	-2.74837	-1.80101	-2.13566
AT3G04290	-0.377673	-0.334167	-1.67221	-2.2452	-2.82857	-5.12839	0.872539	2.13124	-0.0742424	0.994918	0.330541	1.91802	-0.154129	-0.645775	-0.270652	-0.420679	0.153213	-0.179992	0.00264958	2.33696	-1.14487	-0.174498	-0.191059	0.286118	0.107242	-0.328475	-0.632973	-0.228864	-0.360899	-0.984409	1.60777	1.09954	-0.755462	1.53542	-0.0274095	1.34318
AT3G14240	-0.194972	-0.286349	-1.28679	-1.64802	-1.73937	-2.81429	-0.347732	-0.116196	-0.40947	-0.372484	-0.543559	-0.705356	-0.345191	-0.274013	0.397356	0.107455	0.31612	0.417285	-0.0324003	0.319052	0.438554	0.303558	0.237624	0.142939	-0.494156	-0.0405787	-0.9984	-0.791584	-0.358881	-0.355316	-0.150302	0.343196	-0.611811	-1.29345	-0.880236	-0.647998
AT3G16060	-0.176766	-0.173451	-0.192033	-0.201111	-0.449726	-0.528514	0.0289992	0.162414	0.0155985	-0.430778	-0.783946	-0.585702	0.0168327	-0.0547421	-0.0153325	-0.0470535	0.00785356	-0.328251	-0.0610143	-0.115603	-0.159096	-0.260021	-0.195063	0.0662864	-0.173197	-0.040131	0.339965	0.476644	0.452131	0.28045	0.0641263	0.0217429	-0.49027	-1.19826	-0.920681	-0.677019
AT3G17840	0.167514	0.366025	-0.85919	-1.30377	-1.72055	-2.09632	0.281898	0.204771	-0.598687	-0.576593	-1.08245	-1.20869	0.70975	0.29544	0.227013	-0.216908	0.0354475	0.716932	0.37822	0.324765	0.117016	0.162195	0.237388	0.517416	0.447762	0.0711407	-0.216142	-0.0872125	-0.0659132	0.119998	0.335529	0.266498	-0.310726	-0.232862	-1.15054	-1.30974
AT3G21190	-0.495806	-0.33629	-0.81864	-0.650428	-0.853421	-1.96845	-0.174986	-0.600149	-0.520669	-0.950127	-1.05433	-0.978611	-0.0573033	-0.149181	0.00201109	-0.205013	0.138583	-0.107651	-0.192527	-0.803583	-0.295501	-0.471556	0.137605	0.0425999	-0.0787661	-0.149591	-0.0929082	0.790972	0.669709	0.496595	-0.134815	-0.507407	-0.6237	-1.4876	-1.08062	-1.08204
AT3G21750	-0.149705	0.548928	1.29731	1.25109	0.597872	1.62259	0.613544	1.10148	1.52619	1.64226	1.05063	0.971589	0.899865	0.570612	1.1005	0.353624	-0.000461469	0.415669	0.200271	0.35078	0.712037	0.494574	0.116545	0.255476	0.221318	0.522799	0.714165	0.348837	0.0639084	1.12583	0.420279	0.823953	0.493613	0.431105	0.686657	1.22181
AT3G19820	0.105794	-0.229798	-0.770614	-1.77079	-1.82199	-2.30675	-0.0163382	-0.0792359	-0.220507	-0.87756	-1.02559	-0.590369	0.340134	0.0204526	0.308903	0.199687	0.299683	0.474418	0.150121	-0.245255	0.0665383	0.0101128	-0.0524714	0.186715	0.047322	-0.0329941	-0.496059	-0.473867	-0.0973192	0.0723988	0.226855	0.074654	-0.831883	-1.79817	-1.5503	-1.08125
AT3G27020	-0.118814	0.043215	0.519237	0.970869	0.458896	0.615642	-0.00245269	0.401272	0.437412	0.386567	0.0859772	0.500076	-0.0191668	0.0416234	0.211066	0.442351	-0.0203747	0.0117306	-0.388934	-0.170978	-0.086102	-0.0750965	-0.307733	0.0929043	0.197087	0.236593	0.392747	0.201336	-0.207449	0.0486279	0.0112501	0.332569	-0.479783	-1.11596	-0.229912	-0.0708449
AT3G18490	-0.116871	0.317306	0.482132	0.92533	-0.0309632	-0.708294	-0.211226	0.585881	0.394913	1.02423	0.395967	-0.0179248	0.607824	0.726544	1.01131	0.600202	0.102522	0.53204	0.0593356	0.731961	0.485066	0.666768	-0.255157	0.21384	0.360977	0.585007	0.69618	0.821147	0.449552	0.255326	-0.0322582	0.677224	-0.436071	-0.384728	0.16955	-0.0347882
AT3G26140	0.0460851	-0.141014	-0.764149	-0.790365	-0.291515	-0.5227	0.329023	0.237266	0.183722	-0.452752	0.566611	-0.206451	-0.308037	-0.782837	-0.437521	-0.581431	-0.833965	-0.063629	0.229646	-0.801294	0.266727	-0.65501	-1.70012	-0.332689	-0.559788	-0.0491769	0.229785	-0.299871	-0.368409	-0.37183	-0.576966	-0.700673	-0.102443	-0.0398608	-0.108972	-0.47274
AT1G55360	-0.219999	-0.308448	-0.797458	-0.734787	-0.892781	-1.52324	-0.0754132	-0.376588	-0.878787	-1.01947	-1.02644	-0.965793	-0.276185	-0.322582	-0.0855417	-0.179696	-0.107909	0.0332159	-0.0607274	-0.178898	-0.060393	-0.129152	-0.0572241	0.00859594	-0.278394	0.0864096	-0.253881	-0.39632	-0.47147	-0.564749	0.211727	-0.139083	-0.892019	-1.2976	-1.18803	-1.12911
AT3G15095	-0.299928	-0.235051	-0.944955	-0.311172	-0.434228	-0.732692	-0.0802062	0.236676	-0.119078	-0.142321	-0.420193	-0.294164	-0.212028	-0.277232	-0.236438	0.206611	-0.207155	0.250403	-0.0887893	0.0285006	0.0622708	-0.0431226	-0.337481	0.157404	0.217416	0.133889	-0.212561	-0.136068	-0.117171	-0.174476	0.0059194	0.0966519	0.243039	-0.135767	-0.762885	-1.16683
AT3G14067	-0.224232	0.452831	1.83078	2.69455	1.84698	2.22661	-0.471401	0.306588	1.07663	1.16777	0.948658	1.02315	0.625199	1.19244	1.17937	0.58862	0.21315	0.787969	-0.0945403	0.129369	0.304192	0.156776	-0.297435	-0.0820927	0.352301	0.703712	1.90289	1.22713	1.04598	1.26457	0.000286435	0.541823	0.0312813	-0.814959	0.697265	0.570018
AT3G13510	-0.170406	-0.223967	-0.426719	-1.12131	-1.83062	-2.092	-0.190182	-0.277651	-0.505876	-0.367885	-0.868327	-0.4784	-0.0998107	-0.190096	0.0722906	0.0137118	-0.0482938	0.135005	-0.274285	-0.15061	-0.0929377	0.15799	-0.117684	0.288743	0.0175327	-0.032459	-0.188875	-0.565057	-1.13271	-0.759567	0.0242246	-0.0604496	-0.691132	-0.59021	-0.712782	-1.08351
AT3G18850	-0.205885	0.211327	-0.882551	-0.583737	-0.617489	-0.95262	0.261784	0.498568	-0.151023	0.14975	0.1066	0.0601422	0.124427	0.0248747	-0.36473	-0.401631	-0.452392	0.212387	0.0682931	-0.220469	-0.232693	-0.161767	-0.197493	0.174498	0.238202	0.559689	0.156965	0.390956	0.2401	0.109773	-0.185798	0.0423415	-0.337267	0.345209	-0.079248	-0.179088
AT3G20015	-0.710446	0.369811	-0.541769	-0.965699	-1.25895	-1.00374	-0.831025	-1.2751	-0.938146	-0.255163	-0.630044	-0.543901	-0.261688	0.099153	-0.240305	0.00251468	-0.136313	0.310755	-1.10077	-0.696073	0.312076	0.156703	0.500443	0.0442932	0.133023	-0.0520798	-0.121495	-0.249278	-0.608863	-0.447232	-0.761344	-1.25699	-3.09414	-3.26098	-1.44732	-2.39074
AT1G30330	-0.333075	-0.47057	-0.149042	-0.390268	-0.136222	-0.293051	0.2028	-0.454461	-0.678267	-0.649864	-0.783466	-0.835903	-0.129427	-0.532376	0.172561	-0.202019	0.0824032	0.0378341	-0.093379	-0.515262	-0.0635681	-0.138442	-0.0806983	-0.164177	0.185213	-0.321668	-0.25246	-0.276464	-0.131177	-0.11029	-0.194568	-0.582163	-0.927457	-1.4099	-0.878114	-0.764308
AT1G07080	0.0345878	-0.272479	0.426292	0.972446	0.794554	0.736827	-0.0168316	-0.0741749	0.214181	0.414631	0.1909	0.263661	0.191485	-0.00781645	0.231684	0.28107	0.247787	0.55076	-0.000643751	-0.139066	0.277926	-0.0799271	-0.0686428	-0.314958	0.117138	0.0204329	0.468357	0.524315	0.603184	0.737738	-0.254827	-0.293102	-0.205859	-0.379026	0.0924082	-0.230315
AT1G58360	0.149556	0.374163	0.636272	2.15687	2.74595	2.41359	-0.14272	1.54618	1.29584	2.18744	1.66958	2.15493	0.115562	0.494037	1.16387	0.907897	0.498612	0.199343	-0.295051	0.912046	0.0909328	0.842961	-0.412484	-0.00952688	0.072559	0.121585	0.575368	2.12851	1.85167	1.94468	0.122841	1.4771	1.90356	2.12499	1.86244	2.20715
AT1G67040	-0.385401	-0.0195983	-0.747447	-2.02637	-0.306108	-1.32226	0.240393	0.152462	-0.699444	0.438897	0.0409853	-1.07446	-0.158417	-0.0753477	-0.231747	-0.55134	-0.0626319	-0.379036	-0.548923	0.141397	-0.685572	0.410104	-0.235655	-0.0338493	-0.0952757	0.130966	0.00198787	-0.461743	0.391736	-0.430179	0.168741	0.587003	-0.646656	-1.71491	-0.265734	-0.418645
AT1G19920	-0.0855437	-0.0576777	-0.676904	-1.01622	-1.54342	-1.72647	-0.370387	-0.440665	-0.751408	-0.67223	-0.649647	-0.62125	0.16526	-0.0217203	-0.0595264	-0.191586	-0.230391	-0.670362	-0.30624	-0.442798	-0.0522669	-0.0796571	0.0566916	-0.063757	-0.0242023	-0.0372293	-0.384081	-0.0664022	-0.612958	-0.479063	-0.495349	-0.50992	-0.650466	-0.690209	-0.655793	-0.380938
AT4G00430	-0.311821	-0.272152	0.275712	0.318847	0.709861	0.564032	-0.0546791	1.00335	0.465136	1.24788	0.863545	0.734078	0.144102	0.116061	0.0075157	-0.0588366	-0.03417	0.0698549	-0.391102	0.225165	-0.108051	-0.138677	-0.132823	-0.155856	-0.0357039	0.0305091	0.432953	0.456164	0.369316	0.526298	0.0853453	0.453432	0.0720659	0.160233	0.966596	0.709188
AT4G00740	0.180136	-0.0200705	-0.141993	-0.42414	0.0772146	-0.406355	-0.170659	-0.111585	-0.437882	-0.888347	-0.713787	-0.602239	0.344328	-0.036146	0.140657	0.234586	0.328895	0.0265882	0.0341245	-0.270097	0.0930416	-0.159136	0.225635	-0.0182881	0.37933	0.0131956	-0.219389	-0.0105122	0.435193	-0.0546366	0.10704	-0.138865	-1.23643	-2.18592	-1.28976	-1.50909
AT4G02680	0.0195222	-0.399745	-0.583782	-0.321941	-0.673476	-0.782795	-0.234871	-0.552668	-0.840766	-0.832307	-1.16078	-0.93726	-0.0524951	-0.36831	-0.178959	-0.0119461	-0.0375707	-0.0564243	-0.0889855	-0.162729	-0.294219	-0.0268325	-0.20677	0.0108373	0.133647	-0.196267	-0.265635	-0.106784	-0.152331	-0.53465	-0.0484322	-0.301213	-1.28947	-1.80381	-1.22961	-1.21564
AT4G04890	-0.0869747	-0.103476	-0.157134	-0.731626	-0.73938	-0.942582	0.219141	0.105757	-0.374423	-0.103134	-0.986782	-1.03579	0.460354	0.0851337	-0.149665	-0.117655	-0.0270852	0.2475	0.46281	0.442083	0.283509	-0.468644	-0.131722	0.134164	0.195771	0.445969	0.0438684	0.0555045	0.0564328	0.0444888	-0.0209683	-0.00688554	-0.440048	0.0128853	-0.616949	-0.846685
AT4G22130	-0.036731	-0.150167	-0.418038	-0.843064	-0.742034	-1.29217	-0.309599	-0.128672	-0.681204	-0.87743	-1.33836	-1.27146	0.308533	0.145061	0.303932	-0.0122107	0.159389	0.0383774	-0.139773	-0.122569	-0.237472	-0.276176	-0.0569416	0.0636256	0.0192053	-0.18129	-0.207158	0.187848	0.523101	-0.129685	-0.196743	-0.0721332	-0.0672087	0.39303	-0.872448	-0.568688
AT4G23490	-0.0944741	0.250598	-0.11935	-0.361868	-0.964651	-0.760158	0.0813927	-0.210838	-0.0769337	-0.423189	-0.713856	-0.227471	0.511584	0.45726	-0.319215	0.167163	-0.324461	0.154468	-0.165928	-0.266853	0.0217853	-0.52478	-0.275735	-0.252075	0.22281	0.0599342	0.436794	0.684429	0.160149	0.579361	-0.216065	-0.279584	-1.01889	-1.49228	-0.790176	-0.903041
AT4G29030	-1.11338	0.0346385	-0.63534	-1.44125	-1.4865	-2.51899	0.0587264	0.677942	-0.394704	0.0547978	0.321006	-0.303845	-0.0532913	0.0362074	-0.368348	-0.745542	0.0276095	-0.96355	0.413992	0.670799	0.526679	0.528001	0.809986	0.435743	-0.311782	-0.142072	0.0312915	-0.0190935	0.426371	-0.824223	1.2578	0.715035	-0.373605	-0.953498	1.0576	0.432717
AT4G29130	0.0593242	-0.00108241	0.734686	0.785999	0.453726	0.239055	0.0336641	0.0347736	0.0273399	-0.457191	-0.658845	-0.22407	0.547062	0.342035	0.778143	0.269696	0.31416	-0.0346844	0.0233637	-0.0955329	0.00589081	0.0706947	-0.113893	0.240099	-0.0374669	0.0345008	0.445776	0.570731	0.561783	0.701904	-0.00736878	-0.0649111	-0.113105	-0.500622	-0.671341	-0.334074
AT4G29680	-0.512906	0.0529302	-0.183194	0.133673	0.0613598	0.146541	-0.227834	-0.30653	-0.39869	-0.661256	-0.860818	-0.734419	0.0227764	-0.18305	-0.0151401	0.0558798	0.384114	-0.0813442	-0.0367471	-0.320751	-0.211257	-0.266554	-0.123708	0.15752	-0.110022	0.156383	0.0449514	0.0746093	0.293778	0.462978	-0.09441	-0.138317	-0.84807	-1.51032	-1.03833	-0.775011
AT4G29720	0.229812	-0.240918	-0.366363	-0.629417	-1.08536	-0.972274	0.237868	-0.541356	-1.04938	-0.797329	-0.753216	-0.514946	0.270899	0.15571	0.191297	-0.305432	-0.0473843	0.121502	-0.620712	-0.524075	-0.301997	0.184038	0.199712	0.0461046	0.344499	0.0135379	-0.107969	-0.254932	-0.396801	-0.448554	0.404484	-0.279229	-0.433347	-0.656493	-1.25229	-1.01444
AT4G34980	-0.30314	-0.0668059	-0.445042	0.16156	-0.000985184	-0.285183	-0.22688	-0.570788	-0.489063	-0.907718	-1.48026	-1.10021	0.402515	-0.0373379	0.278878	0.13467	0.185482	0.68822	-0.0995477	-0.0127815	0.138525	0.0708751	0.252265	-0.025715	0.215338	0.283814	0.107016	0.319742	0.207009	0.258065	-0.359871	-0.531929	-1.32163	-2.10663	-1.17101	-1.86111
AT4G36360	0.11222	0.182961	0.212013	-0.362625	-0.23475	-0.889891	0.274912	0.22121	0.637639	0.368882	-0.487432	0.0748427	0.661551	0.366807	0.661468	-0.335395	0.0284419	-0.0300618	0.338903	0.0203468	-0.231491	-0.139948	0.0378396	-0.125315	0.366076	0.263771	0.460563	0.533257	0.540871	0.451343	-0.0150337	0.278263	-0.105018	-0.811582	-0.233339	-0.120405
AT4G36250	-0.0774963	-0.240095	-0.130693	-0.331101	-0.838647	-0.743239	0.148315	0.357725	0.0659021	0.397006	-0.105132	-0.282108	-0.00994387	-0.240666	-0.019596	-0.328349	-0.24478	-0.155863	-0.00339538	0.289192	-0.120792	-0.181775	-0.41665	0.187382	-0.144457	-0.00908773	0.12981	0.104749	-0.276558	-0.110049	0.00487535	0.248656	-0.304296	-0.178223	-0.412653	-1.15288
AT4G38220	0.314206	0.263099	0.0994084	0.129423	-0.00266883	-0.534299	-0.180709	-0.132685	-0.113783	-0.262536	-0.203419	-0.112226	0.26161	0.116495	0.45864	0.0853732	0.333818	0.100766	-0.0252993	-0.182042	-0.0792894	0.0047845	-0.0821058	0.13943	0.0572897	0.304244	0.0634489	0.292858	0.0673216	-0.0791934	-0.10349	-0.121382	-0.594525	-1.31204	-0.449879	-0.502559
AT4G38250	0.107658	-0.0187172	-0.0666865	0.308336	0.201564	0.515543	0.0190035	0.122559	0.208846	0.0732244	0.506049	0.589999	0.314313	0.262879	0.366842	0.470143	0.271773	0.362202	-0.150418	0.129094	-0.0579974	-0.220221	0.135094	-0.0262477	0.237516	0.212435	0.154941	0.473244	0.404501	0.964251	0.10846	0.423029	0.0948247	-0.0390415	0.712746	0.889756
AT4G38660	-0.15845	-0.125356	-1.57812	-2.49311	-3.5679	-3.62475	0.19731	-0.298273	-0.862899	-1.37198	-2.2078	-1.93805	0.389759	0.129265	0.264882	-0.22005	0.0116537	0.0339239	0.304737	-0.00911445	0.225909	0.131606	0.208685	0.236397	0.233693	0.0252184	-1.01048	-0.615973	-0.692387	-0.8807	0.105845	-0.177728	-0.698734	-1.32247	-1.55004	-1.7876
AT4G39330	-0.163712	0.0628651	1.14121	0.679979	0.268473	-0.221091	0.188586	0.911434	1.18592	1.11176	-0.103058	-0.414215	1.00756	0.565151	-0.026445	-0.548714	-0.105798	0.0727004	0.094675	1.16181	0.0847322	-0.387383	-0.336862	0.0652813	0.288029	0.288793	1.28098	1.12537	0.453252	0.440742	-0.0978094	0.89496	-0.121037	-0.212847	0.191919	-0.539627
AT3G49670	-0.561308	-0.467784	-1.16808	-2.23328	-2.99056	-3.70674	0.124019	-0.1164	-0.909639	-0.661714	-1.15328	-0.64056	0.414674	-0.845275	-0.0116965	-0.315319	0.0612226	-0.111483	-0.31367	-0.519705	-0.145811	-0.144317	-0.117268	-0.034552	-0.141744	-0.0746697	-0.681227	-0.887848	-0.665852	-1.02166	-0.102553	-0.0798451	-0.728433	-0.857423	-1.1084	-0.88553
AT3G51950	-0.161175	-0.0593952	-0.527037	-0.512979	-0.439896	-0.519757	-0.300303	-0.615918	-0.673723	-0.861409	-0.513495	-0.78679	0.23938	0.0570946	0.0818417	0.0436381	0.078485	0.327152	-0.555724	-0.531853	-0.191465	-0.151465	-0.227079	-0.676045	0.174148	0.126504	0.0916849	-0.233737	0.017444	-0.0946951	-0.515008	-0.300602	-0.835229	-0.626067	-0.416597	-0.88736
AT3G56370	-0.357942	-0.150287	-0.768646	-1.62823	-2.08432	-3.07987	-0.0444719	0.391973	-0.205803	-0.605008	-1.39199	-1.70386	0.563892	0.282522	0.275999	-0.252348	-0.218257	-0.246643	-0.079979	0.248808	0.113254	-0.108093	-0.136077	0.0933132	0.0624354	-0.112305	0.224876	0.00731814	-0.119822	-0.461575	0.086978	0.501304	-0.386011	-0.503286	-1.49232	-1.63019
AT3G59420	-0.243399	-0.312238	-0.430571	-0.323089	-0.322858	-1.40783	0.33542	0.752843	-0.0243525	-1.05845	-1.85249	-1.9006	0.40105	0.0860833	0.63928	-0.0579997	-0.399624	-0.759417	-0.372538	0.0624887	0.206203	-0.409321	-0.445786	0.209398	0.131462	-0.498377	0.589699	0.259937	-0.0208702	-0.538885	0.0986552	0.371573	-0.233373	-1.13277	-1.67455	-1.28335
AT3G59140	0.0659273	-0.256586	0.560951	-0.172963	0.529418	0.484197	-0.0753555	0.666225	1.62537	0.350219	-0.242658	0.108236	0.00654015	-0.164875	-0.325779	-0.260792	0.604672	0.570794	-0.0498737	-0.0446969	0.782283	-0.0449686	-0.113832	0.933933	0.184877	0.160098	0.0302555	0.164748	0.339629	0.70262	0.0697132	0.0387801	1.25635	0.7194	0.199783	0.640543
AT3G61820	0.0398536	-0.0818292	-0.429269	-0.778157	-0.933683	-1.07736	0.00161582	-0.0340774	-1.3228	-0.520167	-1.77333	-1.30938	1.04054	-0.0925087	0.722485	-0.0597902	0.00131854	0.558677	0.213156	0.0552709	-0.0010071	0.323948	-0.0178028	0.25081	0.210807	-0.0285483	0.00849444	-0.088896	-0.214929	-0.290697	-0.150817	0.197686	-1.26216	-0.978412	-1.13628	-0.628308
AT5G01090	-0.151529	-0.146822	-0.783291	-0.674363	-0.733355	-0.930884	0.218659	-0.00200429	-0.424815	-0.159367	-0.0252073	-0.0314166	0.22092	0.0684254	-0.122598	0.069537	-0.0173396	0.20393	0.238153	0.0558363	0.131735	0.24698	0.168	0.0658678	0.0492202	0.140632	-0.212266	0.0291777	-0.0545952	-0.0263368	0.102183	0.0405745	-0.396724	-0.3338	0.0546388	-0.400351
AT5G01020	-0.238747	-0.168794	-0.332482	-0.455372	-0.278081	-0.938723	-0.397561	0.0624104	-0.0963907	-0.48891	-0.374835	-0.360986	-0.0547069	-0.0784775	0.10033	0.290085	0.079457	0.226863	0.0703812	0.168979	0.287173	-0.0293366	-0.132851	0.155246	-0.0352743	0.214192	0.119432	-0.0980677	0.362767	-0.0348562	-0.0315018	0.217697	-0.373551	-0.965441	-0.786432	-0.685377
AT5G01890	0.378384	0.0616877	-0.481137	-1.16817	-0.732291	-0.79762	-0.0203595	0.201929	-0.023459	-0.335096	-0.715055	-1.21022	0.826781	0.254105	0.766456	0.00565435	0.131323	0.142552	0.232728	0.516782	0.57489	0.166753	0.274	0.163811	0.405932	0.0993362	0.380415	-0.0162482	0.199047	0.143091	-0.155444	0.37385	-0.318541	-1.0953	-0.993224	-1.40627
AT5G03170	-0.135529	-0.0728913	-0.199852	0.0838118	0.250019	-0.024214	-0.27816	-0.167135	0.0130658	-0.429419	0.140632	0.678123	-0.0926313	-0.232588	0.0570406	-0.135724	-0.00209999	0.379793	-0.220465	-0.69883	-0.0399227	-0.879769	-0.277793	0.0104088	0.224997	0.1126	0.387091	0.442842	0.431705	0.463782	0.123206	-0.489089	-0.702979	-0.557796	0.388745	0.430958
AT5G07030	-0.475058	0.302449	-0.251723	-0.988724	-1.11095	-2.01973	0.254115	-0.122124	0.1177	-0.786334	-1.61493	-2.18043	0.683562	0.450563	0.931087	-0.0194219	0.102412	0.571712	0.455667	0.15967	0.737112	-0.331985	0.275457	-0.181517	0.608017	0.204853	-0.00625084	-0.0136362	0.0796122	0.52555	-0.178545	-0.142138	-0.795137	-1.53968	-0.460432	-1.48108
AT5G07180	-0.698596	0.236573	-0.51856	-0.739109	-3.91056	-3.29361	0.0549665	0.145851	0.860764	0.495527	0.891476	0.978626	0.241445	0.682759	1.02185	0.605874	0.736599	-0.172301	-1.4011	1.14585	-0.608232	0.0692627	-0.508612	1.19176	-0.112406	0.253717	0.348857	0.657034	0.952165	-1.06496	-0.285621	-0.554589	-0.210897	0.902153	-0.275634	-0.462972
AT5G07800	-0.394386	0.0380084	-0.191202	-0.171043	-0.20223	-0.439975	0.15985	-0.409888	0.402982	0.204325	-0.279109	0.288634	-0.237643	-0.180031	0.23659	-0.156253	-0.11065	0.027906	-0.0251456	-0.631247	-0.249139	-0.0940199	0.178632	-0.0354856	-0.014855	0.0169706	0.407202	0.442603	-0.117648	0.0645255	-0.410371	-0.223123	-0.00161511	-0.640818	-0.0504952	0.296767
AT5G08000	-0.51868	0.075443	-0.627243	-0.817629	-1.10991	-1.70426	0.797846	0.487806	-0.392583	0.70017	0.429047	0.00643683	0.225131	-0.0531982	-0.328394	-0.498029	-0.0969252	0.00134552	0.378816	0.882239	-0.116892	-0.108401	-0.637138	-0.469355	-0.0126992	0.0286418	-0.0831056	-0.299481	0.182737	0.0933151	-1.09727	0.805858	-0.384464	0.639215	-0.200658	-0.0936301
AT5G09760	-0.164256	0.144567	-0.114503	-0.815607	-1.18436	-1.10568	0.207621	0.154475	-0.457651	-1.01698	-0.865956	-0.993037	0.525958	0.496405	-0.0819903	-0.265376	-0.116875	-0.0494713	0.168326	0.303622	0.0311536	-0.682376	0.237408	-0.0376845	-0.0822899	0.0707353	-0.00507099	-0.335157	-0.417549	-0.455884	-0.160037	-0.4089	-0.733885	-0.942983	-0.541169	-1.09218
AT5G10930	-0.355464	0.790085	2.48398	2.93179	2.42332	1.54246	1.05917	2.10756	1.74954	1.24509	0.877904	1.32302	1.46875	1.09569	0.315638	0.0361433	-0.53907	0.388443	-0.638865	-0.055744	0.0219379	0.252378	0.372666	0.113527	0.786765	0.449388	2.60217	2.3306	1.22295	1.05539	0.714756	1.39964	1.14789	0.531282	1.20432	1.06856
AT5G13640	-0.179009	-0.126115	-0.0163785	0.649238	0.249475	0.100585	-0.103564	-0.000169506	-0.112952	-0.0342052	-0.221343	0.0917017	-0.237065	0.0454068	0.275422	0.426305	0.229524	0.0301716	-0.260898	-0.138413	-0.0890039	0.189168	-0.0363077	0.11895	-0.0877991	0.0499262	0.368878	0.407997	0.0050992	-0.426951	-0.154676	-0.0625236	-0.45165	-0.706504	-0.26758	-0.148886
AT5G22860	-0.349501	-0.345159	0.800759	1.96232	2.69719	2.82029	-0.360083	0.358643	2.01202	2.11499	1.7862	3.94346	0.0160895	-0.238471	0.734306	0.450806	-0.054477	-0.12684	-0.15778	-0.15521	1.09116	1.35192	0.123395	0.241905	0.422461	-0.0746192	0.590879	1.53618	0.885519	1.84424	0.0257117	0.851142	1.37034	1.85752	1.91939	3.46717
AT5G23940	-0.762706	0.407058	-0.741593	-1.12199	-1.55925	-2.11883	0.683716	0.580811	0.128495	0.105504	0.0928194	0.677245	0.396458	0.318913	-0.0583326	-0.44598	-0.359739	-0.039124	-0.143773	0.383075	-0.25091	-0.431493	-0.265201	-0.0642055	0.208892	0.402666	0.237324	0.54673	0.152728	0.00606701	0.0504912	0.406722	0.143131	0.472147	0.211082	0.163853
AT5G40150	0.212746	-0.217306	-1.17914	-2.21967	-2.37453	-2.49718	0.253905	0.217868	-0.595677	-0.979072	-0.795814	-1.12693	0.418323	0.228249	-0.11633	-0.625306	-0.315836	0.181845	-0.25528	-0.276312	-0.166781	-0.412205	-0.0553753	-0.097044	0.137227	-0.266296	-0.282256	-0.273517	-0.157231	-0.109639	0.0799172	-0.111978	-0.234596	-0.253671	-0.613856	-0.86528
AT5G41870	0.0295684	0.36264	0.0573802	0.51816	0.585237	0.495914	-2.40031	-2.1469	-1.27069	0.22609	0.422283	0.107207	0.886726	0.34377	0.47435	0.105056	0.124929	0.430012	0.000861825	-0.205162	-0.0663874	1.2306	0.336995	0.476183	0.226145	0.109742	0.442287	-0.14426	0.46239	0.687154	-0.28134	-0.768977	-1.37022	-1.66793	-0.57098	-2.13514
AT5G43020	-0.767977	0.278546	-0.927466	-0.845988	-1.05198	-1.43772	0.41984	0.286108	-0.988104	-1.39571	-1.45254	-1.65743	-0.075506	-0.0140262	0.109911	-0.242285	-0.0838123	0.168639	0.121256	-0.15295	-0.0829274	-0.698437	-0.148489	-0.00931203	0.025743	0.0688129	-0.147566	0.0771738	-0.214364	-0.443547	0.344503	0.0935393	-0.591201	-0.233994	-1.56175	-1.17009
AT5G45670	-0.664488	-0.399361	-2.08749	-3.66812	-3.29144	-5.11754	-0.0283918	0.337512	-1.32306	-1.55829	-2.45355	-3.04131	0.0924355	-0.0975737	-0.735828	-0.298146	-0.0454917	-0.135739	-0.0807096	1.16375	-0.762308	-0.232603	-0.369025	0.0199556	0.0127327	-0.291704	-0.532997	-0.770212	-0.999808	-1.97688	-0.383312	0.719982	-1.04046	-0.561536	-2.03759	-3.14131
AT5G47640	-0.248454	1.83389	2.6418	1.9027	0.87061	0.512944	2.05713	2.90013	1.83887	1.31521	1.20007	0.482547	1.6103	2.63395	-0.0243182	0.11176	-0.473685	0.422408	0.0728045	0.48118	-0.0688664	-0.122632	-0.135647	-0.0310968	0.204507	1.50618	2.85141	1.43852	1.14027	0.712633	1.92704	2.32826	2.65667	2.65391	1.74133	0.86732
AT5G47780	-0.27179	-0.64477	-1.04888	-0.676004	-0.587946	-0.883833	-0.362895	-0.449821	-0.565389	-0.527206	-0.38535	-0.266554	-0.732124	-0.822543	0.00820174	0.187798	0.0081847	0.0330583	-0.152346	-0.13667	0.157738	-0.0171626	0.0633795	0.0146564	-0.39186	-0.483219	-0.695131	-0.475205	-0.158598	-0.112869	-0.280403	-0.33097	-0.803296	-1.54999	-0.714251	-0.726457
AT5G48360	-0.558222	0.0548713	-1.32299	-1.4016	-1.13363	-2.66392	0.135188	0.134653	-0.422437	-1.18111	-1.60917	-1.40386	-0.188859	-0.108885	-0.368245	-0.310965	-0.149648	-1.11045	0.0532445	0.223844	0.0149868	-0.37149	-0.291929	-0.0426911	-0.146963	0.0701862	-0.148126	0.310962	-0.247261	-1.5115	-0.0985751	0.00219867	-0.935057	-1.10857	-1.60568	-1.8242
AT5G49180	1.0171	0.331095	-0.485292	0.557243	-0.0549597	0.643102	0.185136	-0.984117	-0.261585	0.668309	-0.604699	0.773996	-0.0551096	0.286269	-0.764658	-0.282831	-1.11816	0.660428	-0.591061	0.390542	-0.334671	-0.776723	-1.11417	-0.266336	-0.787826	0.0752146	0.503809	0.635721	-0.664133	1.46038	-0.423488	0.43552	-0.471718	0.425174	-0.728063	0.21856
AT5G51750	-0.661641	-0.156788	-0.907411	-1.20778	-0.645996	-1.82158	-0.420788	0.704731	-0.0430066	0.12049	-0.53626	-0.56992	-0.478975	-0.313531	-0.716744	-0.602999	-0.19424	-0.53448	-0.232735	0.738375	-0.178962	-0.538836	-0.61012	-0.113899	-0.163131	-0.0349819	0.124817	0.239337	0.210364	-0.675374	-0.407093	0.553513	-1.51991	-2.28939	-1.66976	-2.39177
AT5G51560	-0.286414	-0.0392458	-0.757571	-1.78855	-2.36729	-2.25667	0.0471664	0.298639	-0.158287	-0.60677	-1.25286	-1.36592	0.13655	-0.039789	0.0314265	-0.612893	-0.187685	-0.228731	-0.118584	0.0486845	-0.0878538	-0.169595	-0.178159	-0.121072	0.0600079	0.138668	-0.218147	-0.206543	-0.210307	-0.114302	0.217543	0.292487	-0.398521	-0.283213	-1.36309	-1.51256
AT5G51550	-0.713972	-1.04605	-2.04594	-2.27757	-2.21756	-2.63705	-0.386037	-0.391046	-1.07245	-1.29355	-1.54575	-1.56313	-1.87355	-0.921424	-0.025902	0.160852	0.0101238	0.429363	-0.802611	-0.326927	-0.415336	-0.209925	-0.172917	0.150612	-0.848889	-1.11103	-1.26577	-0.845634	-0.708141	-0.800121	-0.347592	-0.340436	-1.50368	-2.46875	-1.68826	-2.06792
AT5G53140	0.258901	-0.262541	-0.141752	-0.545033	0.0770609	-0.00190509	0.0491359	-0.49737	-0.338778	-0.549726	-0.536722	-0.315834	0.433385	-0.292312	-0.0109342	-0.530198	-0.0283738	-0.0576871	0.0017225	-0.594076	0.233986	-0.300592	-0.0713544	0.171001	0.0595529	0.0338134	0.135522	0.268576	0.543222	0.463757	0.0427108	-0.553633	-0.294631	-0.568867	-0.404599	-0.578014
AT5G55230	0.0857845	-0.12504	-0.974391	-1.25998	-1.17431	-1.53842	0.101493	-0.0436383	-0.200223	-0.455291	-0.506211	-0.758192	-0.0866808	-0.240926	-0.0390836	-0.286285	-0.0691508	0.113077	0.101672	0.0568244	0.127554	-0.115935	0.04102	-0.0103908	-0.00893072	-0.0652068	-0.309981	-0.173669	0.0576355	0.0402007	0.0373275	-0.103773	-0.470173	-0.546393	-0.482601	-0.878242
AT5G55480	0.0189899	-0.26777	-1.17955	-2.60272	-2.79644	-2.88162	0.306928	0.112447	-0.213486	-0.713134	-1.16187	-0.789608	0.248199	0.0914669	0.44912	-0.48298	-0.00337374	-0.0664407	0.274294	0.0373288	0.10179	-0.389167	-0.00854689	0.0397199	0.188252	-0.0665485	-0.677923	-0.196102	-0.277853	-0.530132	0.114144	-0.0598363	-0.438488	-0.710109	-1.11336	-0.969896
AT5G59810	0.730248	-0.0326294	-0.127562	0.0111837	0.0633773	-0.350055	1.30446	0.248456	-0.0395043	0.302299	0.628619	0.323286	0.100652	0.19475	-0.392887	-0.619618	0.0122357	0.340641	0.239436	0.0860839	-0.120972	0.0629431	0.245768	-0.457169	0.545756	0.488725	0.286605	-0.107577	0.236921	0.0677973	0.547891	-0.190256	0.171271	0.67319	1.30078	0.580678
AT5G60210	0.156627	0.133353	-0.851435	-0.7982	-1.36744	-1.46749	-0.0519495	0.509924	0.0739861	0.267851	0.00341621	-0.374096	0.0687938	0.0182949	-0.331808	-0.247391	-0.279988	-0.0698463	0.114462	0.596608	0.163162	0.153173	-0.238946	0.0743333	0.137402	0.251417	-0.0898324	-0.24285	-0.365379	-0.880054	0.0315033	0.475194	0.0707992	-0.0135874	-0.428857	-0.812445
AT5G60490	-0.365655	-0.744316	-0.822716	-0.858945	-0.748222	-1.02783	-0.398805	-0.826643	-0.244944	-0.746909	-0.230086	-0.592003	-0.38733	-0.642432	0.0558634	-0.311929	0.0149462	-0.00694731	-0.245535	-0.792761	-0.0337667	-0.738351	0.152996	-0.00955275	-0.077863	-0.459482	-0.178792	-0.129383	-0.272398	-0.59499	-0.340879	-0.924465	-1.07792	-1.1822	-0.342337	-0.727838
AT5G60690	0.0733893	-0.168499	-0.560974	-0.879953	-1.24441	-1.10654	-0.0357439	-0.274728	-0.733383	-0.590485	-0.425026	-0.388017	0.385944	-0.206173	0.192129	-0.197006	0.0867209	-0.308048	-0.289623	-0.431834	-0.0309669	0.20455	0.05038	-0.0276257	0.361558	0.0731547	-0.498249	-0.191194	-0.364373	-0.594834	0.419048	0.117172	-0.371076	-0.239438	-0.725729	-0.970772
AT5G62890	0.0481069	0.0798429	-0.413575	-0.977416	-1.06752	-1.06281	-0.197547	0.0535357	0.142401	-0.0426563	0.104881	-0.110434	0.340327	0.196109	0.137129	-0.0762869	0.0361175	0.257533	-0.0151088	0.270005	0.119052	-0.0904531	0.0917933	-0.067367	0.278427	0.199558	-2.70972e-05	-0.339614	-0.0137973	0.0538124	0.0242133	0.03996	-0.551303	-0.852766	-0.503657	-0.766992
AT5G63940	-0.139346	-0.131953	-0.0571562	-0.00324444	-0.689766	-0.673093	0.0307724	0.207686	0.208002	-0.426114	-0.532538	-0.23931	0.359811	0.159698	0.23381	-0.00541147	0.165356	-0.139814	-0.0314798	0.0509078	0.225056	-0.308395	-0.128234	0.0795849	0.372722	0.237557	0.125856	0.110775	0.0355679	-0.205918	0.21059	0.285154	0.0675959	-0.276782	-0.780846	-0.922161
AT5G65700	-0.0575319	0.0252183	-0.812286	-1.10344	-1.42615	-1.64015	-0.0311175	0.167809	-0.18453	-0.345893	-0.651135	-0.755585	0.225615	0.0883869	0.289251	0.0773527	0.0876163	0.423895	0.042704	0.130527	0.141534	-0.0650331	0.0916499	-0.0963923	0.038297	0.299017	-0.555875	-0.638167	-0.546712	-0.583457	0.132924	0.182812	-0.401611	-0.328579	-0.611437	-0.919926
AT5G65990	0.12497	0.115401	1.21987	1.10782	1.96216	2.49302	1.24494	2.66345	3.04224	3.0818	2.96	2.57164	0.299962	0.0339961	0.130208	-0.109366	0.129946	-0.169972	0.70044	1.09186	0.62257	0.663373	0.679791	-0.436587	-0.00341628	-0.107503	1.3837	1.03633	1.47635	2.51427	1.05908	2.59268	3.82821	3.76672	3.41191	2.6275
AT5G66560	-0.436498	-0.163814	-0.799144	-1.01609	-0.934359	-1.57689	0.343918	0.145682	-0.080428	-0.469542	-1.0804	-0.61001	0.0413874	0.109612	0.237483	-0.0101887	-0.150469	0.302382	0.292592	0.111019	0.212682	-0.434358	-0.0905687	0.211188	-0.104275	0.251366	-0.275597	0.271781	0.252891	-0.18871	0.544324	0.175499	-0.16763	-1.0095	-1.17654	-0.733956
AT5G67230	-0.33445	0.167083	0.796418	-0.0118948	-0.0485822	0.117373	0.937246	1.2815	0.664902	0.796582	-0.0585275	0.94182	0.42152	0.0065379	0.526675	0.285899	0.118183	-0.884902	0.314797	0.184129	0.0238205	-1.18938	-0.433191	-1.09676	0.491968	-0.00656767	0.968061	0.703783	0.285383	0.162136	0.421138	1.21467	2.33278	2.11882	0.313857	0.797458
AT5G67360	0.0478461	0.0254026	0.486892	0.586332	0.968594	0.922064	-0.0135539	-0.0199636	0.0412397	0.733123	0.114228	0.0908669	0.360253	0.228844	0.872408	0.198169	0.426118	0.504126	0.0747038	0.513471	0.253791	0.518856	-0.115489	0.256857	-0.114244	0.0178424	0.422715	0.455441	0.759968	1.24068	-0.24493	0.25163	-0.913888	-1.30786	0.0430053	-0.0821952
AT5G67280	-0.240652	-0.0261799	-0.668912	-0.858325	-1.92696	-1.81325	0.296623	0.306667	-0.452797	-0.344001	-0.492442	-0.421913	0.518828	-0.45452	0.142536	-0.37492	-0.196163	0.431944	0.0406019	0.297763	0.280804	0.330277	0.0235141	0.0780435	0.164519	0.205326	-0.0125818	-0.0640822	-0.652119	-0.543476	0.0176506	0.56054	0.202235	0.430552	-0.462463	-0.451114
AT5G26230	0.0031047	0.0713936	-0.0948952	-0.50977	-0.913542	-1.12522	0.640397	0.507912	0.0302427	-0.0743133	-0.709032	-0.937581	0.314336	0.130406	-0.180984	0.169117	-0.137902	0.199198	0.182046	0.334577	-0.135338	-0.0827579	0.127554	0.217522	0.234211	0.273889	0.175998	-0.281253	-0.228216	-0.402376	0.360332	0.146687	-0.450734	-0.205695	-1.0441	-0.632615
AT5G26850	-0.0865806	-0.0644466	-0.784813	-0.722859	-0.653696	-1.20343	-0.047495	0.387779	-0.185197	-0.117934	-0.365281	-0.478183	0.333936	0.0401208	0.00108253	-0.161678	-0.00889492	0.129045	0.191117	0.612347	0.318506	-0.0808226	-0.121366	0.072724	0.196101	0.0984321	-0.326413	-0.262327	-0.277003	-0.864577	0.160216	0.403773	-0.535884	-0.815255	-1.08808	-1.09117
AT5G26780	0.126721	-0.0752059	-0.328716	-0.528412	-0.759806	-0.896838	0.0683572	-0.298845	-0.889959	-0.836575	-1.02411	-0.903306	0.24141	-0.025709	-0.101397	-0.0674243	0.0381634	-0.0575044	-0.00724383	-0.404986	-0.175303	0.0229514	-0.0181805	0.0653462	0.181215	-0.150027	0.111793	0.0367333	0.122958	0.483009	-0.0641514	-0.140303	-0.671558	-1.26271	-1.00799	-0.684861
AT5G27150	-0.021024	0.0922813	0.775481	0.511357	0.754738	1.11179	0.141865	0.151838	0.417412	0.052066	0.104116	0.46823	-0.248765	0.0948355	0.227955	-0.0240024	-0.171128	-0.271938	-0.160858	-0.562307	-0.156301	-0.329555	0.0896404	-0.130544	-0.156083	0.0282634	0.523283	0.590266	0.181421	0.820154	-0.108363	0.00844768	0.314279	-0.142689	0.435983	0.402216
AT5G14880	0.00433855	-0.0360167	-0.390267	0.0105425	-0.478001	-0.994767	-0.302473	-0.959716	-1.09702	-1.05671	-0.556891	-0.714828	0.157647	0.249287	0.50872	0.0164538	0.082131	0.189287	-0.311668	-0.502042	0.240603	-0.381816	0.197401	-0.0996454	0.410526	0.126858	-0.0234101	0.560248	-0.0228977	-0.545022	-0.0659146	-0.443161	-0.739244	-1.56804	-0.704755	-0.86123
AT5G15740	-0.0414175	-0.616499	-0.186272	-1.00696	0.681348	-0.0327355	0.326175	0.575218	-0.0517467	-0.421233	-0.340523	-0.847745	0.541543	-0.0115032	0.204035	-0.317987	0.00614321	0.0662591	-0.109734	0.0190545	0.0816607	-0.0664819	0.170837	-0.214184	-0.108731	-0.48262	0.65474	0.90096	1.27701	1.67913	0.121149	0.394466	0.124679	-0.13565	-0.320636	0.0244875
AT5G16000	-0.371095	-0.176179	-1.28581	-1.18448	-1.18349	-1.98672	-0.206805	-0.267991	-0.511398	-0.874404	-0.765484	-1.03533	-0.0358563	-0.238919	0.154682	-0.129437	0.239259	0.179268	-0.197245	-0.326803	0.0760867	-0.0883378	-0.0211674	0.0643438	0.0230847	-0.130479	-0.685162	-0.205308	0.15381	-0.0839394	0.0243599	-0.134698	-0.105051	-0.0840931	-0.962992	-1.15334
AT1G47128	-0.130321	0.0366192	0.620438	1.07983	0.747756	0.893322	-0.205661	0.405543	0.815076	0.872985	1.13119	1.22245	-0.0502795	0.2473	0.518714	0.535718	0.120139	-0.000602754	-0.467935	-0.108603	0.0382329	0.330574	-0.0715935	-0.0476032	0.0474842	0.226066	0.468027	0.464809	0.242462	0.338798	-0.0607948	0.14514	-0.166483	-0.519954	0.905014	0.5751
AT1G51140	-0.135038	0.629566	2.67746	3.0041	1.83556	2.29579	0.511725	2.09824	2.69036	3.17402	2.43654	1.86869	0.512531	1.03675	1.05751	0.0745604	-0.265494	0.0227311	-0.424699	0.0959934	0.268577	0.677162	-0.0479228	-0.199137	0.597972	0.742351	2.88169	2.30594	1.1177	1.4294	0.586586	1.45091	1.59284	2.01504	2.21332	1.36974
AT4G16340	-0.0259884	-0.0135379	-0.403622	-1.04404	-1.09895	-0.96801	-0.00707564	-0.331225	-0.0347963	-0.480496	-1.03679	-0.86163	-0.177422	-0.313221	-0.0833072	-0.148975	-0.209703	0.0240181	0.0712294	-0.221375	-0.0477273	-0.15665	-0.0816724	0.0373152	0.168888	0.0355732	-0.126077	-0.00210623	0.00995073	-0.409023	-0.112261	-0.138684	-0.443613	-0.747443	-0.953442	-1.09597
AT4G17770	0.370285	0.569787	0.570255	0.350563	-0.0369227	0.366101	0.254255	-0.346806	-0.908706	-0.957477	-1.39494	-0.77151	1.15893	0.0393596	-0.22754	-0.15923	-0.450734	0.064153	-0.157411	-0.375739	-0.315038	0.0303339	-0.102805	0.088976	0.789921	0.618793	1.31884	0.847875	1.08121	0.821131	0.0329072	-0.21091	-1.02872	-2.01331	-1.56538	-2.06907

## Sheet: Sheet4
ID	0.5h_Shoot_Osmotic/CK	1h_Shoot_Osmotic/CK	3h_Shoot_Osmotic/CK	6h_Shoot_Osmotic/CK	0.5h_Root_Osmotic/CK	1h_Root_Osmotic/CK	3h_Root_Osmotic/CK	6h_Root_Osmotic/CK	0.5h_Shoot_Drought/CK	1h_Shoot_Drought/CK	3h_Shoot_Drought/CK	6h_Shoot_Drought/CK	0.5h_Root_Drought/CK	1h_Root_Drought/CK	3h_Root_Drought/CK	6h_Root_Drought/CK	0.5h_Shoot_Salt/CK	1h_Shoot_Salt/CK	3h_Shoot_Salt/CK	6h_Shoot_Salt/CK	0.5h_Root_Salt/CK	1h_Root_Salt/CK	3h_Root_Salt/CK	6h_Root_Salt/CK
AT2G26730	-0.308374	-0.0357772	-0.274942	-0.867572	0.041895	-0.0913674	-0.404149	-0.508446	0.49543	0.286254	0.38147	-0.184658	-0.1263	-0.145437	-0.171765	-0.100555	-0.0836002	0.0266449	-0.0196682	-0.0428232	-0.0325485	-0.181534	-0.437798	-0.813977
AT2G45590	-0.208201	0.408958	-0.399351	-0.469181	-0.470691	-0.636407	-1.06262	-1.24474	0.406846	0.747033	0.294657	0.106327	-0.617122	-0.410168	-0.0291691	-0.571582	0.267077	0.580995	0.275735	0.215096	-0.339609	-0.603052	-1.16527	-1.00147
AT2G19170	0.0788996	0.204755	-1.17744	-1.53119	0.156024	-0.0756701	-1.00575	-1.16115	0.049842	0.0881766	0.215218	-0.19527	0.105916	-0.333503	-0.146308	-0.505285	0.0830328	0.298271	-0.546789	-0.235732	-0.0531988	-0.49236	-0.599805	-0.610792
AT2G33880	0.603307	0.459739	-0.534614	-0.572748	0.92042	-0.214631	-0.577834	0.0953231	-0.992871	0.0427867	-0.127521	-0.817275	0.259021	-0.0697168	-0.388702	-0.08167	-0.149028	0.601784	0.435899	-0.558657	0.321928	-0.54901	-0.0443001	0.0508461
AT2G33860	0.136301	0.453458	-0.732826	-0.504011	0.0215161	-0.55944	-0.626497	-0.573942	0.0579981	0.420685	0.326872	-0.083822	-0.171454	-0.488584	0.15874	0.0920109	0.306791	0.59576	-0.121573	-0.0358657	-0.264234	0.055351	-0.733024	-1.51945
AT2G34870	0.129768	-0.0584167	-0.347222	-0.203284	-1.46133	0.0840643	-0.731459	-0.0803734	-0.490528	-0.430385	0.743124	0.242276	-2.14359	-0.483985	-1.91173	0.862141	2.06431	-0.106915	0.383843	0.296982	-1.96499	-0.514573	-2.07647	-0.126177
AT2G26330	-0.841535	-0.0636592	-0.977429	-0.635546	0.446746	1.09366	0.0837389	-1	-0.0189796	-0.275937	-0.505813	0.148286	-0.584963	-0.0907655	-0.487728	-1.31982	0.00154108	0.0959018	0.338422	0.59988	0.156804	-0.0814276	-0.503938	-1.24793
AT2G34710	-0.00806672	0.128811	-0.699059	-0.330267	0.0827239	0.164705	-0.324694	-0.0335781	-0.13688	-0.12087	0.239153	0.15448	-0.0602213	0.176548	0.0741965	0.429036	0.174212	0.154603	-0.505897	-0.478108	0.162316	0.197331	-0.883169	-0.994242
AT2G45960	-0.313147	-0.0779616	-0.13755	-0.453922	-0.212692	0.297116	0.401899	0.493497	0.139062	0.228568	-0.0942322	0.3291	-0.122758	-0.203966	0.0954033	0.309438	-0.0128039	0.178572	0.237237	0.147824	0.173567	0.0958919	-0.207182	-0.554458
AT2G01570	-0.293993	0.136624	-0.474632	-0.342139	0.217257	-0.362541	-0.433355	-0.105508	0.0818494	0.486014	-0.190089	0.0347156	0.0964381	-0.161295	0.115136	-0.0471749	0.0768401	-0.071961	-0.185714	-0.0313642	0.138409	-0.0502659	0.148476	0.651211
AT2G27040	-0.0331712	0.0618878	-0.708256	-1.14156	0.256563	0.266072	0.13575	-0.0345301	0.230426	-0.0522887	-0.310237	-0.0681143	-0.0457858	-0.151922	-0.156264	-0.13878	0.262531	0.191554	-0.195046	-0.0616848	0.198763	0.231861	0.00869567	0.351171
AT2G27810	-0.0626455	-0.197015	-0.965566	-0.864142	-0.116963	-0.0147379	-0.326267	-0.436686	0.00759772	-0.21268	0.118739	0.243672	0.206822	0.209907	0.0999307	0.134452	-0.0434524	-0.278003	-0.334836	-0.14343	0.151046	0.106394	-0.48905	-0.34324
AT2G05920	-0.178347	-0.156211	-0.456793	-0.546027	-0.154159	-0.33094	-0.628153	-0.902684	0.173228	-0.00918654	0.190808	-0.161508	0.27269	-0.343705	0.0149422	-0.287724	-0.0365167	-0.0440984	-0.0708369	-0.0529286	-0.0869328	-0.367678	-1.18212	-1.88371
AT2G37300	-0.282919	-0.0831283	0.232601	0.443377	0.310824	0.385946	0.229199	-0.407837	0.347393	-0.127602	0.317421	-0.468808	-0.425271	-0.62652	0.113908	-0.867916	0.073466	0.0785983	1.32782	1.05701	-0.0528201	-0.129582	-0.993028	-1.70577
AT2G35620	0.143399	-0.112203	-0.562845	-0.928285	0.30487	-0.234389	-0.665086	-0.753614	0.246986	-0.24631	0.132222	-0.292114	0.379061	-0.0762568	-0.0568479	-0.482998	0.0881908	-0.17353	-0.103359	-0.217599	0.194228	-0.363518	-0.877489	-0.444611
AT2G05790	-0.406187	-0.0235937	-1.60733	-2.13242	-0.261986	0.236403	-0.278435	-0.717745	0.0236215	0.167755	-0.0925208	0.0668958	-0.125269	0.614253	0.105576	-0.456424	-0.185852	0.0129082	-0.478107	-0.071402	-0.0322303	0.232901	-0.49893	-0.44526
AT2G28410	-0.674037	-0.133012	-0.298942	-0.68393	-0.679466	-1.14068	-0.463082	-0.722498	0.23395	-0.104026	0.0543798	-0.382768	-0.852132	-1.1651	0.169109	-0.979107	0.0349891	0.044425	0.41979	-0.220355	-0.640363	-1.08633	-1.0269	-1.43064
AT1G23080	-0.18179	0.162376	-1.56421	-0.898258	0.0442275	-0.262386	-1.07783	-1.20191	0.0709031	-0.334849	0.143668	0.346697	0.223024	0.246938	0.223546	-0.0717401	0.387571	0.694634	-0.559864	-0.249471	0.346994	0.347136	-0.250398	-0.520001
AT1G09750	-0.155656	-0.158801	-2.32353	-2.94933	-0.718591	-1.0115	-1.21165	-3.2954	-0.436139	-0.520252	-0.4236	-0.523428	-0.385197	-0.945342	0.393598	-2.19049	-0.0574285	-0.0719994	-1.38814	-1.68516	-0.478535	-0.830731	-2.12298	-3.39261
AT1G70370	-0.0624155	-0.102159	-0.635016	-1.15652	0.289623	0.274222	-0.250642	-0.669273	0.338301	0.130447	0.389812	-0.195809	0.100983	-0.376803	-0.253179	-0.803891	0.0597762	-0.219499	-0.201669	-0.397265	0.153282	0.0842891	-0.77758	-1.1215
AT1G78680	0.0320093	0.285112	1.64954	1.22224	0.0670284	0.963241	1.45442	1.1427	1.37032	0.971953	1.48574	0.773379	-0.107873	0.102953	0.303961	0.0597289	0.134515	0.476814	1.89656	1.27305	0.263178	0.722808	0.745655	0.426111
AT1G02205.1	-0.697057	0.8557	1.50377	2.41524	1.42991	-0.251539	4.20671	4.00248	0.836185	1.0047	0.477604	-0.178108	-0.638261	0.38405	0.569856	-0.664622	0.456286	0.747307	1.62352	2.78552	-0.174605	1.18903	0.459432	-0.204618
AT1G02205.2	-0.837539	0.571985	1.39819	2.2344	1.17801	1.06283	3.7959	5.1709	0.339089	0.512381	0.319517	0.0067809	-0.725424	-0.0832903	-0.978528	-0.404484	0.226837	0.154586	1.4903	2.59623	-0.54722	0.686842	2.14173	3.44637
AT2G42840	-0.668992	0.0326044	-1.03598	-1.75359	0.290373	0.405864	-0.018038	-0.0464097	0.0559749	-0.143606	0.0924675	-0.345022	0.435207	0.843742	-0.00544112	-0.536631	-0.108517	-0.156857	-0.0195374	-0.158808	-0.25809	0.423333	-0.831356	-1.75365
AT2G35860	-0.103536	-0.391498	-0.754275	-1.38608	0.0685945	-0.353865	-0.223031	-1.26935	0.401035	-0.227288	0.676586	-0.498971	0.540978	0.310638	0.687651	-0.19518	-0.19147	-0.381004	0.0156549	0.195573	-0.0362783	0.234035	-0.178267	-1.54865
AT2G04850	-0.0560622	0.109438	0.75417	1.36999	-0.285145	-0.445074	-0.0600681	-0.847269	0.181701	0.0887437	0.897093	0.398434	0.252826	-0.852111	-0.035655	-0.172886	0.0253729	0.302614	1.32847	1.26678	-0.177057	-0.690658	-1.08798	-1.20086
AT2G01820	-0.129078	-0.144311	-0.450738	0.0886524	-0.0488585	-0.0849712	-0.23239	-0.251303	0.114676	-0.171202	0.0784387	0.0922137	-0.0608059	-0.116068	-0.200673	-0.0496051	-0.0615632	0.0724594	-0.184792	0.16938	0.117185	0.146557	-0.00680049	0.267173
AT2G04160	-0.314267	0.144664	0.450642	0.607054	0.00271362	-0.0685731	-0.247217	-1.32014	0.256966	0.400335	0.561512	0.430548	0.164215	0.0225533	0.197326	-0.311732	-0.100146	0.152927	0.43372	0.608873	-0.0572084	-0.149541	-0.0546131	-0.454705
AT2G04280	-0.136843	-0.543275	-1.03438	-1.13358	-0.395806	-0.535694	-0.775566	-1.06556	-0.272618	-0.51439	-0.265094	-0.214843	-0.314834	-0.440162	-0.314001	-0.389413	-0.170796	-0.417065	0.0778416	0.349341	-0.343501	-0.516656	-1.1365	-1.59246
AT2G47160	-0.400669	-1.28453	-1.40948	-1.95824	-0.510608	-0.466612	-0.563893	-1.43615	0.551385	-0.348438	0.577645	0.0997262	-0.615846	-0.923225	-0.0193899	-0.361052	-0.186065	-0.599552	-0.820011	-0.429398	-0.531631	-0.783968	-0.823955	-1.10397
AT1G24020	-0.79386	-0.48821	-1.27736	-1.60896	-0.244047	0.0828264	-1.39315	-1.3007	-0.0801619	-0.47582	0.116955	0.0478845	-1.11994	0.850597	-0.536019	-0.538317	-0.0699358	-0.336556	0.239957	0.622411	-0.16243	0.309887	-3.15134	-1.65349
AT1G75500	-0.334228	-0.344028	-1.20601	-1.10251	-0.120876	-0.399466	-1.10557	-1.50335	0.210205	-0.317739	0.271016	0.225943	-0.0132003	-0.608214	0.168213	-0.0911104	0.203219	-0.100203	-1.20781	-0.231833	-0.0847746	-0.326711	-1.31443	-1.64582
AT1G14920	-0.897198	-0.276671	-1.00325	-0.847367	0.174241	0.0294306	0.06819	0.0543663	-0.56615	-0.52324	-0.364222	-0.199709	-0.0528217	0.35077	0.172189	-0.183347	-0.350042	0.163701	-0.151606	-0.295227	0.229088	0.300892	0.314892	-0.0937411
AT1G20950	0.0588498	0.023962	-0.591506	-1.26735	0.0101939	-0.113302	-0.476755	-1.0549	0.154701	-0.0786462	-0.527004	-0.377982	-0.12389	-0.417312	-0.28918	-0.274298	0.0831294	-0.0999495	-0.592792	-0.136136	0.0497973	-0.202385	-0.795847	-0.858688
AT1G72970	-0.534271	-0.620556	-1.28473	-2.25791	0.370871	0.648724	-0.0835033	-0.0322273	-0.141268	-0.379359	-0.289478	-0.380802	0.23715	1.01783	-0.0312989	-0.0782164	-0.11215	-0.522337	-0.264104	-0.120544	0.104056	0.566021	-0.247999	-0.359834
AT1G72810	-0.143014	0.18259	-0.284634	0.045247	-0.282926	-0.136805	-0.588225	-0.361828	-0.115178	0.110314	0.38616	0.449029	-0.426045	-0.133443	0.160183	0.206694	-0.117752	0.259832	0.0420566	0.159131	-0.317595	0.0764129	-0.701202	-1.31215
AT1G68560	-0.12688	0.126149	-1.41201	-1.39442	-0.127554	-0.327092	-0.244628	-1.41862	-0.150121	-0.0968872	0.351364	0.0407662	0.13838	-0.575428	0.16182	-0.139932	-0.287376	0.150299	-1.06965	-0.979517	-0.263373	-0.266157	-0.163419	-1.14737
AT1G74720	-0.33755	-0.180022	-0.325459	-0.332715	-0.0221053	0.0226675	-0.54641	-0.313339	0.0607199	-0.197095	-0.000965585	-0.0165816	-0.124555	-0.0245194	-0.105044	0.0462488	-0.0250495	-0.152431	0.00939918	0.0181784	-0.0165078	0.288119	-0.613402	-1.28521
AT1G78060	-0.216013	0.169346	-0.304122	-0.3185	-0.146683	-0.146764	-0.123922	-0.158888	0.399105	0.213485	0.251797	0.209935	0.0595463	0.0244723	-0.10067	0.749882	0.259257	0.134681	0.380739	0.629632	0.140516	0.0154044	-0.678011	-0.202367
AT1G80080	0.0788182	-0.369765	-0.520484	-0.755559	0.791346	-1.35107	0.807355	0.444816	-0.00150098	-0.319595	0.0653661	-0.375207	-0.364723	-0.263958	0.554589	-0.172975	0.159982	0.0155684	-0.0306138	-0.335814	0.0762577	-1.90833	-0.287282	-0.613425
AT1G65900	-0.234251	0.657475	-0.645788	-0.217156	-0.0978858	-0.413628	-0.193788	-0.876208	0.290185	0.471832	-0.350609	-0.304921	-0.0826209	-0.756756	0.0796538	-1.0055	0.217406	0.302542	0.543591	0.0463006	-0.142252	-0.418744	-0.496663	-0.987431
AT1G10640	-0.775444	-0.144099	-0.761775	-1.34042	-0.0679719	-0.181475	-0.254031	-0.87409	0.27537	0.534557	-0.722803	-1.07293	-0.892683	-0.325315	-0.0641519	-0.680715	-0.108699	0.0897676	1.04283	-0.11947	0.503162	0.608765	-0.378274	-0.791396
AT1G08190	-0.173305	-0.256879	0.310901	0.681157	0.00298517	0.420957	0.629745	0.487921	0.151566	0.196838	0.155967	0.289816	0.198237	0.0148187	0.0783592	0.0509412	-0.181815	-0.0345934	0.567648	0.928888	0.0312232	0.409335	0.306198	-0.00363723
AT1G01900	-0.0718723	-0.00728268	0.441502	0.660997	-0.130074	0.427206	1.14688	1.68447	0.0751159	-0.270742	1.03405	0.409895	0.117368	0.297124	0.69883	-0.443661	0.113182	-0.39897	0.605659	0.678893	-0.587776	-0.136893	-0.120438	-0.158164
AT1G71770	-0.193721	-0.231455	-1.05673	-0.0880698	-0.241008	0.354738	0.0665181	1.0215	-0.509782	-0.278412	-0.322469	-0.0842908	-0.469298	-0.192995	-0.400155	-0.0110879	-0.174638	0.0107264	0.0275507	-0.322495	-0.634587	-0.0456719	-0.433136	0.819683
AT1G14440	0.387545	-0.342325	-1.04447	-1.23345	-0.446462	0.42346	1.19652	0.149329	0.144918	-0.0426515	-0.348144	-0.423334	-0.829466	-0.431785	-2.76876	0.00592483	0.28754	-0.00717136	-0.320232	-0.220348	0.483336	0.0348354	0.616071	0.271175
AT1G28440	-0.239484	-0.0612841	-0.488832	-0.698673	-0.120192	-0.0961613	-0.446158	-0.445566	-0.219766	-0.294267	-0.0256522	-0.0457733	-0.499097	-0.48661	-0.0535089	0.0127166	0.0609103	0.082774	-0.0847407	-0.0149386	0.0639131	0.240107	-0.498424	-0.872207
AT1G79620	-0.415772	0.0292998	-0.359004	0.415898	-0.711668	-1.00116	0.635011	-0.158946	0.440689	0.330672	0.94898	0.823939	-0.194111	-0.360671	0.130343	-0.307366	0.471515	0.202523	0.351552	0.919543	-0.522411	-0.526578	-0.261725	-1.08317
AT1G41830	-0.329528	-0.0759877	-0.15446	-0.194025	-0.334685	-0.355204	-0.398777	-1.12957	0.420911	0.359724	0.406413	-0.0723824	0.153751	-0.0855518	0.10682	-0.63832	-0.0211223	-0.197718	0.507205	1.02739	-0.438544	-0.386362	-0.701457	-1.05669
AT1G01300	0.0271174	-0.400025	-0.625378	-1.19728	0.0297435	-0.538503	-0.800548	-0.876943	0.296814	-0.674422	-0.376573	-0.694149	0.11925	-0.269398	-0.35589	-0.333497	0.116019	-0.396482	-0.795521	-0.541698	-0.27473	-0.384478	-1.32413	-2.07583
AT1G26570	-0.0579762	-0.308222	-0.714309	-1.38141	0.198032	-0.106288	-0.43923	-0.331982	0.149593	-0.136621	-0.53995	-0.644055	-0.0942406	-0.180764	-0.28156	-0.551907	-0.320921	-0.444538	-0.231573	-0.28536	-0.121938	-0.486531	-0.440591	-0.215729
AT1G15000	0.359851	0.404054	-0.63771	-0.951774	-0.180318	0.0852289	-0.154954	-0.403268	0.670268	0.311085	0.162786	-0.484238	-0.147748	-0.0233006	0.379383	0.222515	0.625152	0.353297	-0.381167	-0.667294	-0.00629163	-0.0217238	-0.90441	-1.18653
AT1G53300	-0.0313456	-0.0182526	-0.334536	-0.865666	0.354386	0.377893	-0.341082	-0.860758	0.691086	0.46529	0.182024	-0.150578	-0.00149287	0.673115	0.252188	-0.34795	-0.160338	-0.336041	-0.052721	0.0428045	0.106702	0.233916	0.539102	0.771288
AT1G53240	0.512783	0.11565	-0.457451	-1.33266	0.240284	-0.10455	-0.308924	-0.828438	0.614558	0.237725	-0.130104	-0.369699	0.308972	-0.187136	-0.00350399	-0.276363	0.212353	-0.0288707	-0.625748	-0.598351	0.00924912	-0.334973	-0.951704	-1.40379
AT2G47240	-0.367029	-0.509338	1.03305	0.312112	0.877844	0.242405	0.62961	0.0606908	-0.370783	-0.729374	-0.734888	-0.689586	0.0820867	0.215966	0.122619	0.135149	-0.604675	-0.449067	-0.500214	-0.48991	0.0873966	0.0941109	-0.18907	-0.22512
AT1G51460	-0.371684	0.0270879	-0.418941	-1.11916	0.278473	1.05827	0.231757	0.283345	-0.0225262	-0.0966655	-0.551352	-0.331833	-0.240533	0.975063	0.0740977	0.209361	0.0196817	0.227072	0.0458854	0.0605202	-0.183756	1.04225	0.397449	0.875263
AT1G51570	0.12392	-0.0512225	-0.754791	-0.993892	0.313249	0.116403	-0.139636	-0.260189	0.00505992	-0.103694	-0.281027	-0.264885	0.0244843	-0.0460438	0.098441	-0.0839099	0.0905593	0.107637	-0.448308	-0.366376	0.156159	0.0681462	-0.358855	-0.912345
AT1G69690	-0.742696	-0.515043	-1.11777	-1.47519	0.253622	-0.287729	-0.21513	0.0975538	-0.109759	-0.344564	0.355104	-0.117702	-0.174414	-0.59719	-0.0198512	-0.0622619	0.0531056	-0.0185652	-0.0713955	0.0741272	-0.164099	-0.544182	-0.219625	-0.561353
AT1G69295	-0.0640213	0.0565406	0.904977	1.21623	0.481288	0.887935	1.3153	1.47694	0.574901	0.105811	0.23475	-0.0826611	-0.0408172	0.349225	0.167061	0.547341	-0.153077	-0.113803	1.19795	0.783333	0.286283	0.604093	0.851578	0.90924
AT1G80310	0.112821	-0.0679041	0.866687	1.21186	-1.00141	-0.919373	-0.556963	-0.00883118	-0.310411	0.375911	0.523082	0.486216	-0.727142	-0.583977	-0.0200149	-0.0168701	0.344664	0.488371	0.665742	0.430091	-0.455703	-0.343759	-0.550417	-0.781083
AT1G68400	-0.279313	-0.0558881	-0.794936	-1.31486	-0.144262	0.0341416	-0.846487	-0.701639	-0.417016	-0.0113062	0.16586	0.0501761	-0.366109	0.141258	0.0841497	0.142753	-0.245709	0.144697	-0.197138	-0.373484	-0.0692312	-0.00526928	-0.280776	-0.0949418
AT1G72290	-0.272685	-0.291049	-0.374603	-0.835189	0.379009	-0.015348	-0.0855757	-0.257011	-0.597035	-0.156119	-0.433798	-0.430435	-0.620991	-0.343074	-0.185111	-1.00605	-0.357427	-0.656046	-0.122484	0.148323	-0.930535	-0.249359	1.21373	0.104758
AT1G64390	0.0919616	0.815637	0.427507	-1.09906	0.474041	0.34345	-0.881636	-1.2535	2.23755	0.92346	-0.120658	-1.13287	-0.0852114	-0.670519	-1.05166	-0.253656	0.809598	0.724618	1.60987	0.825212	0.380315	0.767224	0.162655	0.017308
AT1G55260	-0.112521	-0.194628	-0.444964	-1.12045	0.462129	0.464189	-0.296444	0.938065	0.158461	-0.142634	0.495369	-0.514232	-0.0685617	0.460731	-0.188745	0.282505	-0.0102829	-0.0151599	0.322571	-0.170451	0.0382418	0.439592	-0.713743	-0.739949
AT3G07540	-0.414213	0.0563079	-1.35045	-1.65737	-0.00802758	-0.131479	-0.703517	-0.278311	0.1973	0.467494	-0.122074	0.416067	-0.476514	0.392614	-0.11571	0.614323	0.144734	0.163607	-0.9966	0.117038	-0.131177	0.542009	-0.868237	-1.36549
AT3G10080	-0.465075	-0.202239	-0.681206	-0.57586	-0.140595	-0.465255	-0.171325	-0.708091	-0.224382	-0.474721	0.0934698	0.0375728	-0.0724369	-0.759206	-0.123075	-0.0800943	-0.119	-0.00849241	-0.171388	-0.0280337	-0.128728	-0.572376	-1.62283	-1.30149
AT3G05600	-0.591825	-0.236227	-1.2533	-1.64084	0.99949	-0.602512	0.0740006	0.447377	0.0880152	-0.240046	-0.913136	-0.236269	-0.504117	-0.577798	0.323096	0.350977	-0.133277	-0.322016	0.200322	0.645995	0.154653	-0.433627	0.227557	0.722466
AT3G02110	-0.355964	-0.288058	-0.957904	-1.46455	0.653414	0.290726	-0.0446949	0.346459	-0.233894	-0.400211	-0.262145	0.0175417	0.132197	0.346368	0.0777318	0.12599	0.10143	-0.112243	-0.375976	-0.474374	0.106049	0.412681	-0.022958	-0.137802
AT3G08680	-0.257144	-0.349222	-0.795288	-1.48107	-0.123891	-0.254036	-0.733678	-0.847345	-0.0445899	-0.188159	0.0468948	-0.196899	0.0146924	-0.126632	0.090086	-0.265856	-0.0181383	-0.186315	-0.21793	-0.0588956	-0.136421	-0.289163	-0.602801	-0.528472
AT3G08770	-1.39906	0.261438	-0.464922	-0.894263	0.560334	0.681916	-0.394703	-0.300354	0.205848	0.255073	-0.435014	-0.581952	0.068181	0.687093	-0.24089	-0.192332	0.0999349	0.165508	0.0860846	0.571142	-0.303774	0.528468	-1.08097	-2.74837
AT3G04290	-0.377673	-0.334167	-1.67221	-2.2452	0.872539	2.13124	-0.0742424	0.994918	-0.154129	-0.645775	-0.270652	-0.420679	0.00264958	2.33696	-1.14487	-0.174498	0.107242	-0.328475	-0.632973	-0.228864	1.60777	1.09954	-0.755462	1.53542
AT3G14240	-0.194972	-0.286349	-1.28679	-1.64802	-0.347732	-0.116196	-0.40947	-0.372484	-0.345191	-0.274013	0.397356	0.107455	-0.0324003	0.319052	0.438554	0.303558	-0.494156	-0.0405787	-0.9984	-0.791584	-0.150302	0.343196	-0.611811	-1.29345
AT3G16060	-0.176766	-0.173451	-0.192033	-0.201111	0.0289992	0.162414	0.0155985	-0.430778	0.0168327	-0.0547421	-0.0153325	-0.0470535	-0.0610143	-0.115603	-0.159096	-0.260021	-0.173197	-0.040131	0.339965	0.476644	0.0641263	0.0217429	-0.49027	-1.19826
AT3G17840	0.167514	0.366025	-0.85919	-1.30377	0.281898	0.204771	-0.598687	-0.576593	0.70975	0.29544	0.227013	-0.216908	0.37822	0.324765	0.117016	0.162195	0.447762	0.0711407	-0.216142	-0.0872125	0.335529	0.266498	-0.310726	-0.232862
AT3G21190	-0.495806	-0.33629	-0.81864	-0.650428	-0.174986	-0.600149	-0.520669	-0.950127	-0.0573033	-0.149181	0.00201109	-0.205013	-0.192527	-0.803583	-0.295501	-0.471556	-0.0787661	-0.149591	-0.0929082	0.790972	-0.134815	-0.507407	-0.6237	-1.4876
AT3G21750	-0.149705	0.548928	1.29731	1.25109	0.613544	1.10148	1.52619	1.64226	0.899865	0.570612	1.1005	0.353624	0.200271	0.35078	0.712037	0.494574	0.221318	0.522799	0.714165	0.348837	0.420279	0.823953	0.493613	0.431105
AT3G19820	0.105794	-0.229798	-0.770614	-1.77079	-0.0163382	-0.0792359	-0.220507	-0.87756	0.340134	0.0204526	0.308903	0.199687	0.150121	-0.245255	0.0665383	0.0101128	0.047322	-0.0329941	-0.496059	-0.473867	0.226855	0.074654	-0.831883	-1.79817
AT3G27020	-0.118814	0.043215	0.519237	0.970869	-0.00245269	0.401272	0.437412	0.386567	-0.0191668	0.0416234	0.211066	0.442351	-0.388934	-0.170978	-0.086102	-0.0750965	0.197087	0.236593	0.392747	0.201336	0.0112501	0.332569	-0.479783	-1.11596
AT3G18490	-0.116871	0.317306	0.482132	0.92533	-0.211226	0.585881	0.394913	1.02423	0.607824	0.726544	1.01131	0.600202	0.0593356	0.731961	0.485066	0.666768	0.360977	0.585007	0.69618	0.821147	-0.0322582	0.677224	-0.436071	-0.384728
AT3G26140	0.0460851	-0.141014	-0.764149	-0.790365	0.329023	0.237266	0.183722	-0.452752	-0.308037	-0.782837	-0.437521	-0.581431	0.229646	-0.801294	0.266727	-0.65501	-0.559788	-0.0491769	0.229785	-0.299871	-0.576966	-0.700673	-0.102443	-0.0398608
AT1G55360	-0.219999	-0.308448	-0.797458	-0.734787	-0.0754132	-0.376588	-0.878787	-1.01947	-0.276185	-0.322582	-0.0855417	-0.179696	-0.0607274	-0.178898	-0.060393	-0.129152	-0.278394	0.0864096	-0.253881	-0.39632	0.211727	-0.139083	-0.892019	-1.2976
AT3G15095	-0.299928	-0.235051	-0.944955	-0.311172	-0.0802062	0.236676	-0.119078	-0.142321	-0.212028	-0.277232	-0.236438	0.206611	-0.0887893	0.0285006	0.0622708	-0.0431226	0.217416	0.133889	-0.212561	-0.136068	0.0059194	0.0966519	0.243039	-0.135767
AT3G14067	-0.224232	0.452831	1.83078	2.69455	-0.471401	0.306588	1.07663	1.16777	0.625199	1.19244	1.17937	0.58862	-0.0945403	0.129369	0.304192	0.156776	0.352301	0.703712	1.90289	1.22713	0.000286435	0.541823	0.0312813	-0.814959
AT3G13510	-0.170406	-0.223967	-0.426719	-1.12131	-0.190182	-0.277651	-0.505876	-0.367885	-0.0998107	-0.190096	0.0722906	0.0137118	-0.274285	-0.15061	-0.0929377	0.15799	0.0175327	-0.032459	-0.188875	-0.565057	0.0242246	-0.0604496	-0.691132	-0.59021
AT3G18850	-0.205885	0.211327	-0.882551	-0.583737	0.261784	0.498568	-0.151023	0.14975	0.124427	0.0248747	-0.36473	-0.401631	0.0682931	-0.220469	-0.232693	-0.161767	0.238202	0.559689	0.156965	0.390956	-0.185798	0.0423415	-0.337267	0.345209
AT3G20015	-0.710446	0.369811	-0.541769	-0.965699	-0.831025	-1.2751	-0.938146	-0.255163	-0.261688	0.099153	-0.240305	0.00251468	-1.10077	-0.696073	0.312076	0.156703	0.133023	-0.0520798	-0.121495	-0.249278	-0.761344	-1.25699	-3.09414	-3.26098
AT1G30330	-0.333075	-0.47057	-0.149042	-0.390268	0.2028	-0.454461	-0.678267	-0.649864	-0.129427	-0.532376	0.172561	-0.202019	-0.093379	-0.515262	-0.0635681	-0.138442	0.185213	-0.321668	-0.25246	-0.276464	-0.194568	-0.582163	-0.927457	-1.4099
AT1G07080	0.0345878	-0.272479	0.426292	0.972446	-0.0168316	-0.0741749	0.214181	0.414631	0.191485	-0.00781645	0.231684	0.28107	-0.000643751	-0.139066	0.277926	-0.0799271	0.117138	0.0204329	0.468357	0.524315	-0.254827	-0.293102	-0.205859	-0.379026
AT1G58360	0.149556	0.374163	0.636272	2.15687	-0.14272	1.54618	1.29584	2.18744	0.115562	0.494037	1.16387	0.907897	-0.295051	0.912046	0.0909328	0.842961	0.072559	0.121585	0.575368	2.12851	0.122841	1.4771	1.90356	2.12499
AT1G67040	-0.385401	-0.0195983	-0.747447	-2.02637	0.240393	0.152462	-0.699444	0.438897	-0.158417	-0.0753477	-0.231747	-0.55134	-0.548923	0.141397	-0.685572	0.410104	-0.0952757	0.130966	0.00198787	-0.461743	0.168741	0.587003	-0.646656	-1.71491
AT1G19920	-0.0855437	-0.0576777	-0.676904	-1.01622	-0.370387	-0.440665	-0.751408	-0.67223	0.16526	-0.0217203	-0.0595264	-0.191586	-0.30624	-0.442798	-0.0522669	-0.0796571	-0.0242023	-0.0372293	-0.384081	-0.0664022	-0.495349	-0.50992	-0.650466	-0.690209
AT4G00430	-0.311821	-0.272152	0.275712	0.318847	-0.0546791	1.00335	0.465136	1.24788	0.144102	0.116061	0.0075157	-0.0588366	-0.391102	0.225165	-0.108051	-0.138677	-0.0357039	0.0305091	0.432953	0.456164	0.0853453	0.453432	0.0720659	0.160233
AT4G00740	0.180136	-0.0200705	-0.141993	-0.42414	-0.170659	-0.111585	-0.437882	-0.888347	0.344328	-0.036146	0.140657	0.234586	0.0341245	-0.270097	0.0930416	-0.159136	0.37933	0.0131956	-0.219389	-0.0105122	0.10704	-0.138865	-1.23643	-2.18592
AT4G02680	0.0195222	-0.399745	-0.583782	-0.321941	-0.234871	-0.552668	-0.840766	-0.832307	-0.0524951	-0.36831	-0.178959	-0.0119461	-0.0889855	-0.162729	-0.294219	-0.0268325	0.133647	-0.196267	-0.265635	-0.106784	-0.0484322	-0.301213	-1.28947	-1.80381
AT4G04890	-0.0869747	-0.103476	-0.157134	-0.731626	0.219141	0.105757	-0.374423	-0.103134	0.460354	0.0851337	-0.149665	-0.117655	0.46281	0.442083	0.283509	-0.468644	0.195771	0.445969	0.0438684	0.0555045	-0.0209683	-0.00688554	-0.440048	0.0128853
AT4G22130	-0.036731	-0.150167	-0.418038	-0.843064	-0.309599	-0.128672	-0.681204	-0.87743	0.308533	0.145061	0.303932	-0.0122107	-0.139773	-0.122569	-0.237472	-0.276176	0.0192053	-0.18129	-0.207158	0.187848	-0.196743	-0.0721332	-0.0672087	0.39303
AT4G23490	-0.0944741	0.250598	-0.11935	-0.361868	0.0813927	-0.210838	-0.0769337	-0.423189	0.511584	0.45726	-0.319215	0.167163	-0.165928	-0.266853	0.0217853	-0.52478	0.22281	0.0599342	0.436794	0.684429	-0.216065	-0.279584	-1.01889	-1.49228
AT4G29030	-1.11338	0.0346385	-0.63534	-1.44125	0.0587264	0.677942	-0.394704	0.0547978	-0.0532913	0.0362074	-0.368348	-0.745542	0.413992	0.670799	0.526679	0.528001	-0.311782	-0.142072	0.0312915	-0.0190935	1.2578	0.715035	-0.373605	-0.953498
AT4G29130	0.0593242	-0.00108241	0.734686	0.785999	0.0336641	0.0347736	0.0273399	-0.457191	0.547062	0.342035	0.778143	0.269696	0.0233637	-0.0955329	0.00589081	0.0706947	-0.0374669	0.0345008	0.445776	0.570731	-0.00736878	-0.0649111	-0.113105	-0.500622
AT4G29680	-0.512906	0.0529302	-0.183194	0.133673	-0.227834	-0.30653	-0.39869	-0.661256	0.0227764	-0.18305	-0.0151401	0.0558798	-0.0367471	-0.320751	-0.211257	-0.266554	-0.110022	0.156383	0.0449514	0.0746093	-0.09441	-0.138317	-0.84807	-1.51032
AT4G29720	0.229812	-0.240918	-0.366363	-0.629417	0.237868	-0.541356	-1.04938	-0.797329	0.270899	0.15571	0.191297	-0.305432	-0.620712	-0.524075	-0.301997	0.184038	0.344499	0.0135379	-0.107969	-0.254932	0.404484	-0.279229	-0.433347	-0.656493
AT4G34980	-0.30314	-0.0668059	-0.445042	0.16156	-0.22688	-0.570788	-0.489063	-0.907718	0.402515	-0.0373379	0.278878	0.13467	-0.0995477	-0.0127815	0.138525	0.0708751	0.215338	0.283814	0.107016	0.319742	-0.359871	-0.531929	-1.32163	-2.10663
AT4G36360	0.11222	0.182961	0.212013	-0.362625	0.274912	0.22121	0.637639	0.368882	0.661551	0.366807	0.661468	-0.335395	0.338903	0.0203468	-0.231491	-0.139948	0.366076	0.263771	0.460563	0.533257	-0.0150337	0.278263	-0.105018	-0.811582
AT4G36250	-0.0774963	-0.240095	-0.130693	-0.331101	0.148315	0.357725	0.0659021	0.397006	-0.00994387	-0.240666	-0.019596	-0.328349	-0.00339538	0.289192	-0.120792	-0.181775	-0.144457	-0.00908773	0.12981	0.104749	0.00487535	0.248656	-0.304296	-0.178223
AT4G38220	0.314206	0.263099	0.0994084	0.129423	-0.180709	-0.132685	-0.113783	-0.262536	0.26161	0.116495	0.45864	0.0853732	-0.0252993	-0.182042	-0.0792894	0.0047845	0.0572897	0.304244	0.0634489	0.292858	-0.10349	-0.121382	-0.594525	-1.31204
AT4G38250	0.107658	-0.0187172	-0.0666865	0.308336	0.0190035	0.122559	0.208846	0.0732244	0.314313	0.262879	0.366842	0.470143	-0.150418	0.129094	-0.0579974	-0.220221	0.237516	0.212435	0.154941	0.473244	0.10846	0.423029	0.0948247	-0.0390415
AT4G38660	-0.15845	-0.125356	-1.57812	-2.49311	0.19731	-0.298273	-0.862899	-1.37198	0.389759	0.129265	0.264882	-0.22005	0.304737	-0.00911445	0.225909	0.131606	0.233693	0.0252184	-1.01048	-0.615973	0.105845	-0.177728	-0.698734	-1.32247
AT4G39330	-0.163712	0.0628651	1.14121	0.679979	0.188586	0.911434	1.18592	1.11176	1.00756	0.565151	-0.026445	-0.548714	0.094675	1.16181	0.0847322	-0.387383	0.288029	0.288793	1.28098	1.12537	-0.0978094	0.89496	-0.121037	-0.212847
AT3G49670	-0.561308	-0.467784	-1.16808	-2.23328	0.124019	-0.1164	-0.909639	-0.661714	0.414674	-0.845275	-0.0116965	-0.315319	-0.31367	-0.519705	-0.145811	-0.144317	-0.141744	-0.0746697	-0.681227	-0.887848	-0.102553	-0.0798451	-0.728433	-0.857423
AT3G51950	-0.161175	-0.0593952	-0.527037	-0.512979	-0.300303	-0.615918	-0.673723	-0.861409	0.23938	0.0570946	0.0818417	0.0436381	-0.555724	-0.531853	-0.191465	-0.151465	0.174148	0.126504	0.0916849	-0.233737	-0.515008	-0.300602	-0.835229	-0.626067
AT3G56370	-0.357942	-0.150287	-0.768646	-1.62823	-0.0444719	0.391973	-0.205803	-0.605008	0.563892	0.282522	0.275999	-0.252348	-0.079979	0.248808	0.113254	-0.108093	0.0624354	-0.112305	0.224876	0.00731814	0.086978	0.501304	-0.386011	-0.503286
AT3G59420	-0.243399	-0.312238	-0.430571	-0.323089	0.33542	0.752843	-0.0243525	-1.05845	0.40105	0.0860833	0.63928	-0.0579997	-0.372538	0.0624887	0.206203	-0.409321	0.131462	-0.498377	0.589699	0.259937	0.0986552	0.371573	-0.233373	-1.13277
AT3G59140	0.0659273	-0.256586	0.560951	-0.172963	-0.0753555	0.666225	1.62537	0.350219	0.00654015	-0.164875	-0.325779	-0.260792	-0.0498737	-0.0446969	0.782283	-0.0449686	0.184877	0.160098	0.0302555	0.164748	0.0697132	0.0387801	1.25635	0.7194
AT3G61820	0.0398536	-0.0818292	-0.429269	-0.778157	0.00161582	-0.0340774	-1.3228	-0.520167	1.04054	-0.0925087	0.722485	-0.0597902	0.213156	0.0552709	-0.0010071	0.323948	0.210807	-0.0285483	0.00849444	-0.088896	-0.150817	0.197686	-1.26216	-0.978412
AT5G01090	-0.151529	-0.146822	-0.783291	-0.674363	0.218659	-0.00200429	-0.424815	-0.159367	0.22092	0.0684254	-0.122598	0.069537	0.238153	0.0558363	0.131735	0.24698	0.0492202	0.140632	-0.212266	0.0291777	0.102183	0.0405745	-0.396724	-0.3338
AT5G01020	-0.238747	-0.168794	-0.332482	-0.455372	-0.397561	0.0624104	-0.0963907	-0.48891	-0.0547069	-0.0784775	0.10033	0.290085	0.0703812	0.168979	0.287173	-0.0293366	-0.0352743	0.214192	0.119432	-0.0980677	-0.0315018	0.217697	-0.373551	-0.965441
AT5G01890	0.378384	0.0616877	-0.481137	-1.16817	-0.0203595	0.201929	-0.023459	-0.335096	0.826781	0.254105	0.766456	0.00565435	0.232728	0.516782	0.57489	0.166753	0.405932	0.0993362	0.380415	-0.0162482	-0.155444	0.37385	-0.318541	-1.0953
AT5G03170	-0.135529	-0.0728913	-0.199852	0.0838118	-0.27816	-0.167135	0.0130658	-0.429419	-0.0926313	-0.232588	0.0570406	-0.135724	-0.220465	-0.69883	-0.0399227	-0.879769	0.224997	0.1126	0.387091	0.442842	0.123206	-0.489089	-0.702979	-0.557796
AT5G07030	-0.475058	0.302449	-0.251723	-0.988724	0.254115	-0.122124	0.1177	-0.786334	0.683562	0.450563	0.931087	-0.0194219	0.455667	0.15967	0.737112	-0.331985	0.608017	0.204853	-0.00625084	-0.0136362	-0.178545	-0.142138	-0.795137	-1.53968
AT5G07180	-0.698596	0.236573	-0.51856	-0.739109	0.0549665	0.145851	0.860764	0.495527	0.241445	0.682759	1.02185	0.605874	-1.4011	1.14585	-0.608232	0.0692627	-0.112406	0.253717	0.348857	0.657034	-0.285621	-0.554589	-0.210897	0.902153
AT5G07800	-0.394386	0.0380084	-0.191202	-0.171043	0.15985	-0.409888	0.402982	0.204325	-0.237643	-0.180031	0.23659	-0.156253	-0.0251456	-0.631247	-0.249139	-0.0940199	-0.014855	0.0169706	0.407202	0.442603	-0.410371	-0.223123	-0.00161511	-0.640818
AT5G08000	-0.51868	0.075443	-0.627243	-0.817629	0.797846	0.487806	-0.392583	0.70017	0.225131	-0.0531982	-0.328394	-0.498029	0.378816	0.882239	-0.116892	-0.108401	-0.0126992	0.0286418	-0.0831056	-0.299481	-1.09727	0.805858	-0.384464	0.639215
AT5G09760	-0.164256	0.144567	-0.114503	-0.815607	0.207621	0.154475	-0.457651	-1.01698	0.525958	0.496405	-0.0819903	-0.265376	0.168326	0.303622	0.0311536	-0.682376	-0.0822899	0.0707353	-0.00507099	-0.335157	-0.160037	-0.4089	-0.733885	-0.942983
AT5G10930	-0.355464	0.790085	2.48398	2.93179	1.05917	2.10756	1.74954	1.24509	1.46875	1.09569	0.315638	0.0361433	-0.638865	-0.055744	0.0219379	0.252378	0.786765	0.449388	2.60217	2.3306	0.714756	1.39964	1.14789	0.531282
AT5G13640	-0.179009	-0.126115	-0.0163785	0.649238	-0.103564	-0.000169506	-0.112952	-0.0342052	-0.237065	0.0454068	0.275422	0.426305	-0.260898	-0.138413	-0.0890039	0.189168	-0.0877991	0.0499262	0.368878	0.407997	-0.154676	-0.0625236	-0.45165	-0.706504
AT5G22860	-0.349501	-0.345159	0.800759	1.96232	-0.360083	0.358643	2.01202	2.11499	0.0160895	-0.238471	0.734306	0.450806	-0.15778	-0.15521	1.09116	1.35192	0.422461	-0.0746192	0.590879	1.53618	0.0257117	0.851142	1.37034	1.85752
AT5G23940	-0.762706	0.407058	-0.741593	-1.12199	0.683716	0.580811	0.128495	0.105504	0.396458	0.318913	-0.0583326	-0.44598	-0.143773	0.383075	-0.25091	-0.431493	0.208892	0.402666	0.237324	0.54673	0.0504912	0.406722	0.143131	0.472147
AT5G40150	0.212746	-0.217306	-1.17914	-2.21967	0.253905	0.217868	-0.595677	-0.979072	0.418323	0.228249	-0.11633	-0.625306	-0.25528	-0.276312	-0.166781	-0.412205	0.137227	-0.266296	-0.282256	-0.273517	0.0799172	-0.111978	-0.234596	-0.253671
AT5G41870	0.0295684	0.36264	0.0573802	0.51816	-2.40031	-2.1469	-1.27069	0.22609	0.886726	0.34377	0.47435	0.105056	0.000861825	-0.205162	-0.0663874	1.2306	0.226145	0.109742	0.442287	-0.14426	-0.28134	-0.768977	-1.37022	-1.66793
AT5G43020	-0.767977	0.278546	-0.927466	-0.845988	0.41984	0.286108	-0.988104	-1.39571	-0.075506	-0.0140262	0.109911	-0.242285	0.121256	-0.15295	-0.0829274	-0.698437	0.025743	0.0688129	-0.147566	0.0771738	0.344503	0.0935393	-0.591201	-0.233994
AT5G45670	-0.664488	-0.399361	-2.08749	-3.66812	-0.0283918	0.337512	-1.32306	-1.55829	0.0924355	-0.0975737	-0.735828	-0.298146	-0.0807096	1.16375	-0.762308	-0.232603	0.0127327	-0.291704	-0.532997	-0.770212	-0.383312	0.719982	-1.04046	-0.561536
AT5G47640	-0.248454	1.83389	2.6418	1.9027	2.05713	2.90013	1.83887	1.31521	1.6103	2.63395	-0.0243182	0.11176	0.0728045	0.48118	-0.0688664	-0.122632	0.204507	1.50618	2.85141	1.43852	1.92704	2.32826	2.65667	2.65391
AT5G47780	-0.27179	-0.64477	-1.04888	-0.676004	-0.362895	-0.449821	-0.565389	-0.527206	-0.732124	-0.822543	0.00820174	0.187798	-0.152346	-0.13667	0.157738	-0.0171626	-0.39186	-0.483219	-0.695131	-0.475205	-0.280403	-0.33097	-0.803296	-1.54999
AT5G48360	-0.558222	0.0548713	-1.32299	-1.4016	0.135188	0.134653	-0.422437	-1.18111	-0.188859	-0.108885	-0.368245	-0.310965	0.0532445	0.223844	0.0149868	-0.37149	-0.146963	0.0701862	-0.148126	0.310962	-0.0985751	0.00219867	-0.935057	-1.10857
AT5G49180	1.0171	0.331095	-0.485292	0.557243	0.185136	-0.984117	-0.261585	0.668309	-0.0551096	0.286269	-0.764658	-0.282831	-0.591061	0.390542	-0.334671	-0.776723	-0.787826	0.0752146	0.503809	0.635721	-0.423488	0.43552	-0.471718	0.425174
AT5G51750	-0.661641	-0.156788	-0.907411	-1.20778	-0.420788	0.704731	-0.0430066	0.12049	-0.478975	-0.313531	-0.716744	-0.602999	-0.232735	0.738375	-0.178962	-0.538836	-0.163131	-0.0349819	0.124817	0.239337	-0.407093	0.553513	-1.51991	-2.28939
AT5G51560	-0.286414	-0.0392458	-0.757571	-1.78855	0.0471664	0.298639	-0.158287	-0.60677	0.13655	-0.039789	0.0314265	-0.612893	-0.118584	0.0486845	-0.0878538	-0.169595	0.0600079	0.138668	-0.218147	-0.206543	0.217543	0.292487	-0.398521	-0.283213
AT5G51550	-0.713972	-1.04605	-2.04594	-2.27757	-0.386037	-0.391046	-1.07245	-1.29355	-1.87355	-0.921424	-0.025902	0.160852	-0.802611	-0.326927	-0.415336	-0.209925	-0.848889	-1.11103	-1.26577	-0.845634	-0.347592	-0.340436	-1.50368	-2.46875
AT5G53140	0.258901	-0.262541	-0.141752	-0.545033	0.0491359	-0.49737	-0.338778	-0.549726	0.433385	-0.292312	-0.0109342	-0.530198	0.0017225	-0.594076	0.233986	-0.300592	0.0595529	0.0338134	0.135522	0.268576	0.0427108	-0.553633	-0.294631	-0.568867
AT5G55230	0.0857845	-0.12504	-0.974391	-1.25998	0.101493	-0.0436383	-0.200223	-0.455291	-0.0866808	-0.240926	-0.0390836	-0.286285	0.101672	0.0568244	0.127554	-0.115935	-0.00893072	-0.0652068	-0.309981	-0.173669	0.0373275	-0.103773	-0.470173	-0.546393
AT5G55480	0.0189899	-0.26777	-1.17955	-2.60272	0.306928	0.112447	-0.213486	-0.713134	0.248199	0.0914669	0.44912	-0.48298	0.274294	0.0373288	0.10179	-0.389167	0.188252	-0.0665485	-0.677923	-0.196102	0.114144	-0.0598363	-0.438488	-0.710109
AT5G59810	0.730248	-0.0326294	-0.127562	0.0111837	1.30446	0.248456	-0.0395043	0.302299	0.100652	0.19475	-0.392887	-0.619618	0.239436	0.0860839	-0.120972	0.0629431	0.545756	0.488725	0.286605	-0.107577	0.547891	-0.190256	0.171271	0.67319
AT5G60210	0.156627	0.133353	-0.851435	-0.7982	-0.0519495	0.509924	0.0739861	0.267851	0.0687938	0.0182949	-0.331808	-0.247391	0.114462	0.596608	0.163162	0.153173	0.137402	0.251417	-0.0898324	-0.24285	0.0315033	0.475194	0.0707992	-0.0135874
AT5G60490	-0.365655	-0.744316	-0.822716	-0.858945	-0.398805	-0.826643	-0.244944	-0.746909	-0.38733	-0.642432	0.0558634	-0.311929	-0.245535	-0.792761	-0.0337667	-0.738351	-0.077863	-0.459482	-0.178792	-0.129383	-0.340879	-0.924465	-1.07792	-1.1822
AT5G60690	0.0733893	-0.168499	-0.560974	-0.879953	-0.0357439	-0.274728	-0.733383	-0.590485	0.385944	-0.206173	0.192129	-0.197006	-0.289623	-0.431834	-0.0309669	0.20455	0.361558	0.0731547	-0.498249	-0.191194	0.419048	0.117172	-0.371076	-0.239438
AT5G62890	0.0481069	0.0798429	-0.413575	-0.977416	-0.197547	0.0535357	0.142401	-0.0426563	0.340327	0.196109	0.137129	-0.0762869	-0.0151088	0.270005	0.119052	-0.0904531	0.278427	0.199558	-2.70972e-05	-0.339614	0.0242133	0.03996	-0.551303	-0.852766
AT5G63940	-0.139346	-0.131953	-0.0571562	-0.00324444	0.0307724	0.207686	0.208002	-0.426114	0.359811	0.159698	0.23381	-0.00541147	-0.0314798	0.0509078	0.225056	-0.308395	0.372722	0.237557	0.125856	0.110775	0.21059	0.285154	0.0675959	-0.276782
AT5G65700	-0.0575319	0.0252183	-0.812286	-1.10344	-0.0311175	0.167809	-0.18453	-0.345893	0.225615	0.0883869	0.289251	0.0773527	0.042704	0.130527	0.141534	-0.0650331	0.038297	0.299017	-0.555875	-0.638167	0.132924	0.182812	-0.401611	-0.328579
AT5G65990	0.12497	0.115401	1.21987	1.10782	1.24494	2.66345	3.04224	3.0818	0.299962	0.0339961	0.130208	-0.109366	0.70044	1.09186	0.62257	0.663373	-0.00341628	-0.107503	1.3837	1.03633	1.05908	2.59268	3.82821	3.76672
AT5G66560	-0.436498	-0.163814	-0.799144	-1.01609	0.343918	0.145682	-0.080428	-0.469542	0.0413874	0.109612	0.237483	-0.0101887	0.292592	0.111019	0.212682	-0.434358	-0.104275	0.251366	-0.275597	0.271781	0.544324	0.175499	-0.16763	-1.0095
AT5G67230	-0.33445	0.167083	0.796418	-0.0118948	0.937246	1.2815	0.664902	0.796582	0.42152	0.0065379	0.526675	0.285899	0.314797	0.184129	0.0238205	-1.18938	0.491968	-0.00656767	0.968061	0.703783	0.421138	1.21467	2.33278	2.11882
AT5G67360	0.0478461	0.0254026	0.486892	0.586332	-0.0135539	-0.0199636	0.0412397	0.733123	0.360253	0.228844	0.872408	0.198169	0.0747038	0.513471	0.253791	0.518856	-0.114244	0.0178424	0.422715	0.455441	-0.24493	0.25163	-0.913888	-1.30786
AT5G67280	-0.240652	-0.0261799	-0.668912	-0.858325	0.296623	0.306667	-0.452797	-0.344001	0.518828	-0.45452	0.142536	-0.37492	0.0406019	0.297763	0.280804	0.330277	0.164519	0.205326	-0.0125818	-0.0640822	0.0176506	0.56054	0.202235	0.430552
AT5G26230	0.0031047	0.0713936	-0.0948952	-0.50977	0.640397	0.507912	0.0302427	-0.0743133	0.314336	0.130406	-0.180984	0.169117	0.182046	0.334577	-0.135338	-0.0827579	0.234211	0.273889	0.175998	-0.281253	0.360332	0.146687	-0.450734	-0.205695
AT5G26850	-0.0865806	-0.0644466	-0.784813	-0.722859	-0.047495	0.387779	-0.185197	-0.117934	0.333936	0.0401208	0.00108253	-0.161678	0.191117	0.612347	0.318506	-0.0808226	0.196101	0.0984321	-0.326413	-0.262327	0.160216	0.403773	-0.535884	-0.815255
AT5G26780	0.126721	-0.0752059	-0.328716	-0.528412	0.0683572	-0.298845	-0.889959	-0.836575	0.24141	-0.025709	-0.101397	-0.0674243	-0.00724383	-0.404986	-0.175303	0.0229514	0.181215	-0.150027	0.111793	0.0367333	-0.0641514	-0.140303	-0.671558	-1.26271
AT5G27150	-0.021024	0.0922813	0.775481	0.511357	0.141865	0.151838	0.417412	0.052066	-0.248765	0.0948355	0.227955	-0.0240024	-0.160858	-0.562307	-0.156301	-0.329555	-0.156083	0.0282634	0.523283	0.590266	-0.108363	0.00844768	0.314279	-0.142689
AT5G14880	0.00433855	-0.0360167	-0.390267	0.0105425	-0.302473	-0.959716	-1.09702	-1.05671	0.157647	0.249287	0.50872	0.0164538	-0.311668	-0.502042	0.240603	-0.381816	0.410526	0.126858	-0.0234101	0.560248	-0.0659146	-0.443161	-0.739244	-1.56804
AT5G15740	-0.0414175	-0.616499	-0.186272	-1.00696	0.326175	0.575218	-0.0517467	-0.421233	0.541543	-0.0115032	0.204035	-0.317987	-0.109734	0.0190545	0.0816607	-0.0664819	-0.108731	-0.48262	0.65474	0.90096	0.121149	0.394466	0.124679	-0.13565
AT5G16000	-0.371095	-0.176179	-1.28581	-1.18448	-0.206805	-0.267991	-0.511398	-0.874404	-0.0358563	-0.238919	0.154682	-0.129437	-0.197245	-0.326803	0.0760867	-0.0883378	0.0230847	-0.130479	-0.685162	-0.205308	0.0243599	-0.134698	-0.105051	-0.0840931
AT1G47128	-0.130321	0.0366192	0.620438	1.07983	-0.205661	0.405543	0.815076	0.872985	-0.0502795	0.2473	0.518714	0.535718	-0.467935	-0.108603	0.0382329	0.330574	0.0474842	0.226066	0.468027	0.464809	-0.0607948	0.14514	-0.166483	-0.519954
AT1G51140	-0.135038	0.629566	2.67746	3.0041	0.511725	2.09824	2.69036	3.17402	0.512531	1.03675	1.05751	0.0745604	-0.424699	0.0959934	0.268577	0.677162	0.597972	0.742351	2.88169	2.30594	0.586586	1.45091	1.59284	2.01504
AT4G16340	-0.0259884	-0.0135379	-0.403622	-1.04404	-0.00707564	-0.331225	-0.0347963	-0.480496	-0.177422	-0.313221	-0.0833072	-0.148975	0.0712294	-0.221375	-0.0477273	-0.15665	0.168888	0.0355732	-0.126077	-0.00210623	-0.112261	-0.138684	-0.443613	-0.747443
AT4G17770	0.370285	0.569787	0.570255	0.350563	0.254255	-0.346806	-0.908706	-0.957477	1.15893	0.0393596	-0.22754	-0.15923	-0.157411	-0.375739	-0.315038	0.0303339	0.789921	0.618793	1.31884	0.847875	0.0329072	-0.21091	-1.02872	-2.01331

## Sheet: Sheet5
ID	1h_Shoot_Osmotic/CK	3h_Shoot_Osmotic/CK	6h_Shoot_Osmotic/CK	1h_Root_Osmotic/CK	3h_Root_Osmotic/CK	6h_Root_Osmotic/CK	1h_Shoot_Drought/CK	3h_Shoot_Drought/CK	6h_Shoot_Drought/CK	1h_Root_Drought/CK	3h_Root_Drought/CK	6h_Root_Drought/CK	1h_Shoot_Salt/CK	3h_Shoot_Salt/CK	6h_Shoot_Salt/CK	1h_Root_Salt/CK	3h_Root_Salt/CK	6h_Root_Salt/CK
AT2G26730	-0.0357772	-0.274942	-0.867572	-0.0913674	-0.404149	-0.508446	0.286254	0.38147	-0.184658	-0.145437	-0.171765	-0.100555	0.0266449	-0.0196682	-0.0428232	-0.181534	-0.437798	-0.813977
AT2G45590	0.408958	-0.399351	-0.469181	-0.636407	-1.06262	-1.24474	0.747033	0.294657	0.106327	-0.410168	-0.0291691	-0.571582	0.580995	0.275735	0.215096	-0.603052	-1.16527	-1.00147
AT2G19170	0.204755	-1.17744	-1.53119	-0.0756701	-1.00575	-1.16115	0.0881766	0.215218	-0.19527	-0.333503	-0.146308	-0.505285	0.298271	-0.546789	-0.235732	-0.49236	-0.599805	-0.610792
AT2G33880	0.459739	-0.534614	-0.572748	-0.214631	-0.577834	0.0953231	0.0427867	-0.127521	-0.817275	-0.0697168	-0.388702	-0.08167	0.601784	0.435899	-0.558657	-0.54901	-0.0443001	0.0508461
AT2G33860	0.453458	-0.732826	-0.504011	-0.55944	-0.626497	-0.573942	0.420685	0.326872	-0.083822	-0.488584	0.15874	0.0920109	0.59576	-0.121573	-0.0358657	0.055351	-0.733024	-1.51945
AT2G34870	-0.0584167	-0.347222	-0.203284	0.0840643	-0.731459	-0.0803734	-0.430385	0.743124	0.242276	-0.483985	-1.91173	0.862141	-0.106915	0.383843	0.296982	-0.514573	-2.07647	-0.126177
AT2G26330	-0.0636592	-0.977429	-0.635546	1.09366	0.0837389	-1	-0.275937	-0.505813	0.148286	-0.0907655	-0.487728	-1.31982	0.0959018	0.338422	0.59988	-0.0814276	-0.503938	-1.24793
AT2G34710	0.128811	-0.699059	-0.330267	0.164705	-0.324694	-0.0335781	-0.12087	0.239153	0.15448	0.176548	0.0741965	0.429036	0.154603	-0.505897	-0.478108	0.197331	-0.883169	-0.994242
AT2G45960	-0.0779616	-0.13755	-0.453922	0.297116	0.401899	0.493497	0.228568	-0.0942322	0.3291	-0.203966	0.0954033	0.309438	0.178572	0.237237	0.147824	0.0958919	-0.207182	-0.554458
AT2G01570	0.136624	-0.474632	-0.342139	-0.362541	-0.433355	-0.105508	0.486014	-0.190089	0.0347156	-0.161295	0.115136	-0.0471749	-0.071961	-0.185714	-0.0313642	-0.0502659	0.148476	0.651211
AT2G27040	0.0618878	-0.708256	-1.14156	0.266072	0.13575	-0.0345301	-0.0522887	-0.310237	-0.0681143	-0.151922	-0.156264	-0.13878	0.191554	-0.195046	-0.0616848	0.231861	0.00869567	0.351171
AT2G27810	-0.197015	-0.965566	-0.864142	-0.0147379	-0.326267	-0.436686	-0.21268	0.118739	0.243672	0.209907	0.0999307	0.134452	-0.278003	-0.334836	-0.14343	0.106394	-0.48905	-0.34324
AT2G05920	-0.156211	-0.456793	-0.546027	-0.33094	-0.628153	-0.902684	-0.00918654	0.190808	-0.161508	-0.343705	0.0149422	-0.287724	-0.0440984	-0.0708369	-0.0529286	-0.367678	-1.18212	-1.88371
AT2G37300	-0.0831283	0.232601	0.443377	0.385946	0.229199	-0.407837	-0.127602	0.317421	-0.468808	-0.62652	0.113908	-0.867916	0.0785983	1.32782	1.05701	-0.129582	-0.993028	-1.70577
AT2G35620	-0.112203	-0.562845	-0.928285	-0.234389	-0.665086	-0.753614	-0.24631	0.132222	-0.292114	-0.0762568	-0.0568479	-0.482998	-0.17353	-0.103359	-0.217599	-0.363518	-0.877489	-0.444611
AT2G05790	-0.0235937	-1.60733	-2.13242	0.236403	-0.278435	-0.717745	0.167755	-0.0925208	0.0668958	0.614253	0.105576	-0.456424	0.0129082	-0.478107	-0.071402	0.232901	-0.49893	-0.44526
AT2G28410	-0.133012	-0.298942	-0.68393	-1.14068	-0.463082	-0.722498	-0.104026	0.0543798	-0.382768	-1.1651	0.169109	-0.979107	0.044425	0.41979	-0.220355	-1.08633	-1.0269	-1.43064
AT1G23080	0.162376	-1.56421	-0.898258	-0.262386	-1.07783	-1.20191	-0.334849	0.143668	0.346697	0.246938	0.223546	-0.0717401	0.694634	-0.559864	-0.249471	0.347136	-0.250398	-0.520001
AT1G09750	-0.158801	-2.32353	-2.94933	-1.0115	-1.21165	-3.2954	-0.520252	-0.4236	-0.523428	-0.945342	0.393598	-2.19049	-0.0719994	-1.38814	-1.68516	-0.830731	-2.12298	-3.39261
AT1G70370	-0.102159	-0.635016	-1.15652	0.274222	-0.250642	-0.669273	0.130447	0.389812	-0.195809	-0.376803	-0.253179	-0.803891	-0.219499	-0.201669	-0.397265	0.0842891	-0.77758	-1.1215
AT1G78680	0.285112	1.64954	1.22224	0.963241	1.45442	1.1427	0.971953	1.48574	0.773379	0.102953	0.303961	0.0597289	0.476814	1.89656	1.27305	0.722808	0.745655	0.426111
AT1G02205.1	0.8557	1.50377	2.41524	-0.251539	4.20671	4.00248	1.0047	0.477604	-0.178108	0.38405	0.569856	-0.664622	0.747307	1.62352	2.78552	1.18903	0.459432	-0.204618
AT1G02205.2	0.571985	1.39819	2.2344	1.06283	3.7959	5.1709	0.512381	0.319517	0.0067809	-0.0832903	-0.978528	-0.404484	0.154586	1.4903	2.59623	0.686842	2.14173	3.44637
AT2G42840	0.0326044	-1.03598	-1.75359	0.405864	-0.018038	-0.0464097	-0.143606	0.0924675	-0.345022	0.843742	-0.00544112	-0.536631	-0.156857	-0.0195374	-0.158808	0.423333	-0.831356	-1.75365
AT2G35860	-0.391498	-0.754275	-1.38608	-0.353865	-0.223031	-1.26935	-0.227288	0.676586	-0.498971	0.310638	0.687651	-0.19518	-0.381004	0.0156549	0.195573	0.234035	-0.178267	-1.54865
AT2G04850	0.109438	0.75417	1.36999	-0.445074	-0.0600681	-0.847269	0.0887437	0.897093	0.398434	-0.852111	-0.035655	-0.172886	0.302614	1.32847	1.26678	-0.690658	-1.08798	-1.20086
AT2G01820	-0.144311	-0.450738	0.0886524	-0.0849712	-0.23239	-0.251303	-0.171202	0.0784387	0.0922137	-0.116068	-0.200673	-0.0496051	0.0724594	-0.184792	0.16938	0.146557	-0.00680049	0.267173
AT2G04160	0.144664	0.450642	0.607054	-0.0685731	-0.247217	-1.32014	0.400335	0.561512	0.430548	0.0225533	0.197326	-0.311732	0.152927	0.43372	0.608873	-0.149541	-0.0546131	-0.454705
AT2G04280	-0.543275	-1.03438	-1.13358	-0.535694	-0.775566	-1.06556	-0.51439	-0.265094	-0.214843	-0.440162	-0.314001	-0.389413	-0.417065	0.0778416	0.349341	-0.516656	-1.1365	-1.59246
AT2G47160	-1.28453	-1.40948	-1.95824	-0.466612	-0.563893	-1.43615	-0.348438	0.577645	0.0997262	-0.923225	-0.0193899	-0.361052	-0.599552	-0.820011	-0.429398	-0.783968	-0.823955	-1.10397
AT1G24020	-0.48821	-1.27736	-1.60896	0.0828264	-1.39315	-1.3007	-0.47582	0.116955	0.0478845	0.850597	-0.536019	-0.538317	-0.336556	0.239957	0.622411	0.309887	-3.15134	-1.65349
AT1G75500	-0.344028	-1.20601	-1.10251	-0.399466	-1.10557	-1.50335	-0.317739	0.271016	0.225943	-0.608214	0.168213	-0.0911104	-0.100203	-1.20781	-0.231833	-0.326711	-1.31443	-1.64582
AT1G14920	-0.276671	-1.00325	-0.847367	0.0294306	0.06819	0.0543663	-0.52324	-0.364222	-0.199709	0.35077	0.172189	-0.183347	0.163701	-0.151606	-0.295227	0.300892	0.314892	-0.0937411
AT1G20950	0.023962	-0.591506	-1.26735	-0.113302	-0.476755	-1.0549	-0.0786462	-0.527004	-0.377982	-0.417312	-0.28918	-0.274298	-0.0999495	-0.592792	-0.136136	-0.202385	-0.795847	-0.858688
AT1G72970	-0.620556	-1.28473	-2.25791	0.648724	-0.0835033	-0.0322273	-0.379359	-0.289478	-0.380802	1.01783	-0.0312989	-0.0782164	-0.522337	-0.264104	-0.120544	0.566021	-0.247999	-0.359834
AT1G72810	0.18259	-0.284634	0.045247	-0.136805	-0.588225	-0.361828	0.110314	0.38616	0.449029	-0.133443	0.160183	0.206694	0.259832	0.0420566	0.159131	0.0764129	-0.701202	-1.31215
AT1G68560	0.126149	-1.41201	-1.39442	-0.327092	-0.244628	-1.41862	-0.0968872	0.351364	0.0407662	-0.575428	0.16182	-0.139932	0.150299	-1.06965	-0.979517	-0.266157	-0.163419	-1.14737
AT1G74720	-0.180022	-0.325459	-0.332715	0.0226675	-0.54641	-0.313339	-0.197095	-0.000965585	-0.0165816	-0.0245194	-0.105044	0.0462488	-0.152431	0.00939918	0.0181784	0.288119	-0.613402	-1.28521
AT1G78060	0.169346	-0.304122	-0.3185	-0.146764	-0.123922	-0.158888	0.213485	0.251797	0.209935	0.0244723	-0.10067	0.749882	0.134681	0.380739	0.629632	0.0154044	-0.678011	-0.202367
AT1G80080	-0.369765	-0.520484	-0.755559	-1.35107	0.807355	0.444816	-0.319595	0.0653661	-0.375207	-0.263958	0.554589	-0.172975	0.0155684	-0.0306138	-0.335814	-1.90833	-0.287282	-0.613425
AT1G65900	0.657475	-0.645788	-0.217156	-0.413628	-0.193788	-0.876208	0.471832	-0.350609	-0.304921	-0.756756	0.0796538	-1.0055	0.302542	0.543591	0.0463006	-0.418744	-0.496663	-0.987431
AT1G10640	-0.144099	-0.761775	-1.34042	-0.181475	-0.254031	-0.87409	0.534557	-0.722803	-1.07293	-0.325315	-0.0641519	-0.680715	0.0897676	1.04283	-0.11947	0.608765	-0.378274	-0.791396
AT1G08190	-0.256879	0.310901	0.681157	0.420957	0.629745	0.487921	0.196838	0.155967	0.289816	0.0148187	0.0783592	0.0509412	-0.0345934	0.567648	0.928888	0.409335	0.306198	-0.00363723
AT1G01900	-0.00728268	0.441502	0.660997	0.427206	1.14688	1.68447	-0.270742	1.03405	0.409895	0.297124	0.69883	-0.443661	-0.39897	0.605659	0.678893	-0.136893	-0.120438	-0.158164
AT1G71770	-0.231455	-1.05673	-0.0880698	0.354738	0.0665181	1.0215	-0.278412	-0.322469	-0.0842908	-0.192995	-0.400155	-0.0110879	0.0107264	0.0275507	-0.322495	-0.0456719	-0.433136	0.819683
AT1G14440	-0.342325	-1.04447	-1.23345	0.42346	1.19652	0.149329	-0.0426515	-0.348144	-0.423334	-0.431785	-2.76876	0.00592483	-0.00717136	-0.320232	-0.220348	0.0348354	0.616071	0.271175
AT1G28440	-0.0612841	-0.488832	-0.698673	-0.0961613	-0.446158	-0.445566	-0.294267	-0.0256522	-0.0457733	-0.48661	-0.0535089	0.0127166	0.082774	-0.0847407	-0.0149386	0.240107	-0.498424	-0.872207
AT1G79620	0.0292998	-0.359004	0.415898	-1.00116	0.635011	-0.158946	0.330672	0.94898	0.823939	-0.360671	0.130343	-0.307366	0.202523	0.351552	0.919543	-0.526578	-0.261725	-1.08317
AT1G41830	-0.0759877	-0.15446	-0.194025	-0.355204	-0.398777	-1.12957	0.359724	0.406413	-0.0723824	-0.0855518	0.10682	-0.63832	-0.197718	0.507205	1.02739	-0.386362	-0.701457	-1.05669
AT1G01300	-0.400025	-0.625378	-1.19728	-0.538503	-0.800548	-0.876943	-0.674422	-0.376573	-0.694149	-0.269398	-0.35589	-0.333497	-0.396482	-0.795521	-0.541698	-0.384478	-1.32413	-2.07583
AT1G26570	-0.308222	-0.714309	-1.38141	-0.106288	-0.43923	-0.331982	-0.136621	-0.53995	-0.644055	-0.180764	-0.28156	-0.551907	-0.444538	-0.231573	-0.28536	-0.486531	-0.440591	-0.215729
AT1G15000	0.404054	-0.63771	-0.951774	0.0852289	-0.154954	-0.403268	0.311085	0.162786	-0.484238	-0.0233006	0.379383	0.222515	0.353297	-0.381167	-0.667294	-0.0217238	-0.90441	-1.18653
AT1G53300	-0.0182526	-0.334536	-0.865666	0.377893	-0.341082	-0.860758	0.46529	0.182024	-0.150578	0.673115	0.252188	-0.34795	-0.336041	-0.052721	0.0428045	0.233916	0.539102	0.771288
AT1G53240	0.11565	-0.457451	-1.33266	-0.10455	-0.308924	-0.828438	0.237725	-0.130104	-0.369699	-0.187136	-0.00350399	-0.276363	-0.0288707	-0.625748	-0.598351	-0.334973	-0.951704	-1.40379
AT2G47240	-0.509338	1.03305	0.312112	0.242405	0.62961	0.0606908	-0.729374	-0.734888	-0.689586	0.215966	0.122619	0.135149	-0.449067	-0.500214	-0.48991	0.0941109	-0.18907	-0.22512
AT1G51460	0.0270879	-0.418941	-1.11916	1.05827	0.231757	0.283345	-0.0966655	-0.551352	-0.331833	0.975063	0.0740977	0.209361	0.227072	0.0458854	0.0605202	1.04225	0.397449	0.875263
AT1G51570	-0.0512225	-0.754791	-0.993892	0.116403	-0.139636	-0.260189	-0.103694	-0.281027	-0.264885	-0.0460438	0.098441	-0.0839099	0.107637	-0.448308	-0.366376	0.0681462	-0.358855	-0.912345
AT1G69690	-0.515043	-1.11777	-1.47519	-0.287729	-0.21513	0.0975538	-0.344564	0.355104	-0.117702	-0.59719	-0.0198512	-0.0622619	-0.0185652	-0.0713955	0.0741272	-0.544182	-0.219625	-0.561353
AT1G69295	0.0565406	0.904977	1.21623	0.887935	1.3153	1.47694	0.105811	0.23475	-0.0826611	0.349225	0.167061	0.547341	-0.113803	1.19795	0.783333	0.604093	0.851578	0.90924
AT1G80310	-0.0679041	0.866687	1.21186	-0.919373	-0.556963	-0.00883118	0.375911	0.523082	0.486216	-0.583977	-0.0200149	-0.0168701	0.488371	0.665742	0.430091	-0.343759	-0.550417	-0.781083
AT1G68400	-0.0558881	-0.794936	-1.31486	0.0341416	-0.846487	-0.701639	-0.0113062	0.16586	0.0501761	0.141258	0.0841497	0.142753	0.144697	-0.197138	-0.373484	-0.00526928	-0.280776	-0.0949418
AT1G72290	-0.291049	-0.374603	-0.835189	-0.015348	-0.0855757	-0.257011	-0.156119	-0.433798	-0.430435	-0.343074	-0.185111	-1.00605	-0.656046	-0.122484	0.148323	-0.249359	1.21373	0.104758
AT1G64390	0.815637	0.427507	-1.09906	0.34345	-0.881636	-1.2535	0.92346	-0.120658	-1.13287	-0.670519	-1.05166	-0.253656	0.724618	1.60987	0.825212	0.767224	0.162655	0.017308
AT1G55260	-0.194628	-0.444964	-1.12045	0.464189	-0.296444	0.938065	-0.142634	0.495369	-0.514232	0.460731	-0.188745	0.282505	-0.0151599	0.322571	-0.170451	0.439592	-0.713743	-0.739949
AT3G07540	0.0563079	-1.35045	-1.65737	-0.131479	-0.703517	-0.278311	0.467494	-0.122074	0.416067	0.392614	-0.11571	0.614323	0.163607	-0.9966	0.117038	0.542009	-0.868237	-1.36549
AT3G10080	-0.202239	-0.681206	-0.57586	-0.465255	-0.171325	-0.708091	-0.474721	0.0934698	0.0375728	-0.759206	-0.123075	-0.0800943	-0.00849241	-0.171388	-0.0280337	-0.572376	-1.62283	-1.30149
AT3G05600	-0.236227	-1.2533	-1.64084	-0.602512	0.0740006	0.447377	-0.240046	-0.913136	-0.236269	-0.577798	0.323096	0.350977	-0.322016	0.200322	0.645995	-0.433627	0.227557	0.722466
AT3G02110	-0.288058	-0.957904	-1.46455	0.290726	-0.0446949	0.346459	-0.400211	-0.262145	0.0175417	0.346368	0.0777318	0.12599	-0.112243	-0.375976	-0.474374	0.412681	-0.022958	-0.137802
AT3G08680	-0.349222	-0.795288	-1.48107	-0.254036	-0.733678	-0.847345	-0.188159	0.0468948	-0.196899	-0.126632	0.090086	-0.265856	-0.186315	-0.21793	-0.0588956	-0.289163	-0.602801	-0.528472
AT3G08770	0.261438	-0.464922	-0.894263	0.681916	-0.394703	-0.300354	0.255073	-0.435014	-0.581952	0.687093	-0.24089	-0.192332	0.165508	0.0860846	0.571142	0.528468	-1.08097	-2.74837
AT3G04290	-0.334167	-1.67221	-2.2452	2.13124	-0.0742424	0.994918	-0.645775	-0.270652	-0.420679	2.33696	-1.14487	-0.174498	-0.328475	-0.632973	-0.228864	1.09954	-0.755462	1.53542
AT3G14240	-0.286349	-1.28679	-1.64802	-0.116196	-0.40947	-0.372484	-0.274013	0.397356	0.107455	0.319052	0.438554	0.303558	-0.0405787	-0.9984	-0.791584	0.343196	-0.611811	-1.29345
AT3G16060	-0.173451	-0.192033	-0.201111	0.162414	0.0155985	-0.430778	-0.0547421	-0.0153325	-0.0470535	-0.115603	-0.159096	-0.260021	-0.040131	0.339965	0.476644	0.0217429	-0.49027	-1.19826
AT3G17840	0.366025	-0.85919	-1.30377	0.204771	-0.598687	-0.576593	0.29544	0.227013	-0.216908	0.324765	0.117016	0.162195	0.0711407	-0.216142	-0.0872125	0.266498	-0.310726	-0.232862
AT3G21190	-0.33629	-0.81864	-0.650428	-0.600149	-0.520669	-0.950127	-0.149181	0.00201109	-0.205013	-0.803583	-0.295501	-0.471556	-0.149591	-0.0929082	0.790972	-0.507407	-0.6237	-1.4876
AT3G21750	0.548928	1.29731	1.25109	1.10148	1.52619	1.64226	0.570612	1.1005	0.353624	0.35078	0.712037	0.494574	0.522799	0.714165	0.348837	0.823953	0.493613	0.431105
AT3G19820	-0.229798	-0.770614	-1.77079	-0.0792359	-0.220507	-0.87756	0.0204526	0.308903	0.199687	-0.245255	0.0665383	0.0101128	-0.0329941	-0.496059	-0.473867	0.074654	-0.831883	-1.79817
AT3G27020	0.043215	0.519237	0.970869	0.401272	0.437412	0.386567	0.0416234	0.211066	0.442351	-0.170978	-0.086102	-0.0750965	0.236593	0.392747	0.201336	0.332569	-0.479783	-1.11596
AT3G18490	0.317306	0.482132	0.92533	0.585881	0.394913	1.02423	0.726544	1.01131	0.600202	0.731961	0.485066	0.666768	0.585007	0.69618	0.821147	0.677224	-0.436071	-0.384728
AT3G26140	-0.141014	-0.764149	-0.790365	0.237266	0.183722	-0.452752	-0.782837	-0.437521	-0.581431	-0.801294	0.266727	-0.65501	-0.0491769	0.229785	-0.299871	-0.700673	-0.102443	-0.0398608
AT1G55360	-0.308448	-0.797458	-0.734787	-0.376588	-0.878787	-1.01947	-0.322582	-0.0855417	-0.179696	-0.178898	-0.060393	-0.129152	0.0864096	-0.253881	-0.39632	-0.139083	-0.892019	-1.2976
AT3G15095	-0.235051	-0.944955	-0.311172	0.236676	-0.119078	-0.142321	-0.277232	-0.236438	0.206611	0.0285006	0.0622708	-0.0431226	0.133889	-0.212561	-0.136068	0.0966519	0.243039	-0.135767
AT3G14067	0.452831	1.83078	2.69455	0.306588	1.07663	1.16777	1.19244	1.17937	0.58862	0.129369	0.304192	0.156776	0.703712	1.90289	1.22713	0.541823	0.0312813	-0.814959
AT3G13510	-0.223967	-0.426719	-1.12131	-0.277651	-0.505876	-0.367885	-0.190096	0.0722906	0.0137118	-0.15061	-0.0929377	0.15799	-0.032459	-0.188875	-0.565057	-0.0604496	-0.691132	-0.59021
AT3G18850	0.211327	-0.882551	-0.583737	0.498568	-0.151023	0.14975	0.0248747	-0.36473	-0.401631	-0.220469	-0.232693	-0.161767	0.559689	0.156965	0.390956	0.0423415	-0.337267	0.345209
AT3G20015	0.369811	-0.541769	-0.965699	-1.2751	-0.938146	-0.255163	0.099153	-0.240305	0.00251468	-0.696073	0.312076	0.156703	-0.0520798	-0.121495	-0.249278	-1.25699	-3.09414	-3.26098
AT1G30330	-0.47057	-0.149042	-0.390268	-0.454461	-0.678267	-0.649864	-0.532376	0.172561	-0.202019	-0.515262	-0.0635681	-0.138442	-0.321668	-0.25246	-0.276464	-0.582163	-0.927457	-1.4099
AT1G07080	-0.272479	0.426292	0.972446	-0.0741749	0.214181	0.414631	-0.00781645	0.231684	0.28107	-0.139066	0.277926	-0.0799271	0.0204329	0.468357	0.524315	-0.293102	-0.205859	-0.379026
AT1G58360	0.374163	0.636272	2.15687	1.54618	1.29584	2.18744	0.494037	1.16387	0.907897	0.912046	0.0909328	0.842961	0.121585	0.575368	2.12851	1.4771	1.90356	2.12499
AT1G67040	-0.0195983	-0.747447	-2.02637	0.152462	-0.699444	0.438897	-0.0753477	-0.231747	-0.55134	0.141397	-0.685572	0.410104	0.130966	0.00198787	-0.461743	0.587003	-0.646656	-1.71491
AT1G19920	-0.0576777	-0.676904	-1.01622	-0.440665	-0.751408	-0.67223	-0.0217203	-0.0595264	-0.191586	-0.442798	-0.0522669	-0.0796571	-0.0372293	-0.384081	-0.0664022	-0.50992	-0.650466	-0.690209
AT4G00430	-0.272152	0.275712	0.318847	1.00335	0.465136	1.24788	0.116061	0.0075157	-0.0588366	0.225165	-0.108051	-0.138677	0.0305091	0.432953	0.456164	0.453432	0.0720659	0.160233
AT4G00740	-0.0200705	-0.141993	-0.42414	-0.111585	-0.437882	-0.888347	-0.036146	0.140657	0.234586	-0.270097	0.0930416	-0.159136	0.0131956	-0.219389	-0.0105122	-0.138865	-1.23643	-2.18592
AT4G02680	-0.399745	-0.583782	-0.321941	-0.552668	-0.840766	-0.832307	-0.36831	-0.178959	-0.0119461	-0.162729	-0.294219	-0.0268325	-0.196267	-0.265635	-0.106784	-0.301213	-1.28947	-1.80381
AT4G04890	-0.103476	-0.157134	-0.731626	0.105757	-0.374423	-0.103134	0.0851337	-0.149665	-0.117655	0.442083	0.283509	-0.468644	0.445969	0.0438684	0.0555045	-0.00688554	-0.440048	0.0128853
AT4G22130	-0.150167	-0.418038	-0.843064	-0.128672	-0.681204	-0.87743	0.145061	0.303932	-0.0122107	-0.122569	-0.237472	-0.276176	-0.18129	-0.207158	0.187848	-0.0721332	-0.0672087	0.39303
AT4G23490	0.250598	-0.11935	-0.361868	-0.210838	-0.0769337	-0.423189	0.45726	-0.319215	0.167163	-0.266853	0.0217853	-0.52478	0.0599342	0.436794	0.684429	-0.279584	-1.01889	-1.49228
AT4G29030	0.0346385	-0.63534	-1.44125	0.677942	-0.394704	0.0547978	0.0362074	-0.368348	-0.745542	0.670799	0.526679	0.528001	-0.142072	0.0312915	-0.0190935	0.715035	-0.373605	-0.953498
AT4G29130	-0.00108241	0.734686	0.785999	0.0347736	0.0273399	-0.457191	0.342035	0.778143	0.269696	-0.0955329	0.00589081	0.0706947	0.0345008	0.445776	0.570731	-0.0649111	-0.113105	-0.500622
AT4G29680	0.0529302	-0.183194	0.133673	-0.30653	-0.39869	-0.661256	-0.18305	-0.0151401	0.0558798	-0.320751	-0.211257	-0.266554	0.156383	0.0449514	0.0746093	-0.138317	-0.84807	-1.51032
AT4G29720	-0.240918	-0.366363	-0.629417	-0.541356	-1.04938	-0.797329	0.15571	0.191297	-0.305432	-0.524075	-0.301997	0.184038	0.0135379	-0.107969	-0.254932	-0.279229	-0.433347	-0.656493
AT4G34980	-0.0668059	-0.445042	0.16156	-0.570788	-0.489063	-0.907718	-0.0373379	0.278878	0.13467	-0.0127815	0.138525	0.0708751	0.283814	0.107016	0.319742	-0.531929	-1.32163	-2.10663
AT4G36360	0.182961	0.212013	-0.362625	0.22121	0.637639	0.368882	0.366807	0.661468	-0.335395	0.0203468	-0.231491	-0.139948	0.263771	0.460563	0.533257	0.278263	-0.105018	-0.811582
AT4G36250	-0.240095	-0.130693	-0.331101	0.357725	0.0659021	0.397006	-0.240666	-0.019596	-0.328349	0.289192	-0.120792	-0.181775	-0.00908773	0.12981	0.104749	0.248656	-0.304296	-0.178223
AT4G38220	0.263099	0.0994084	0.129423	-0.132685	-0.113783	-0.262536	0.116495	0.45864	0.0853732	-0.182042	-0.0792894	0.0047845	0.304244	0.0634489	0.292858	-0.121382	-0.594525	-1.31204
AT4G38250	-0.0187172	-0.0666865	0.308336	0.122559	0.208846	0.0732244	0.262879	0.366842	0.470143	0.129094	-0.0579974	-0.220221	0.212435	0.154941	0.473244	0.423029	0.0948247	-0.0390415
AT4G38660	-0.125356	-1.57812	-2.49311	-0.298273	-0.862899	-1.37198	0.129265	0.264882	-0.22005	-0.00911445	0.225909	0.131606	0.0252184	-1.01048	-0.615973	-0.177728	-0.698734	-1.32247
AT4G39330	0.0628651	1.14121	0.679979	0.911434	1.18592	1.11176	0.565151	-0.026445	-0.548714	1.16181	0.0847322	-0.387383	0.288793	1.28098	1.12537	0.89496	-0.121037	-0.212847
AT3G49670	-0.467784	-1.16808	-2.23328	-0.1164	-0.909639	-0.661714	-0.845275	-0.0116965	-0.315319	-0.519705	-0.145811	-0.144317	-0.0746697	-0.681227	-0.887848	-0.0798451	-0.728433	-0.857423
AT3G51950	-0.0593952	-0.527037	-0.512979	-0.615918	-0.673723	-0.861409	0.0570946	0.0818417	0.0436381	-0.531853	-0.191465	-0.151465	0.126504	0.0916849	-0.233737	-0.300602	-0.835229	-0.626067
AT3G56370	-0.150287	-0.768646	-1.62823	0.391973	-0.205803	-0.605008	0.282522	0.275999	-0.252348	0.248808	0.113254	-0.108093	-0.112305	0.224876	0.00731814	0.501304	-0.386011	-0.503286
AT3G59420	-0.312238	-0.430571	-0.323089	0.752843	-0.0243525	-1.05845	0.0860833	0.63928	-0.0579997	0.0624887	0.206203	-0.409321	-0.498377	0.589699	0.259937	0.371573	-0.233373	-1.13277
AT3G59140	-0.256586	0.560951	-0.172963	0.666225	1.62537	0.350219	-0.164875	-0.325779	-0.260792	-0.0446969	0.782283	-0.0449686	0.160098	0.0302555	0.164748	0.0387801	1.25635	0.7194
AT3G61820	-0.0818292	-0.429269	-0.778157	-0.0340774	-1.3228	-0.520167	-0.0925087	0.722485	-0.0597902	0.0552709	-0.0010071	0.323948	-0.0285483	0.00849444	-0.088896	0.197686	-1.26216	-0.978412
AT5G01090	-0.146822	-0.783291	-0.674363	-0.00200429	-0.424815	-0.159367	0.0684254	-0.122598	0.069537	0.0558363	0.131735	0.24698	0.140632	-0.212266	0.0291777	0.0405745	-0.396724	-0.3338
AT5G01020	-0.168794	-0.332482	-0.455372	0.0624104	-0.0963907	-0.48891	-0.0784775	0.10033	0.290085	0.168979	0.287173	-0.0293366	0.214192	0.119432	-0.0980677	0.217697	-0.373551	-0.965441
AT5G01890	0.0616877	-0.481137	-1.16817	0.201929	-0.023459	-0.335096	0.254105	0.766456	0.00565435	0.516782	0.57489	0.166753	0.0993362	0.380415	-0.0162482	0.37385	-0.318541	-1.0953
AT5G03170	-0.0728913	-0.199852	0.0838118	-0.167135	0.0130658	-0.429419	-0.232588	0.0570406	-0.135724	-0.69883	-0.0399227	-0.879769	0.1126	0.387091	0.442842	-0.489089	-0.702979	-0.557796
AT5G07030	0.302449	-0.251723	-0.988724	-0.122124	0.1177	-0.786334	0.450563	0.931087	-0.0194219	0.15967	0.737112	-0.331985	0.204853	-0.00625084	-0.0136362	-0.142138	-0.795137	-1.53968
AT5G07180	0.236573	-0.51856	-0.739109	0.145851	0.860764	0.495527	0.682759	1.02185	0.605874	1.14585	-0.608232	0.0692627	0.253717	0.348857	0.657034	-0.554589	-0.210897	0.902153
AT5G07800	0.0380084	-0.191202	-0.171043	-0.409888	0.402982	0.204325	-0.180031	0.23659	-0.156253	-0.631247	-0.249139	-0.0940199	0.0169706	0.407202	0.442603	-0.223123	-0.00161511	-0.640818
AT5G08000	0.075443	-0.627243	-0.817629	0.487806	-0.392583	0.70017	-0.0531982	-0.328394	-0.498029	0.882239	-0.116892	-0.108401	0.0286418	-0.0831056	-0.299481	0.805858	-0.384464	0.639215
AT5G09760	0.144567	-0.114503	-0.815607	0.154475	-0.457651	-1.01698	0.496405	-0.0819903	-0.265376	0.303622	0.0311536	-0.682376	0.0707353	-0.00507099	-0.335157	-0.4089	-0.733885	-0.942983
AT5G10930	0.790085	2.48398	2.93179	2.10756	1.74954	1.24509	1.09569	0.315638	0.0361433	-0.055744	0.0219379	0.252378	0.449388	2.60217	2.3306	1.39964	1.14789	0.531282
AT5G13640	-0.126115	-0.0163785	0.649238	-0.000169506	-0.112952	-0.0342052	0.0454068	0.275422	0.426305	-0.138413	-0.0890039	0.189168	0.0499262	0.368878	0.407997	-0.0625236	-0.45165	-0.706504
AT5G22860	-0.345159	0.800759	1.96232	0.358643	2.01202	2.11499	-0.238471	0.734306	0.450806	-0.15521	1.09116	1.35192	-0.0746192	0.590879	1.53618	0.851142	1.37034	1.85752
AT5G23940	0.407058	-0.741593	-1.12199	0.580811	0.128495	0.105504	0.318913	-0.0583326	-0.44598	0.383075	-0.25091	-0.431493	0.402666	0.237324	0.54673	0.406722	0.143131	0.472147
AT5G40150	-0.217306	-1.17914	-2.21967	0.217868	-0.595677	-0.979072	0.228249	-0.11633	-0.625306	-0.276312	-0.166781	-0.412205	-0.266296	-0.282256	-0.273517	-0.111978	-0.234596	-0.253671
AT5G41870	0.36264	0.0573802	0.51816	-2.1469	-1.27069	0.22609	0.34377	0.47435	0.105056	-0.205162	-0.0663874	1.2306	0.109742	0.442287	-0.14426	-0.768977	-1.37022	-1.66793
AT5G43020	0.278546	-0.927466	-0.845988	0.286108	-0.988104	-1.39571	-0.0140262	0.109911	-0.242285	-0.15295	-0.0829274	-0.698437	0.0688129	-0.147566	0.0771738	0.0935393	-0.591201	-0.233994
AT5G45670	-0.399361	-2.08749	-3.66812	0.337512	-1.32306	-1.55829	-0.0975737	-0.735828	-0.298146	1.16375	-0.762308	-0.232603	-0.291704	-0.532997	-0.770212	0.719982	-1.04046	-0.561536
AT5G47640	1.83389	2.6418	1.9027	2.90013	1.83887	1.31521	2.63395	-0.0243182	0.11176	0.48118	-0.0688664	-0.122632	1.50618	2.85141	1.43852	2.32826	2.65667	2.65391
AT5G47780	-0.64477	-1.04888	-0.676004	-0.449821	-0.565389	-0.527206	-0.822543	0.00820174	0.187798	-0.13667	0.157738	-0.0171626	-0.483219	-0.695131	-0.475205	-0.33097	-0.803296	-1.54999
AT5G48360	0.0548713	-1.32299	-1.4016	0.134653	-0.422437	-1.18111	-0.108885	-0.368245	-0.310965	0.223844	0.0149868	-0.37149	0.0701862	-0.148126	0.310962	0.00219867	-0.935057	-1.10857
AT5G49180	0.331095	-0.485292	0.557243	-0.984117	-0.261585	0.668309	0.286269	-0.764658	-0.282831	0.390542	-0.334671	-0.776723	0.0752146	0.503809	0.635721	0.43552	-0.471718	0.425174
AT5G51750	-0.156788	-0.907411	-1.20778	0.704731	-0.0430066	0.12049	-0.313531	-0.716744	-0.602999	0.738375	-0.178962	-0.538836	-0.0349819	0.124817	0.239337	0.553513	-1.51991	-2.28939
AT5G51560	-0.0392458	-0.757571	-1.78855	0.298639	-0.158287	-0.60677	-0.039789	0.0314265	-0.612893	0.0486845	-0.0878538	-0.169595	0.138668	-0.218147	-0.206543	0.292487	-0.398521	-0.283213
AT5G51550	-1.04605	-2.04594	-2.27757	-0.391046	-1.07245	-1.29355	-0.921424	-0.025902	0.160852	-0.326927	-0.415336	-0.209925	-1.11103	-1.26577	-0.845634	-0.340436	-1.50368	-2.46875
AT5G53140	-0.262541	-0.141752	-0.545033	-0.49737	-0.338778	-0.549726	-0.292312	-0.0109342	-0.530198	-0.594076	0.233986	-0.300592	0.0338134	0.135522	0.268576	-0.553633	-0.294631	-0.568867
AT5G55230	-0.12504	-0.974391	-1.25998	-0.0436383	-0.200223	-0.455291	-0.240926	-0.0390836	-0.286285	0.0568244	0.127554	-0.115935	-0.0652068	-0.309981	-0.173669	-0.103773	-0.470173	-0.546393
AT5G55480	-0.26777	-1.17955	-2.60272	0.112447	-0.213486	-0.713134	0.0914669	0.44912	-0.48298	0.0373288	0.10179	-0.389167	-0.0665485	-0.677923	-0.196102	-0.0598363	-0.438488	-0.710109
AT5G59810	-0.0326294	-0.127562	0.0111837	0.248456	-0.0395043	0.302299	0.19475	-0.392887	-0.619618	0.0860839	-0.120972	0.0629431	0.488725	0.286605	-0.107577	-0.190256	0.171271	0.67319
AT5G60210	0.133353	-0.851435	-0.7982	0.509924	0.0739861	0.267851	0.0182949	-0.331808	-0.247391	0.596608	0.163162	0.153173	0.251417	-0.0898324	-0.24285	0.475194	0.0707992	-0.0135874
AT5G60490	-0.744316	-0.822716	-0.858945	-0.826643	-0.244944	-0.746909	-0.642432	0.0558634	-0.311929	-0.792761	-0.0337667	-0.738351	-0.459482	-0.178792	-0.129383	-0.924465	-1.07792	-1.1822
AT5G60690	-0.168499	-0.560974	-0.879953	-0.274728	-0.733383	-0.590485	-0.206173	0.192129	-0.197006	-0.431834	-0.0309669	0.20455	0.0731547	-0.498249	-0.191194	0.117172	-0.371076	-0.239438
AT5G62890	0.0798429	-0.413575	-0.977416	0.0535357	0.142401	-0.0426563	0.196109	0.137129	-0.0762869	0.270005	0.119052	-0.0904531	0.199558	-2.70972e-05	-0.339614	0.03996	-0.551303	-0.852766
AT5G63940	-0.131953	-0.0571562	-0.00324444	0.207686	0.208002	-0.426114	0.159698	0.23381	-0.00541147	0.0509078	0.225056	-0.308395	0.237557	0.125856	0.110775	0.285154	0.0675959	-0.276782
AT5G65700	0.0252183	-0.812286	-1.10344	0.167809	-0.18453	-0.345893	0.0883869	0.289251	0.0773527	0.130527	0.141534	-0.0650331	0.299017	-0.555875	-0.638167	0.182812	-0.401611	-0.328579
AT5G65990	0.115401	1.21987	1.10782	2.66345	3.04224	3.0818	0.0339961	0.130208	-0.109366	1.09186	0.62257	0.663373	-0.107503	1.3837	1.03633	2.59268	3.82821	3.76672
AT5G66560	-0.163814	-0.799144	-1.01609	0.145682	-0.080428	-0.469542	0.109612	0.237483	-0.0101887	0.111019	0.212682	-0.434358	0.251366	-0.275597	0.271781	0.175499	-0.16763	-1.0095
AT5G67230	0.167083	0.796418	-0.0118948	1.2815	0.664902	0.796582	0.0065379	0.526675	0.285899	0.184129	0.0238205	-1.18938	-0.00656767	0.968061	0.703783	1.21467	2.33278	2.11882
AT5G67360	0.0254026	0.486892	0.586332	-0.0199636	0.0412397	0.733123	0.228844	0.872408	0.198169	0.513471	0.253791	0.518856	0.0178424	0.422715	0.455441	0.25163	-0.913888	-1.30786
AT5G67280	-0.0261799	-0.668912	-0.858325	0.306667	-0.452797	-0.344001	-0.45452	0.142536	-0.37492	0.297763	0.280804	0.330277	0.205326	-0.0125818	-0.0640822	0.56054	0.202235	0.430552
AT5G26230	0.0713936	-0.0948952	-0.50977	0.507912	0.0302427	-0.0743133	0.130406	-0.180984	0.169117	0.334577	-0.135338	-0.0827579	0.273889	0.175998	-0.281253	0.146687	-0.450734	-0.205695
AT5G26850	-0.0644466	-0.784813	-0.722859	0.387779	-0.185197	-0.117934	0.0401208	0.00108253	-0.161678	0.612347	0.318506	-0.0808226	0.0984321	-0.326413	-0.262327	0.403773	-0.535884	-0.815255
AT5G26780	-0.0752059	-0.328716	-0.528412	-0.298845	-0.889959	-0.836575	-0.025709	-0.101397	-0.0674243	-0.404986	-0.175303	0.0229514	-0.150027	0.111793	0.0367333	-0.140303	-0.671558	-1.26271
AT5G27150	0.0922813	0.775481	0.511357	0.151838	0.417412	0.052066	0.0948355	0.227955	-0.0240024	-0.562307	-0.156301	-0.329555	0.0282634	0.523283	0.590266	0.00844768	0.314279	-0.142689
AT5G14880	-0.0360167	-0.390267	0.0105425	-0.959716	-1.09702	-1.05671	0.249287	0.50872	0.0164538	-0.502042	0.240603	-0.381816	0.126858	-0.0234101	0.560248	-0.443161	-0.739244	-1.56804
AT5G15740	-0.616499	-0.186272	-1.00696	0.575218	-0.0517467	-0.421233	-0.0115032	0.204035	-0.317987	0.0190545	0.0816607	-0.0664819	-0.48262	0.65474	0.90096	0.394466	0.124679	-0.13565
AT5G16000	-0.176179	-1.28581	-1.18448	-0.267991	-0.511398	-0.874404	-0.238919	0.154682	-0.129437	-0.326803	0.0760867	-0.0883378	-0.130479	-0.685162	-0.205308	-0.134698	-0.105051	-0.0840931
AT1G47128	0.0366192	0.620438	1.07983	0.405543	0.815076	0.872985	0.2473	0.518714	0.535718	-0.108603	0.0382329	0.330574	0.226066	0.468027	0.464809	0.14514	-0.166483	-0.519954
AT1G51140	0.629566	2.67746	3.0041	2.09824	2.69036	3.17402	1.03675	1.05751	0.0745604	0.0959934	0.268577	0.677162	0.742351	2.88169	2.30594	1.45091	1.59284	2.01504
AT4G16340	-0.0135379	-0.403622	-1.04404	-0.331225	-0.0347963	-0.480496	-0.313221	-0.0833072	-0.148975	-0.221375	-0.0477273	-0.15665	0.0355732	-0.126077	-0.00210623	-0.138684	-0.443613	-0.747443
AT4G17770	0.569787	0.570255	0.350563	-0.346806	-0.908706	-0.957477	0.0393596	-0.22754	-0.15923	-0.375739	-0.315038	0.0303339	0.618793	1.31884	0.847875	-0.21091	-1.02872	-2.01331

[truncated: 1 more sheets: Sheet6]
