# Supplementary material for: Genome-Wide Investigation and Co-Expression Network Analysis of SBT Family Gene in Gossypium
Source: Int J Mol Sci. 2023 Mar 17;24(6):5760. doi: 10.3390/ijms24065760 (PMC10056545; doi:10.3390/ijms24065760)
Supplement: Supplementary file 1 [file ijms-24-05760-s001.zip › TableS11.xlsx]

## Sheet: Sheet1
ID	leaf_12h_ck_1	leaf_12h_ck_2	leaf_6h_ck_1	leaf_6h_ck_2	leaf_3h_ck_1	leaf_3h_ck_2	leaf_1h_ck_1	leaf_1h_ck_2	leaf_12h_PEG_1	leaf_12h_PEG_2	leaf_6h_PEG_1	leaf_6h_PEG_2	leaf_3h_PEG_1	leaf_3h_PEG_2	leaf_1h_PEG_1	leaf_1h_PEG_2	leaf_12h_salt_1	leaf_12h_salt_2	leaf_6h_salt_1	leaf_6h_salt_2	leaf_3h_salt_1	leaf_3h_salt_2	leaf_1h_salt_1	leaf_1h_salt_2		leaf_1h_PEG/CK	leaf_3h_PEG/CK	leaf_6h_PEG/CK	leaf_12h_PEG/CK	leaf_1h_salt/CK	leaf_3h_salt/CK	leaf_6h_salt/CK	leaf_12h_salt/CK
Gh_A01G1728	0	0	0	0	0	0	0	0	0	0	0	0	0	0	0	0	0	0	0	0	0	0	0	0		Na	Na	Na	Na	Na	Na	Na	Na
Gh_A01G1833	0	0	0	0	0	0	0	0	0	0	0	0	0	0	0	0	0	0	0	0	0	0	0	0		Na	Na	Na	Na	Na	Na	Na	Na
Gh_A03G0199	18.064	15.3755	0.431218	0.462353	0.742793	0.874466	0.748039	0.493424	22.4877	23.1666	2.56245	2.64705	4.56213	4.74516	1.07008	1.20387	5.44547	4.58234	3.47517	3.25872	0.810816	0.681515	1.22669	1.00134		0.901657	2.52933	2.54418	0.453716	0.867309	-0.116621	2.91392	-1.73823
Gh_A03G1278	4.32647	5.68334	3.38712	2.51424	4.93687	2.90601	3.11361	2.86209	2.73265	3.38795	2.77059	3.9096	2.49398	2.79716	3.32516	3.74088	2.45671	1.58212	1.79978	1.14856	3.37491	4.00016	5.00298	5.24353		0.240572	-0.520112	0.173516	-0.704608	0.778834	-0.0438648	-1.02127	-1.33067
Gh_A04G1215	0	0	0.361598	0.387706	0	0	0.0696965	0.0827523	0.210693	0.24747	0	0.123316	0	0	0	0	0.121768	0.205849	0	0	0	0.0816407	0	0		1.16252	Na	-1.37073	0.425663	1.16252	-0.529087	-1.13914	-0.102674
Gh_A05G1759	1.31244	1.27646	0.434705	0.699138	0.3744	0.440769	0.754089	0.795864	1.77304	1.93377	0.679783	0.296495	0.657003	0.933373	0.154105	0.346744	0.146387	0.164979	0.125117	0	0.363277	0.58888	0.927456	0.841197		-1.74474	0.946875	-0.296266	0.516621	0.189233	0.18722	-1.9184	-3.05809
Gh_A05G2619	3.99967	4.25245	3.45593	3.45842	4.7624	3.03692	3.37499	4.0072	4.29584	4.25729	2.30584	1.88572	2.08928	1.60774	2.85867	3.21607	3.41377	3.23525	2.6525	2.03128	3.85076	3.7453	4.91555	4.81504		-0.278417	-1.05313	-0.72939	0.0523502	0.403711	-0.00203661	-0.574723	-0.311466
Gh_A06G1017	5.46377	5.89581	3.75152	3.56916	1.6838	2.35732	2.42388	2.70864	4.92599	4.91794	3.90001	3.67597	3.03462	2.80792	1.61091	1.77016	2.29533	2.32616	3.61949	3.62697	3.2234	2.79155	3.56985	3.23101		-0.601566	0.551075	0.0492715	-0.205559	0.406481	0.590391	-0.0142543	-1.29647
Gh_A06G1309	9.07729	9.32092	4.00878	3.807	3.5513	3.94856	7.5943	7.44417	3.60381	3.9977	3.00904	2.73423	0.634728	0.553333	3.97917	4.1569	3.66417	3.65137	0.593386	0.432777	2.10576	2.01706	2.03639	1.5958		-0.886526	-2.65962	-0.44569	-1.27702	-2.06037	-0.861539	-2.94654	-1.3304
Gh_A06G1420	0	0	0	0	0	0	0	0	0	0	0	0	0	0	0	0	0	0	0	0	0	0	0	0		Na	Na	Na	Na	Na	Na	Na	Na
Gh_A06G1899	0	0	0	0	0	0	0	0	0	0	0	0	0	0	0	0	0	0	0	0.122512	0	0	0	0		Na	Na	Na	Na	Na	Na	-0.236306	Na
Gh_A07G0036	0	0	0	0	0	0	0	0	0	0	0	0	0	0	0	0	0	0	0	0	0	0	0	0		Na	Na	Na	Na	Na	Na	Na	Na
Gh_A07G0811	3.66701	0	0	0	0	0	0	0	0	0	0	0	0	0	0	0	1.63605	1.84383	2.79666	3.05955	0	2.19381	0	0		Na	Na	Na	-2.2155	Na	1.84492	4.10491	1.13736
Gh_A07G1418	3.54132	4.18229	1.4662	2.20088	1.01024	0.59466	0.79129	0.671083	8.03055	9.23158	0	0.400014	0	0.157406	0.519775	0.584759	1.77747	1.78064	0.844002	0.92334	0.735168	0.926896	0.83418	1.58885		-0.402484	-2.24433	-2.78422	1.16175	0.659786	0.0908951	-1.02496	-1.11318
Gh_A08G0801	5.75192	5.61845	2.92508	2.47601	2.65189	2.26344	8.87239	10.1468	5.38221	5.47878	3.1297	2.78261	2.28801	2.10729	5.04835	5.06551	2.5144	2.86295	1.90535	1.7936	4.11697	4.10154	4.10575	3.93243		-0.907878	-0.158028	0.132985	-0.0660812	-1.2396	0.746105	-0.54179	-1.08325
Gh_A08G1305	50.6277	54.3258	25.5989	28.2	18.7452	19.8777	24.4623	25.2132	38.8629	39.8805	23.3092	23.0222	23.3716	23.5686	17.1161	18.0713	20.5327	20.2094	23.8135	24.0114	25.0935	26.0938	31.1488	31.6866		-0.497842	0.281975	-0.213926	-0.413744	0.339155	0.406674	-0.168139	-1.36431
Gh_A09G0257	0	0	0	0	0.182047	0.214318	0	0	0	0	0.132214	0	0	0	0	0	0	0.0802187	0	0	0	0	0	0		Na	-0.216497	-0.18133	Na	Na	-0.216497	Na	-0.541762
Gh_A09G0495	0	0	0	0	0	0	0	0	0.0825724	0.0969853	0	0	0	0	0	0	0.0954438	0.107565	0	0	0	0	0	0		Na	Na	Na	-0.92575	Na	Na	Na	-0.746569
Gh_A10G0538	0	0	0.230395	0	0	0	0	0	0	0	0	0	0	0	0	0	0.155171	0.262318	0	0	0	0	0.163852	0		Na	Na	-0.219287	Na	-0.0265707	Na	-0.219287	0.247053
Gh_A10G2239	1.16534	1.03625	0.540378	0.331083	0.465414	0.391369	0.922522	0.953999	1.43938	1.05664	0.531163	0.473877	1.28341	1.28458	0.301034	0.33867	0.363945	0.49806	0.711003	0.534764	0.709636	0.697173	1.81172	1.55359		-1.55488	1.58905	0.246253	0.166404	0.838625	0.720776	0.543798	-1.36797
Gh_A11G0004	0.784484	0.726646	0.692898	0.557195	0.447581	0.878205	0.868097	0.554998	0.403733	0.592755	1.51696	1.77224	0.959961	1.2088	1.10536	0.690866	0.466667	0.460193	0.698005	0.327265	0.796187	1.25153	1.60151	1.60899		0.332256	0.780886	1.39989	-0.62608	1.20955	0.671011	-0.378564	-0.704182
Gh_A11G0239	0	0	0	0	0	0	0	0	0	0	0	0	0	0	0	0	0	0	0	0	0.354713	0.383332	0	0		Na	Na	Na	Na	Na	1.11709	Na	Na
Gh_A11G1380	9.48343	7.50872	9.81057	9.04258	9.19078	6.98065	14.265	13.3134	4.71348	4.59388	5.70599	5.63486	3.46841	3.23361	3.17282	2.67712	1.39104	0.914492	1.48615	0.867119	4.31503	3.73054	4.77377	3.8635		-2.24138	-1.25806	-0.732107	-0.858735	-1.68209	-0.997397	-3.05259	-2.90338
Gh_A11G3082	2.07051	1.3324	1.15502	1.54802	0.994789	0.585566	3.28373	2.97369	1.0095	1.18571	1.35465	0.787794	1.81841	1.085	1.94494	2.1881	0.437572	0.657527	0.747986	0.636454	1.08589	1.10831	4.41515	4.1349		-0.599093	0.880003	-0.372266	-0.602311	0.451363	0.523437	-0.954565	-1.63065
Gh_A12G1397	0	0	0	0	0	0	0	0	0.218554	0.256702	0	0	0	0	0	0	0	0	0	0	0	0	0	0		Na	Na	Na	0.478507	Na	Na	Na	Na
Gh_A13G0702	0	0	0	0	0	0	0	0	0	0	0.167151	0.182262	0	0	0	0	0	0	0	0	0	0	0	0		Na	Na	0.0380481	Na	Na	Na	Na	Na
Gh_A13G1643	0.511581	0.568636	0	0	0	0	0	0	0	0	0	0	0	0	0	0	0	0	0	0	0	0	0	0		Na	Na	Na	-1.6657	Na	Na	Na	-1.6657
Gh_D04G0820	0	0	0	0	0	0	0	0	0.0980883	0	0	0	0	0	0	0	0	0	0.0969045	0	0	0.0760157	0	0		Na	Na	Na	-0.396691	Na	-0.580583	-0.40545	Na
Gh_D04G1950	0	0	0	0	0	0	0	0	0	0	0	0	0	0	0	0	0.0674647	0.0760329	0	0	0	0	0	0		Na	Na	Na	Na	Na	Na	Na	-1.24708
Gh_D05G1719	0.407129	0.452535	0.539397	0.289172	0	0.546922	0.9357	0.987536	0	0.184576	0	0	0	0	0.478048	0.537815	0	0	0	0	0	0	0.767213	0.417515		-0.922807	-0.8429	-1.2161	-1.27688	-0.764212	-0.8429	-1.2161	-1.33622
Gh_D05G1733	5.89118	5.87413	4.59124	4.43047	5.83262	5.81911	8.6282	9.03613	5.35038	6.5985	2.01031	2.11377	3.5852	3.57354	5.28977	5.356	1.35284	1.30685	0.396436	0.361418	2.87763	3.6281	7.67318	7.10761		-0.730202	-0.702768	-1.12955	0.0144238	-0.257788	-0.850424	-3.57472	-2.14542
Gh_D05G1954	1.31244	1.82351	0.652057	0.466092	0.3744	0.440769	1.50818	1.39276	1.3931	1.19001	0.40787	0	0	0.116672	0.616422	0.43343	0.658741	0.577425	0.125117	0.136878	0.181638	0	0.927456	1.00944		-1.48745	-1.52831	-1.06598	-0.264849	-0.582925	-1.209	-2.07472	-1.32674
Gh_D05G2165	1.53603	1.06709	3.05259	2.182	1.31456	0.773794	2.84381	2.67793	0.148222	0.522281	0.795597	0.867521	0.128156	0.273097	0.9018	1.21746	0	0.193086	0.146433	0.160198	0.744044	1.03381	0.723643	0.787609		-1.39709	-2.43057	-1.6353	-2.20208	-1.87002	-0.201585	-4.07472	-2.82098
Gh_D05G2843	1.19817	1.59816	0.317487	0	0.273444	0.321916	0.489555	0	1.29494	0.434563	0	0	0.159948	0	0.112551	0.126623	0.53457	0.240985	0	0	0	0	0.22579	0		-1.27294	-0.847396	-0.450581	-0.883361	-0.558245	-0.80343	-0.450581	-1.94689
Gh_D06G0045	0	0	1.57601	1.6898	0	0	0.607539	0	0	0	0	0	0	0	0	0	0	0.598124	0	0	0	0	0	0		-0.918721	Na	-3.26296	Na	-0.918721	Na	-3.26296	0.907455
Gh_D06G1768	0	0	0	0	0	0	0	0	0	0	0	0	0	0.0720789	0.0476026	0.053554	0	0	0	0	0	0	0	0		-1.75145	-0.618943	Na	Na	Na	Na	Na	Na
Gh_D07G2351	23.8128	22.9131	12.0075	10.8549	11.7612	15.9946	11.4358	13.9013	23.8702	22.7194	9.27808	9.79568	8.0657	7.96201	13.104	12.3009	11.417	10.0077	4.33694	4.74462	16.7241	12.9704	9.87896	11.2989		0.00999702	-0.775272	-0.260083	-0.00438727	-0.255082	0.102766	-1.33158	-1.12781
Gh_D08G1360	0	0.326062	0	0	0.334733	0.394071	0.599284	0.711544	0	0	0.243105	0	0	0	0.137778	0.155004	0.261755	0.442498	0.223722	0.244752	0	0	0	0.30083		-2.15977	-1.0952	0.258022	-0.469806	-1.52985	-1.0952	0.460979	0.531603
Gh_D08G1597	43.1248	42.3216	22.2822	22.9076	17.193	17.3961	21.318	23.1877	30.3047	32.0866	20.9573	20.4968	17.8848	18.39	16.1808	15.8584	18.7861	19.1244	18.2615	17.7696	19.8382	20.2938	25.5924	25.683		-0.472951	0.0685351	-0.124433	-0.4542	0.205549	0.214367	-0.326751	-1.17242
Gh_D09G0503	0	0	0.248679	0.266634	0.10709	0.126074	0	0	0.217348	0.255285	0	0	0.125282	0.133487	0	0	0.0837426	0.0943781	0.0715748	0	0.155863	0.0561461	0.0884272	0.0962436		Na	0.154392	-0.599038	0.470523	-0.881872	-0.312779	-1.22304	-0.935256
Gh_D10G0377	0	0	0	0	0	0	0	0	0	0	0	0	0	0	0	0	0	0	0	0	0	0	0	0		Na	Na	Na	Na	Na	Na	Na	Na
Gh_D10G1101	5.25636	5.68884	13.9281	13.1653	8.8391	9.84852	7.77117	8.55584	6.08665	7.02364	8.48293	8.37483	6.64756	6.29592	8.38091	7.45527	4.99886	5.14687	8.22857	9.00207	13.0179	12.8269	6.25601	6.66714		-0.0448369	-0.528282	-0.683986	0.257834	-0.336365	0.46986	-0.653848	-0.108452
Gh_D10G2586	1.10707	1.10101	0.540378	0.331083	0.265951	0.234821	0.357105	0.353333	0.494786	0.475487	0.338013	0.263265	0.155565	0.290067	0.355768	0.461823	0.155976	0.175786	0.444377	0.486149	0.354818	0.557738	0.494106	0.597535		0.19045	-0.234409	-0.503784	-1.18661	0.613233	0.831972	0.13601	-2.73714
Gh_D11G0249	0	0	0	0	0	0	0.337882	0.401175	0	0	0	0	0	0	0	0	0	0	0	0	0	0	0	0		-1.11484	Na	Na	Na	-1.11484	Na	Na	Na
Gh_D11G0254	0.640748	1.42442	10.187	10.0123	3.65574	4.30379	2.618	3.49696	0	0	3.18604	2.89506	1.71071	2.27842	1.50473	1.01571	0	0.322179	2.44335	0	1.77357	2.29999	0.603728	0		-1.29129	-1.00657	-1.7335	-2.4905	-3.23949	-0.973744	-3.96995	-2.02933
Gh_D11G0999	4.10771	13.6975	5.44222	5.83517	4.68725	5.51814	25.1752	29.8911	0	11.1736	3.40418	7.42385	2.74175	0	5.7879	4.34101	1.83267	2.06542	0	0	4.54799	7.37239	11.6111	8.425		-2.45225	-2.89711	-0.164748	-2.44427	-1.47173	0.187219	-5.05088	-1.9469
Gh_D11G1400	0.435896	0.726765	0.57751	0.619208	0.746092	1.17113	1.55838	1.45381	0.0841249	0.0988088	0	0.0984742	0.654626	0.929996	1.22838	1.03647	0.145857	0.164382	0.166219	0.181844	0.120654	0.325972	2.56695	3.24086		-0.415725	-0.260644	-2.20846	-2.62608	0.938273	-2.23678	-1.78224	-1.86193
Gh_D12G0691	43.1882	44.1045	65.0869	59.4335	81.3144	86.301	121.454	107.868	42.717	45.523	35.3439	31.7094	60.7161	52.7904	74.6725	74.7374	55.6381	51.7106	30.2615	25.449	47.0702	41.6632	57.2245	57.0234		-0.615563	-0.565267	-0.893636	0.0149215	-1.00267	-0.91965	-1.16428	0.297485
Gh_D12G1438	0.442627	0.688788	0.234571	0.125754	0	0	0	0	0.0683391	0.0802676	0.0733635	0.0799958	0	0	0.207892	0.0467766	0.118488	0.133536	0	0	0.0490069	0.105922	0	0		-0.785688	Na	-1.16475	-2.89824	Na	-1.23851	-0.0147797	-2.13409
Gh_D13G2038	3.15639	2.63131	3.13637	2.24189	1.80085	2.12008	0	0	3.65496	1.43098	1.30789	0.713066	0.526694	0	1.8531	1.25087	0	0.793541	0.601808	0.658379	0.873675	0.472082	2.23052	2.42768		3.16283	-2.70708	-1.45723	-0.333599	3.77487	-1.60526	-2.07472	-2.97204
Gh_A01G0158	17.9936	20.0003	63.6957	63.5021	44.2726	39.657	25.8465	28.4718	18.6654	18.8643	35.8815	34.5522	11.0718	12.9965	29.0509	32.9801	13.1708	14.4194	22.2997	23.9268	36.7316	37.3403	35.4974	35.4636		0.190338	-1.80449	-0.852991	-0.0157403	0.387275	-0.178117	-1.46117	-0.461076
Gh_A01G1029	7.84075	8.92777	18.2424	16.5713	25.7498	24.6626	29.0083	29.0497	3.3955	3.29458	13.3919	13.0473	24.1886	24.4807	22.0059	21.9783	2.68763	2.30778	11.3762	11.7276	37.2655	37.1258	42.2543	41.6747		-0.400509	-0.050457	-0.395435	-1.32279	0.53164	0.561688	-0.590028	-1.74823
Gh_A01G1487	1.13462	0.720662	2.57697	3.68405	1.2947	1.30646	0.910618	0.589744	1.00102	1.17575	2.01491	2.19706	1.08188	1.49855	1.14194	1.54165	0.144632	0.407503	0.370852	0.405713	0.717846	0.678792	2.44357	1.99468		0.856442	-0.0305865	-0.550339	0.262724	1.59103	-0.897747	-2.98976	-1.89713
Gh_A01G1681	0.279608	0.310792	0.246965	0.264796	0.106352	0.25041	0.142804	0.113037	0.719499	0.760578	0.0772397	0.0842225	0.435466	0.463985	0.218876	0.196992	0.291079	0.281183	0.213244	0.311053	0.309578	0.334555	0.0878178	0.0955803		0.70871	1.46175	-1.66475	1.32737	-0.47173	0.979704	0.0102388	-0.0432174
Gh_A01G1736	10.0771	9.85685	3.20423	2.86299	3.9096	3.51967	3.49975	3.78868	3.57845	4.38581	5.17773	6.55643	0.538089	0.573327	2.17718	2.12989	0.269756	0.202677	1.69078	1.84971	5.13232	7.11386	0.189898	0.62005		-0.757854	-2.73956	0.943865	-1.33098	-3.4076	0.703891	-0.776256	-5.41358
Gh_A01G1745	3.07207	2.77443	0.508765	0.27275	0.438186	0.257931	0.490312	0.349295	1.63044	0.870469	0.318239	0.347009	0.768936	0.819292	0	0	0.428317	0.193086	0.439299	0.480594	0.212584	0.229735	0.180911	0.196902		-1.28354	1.23936	-0.164747	-1.29314	-1.13269	-0.605262	0.302722	-3.34367
Gh_A02G0615	1.32616	1.36878	0.125501	0.134562	0	0	0.145138	0.114884	2.12065	2.66258	0	0	0.0632262	0	0	0	0.464886	0.381038	0.21673	0.237103	0	0.0566704	0.178506	0.291427		0.396733	-0.71347	0.38755	0.818593	0.820752	-0.792434	0.802721	-1.67859
Gh_A02G1246	0	0	0	0	0	0	0	0	0	0	0	0	0	0	0	0	0	0	0	0	0	0	0	0		Na	Na	Na	Na	Na	Na	Na	Na
Gh_A02G1480	1.93111	1.94525	0.719574	0.685804	0.895195	0.891748	0.585601	0.548919	2.51566	2.18871	0.600136	0.708923	0.926429	0.901265	0.566874	0.70152	0.700026	0.758588	0.966504	0.855956	0.768376	0.577649	0.796046	1.11396		0.153501	0.0323969	-0.10701	0.275816	0.731983	-0.423416	0.372686	-1.41126
Gh_A02G1604	0	0	0	0	0	0	0	0	0	0	0	0	0	0	0	0	0	0	0	0	0	0	0	0		Na	Na	Na	Na	Na	Na	Na	Na
Gh_A03G0083	0.227539	0	0	0	0	0	0	0	1.22958	1.4442	0.377136	0.205615	0.151874	0.16182	0	0.240463	0.710622	1.02969	0	0	0.251928	0.136127	0	0		0.25014	-0.116902	0.71198	2.76032	Na	0.123448	Na	2.12079
Gh_A03G0138	75.3479	83.1199	77.5038	76.1076	56.3828	58.4937	70.0033	76.5728	52.6129	54.9301	61.3447	62.4425	62.4228	61.7985	67.2217	69.724	38.938	41.9794	38.4059	39.9627	88.5594	95.3647	82.9459	80.7647		-0.0968363	0.113054	-0.31142	-0.557874	0.16082	0.678282	-0.971163	-0.96895
Gh_A03G0451	3.08527	3.75596	0.97324	0.730458	0.419113	0.197363	0.6378	0.623638	3.28907	4.06299	0.608774	0.73019	0.490311	0.574663	0.483027	0.349339	0.721026	0.812598	0.448189	0.49032	0.569326	0.395525	1.24586	0.753327		-0.618541	0.884111	-0.338709	0.102822	0.619267	0.722417	-0.846883	-2.15292
Gh_A03G0631	0.0965642	0.0536668	0	0	0	0	0.0246591	0.0585567	0.0372724	0.0437783	0.0400127	0.04363	0	0.0343371	0.022677	0.0255122	0	0	0	0	0.0267286	0	0	0		-0.659769	-1.15385	-2.02457	-0.833597	2.16149	-1.33454	Na	1.2397
Gh_A03G0714	501.439	528.745	551.746	567.082	358.828	378.447	196.225	207.364	674.429	691.063	707.027	732.093	429.628	453.142	226.944	233.392	268.552	273.248	488.04	515.355	543.7	548.535	365.774	379.649		0.190209	0.259834	0.363115	0.406919	0.885472	0.567505	-0.157498	-0.926617
Gh_A03G0960	0.973767	1.00506	1.19797	1.08686	0.793679	0.654061	0.603904	0.506138	0.268472	0.252266	0.345852	0.439971	0.742805	0.791451	0.490025	0.514536	0.0930963	0.10492	0.530463	0.464262	0.577574	0.624174	0.589825	0.570633		-0.138861	0.0897514	-1.54853	-1.92653	0.0695001	-0.263013	-1.20121	-3.32335
Gh_A03G2165	9.97476	10.3641	11.6832	11.9106	14.2688	12.8171	12.2931	12.3166	5.41249	5.37415	7.90696	7.9033	10.4691	8.89297	14.8695	14.5898	3.9988	3.81612	4.79591	4.40243	10.2036	10.1187	10.6243	11.4893		0.259432	-0.48703	-0.57748	-0.914738	-0.155397	-0.412416	-1.36022	-1.38007
Gh_A04G0029	1.74301	1.67908	1.61649	1.65067	1.25965	1.32684	1.33531	1.55021	1.92862	2.05454	1.05928	0.997541	0.853156	0.867709	1.20069	1.0745	0.64804	0.555061	1.01914	0.921037	1.06141	1.14704	1.58756	1.37039		-0.341055	-0.587426	-0.668192	0.218566	0.0358796	-0.22856	-0.753617	-1.51219
Gh_A04G0955	4.09768	1.95201	0.775563	2.49468	3.33986	2.35915	0.89692	0.709956	2.2595	1.59233	0.485124	0.528981	2.34434	2.08155	1.92459	2.16521	1.04468	0.883021	0	0	1.29625	1.05063	1.65469	2.40127		1.3551	-0.345607	-1.45723	-0.576312	1.32075	-1.26623	-3.03248	-1.55809
Gh_A04G1123	1.7861	1.58823	1.18318	0.761166	0.815235	1.31966	0.68416	0.649855	1.17199	1.45754	1.25816	1.2105	0.238431	0.254046	0.629167	0.519073	0.0796873	0.224519	0.54487	0.521577	0.791015	1.01512	0.420725	0.457915		-0.222536	-2.07532	0.378983	-0.365868	-0.603247	-0.211013	-0.832008	-3.65441
Gh_A05G0291	0	0	0	0	0	0	0	0	0	0	0	0	0	0	0	0	0	0	0	0	0	0	0	0		Na	Na	Na	Na	Na	Na	Na	Na
Gh_A05G0834	0	0	0	0	1.29097	2.4317	1.27119	1.64653	0.349349	0.820654	0.187517	0.408938	0.755137	0.160918	1.16901	1.31517	0	0	0.345132	0	1.75366	1.21831	1.27918	0.696127		-0.222536	-2.34561	0.703917	1.65519	-0.616483	-0.277585	0.510807	Na
Gh_A05G0951	0.192917	0.214433	0	0	0	0	0.0985287	0.350956	0.595707	0.349843	0.319752	0.174329	0.128765	0.137198	0	0	0	0	0	0	0	0	0.181771	0		-0.129418	-0.355035	0.473848	1.1664	-0.0811247	Na	Na	-0.258719
Gh_A05G1162	36.9945	39.0449	23.2697	22.4631	25.8343	26.6514	16.0035	16.4182	39.1443	39.4692	31.7706	31.7427	38.5966	38.1779	18.9102	19.2086	14.761	13.8484	30.6171	29.649	43.6731	41.4018	32.0531	32.7322		0.233617	0.548856	0.474054	0.0485423	0.998746	0.69647	0.398156	-1.41047
Gh_A05G1300	0	0	0.478625	0.513183	1.23668	1.4559	0.738024	0.438136	0	0	0	0	0.964509	1.02767	1.01805	1.14533	0.322354	0.726587	0.551031	0	1.59992	1.08063	1.36155	1.85237		0.925191	-0.43057	-1.54365	Na	1.48172	-0.0292555	-0.69535	1.50936
Gh_A05G1445	4.20728	3.95084	1.92212	1.54568	1.32438	1.16936	1.9265	1.80351	2.07194	3.02555	1.86358	1.8354	1.35569	1.13494	1.56723	1.26488	1.84473	1.96959	0.719192	0.726275	1.56613	1.5189	2.18715	1.71097		-0.404786	-0.00469646	0.101616	-0.703434	0.0535385	0.309597	-1.25395	-1.09687
Gh_A05G1516	77.4354	83.2249	39.3205	43.8717	16.3312	19.4286	19.0049	21.0119	84.3172	85.9211	23.2221	22.5987	14.8822	13.4997	15.6376	15.8413	12.7035	12.2716	14.4769	17.2204	20.1828	21.2704	11.7817	13.1321		-0.344434	-0.329649	-0.858417	0.0844155	-0.683966	0.21808	-1.39535	-2.68473
Gh_A05G1565	1.90028	2.93363	0.839216	0.749842	0.843261	0.709103	1.29404	1.0243	2.03745	2.10592	1.39984	1.43099	0.845581	0.825877	0.545429	0.557837	1.03622	1.11474	0.966174	0.88083	1.16887	1.57897	1.59155	1.19091		-1.06157	0.111948	0.835251	-0.188842	0.257988	0.81299	0.217759	-1.13543
Gh_A05G1808	7.17716	6.16156	4.56117	5.05628	8.32292	7.44671	4.35103	3.64456	6.12615	5.34369	5.31927	4.48194	6.85469	5.97567	4.35757	3.88489	2.68145	2.46454	3.60463	3.45662	5.84677	5.23632	4.89318	4.54779		0.047148	-0.298751	0.0239357	-0.216946	0.244418	-0.50875	-0.444134	-1.37119
Gh_A05G1816	20.032	16.8831	26.54	25.3292	12.5595	13.603	11.4677	11.213	19.5426	21.5565	17.3308	15.7148	19.3948	19.4125	17.4731	17.2149	5.59812	5.31292	9.56942	9.55063	16.3297	15.9351	20.7413	18.2855		0.613023	0.569976	-0.651754	0.15843	0.780229	0.303501	-1.4394	-1.75365
Gh_A05G2114	19.3368	20.4699	10.0036	10.4643	6.93471	7.91661	6.11366	5.47209	22.4623	23.5444	7.32571	8.32081	6.76063	7.20337	6.31421	6.90901	3.61521	3.61135	7.44389	7.22171	8.46183	7.93261	10.0642	11.3315		0.191476	-0.0864443	-0.390079	0.209018	0.88465	0.145023	-0.480727	-2.46105
Gh_A05G2357	7.58902	6.67803	4.60833	3.59351	2.88657	3.82305	3.22996	3.25975	5.3703	6.30768	5.24103	6.00058	5.0654	5.17225	3.41588	3.67586	4.79665	5.56483	2.17043	2.90211	5.42658	5.67523	2.68146	2.91848		0.127031	0.623694	0.462657	-0.290612	-0.214021	0.740321	-0.697277	-0.462486
Gh_A05G3101	4.3721	4.41791	2.23801	1.97615	2.60785	2.93666	3.90769	4.15764	4.06551	4.23455	2.63512	2.87334	2.78557	3.03866	3.78026	3.99036	1.59597	1.84862	2.19767	2.48717	4.40065	4.99349	7.77087	7.84635		-0.0535382	0.0721853	0.387844	-0.0830227	0.954008	0.760364	0.152785	-1.3554
Gh_A05G3776	0.565396	0.538674	0.321035	0.458953	0.368666	0.108505	0.37127	0.293878	0.498823	0.585892	0.0669371	0.218965	0.431293	0.402096	0.30349	0.256075	0.360362	0.446742	0.308002	0.269563	0.536569	0.57986	0.0761042	0.165663		-0.244735	1.05807	-1.66475	-0.0297557	-1.55669	1.4797	-0.413757	-0.459893
Gh_A05G4009	27.2078	28.9072	2.50922	3.0841	8.11739	9.49428	16.9157	18.1515	26.0673	28.0624	1.60783	1.50273	6.04313	6.63599	10.6093	11.0326	11.3351	11.2649	1.97285	2.11976	4.24498	4.97436	24.7653	24.8701		-0.695675	-0.471233	-0.839694	-0.0522848	0.50214	-0.933903	-0.443953	-1.31141
Gh_A06G0198	0.224583	0.249631	0.297546	0.159515	0.512538	0.301697	0.458807	0.272376	0.43343	0.407268	0.465297	0.507361	0.224852	0.159718	0.210964	0.237339	0.250497	0.282311	0.0856398	0.0936901	0.49731	0.604613	0.317412	0.230313		-0.65977	-1.05313	1.15718	0.827366	-0.386767	0.479699	-1.28224	0.167516
Gh_A06G1197	0.426383	0.236968	0.564906	0.605694	0	0	0	0	0.164578	0.193305	0	0	0	0	0.100131	0.11265	0	0	0	0	0.354063	0.38263	0	0		-0.678667	Na	-1.78277	-0.833596	Na	1.11444	-1.78277	-0.902886
Gh_A06G1377	1.74482	2.21647	0.660479	0.826195	0.568854	0.669693	0.976003	0.90691	1.41109	1.35605	0.619706	0.525568	0.887318	0.945427	0.468287	0.482931	1.03794	0.919101	0.88713	0.970522	0.873926	0.944435	3.05316	2.47098		-0.984317	0.569429	-0.372267	-0.507561	1.5457	0.557702	0.328956	-1.00966
Gh_A06G1836	50.8917	45.3403	24.3623	20.4188	19.6528	17.3959	17.3941	14.92	18.9937	16.3208	14.595	14.1592	28.9552	25.8784	17.1515	14.0956	8.31957	7.3577	12.345	11.1285	17.4201	16.5014	33.4317	29.6141		-0.051133	0.566044	-0.633667	-1.448	0.965828	-0.12507	-0.928181	-2.61816
Gh_A07G0162	0.218526	0.291477	0.405328	0.496679	0.249356	0.176135	0.357145	0.397543	0.134957	0.0792565	0.181098	0.19747	0.233373	0.15541	0.328437	0.323312	0.097496	0.109878	0.0333319	0.0364652	0.120974	0.0522937	0.8236	0.627481		-0.209539	-0.138086	-1.2465	-1.28704	0.931947	-1.39774	-3.68592	-1.28593
Gh_A07G0816	1.35196	1.36186	0.223898	0.180048	0.385675	0.454043	0.453132	0.358676	1.43505	1.22585	0.175064	0.19089	0.253796	0.24037	0.198433	0.178593	0.358139	0.403624	0.0966636	0.10575	0.210497	0.176929	0.477693	0.606571		-1.09864	-0.760644	-0.1353	-0.0328737	0.417074	-1.11662	-0.98976	-1.83548
Gh_A07G1126	0	0	0	0.223122	0	0	0.0802195	0.0952465	0	0	0	0	0	0	0	0	0	0	0	0.131049	0	0	0	0		0.959653	Na	-0.196149	Na	0.959653	Na	-0.383863	Na
Gh_A07G1444	2.52388	2.7416	2.73587	2.52599	1.43998	1.07879	2.25579	2.53922	1.54984	1.5083	2.09161	2.59171	1.64631	1.79492	0.835175	0.848663	0.972488	1.06715	1.83736	1.48362	2.19106	2.71101	2.48615	2.88239		-1.5073	0.463846	-0.175165	-0.782809	0.16158	0.967498	-0.671046	-1.36857
Gh_A07G1757	15.3825	16.3209	7.02492	7.28383	7.97852	8.3753	9.8204	10.2113	11.605	12.0457	6.85684	6.79223	8.01159	8.20475	7.52585	7.66626	7.66884	8.05685	4.57708	4.47257	8.96722	9.16783	12.7369	14.1018		-0.398749	-0.011857	-0.0678749	-0.422373	0.420437	0.14949	-0.660824	-1.01132
Gh_A07G1796	11.5699	13.1398	9.99699	11.0761	4.01807	3.7167	7.19369	7.93114	6.21331	6.15755	6.67012	5.68213	2.5182	2.14649	6.85172	7.17673	4.71309	4.93226	2.87734	1.67883	10.9999	10.5331	5.6877	5.67459		-0.107234	-0.733076	-0.773364	-0.995229	-0.410949	1.47788	-2.25934	-1.35463
Gh_A07G1947	3.90432	1.97262	0.9405	0.504204	0.405014	0	0.543833	0.86094	0.274002	0.643658	0.294147	0	0.236908	0	0.500119	0.187548	0.316714	0.356937	0	0.296141	0.196491	0.212344	0.668862	0		-1.15977	-0.386822	-1.62268	-2.72428	-1.02092	-0.36132	-1.61781	-3.0451
Gh_A07G1963	9.85599	10.9552	4.52008	4.55272	3.02791	2.73136	3.53771	3.97053	5.6133	5.5307	3.48423	3.42552	2.89823	3.08803	2.75158	2.62215	3.99753	3.9854	1.94488	1.98394	4.40693	3.87596	3.47434	3.00395		-0.480568	0.0569585	-0.392957	-0.899117	-0.214274	0.523193	-1.20751	-1.38036
Gh_A08G1007	26.5241	20.2993	18.4348	15.442	7.9387	5.84123	1.99869	1.84574	33.2314	30.3581	11.1708	9.0373	4.06319	4.94776	10.2113	9.64988	8.72988	6.7777	10.6118	6.89304	9.14713	8.84459	7.37459	7.13462		2.36968	-0.602893	-0.747798	0.452947	1.91707	0.40147	-0.980205	-1.59292
Gh_A08G1149	0.262895	0.292215	0.0870762	0.0933634	0.149993	0.0882909	0	0	0.304422	0.178779	0.0544672	0	0.350946	0.37393	0	0	0.146615	0.033047	0.200498	0.219346	0.291073	0.275238	0.309633	0.471803		Na	1.65439	0.0938575	-0.248634	1.16884	1.29841	1.21776	-1.99345
Gh_A08G1387	0.731532	0.487871	0.193839	0.207834	0.166948	0.196543	0.373616	0.354882	1.58122	1.32659	0.121248	0.13221	0.488272	0.416199	0.0687169	0.0773081	0.261101	0.220696	0	0	0.242982	0.0875288	0.551414	0.450116		-2.32073	1.31536	-0.664749	1.2776	0.452269	-0.312782	-0.239611	-1.31538
Gh_A08G1950	0.333503	0.185349	0	0	0	0	0	0	0.51491	0.302393	0.138192	0.30137	0.111301	0.11859	0	0	0.371984	0.419227	0.254348	0.278257	0	0	0.314234	0.342011		Na	-0.56531	0.26357	0.6664	0.947406	Na	0.646076	0.667514
Gh_A08G2231	0.829952	0.768762	0.366529	0.392994	0.947046	0.557463	0.353235	0.503285	0.32035	0.752533	1.26098	0.99998	0.646291	0.590242	0.519747	0.804	0.370286	0.139105	0.949451	0.461645	0.91891	0.41377	0.391	0.425562		0.616501	-0.23441	1.56497	-0.702081	-0.047733	-0.236779	0.802721	-1.81538
Gh_A08G2309	1.73907	1.38073	1.31661	0.705836	3.40188	3.00369	0.761313	1.35589	1.72609	3.1537	1.853	2.02051	1.49242	1.23679	1.16686	2.23167	0.665052	0.124919	0.757893	1.03642	0.550136	0.594521	0.936341	1.27388		0.667477	-1.23441	1.00517	0.590403	0.104267	-2.4827	-0.121279	-2.42657
Gh_A09G0313	4.88781	6.42074	2.35482	1.89364	1.52111	2.38767	1.36165	1.88617	10.2907	10.0724	1.84121	1.60613	2.0761	1.26403	2.29569	2.34792	3.37019	2.90452	1.01665	1.48295	1.96789	1.06333	3.34939	2.73409		0.534748	-0.234411	-0.296268	0.861839	0.917072	-0.397744	-0.782243	-0.840399
Gh_A09G2137	0.180876	0.402098	0	0	0.412791	0.485965	0.184758	0.109684	0	0	0.149897	0.163449	0	0	0.339814	0.286724	0	0	0	0	0.100132	0	0.170426	0.18549		1.13271	-1.3976	-0.119129	-0.665739	0.320748	-1.77941	Na	-0.665739
Gh_A09G2203	6.63409	7.58316	2.18176	2.13878	1.55696	1.70655	1.94643	2.28251	3.95904	3.92484	3.15834	3.40135	1.97848	1.94074	1.61319	1.81487	2.18313	2.12919	1.93769	2.31612	1.66699	1.80148	2.39392	2.31602		-0.300835	0.265592	0.601497	-0.847457	0.159786	0.0883068	-0.0281164	-1.718
Gh_A09G2440	0.775924	0.646845	0.642504	0.413337	0.110674	0.130293	0.24768	0.176446	0.524117	0.527658	0.241136	0.175291	0.0647377	0.206932	0.227771	0.153749	0.302909	0.195074	0.0739702	0.323694	0.161079	0.348151	0.365547	0.397859		-0.159772	-0.0531206	-1.32571	-0.429922	0.867305	0.979703	-1.73569	-1.54321
Gh_A09G2484	0.321216	0.357041	1.27672	1.3689	0	0	0.32811	0.389573	0.99188	0.873759	3.19441	3.77347	0.2144	0.228441	0.301736	0.50919	0.429936	0	0.489954	0.804017	2.66734	2.30604	1.21063	0.988232		0.132709	0.380529	1.39299	1.45888	1.61323	3.8668	-1.07472	-0.324988
Gh_A10G0093	11.3549	10.8543	14.2917	12.4202	16.844	16.9316	11.0766	11.4301	6.74955	6.69219	9.78652	9.54257	15.5369	15.2624	14.6128	14.5198	2.68499	3.59694	6.66809	5.87382	14.772	13.9259	17.9741	15.2544		0.372451	-0.133136	-0.463274	-0.724084	0.557396	-0.235659	-1.09007	-1.83688
Gh_A10G0105	5.60219	5.59014	1.3495	1.26607	2.17929	2.30904	2.14591	2.04603	3.48928	3.57882	0.949642	0.977966	2.42202	2.30899	2.30232	2.42197	1.27812	1.18437	1.79641	2.12462	2.46697	2.47557	5.3385	5.15754		0.172426	0.0761607	-0.439735	-0.663231	1.32435	0.139675	0.57977	-2.18537
Gh_A10G0232	2.81508	2.00259	2.38698	2.07945	1.02792	0.756336	0.74763	0.614546	3.12936	2.96089	1.5864	1.52631	0.676429	0.720727	0.951971	0.892491	0.653099	0.679426	0.944653	0.751601	0.561027	0.538926	1.16707	1.96309		0.443455	-0.336646	-0.517792	0.358428	1.15901	-0.681263	-1.40275	-1.83364
Gh_A10G0347	1.31475	1.58316	0.435472	0.466914	1.00016	1.03028	0.447656	0.531512	3.46775	3.9737	0	0	0.80442	0.779183	0.257295	0.231571	4.05719	3.96647	0.417792	0.639892	0.303265	0.327733	0.82586	0.786503		-0.998807	-0.358606	-1.40733	1.36344	0.724428	-1.68701	0.197438	1.47537
Gh_A10G0449	21.9974	24.4507	10.2861	9.19066	2.95305	3.47653	27.0956	25.1092	35.9606	34.0246	23.5916	28.063	6.04573	7.3619	33.4261	38.9726	13.2781	11.0607	4.93425	8.63692	14.3266	13.9342	3.65762	5.3079		0.46858	1.05807	1.404	0.592893	-2.56554	2.14066	-0.574722	-0.936359
Gh_A10G0470	13.9821	13.3489	15.3731	12.6096	25.3555	22.0565	30.283	26.9844	7.9274	6.47044	14.7607	11.6388	17.1162	15.06	26.2411	22.4403	5.51341	4.31745	7.16802	6.97051	21.1335	20.3742	25.2553	23.2634		-0.236357	-0.558709	-0.0871136	-0.931723	-0.237993	-0.188614	-0.977974	-1.48552
Gh_A10G0590	15.7856	15.7373	12.2897	12.0212	5.19955	5.2468	3.57397	4.14477	10.9298	10.9193	6.47356	6.61762	6.08283	5.67104	3.66886	4.04156	4.06595	3.92772	2.8546	3.3945	3.78381	3.79701	3.68006	4.00536		0.000712274	0.169266	-0.893008	-0.528825	-0.00357918	-0.462561	-1.9652	-1.97968
Gh_A10G1339	2.12325	2.21556	0.688912	0.800208	1.5328	1.10599	1.46063	1.62914	2.24121	2.47525	0.538653	0.587349	1.01228	0.924494	1.16006	1.2593	0.908632	1.00224	0.363518	0.39769	1.17542	1.16656	2.04141	2.35517		-0.35194	-0.428582	-0.40056	0.118953	0.507348	-0.153035	-0.965512	-1.18447
Gh_A10G1510	3.76071	5.22516	0	0	3.21847	0	0.240089	0	35.2008	43.4763	1.5583	0.424795	0.941302	0.668631	0.22079	0.745182	1.88759	0	0.71703	1.17665	1.30119	1.96863	0.442929	0.964161		1.00558	0.101015	2.2588	3.14161	1.69362	1.11352	2.43379	-2.96816
Gh_A10G2237	9.61163	8.90299	18.0402	18.205	19.6504	17.2159	20.454	23.7998	12.6757	13.0726	19.9136	17.733	29.404	30.1904	17.117	18.4105	3.2162	4.63152	13.439	14.034	22.3922	22.5217	19.9993	23.41		-0.313687	0.695901	0.0523203	0.476698	-0.028129	0.288006	-0.400099	-1.26111
Gh_A10G2277	17.5731	18.1889	11.7479	11.3365	10.1182	9.09628	10.6631	10.8519	11.7613	11.7676	13.2272	12.8933	7.47884	7.79663	6.7771	6.72991	5.50259	5.18813	10.8201	11.77	10.8439	9.50046	9.87389	9.58935		-0.671588	-0.329246	0.178376	-0.60378	-0.14469	0.0813259	-0.032275	-1.74248
Gh_A11G0236	0	0	0	0	0	0	0	0	0	0	0	0	0	0	0	0	0	0	0	0	0	0	0	0		Na	Na	Na	Na	Na	Na	Na	Na
Gh_A11G0378	0.0765062	0	0.304085	0.326041	0	0	0.0390741	0.0463935	0.0590607	0.0693696	0	0	0	0	0	0	0	0	0	0	0.0423532	0	0	0		1.9974	Na	-0.889229	-0.833269	1.9974	-1.0025	-0.889229	0.575943
Gh_A11G0393	1.19677	1.90035	0.679535	0.485733	1.17053	1.6077	0.960503	0.933076	1.84775	2.32529	0.566743	0.926968	1.48349	1.09429	0.401498	0.361356	1.373	1.03158	1.56467	1.42646	0.75717	0.613695	1.28872	1.40263		-1.31349	-0.106585	0.335251	0.458885	0.506072	-1.00894	1.37872	-0.341612
Gh_A11G1278	2.03497	1.59172	2.99566	2.67663	3.1821	3.34119	2.00166	2.01098	1.04729	0.956741	3.37287	2.92861	1.86133	1.60802	1.94696	1.83195	1.10967	0.871628	2.29923	2.01229	3.12928	3.47194	2.76957	2.70522		-0.0872462	-0.914361	0.150451	-0.846366	0.448156	0.0156158	-0.396651	-0.871839
Gh_A11G1337	9.43162	8.54211	4.47379	3.6941	2.43591	2.76343	5.0549	4.66022	7.4008	7.39047	3.24873	2.77081	2.51293	2.37386	2.91675	2.74819	4.156	4.13738	3.37453	3.1736	4.10396	3.85457	3.94964	3.94053		-0.777619	-0.0871578	-0.438268	-0.279375	-0.298985	0.616333	-0.312957	-1.11409
Gh_A11G1395	6.9907	6.96652	9.26184	8.90327	3.02575	3.88595	6.64826	7.16274	5.58271	5.68288	5.99316	4.79231	1.76988	2.22866	4.86845	5.34974	3.01138	2.66658	1.83844	1.81014	6.00516	5.19173	5.67828	5.19137		-0.435279	-0.787866	-0.760798	-0.309144	-0.34596	0.703429	-2.31553	-1.30023
Gh_A11G2215	0	0	0	0	0	0	0.0218508	0.0259439	0	0	0	0	0.0285564	0.0304265	0	0	0	0	0	0	0.0236845	0.0511909	0.080623	0.0877495		2.83592	-2.52789	Na	Na	1.82075	-2.28755	Na	Na
Gh_A11G2365	3.26792	3.48311	2.90617	3.1796	1.6857	1.92438	1.89766	2.36172	3.14479	3.40958	3.3018	3.11486	2.42026	1.94203	1.32461	1.30099	2.27687	2.40847	3.68723	3.43623	3.51906	3.45482	2.78385	3.02993		-0.689441	0.267493	0.0772278	-0.0430955	0.456153	0.95303	0.2277	-0.52679
Gh_A11G2616	0	0	0	0	0	0	0	0	0	0	0	0	0	0	0	0	0	0	0	0	0	0	0	0		Na	Na	Na	Na	Na	Na	Na	Na
Gh_A11G2826	0	0	0	0	0	0	0	0	0	0	0	0	0	0	0	0	0	0	0	0	0	0	0	0		Na	Na	Na	Na	Na	Na	Na	Na
Gh_A11G3010	1.99669	2.30474	1.22094	1.41819	0.788675	1.23798	1.56888	1.72306	1.06712	0.835587	0.763715	0.97155	1.2302	1.20154	0.973871	0.973891	0.308365	0.308914	0.351412	0.576669	0.850271	0.918872	1.37482	1.33883		-0.755537	0.299143	-0.611288	-1.18381	-0.277246	-0.16078	-1.5475	-2.79711
Gh_A11G3221	30.7134	30.2479	29.9202	27.7497	30.5369	29.4275	21.6839	21.0897	28.7656	27.746	24.7044	23.8767	23.8916	23.8502	17.3423	17.1239	25.441	23.108	18.9456	17.2407	24.6289	25.5351	25.1087	22.4647		-0.311428	-0.328607	-0.24661	-0.109539	0.151342	-0.257442	-0.672955	-0.330078
Gh_A12G0426	3.54429	3.07779	4.98924	4.24812	4.04433	4.16611	2.48899	2.61941	2.30858	2.30983	4.13051	4.10358	7.02313	6.30153	4.88998	5.32576	0.494155	0.445531	2.11177	1.84823	5.2118	4.96967	10.5403	10.4498		0.999007	0.696607	-0.161221	-0.5163	2.03922	0.310165	-1.22052	-2.81538
Gh_A12G0940	3.08373	3.16895	2.69802	2.64487	1.19506	1.40691	1.27779	1.623	3.14412	3.27088	1.78408	1.73506	1.04856	1.03447	1.17508	1.07604	0.804722	0.731391	0.843105	1.06799	2.54458	3.06316	1.15126	0.954684		-0.356912	-0.316156	-0.602466	0.0368269	-0.458002	1.10642	-1.49321	-2.0267
Gh_A12G0941	2.44366	2.42255	0.525009	0.469096	0.602902	0.621055	0.573429	0.560696	1.58053	1.37733	0.109466	0.179044	0.573073	0.610603	0.496316	0.488571	0.677721	0.63096	0.151108	0.165313	0.475304	0.592676	0.808977	0.812755		-0.203503	-0.0488455	-1.82571	-0.721644	0.516043	-0.205275	-1.65072	-1.89559
Gh_A12G0962	7.69218	7.39465	2.34123	1.91962	1.6606	1.25676	1.48651	1.44979	5.45668	5.08961	1.55061	1.59686	3.12218	2.43954	2.88051	2.91109	1.90146	2.35201	1.26843	1.30093	2.3018	2.48751	2.74239	2.8782		0.980055	0.933875	-0.430007	-0.517148	0.936414	0.728026	-0.72275	-1.83444
Gh_A12G1056	2.17388	2.71836	1.80008	2.70207	1.24029	1.82519	0.138783	0.16478	1.88794	1.72471	2.02675	1.71887	0.725492	0	0.127628	0.143584	0.969882	0.54653	1.24344	0.680161	2.40688	1.4631	2.04828	1.672		-0.159766	-2.09904	-0.240749	-0.429921	3.61324	0.318734	-1.26192	-1.73938
Gh_A12G1292	1.30759	1.32129	0.314982	0.168862	0.542572	0.638752	0.78925	0.720841	1.10119	1.40118	0.492562	0.429674	0.476056	0.507233	0.39082	0.251247	0.530351	0.358624	0.181316	0.396721	0.263226	0.284463	0.896031	0.85333		-1.26728	-0.260645	0.996217	-0.0815758	0.213244	-1.10526	0.217758	-1.59165
Gh_A12G1937	0	0.179916	0	0	0.369401	0.326163	0.0413345	0.0490773	0	0.0733826	0	0	0.0540192	0.0575569	0.0760239	0.128293	0.0361081	0.0406939	0	0	0	0	0	0		1.13271	-2.63809	Na	-0.646907	1.91626	-1.02986	Na	-2.18979
Gh_A12G2553	1.76904	1.63062	0.571651	0.858096	1.18164	0.985363	2.18163	1.98851	1.59881	1.40841	1.28727	1.20869	1.15197	0.951246	0.993002	0.980356	0.51976	0.564075	0.75685	0.647997	1.38539	1.29066	1.54487	1.90267		-1.07792	-0.0437621	0.832671	-0.178661	-0.280792	0.309442	-0.000139578	-1.64926
Gh_A12G2681	3.89512	4.32953	13.6051	11.0663	8.28323	9.03804	11.1223	10.1996	1.84516	1.76589	4.54854	5.03974	6.73598	6.42162	7.94147	8.04558	8.41263	7.87862	5.13109	4.21006	11.7127	10.4862	14.3466	14.3438		-0.414111	-0.395689	-1.35771	-1.18587	0.429584	0.357109	-1.40054	0.987311
Gh_A12G2708	0.426419	0.526641	0.564955	0.605746	0.648775	0.700133	0.338777	0.287313	0.292608	0.343682	0.667507	0.727852	0.316244	0.336955	0.244786	0.350497	0.126832	0.0714702	0.469749	0.513906	0.31475	0.226763	0.223212	0.194354		-0.091018	-1.04588	0.25279	-0.579524	-0.582929	-1.33498	-0.251727	-2.31538
Gh_A13G0416	8.08518	7.92962	47.2584	52.0218	7.59779	9.58353	7.28709	7.78692	9.54588	9.91839	34.6845	30.0842	14.9199	13.5294	13.4027	12.314	0.848761	0.239139	10.1561	9.92035	20.7997	22.7624	11.6511	11.7056		0.770142	0.735527	-0.618195	0.281226	0.632563	1.35047	-2.30444	-4.15159
Gh_A13G0597	0.818786	0.606735	0.903994	0.775412	1.24574	0.733284	0.627269	0.579266	0.526733	0.742409	1.13092	1.10984	0.273255	0.29115	0.192283	0.144215	0.852377	1.02925	1.04075	0.569292	0.831001	0.734766	0.77148	0.839673		-1.85593	-1.76065	0.420214	-0.172633	0.417073	-0.290584	-0.121278	0.41023
Gh_A13G0791	2.06058	2.53578	1.17001	0.731783	0.755773	0.593164	0.413443	0.624769	2.49968	2.60236	0.365927	0.465509	0.34384	0.418695	0.449339	0.583288	1.60883	1.36912	0.561253	0.736814	0.325919	0.308188	0.901421	1.20751		0.0105007	-0.819373	-1.16475	0.158042	1.03758	-1.07903	-0.524957	-0.62311
Gh_A13G0806	0	0	0	0	0	0	0	0	0	0	0	0	0	0	0	0	0	0	0	0	0	0	0	0		Na	Na	Na	Na	Na	Na	Na	Na
Gh_A13G1684	50.6478	47.4386	46.6118	44.4429	28.8294	25.0584	22.1591	21.9071	26.6582	25.8519	22.9434	19.3633	25.6891	23.5092	20.7938	20.6487	8.03263	6.55956	23.9054	22.5572	31.2734	29.3822	25.9743	24.2749		-0.0885467	-0.129227	-1.11062	-0.900856	0.188626	0.173522	-0.970862	-2.75547
Gh_D01G0335	0.706929	0.642904	0.936597	0.912929	0.66	0.517998	0.722101	0.662511	0.496118	0.233086	0.532593	0.580742	0.428955	0.411342	0.301844	0.407498	0.630798	0.484712	1.02927	1.07241	0.675969	0.692059	1.21106	1.1204		-0.979774	-0.477124	-0.7335	-0.987311	0.751998	0.22622	0.184202	-0.285931
Gh_D01G1371	0	0	0	0	0	0	0	0	0	0	0.0725717	0.0791325	0.0584498	0.0622777	0.0411297	0.0462718	0	0	0	0	0	0	0	0		-1.96231	-1.49451	-1.16562	Na	Na	Na	Na	Na
Gh_D01G1459	0	0	0	0	0	0	0	0	0	0	0	0	0.345823	0.36847	0	0	0	0	0	0	0	0	0	0		Na	1.07026	Na	Na	Na	Na	Na	Na
Gh_D01G1490	13.8282	14.137	5.76762	6.54783	3.89608	4.01339	3.22607	3.72686	15.6171	15.9437	6.22508	6.47931	4.44398	4.79572	2.68611	2.79642	10.1682	10.4295	7.22605	8.11897	4.30013	4.49386	3.13667	3.32639		-0.339319	0.223378	0.0474698	0.174512	-0.102274	0.152745	0.317755	-0.441178
Gh_D01G1617	3.24726	3.39067	1.30371	1.67741	0.785995	1.05752	1.75899	1.96915	2.05101	1.78446	0.652388	0.533524	1.70767	1.67955	1.6176	1.87183	0.878047	1.08852	0.375233	0.65681	0.817117	0.824174	2.96693	3.43101		-0.097008	0.893413	-1.32572	-0.794486	0.777642	-0.151821	-1.57473	-1.76303
Gh_D01G1620	1.58649	1.4428	1.71974	1.22927	0.822871	0.968739	3.24107	2.27393	0.890708	0.653862	1.43429	1.82462	0.866392	0.512851	2.09993	2.21005	0.386082	0.362596	0.439979	0.481338	1.43716	1.20798	1.49483	1.18324		-0.333619	-0.421607	0.15397	-0.987314	-1.02947	0.56145	-1.65968	-2.01565
Gh_D01G2203	1.97502	1.61758	0.964034	0.295326	0.59307	0.418921	0.637076	0.882483	0.401226	0.659764	0.947595	0.751463	0.346909	0.221777	0.537045	0.494335	0.231885	0.261335	0.317107	0.346916	1.09336	0.870629	0.979426	0.959401		-0.541251	-0.845607	0.66129	-1.7966	0.370518	0.968937	-0.685918	-2.86013
Gh_D02G0445	7.74569	8.03301	2.84041	3.04549	1.42047	1.44002	2.54312	2.76788	5.76591	5.92579	3.6967	3.74967	2.86195	2.82805	1.75403	1.75406	1.91301	1.96472	2.45258	2.53887	2.4694	2.50314	3.32328	3.40427		-0.597005	0.992174	0.340114	-0.432389	0.342286	0.797721	-0.237143	-2.02458
Gh_D02G0721	58.0967	62.8847	47.6488	50.8927	32.9888	35.1202	20.9115	21.6412	67.7006	69.4839	57.8903	58.2488	39.1468	38.5625	25.9873	26.6051	35.8561	35.4717	53.6967	52.9737	47.8599	45.0182	33.8867	34.1868		0.305716	0.190908	0.237826	0.182341	0.678041	0.447524	0.115106	-0.761139
Gh_D02G0920	0.317828	0.353274	0	0	0	0	0.405811	0.385463	0.245354	0.28818	0.131696	0.143602	0.212139	0.226031	0.149277	0.16794	0.2127	0.239713	0.242393	0.132589	0.175947	0.190142	0.598929	0.488903		-1.32073	0.365231	-0.305891	-0.333599	0.452266	0.105574	0.0766198	-0.569453
Gh_D02G1346	0.797694	0.886658	1.47959	1.58642	0.728189	1.28591	1.14074	1.06419	0.738957	0.578627	0.9255	1.00917	0.851891	0.794221	1.4237	1.2645	0.213536	0.160437	0.851711	0.665552	1.85471	1.24079	0.150321	0.327217		0.284243	-0.234411	-0.664749	-0.363045	-2.31264	0.648639	-1.02496	-2.18386
Gh_D02G1888	0.0839728	0.0933381	0	0.0596434	0.0479101	0.056403	0.0428875	0.0509213	0.0648247	0.0380699	0	0	0.0840733	0.0895792	0.0591602	0.0665566	0.168592	0.232226	0	0	0.185947	0.200949	0.118682	0.17223		0.425191	0.739355	0.75555	-0.833597	1.61323	1.89474	0.75555	1.16027
Gh_D02G2435	6.2516	6.21736	3.92334	4.20662	1.50181	1.76803	3.19288	3.39193	3.55604	4.17674	2.18142	1.78397	1.97655	2.10599	3.39985	3.65105	2.64237	3.30885	1.25469	0.823578	1.45719	2.1653	1.55011	2.6994		0.0984089	0.324319	-1.04219	-0.693939	-0.685978	0.124455	-1.99872	-1.07618
Gh_D03G0109	26.9162	27.9582	26.2474	25.4167	22.7246	22.9211	51.1471	51.7966	12.6513	12.1792	22.2203	20.8079	24.5772	23.0517	39.3386	38.8309	9.64867	9.20515	17.9173	17.3082	41.5724	39.5279	61.8635	58.7159		-0.39718	0.0606313	-0.264471	-1.14402	0.227665	0.828783	-0.552571	-1.54142
Gh_D03G0119	0	0	0	0	0	0	0	0	0	0.128939	0	0	0	0	0	0	0	0	0	0	0	0	0	0		Na	Na	Na	-0.199423	Na	Na	Na	Na
Gh_D03G0374	47.3574	46.7079	53.2431	58.5087	18.2667	22.8488	16.9479	18.7069	54.5805	52.3141	50.44	50.3287	18.9211	18.3814	21.5378	22.9089	17.8552	19.2844	35.1	33.8082	32.6786	33.9185	31.8948	32.32		0.319051	-0.131546	-0.147648	0.184164	0.850536	0.704542	-0.696201	-1.34174
Gh_D03G0466	0	0	0	0	0	0	0	0	0	0	0	0	0	0	0	0	0	0	0	0	0	0	0	0		Na	Na	Na	Na	Na	Na	Na	Na
Gh_D03G1443	41.4603	45.6634	104.843	108.917	52.9264	56.4592	97.9466	105.962	26.1603	29.01	79.2304	83.827	51.682	52.1046	72.0233	74.9258	39.7826	39.8852	33.93	35.382	96.6293	99.5553	90.6162	93.19		-0.471772	-0.0750618	-0.390923	-0.65942	-0.148763	0.843381	-1.62487	-0.127389
Gh_D03G1568	2.51705	0.763027	1.51581	1.30021	0.522212	0.614783	0.818067	0.277517	2.47302	3.31964	0.758527	0.41355	0.610924	0.650932	0.429891	0.846366	0.61254	0.460223	0.69805	0.381834	1.39342	1.77963	2.15602	2.81592		0.340229	0.154393	-1.32571	1.04788	2.37052	1.47468	-1.44321	-1.38413
Gh_D04G0626	38.0673	43.3707	37.826	36.5014	38.0083	40.9106	15.0677	17.3131	43.3457	47.46	22.8719	26.6596	46.3706	41.9625	39.3346	40.2294	25.0512	28.2328	12.3387	15.8806	28.4496	27.8982	39.4547	34.1586		1.30036	0.161761	-0.589549	0.158664	1.18456	-0.485104	-1.40844	-0.611511
Gh_D04G0679	6.49494	6.09907	7.26976	8.59003	12.7781	12.3354	14.5841	16.3653	11.2381	12.9966	8.16662	9.00611	8.81978	8.91954	8.04709	8.34311	5.6456	6.02477	4.69719	4.67158	11.4066	12.0589	9.91812	9.41675		-0.91492	-0.501311	0.118036	0.941242	-0.676798	-0.0982553	-0.754431	-0.109936
Gh_D04G0742	0.0932027	0.103597	0.123482	0.132398	0.212704	0.25041	0.095203	0.0565183	0.0719499	0.0845086	0.0772397	0	0.248838	0.331418	0.0437752	0.0984962	0.0831654	0.0937277	0	0	0.103193	0.0557591	0.263453	0.0955803		-0.159772	0.31536	-0.158116	-0.333596	1.11323	-1.60526	0.410944	-0.154412
Gh_D04G1103	1.30601	1.88717	1.29773	1.39143	1.78833	1.579	2.73479	2.6531	1.05862	1.12498	1.51526	1.71126	1.35116	1.06813	1.4415	1.51821	0.407878	0.45968	0.448217	0.49035	2.169	2.03146	2.46111	2.20989		-0.864583	-0.484169	0.261033	-0.524653	-0.207913	0.320961	-1.5192	-1.85824
Gh_D04G1244	23.1044	21.0815	14.1631	12.0016	13.5755	13.6658	14.7061	15.8926	21.696	23.6069	12.4314	12.4646	13.9253	14.4693	11.7424	11.3884	7.84647	7.88933	11.4403	9.63852	11.2632	11.7593	12.3469	13.2614		-0.402739	0.0595641	-0.0667692	0.0362463	-0.256694	-0.243078	-0.312178	-1.48803
Gh_D04G1498	3.5123	2.60268	0	0	0.667973	0	0.298973	0.354978	1.3557	1.59233	0	0	0.390723	0	0.824825	0.927947	0.783513	0.588681	0	0	0.648127	0.35021	0	0		1.42519	-0.386822	Na	-1.04112	-0.938338	0.499586	Na	-2.15441
Gh_D04G1504	12.558	13.1831	7.39462	7.92853	11.9415	10.3094	9.26434	9.94209	11.0409	10.4377	4.04725	4.09791	8.38204	7.93864	8.02814	6.267	3.42394	4.73579	1.06416	2.32839	7.33825	9.39116	19.3921	17.5289		-0.436198	-0.443804	-0.91085	-0.261317	0.941912	-0.418531	-2.28224	-1.67595
Gh_D04G1736	3.21497	3.0772	0.946545	1.01489	0.203809	0.719812	0.820992	1.1914	1.24093	1.78143	1.25816	1.2105	0.238431	0.381068	0.503333	0.283131	0.0796873	0.0898078	0.408652	0.372555	1.68091	1.60281	0.420725	0.641081		-1.38949	-0.345609	0.332426	-1.08098	-0.929285	2.09943	-1.3288	-5.21647
Gh_D05G0041	13.1189	13.8118	3.18242	3.4122	6.16711	6.39158	9.55487	10.0842	8.98628	8.79568	1.95236	1.83666	5.58064	5.94611	7.85391	8.12799	4.59586	4.5292	1.76147	2.08122	4.39841	4.28348	16.8004	17.0064		-0.296976	-0.124195	-0.799261	-0.598443	0.784084	-0.532501	-0.783309	-1.56091
Gh_D05G0485	0.981665	1.09115	2.22958	2.39056	0.48007	0.753561	0.57299	0.850406	1.19086	0.762938	0.697315	1.01381	0.561623	0.79787	0.3952	0.741014	0.437974	0.987195	0.962578	0.351021	0.698711	0.587288	0.792813	0.862892		-0.367289	0.154393	-1.45723	-0.118755	0.244749	0.0908975	-1.98976	-0.654414
Gh_D05G0534	14.3015	12.7889	5.41364	4.12427	6.01234	5.48916	5.38205	5.1513	11.2894	11.6999	5.79235	4.95563	7.89496	8.02963	5.90901	5.05686	3.21432	2.27085	4.59246	4.93444	6.19088	5.33943	9.32119	7.82938		0.054033	0.470877	0.18124	-0.234797	0.69816	0.00115912	0.0107079	-2.32358
Gh_D05G0537	10.4969	9.27015	3.71492	4.08528	2.70733	2.70433	3.74542	3.92384	6.93777	6.64938	3.93246	3.70325	1.96753	1.99412	2.56639	2.54533	3.84923	3.75968	3.12544	3.35925	3.18411	3.35499	4.47102	3.98146		-0.5849	-0.450002	-0.029771	-0.538396	0.138254	0.272528	-0.265784	-1.37465
Gh_D05G0899	15.1787	16.1096	10.2496	8.76387	6.14586	6.84067	3.90111	3.56298	18.8236	18.9127	8.4401	7.87574	5.03293	5.08396	3.95549	3.98432	7.64583	7.82904	7.31907	8.57901	5.58379	5.44844	3.8753	3.91657		0.0906104	-0.358201	-0.217194	0.270965	0.0634648	-0.233332	-0.258296	-1.01516
Gh_D05G1106	2.26813	2.52108	5.50916	5.90694	2.15677	2.28519	2.75121	2.69349	1.53206	1.6281	3.83764	4.18458	3.40626	3.62933	4.08361	3.99491	0.716786	0.855339	2.16225	2.12895	4.02844	3.56192	4.80844	4.74889		0.569233	0.663353	-0.509471	-0.598442	0.811808	0.770845	-1.41078	-1.61068
Gh_D05G1339	56.7171	57.7241	34.0155	33.2388	26.7665	27.8272	14.4538	15.1444	57.0723	58.0399	50.3397	52.3596	40.6219	40.2943	16.4711	16.9887	17.2862	17.0464	42.8995	40.5544	45.2559	44.9276	24.0261	22.4996		0.17714	0.567955	0.610545	0.0084391	0.652134	0.724392	0.310879	-1.73693
Gh_D05G1456	0.732419	0.763222	0.181944	0.130054	0.104469	0.061494	0.116897	0.111035	0.212028	0.290543	0.265552	0.289559	0.15277	0.162775	0.129	0.145128	0.428888	0.391289	0.209469	0.267352	0.0506827	0.219087	0.345051	0.328608		0.264222	0.976324	0.850123	-1.59088	1.56346	0.394738	0.621436	-0.867968
Gh_D05G1682	0.31311	0.261023	0.207417	0.222393	0.267964	0.315465	0.199894	0.237338	0.120856	0.212927	0	0	0.20899	0.167007	0.0735304	0	0.0349238	0.0393592	0.119397	0.130621	0.216669	0.28098	0.14751	0.0802744		-0.962115	-0.638088	-0.337288	-0.833599	-1.00118	-0.236779	-0.782246	-2.9469
Gh_D05G1785	25.4185	27.8554	19.8027	19.4526	20.6301	21.0408	27.4725	28.1682	15.4077	15.8248	16.4663	16.8227	15.7114	15.9129	17.3192	17.0253	8.2259	8.32555	14.5392	14.7857	22.0982	22.8102	24.3716	23.038		-0.696002	-0.397966	-0.237867	-0.768999	-0.23142	0.107834	-0.420755	-1.68499
Gh_D05G2004	28.7086	29.5755	35.4843	35.2282	64.9187	64.4336	29.5036	28.9442	13.6037	14.0206	46.6645	45.4521	70.6111	70.5047	32.9147	32.9908	7.8621	7.1589	33.1537	30.8662	55.0113	53.0963	55.2545	53.9153		0.173315	0.125584	0.38138	-1.07717	0.901311	-0.259054	-0.144357	-1.95754
Gh_D05G2012	17.6105	17.1278	20.707	20.0132	9.79638	9.46294	5.28412	5.33954	21.072	22.7541	19.1551	15.5159	10.1382	11.1152	6.10007	6.0485	6.38382	6.19841	7.21904	6.97931	8.40856	9.35036	10.3707	8.5784		0.193512	0.140827	-0.239797	0.334339	0.828386	-0.118828	-1.52002	-1.46516
Gh_D05G2641	6.39746	7.506	4.47338	3.02928	7.30005	7.87793	5.35487	5.49587	8.91703	8.86218	7.95264	6.4234	8.42154	7.96201	5.67563	5.82181	3.72638	3.66352	4.33694	4.15154	7.18155	7.22939	6.19528	6.19618		0.0835244	0.110747	0.957215	0.359341	0.191675	-0.0737769	0.204992	-0.907269
Gh_D05G3021	0	0	0	0	0	0	0	0	0	0.0957235	0	0	0	0	0	0	0	0	0	0	0.0584434	0	0	0		Na	Na	Na	-0.414295	Na	-0.770211	Na	Na
Gh_D05G3245	0.974564	1.08325	0.258236	0.276882	0.333618	0.130919	0.447966	0.413684	0.300935	0.353462	0.32306	0.440332	0.130097	0.138617	0.183092	0.154487	0.391325	0.343019	0.0743256	0	0.377658	0.29152	0.367303	0.299828		-1.35593	-0.63809	0.496216	-1.65552	-0.375406	0.666902	-1.25025	-1.4877
Gh_D05G3565	10.1869	10.5246	9.51672	9.18347	7.0788	7.28097	7.43729	7.08813	6.80539	7.46038	8.38806	8.6743	8.97869	8.59145	5.02992	5.21022	4.22445	4.76097	7.07187	5.93869	6.39854	5.58652	8.36779	8.16991		-0.504151	0.290886	-0.13221	-0.539205	0.187492	-0.263971	-0.528634	-1.20716
Gh_D05G3705	1.56871	1.74366	1.30859	1.32054	0.994459	0.780496	1.0089	1.02173	1.70437	1.73846	0.722239	0.840035	0.930715	0.909028	1.52815	1.5964	0.492511	0.438206	0.664656	0.533232	0.836259	0.695176	0.930637	0.893735		0.621406	0.0621805	-0.755036	0.0576755	-0.154794	-0.208488	-1.14281	-1.83189
Gh_D06G0667	2.87675	2.39819	0.238209	0.638522	1.33356	1.20766	2.24978	2.18058	3.60875	3.66807	0.596011	0.568656	0.540036	0.639336	0.591126	0.712532	0.441194	0.452024	0.205684	0.150013	0.398136	0.376476	0.254113	0.829726		-1.77097	-1.11086	0.577965	0.470067	-2.27012	-1.71277	-1.15072	-2.55621
Gh_D06G1447	0.792624	0.755162	0.300037	0.160851	0.129207	0.152112	0.289155	0.274656	0.524471	0.513348	0.375354	0.306966	0.226735	0.322111	0.159547	0.119663	0.202075	0.227739	0.172714	0.0944746	0.376106	0.40645	0.640139	0.580602		-1.02826	0.946873	0.627733	-0.576311	1.11323	1.4797	-0.782241	-1.85058
Gh_D06G1720	2.57569	2.49353	1.54112	1.65239	1.32733	1.451	1.52766	2.01536	2.18078	2.33542	0.963988	1.2013	1.38643	1.35905	1.05365	1.14147	0.778457	0.751992	1.20396	1.10917	1.93184	1.73975	2.66173	2.55619		-0.678036	-0.0158007	-0.568425	-0.167311	0.571999	0.401641	-0.465633	-1.72784
Gh_D06G1932	0	0	0.255171	0.273596	0	0	0.0983666	0	0	0	0	0	0	0.0684861	0.0452299	0.0508846	0.128894	0.145263	0	0.0803473	0.0533108	0.057612	0	0		-1.43056	-0.655826	-0.636221	Na	0.394647	-1.61706	-1.17683	-0.313109
Gh_D06G2295	22.9321	33.7362	15.6379	20.5995	15.7774	22.6515	10.6787	12.679	14.5789	14.0658	11.1791	11.885	23.6348	25.9021	16.7896	15.1466	4.66423	4.57833	8.23023	8.72252	16.0554	14.3245	26.3734	27.6671		0.454692	0.388258	-0.638855	-0.957796	1.21504	-0.317961	-1.08292	-2.58953
Gh_D06G2319	3.44233	3.74972	1.00335	1.07579	0.314239	0.369944	0.84389	0.918472	9.83231	9.1764	0.855827	0.497705	1.14882	0.587544	0.711385	0.618433	1.84297	1.4193	1.62769	1.83814	0.64792	0.535443	1.23251	1.05904		-0.408521	1.2688	-0.670734	1.40265	0.375961	0.78869	0.735426	-1.15148
Gh_D07G0019	0.157068	0.349171	0.832386	0.669365	0.537685	0.632998	0	0	0.363757	0.142417	0.390501	0	0.314512	0.223406	0.147543	0.0829945	0.0700765	0	0	0	0.347807	0.187934	0.44398	0.483225		-0.619423	-1.13809	-1.53459	-0.0411133	1.44606	-1.19022	-2.13449	-1.10139
Gh_D07G0108	3.35813	2.3329	3.33684	3.27962	2.15545	1.69169	1.50071	1.14546	1.62024	1.71274	2.95691	3.79321	3.08197	3.13454	2.76016	2.10713	2.62192	1.68852	1.76075	1.92626	2.90474	2.13458	3.16411	2.79808		0.879229	0.702826	0.0177492	-0.748634	1.18233	0.382953	-0.845009	-0.4117
Gh_D07G0219	0.360916	0.451314	0.597713	0.384522	0.720713	0.666656	0.806447	0.875441	0.139308	0.163625	0.448652	0.285373	0.692583	0.609602	0.529731	0.548283	0.20128	0.226843	0.412881	0.489334	0.624375	0.620771	1.40276	1.29543		-0.640704	-0.0932564	-0.422037	-1.41856	0.681983	-0.154947	-0.0929868	-0.917448
Gh_D07G0527	2.72372	3.02749	2.64631	3.09533	0.8288	1.21965	1.08196	1.06441	1.49521	1.64643	2.05658	1.53147	0.646395	0.688727	0.852847	0.92749	0.891146	0.882587	1.52332	1.51502	1.50783	1.91917	1.08357	1.11728		-0.270969	-0.591536	-0.689456	-0.872006	0.036041	0.758697	-0.91376	-1.69508
Gh_D07G0750	0	0	0	0	0	0	0	0	0	0	0.31674	0.518061	0.255105	0.271811	0	0	0.0852599	0	0	0	0.105791	0.114327	0.360117	0.391949		Na	0.631313	1.25268	Na	1.14403	-0.628343	Na	-0.497798
Gh_D07G1002	29.9393	31.8209	32.862	34.3034	20.5728	23.0454	19.867	21.3357	18.6417	19.4187	26.0793	26.1659	13.7842	13.9098	15.2422	14.7229	2.19375	2.19766	16.4167	17.7775	28.3696	28.7628	21.9293	22.9713		-0.458755	-0.65305	-0.362089	-0.698018	0.124524	0.391666	-0.974778	-3.81325
Gh_D07G1810	7.13049	7.73997	4.3545	3.87757	2.98762	3.29272	3.64176	3.71589	4.77347	5.7582	3.41628	3.62445	3.08614	3.1694	2.40712	2.47258	3.5044	3.7814	3.27136	2.74225	2.96054	3.1994	3.6217	3.42768		-0.592509	-0.00413162	-0.223736	-0.502836	-0.0622221	-0.0273074	-0.456205	-1.02912
Gh_D07G1999	17.4631	18.0041	20.7893	24.4475	18.1941	20.0594	27.4031	28.0856	17.9747	19.5058	11.7455	12.8074	9.79779	9.3595	26.8646	29.2872	5.75873	6.49011	5.40453	4.85676	29.5627	26.9513	25.2774	24.1377		0.0159034	-0.996359	-0.878221	0.0786178	-0.167517	0.563192	-2.13761	-1.53625
Gh_D08G0161	0.239145	0.265816	0	0	0.272885	0.321258	0.122139	0.145018	0.27692	0.216837	0.396373	0.432206	0.239431	0.170074	0.449284	0.442273	0.213391	0.480984	0	0.0997648	0.264778	0.214605	0.675984	0.613114		1.7439	-0.553126	1.28375	-0.0411167	2.27419	-0.312779	-0.384466	0.345587
Gh_D08G0742	0.388966	0.864693	0.515334	0.552542	0	0	0	0	0	0	0.322347	0.351489	0.519242	0	0.365377	0.411058	0.173539	0.195579	0	0	0.215329	0.465403	0	0		1.18883	0.805436	-0.664749	-1.77038	Na	0.896977	-1.65026	-1.65441
Gh_D08G1342	4.30276	4.47407	1.10335	1.18301	0.475143	0.55937	0.283555	0.336671	5.89318	5.1599	0.345079	0.501701	0.555859	0.394841	0.325953	0.293364	1.05273	0.767692	1.37612	1.04225	0.153676	0.166074	0.392338	0.284679		0.00119387	-0.138087	-1.45723	0.32977	0.113233	-1.69022	0.0679774	-2.28706
Gh_D08G1682	1.60359	1.45835	0.772568	0.82835	0.332697	0.587509	0.372274	0.618812	2.36331	3.30455	0.604063	0.658673	0.875731	0.829406	0.61623	0.616242	0.520325	0.513107	0.667082	0.486526	0.403515	0.436071	0.412074	0.298999		0.36055	0.946873	-0.34282	0.86981	-0.451411	-0.0758172	-0.489761	-1.56541
Gh_D08G1728	8.71091	9.08261	3.47249	4.05173	8.44451	7.97386	5.78754	6.21723	4.70125	4.82288	0.511078	0.487621	10.0848	9.48436	6.15508	6.35434	1.78843	2.24813	2.11649	1.92953	7.80955	7.65562	13.292	11.8581		0.0601488	0.253185	-2.90953	-0.901496	1.06553	-0.0857667	-0.892293	-2.14926
Gh_D08G2109	3.79221	4.21515	2.02365	2.02012	1.44241	1.20282	0.9684	1.11786	1.87034	2.10129	1.83325	1.61822	1.68744	1.79795	1.1132	1.11322	1.9504	2.17162	0.923881	0.922838	1.19546	1.44946	1.6873	2.0525		0.0975185	0.403144	-0.231295	-1.01202	0.838842	-0.000910343	-1.13074	-0.958041
Gh_D08G2213	1.73119	3.84853	1.52908	0.819742	1.31696	2.32562	5.30503	4.89905	0	0.523234	4.30406	5.21462	0	0	4.87861	4.26887	0.772377	0.290157	1.3203	0.962941	1.27783	0.690464	1.08745	2.36714		-0.159769	-3.36381	2.08118	-3.11347	-1.66788	-0.897746	0.0102397	-2.44689
Gh_D08G2570	2.42686	4.04629	4.28707	2.29831	4.61543	3.80352	3.71842	3.92441	5.30817	5.86795	8.71525	10.2341	3.23969	2.30124	3.98945	4.2745	3.78964	4.06756	4.01019	3.71221	6.26963	6.29151	8.38438	7.46632		0.11239	-0.617767	1.58914	0.83269	1.05047	0.583993	0.297692	0.325267
Gh_D09G1378	0.67248	0.747479	2.67287	3.82114	1.53471	0	0.343456	0	0	0	1.67191	1.21537	0	0	0.631697	0.355337	0.600059	0.338134	2.56435	1.68324	0.372279	0.402315	0	0.689635		0.97138	-1.58718	-1.16475	-2.06023	0.502854	-0.40036	-0.621279	-0.654412
Gh_D09G1436	16.3924	15.8946	12.4763	11.2714	16.0187	13.1188	10.5542	9.25302	8.27925	8.06412	9.53829	8.90354	13.3857	13.7662	9.2963	9.12244	3.73457	3.77044	6.45036	5.81997	13.5155	12.2586	15.1988	13.6809		-0.101797	-0.0947849	-0.363802	-0.982201	0.545154	-0.171492	-0.952661	-2.10487
Gh_D09G2000	0	0	0.151285	0.324417	0	0	0.0583193	0.0692438	0	0	0	0	0	0	0.0536315	0	0.101891	0.0574156	0	0	0	0	0	0		0.587443	Na	-0.382024	Na	1.41963	Na	-0.382024	-1.15226
Gh_D09G2081	1.53812	1.16568	0.277884	0.297948	0.638226	0.657442	0.14283	0.254377	1.24135	0.950889	0.2897	0.252712	0.279992	0.34805	0.0985116	0.110828	0.218348	0.281233	0.106641	0.116665	0.309632	0.167307	0.922249	1.00377		-0.86729	-1.05313	-0.0887447	-0.301541	2.33562	-1.50894	-1.3672	-2.4339
Gh_D09G2139	19.4939	20.0326	14.6191	13.0622	15.1092	12.8466	14.6524	13.1594	29.8135	31.3489	8.22997	8.30925	16.694	14.1251	19.3482	21.1841	10.8306	8.50725	5.61022	8.59263	15.6784	14.3029	21.4866	29.0438		0.543975	0.140388	-0.740752	0.629504	0.847218	0.104136	-0.992976	-1.04175
Gh_D10G0493	8.58653	7.54505	3.76642	3.37904	4.36936	4.28659	4.26688	3.6589	3.9861	4.20842	3.99068	3.14562	4.33713	4.24982	3.86941	3.61742	2.66611	2.36293	3.31853	2.85597	4.84979	3.78329	6.01316	5.47374		-0.0787584	-0.011555	-0.00991416	-0.974675	0.538029	-0.0148444	-0.212641	-1.68115
Gh_D10G0795	0	0.28308	0	0	0.871825	0.342124	0.130071	0.154437	0	0	0	0.230139	0.169988	0.18112	0	0.134571	0.113625	0.128056	0.194231	0.212489	0.422962	0.457087	0	0		0.0937923	-1.63809	0.218485	-0.367838	0.262376	-0.312781	0.257046	-0.862845
Gh_D10G0960	54.0693	55.8344	36.5109	38.6516	57.7172	56.7019	26.5459	28.9801	72.1698	73.0641	67.0686	63.0447	72.8772	74.1767	44.5644	43.869	26.1465	23.1528	48.9514	52.0977	48.278	49.8775	55.2182	55.8064		0.672771	0.362018	0.791579	0.402297	1.00101	-0.221322	0.426857	-1.15908
Gh_D10G1132	5.26254	6.20244	2.10369	1.74002	1.24241	1.40171	1.96946	2.31088	7.91493	7.73335	1.27829	1.18887	1.48375	1.38734	1.385	1.46227	0.951305	0.958067	1.03797	1.09769	1.48176	1.54703	1.75257	1.81444		-0.584073	0.12062	-0.63411	0.453537	-0.258623	0.198242	-0.841895	-2.58121
Gh_D10G1286	0.912518	1.21715	0.725386	1.55552	0.833009	1.22584	0.652471	0.332012	1.83154	1.98575	0.302492	0.329838	0.121815	0.519169	0.0857178	0.385738	0.895671	1.37649	0.417562	0.913627	1.11136	0.54592	1.03176	1.49727		-1.35593	-2.00657	-1.74971	0.855655	1.41707	-0.375543	-0.782239	0.0753015
Gh_D10G1657	15.508	16.4296	11.9853	12.1623	8.01848	8.78887	12.3757	10.3347	10.9118	10.9855	11.7809	12.1161	9.2189	8.78867	7.20789	7.72493	5.40543	5.32029	10.8417	11.3217	12.6988	13.3851	10.7307	9.93976		-0.599882	0.100617	-0.0151535	-0.54391	-0.13099	0.635085	-0.124	-1.57363
Gh_D10G2113	0.403052	0.537604	0.106799	0.229021	0.0919833	0.108289	0.0411702	0.0977646	0.311145	0.292364	0.200412	0.21853	0	0	0.0378609	0	0.323682	0.243193	0.122956	0.134514	0.178501	0.289354	0.151906	0.165334		0.338629	0.768369	0.420211	-0.626079	1.32075	1.18722	-0.28224	-0.730416
Gh_D10G2603	1.43519	1.19644	1.4261	1.52906	0.61413	0.481997	0.870435	0.761517	0.830948	0.813324	0.743367	0.972684	0.838199	0.956884	0.800468	0.900545	0.400198	0.586332	0.820919	0.673565	1.58902	1.55624	0.760654	0.827891		0.0605146	0.719034	-0.796265	-0.672629	-0.0369658	1.53124	-0.98976	-1.43571
Gh_D11G0288	1.62066	2.20172	1.90861	1.27901	1.43835	0.967616	1.37954	1.20117	4.58739	4.24518	0.895392	1.62723	1.08173	1.02451	1.52238	1.52241	0.883745	0.724351	0.68667	0.901461	0.598123	1.18503	1.01802	1.108		0.242029	-0.164323	-0.37227	1.22414	-0.277452	-0.486742	-0.989762	-1.23937
Gh_D11G0460	1.2849	1.3124	0.644127	0.591973	0.118879	0.233255	0.212834	0.210585	0.938289	1.16504	0.978494	1.03557	0.533117	0.765607	0.277278	0.183497	0.542275	0.733374	0.768056	0.869229	0.480614	0.519391	0.294485	0.178064		0.0914792	1.93983	0.70502	-0.31269	0.113229	1.58515	0.404036	-1.04207
Gh_D11G0934	0.462526	0.51411	1.22558	1.42358	0.351854	0.31067	0.433081	0.747938	0.297548	0.489278	0.766617	0.626941	0.30872	0.219292	0.325857	0.366597	0.206358	0.193805	0.293956	0.257271	0.298726	0.230591	0.145268	0.0790542		-0.719561	-0.345604	-0.930004	-0.353917	-2.40896	-0.3331	-2.26398	-1.28593
Gh_D11G1070	0.0715164	0.0794925	0	0	0	0	0	0	0	0	0.118535	0.193877	0.0477347	0.0508608	0	0	0	0	0	0	0.118773	0.0855703	0	0		Na	-1.78667	-0.165307	1.17292	Na	-0.75384	Na	1.17292
Gh_D11G1534	3.9141	4.00411	2.75347	3.0999	1.8972	1.86126	4.49344	4.78904	3.20875	3.04647	4.24842	4.22558	2.05765	2.1924	2.61926	2.83691	1.63811	1.67199	2.00768	1.73401	3.1064	2.79753	2.80676	3.30351		-0.767039	0.176679	0.536302	-0.340506	-0.607326	0.649623	-0.646916	-1.25828
Gh_D11G1566	0.843449	0.625011	0	0.399384	0	0	0	0	2.1704	2.03939	0	0	0	0	0	0	0.125436	0	0	0	0	0	0	0		Na	Na	-0.616121	1.53489	Na	Na	-0.616121	-2.31385
Gh_D11G2321	25.4063	23.2194	13.7633	12.8322	12.6271	11.8317	9.0542	9.31233	22.228	21.1934	8.14123	8.16297	8.89342	8.27128	7.58393	6.80181	36.4235	32.249	11.9702	10.8343	11.3768	10.4032	8.937	7.75842		-0.354433	-0.511094	-0.705055	-0.162262	-0.141088	-0.168029	-0.222771	0.496804
Gh_D11G2524	0.0855667	0.0475549	0.0566828	0	0	0	0.109254	0.0518879	0	0	0.0354558	0	0.0285564	0.0304265	0.0200944	0.0226066	0.0381759	0.0645365	0.0326289	0.0356961	0.0710536	0.102382	0.0403115	0.0438748		-1.82074	-2.52789	-0.338445	1.41414	-0.840214	-0.995064	-1.52423	-0.361933
Gh_D11G2930	0	0	0	0	0	0	0	0	0	0	0	0	0	0	0	0	0	0	0	0	0	0	0	0		Na	Na	Na	Na	Na	Na	Na	Na
Gh_D11G3137	0	0	0	0	0	0	0	0.977144	0	0	0	0	0	0	0	0	0	0	0	0	0	0	0	0		-1.26152	Na	Na	Na	-1.26152	Na	Na	Na
Gh_D11G3268	0.227539	0	0	0	0.259642	0.305668	2.32423	2.48364	1.93219	0.825256	0.565705	0.616846	0.455623	0.323641	0.10687	0	0.609105	0.343231	0	0.189846	0.881747	0.680634	0.428786	0.466687		-4.15584	0.446873	1.79695	2.68268	-2.42518	1.45938	0.0796474	1.21711
Gh_D11G3271	0	0	1.30908	0.842162	4.28442	3.18563	3.02785	3.71487	0	0	0.491309	0.535725	2.76993	3.2324	1.85631	2.08839	0	0	0.753562	0.329759	1.85977	1.8916	5.77214	5.67438		-0.768388	-0.304112	-1.03323	Na	0.770982	-0.977974	-1.07472	Na
Gh_D11G3463	23.6824	24.0928	15.954	16.8209	17.863	19.1423	11.7878	11.927	26.8809	27.4785	19.8757	19.5869	20.1608	20.4106	14.5637	15.1119	17.5055	17.7609	17.0666	17.8336	23.6653	24.374	17.8702	18.0091		0.323268	0.133566	0.268361	0.186234	0.597378	0.377189	0.0908003	-0.437952
Gh_D12G0510	63.4077	50.3424	39.0035	35.3859	20.6725	15.2106	13.879	12.3591	62.9344	55.4396	15.0137	6.1391	28.7188	22.547	26.5903	29.9147	21.2172	25.0505	20.7249	11.3366	33.8484	18.967	12.8023	18.5786		1.10664	0.521071	-1.9522	0.0641668	0.235784	0.514895	-1.27721	-1.29318
Gh_D12G1030	0.53832	0.664841	0.633964	0.764705	0.409512	0.241053	0.274936	0.362709	0.55409	0.596572	0.446121	0.486452	0.359309	0.297764	0.337116	0.347657	0.0533718	0.0902253	0.0912338	0.149715	0.827804	0.67989	0.732647	0.797409		0.116501	0.0580692	-0.579786	-0.0573284	1.27526	1.25567	-2.57472	-3.10786
Gh_D12G1031	5.01818	4.86439	1.46885	1.32624	2.53017	2.66514	3.15897	3.29072	5.27029	4.97334	1.0155	0.896388	2.0642	1.99189	2.43914	2.68243	2.34301	2.52322	0.84553	0.730272	1.87355	1.88507	4.72824	4.78715		-0.333972	-0.356862	-0.548822	0.0513371	0.561306	-0.466527	-0.828798	-1.0229
Gh_D12G1963	4.72315	5.5389	1.43523	1.66197	1.87892	1.45525	2.34587	1.97073	5.18488	5.73629	2.26234	1.95783	2.1981	2.21878	1.79097	1.71723	1.97192	1.96091	1.78454	1.55461	2.23089	2.5405	3.06211	2.79954		-0.294014	0.417426	0.446447	0.0925399	0.445431	0.525781	0.108964	-1.37911
Gh_D12G2702	4.9229	4.55995	1.08704	1.16553	2.80873	2.20441	0.419046	0.995086	4.43373	5.20763	1.35992	2.22429	3.28586	0.583508	1.54145	1.30063	1.46425	1.23766	0.625746	2.0537	0.454213	0.981719	3.09232	3.36566		1.13271	-0.845608	0.627738	0.0203107	2.32075	-1.89774	0.0102417	-1.81537
Gh_D12G2750	11.7165	11.7578	6.47315	6.53623	2.59813	2.67636	2.9072	2.7039	13.4757	13.0752	6.25045	5.82962	6.30062	6.10601	2.76263	2.6318	8.93097	9.13503	12.6981	12.7439	3.17744	3.29191	6.25726	5.83745		-0.05629	1.23399	-0.107782	0.177517	1.1081	0.294522	0.967674	-0.377895
Gh_D13G0464	8.14189	8.38774	6.31436	5.3598	8.61079	8.80336	3.34693	3.13094	16.7097	16.0252	8.5577	8.61355	6.62734	8.04995	4.85003	4.72188	6.20189	6.88969	7.8754	7.12452	7.03576	6.41538	7.29726	7.94229		0.56396	-0.253395	0.561508	0.985619	1.23374	-0.373979	0.364665	-0.338249
Gh_D13G0465	22.9126	22.9711	69.6413	61.2673	47.1639	53.714	16.7502	19.6154	62.081	63.5479	77.4426	89.3154	58.4745	62.304	60.349	63.8583	17.6389	20.7827	40.0883	38.2341	47.5037	54.2929	79.1589	76.02		1.77602	0.262076	0.348488	1.45302	2.09748	0.0129111	-0.73851	-0.260909
Gh_D13G0491	18.0012	13.2559	4.17366	4.79465	7.95961	9.67287	9.19378	6.95894	13.3753	10.2013	10.2562	8.33673	14.1178	9.60153	7.60929	7.60945	3.01174	2.60225	6.17792	6.75866	9.7162	8.48086	10.8128	6.69191		-0.0719858	0.408033	1.04758	-0.403202	0.0887803	0.0489805	0.53056	-2.46411
Gh_D13G1322	0	0	0	0	0	0	0	0	0	0	0	0	0	0	0	0	0	0	0	0	0	0	0	0.122262		Na	Na	Na	Na	-0.237779	Na	Na	Na
Gh_D13G2031	1.56683	2.06812	1.42716	1.94753	0.893943	0.789308	2.30066	2.43471	1.81432	1.86463	0.324619	0.353966	0.784352	0.696432	0.873887	0.776166	1.79131	2.11729	0.373422	0.735344	1.51792	1.34746	1.10723	0.8034		-1.52292	-0.184644	-2.29815	0.0310749	-1.32733	0.767712	-1.66971	0.113533
Gh_D13G2541	0.339078	0.376894	0.449237	0.240837	0.386916	0.227752	0.346355	0.411235	0.392638	0.614896	0	0	0.113161	0.120572	0.238886	0.179168	0.151281	0.170494	0	0	0.563132	0.811421	0.638974	0.347727		-0.86729	-1.34561	-0.952232	0.458883	0.320749	1.18722	-0.952232	-1.15441
Gh_Sca005023G04	33.0568	30.5103	30.9703	27.085	17.7826	15.9391	13.7176	12.278	13.8531	14.2908	14.7738	13.0156	16.824	15.8687	12.3931	11.3848	7.26887	6.55956	17.8728	15.662	16.4373	14.7264	13.5155	12.2888		-0.127729	-0.0431659	-1.06255	-1.17447	-0.0100724	-0.113829	-0.791673	-2.20138
Gh_Sca005145G01	1.09571	1.55007	0.791827	0.990499	0.68198	0.936685	0.763107	0.543633	1.69171	1.80636	0.908045	0.720098	0.465402	0.354201	0.561414	0.684237	0.577737	0.601026	0.911615	0.747982	0.716862	0.417146	0.656983	0.919358		-0.0554786	-0.977124	-0.131192	0.423684	0.270982	-0.547523	-0.100956	-1.14511
Gh_Sca005341G01	0.830934	0.923606	0.550444	0.295094	0.474084	0.558123	0.318288	0.50388	0.481094	0.565068	0	0.375436	0.693274	0.590941	0.195136	0.329298	0.648768	0.208904	0.158429	0	0.115	0.124278	0.587195	0.213033		-0.65977	0.315357	-0.673834	-0.748634	-0.179248	-2.10526	-1.2962	-1.25073
Gh_Sca091430G01	31.7555	35.2971	0	15.0367	24.1572	28.4394	59.4679	44.9321	8.17146	0	0	9.56527	28.2609	22.5838	74.5743	61.525	23.6131	21.2896	16.1457	26.4951	11.7197	44.3285	109.71	75.9864		0.389997	-0.0531243	-0.326305	-4.82811	0.820753	-0.201587	3.69335	-0.57841
Na:The denominator is 0 when you calculate the ratio

## Sheet: Sheet2
ID	leaf_12h_ck_1	leaf_12h_ck_2	leaf_6h_ck_1	leaf_6h_ck_2	leaf_3h_ck_1	leaf_3h_ck_2	leaf_1h_ck_1	leaf_1h_ck_2	leaf_12h_PEG_1	leaf_12h_PEG_2	leaf_6h_PEG_1	leaf_6h_PEG_2	leaf_3h_PEG_1	leaf_3h_PEG_2	leaf_1h_PEG_1	leaf_1h_PEG_2	leaf_12h_salt_1	leaf_12h_salt_2	leaf_6h_salt_1	leaf_6h_salt_2	leaf_3h_salt_1	leaf_3h_salt_2	leaf_1h_salt_1	leaf_1h_salt_2		logpeg_12h_1	logpeg_12h_2	logpeg_12h	logpeg_6h_1	logpeg_6h_2	logpeg_6h	logpeg_3h_1	logpeg_3h_2	logpeg3h	logpeg1h_1	logpeg1h_2	logpeg1h	logsalt12h_1	logsalt12h_2	logsalt12h	logsalt6h_1	logsalt6h_2	logsalt6h	logsalt3h_1	logsalt3h_2	logsalt3h	logsalt1h_1	logsalt1h_2	logsalt1h
Gh_A01G1385	7.26876	7.06949	12.6397	12.2616	16.0701	16.4777	12.0652	12.3969	3.50705	3.29536	5.64734	8.62103	19.1033	20.0313	26.2449	25.9254	1.01343	0.913712	3.11825	2.65329	16.3472	14.9482	14.1256	16.7719		-1.05145	-1.10117	-1.07631	-1.16232	-0.508215	-0.835267	0.249443	0.281741	0.265592	1.12119	1.06439	1.09279	-2.84246	-2.95179	-2.89713	-2.01915	-2.20829	-2.11372	0.0246646	-0.140543	-0.0579392	0.22746	0.436067	0.331764
Gh_A02G0839	0.0585192	0.0650457	0	0	0	0	0	0	0.0903504	0.0530605	0.0969931	0	0.0390595	0.0832349	0.0824555	0.0927643	0	0	0	0	0	0	0.0551382	0.060012		0.626621	-0.293815	0.166403	-0.809581	0	-0.40479	-2.12179	-1.03027	-1.57603	-1.04385	-0.873893	-0.95887	1.53855	1.38601	1.46228	0	0	0	0	0	0	-1.62441	-1.50221	-1.56331
Gh_A02G0947	14.5337	15.3078	7.53136	8.57464	2.07303	1.88943	3.20259	3.09176	11.5363	11.9558	6.65362	6.09008	1.79933	1.83381	3.44061	3.7469	3.45131	3.59496	1.74308	1.85804	2.46563	2.34902	2.1535	2.28375		-0.333221	-0.356556	-0.344889	-0.178771	-0.493615	-0.336193	-0.204281	-0.0431069	-0.123694	0.103425	0.277269	0.190347	-2.07419	-2.09022	-2.0822	-2.11127	-2.20629	-2.15878	0.250215	0.314108	0.282162	-0.572556	-0.437024	-0.50479
Gh_A03G0044	0.164634	0.182996	0.0727069	0.0779566	0.187862	0.221164	0.0840838	0.0998346	0.127093	0.199036	0.181916	0.148772	0.109888	0.156112	0.05155	0.057995	0.12242	0.220749	0.292971	0.412086	0.243041	0.229818	0.20683	0.225112		-0.373378	0.121217	-0.12608	1.32311	0.93236	1.12773	-0.773639	-0.502535	-0.638087	-0.705855	-0.783611	-0.744733	-0.427423	0.270595	-0.0784141	2.01059	2.4022	2.2064	0.371526	0.0553752	0.213451	1.29855	1.17303	1.23579
Gh_A03G0178	0.521408	0.515164	0.307024	0.329192	0.859403	0.856094	0.858075	0.94855	0.49196	0.420241	0.52813	0.523522	0.386691	0.535619	0.870734	0.857146	0.180933	0.291303	0.132552	0.0966744	0.898015	0.79717	0.600457	0.594122		-0.0838717	-0.293815	-0.188843	0.782542	0.669321	0.725931	-1.15215	-0.676562	-0.914358	0.0211283	-0.146183	-0.0625273	-1.52696	-0.822511	-1.17473	-1.21179	-1.76772	-1.48976	0.0634047	-0.102882	-0.0197385	-0.515043	-0.674965	-0.595004
Gh_A04G0029	1.74301	1.67908	1.61649	1.65067	1.25965	1.32684	1.33531	1.55021	1.92862	2.05454	1.05928	0.997541	0.853156	0.867709	1.20069	1.0745	0.64804	0.555061	1.01914	0.921037	1.06141	1.14704	1.58756	1.37039		0.145988	0.291144	0.218566	-0.609781	-0.726604	-0.668192	-0.562141	-0.612711	-0.587426	-0.153311	-0.528798	-0.341055	-1.42743	-1.59695	-1.51219	-0.665512	-0.841721	-0.753617	-0.247041	-0.210079	-0.22856	0.249636	-0.177877	0.0358796
Gh_A05G0169	3.27833	3.83083	1.78191	1.85086	1.00715	1.01631	1.65288	1.65666	3.56905	3.46795	1.60224	1.59517	0.925764	0.956501	0.848842	0.932758	1.36888	1.41593	1.66682	1.89364	1.65199	1.50868	1.50486	1.12065		0.122579	-0.143574	-0.0104974	-0.153334	-0.214486	-0.18391	-0.121562	-0.0875021	-0.104532	-0.961414	-0.828703	-0.895058	-1.25997	-1.43591	-1.34794	-0.0963262	0.0329663	-0.0316799	0.713926	0.569946	0.641936	-0.135353	-0.563942	-0.349647
Gh_A05G0776	0.0641647	0.0713208	0	0	0	0	0.0327709	0.0389096	0	0	0	0	0	0	0	0	0.0572546	0	0	0	0	0	0	0		1.40568	1.25314	1.32941	0	0	0	0	0	0	2.37505	2.12734	2.25119	-0.164388	1.25314	0.544376	0	0	0	0	0	0	2.37505	2.12734	2.25119
Gh_A05G1162	36.9945	39.0449	23.2697	22.4631	25.8343	26.6514	16.0035	16.4182	39.1443	39.4692	31.7706	31.7427	38.5966	38.1779	18.9102	19.2086	14.761	13.8484	30.6171	29.649	43.6731	41.4018	32.0531	32.7322		0.0814914	0.0155932	0.0485423	0.44924	0.498868	0.474054	0.579186	0.518526	0.548856	0.240777	0.226456	0.233617	-1.32552	-1.49541	-1.41047	0.395885	0.400426	0.398156	0.757457	0.635482	0.69647	1.00208	0.995415	0.998746
Gh_A05G1176	21.6984	22.3127	19.1396	18.9556	36.0803	37.0206	61.9587	60.8292	18.6764	17.991	19.5687	18.9786	43.836	42.7045	43.9259	44.0222	8.30894	8.22649	14.1148	14.5703	46.6672	45.9896	74.3992	72.2295		-0.216372	-0.31059	-0.263481	0.0319872	0.00174945	0.0168683	0.280905	0.20606	0.243482	-0.496235	-0.466533	-0.481384	-1.38485	-1.43952	-1.41218	-0.439352	-0.379594	-0.409473	0.371198	0.312979	0.342088	0.26398	0.247824	0.255902
Gh_A05G1581	1.50808	1.67627	1.99802	2.14228	0	0	1.54044	0	1.16419	1.3674	1.24979	0	5.03294	6.43505	0	0	0	0	0	0	1.66972	1.80443	2.84189	4.63965		-0.373386	-0.293819	-0.333603	-0.676885	-3.65554	-2.16621	4.88779	5.24234	5.06507	-3.17974	0	-1.58987	-3.14911	-3.30165	-3.22538	-3.55496	-3.65554	-3.60525	3.296	3.40794	3.35197	0.883508	4.77041	2.82696
Gh_A05G1582	0.762488	0.770478	1.46939	1.47702	1.97742	1.86236	0.566438	0.546442	0.267554	0.439958	1.60846	1.25277	1.89693	1.87327	1.13948	1.31857	0.123704	0.104561	1.90314	1.50369	1.45819	1.61731	1.17562	0.995195		-1.51088	-0.808388	-1.15964	0.130463	-0.237568	-0.0535525	-0.0599529	0.00842688	-0.025763	1.00839	1.27083	1.13961	-2.62382	-2.88141	-2.75262	0.373164	0.0258178	0.199491	-0.439441	-0.203536	-0.321488	1.05343	0.864911	0.959171
Gh_A05G1760	0.353508	0.523912	0	0	0	0	0.180548	0.285824	0.272899	0.106844	0.195308	0.42593	0.157303	0.0838022	0.22138	0.311322	0.052573	0.0592499	0.269605	0.196632	0.130466	0.0704962	0.333084	0.483368		-0.373376	-2.29382	-1.3336	0.200216	1.32508	0.762649	-0.111989	-1.02047	-0.566232	0.294142	0.12328	0.208711	-2.74935	-3.14444	-2.94689	0.665313	0.209963	0.437638	-0.381861	-1.26992	-0.825889	0.883504	0.757995	0.820749
Gh_A05G1761	0	0	0	0	0	0	0	0	0	0	0	0	0	0	0	0	0.0525964	0.0592763	0	0	0	0	0.0555387	0.060448		0	0	0	0	0	0	0	0	0	0	0	0	-1.6925	-1.52001	-1.60625	0	0	0	0	0	0	-1.61397	-1.49177	-1.55287
Gh_A05G1762	0	0	0	0	0	0	0	0	0	0	0.0496422	0	0	0	0	0	0.080176	0.0903585	0	0	0.033161	0.0358365	0	0		0	0	0	-1.7759	0	-0.887948	0	0	0	0	0	0	-1.08429	-0.911803	-0.998047	0	0	0	-2.35798	-2.24603	-2.302	0	0	0
Gh_A05G1808	7.17716	6.16156	4.56117	5.05628	8.32292	7.44671	4.35103	3.64456	6.12615	5.34369	5.31927	4.48194	6.85469	5.97567	4.35757	3.88489	2.68145	2.46454	3.60463	3.45662	5.84677	5.23632	4.89318	4.54779		-0.228432	-0.205459	-0.216946	0.221824	-0.173953	0.0239357	-0.279998	-0.317503	-0.298751	0.00216688	0.0921291	0.047148	-1.4204	-1.32198	-1.37119	-0.339553	-0.548714	-0.444134	-0.50945	-0.50805	-0.50875	0.169415	0.319421	0.244418
Gh_A05G3884	3.21442	3.45382	1.3486	1.21766	1.16151	0.647721	4.35052	3.67106	2.31602	2.13736	1.90912	1.98489	1.50186	1.48591	2.08848	2.00989	1.19511	1.07751	1.06232	1.29627	1.33461	1.57049	2.42297	2.63714		-0.472911	-0.692363	-0.582637	0.501445	0.704948	0.603196	0.370749	1.1979	0.784326	-1.05873	-0.86908	-0.963907	-1.42742	-1.68049	-1.55395	-0.344244	0.0902549	-0.126995	0.200417	1.27777	0.739093	-0.844411	-0.477223	-0.660817
Gh_A06G0020	0.524404	0.323827	0.385984	0.496624	0.332439	0.234821	0.0892764	0.106	0.179922	0.211327	0.144863	0.263265	0.738933	0.787325	0.0821002	0.184729	0.649902	0.49806	0.0444377	0.0486149	0.161281	0.244011	0.109801	0.0597535		-1.54331	-0.615746	-1.07953	-1.41385	-0.915638	-1.16475	1.15235	1.7454	1.44888	-0.120893	0.801346	0.340226	0.309543	0.621096	0.46532	-3.11868	-3.35268	-3.23568	-1.04351	0.0553848	-0.494064	0.29854	-0.826969	-0.264214
Gh_A06G0166	0	0	0.0776429	0.083249	0	0	0	0	0	0	0	0	0	0	0	0	0	0	0.0446944	0	0	0	0	0		0	0	0	1.13061	1.03003	1.08032	0	0	0	0	0	0	0	0	0	-0.79676	1.03003	0.116635	0	0	0	0	0	0
Gh_A06G0170	42.2557	43.7719	150.845	149.982	116.458	119.285	40.435	41.2475	38.0569	39.4848	175.725	173.42	90.5668	90.4877	46.6394	46.0202	13.0135	12.3645	84.9527	83.6838	91.4254	90.1996	60.3851	60.7273		-0.150988	-0.148708	-0.149848	0.220253	0.209481	0.214867	-0.362756	-0.398619	-0.380687	0.205945	0.157961	0.181953	-1.69914	-1.8238	-1.76147	-0.828335	-0.841769	-0.835052	-0.349143	-0.40322	-0.376181	0.578588	0.558039	0.568313
Gh_A06G1085	38.3107	39.3225	3.04847	3.43201	2.1661	2.31825	2.02715	2.19759	49.2913	48.7674	2.95563	2.755	2.2653	2.25002	1.78316	1.88451	11.2153	10.0944	2.58837	2.49572	1.43301	1.34214	1.7886	1.88771		0.363586	0.310562	0.337074	-0.0446197	-0.317001	-0.180811	0.0646023	-0.0430983	0.010752	-0.185017	-0.221733	-0.203375	-1.77228	-1.9618	-1.86704	-0.236041	-0.459598	-0.34782	-0.596051	-0.788501	-0.692276	-0.180622	-0.219285	-0.199954
Gh_A06G1331	0.161789	0.179833	0.500154	0.536266	0.246154	0.217342	0.110174	0.163516	0.333058	0.342294	0.0893863	0.146201	0.0359962	0.0383536	0.0759889	0.0569928	0.0962439	0.162701	0.123389	0.0899922	0.0895653	0.129055	0.101628	0.110611		1.04166	0.928578	0.985119	-2.48425	-1.875	-2.17962	-2.77364	-2.50253	-2.63809	-0.535923	-1.52058	-1.02825	-0.749347	-0.144435	-0.446891	-2.01916	-2.57508	-2.29712	-1.45855	-0.751981	-1.10527	-0.116486	-0.563937	-0.340211
Gh_A06G1461	72.6779	72.0941	14.403	13.274	11.8474	11.2401	5.11553	4.9257	91.7015	86.9415	20.7516	21.0823	16.3058	16.0272	6.97046	7.03514	22.0439	21.4655	24.8262	22.8286	8.82441	8.00178	8.86196	8.01687		0.335429	0.270164	0.302796	0.526853	0.667429	0.597141	0.460815	0.511868	0.486341	0.44637	0.51425	0.48031	-1.72114	-1.74786	-1.7345	0.785494	0.782239	0.783867	-0.424999	-0.490262	-0.45763	0.792742	0.70271	0.747726
Gh_A06G1462	0.0607993	0.13516	0	0	0	0	0	0	0.0469353	0	0.0503861	0	0	0	0	0	0.0271258	0	0.0463688	0.101455	0.067316	0.0727471	0.0572865	0.0623503		-0.373381	0.330866	-0.0212574	-1.75444	0	-0.877219	0	0	0	0	0	0	-1.16439	0.330866	-0.416761	-1.87431	-0.744695	-1.3095	-1.33651	-1.22457	-1.28054	-1.56927	-1.44707	-1.50817
Gh_A06G2090	0	0	0	0	0	0	0	0	0	0	0	0	0	0	0	0	0	0	0	0	0	0	0	0		0	0	0	0	0	0	0	0	0	0	0	0	0	0	0	0	0	0	0	0	0	0	0	0
Gh_A07G0467	0.298626	0.331931	0.158258	0.169684	0.204455	0.481396	0.244028	0.217305	0.230531	0.27077	0.346472	0.431765	0.0797289	0.0849503	0.0841548	0.0946761	0.0799399	0.120123	0.136649	0.199326	0.19838	0.214386	0.0562745	0.0612488		-0.373379	-0.293815	-0.333597	1.13046	1.3474	1.23893	-1.35861	-2.50253	-1.93057	-1.53593	-1.19865	-1.36729	-1.90135	-1.46637	-1.68386	-0.211804	0.232279	0.0102379	-0.0435168	-1.16701	-0.605265	-2.11649	-1.82697	-1.97173
Gh_A07G1432	1.24089	1.63006	1.71876	1.84285	0.707979	0.378855	1.23871	1.33394	0.348338	0.255713	1.86974	2.29362	0.414124	0.401131	1.19213	1.25176	0.0251648	0.0567217	0.12905	0.0941208	1.71736	1.6872	0.265726	0.578428		-1.83282	-2.67233	-2.25257	0.12147	0.315688	0.218579	-0.773644	0.0824277	-0.345608	-0.0552969	-0.0917358	-0.0735163	-5.62382	-4.84488	-5.23435	-3.73537	-4.29128	-4.01332	1.27841	2.15491	1.71666	-2.22083	-1.20548	-1.71316
Gh_A07G1757	15.3825	16.3209	7.02492	7.28383	7.97852	8.3753	9.8204	10.2113	11.605	12.0457	6.85684	6.79223	8.01159	8.20475	7.52585	7.66626	7.66884	8.05685	4.57708	4.47257	8.96722	9.16783	12.7369	14.1018		-0.406543	-0.438202	-0.422373	-0.0349379	-0.100812	-0.0678749	0.00596744	-0.0296815	-0.011857	-0.383927	-0.413572	-0.398749	-1.00421	-1.01843	-1.01132	-0.618054	-0.703593	-0.660824	0.16854	0.130439	0.14949	0.37516	0.465713	0.420437
Gh_A08G0161	93.1283	100.291	37.3308	38.2603	34.9299	38.4778	19.8931	22.5516	76.1308	78.8055	33.524	35.759	55.6603	56.8007	36.734	37.194	20.7979	21.8506	33.4188	32.6276	34.5517	33.8378	38.9935	39.8376		-0.290739	-0.347824	-0.319282	-0.155172	-0.0975418	-0.126357	0.672186	0.561882	0.617034	0.884848	0.72184	0.803344	-2.16278	-2.19845	-2.18061	-0.159706	-0.229755	-0.194731	-0.0157058	-0.185391	-0.100548	0.970966	0.820901	0.895933
Gh_A08G0221	0	0	0	0	0.0637414	0.0750407	0	0	0	0	0.0925861	0.0504781	0	0	0	0	0	0.0280875	0	0	0	0	0	0		0	0	0	-0.876667	-1.75181	-1.31424	1.41523	1.17979	1.29751	0	0	0	0	-2.59753	-1.29877	0	0	0	1.41523	1.17979	1.29751	0	0	0
Gh_A08G0882	16.0098	17.3855	8.50887	9.5161	4.31293	4.58211	9.32239	9.7643	12.2405	12.8447	9.65162	10.2743	7.83502	7.53954	4.60404	4.74125	5.81299	5.7787	8.76493	8.6915	7.60407	7.7396	10.4233	10.6829		-0.387293	-0.436711	-0.412002	0.181804	0.110598	0.146201	0.861269	0.718464	0.789867	-1.0178	-1.04225	-1.03002	-1.4616	-1.58907	-1.52534	0.042775	-0.130765	-0.0439951	0.818104	0.756247	0.787175	0.16104	0.129715	0.145378
Gh_A08G1149	0.262895	0.292215	0.0870762	0.0933634	0.149993	0.0882909	0	0	0.304422	0.178779	0.0544672	0	0.350946	0.37393	0	0	0.146615	0.033047	0.200498	0.219346	0.291073	0.275238	0.309633	0.471803		0.211586	-0.708853	-0.248634	-0.676891	0.864606	0.0938575	1.22635	2.08243	1.65439	0	0	0	-0.842454	-3.14444	-1.99345	1.20324	1.23228	1.21776	0.956486	1.64034	1.29841	0.865024	1.47265	1.16884
Gh_A08G1590	0	0	0	0	0	0	0	0	0	0	0	0	0	0	0	0	0	0	0	0	0.033861	0.0365929	0	0		0	0	0	0	0	0	0	0	0	0	0	0	0	0	0	0	0	0	-2.32784	-2.2159	-2.27187	0	0	0
Gh_A08G1591	0.535949	0.397148	0.394483	0.507558	0.611564	0.639977	0.212898	0.252778	0.413738	0.43196	0.394806	0.430498	0.31798	0.296453	0.167816	0.15733	0.318821	0.269484	0.408744	0.496852	0.329664	0.391887	0.448875	0.305345		-0.373378	0.121221	-0.126079	0.00118079	-0.237566	-0.118193	-0.943567	-1.11022	-1.02689	-0.343282	-0.684077	-0.51368	-0.749349	-0.559477	-0.654413	0.0512344	-0.0307565	0.010239	-0.891507	-0.707582	-0.799545	1.07615	0.272569	0.67436
Gh_A08G1601	0.115047	0.063939	0	0	0	0	0.0881372	0	0.488472	0.573735	0.143014	0.207924	0.0383949	0.0409094	0.0270175	0	0	0.0578476	0.0438706	0.0959891	0.0636892	0	0.1084	0.058991		2.08605	3.16562	2.62583	-0.249378	0.290522	0.0205716	-2.14655	-2.05503	-2.10079	-1.70586	0	-0.852928	0.563311	-0.144439	0.209436	-1.95421	-0.824592	-1.3894	-1.41641	0	-0.708207	0.298542	-1.52697	-0.614213
Gh_A08G2147	1.40004	1.22608	0.674504	0.602671	0.532522	0.626921	0.671708	0.643172	2.25984	2.00033	0.843821	0.920105	0.396445	0.331892	0.318821	0.313845	1.07891	1.17327	0.873612	0.884938	0.84551	0.659914	0.759511	0.696124		0.690753	0.706185	0.698469	0.32311	0.610428	0.466769	-0.42572	-0.91757	-0.671645	-1.07509	-1.03515	-1.05512	-0.375894	-0.0635181	-0.219706	0.373166	0.554206	0.463686	0.666981	0.0739944	0.370488	0.177237	0.11414	0.145688
Gh_A08G2197	0.15808	0.614986	0.314156	0.336839	0.0901914	0	0.0807363	0.09586	0.793217	0.501669	0.0655027	0.0714244	0.105513	0.112423	0	0.0417646	0.246848	0.278198	0.421962	0.59352	0.0437559	0.0472862	0.0744734	0		2.32706	-0.293818	1.01662	-2.26185	-2.23757	-2.24971	0.226359	-0.596598	-0.185119	1.07425	-1.19865	-0.0622015	0.642968	-1.14444	-0.250737	0.425632	0.817237	0.621435	-1.04351	-1.84604	-1.44478	-0.116492	0.826534	0.355021
Gh_A08G2564	0	0	0	0	0.147133	0	0.0329271	0.0390951	0	0	0.0534286	0.0582587	0	0	0	0	0	0	0	0.0537907	0	0	0	0		0	0	0	-1.66985	-1.54499	-1.60742	0.208414	0	0.104207	2.36819	2.12048	2.24433	0	0	0	0	-1.66011	-0.830053	0.208414	0	0.104207	2.36819	2.12048	2.24433
Gh_A08G2565	5.99	6.48398	3.42339	3.50372	2.59108	2.99781	4.55892	4.98558	4.23121	4.40179	4.02318	4.10386	3.18804	2.97918	2.86853	2.8548	1.67684	1.41735	2.5678	2.90718	3.22932	3.06827	4.53727	5.21938		-0.501486	-0.558789	-0.530138	0.232911	0.228094	0.230502	0.299116	-0.00899366	0.145061	-0.66838	-0.804372	-0.736376	-1.83681	-2.19368	-2.01525	-0.414893	-0.269267	-0.34208	0.317677	0.0335165	0.175597	-0.00686758	0.0661171	0.0296248
Gh_A08G2570	3.6623	3.69446	2.07948	1.96731	0.877941	1.07491	2.04335	2.3328	2.96974	2.73468	0.816149	0.806501	0.390291	0.437738	1.30092	1.52861	0.370728	0.448761	0.798021	0.873036	0.647412	0.736469	0.782934	0.789019		-0.302413	-0.433991	-0.368202	-1.34932	-1.28648	-1.3179	-1.16957	-1.29608	-1.23283	-0.651404	-0.609842	-0.630623	-3.30432	-3.04134	-3.17283	-1.38172	-1.17211	-1.27692	-0.43944	-0.545519	-0.49248	-1.38397	-1.56393	-1.47395
Gh_A09G0896	0	0	0	0	0	0	0	0	0	0	0	0	0	0	0	0	0	0	0	0	0	0	0.060172	0.0654908		0	0	0	0	0	0	0	0	0	0	0	0	0	0	0	0	0	0	0	0	0	-1.49837	-1.37617	-1.43727
Gh_A09G1291	0	0	0	0	0	0	0.0309131	0.0367038	0	0	0	0	0	0	0	0	0	0	0	0	0	0	0	0		0	0	0	0	0	0	0	0	0	2.45924	2.21153	2.33539	0	0	0	0	0	0	0	0	0	2.45924	2.21153	2.33539
Gh_A09G2501	32.0406	30.435	21.1869	20.4286	14.3094	15.9959	18.1856	18.6621	26.4663	28.4781	19.9267	20.4286	13.3998	14.6865	13.5628	12.9788	8.28958	7.7805	13.8192	13.5345	22.6733	23.6423	14.7966	15.2787		-0.275745	-0.0958785	-0.185812	-0.0884697	0	-0.0442349	-0.0947517	-0.123212	-0.108982	-0.423141	-0.523954	-0.473548	-1.95053	-1.9678	-1.95916	-0.616498	-0.593949	-0.605224	0.664031	0.563668	0.61385	-0.297531	-0.28859	-0.29306
Gh_A10G0049	0.897714	0.997834	0.209888	0.225042	0.421799	0.49657	0.64728	0.832575	0.652245	0.622451	0.743961	0.668062	0.21148	0.225329	0.545647	0.585962	0.518318	0.531042	0.12082	0.0881181	0.2631	0.252736	0.547313	0.649846		-0.460842	-0.68084	-0.570841	1.82561	1.56979	1.6977	-0.996034	-1.13996	-1.068	-0.246422	-0.506773	-0.376598	-0.792418	-0.909974	-0.851196	-0.79676	-1.35268	-1.07472	-0.680944	-0.974366	-0.827655	-0.242024	-0.357482	-0.299753
Gh_A10G0304	0	0	0	0.0824157	0.0662025	0.077938	0	0	0	0	0	0	0	0	0	0	0	0	0	0	0	0	0	0		0	0	0	0	1.04454	0.522272	1.36058	1.12514	1.24286	0	0	0	0	0	0	0	1.04454	0.522272	1.36058	1.12514	1.24286	0	0	0
Gh_A10G0470	13.9821	13.3489	15.3731	12.6096	25.3555	22.0565	30.283	26.9844	7.9274	6.47044	14.7607	11.6388	17.1162	15.06	26.2411	22.4403	5.51341	4.31745	7.16802	6.97051	21.1335	20.3742	25.2553	23.2634		-0.818661	-1.04479	-0.931723	-0.058647	-0.11558	-0.0871136	-0.566936	-0.550482	-0.558709	-0.20668	-0.266034	-0.236357	-1.34256	-1.62847	-1.48552	-1.10076	-0.855186	-0.977974	-0.262767	-0.11446	-0.188614	-0.261922	-0.214064	-0.237993
Gh_A10G1310	0	0	0	0	0	0	0	0	0	0	0	0	0	0	0	0	0	0	0	0	0	0	0	0		0	0	0	0	0	0	0	0	0	0	0	0	0	0	0	0	0	0	0	0	0	0	0	0
Gh_A10G2024	0	0	0	0	0	0	0.0322607	0.0383038	0	0	0.0523472	0.0570796	0	0	0	0	0	0	0	0	0.139872	0.151157	0.0595162	0.0647771		0	0	0	-1.69935	-1.57449	-1.63692	0	0	0	2.39769	2.14998	2.27383	0	0	0	0	0	0	-0.281428	-0.169487	-0.225457	0.883505	0.757996	0.820751
Gh_A10G2025	0.0404784	0	0	0	0	0	0	0	0.0312482	0	0.0670912	0.0365782	0	0	0.0190118	0.0427774	0.0180596	0.0203532	0	0	0.112043	0.0726494	0	0		-0.373379	0	-0.18669	-1.34134	-2.21648	-1.77891	0	0	0	-3.16057	-1.99061	-2.57559	-1.16439	-3.06221	-2.1133	0	0	0	-0.601482	-1.22651	-0.913997	0	0	0
Gh_A10G2026	0	0	0	0	0	0	0	0	0.0493772	0	0	0	0	0	0	0	0	0	0	0	0.0708181	0.0382659	0.0602669	0.065594		-1.78362	0	-0.891809	0	0	0	0	0	0	0	0	0	0	0	0	0	0	0	-1.26334	-2.1514	-1.70737	-1.4961	-1.3739	-1.435
Gh_A10G2027	0.063363	0	0	0.0900097	0.0723026	0.0851195	0.0647229	0.0768469	0	0.114905	0	0	0.0422925	0.0450622	0.0297602	0	0	0	0	0.0528667	0	0	0.0597021	0.0649794		1.42382	-0.565093	0.429365	0	0.917382	0.458691	-0.773646	-0.917572	-0.845609	-1.12089	1.14548	0.0122919	1.42382	0	0.711911	0	-0.767721	-0.383861	1.23342	0.997973	1.11569	-0.116495	-0.242005	-0.17925
Gh_A10G2239	1.16534	1.03625	0.540378	0.331083	0.465414	0.391369	0.922522	0.953999	1.43938	1.05664	0.531163	0.473877	1.28341	1.28458	0.301034	0.33867	0.363945	0.49806	0.711003	0.534764	0.709636	0.697173	1.81172	1.55359		0.304697	0.0281118	0.166404	-0.0248143	0.51732	0.246253	1.4634	1.7147	1.58905	-1.61566	-1.49411	-1.55488	-1.67896	-1.05698	-1.36797	0.395887	0.691709	0.543798	0.608565	0.832987	0.720776	0.973705	0.703546	0.838625
Gh_A11G0092	28.7995	31.1009	18.5787	17.4069	8.5241	8.67072	4.70212	5.12597	28.5809	29.1135	28.1027	28.2155	14.499	15.3786	3.30852	3.51441	16.8396	18.2864	29.7602	31.6009	12.896	12.976	6.14331	6.95514		-0.0109924	-0.095268	-0.0531302	0.597059	0.696829	0.646944	0.766334	0.8267	0.796517	-0.507125	-0.544543	-0.525834	-0.774186	-0.766185	-0.770186	0.679735	0.860306	0.770021	0.597304	0.581622	0.589463	0.385705	0.440255	0.41298
Gh_A11G0221	1.6676	0	4.41874	4.73779	1.90287	4.48038	2.55508	4.04494	0	0	1.38199	1.50692	0	0	0	0	1.48801	1.67699	0	0	1.84634	1.9953	0	0		-3.29417	0	-1.64708	-1.67689	-1.65261	-1.66475	-3.48457	-4.72001	-4.10229	-3.90976	-4.57251	-4.24114	-0.164389	3.30227	1.56894	-4.70003	-4.80061	-4.75032	-0.0435088	-1.16702	-0.605262	-3.90976	-4.57251	-4.24114
Gh_A11G0757	0	0.0666807	0	0	0.0684539	0.161177	0.0919165	0.145513	0	0	0	0.05421	0.0400413	0	0	0	0.0267648	0.0603281	0	0	0.0664202	0.0358895	0.0565242	0.123041		0	1.35019	0.675097	0	-1.6489	-0.824452	-0.773644	0.0768889	-0.348378	0.887139	0.224387	0.555763	-2.66713	-0.144439	-1.40578	0	0	0	-0.0435107	-2.16701	-1.10526	-0.701455	-0.242009	-0.471732
Gh_A11G1366	8.91183	9.46688	5.97828	6.49005	6.24309	6.44053	3.48568	3.65977	7.44573	7.46681	4.58087	4.4853	6.62598	7.50116	4.84798	4.88781	2.91912	2.46739	3.01117	3.38835	5.77659	5.70274	6.16484	6.0735		-0.259308	-0.342397	-0.300853	-0.384109	-0.533025	-0.458567	0.0858736	0.219934	0.152904	0.475944	0.417435	0.446689	-1.61019	-1.9399	-1.77505	-0.989406	-0.937647	-0.963526	-0.112042	-0.175524	-0.143783	0.822623	0.730775	0.776699
Gh_A11G3111	0.93583	0.762813	0	0	0.142382	0.167621	0.223047	0.264828	0.481623	0.509121	0.258516	0.394642	0.291495	0.266216	0.0879076	0.0659321	0.278349	0.28233	0.333067	0.260269	0.172689	0.111973	0.117568	0.319901		-0.958342	-0.583321	-0.770832	0.604719	1.21501	0.909864	1.0337	0.667394	0.850549	-1.34329	-2.006	-1.67465	-1.74935	-1.43395	-1.59165	0.970278	0.614469	0.792373	0.278409	-0.582052	-0.151821	-0.923852	0.27257	-0.325641
Gh_A12G0208	0.065406	0.0727005	0	0	0.0746338	0.0878639	0	0	0	0	0	0	0	0	0	0	0	0	0	0	0.0362082	0.0782591	0.061627	0		1.37804	1.2255	1.30177	0	0	0	1.18763	0.952192	1.06991	0	0	0	1.37804	1.2255	1.30177	0	0	0	-1.04351	-0.167012	-0.605262	-1.4639	0	-0.73195
Gh_A12G0209	0	0	0	0	0	0	0	0	0	0	0	0	0	0	0	0	0.0308733	0.0347943	0	0	0	0	0	0		0	0	0	0	0	0	0	0	0	0	0	0	-2.4611	-2.28861	-2.37486	0	0	0	0	0	0	0	0	0
Gh_A12G0221	0	0	0	0	0	0	0	0	0	0	0	0	0	0	0	0	0	0	0	0	0	0	0	0		0	0	0	0	0	0	0	0	0	0	0	0	0	0	0	0	0	0	0	0	0	0	0	0
Gh_A12G0939	83.3706	85.2526	12.4522	12.4448	22.3102	21.1991	9.86716	9.9916	139.155	136.931	12.3086	11.6912	41.164	39.6925	16.9763	16.9835	15.013	14.2943	28.3181	26.9623	18.1466	17.2157	28.2072	27.6067		0.739082	0.683633	0.711358	-0.016734	-0.09012	-0.053427	0.88368	0.904863	0.894272	0.782815	0.765346	0.774081	-2.47333	-2.5763	-2.52482	1.18532	1.1154	1.15036	-0.298004	-0.300278	-0.299141	1.51536	1.46623	1.49079
Gh_A12G0940	3.08373	3.16895	2.69802	2.64487	1.19506	1.40691	1.27779	1.623	3.14412	3.27088	1.78408	1.73506	1.04856	1.03447	1.17508	1.07604	0.804722	0.731391	0.843105	1.06799	2.54458	3.06316	1.15126	0.954684		0.0279798	0.0456739	0.0368269	-0.596721	-0.608211	-0.602466	-0.188674	-0.443638	-0.316156	-0.120892	-0.592931	-0.356912	-1.93811	-2.11529	-2.0267	-1.67812	-1.3083	-1.49321	1.09034	1.12249	1.10642	-0.150437	-0.765568	-0.458002
Gh_A12G0941	2.44366	2.42255	0.525009	0.469096	0.602902	0.621055	0.573429	0.560696	1.58053	1.37733	0.109466	0.179044	0.573073	0.610603	0.496316	0.488571	0.677721	0.63096	0.151108	0.165313	0.475304	0.592676	0.808977	0.812755		-0.628635	-0.814652	-0.721644	-2.26186	-1.38957	-1.82571	-0.0732046	-0.0244864	-0.0488455	-0.208356	-0.198651	-0.203503	-1.85028	-1.94091	-1.89559	-1.79676	-1.50468	-1.65072	-0.343073	-0.0674774	-0.205275	0.496484	0.535602	0.516043
Gh_A12G2124	25.014	16.6822	19.8843	26.0578	28.5431	8.96076	16.1822	9.10112	20.5974	13.6084	27.6397	27.1246	18.9221	23.7191	25.8467	23.7912	14.1361	19.2854	13.9898	13.9135	25.8488	25.939	7.85626	10.2608		-0.280274	-0.293812	-0.287043	0.475112	0.0578866	0.266499	-0.59307	1.40436	0.405643	0.675572	1.38631	1.03094	-0.823352	0.2092	-0.307076	-0.507254	-0.90523	-0.706242	-0.143045	1.53343	0.695193	-1.04249	0.173027	-0.434733
Gh_A12G2187	1.24535	1.02314	0.43042	0.384581	0.556064	0.581899	0.276539	0.262673	0.794181	0.736424	0.987186	1.0275	0.505965	0.346564	0.152586	0.114442	0.869663	0.843986	1.03236	0.903525	0.479594	0.291537	0.510174	0.333162		-0.649012	-0.474395	-0.561703	1.19758	1.41778	1.30768	-0.136213	-0.747647	-0.44193	-0.85786	-1.19865	-1.02826	-0.518023	-0.277713	-0.397868	1.26213	1.23228	1.2472	-0.213437	-0.99709	-0.605264	0.883506	0.342956	0.613231
Gh_A13G0001	0.0932027	0.103597	0.123482	0.132398	0.106352	0.25041	0.571218	0.395628	0.1439	0.169017	0.308959	0.421112	0.373257	0.331418	0.350202	0.344737	0	0	0.284326	0.155527	0.82554	1.00366	0.614725	0.382321		0.626623	0.706186	0.666405	1.32311	1.66932	1.49622	1.81132	0.40436	1.10784	-0.705854	-0.198648	-0.452251	0.867091	0.714553	0.790822	1.20325	0.232284	0.717765	2.95649	2.00291	2.4797	0.1059	-0.0493601	0.0282698
Gh_A13G0281	7.30549	6.71359	1.21939	1.22572	1.57534	1.00457	1.49833	1.63947	7.90437	8.60602	1.38247	1.29953	0.614319	0.818187	1.64807	1.42858	3.20804	3.32624	1.31612	1.43984	1.30563	1.4798	1.1924	1.76973		0.113669	0.358262	0.235966	0.181089	0.0843605	0.132725	-1.3586	-0.296076	-0.827339	0.137422	-0.198648	-0.0306128	-1.18729	-1.01319	-1.10024	0.110131	0.232279	0.171205	-0.270917	0.558824	0.143953	-0.329487	0.1103	-0.109594
Gh_A13G1017	50.3924	42.4095	26.7055	19.4301	24.6437	18.3744	9.9271	6.11161	52.7949	39.8171	26.8467	22.7685	23.5446	19.4548	19.2727	19.3998	21.8404	18.0987	25.8043	21.623	23.1145	23.2567	15.6009	12.5503		0.0671924	-0.0909993	-0.0119035	0.00760787	0.228746	0.118177	-0.0658227	0.082429	0.00830317	0.957114	1.66642	1.31177	-1.20621	-1.2285	-1.21735	-0.0495254	0.154273	0.052374	-0.0924207	0.339949	0.123764	0.652185	1.0381	0.845141
Gh_A13G1684	50.6478	47.4386	46.6118	44.4429	28.8294	25.0584	22.1591	21.9071	26.6582	25.8519	22.9434	19.3633	25.6891	23.5092	20.7938	20.6487	8.03263	6.55956	23.9054	22.5572	31.2734	29.3822	25.9743	24.2749		-0.92592	-0.875791	-0.900856	-1.02262	-1.19863	-1.11062	-0.166384	-0.0920689	-0.129227	-0.0917459	-0.0853476	-0.0885467	-2.65656	-2.85439	-2.75547	-0.963359	-0.978365	-0.970862	0.117395	0.229648	0.173522	0.229186	0.148067	0.188626
Gh_D02G0889	0.0585192	0.0650457	0	0	0.0667754	0.0786125	0.0298876	0.0354862	0.0451752	0.0530605	0.0484965	0.0528808	0	0	0	0	0	0	0.04463	0.0488253	0.0647915	0.105028	0	0		-0.373379	-0.293815	-0.333597	-1.80958	-1.68472	-1.74715	1.34815	1.1127	1.23043	2.50792	2.2602	2.38406	1.53855	1.38601	1.46228	-1.92945	-1.79983	-1.86464	-0.0435122	0.417943	0.187216	2.50792	2.2602	2.38406
Gh_D03G0815	6.38781	6.70938	10.5594	11.1554	8.35898	8.58114	7.12351	6.96534	4.20736	4.46352	6.65362	6.46078	4.53744	4.50118	5.25725	5.45003	2.22243	2.41629	4.20128	4.05835	4.76906	4.97853	6.84701	6.85125		-0.602406	-0.587998	-0.595202	-0.666316	-0.787962	-0.727139	-0.881448	-0.930866	-0.906157	-0.43828	-0.35393	-0.396105	-1.52318	-1.47339	-1.49828	-1.32963	-1.45878	-1.3942	-0.809622	-0.785449	-0.797536	-0.0571142	-0.0238265	-0.0404704
Gh_D03G1406	0.463474	0.57956	0.153512	0.246894	0.396648	0.23348	0.621365	0.632366	0.178895	0.21012	0.336082	0.314113	0.309352	0.370813	0.408156	0.428573	0.180933	0.174782	0.220919	0.193349	0.416935	0.485234	0.382109	0.237649		-1.37338	-1.46374	-1.41856	1.13046	0.347392	0.738927	-0.35861	0.667393	0.154391	-0.60632	-0.561219	-0.58377	-1.35703	-1.7294	-1.54322	0.525166	-0.352684	0.0862408	0.0719632	1.05538	0.563672	-0.701457	-1.41193	-1.05669
Gh_D03G1832	0.054804	0.0609161	0	0	0	0	0	0	0.0846143	0.149075	0	0	0	0	0	0	0	0	0	0	0	0	0	0		0.62662	1.29114	0.958882	0	0	0	0	0	0	0	0	0	1.63318	1.48064	1.55691	0	0	0	0	0	0	0	0	0
Gh_D05G0233	1.80542	1.72675	0.55627	0.775364	0.383281	0.451224	0.557538	0.560134	1.42614	1.37052	0.695907	0.948524	0.420367	0.328457	0.374681	0.377154	1.16141	1.20335	0.736486	0.735655	0.371893	0.502373	0.474727	0.301402		-0.340219	-0.333336	-0.336777	0.323109	0.290811	0.30696	0.133247	-0.458139	-0.162446	-0.573407	-0.570618	-0.572013	-0.636457	-0.521003	-0.57873	0.404873	-0.0758444	0.164514	-0.0435149	0.154915	0.0557001	-0.231972	-0.894083	-0.563028
Gh_D05G0906	0.505059	0.842081	0.802972	1.07619	0.115263	0.203543	0.257949	0.306269	0.584838	0.503741	0.711547	0.684594	0.303398	0.25143	0.189772	0.266872	0.630935	0.736461	0.847409	0.884928	0.503274	0.513664	0.0951758	0.414355		0.211585	-0.741277	-0.264846	-0.174391	-0.652612	-0.413501	1.39628	0.304823	0.850553	-0.442819	-0.198651	-0.320735	0.321039	-0.19335	0.0638448	0.0777088	-0.282301	-0.102296	2.12641	1.33549	1.73095	-1.43842	0.436068	-0.501176
Gh_D05G1060	4.87544	5.54234	1.68824	1.81014	2.40233	2.75376	5.51769	5.40901	2.86554	3.16478	1.23967	1.05136	1.51615	1.57604	2.99246	3.13239	1.73027	1.75501	0.802809	0.785825	1.77889	1.88927	3.54972	3.40896		-0.766725	-0.80839	-0.787558	-0.445564	-0.783845	-0.614704	-0.664022	-0.805099	-0.73456	-0.882732	-0.788101	-0.835417	-1.49454	-1.65902	-1.57678	-1.07239	-1.20382	-1.13811	-0.433457	-0.543574	-0.488515	-0.636359	-0.666033	-0.651196
Gh_D05G1339	56.7171	57.7241	34.0155	33.2388	26.7665	27.8272	14.4538	15.1444	57.0723	58.0399	50.3397	52.3596	40.6219	40.2943	16.4711	16.9887	17.2862	17.0464	42.8995	40.5544	45.2559	44.9276	24.0261	22.4996		0.00900694	0.00787126	0.0084391	0.565504	0.655586	0.610545	0.601829	0.53408	0.567955	0.188488	0.165791	0.17714	-1.71416	-1.75971	-1.73693	0.334769	0.28699	0.310879	0.757677	0.691106	0.724392	0.733154	0.571115	0.652134
Gh_D05G1759	5.06207	5.11512	3.96302	3.59544	5.57934	5.02287	3.11418	3.1743	3.3749	3.7032	5.62523	5.56198	8.10133	8.01824	4.26877	4.22495	1.25755	1.18588	5.2206	5.51937	6.20969	5.91918	7.47961	6.72497		-0.584883	-0.465996	-0.525439	0.505312	0.62943	0.567371	0.538064	0.674774	0.606419	0.454968	0.412496	0.433732	-2.00911	-2.10881	-2.05896	0.397615	0.618335	0.507975	0.154427	0.236885	0.195656	1.26411	1.08309	1.1736
Gh_D05G1955	0	0	0	0	0	0	0.0301924	0.0358481	0	0	0	0	0	0	0	0	0	0	0	0	0.0981786	0.1061	0.0557006	0.0606241		0	0	0	0	0	0	0	0	0	2.49328	2.24557	2.36942	0	0	0	0	0	0	-0.792054	-0.68011	-0.736082	0.883507	0.757995	0.820751
Gh_D05G1956	0	0	0	0	0	0	0	0	0	0	0	0	0	0	0	0	0	0	0	0	0.0994831	0.143346	0.0564407	0.0614297		0	0	0	0	0	0	0	0	0	0	0	0	0	0	0	0	0	0	-0.773011	-0.246033	-0.509522	-1.59073	-1.46853	-1.52963
Gh_D05G2004	28.7086	29.5755	35.4843	35.2282	64.9187	64.4336	29.5036	28.9442	13.6037	14.0206	46.6645	45.4521	70.6111	70.5047	32.9147	32.9908	7.8621	7.1589	33.1537	30.8662	55.0113	53.0963	55.2545	53.9153		-1.07748	-1.07685	-1.07717	0.395145	0.367616	0.38138	0.121261	0.129906	0.125584	0.157841	0.188789	0.173315	-1.8685	-2.04659	-1.95754	-0.098011	-0.190703	-0.144357	-0.238906	-0.279202	-0.259054	0.905201	0.89742	0.901311
Gh_D05G2497	9.88828	10.0752	4.055	3.6789	3.49247	3.7953	2.82573	2.64121	6.22492	5.97726	5.70702	5.95702	3.57504	3.43243	2.15628	2.05266	2.83609	2.90033	4.17467	4.27245	3.09546	3.13393	3.4384	3.56126		-0.667664	-0.753252	-0.710458	0.493036	0.695316	0.594176	0.0337117	-0.144984	-0.055636	-0.390079	-0.363704	-0.376892	-1.80182	-1.79652	-1.79917	0.0419602	0.215789	0.128875	-0.174094	-0.276241	-0.225167	0.283114	0.431189	0.357151
Gh_D05G3705	1.56871	1.74366	1.30859	1.32054	0.994459	0.780496	1.0089	1.02173	1.70437	1.73846	0.722239	0.840035	0.930715	0.909028	1.52815	1.5964	0.492511	0.438206	0.664656	0.533232	0.836259	0.695176	0.930637	0.893735		0.11966	-0.00430888	0.0576755	-0.857465	-0.652607	-0.755036	-0.0955724	0.219933	0.0621805	0.599003	0.643808	0.621406	-1.67135	-1.99244	-1.83189	-0.977333	-1.30829	-1.14281	-0.249962	-0.167013	-0.208488	-0.116493	-0.193095	-0.154794
Gh_D06G0158	0.0617242	0.0686082	0.0817772	0	0	0	0	0	0	0	0.0511526	0.055777	0.0411987	0.0438968	0.0289905	0.032615	0	0	0	0	0	0	0	0		1.46163	1.30908	1.38535	-0.676891	-1.60779	-1.14234	-2.04486	-1.95335	-1.99911	-2.55188	-2.38193	-2.4669	1.46163	1.30908	1.38535	1.05576	0	0.527882	0	0	0	0	0	0
Gh_D06G0164	119.255	122.313	73.9452	73.115	38.7078	39.2623	23.6495	23.4175	117.795	119.465	73.928	74.5125	34.3934	34.6842	22.9062	23.0101	21.6542	21.66	46.1914	45.7837	30.7026	30.2655	28.3677	28.2873		-0.0177715	-0.0339897	-0.0258806	-0.000335617	0.0273151	0.0134897	-0.170493	-0.178866	-0.174679	-0.0460715	-0.0253198	-0.0356957	-2.46133	-2.49747	-2.4794	-0.678832	-0.675333	-0.677083	-0.334263	-0.375471	-0.354867	0.26244	0.272567	0.267503
Gh_D06G1476	71.2996	70.0703	14.3633	12.5485	19.6361	21.4217	18.2221	18.3658	67.44	65.6369	19.1573	18.6084	20.9044	20.8456	16.9729	16.7308	10.3647	9.46018	12.1615	11.1511	13.1464	13.3834	17.1869	16.7061		-0.0802894	-0.094296	-0.0872927	0.415507	0.568439	0.491973	0.0902982	-0.0393301	0.0254841	-0.102456	-0.134515	-0.118486	-2.78222	-2.88886	-2.83554	-0.240066	-0.170329	-0.205197	-0.578841	-0.678628	-0.628734	-0.0843799	-0.136647	-0.110513
Gh_D06G1660	0.107716	0.11973	0.0713557	0.0765078	0.0614568	0.0723511	0.0550141	0.0653195	0.0831541	0.0488342	0.0892677	0.0486689	0	0	0.025296	0.0284586	0.024029	0	0.0821505	0.0898728	0	0	0.0507465	0.0552321		-0.373373	-1.29382	-0.833597	0.32311	-0.652607	-0.164749	1.46789	1.23245	1.35017	-1.12089	-1.19865	-1.15977	-2.16438	0.50575	-0.829317	0.203241	0.232278	0.217759	1.46789	1.23245	1.35017	-0.116493	-0.242007	-0.17925
Gh_D06G1794	14.1875	14.2808	16.6186	15.3965	12.2287	11.6153	6.74841	6.86789	8.46104	8.22637	15.1385	15.5167	10.6076	10.5661	4.80462	5.05139	2.41782	2.81674	11.9811	12.1929	9.9103	9.98131	5.85199	5.68239		-0.745713	-0.795749	-0.770731	-0.134577	0.0112193	-0.0616786	-0.205173	-0.136583	-0.170878	-0.490125	-0.443187	-0.466656	-2.55284	-2.34198	-2.44741	-0.472038	-0.336561	-0.4043	-0.30327	-0.218725	-0.260998	-0.20562	-0.273369	-0.239495
Gh_D06G1795	0	0	0	0	0	0	0	0	0	0	0	0	0	0	0	0	0	0	0	0	0	0	0	0		0	0	0	0	0	0	0	0	0	0	0	0	0	0	0	0	0	0	0	0	0	0	0	0
Gh_D06G2355	9.17709	8.22373	3.58159	4.34548	3.97768	4.58722	0.690337	0.819652	8.18282	6.90195	5.77768	5.65715	5.793	6.12178	1.16945	1.05253	1.90437	1.60967	5.9681	5.81685	3.8595	3.78785	1.54169	1.31319		-0.165439	-0.252789	-0.209114	0.68989	0.38056	0.535225	0.542383	0.416331	0.479357	0.760457	0.360778	0.560618	-2.26872	-2.35303	-2.31088	0.736672	0.420723	0.578697	-0.0435133	-0.276241	-0.159877	1.15914	0.679992	0.919566
Gh_D06G2361	0.983101	1.09274	0.407028	0.698267	0.631014	0.247624	0.0941437	0.0372597	1.80245	1.55994	0.458282	0.61076	0.615173	0.699158	0.173153	0.0974004	1.12395	1.29759	1.17151	1.38417	0.78234	0.624906	0	0.252045		0.874548	0.51354	0.694044	0.171108	-0.193173	-0.0110328	-0.0366798	1.49747	0.730394	0.879111	1.38631	1.13271	0.193166	0.247884	0.220525	1.52517	0.98717	1.25617	0.310124	1.33549	0.822806	0.852598	2.75799	1.8053
Gh_D07G0532	0	0	0	0	0	0	0	0	0	0	0.049496	0.0539706	0	0	0	0	0.0266466	0	0	0	0.132254	0	0.0562745	0		0	0	0	-1.78015	-1.65529	-1.71772	0	0	0	0	0	0	-2.67351	0	-1.33676	0	0	0	-0.362223	0	-0.181112	-1.59498	0	-0.797491
Gh_D07G1515	0	0.190035	0	0	0	0	0	0	0	0	0	0	0	0	0	0	0.152556	0.257896	0.130389	0.142646	0	0.102282	0.16109	0		0	-0.16073	-0.0803652	0	0	0	0	0	0	0	0	0	-0.156196	0.440524	0.142164	-0.382713	-0.253095	-0.317904	0	-0.732982	-0.366491	-0.0776678	0	-0.0388339
Gh_D07G1529	2.70739	2.69587	1.49457	1.44223	1.15851	1.21234	1.93009	1.53916	0.696677	0.715995	3.87972	3.72076	0.602362	0.722037	1.35108	1.5796	0.352308	0.397052	0.387151	0.376483	1.99839	2.22711	1.0629	1.09901		-1.95834	-1.91273	-1.93554	1.37622	1.3673	1.37176	-0.943568	-0.74765	-0.845609	-0.514555	0.0374161	-0.238569	-2.94199	-2.76335	-2.85267	-1.94876	-1.93764	-1.9432	0.786568	0.877378	0.831973	-0.860662	-0.485939	-0.6733
Gh_D07G1962	16.5478	17.5514	9.34082	9.35309	10.5051	11.1149	8.51101	8.90399	11.7849	12.3098	7.62944	7.73998	9.7228	9.86228	7.69005	8.0973	6.23906	6.50408	5.73246	5.8824	10.1607	10.2833	12.7918	13.0263		-0.4897	-0.511779	-0.500739	-0.291972	-0.273113	-0.282543	-0.111646	-0.172502	-0.142074	-0.146337	-0.137011	-0.141674	-1.40724	-1.43217	-1.4197	-0.704395	-0.669038	-0.686717	-0.0480901	-0.112192	-0.0801409	0.587817	0.548903	0.56836
Gh_D08G0012	0	0	0	0	0	0	0.0309131	0.0367038	0.0467253	0.0548811	0	0	0	0	0	0	0	0	0	0	0.0670147	0.0724215	0	0		-1.86326	-1.63115	-1.74721	0	0	0	0	0	0	2.45924	2.21153	2.33539	0	0	0	0	0	0	-1.34299	-1.23104	-1.28702	2.45924	2.21153	2.33539
Gh_D08G0013	5.9041	6.37719	3.3145	3.07998	2.28376	2.59897	4.41238	4.89505	5.61356	5.41385	4.11888	4.2501	2.84983	2.8704	2.58502	2.73196	2.72343	2.8345	3.51065	3.39537	3.37926	3.27274	4.43153	5.13112		-0.0728012	-0.236266	-0.154534	0.313461	0.464576	0.389018	0.319465	0.143312	0.231388	-0.771382	-0.841387	-0.806384	-1.11629	-1.16983	-1.14306	0.0829469	0.140648	0.111797	0.565296	0.332559	0.448928	0.00624784	0.0679502	0.037099
Gh_D08G0018	0.0311299	0	0	0	0	0	0	0	0	0	0.0515964	0.0843914	0	0	0	0	0.0138887	0	0	0	0	0	0	0		2.44916	0	1.22458	-1.72019	-1.01037	-1.36528	0	0	0	0	0	0	-1.16439	0	-0.582195	0	0	0	0	0	0	0	0	0
Gh_D08G0019	0	0	0	0	0	0	0.175149	0.207958	0	0	0	0	0	0	0	0	0	0	0	0	0	0	0	0		0	0	0	0	0	0	0	0	0	-0.043048	-0.290757	-0.166903	0	0	0	0	0	0	0	0	0	-0.043048	-0.290757	-0.166903
Gh_D08G0020	0.183775	0.13618	0.0811599	0.348079	0.0699009	0.082292	0.281578	0.185736	0.0945793	0.111088	0	0.0553559	0.0408877	0.0435654	0.201401	0.226581	0	0.0308017	0.42047	0.204442	0.0339121	0.0732963	0.057719	0.062821		-0.958344	-0.293812	-0.626078	1.0667	-2.65261	-0.792955	-0.773644	-0.917569	-0.845607	-0.483464	0.286773	-0.0983452	-0.112406	-2.14443	-1.12842	2.37316	-0.767723	0.80272	-1.04351	-0.167012	-0.605261	-2.28642	-1.56393	-1.92518
Gh_D08G0220	57.5165	63.206	22.8319	22.1637	18.9201	19.0608	12.994	12.9227	51.3676	50.8204	17.9759	18.3729	24.1662	24.3184	17.9754	18.9301	12.8306	12.7107	16.7915	18.2792	20.3744	20.5547	20.028	20.2931		-0.163117	-0.314654	-0.238886	-0.344987	-0.270619	-0.307803	0.353071	0.35144	0.352255	0.468178	0.550775	0.509476	-2.16439	-2.31402	-2.2392	-0.44332	-0.277996	-0.360658	0.106838	0.10886	0.107849	0.624173	0.651082	0.637627
Gh_D08G0301	0	0	0	0	0	0	0.0580991	0.0689824	0.0439085	0	0	0	0	0	0	0	0.0253765	0.0285994	0.130136	0.0949125	0	0.0680558	0.107184	0.116659		-1.95296	0	-0.976481	0	0	0	0	0	0	1.54895	1.30123	1.42509	-2.74397	-2.57148	-2.65772	-0.385515	-0.840865	-0.61319	0	-1.32074	-0.660372	0.883502	0.757997	0.82075
Gh_D08G1072	3.27464	3.67419	2.29204	2.45753	1.09279	1.12051	1.2149	1.38628	2.24175	2.29691	1.53611	1.67498	1.19595	1.31821	0.754503	0.832509	2.86685	2.85815	1.50788	1.62384	1.88122	1.73729	1.86291	1.83749		-0.546711	-0.677732	-0.612221	-0.577351	-0.553065	-0.565208	0.130141	0.234425	0.182283	-0.687239	-0.735681	-0.71146	-0.19187	-0.362345	-0.277107	-0.604111	-0.5978	-0.600955	0.783652	0.632683	0.708168	0.61672	0.406518	0.511619
Gh_D08G1431	0	0	0	0	0	0	0	0	0	0	0	0	0.0399232	0	0	0	0	0	0.0912338	0.049905	0.0662243	0.0357837	0	0.122678		0	0	0	0	0	0	-2.09024	0	-1.04512	0	0	0	0	0	0	-0.897894	-1.76828	-1.33309	-1.3601	-2.24816	-1.80413	0	-0.470658	-0.235329
Gh_D08G1900	0	0	0	0	0	0	0	0	0	0	0	0	0	0	0	0	0.0545788	0.0307552	0	0.0510335	0.033861	0.0365929	0	0		0	0	0	0	0	0	0	0	0	0	0	0	-1.63912	-2.46663	-2.05288	0	-1.73602	-0.868009	-2.32784	-2.2159	-2.27187	0	0	0
Gh_D08G1912	0.575236	0.63939	0	0.163429	0.0656393	0.077275	0.146895	0.13953	0.399659	0.417262	0.381371	0.415849	0.115185	0.0818187	0.0810526	0.151977	0.0256643	0	0.175482	0.191978	0	0.0688277	0.0542001	0.058991		-0.525384	-0.615743	-0.570564	1.16566	1.3474	1.25653	0.811321	0.0824289	0.446875	-0.857855	0.123278	-0.367289	-4.48632	-1.91116	-3.19874	0.0457883	0.232277	0.139033	1.3729	-0.167012	0.602945	-1.43842	-1.24201	-1.34021
Gh_D08G2514	2.29097	1.88628	0.955547	0.602671	0.629344	0.740906	0.693376	0.823261	2.29259	1.73106	1.26573	1.30348	0.311492	0.392236	0.338747	0.336263	1.6089	1.53592	1.39131	1.62829	0.798537	0.634533	0.519666	0.696124		0.0010198	-0.123888	-0.0614342	0.405571	1.11293	0.759248	-1.01465	-0.917569	-0.966111	-1.03343	-1.29176	-1.16259	-0.509884	-0.296441	-0.403162	0.542045	1.43392	0.98798	0.34351	-0.223595	0.0599576	-0.416053	-0.242006	-0.329029
Gh_D08G2562	4.28426	4.10973	1.16633	1.41728	1.33937	1.26144	0.929195	0.782954	4.30406	3.88462	1.31319	1.27281	1.52773	1.58604	1.13015	1.05437	0.497498	0.354114	1.07422	0.832431	1.2346	1.15866	0.884763	0.902785		0.00665215	-0.0812701	-0.037309	0.1711	-0.155108	0.00799595	0.189835	0.330358	0.260096	0.282461	0.429382	0.355921	-3.10628	-3.53676	-3.32152	-0.118687	-0.767722	-0.443204	-0.117511	-0.122614	-0.120063	-0.0706903	0.205455	0.0673823
Gh_D09G0438	30.3724	30.2431	13.0322	12.5023	12.734	10.8185	14.4839	15.139	26.7328	26.2875	14.5398	13.0473	9.98268	9.04097	10.753	10.608	7.64798	7.34664	11.3186	10.8948	15.7631	15.5206	12.195	11.3853		-0.18415	-0.202229	-0.19319	0.157927	0.0615578	0.109742	-0.351187	-0.258951	-0.305069	-0.429711	-0.513117	-0.471414	-1.98961	-2.04145	-2.01553	-0.203385	-0.198554	-0.200969	0.307866	0.520684	0.414275	-0.24816	-0.411098	-0.329629
Gh_D09G0922	0	0	0	0	0	0	0	0	0	0	0	0	0	0	0	0	0	0	0	0	0	0	0	0		0	0	0	0	0	0	0	0	0	0	0	0	0	0	0	0	0	0	0	0	0	0	0	0
Gh_D09G1326	0	0	0	0	0	0	0	0	0	0	0	0	0	0	0	0	0	0	0	0	0	0	0	0		0	0	0	0	0	0	0	0	0	0	0	0	0	0	0	0	0	0	0	0	0	0	0	0
Gh_D10G0056	1.84824	1.93697	0.489738	0.450084	0.542313	0.709386	0.91698	1.1528	0.652245	0.57457	0.787724	0.715781	0.387713	0.488213	0.793668	0.837089	0.447638	0.345177	0.201366	0.220295	0.643134	0.568655	0.597069	0.595692		-1.50267	-1.75325	-1.62796	0.68568	0.669324	0.677502	-0.484137	-0.53906	-0.511598	-0.208355	-0.461689	-0.335022	-2.04575	-2.48839	-2.26707	-1.28219	-1.03076	-1.15647	0.245994	-0.319017	-0.0365118	-0.618993	-0.952504	-0.785748
Gh_D10G0306	0	0	0	0	0	0	0.0592622	0	0	0	0	0	0	0	0	0	0	0	0	0	0.0321178	0.0347091	0	0		0	0	0	0	0	0	0	0	0	1.52035	0	0.760175	0	0	0	0	0	0	-2.40409	-2.29215	-2.34812	1.52035	0	0.760175
Gh_D10G0493	8.58653	7.54505	3.76642	3.37904	4.36936	4.28659	4.26688	3.6589	3.9861	4.20842	3.99068	3.14562	4.33713	4.24982	3.86941	3.61742	2.66611	2.36293	3.31853	2.85597	4.84979	3.78329	6.01316	5.47374		-1.1071	-0.842252	-0.974675	0.0834407	-0.103269	-0.00991416	-0.0106813	-0.0124287	-0.011555	-0.141068	-0.0164489	-0.0787584	-1.68734	-1.67495	-1.68115	-0.18265	-0.242633	-0.212641	0.1505	-0.180189	-0.0148444	0.494942	0.581117	0.538029
Gh_D10G1396	0	0	0	0	0	0	0	0	0	0	0	0	0	0	0	0	0	0	0	0	0	0	0	0		0	0	0	0	0	0	0	0	0	0	0	0	0	0	0	0	0	0	0	0	0	0	0	0
Gh_D10G2586	1.10707	1.10101	0.540378	0.331083	0.265951	0.234821	0.357105	0.353333	0.494786	0.475487	0.338013	0.263265	0.155565	0.290067	0.355768	0.461823	0.155976	0.175786	0.444377	0.486149	0.354818	0.557738	0.494106	0.597535		-1.16187	-1.21135	-1.18661	-0.67689	-0.330677	-0.503784	-0.773643	0.304825	-0.234409	-0.00541158	0.386312	0.19045	-2.82735	-2.64694	-2.73714	-0.282185	0.554206	0.13601	0.415919	1.24803	0.831972	0.468472	0.757995	0.613233
Gh_D11G0095	32.0103	33.2132	14.4115	15.2659	8.56149	8.18656	5.87347	5.86109	36.9781	38.2337	21.6676	22.8862	13.3837	13.2815	3.83173	4.08572	15.8456	16.7708	23.2134	23.646	11.5175	11.3099	7.87208	7.25754		0.208135	0.203088	0.205611	0.588319	0.584165	0.586242	0.644543	0.698089	0.671316	-0.616217	-0.520579	-0.568398	-1.01445	-0.985805	-1.00013	0.687737	0.631284	0.65951	0.427894	0.466257	0.447075	0.422532	0.308312	0.365422
Gh_D11G0235	0	0	0	2.36889	3.80575	2.24019	5.11017	6.06742	0	1.51204	5.52795	3.01385	0	0	0.783234	1.76231	5.95205	10.9005	2.54361	1.39135	0.92317	0.997652	3.1425	3.42028		0	3.15289	1.57644	5.02314	0.347396	2.68527	-4.48457	-3.72001	-4.10229	-2.70586	-1.78362	-2.24474	5.12978	6.00272	5.56625	3.90327	-0.767726	1.56777	-2.04351	-1.16701	-1.60526	-0.701459	-0.826969	-0.764214
Gh_D11G0885	0.120158	0.200338	0.0795975	0.0853447	0.0685553	0.0807079	0.0306842	0.036432	0	0.0544748	0.0497892	0.0542903	0.160402	0.0854535	0.0846533	0.0952369	0.0268045	0.0302087	0	0	0	0	0.113216	0		0.500602	-1.87878	-0.689087	-0.67689	-0.652607	-0.664749	1.22635	0.0824297	0.654391	1.46407	1.38631	1.42519	-2.16439	-2.7294	-2.44689	1.09474	0.994161	1.04445	1.31019	1.07475	1.19247	1.88351	2.22226	2.05288
Gh_D11G1511	0	0	0	0	0.0643617	0.075771	0	0	0.0435423	0.0511425	0	0	0	0.0401131	0	0	0.100659	0.198526	0.172067	0.235302	0.0936744	0.101232	0.10629	0.0578428		-1.96505	-1.73294	-1.84899	0	0	0	1.40126	-0.917572	0.241844	0	0	0	-0.756059	0.223793	-0.266133	0.0174357	0.468979	0.243207	0.541452	0.417948	0.4797	-0.677529	-1.55533	-1.11643
Gh_D11G1939	0.705282	0.718612	0.389339	0.333961	0.268262	0.236862	0.660384	0.570246	0.499087	0.586202	0.292244	0.265553	0.274605	0.334386	0.303651	0.248447	0.681773	0.591046	0.268943	0.245187	0.553121	0.562586	0.166133	0.120546		-0.498909	-0.293815	-0.396362	-0.413853	-0.33068	-0.372267	0.0337152	0.497468	0.265591	-1.12089	-1.19865	-1.15977	-0.0489088	-0.281943	-0.165426	-0.533726	-0.445797	-0.489762	1.04395	1.24803	1.14599	-1.99097	-2.242	-2.11648
Gh_D11G2004	154.847	156.13	114.955	113.123	105.801	103.889	128.517	129.751	112.302	110.74	135.555	132.949	134.475	130.874	108.026	106.177	53.4117	52.1928	87.2111	86.0649	157.967	154.279	182.556	179.107		-0.46346	-0.495571	-0.479516	0.237809	0.232981	0.235395	0.345985	0.333136	0.33956	-0.250581	-0.289274	-0.269927	-1.53562	-1.58083	-1.55822	-0.398486	-0.394395	-0.39644	0.57827	0.570499	0.574384	0.50638	0.465076	0.485728
Gh_D12G0210	0.0651958	0	0	0	0	0	0.0332975	0	0.100659	0.118228	0	0.0589141	0	0	0	0	0	0	0	0	0.144367	0.117011	0.061429	0.0668589		0.626625	-0.523963	0.0513311	0	-1.52885	-0.764425	0	0	0	2.35205	0	1.17602	1.38268	0	0.691342	0	0	0	-0.235794	-0.538891	-0.387342	0.883506	-1.34634	-0.231419
Gh_D12G0211	0	0	0	0	0	0	0	0	0.0496905	0.0583639	0	0	0	0	0	0	0	0	0.0490908	0.0537054	0	0	0	0		-1.77449	-1.54239	-1.65844	0	0	0	0	0	0	0	0	0	0	0	0	-1.79201	-1.6624	-1.7272	0	0	0	0	0	0
Gh_D12G1029	102.027	104.573	12.4645	11.6213	19.1369	19.6248	11.1618	11.6936	129.962	129.122	6.82816	6.65338	32.8017	32.1655	15.0951	14.6665	18.0672	16.3364	19.0295	18.6731	14.9776	14.6129	22.7943	21.8129		0.349139	0.304224	0.326682	-0.868256	-0.804612	-0.836434	0.777413	0.712836	0.745125	0.435511	0.326805	0.381158	-2.49751	-2.67835	-2.58793	0.610413	0.68419	0.647301	-0.353551	-0.425435	-0.389493	1.0301	0.899462	0.964783
Gh_D12G1030	0.53832	0.664841	0.633964	0.764705	0.409512	0.241053	0.274936	0.362709	0.55409	0.596572	0.446121	0.486452	0.359309	0.297764	0.337116	0.347657	0.0533718	0.0902253	0.0912338	0.149715	0.827804	0.67989	0.732647	0.797409		0.0416563	-0.156313	-0.0573284	-0.506966	-0.652606	-0.579786	-0.188681	0.304819	0.0580692	0.294149	-0.0611479	0.116501	-3.33431	-2.88141	-3.10786	-2.79676	-2.35268	-2.57472	1.01538	1.49595	1.25567	1.41402	1.13651	1.27526
Gh_D12G1031	5.01818	4.86439	1.46885	1.32624	2.53017	2.66514	3.15897	3.29072	5.27029	4.97334	1.0155	0.896388	2.0642	1.99189	2.43914	2.68243	2.34301	2.52322	0.84553	0.730272	1.87355	1.88507	4.72824	4.78715		0.0707181	0.0319562	0.0513371	-0.532497	-0.565147	-0.548822	-0.293652	-0.420073	-0.356862	-0.373082	-0.294863	-0.333972	-1.0988	-0.946993	-1.0229	-0.796759	-0.860836	-0.828798	-0.43346	-0.499593	-0.466527	0.581849	0.540764	0.561306
Gh_D12G2304	1.6676	1.85358	4.41874	0	1.90287	4.48038	4.25847	2.02247	0	1.51204	2.76397	1.50692	2.22613	2.37191	1.56647	1.76231	0.744006	0.838496	0	0	2.76951	1.9953	4.71376	3.42028		-3.29417	-0.293818	-1.79399	-0.676893	3.148	1.23555	0.226361	-0.917572	-0.345605	-1.44282	-0.198651	-0.820734	-1.16439	-1.14444	-1.15441	-4.70003	0	-2.35001	0.541454	-1.16702	-0.312781	0.146543	0.757996	0.45227
Gh_D12G2367	1.02877	1.20369	0.43042	0.384581	0.24714	0.290949	0.193577	0.197005	1.12857	1.17828	0.85257	0.636073	0.108421	0.0770143	0.0508621	0.057221	0.917978	0.952887	0.578123	0.496939	0.299746	0.388716	0.306104	0.222108		0.133575	-0.0307815	0.051397	0.986073	0.725905	0.855989	-1.18868	-1.91757	-1.55313	-1.92824	-1.78362	-1.85593	-0.164389	-0.337087	-0.250738	0.425631	0.369781	0.397706	0.278412	0.41795	0.348181	0.661114	0.173029	0.417072
Gh_D13G0016	1.23062	1.24352	0.889324	0.953536	0.829781	0.90173	0.885637	1.05154	0.561367	0.557914	0.60264	0.707668	0.746724	0.755845	0.683086	0.679816	0.274523	0.281262	0.426609	0.513382	1.26963	1.10434	1.47575	1.37674		-1.13237	-1.15632	-1.14434	-0.561413	-0.430215	-0.495814	-0.152156	-0.254605	-0.20338	-0.374648	-0.629288	-0.501968	-2.16439	-2.14444	-2.15441	-1.05979	-0.893255	-0.976525	0.613606	0.292417	0.453011	0.736661	0.388752	0.562707
Gh_D13G0300	9.32806	10.5581	2.93893	2.82793	1.81729	1.98662	3.89264	4.6908	9.2647	7.99377	3.06389	3.64926	2.61954	2.34613	3.01874	3.42621	4.13637	4.31851	2.81961	2.70501	4.12485	3.84515	5.14485	3.9664		-0.00983281	-0.401402	-0.205618	0.0600735	0.367858	0.213966	0.527525	0.239967	0.383746	-0.366802	-0.45322	-0.410011	-1.17321	-1.28974	-1.23148	-0.0597954	-0.0641125	-0.0619539	1.18255	0.952724	1.06764	0.40238	-0.242004	0.0801881
Gh_D13G1265	103.351	82.7791	60.4091	46.4191	71.9732	60.231	25.2278	14.7464	122.609	97.1553	70.5351	57.6838	71.0119	52.4232	63.8892	49.3902	48.8227	35.918	48.6835	41.8471	78.6695	65.922	43.6776	37.4073		0.246513	0.231026	0.238769	0.223575	0.313448	0.268512	-0.019399	-0.200301	-0.10985	1.34056	1.74386	1.54221	-1.08193	-1.20456	-1.14324	-0.311333	-0.149591	-0.230462	0.128345	0.130254	0.129299	0.791879	1.34296	1.06742
Gh_D13G2322	4.21731	4.48818	4.8147	5.03488	2.61094	2.89296	2.45179	2.82945	1.59319	1.66788	4.83352	4.82452	2.42561	2.52065	1.49612	1.49352	2.00167	1.98518	2.70311	2.73261	2.58304	2.65724	2.45183	2.53052		-1.4044	-1.42812	-1.41626	0.0056283	-0.061572	-0.0279718	-0.106222	-0.198751	-0.152486	-0.71261	-0.921805	-0.817207	-1.07512	-1.17686	-1.12599	-0.832826	-0.881678	-0.857252	-0.0154993	-0.122618	-0.0690586	2.35368e-05	-0.161088	-0.0805321
Gh_Sca004818G01	0.550493	0.5439	0.243112	0.260666	0.139591	0.082168	0.0937179	0.0741823	0.755494	0.720983	0.20276	0.276362	0.163304	0.173999	0.114913	0.1616	0.300183	0.276797	0.373188	0.408268	0.304749	0.512301	0.115264	0.188179		0.456696	0.406624	0.43166	-0.261848	0.0843568	-0.0887456	0.226354	1.08243	0.654392	0.294145	1.12328	0.708713	-0.874882	-0.974513	-0.924698	0.618281	0.647314	0.632798	1.12642	2.64034	1.88338	0.298545	1.34296	0.820752
Gh_Sca004818G02	0.0651958	0.0724668	0	0	0	0	0	0.0395348	0	0	0	0	0	0	0	0	0	0	0	0	0	0	0	0		1.38268	1.23014	1.30641	0	0	0	0	0	0	0	2.10434	1.05217	1.38268	1.23014	1.30641	0	0	0	0	0	0	0	2.10434	1.05217
Gh_Sca004818G03	0	0	0.0839484	0	0	0	0	0	0	0	0.0525107	0	0	0	0	0	0	0	0	0	0	0	0	0		0	0	0	-0.676891	0	-0.338446	0	0	0	0	0	0	0	0	0	1.01796	0	0.50898	0	0	0	0	0	0
Gh_Sca004818G04	0	0	0	0	0	0	0	0	0	0	0	0	0	0	0	0	0.0271258	0.0305709	0	0	0	0	0	0		0	0	0	0	0	0	0	0	0	0	0	0	-2.6478	-2.4753	-2.56155	0	0	0	0	0	0	0	0	0
Gh_Sca004818G05	0	0	0	0	0.135903	0.159994	0.030414	0	0	0	0.148052	0.107624	0	0	0	0	0	0	0	0	0.0988991	0.106878	0	0		0	0	0	-0.199431	-0.659535	-0.429483	0.322957	0.0875169	0.205237	2.48273	0	1.24136	0	0	0	0	0	0	-0.458548	-0.582053	-0.5203	2.48273	0	1.24136
Gh_Sca004818G06	0	0	0	0	0	0	0	0	0.0442185	0.0519368	0.0474695	0.103522	0.0382323	0.0407361	0.0538062	0.0302666	0.0255556	0	0	0	0.0634194	0.0685362	0	0		-1.94281	-1.71071	-1.82676	-1.84046	-0.715597	-1.27803	-2.15267	-2.06115	-2.10691	-1.65969	-2.48974	-2.07471	-2.73382	0	-1.36691	0	0	0	-1.42254	-1.3106	-1.36657	0	0	0
Gh_Sca005023G04	33.0568	30.5103	30.9703	27.085	17.7826	15.9391	13.7176	12.278	13.8531	14.2908	14.7738	13.0156	16.824	15.8687	12.3931	11.3848	7.26887	6.55956	17.8728	15.662	16.4373	14.7264	13.5155	12.2888		-1.25474	-1.09421	-1.17447	-1.06784	-1.05725	-1.06255	-0.0799455	-0.00638623	-0.0431659	-0.146491	-0.108967	-0.127729	-2.18514	-2.21763	-2.20138	-0.79312	-0.790226	-0.791673	-0.113493	-0.114165	-0.113829	-0.0214132	0.00126847	-0.0100724
Gh_Sca011376G01	0.0722809	0.0803422	0	0	0.0824787	0.0970995	0.18458	0.219156	0	0	0.0599012	0.0653165	0.0964899	0.102809	0.0339487	0.0381931	0.0322484	0.036344	0.110251	0.120615	0.0400141	0.0432425	0	0		1.23385	1.0813	1.15758	-1.50488	-1.38002	-1.44245	0.226356	0.0824308	0.154394	-2.44282	-2.52057	-2.4817	-1.16439	-1.14444	-1.15441	-0.624743	-0.495125	-0.559934	-1.04351	-1.16701	-1.10526	-0.118711	-0.366423	-0.242567
Gh_Sca012292G01	0	0	0	0	0	0	0	0	0	0	0	0	0	0	0	0	0	0	0	0	0	0	0	0		0	0	0	0	0	0	0	0	0	0	0	0	0	0	0	0	0	0	0	0	0	0	0	0
Gh_Sca089082G01	0	0	0	0	0	0	0	0	0	0	0	0	0	0	0	0	0	0	0	0	0	0	0	0		0	0	0	0	0	0	0	0	0	0	0	0	0	0	0	0	0	0	0	0	0	0	0	0
Gh_Sca122440G01	0	35.0959	0	44.8529	0	21.208	8.06304	19.1469	0	0	39.2501	28.5323	10.5374	0	7.41492	8.34196	0	7.93809	0	0	17.4794	0	0	16.19		0	-7.68962	-3.84481	7.85102	-0.652605	3.59921	5.95384	-6.96293	-0.504545	-0.120893	-1.19865	-0.659773	0	-2.14444	-1.07222	0	-8.04352	-4.02176	6.68398	-6.96293	-0.139476	-5.56772	-0.242008	-2.90486
Gh_Sca133970G01	0	0	0	0	0	0	0	0	0	0	0	0	0	0	0	0	0	0	0	0	0	0	0	0		0	0	0	0	0	0	0	0	0	0	0	0	0	0	0	0	0	0	0	0	0	0	0	0
Gh_Sca168900G01	0	0	0	0	0	0	0	0	0	0	0	0	0	0	0	0	0	0	0	0	0	0	0	0		0	0	0	0	0	0	0	0	0	0	0	0	0	0	0	0	0	0	0	0	0	0	0	0
[truncated: 9 more columns]
